# Supplementary material for: A meta-analysis of public RNA-Seq data identifies conserved stress responses in rainbow trout
Source: BMC Genomics. 2025 Nov 5;26:999. doi: 10.1186/s12864-025-12127-2 (PMC12590911; doi:10.1186/s12864-025-12127-2)
Supplement: Supplementary file 1 — Supplementary material 1. [file 12864_2025_12127_MOESM1_ESM.xlsx]

## Sheet: Supplementary Table S1
	Supplementary Table S1: Detailed information on the RNA-Seq datasets, including GEO ID, Bio Project, SRA run, stress type, temperature, tissue, sampling duration, and reference genome.
SN	NCBI GEO Title	Instrument	BioProject	GEO ID	SRA Run	Library Layout	Stress	Experiment	Stress Temperatutre (°C) & Hypoxia (mg/L)	Weight	Tissue	Time	Reference Genome	DOI
1.	Integrated transcriptome and Ribosome Profiling analyses elucidate the liver response of rainbow trout (Oncorhynchus mykiss) to heat stress	Illumina NovaSeq 6000	PRJNA1092638	GSE262612	SRR28475464	Paired-end	Optimum Temperature	Control	18 °C	400 ± 10.5 g	Liver	7 d	Omyk_1.1	https://doi.org/10.1016/j.gene.2017.03.041
					SRR28475465	Paired-end	Optimum Temperature	Control	18 °C	400 ± 10.5 g	Liver	7 d	Omyk_1.1
					SRR28475466	Paired-end	Optimum Temperature	Control	18 °C	400 ± 10.5 g	Liver	7 d	Omyk_1.1
					SRR28475467	Paired-end	Increase Temperature	Treatment	24 °C	400 ± 10.5 g	Liver	7 d	Omyk_1.1
					SRR28475468	Paired-end	Increase Temperature	Treatment	24 °C	400 ± 10.5 g	Liver	7 d	Omyk_1.1
					SRR28475469	Paired-end	Increase Temperature	Treatment	24 °C	400 ± 10.5 g	Liver	7 d	Omyk_1.1
2.	Identification and analysis of long non-coding RNAs reveals regulatory mechanisms responses to heat stress in rainbow trout (Oncorhynchus mykiss)	Illumina HiSeq 4000	PRJNA559610	GSE135668	SRR9943833	Paired-end	Optimum Temperature	Control	18 °C	200 ± 5.5 g	Liver	7 d	Omyk_1.0	https://doi.org/10.1007/s10126-021-10082-z
					SRR9943834	Paired-end	Optimum Temperature	Control	18 °C	200 ± 5.5 g	Liver	7 d	Omyk_1.0
					SRR9943835	Paired-end	Optimum Temperature	Control	18 °C	200 ± 5.5 g	Liver	7 d	Omyk_1.0
					SRR9943836	Paired-end	Increase Temperature	Treatment	24 °C	200 ± 5.5 g	Liver	7 d	Omyk_1.0
					SRR9943837	Paired-end	Increase Temperature	Treatment	24 °C	200 ± 5.5 g	Liver	7 d	Omyk_1.0
					SRR9943838	Paired-end	Increase Temperature	Treatment	24 °C	200 ± 5.5 g	Liver	7 d	Omyk_1.0
3	Transcriptome and biochemical parameters analysis in rainbow trout (Oncorhynchus mykiss) reveals physiological changes and molecular mechanisms in response to chronic and acute hypoxia stress	Illumina NovaSeq 6000	PRJNA1064938	GSE253274	SRR27553658	Paired-end	Acute Hypoxia	Treatment	4.5 ± 0.1 mg/L	200 ± 10.5 g	Muscle	12 h	Omyk_1.1
					SRR27553659	Paired-end	Acute Hypoxia	Treatment	4.5 ± 0.1 mg/L	200 ± 10.5 g	Muscle	12 h	Omyk_1.1
					SRR27553660	Paired-end	Acute Hypoxia	Treatment	4.5 ± 0.1 mg/L	200 ± 10.5 g	Muscle	12 h	Omyk_1.1
					SRR27553661	Paired-end	Chronic Hypoxia	Treatment	3 ± 0.1 mg/L	200 ± 10.5 g	Muscle	12 h	Omyk_1.1
					SRR27553662	Paired-end	Chronic Hypoxia	Treatment	3 ± 0.1 mg/L	200 ± 10.5 g	Muscle	12 h	Omyk_1.1
					SRR27553663	Paired-end	Chronic Hypoxia	Treatment	3 ± 0.1 mg/L	200 ± 10.5 g	Muscle	12 h	Omyk_1.1
					SRR27553664	Paired-end	Control	Control	8.5 ± 0.1 mg/L	200 ± 10.5 g	Muscle	12 h	Omyk_1.1
					SRR27553665	Paired-end	Control	Control	8.5 ± 0.1 mg/L	200 ± 10.5 g	Muscle	12 h	Omyk_1.1
					SRR27553666	Paired-end	Control	Control	8.5 ± 0.1 mg/L	200 ± 10.5 g	Muscle	12 h	Omyk_1.1
4	Combined application of whole transcriptome sequencing participates in glucose transport under hypoxia stress in rainbow trout (Oncorhynchus mykiss)	Illumina HiSeq 4000	PRJNA1000995	GSE239806	SRR25482873	Paired-end	Acute Hypoxia	Treatment	4.5 ± 0.1 mg/L	200 ± 10.5 g	Liver	12 h	Omyk_1.1	https://doi.org/10.1016/j.aquaculture.2024.741250
					SRR25482874	Paired-end	Acute Hypoxia	Treatment	4.5 ± 0.1 mg/L	200 ± 10.5 g	Liver	12 h	Omyk_1.1
					SRR25482875	Paired-end	Acute Hypoxia	Treatment	4.5 ± 0.1 mg/L	200 ± 10.5 g	Liver	12 h	Omyk_1.1
					SRR25482876	Paired-end	Moderate Hypoxia	Treatment	3 ± 0.1 mg/L	200 ± 10.5 g	Liver	12 h	Omyk_1.1
					SRR25482877	Paired-end	Moderate Hypoxia	Treatment	3 ± 0.1 mg/L	200 ± 10.5 g	Liver	12 h	Omyk_1.1
					SRR25482878	Paired-end	Moderate Hypoxia	Treatment	3 ± 0.1 mg/L	200 ± 10.5 g	Liver	12 h	Omyk_1.1
					SRR25482879	Paired-end	Control	Control	8.5 ± 0.1 mg/L	200 ± 10.5 g	Liver	12 h	Omyk_1.1
					SRR25482880	Paired-end	Control	Control	8.5 ± 0.1 mg/L	200 ± 10.5 g	Liver	12 h	Omyk_1.1
					SRR25482881	Paired-end	Control	Control	8.5 ± 0.1 mg/L	200 ± 10.5 g	Liver	12 h	Omyk_1.1
