# Supplementary material for: A meta-analysis of public RNA-Seq data identifies conserved stress responses in rainbow trout
Source: BMC Genomics. 2025 Nov 5;26:999. doi: 10.1186/s12864-025-12127-2 (PMC12590911; doi:10.1186/s12864-025-12127-2)
Supplement: Supplementary file 2 — Supplementary material 2. [file 12864_2025_12127_MOESM2_ESM.xlsx]

## Sheet: FPKM_Samples
Figure 2. FPKM values of significantly expressed genes across different samples.
Gene_Symbol	SRR9943833	SRR9943834	SRR9943835	SRR9943836	SRR9943837	SRR9943838	SRR25482874	SRR25482875	SRR25482876	SRR25482877	SRR25482878	SRR25482879	SRR25482880	SRR25482881	SRR27553658	SRR27553659	SRR27553660	SRR27553661	SRR27553662	SRR27553663	SRR27553664	SRR27553665	SRR27553666	SRR28475464	SRR28475465	SRR28475466	SRR28475467	SRR28475468	SRR28475469
Metazoa_SRP	353108	487285	424112	552126	596028	575851	424777	439497	448158	478424	586758	503239	542586	433155	2.61605	5.49297	4.65184	2.77225	0.118395	1.63813	3.23745	5.60736	3.27324	39.5166	58.92	150.028	62.8166	41.282	36.2587
Metazoa_SRP	174510	237250	203819	270489	298442	286569	174021	223450	219339	184377	307842	249874	275662	206848	1.63378	3.41137	3.34247	1.46555	0.118395	0.758526	2.20992	2.7194	1.35251	19.9886	27.5007	69.8063	32.7012	19.8137	17.593
Metazoa_SRP	93597.1	97475.9	108730	154057	144803	157761	193965	224903	337337	289738	395186	262469	243702	213018	2.42155	3.42564	2.13846	1.91551	0.218943	1.8374	3.3002	2.34321	0.987798	21.0078	26.2198	74.1003	28.9767	24.4028	12.6615
apoa2	85788.1	108949	116957	107174	66178.1	109348	36697.8	35803.7	88264.4	79718.5	72311.8	41709.9	49415.2	41847.1	30.7306	15.25	176.323	1.90667	1357.18	7.03667	127.06	1716.01	1628.18	65097.7	67135.1	98166.9	98124.1	100314	100902
Metazoa_SRP	80712.3	77913.1	93530.6	124706	117161	136196	213680	189749	350851	277935	346727	219760	231633	201996	1.62218	3.71037	2.00736	2.03256	0.218729	1.83701	3.07703	2.48807	0.837683	20.7993	26.3732	74.8149	29.0958	22.255	13.3085
btd	51492.4	18826.1	12817.8	12168.3	17617.8	11705.3	3570.94	2036.46	5383.84	7008.82	7931.83	8876.29	3921.86	3978.66	2.85812	0.993804	2.60006	0.501239	174.068	1.2816	6.87236	53.8566	156.314	4282.37	4500.06	5617.25	7256.91	7589.46	7364.96
apoa2	30188.8	37358.4	42924.5	42873.5	25770.4	30055.3	20537.2	22606.1	57557.3	55702.9	51032	24268.6	28739.1	25203.9	0	0	114.275	0	1386.14	0	110.643	1422.97	1225.97	21632.3	22353.4	32305.6	33997	33842.6	34139.3
apoc4	25004.5	28949.6	28782.2	26131.5	20954.7	35126	8294.12	8276.74	10361.5	11743.9	11087.4	8664.65	11194.6	9549.86	4.79671	2.22721	20.5164	0	272.814	1.27803	13.6659	204.392	204.507	13382.1	14018.6	21227.4	14717.4	14940.2	14993.4
RNaseP_nuc	22455.6	30577.3	36674.9	68424	66912.3	56843.4	31142.8	30583.1	62081.5	52533.8	61537.9	31638.6	30676.6	27565.5	0	0	0	2.51623	0	0	0	1.88312	0	1.74026	1.53896	0	0	1.80844	0
lyz2	22388.5	26161.3	5111.1	2996.06	1539.32	1817.82	4224.95	4066.19	5438.02	9138.25	9533.04	9340.86	5844.22	5341.37	41.6863	43.6754	41.7288	52.3114	218.588	38.7838	196.089	148.617	172.058	1614.07	1604.22	2359.37	1909.24	1764.32	1860.88
ambp	17858.2	12.094	114.224	10.2973	12.6141	10.0117	10.4511	10.9685	21794.8	20.6262	17.8057	10.1274	13587.6	11.0287	0	0	0	0	0	0	0	0	0	0	0	0	0	0	14538.7
si:ch1073-126c3.2	17341.3	20471.4	128.257	12453.1	157.945	359.94	1557.06	1336.7	221.623	318.152	311.397	3541.88	3352.16	3002.65	0	0	0.153176	0	106.627	0	0.275767	0.31682	0.242428	134.389	125.68	11261.4	166.671	105.217	101.41
spp2	16366.8	128.938	121.93	16.5658	29.8723	18.1994	12.0685	5242.08	30.879	34.9741	10141.3	14.8799	5.42748	3.50126	0	0	0	0	0	0	0.3026	0	0.293073	0	14459.6	20657.2	16222.8	16252.2	16238
btd	11394.6	4913.04	3369.09	2741.37	3868.39	2651.68	639.231	361.434	1008.37	1158.18	1377.57	1609.89	685.181	693.916	0.334227	0	0.669794	0	29.9379	0	1.53426	8.80519	32.6018	929.57	950.351	1071.88	1651.25	1649.93	1640.66
apoa-i-2	11371.2	12183.8	13462	18066.6	9291	6136.96	458.922	953.871	2146.95	497.076	1493.83	665.838	801.362	679.366	1.64914	1.07845	4.12802	0	29.1966	1.85948	2.01983	36.153	8.03017	11220.6	11358.3	16032.7	8806.9	8246.02	8014.48
leg1	10859.9	10465.2	16242.8	8402.43	5204.19	10364.1	10092.2	9516.42	14509.1	15121.8	15160.8	10146.3	10956.3	9658.01	5.62739	3.41852	35.71	0.496557	294.699	1.18975	24.311	262.405	318.752	11834.8	12083.3	18154.3	15955.9	15881.2	15571.6
SELENOP	8156.21	7812.85	9212.26	11511.2	7934.08	15041.2	4331.2	3653.33	6804.87	6378.22	6420.58	3729.29	4237.27	3852.36	236.12	186.928	307.532	245.225	404.54	281.856	326.567	500.507	415.021	5746.1	6339.66	7475.98	5077.05	5149.84	5022.15
shbg	6966.26	6202.16	5886.48	6538.97	5478.14	5856.62	3167.82	3094.06	3461.19	4006.13	3684.14	3285.21	2895.46	2674.31	1.09972	0.619202	6.63776	0.225881	74.2866	0.688312	2.68831	79.4986	62.8977	3378.67	3391.47	4445.68	2867.31	2836.89	2731.92
CFI	6494.86	10937.9	5870.81	6484.94	2304.03	2700.41	3067.15	3061.62	2898.09	3424.61	3384.65	3329.21	2832.5	2562.45	0.155773	0.842593	4.94444	0	63.0133	0	2.55773	57.2301	58.6876	1599.69	1554.11	1990.08	744.344	785.832	796.4
spink2.1	6218.45	7188.18	4831.8	7264.09	6891.08	6156.14	2437.6	2596.92	6345.68	6765.43	5750.12	3385.54	3720.36	3463.83	63.9369	51.8097	100.644	67.0917	223.003	65.7915	115.375	218.087	190.344	5994.73	6143.36	8883.37	6540.62	6437.43	6627.7
APOH	6049.79	105.375	1011.64	1481.18	1555.17	115.327	114.699	103.476	1606.39	1450.58	1317.92	119.4	1102.23	113.297	0	0	0	0	0	0	0	0	0.290269	1.82105	185.55	210.114	2271.51	155.558	120.476
TDO2	5664.97	4335.83	6474.2	7481.19	6525.24	10404.5	1950.77	1677.82	2778.12	2786.36	2818.58	1766.17	1513.98	1373.75	0.894391	0.856205	6.91617	0.301313	51.8992	0.97852	2.25239	41.9338	31.1695	2906.53	2956.72	3839.56	2370.01	2322.22	2263.85
ttr	5402.44	7302.4	7351.86	3006.98	1787.37	3460.81	2821.64	2852.09	4205.16	4433.26	4537.73	2529.65	3247.51	2779.78	1.89159	0.951402	11.6692	0.994393	85.0243	0	8.76822	64.8794	56.3421	3117.53	3406.49	5183.46	4126.24	3922.72	3966.67
rpl30	5389.02	6361.68	5723.9	7113.43	6424.73	7802.39	2222.83	2391.46	3874.31	3804.57	4111.51	2495.02	2928.71	2513.15	2075.31	2019.38	2541.13	2273.16	2487.25	2366.12	2548.39	3009.37	2861.27	3244.7	3329.89	4961.86	3932.27	3634.76	3661.28
SelPb	5322.54	6004.75	5594.13	5210.95	3026.82	5575.75	2429.5	2652.89	4466.52	5450.05	4551.86	3068.21	3023.73	2741.27	0.874552	0.273596	8.17324	0	74.6619	0	2.72521	71.7091	82.5135	1573.41	1594.66	2073.97	2102.67	2038.44	1936.39
ptgdsa	5176.11	5227.16	6526.06	6648.74	5438.89	9894	2295.31	2552.37	2482.01	2782.26	2941.05	2285.48	2616.95	2320.91	3.76305	3.87249	10.4468	1.68976	144.586	1.15562	11.8173	113.841	129.873	4166.04	4223.9	5739.69	4055.09	3841.77	3698.7
serping1	4211.66	6870.51	6144.15	2.32051	1.72352	10.2855	0	0.070352	0.747375	0.663879	0.781667	0.431748	0.095679	0	0	0	0	0	0	0	0	0	0	0.074447	0.058063	0.03358	0	0.056974	0.172479
APOH	3873.59	4035.23	4010.33	5040.17	3795.57	4922.58	2215.11	2126.06	2809.5	3291.96	2973.2	2454.89	2243.08	2018.58	1.1641	0.896965	9.88448	1.004	82.8722	1.1247	6.20498	61.2734	70.725	2775.83	2783.49	3754.81	2232.28	2211.45	2167.71
fabp10b	3870.31	4257.86	5316.91	2528.29	1430.65	2603.4	750.42	746.519	1172.15	1287.62	1155.6	852.375	984.656	848.358	1.89052	0.658211	2.3538	0	28.2537	0.383178	2.38318	31.227	33.0975	2714.83	2869.46	4205.59	3599.39	3411.79	3383.42
rpl13a	3726.23	4247.08	3595.45	3671.2	3336.31	3908.58	0.822564	1821.38	18.1416	2607.68	0	1.95082	2.37309	2036.05	0	0	0	0	0	0.376229	0	0.824771	0	0	0	0	0	0	0
rpl37a	3689.49	10.2339	4594.48	4184.23	4352.52	2.87299	0.681063	1.4853	4.14634	4856.71	6152.03	2.85095	2.83268	2.24532	0.094394	0.115801	0.117465	0.098705	0.114775	1.01118	0.116267	0.286841	0.096123	0.123636	0.692061	0.093564	0.094849	0.121113	0.146564
RPS2	3678.74	1834.35	2231.06	989.159	1481.36	3534.89	3892.47	4741.62	9513.44	9189.97	8336.42	3709.29	6720.72	5417.63	2252.37	3659.76	4206.55	4151.67	3724.83	3942.27	4571.21	5883.83	4777.01	2791.38	2933.43	4160.44	3594.17	3238.79	3105.05
f10	3604.9	3967.39	4200.25	4851.71	3705.26	5599.62	1538.83	1549.84	1593.12	1895.71	1966.87	1524.83	1498.31	1313.35	0.880092	0.218216	9.2389	0.086338	64.2015	0.318469	3.36337	50.5681	45.8351	2038.94	2074.42	2689.22	1703.32	1715.78	1618.16
serpinc1	3569.05	3561.72	4498.02	2347.45	1944.07	2201.57	2686.32	2813.55	3019.8	3330.47	3111.43	2898.25	2603.2	2351.81	2.26377	0.557244	7.59763	0.73448	79.0259	0.765487	4.78617	74.2716	73.7205	1163.46	1135.95	1633.1	1128.94	1117.55	1070.37
slc31a1	3513.7	2886.74	1814.25	3321.37	4139.41	4180.9	442.045	428.799	1179.51	1390.88	1552.47	439.126	621.466	544.39	14.1577	10.7371	14.5456	11.5382	37.3059	10.6587	18.4246	27.9757	21.1677	1740.57	1736.82	2488.56	654.569	679.667	709.624
fabp3	3393.35	3145.04	3156.4	3362.57	3986.08	2682.21	1448.93	1192.83	1136.83	1440.34	1186.07	1586.14	1509.22	1451.07	65.9863	72.7883	86.3777	68.1674	161.679	111.533	79.8969	183.348	190.007	4591.52	4573.53	6324.27	4880.32	4084.63	4077.18
rpl27	3281.02	3257.11	2749.61	4519.71	2871.67	5408.52	2107.57	2112.68	3198.14	3340.46	3802.37	2232.33	2807.43	2506.5	2068.36	2097.02	2550.84	2188.52	2551.8	2317.19	2779.05	2888.79	2959.75	2180.43	2328.89	3616.55	2837.46	2550.57	2550.97
serpinc1	3182.14	2166.35	3025.54	2740.81	2302.31	2799.76	2184.1	2195.9	2791.55	2939.85	2636.22	2140.84	2210.02	1928.2	1.19806	1.78202	13.6211	0.338536	79.6881	0.623789	5.32239	74.169	81.5589	3097.94	3103.66	4450.25	3155.05	3064.38	3002.79
c8g	2951.17	3559.59	3542.47	2464.92	2014.69	2486.37	2338.8	2451.84	3040.32	3627.26	3251.97	2701.35	3039.06	2714.3	1.15256	1.31139	11.6719	0.308255	127.535	2.84953	8.85893	107.465	130.95	3486.04	3627.66	5139.37	3286.99	2993.81	3015.49
nme4	2907.72	3137.47	3862.36	3446.87	2911.63	5211.03	690.816	691.979	963.606	943.749	1041.26	638.556	723.521	607.526	0.879383	0.211781	3.02034	0.391304	28.6872	0	1.96774	24.9341	35.0049	3950.93	4062.38	5609.87	2532.95	2432.92	2415.32
ppib	2849.9	2781.79	2522.31	3342.79	3364.54	3192.2	431.242	430.124	424.846	516.159	573.616	684.588	653.915	608.739	199.018	204.137	228.389	176.53	209.932	208.91	356.677	252.385	206.908	2780.65	2751.14	3852.85	1653.29	1518.67	1568
RPS2	2834.51	5562.87	4369.34	5429.75	4154.55	2777.84	2069.18	1405.6	2536.94	3542.75	4745.14	2318.43	1560.32	1393.94	2057.57	578.628	874.565	945.483	1911.47	1439.23	2524.6	563.485	1616.33	1945.4	2049.88	2867.29	2628.68	2371.62	2314.06
sdc2	2809.86	15.0913	3515.75	20.8547	1408.64	15.2996	1.57744	1.29839	2.63281	1010.8	47.1718	28.4051	1.55858	1.08102	2.38025	2.03672	2.18728	1.19813	1.96864	1.50544	2.43336	2.58362	0.248697	4.0745	3.60912	1176.46	1035.25	1042.08	1006.27
f9b	2728.89	3600.7	3214.66	2330.64	1910.73	2690.32	1221.2	1228.56	1522.54	1706.99	1773.97	1320.12	1187.38	1028.08	0	0.342256	4.55513	0	42.5886	0.155242	2.78521	38.4337	40.1609	1214.52	1202.95	1654.54	1309.43	1309.56	1311.19
RNase_MRP	2638.65	2657.11	1906.07	2262.15	3248	3850.08	7544.79	10227.6	5373.98	5361.85	7365.21	10315.6	10530.7	8404.76	0	0	0	0	0	0	0.847059	0	0	0	0	0	0.545098	0	0
rpl26	2590.71	3447.76	2790.94	3116.02	2778.19	4043.92	1522.38	1578.45	2315.2	2515.05	2683.46	1719.23	1919.28	1720.49	1348.46	1387.41	1674.52	1400.09	1764.94	1558.89	1991.81	1904.14	1855.07	1177.98	1192.75	1734.17	1427.67	1269.88	1215.13
gpx3	2552.88	1.64308	1031.86	4.12728	3756.56	3462.81	1194.33	1068.46	1.83417	2357.04	2066	1532.97	1318.74	0.616457	0.544075	0	0.646959	0.438995	0	0	1.12446	0	0.096773	0.200513	1.6504	1057.87	0.0891	0.08932	0.096913
scdb	2464.44	2779.14	4902.27	2701.57	2480.65	4875.1	218.142	139.944	85.9245	141.909	109.362	96.2887	75.7968	70.8583	10.5961	8.91912	11.1319	4.82549	9.31176	7.73873	12.2373	8.29118	8.06128	1951.41	2001.76	2581.18	5924.74	6056.92	5857.98
SERPINA10	2447.57	2701.11	2288.36	2260.35	1735.13	2711.51	733.749	779.029	989.996	1225.61	1088.83	972.746	949.451	891.547	0.184818	0	4.58251	0	28.8721	0.371287	3.81518	34.7814	33.7063	1639.72	1665.73	2242.09	1823.41	1904.4	1806.33
apoc4	2411.04	1724.65	1924.81	1037.09	2086.19	2723.92	588.368	745.479	700.079	1228.73	860.458	478.618	840.631	716.765	0	0	2.27699	0	36.706	0	2.65767	7.98722	17.125	503.798	477.826	745.911	627.831	574.44	558.255
rpl26	2393.71	2642.22	2297.59	2207.34	2037.22	2256.37	1796.43	1945.41	2846.03	2933.72	3305.7	2007.14	2427.84	2069.07	1772.15	1706.44	2062.42	1832.53	2234.59	1917.56	2591.28	2408.23	2464.43	1194.3	1240.88	1886.55	1566.53	1432.09	1340.07
rps3a	2366.5	2820.95	2818.87	2432.73	2624.44	3147.47	1498.26	1577.06	1966.07	2270.5	2411.45	1655.61	1939.39	1673.38	1483.35	1547.52	1773.4	1624.98	2006.41	1727.87	2333.76	2171.74	2208.75	1021.93	1003.4	1425.67	1313.24	1091.92	1061.1
rpl19	2311.92	2430.63	2349.28	2551.57	2298.03	2425.6	2274.04	2247.92	3466.96	3760.94	3794.8	2471.38	2798.19	2435.67	1557.58	1555.92	1820.79	1757.87	2049.58	1880.12	2428.9	2263.04	2251.83	1559.04	1647.22	2611.76	2065.56	1805.25	1787.95
ecm1b	2296.63	2365	1811.98	4421.71	3848.46	4701.05	1653.87	1605.85	1896.44	1818.77	1757.9	1453.22	1032.87	976.877	1.27574	1.13813	12.4796	0.557165	49.9705	0.626487	4.46249	54.5204	46.382	2278.99	2306.33	2976.13	2346.06	2351.96	2281.74
vtnb	2286.45	2684.71	2885.38	1936.33	1143.14	2131.82	703.745	743.259	832.587	950.334	873.218	765.423	590.06	584.908	0.394752	0	1.85397	0	26.0117	0	2.67256	21.6395	24.2228	761.809	768.914	1025.47	789.748	765.891	736.747
agt	2211	1946	1654.78	4827.98	5389.09	4722.89	920.722	880.712	1193.86	1397.09	1240.69	811.649	739.473	653.112	0.754847	0.792811	3.99515	0.264136	27.9818	0.253635	1.28029	25.9116	15.2987	3901.15	4085.68	5279.19	998.902	1058.17	1010.58
gstt1a	2174.61	1494.42	2294.19	2061.74	1739.49	1987.49	536.951	420.082	746.497	786.307	916.157	442.755	591.969	520.407	4.38586	1.44427	6.4166	4.19523	17.053	2.63413	8.71791	12.4842	13.0392	998.87	1062.23	1508.9	1382.09	1353.41	1350.69
rl23	2161.82	2970.87	2249.85	2570.26	2499.34	3269.39	1112.73	1217.15	1396.17	1439.65	1653.12	1265.18	1598.94	1299.75	1863.9	1815.35	2050.98	1998.43	2325.33	1985.17	2547.24	2504.83	2462.79	864.559	930.202	1503.93	1130.14	1004.99	1028.78
rps3a	2158.21	1.52343	2277.15	0.218295	0.049458	1.91745	0	0	1.04947	1.37952	0.710256	0	0.177705	0.088974	0	0	0	0	0	0	0	0	0	0	0	0	0	0	0
rpl27	2033.41	2965.74	2162.58	2832.17	2616.25	3319.25	1699.3	1716.38	2308.98	2600.13	2823.73	1887.43	2336.14	2060.41	1671.92	1683.14	2027.52	1791.24	2031.28	1872.75	2067.43	2540.71	2448.11	1858.75	1940.01	3012.09	2460.33	2224.88	2257.01
h6pd	2026.23	2083.37	2077.43	1932.82	1212.02	1303.28	549.321	444.535	1068.02	1487.92	1417.37	716.02	573.445	531.322	1.54513	0.577119	3.09066	0.864992	13.7881	1.6562	2.33399	11.3901	9.9325	701.26	701.548	869.204	411.556	429.012	417.882
rl15	2015.82	1925.28	2289.09	2844.3	2181.4	2607.17	1498.3	1608.26	2803.93	3008.25	3307.24	1746.4	2223.43	1858.77	1404.28	1410.94	1580.77	1530.26	1748.52	1571.91	2239.5	2080.53	2137.71	1817.79	1785.09	2673.12	2191.61	1925.94	1969.39
xbp1	2009.05	2207.48	1322.62	5491.6	4306.26	6997.51	518.944	390.018	1901.03	2032.13	2189.67	956.194	1229.04	1009.88	218.494	185.121	236.922	197.948	214.365	191.315	304.105	333.38	305.606	2151.25	2283.94	3227.13	567.809	610.26	568.838
rpl13a	2000.33	2641.53	2336.29	2678.09	2523.11	2658.7	959.102	1011.41	1584.51	1506.85	1587.54	1070.48	1236.43	1094.29	971.338	1021.6	1205.52	1095.3	1248.62	1106.32	1393	1340.3	1430.69	1113.12	1158.36	1767.25	1578.37	1377.19	1415.69
fgb	1970.72	0	0.506159	0.365062	1205.49	2333.61	0.074399	0	19658.2	212.6	1605.03	0.282284	0.426286	0.056155	0	0	0	0	0.00841	0	0	0	0	0.890922	1133.83	0	0.847737	0.023516	13003.2
rpl13	1855.71	2213.67	2126.02	1884.7	12.0646	20.0947	1190.37	1286.24	1833.86	2081.31	2269.12	1405.14	1573.07	1384.04	1249.96	1267.8	1445.14	1413.12	1656.26	1521.85	2112.32	1796.31	1846.45	5.28781	2.94456	1273.12	1159.57	1053.48	1006.71
aqp10a	1847.2	2201.92	2514.08	1304.77	773.254	1646.9	425.561	437.528	705.439	752.063	809.383	512.641	505.866	444.445	0.385432	0	1.96913	0	17.9561	0.111433	0.946937	20.0781	15.4549	735.918	751.962	980.811	1001.89	1052.38	984.852
rpl18	1798.65	1840.17	2107.9	2021.34	1922.34	2064.15	1287.1	1272.21	2218.75	2364.96	2378.77	1327.73	1491.83	1253.6	1298	1258.92	1618.83	1385.51	1605.62	1482.46	1933.92	1830.36	1854.57	1062.76	1059.15	1739.56	1449.19	1236.09	1252.39
rpl15	1763.14	1933.59	1741.94	2491.17	2192.02	2762.07	1868.92	2025.01	3207.57	3767.48	4165.58	2174.88	2523.43	2189.1	1853.81	1899.97	2111.83	2065.66	2283.3	2131.28	2788.62	2718.56	2709.73	1538.66	1513.73	2199.16	1877.6	1647.52	1569.22
rps15a	1752.04	1695.64	1401.55	1690.02	1877.13	1770.43	856.504	947.751	1398.26	1657.34	1749.37	1202.52	1166.38	970.323	903.273	800.906	925.179	851.247	981.441	893.106	1265.29	1101.55	1121.62	710.439	830.142	1237.94	1037.53	877.209	888.49
cyp2k5	1721.66	1705.8	1486.46	1386.57	640.263	2924.76	628.791	582.12	906.978	884.761	1111.16	742.676	959.47	849.521	0.732059	0	0.668951	0.608366	18.9895	0.676884	2.24378	23.0775	12.3615	743.418	776.454	958.015	705.728	721.566	711.677
rpl19	1637.54	1603.53	1652.1	1629.18	1426.08	1734.21	1528.44	1551.05	2596.09	2783.18	2669.66	1684.54	2006.77	1689.66	1293.98	1227.47	1533.77	1389.5	1697.52	1460.23	1967.95	1916.33	1916.34	1160.47	1226.79	1874.32	1556.77	1371.2	1337.59
igfals	1602.57	1527.85	1522.09	1473.72	1425.77	2162.71	644.893	714.489	946.47	1039.05	959.172	739.807	677.11	598.426	0.230556	0.475556	3.95444	0.123333	28.8317	0.136111	1.37722	21.4878	23.1828	1015.14	982.442	1285.69	653.594	665.448	630.193
mt2	1593.66	2571.76	1203.37	1919.54	2710.25	2466.15	2085.17	1445.99	2803.27	2271.5	3093.43	1021.27	1591.25	1337.03	55.7957	32.7957	81.2392	68.6936	136.344	50.2903	149.519	113.441	131.522	8535.04	8642.98	12702.6	7294.01	6552.89	6655.9
tpt1	1559.69	1627.2	1524.1	2172.6	1829.18	2545.41	1463.08	1208.48	1421.52	1633.02	1814.23	1408.01	1544.44	1314.28	1626.23	1783.02	1897.51	1766.15	1965.75	1707.42	2572.07	2104.02	2213.38	1504.09	1572.57	2298.7	1791.2	1549.65	1512.09
zgc:56622	1526.51	1348.73	1267.02	1479.24	1228.59	1590.66	785.922	840.903	1174.3	1282.36	1377.64	933.661	931.682	819.193	0.586185	1.67142	3.6128	0.474018	34.0729	0.134981	2.6673	30.1353	25.1271	679.574	692.023	995.977	734.373	662.106	636.727
f7i	1518.91	2228.88	1481.56	1736.97	1861.17	1333.7	923.143	983	1728.79	1705.12	1469.56	1094.6	1027.21	902.867	1.25947	0.48005	3.33855	0	20.3619	0.267425	2.13361	22.0597	17.3068	356.745	361.068	483.352	320.069	328.548	306.239
rl17	1516.47	1265.94	111.431	1490.29	1590.76	1487.64	1209.09	1125.73	1511.84	129.396	1847.2	1277.57	1464.36	1280.81	1781.66	1738.42	2081.58	1933.35	188.25	1915.75	2583.36	2498.65	238.944	0	0	1365.62	1183.97	32.6122	33.0779
lcat	1497.95	1385.14	1132.11	747.611	452.267	633.65	445.556	433.088	719.415	688.692	635.054	529.672	611.758	548.344	0	0.235744	0.586926	0	9.31224	0	0.520167	10.5765	10.2729	512.543	498.172	818.484	937.126	986.477	1034.81
pgrmc1	1440.88	1590.79	1591.95	1604.24	1370.23	2225.19	720.225	641.198	770.522	867.237	839.236	627.321	716.073	606.865	22.5437	13.6921	28.0368	17.5749	38.6609	21.3377	31.724	68.1089	41.6886	1579.73	1975.36	2124.38	1747.47	1884.91	1873.95
nupr1b	1420.82	1252.81	1396.78	3864.56	13560.3	11258.7	1525.65	1592.25	1237.22	931.643	804.19	698.609	880.742	732.037	121.955	166.233	203.566	87.1511	179.714	119.743	130.209	132.123	101.696	15349.3	15694.7	22378.7	7142.98	6467.74	6358.11
rpsa	1377.12	1399.2	1578.4	1192.94	1195.66	2132.67	1110.26	10.1698	0	0	0.911328	1172.76	0	0	0.093995	0.180332	1401.87	0	1763.06	0.084426	1.29745	0.487981	14.4164	3.10383	1.68315	1356.72	0.057153	1072.35	1.88792
rps12	1376.49	1477.89	1421.75	1129.3	945.462	10.5592	0.504188	1.14062	1528.71	0.644685	17.4315	1119.16	1153.77	1041.08	1.46885	4.12233	2.70204	0.366881	0.351412	2.43463	1.37914	0.638794	0.460931	0.336648	0.276348	1173.14	0.798011	0.372813	0.464039
lcn15	1353.29	1464.98	1138.67	1208.24	1226.89	1298.07	308.973	328.73	647.216	684.635	674.78	331.608	364.928	309.055	0	0	1.09684	0	12.8242	0	0.791206	13.7042	11.6282	419.99	439.656	1146.06	415.883	461.011	462.192
ctsla	1341.18	11.7068	1547.08	1505.85	1494.79	1133.38	640.345	5.82093	7.93975	1044.65	1051.79	7.1625	3.40363	3.56229	0	0.621606	0.214737	1.49162	0	0	0	0.480365	0.172034	0.422518	1998.58	2.07052	1711.92	1735.66	1.19781
uox	1325.11	1758.49	1244.31	1045.07	443.656	1468.76	329.884	353.184	417.799	487.779	484.952	310.07	386.716	331.96	0	0	0.326689	0	4.72823	0	0.198479	11.4703	10.8937	1150.19	1322.63	1806.32	1619.1	1723.65	1336.14
tm4sf5	1314.41	10.3206	11.9486	1026.22	5.74717	1345.67	1.61811	418.38	3.32484	1009.69	1001.34	0.492767	0.553234	0.467165	0	0	0	0	0.587682	0	0	0.571265	0.403327	1002.35	0.683588	10.9588	1002.25	5.53268	0.544332
gstp1.2	1304.06	13.0493	2075.07	1.58719	3.07362	1.76388	2.18136	221.649	0.50766	482.535	2.70769	2.86875	2.78688	0.708132	4.88268	3.634	2.94769	2.44744	2.50367	2.18878	114.011	4.65391	1.49064	2148.51	1.89159	1.81829	4.49038	2.23616	1.7502
fga	1261.02	1407.09	1308	2552.03	4786.98	2943.2	300.4	356.512	349.763	437.654	471.08	323.859	266.899	213.943	0	0.456391	1.05363	0	13.7361	0	0.518797	9.35046	5.0163	2151.27	2150.43	2750.65	578.84	617.016	564.471
frih	1244.78	1419.6	1502.36	1374.13	1287.44	1726.21	931.097	979.819	1563.57	1616.81	1830.47	1181.36	1320.6	1138.49	2219.92	1786.41	2409.21	1805.7	2105.86	2015.38	2915.29	2564.46	2302.65	2033.18	2092.39	3140.69	3187.7	2856.06	2906.18
gamt	1243.48	268.391	748.495	633.41	200.465	775.827	78.8582	78.8895	224.969	300.712	289.166	45.8559	129.508	114.769	3631.11	3808.52	3868.42	4077.45	3951.25	3981.04	4794.66	5467.3	4870.66	217.764	219.601	364.36	454.914	396.474	422.188
vtna	1232.04	1803.83	1459.89	1113.24	828.608	1190.08	835.21	886.899	1071.4	1331.66	1261.72	1030.28	957.534	887.915	0.558706	0.428002	2.31369	0	28.352	0	1.02393	29.5179	28.6012	516.586	526.55	662.474	508.131	516.863	508.259
rpsa	1223.96	1397.79	1372.02	1280.57	0.492551	0.648915	0.845394	0.248047	1.20321	0.508736	0.408856	3.02116	1017.47	1.73349	0.586283	0.094304	0.610089	0.80615	0	0.371349	0.758875	1.00002	0.770381	0.342714	2.40402	1156.85	0.663614	0.874986	2.59112
ppiab	1189.19	1153.54	1444.47	1584.3	1290.36	1935.92	543.025	689.773	737.156	817.357	909.912	692.724	824.489	724.147	903.169	824.864	1006.2	914.306	1177.1	952.405	1546.02	1239.26	1171.64	1429.31	1376.63	1929.46	1813.19	1488.89	1475.17
bsg	1177.81	1621.71	0.142516	158.142	40.4747	1000.55	0.407089	27.3648	2.01144	2.18679	1.52645	18.8271	0.556415	0	0	0	0.090791	0	0	0	0	0	0	0	2.36004	1292.96	0	149.519	0
ssrb	1132.58	966.997	1014.13	1353.25	1452.65	1371.88	468.477	479.209	895.325	856.791	937.812	513.021	611.486	498.761	99.1706	99.597	122.817	84.1417	106.234	87.7708	150.936	129.168	122.879	824.441	775.925	1106.5	619.264	573.584	540.874
dgat2	1113.98	4.35101	2096.73	0.220445	0.727042	0.808375	0	0	0	0.459112	0.203508	0	0	0	0	0	0	0	0	0	0	0	0	0	0	0	0	0.161812	0
zgc:174904	1105.33	1458.85	992.218	1473.36	917.893	1852.16	690.016	583.143	1142.88	1197.36	1108.56	719.943	795.393	763.839	41.9136	43.2695	70.3896	33.2205	62.9467	39.6634	57.2426	74.7407	57.0967	890.117	879.641	1264.5	565.982	637.653	604.994
cyp2ad2	1021.18	955.733	1494.66	554.679	288.197	883.292	330.471	355.374	395.778	453.172	425.568	235.573	294.556	260.696	0.921699	0.43347	2.98209	0.431423	14.7078	0.699079	1.93859	11.3833	11.327	527.88	533.111	699.531	388.878	396.464	389.708
itm2bb	1009.33	1070.99	22.4097	15.7919	3.0527	42.4172	268.177	251.763	5.23366	583.719	5.26376	2.33197	322.295	2.6073	1.23279	1.37521	146.606	131.319	1.26839	133.52	1.53126	1.41927	115.486	1.27147	645.762	0.693901	1.22189	1.56805	2.85576
elovl5	998.253	699.968	1069.59	897.28	471.524	1483.86	283.499	322.712	482.515	596.33	497.978	525.502	444.664	392.81	0	0	0	0	5.59958	0	0	10.7332	11.3249	903.524	936.311	1227.86	1314.75	1365.7	1322.57
RPL35	996.404	1141.12	906.778	1129.52	1211.5	1307.82	665.594	639.931	1284.26	1319.98	1379.6	717.256	862.175	728.631	703.48	714.39	796.123	823.986	790.161	801.807	801.755	1101.78	920.716	709.233	763.204	1089.18	782.819	700.853	752.41
igfals	991.696	1047.29	1031.42	1611.31	1905.22	2404.43	409.974	429.156	547.078	640.351	587.942	452.159	410.006	359.946	0.166667	0.132778	1.58833	0	14.2094	0	0.484444	10.6794	10.7078	806.526	803.169	1137.12	427.343	431.268	407.997
dap	987.793	1149.7	872.826	1401.89	1214.72	1633.66	227.752	275.539	369.966	400.332	431.701	342.551	327.254	297.894	12.108	18.0571	17.3025	18.9012	19.6821	17.409	26.6944	32.3742	19.3935	1015.15	952.732	1330.13	789.945	713.983	745.216
rpl21	979.835	1168.84	1128.22	1141.77	1335.47	1547.2	1042.41	1081.65	1307.65	1411.11	1694.27	1129.18	1359.24	1161.72	1453.4	1419.08	1561.92	1570.52	1870.98	1731.86	1964.07	2132.38	2126.52	848.905	866.161	1303.01	1076.06	954.374	966.747
diabloa	979.557	227.394	908.833	6064.66	7758.03	11469.2	442.257	234.142	513.638	269.81	248.164	364.075	303.003	278.777	0.915584	0	2.20543	0.42621	3.98259	0.524793	0.674734	23.1768	12.8669	1893.77	1934.53	2627.84	640.392	595.615	580.438
phyh	953.884	1072.72	1.3778	1059.51	44.7349	1091.52	455.265	37.7628	3.27745	31.1188	2.30324	1.91681	521.213	4.60972	23.4394	24.243	1.1761	14.9298	35.0992	19.1491	11.2409	40.4041	22.5244	421.436	462.172	551.482	0.912069	1.14842	1.70548
ttc36	936.53	1353.78	772.298	909.083	841.344	1054.7	345.897	295.33	325.821	387.475	496.085	271.03	338.874	310.108	3.30851	8.01773	9.22163	2.99468	24.4965	1.55142	5.43794	14.3014	15.3865	707.301	812.895	1061.05	899.559	787.582	800.528
rl31	893.95	899.926	959.436	948.402	885.404	1113.85	507.507	462.641	1133.33	1193.37	1181.45	526.294	671.029	595.63	463.578	451.526	553.354	483.059	509.691	520.033	635.427	648.8	584.475	439.917	465.339	639.827	545.883	491.762	510.31
cox6b1	885.707	1189.36	1415.9	582.954	451.579	679.968	687.794	518.878	530.475	443.319	544.563	362.425	451.385	401.41	10.8528	24.2696	72.9742	3.45124	118.08	5.35373	10.6405	15.5421	22.2505	1547.01	1664.76	2521.8	2587.97	2406.19	2442.73
rps15a	840.654	1071.15	880.16	1005.38	875.156	1214.09	760.438	707.585	1031.36	1188.03	1179.14	723.528	977.025	824.404	681.51	649.248	794.33	711.961	802.414	697.94	881.531	1052.45	944.433	575.243	677.979	1024.59	931.982	830.86	815.737
iip	806.557	412.228	201.581	1624.69	1398.73	1545.26	239.918	180.182	533.76	539.266	580.826	282.497	386.235	336.68	66.5652	43.9123	80.3071	49.495	56.0513	53.9658	47.9552	78.3046	54.8572	740.843	783.948	1091.72	142.665	114.025	153.35
ctsba	796.491	612.089	462.694	607.938	525.261	598.902	188.547	153.723	291.224	287.378	303.35	174.665	184.479	152.975	79.3795	50.898	75.4947	64.9096	75.4247	60.4786	133.645	82.3537	77.3673	336.631	362.8	466.978	392.477	394.326	381.293
f9a	762.197	710.168	499.073	580.188	458.075	601.551	205.921	252.815	318.287	354.123	339.39	286.645	261.538	239.678	0	0.201207	0	0	7.20926	0	0.401073	5.41717	4.74447	301.893	305.839	377.693	237.066	249.482	244.162
cldc1	757.4	932.265	587.964	1447.48	1212.08	1257.05	147.858	107.456	372.702	608.881	478.286	197.166	215.22	184.846	26.1643	22.9508	31.4579	13.4677	30.9438	15.4343	16.9767	38.2233	15.9628	963.878	1135.32	1356.86	461.29	530.652	531.904
rl21	756.674	689.806	695.217	761.449	690.844	977.006	573.015	527.33	603.003	677.957	773.123	628.478	718.137	615.035	562.96	568.361	581.483	617.931	737	657.739	818.084	838.058	839.924	504.366	603.593	818.019	720.997	629.833	598.493
pno1	745.277	988.755	716.834	1361.66	1711.68	2262.46	299.633	329.357	616.755	725.141	640.899	298.902	451.011	371.44	225.149	303.584	291.462	242.712	208.541	233.098	288.909	347.785	305.695	296.747	272.958	445.779	195.432	194.52	187.535
gcshb	731.753	646.438	788.613	369.27	214.059	377.579	77.158	62.8123	135.709	137.232	125.735	90.7495	88.1656	88.2994	5.71737	3.81553	3.51564	6.36138	6.12837	0.871629	12.8884	6.80151	8.53452	476.614	495.992	723.734	678.335	700.916	707.85
cox4i2	728.129	1184.75	710.783	465.641	468.846	1152.02	453.761	506.145	713.801	795.67	794.466	604.169	647.801	569.962	648.111	521.092	734.546	653.965	720.577	760.54	864.675	858.519	951.161	499.775	549.533	818.516	728.431	745.498	808.812
cebpb	713.669	840.352	481.975	731.348	704.669	1245.13	176.501	148.51	368.608	338.023	468.76	201.93	247.381	219.378	8.51805	2.74723	4.71639	3.99556	13.1941	4.06403	8.9072	12.0327	4.56115	785.821	831.593	1122.31	386.385	372.177	348.343
defb3	712.405	866.922	925.126	559.076	551.646	684.887	537.201	575.897	765.847	783.47	709.029	535.721	613.652	547.365	1.92453	0	2.99161	0	22.4591	0	0.578616	34.1719	26.1258	946.736	990.777	1389.03	1649.06	1477.21	1489.2
rl29	699.924	921.537	650.577	655.632	707.536	867.894	478.925	546.733	892.585	939.746	1011.87	626.217	712.937	612.583	696.794	607.57	806.505	802.356	839.195	662.68	907.437	977.626	910.079	634.181	706.009	1014.2	879.436	678.539	740.943
smim14	695.382	434.088	419.168	553.575	491.244	407.282	0	30.8466	0	50.8273	67.003	0	35.0576	42.2417	10.5297	0	0	0	0	0	18.8738	0	0	77.6859	79.4887	103.283	39.3296	31.7634	0
rpl39	682.9	651.288	637.309	474.751	545.412	449.358	870.509	780.815	1401.8	1520.68	1465.38	940.849	1059.39	889.297	647.501	616.096	821.907	760.293	756.291	753.89	803.323	1045.29	957.677	402.723	453.178	741.13	649.707	536.307	588.77
endouc	677.318	875.895	910.13	539.49	296.972	584.195	281.012	248.405	373.026	398.83	387.65	268.121	274.456	253.598	183.602	161.294	258.731	159.823	180.196	171.2	183.195	225.452	160.618	310.321	325.531	497.846	327.851	369.668	369.091
metB	664.098	2190.89	833.661	3334.49	3561.54	3941.94	308.404	448.792	346.238	279.945	345.044	211.085	219.107	198.407	103.481	79.0546	96.4672	80.6393	146.552	108.35	92.1448	116.128	105.623	5945.42	6379.33	9219.61	1945.13	1869.76	1836.64
atp5mc1	660.41	511.561	821.678	461.641	367.898	526.125	334.676	361.217	561.895	587.376	560.565	329.877	408.434	331.19	631.593	796.322	1111.99	692.829	1110.43	868.997	1132.09	1108.63	941.011	692.296	659.037	1064.22	877.06	811.242	808.721
SCARNA10	658.759	441.164	648.649	780.729	734.853	888.087	916.809	927.679	877.525	900.56	935.624	916.662	1052.44	899.98	1.8796	4.2709	2.98328	2.32776	3.22408	2.01003	2.65552	3.59197	3.01672	1.16388	0	2.55184	0	0	2.2709
elovl5	646	576.856	863.688	947.46	566.134	1299.49	180.795	196.024	285.571	336.283	299.142	294.036	290.479	245.624	5.38239	5.48384	4.63099	3.50836	4.10814	3.04571	9.9476	9.48272	8.86511	306.407	295.649	363.96	471.059	482.846	473.308
minpp1a	634.606	695.641	670.296	1053.39	855.375	1070.46	306.215	291.108	374.094	443.699	403.692	316.101	279.892	248.96	2.92535	2.62359	6.29674	4.74529	13.202	2.81368	3.38143	13.9667	11.2742	512.968	483.335	648.493	692.274	713.651	690.88
leap-2b	624.286	290.274	951.283	22.2917	4.37904	45.3895	7.15546	14.152	67.8236	95.3293	79.1694	96.3371	107.514	102.008	0	0.486463	0.50131	0.483843	1.69258	0	0.730131	1.28122	1.52664	202.709	250.317	296.139	3611.47	3737.34	3721.59
creb3l3a	621.301	591.24	368.8	917.122	640.716	1916.28	189.794	202.932	563.571	624.127	642.321	457.629	519.02	448.388	0.494513	1.09808	1.13169	0	25.2534	0	1.41358	17.6348	18.7205	430.588	423.612	558.696	226.369	226.457	198.064
phyhd1	580.204	619.55	721.726	559.443	322.466	604.191	164.417	176.849	320.088	355.812	306.508	186.31	232.776	187.502	1.48441	1.70384	1.76319	1.41607	5.21583	0	1.11391	3.78657	6.28417	343.737	370.98	500.031	415.713	400.248	384.763
rpl6	556.694	590.395	566.051	614.487	699.292	673.539	475.853	516.536	523.506	625.286	765.093	566.863	593.409	526.947	1162.34	1159.58	1246.49	1288.37	1503.91	1327.17	1712.63	1526.29	1637.62	747.386	742.818	1079.67	963.59	811.232	842.801
rpl35a	555.645	684.202	546.845	620.275	747.182	719.507	849.803	960.84	1311.65	1284.01	1684.13	975.778	1076.52	962.248	910.18	919.177	1111.48	1016.22	1053.77	993.383	1297.21	1414.21	1321.78	1079.3	1186.98	1597.93	1489.8	1241.59	1249.97
rplp1	546.027	889.164	681.971	469.18	555.531	573.142	477.338	389.767	723.928	514.844	688.828	495.406	424.324	362.097	474.56	403.444	360.033	388.731	596.096	459.533	530.07	374.079	569.074	287.824	282.041	426.365	373.666	344.706	363.815
si:ch211-117n7.7	543.827	153.067	148.04	0.380285	0	0.349269	0	1.3222	1.15017	1.87922	277.336	0.515502	0.718127	1.53336	0	0	0.109955	0	0.196464	0	0.446648	0	0	2.74048	2.35648	117.379	2.10366	1.17083	2.12956
gpx1b1	543.61	1243.91	584.807	264.895	167.379	514.725	106.422	70.9235	104.08	149.381	167.056	90.9378	108.671	87.5617	4.23242	2.50357	5.05607	5.62181	12.7513	7.27115	14.5341	9.24873	9.69725	799.416	857.091	1263.78	836.705	729.718	807.717
sec61b	539.064	464.151	512.777	1075.82	1318.96	1279.68	570.441	536.226	934.262	975.905	1096.33	634.633	677.011	572.838	54.2341	46.5424	63.7371	52.5487	75.2407	60.9307	92.0683	70.2878	55.745	727.699	706.965	1025.3	532.106	471.938	480.245
si:ch211-262h13.5	527.181	539.092	632.053	744.476	454.427	716.039	121.812	129.881	137.044	155.178	160.016	130.544	128.567	114.871	0.197751	0	0.834432	0	5.38155	0	0	4.76929	3.46413	413.562	437.503	544.99	404.905	420.129	380.539
romo1	525.539	596.819	627.708	519.955	397.962	576.244	135.919	138.082	242.435	220.04	259.918	127.814	171.333	151.38	225.583	149.452	253.727	174.805	213.022	210.438	224.203	271.54	251.047	393.22	438.284	600.887	489.934	468.889	472.312
cox7b	524.155	1031.75	987.701	617.15	419.582	673.59	211.018	245.363	342.23	352.135	349.806	230.274	336.441	315.46	125.96	65.6055	150.014	91.1456	93.3228	82.6006	136.068	114.584	130.108	372.278	420.306	617.002	559.403	519.056	447.395
rbp5	519.282	32.3484	500.996	310.614	21.4471	12.2828	118.456	125.259	1.505	254.756	1.71964	213.825	189.956	154.151	11.5802	1.66521	13.6494	0.629154	2.09104	1.24247	2.3115	1.39901	1.7854	2.19635	1.5805	1.7458	1.97667	2.08509	2.02247
smim14	509.751	504.816	316.465	416.068	428.495	383.205	44.8825	0	65.7227	62.6933	100.096	45.8342	0	49.5724	11.6325	4.0724	8.91667	9.90164	15.7773	13.6207	24.8497	0	13.6913	72.2734	50.177	87.5845	29.3798	33.9718	0
asgrl1	503.424	440.689	437.452	366.959	291.881	438.369	87.8238	101.652	130.049	144.988	142.059	104.47	102.81	99.6492	0.264966	0	0	0	3.37488	0.588813	0.751717	2.76693	2.47694	305.179	303.492	401.059	327.745	339.338	342.753
ndufc2	484.936	741.957	481.554	421.866	472.99	457.815	98.4638	96.2017	126.854	177.506	190.332	82.0845	143.134	108.591	218.999	206.702	270.254	173.973	247.781	183.703	253.154	255.389	208.467	205.103	207.593	334.98	237.724	220.662	206.152
gstr	482.136	813.422	782.951	761.185	488.365	538.379	291.43	229.05	290.632	319.805	345.432	290.734	261.861	252.859	56.7726	49.9854	60.8692	45.268	79.6948	53.7461	79.7283	94.0779	66.3277	725.68	732.024	1067.31	1442.84	1291.47	1308.9
sqstm1	479.988	13.5767	349.539	1194.28	1116.89	26.3099	2.79338	1.04307	33.3286	19.0995	41.2642	184.877	361.366	314.413	1.70684	1.69948	1.90538	1.18769	1.29909	0.992989	1.17181	0.741821	2.23819	2760.5	25.9238	3760.19	373.936	2.26186	2.14547
mgst3b	474.54	1065.47	1009.3	754.011	565.412	705.273	499.198	449.764	779.285	735.189	809.992	557.153	601.515	543.602	67.3788	54.8442	59.5152	51.0996	67.0411	43.189	80.2771	75.8799	62.4156	852.26	914.109	1273.58	1093.27	1152.29	1237.04
creld2	472.815	416.1	408.354	851.266	661.539	626.085	75.2856	61.6793	97.6929	108.091	102.454	93.8703	108.082	96.9246	32.154	17.8113	25.2037	23.0463	27.1874	26.7542	35.5932	29.7327	30.5197	211.484	228.919	301.502	168.684	168.681	156.689
laptm4a	472.259	146.348	244.968	12.7291	11.8748	17.8273	0	1.23618	0.461237	1.67861	161.342	1.00477	0.170703	0	0	0	0	0.169133	0	0	0	0	0	247.656	1.10139	1.19363	0	0	0.583825
dio1	466.095	598.643	559.893	528.73	245.918	450.519	63.106	51.4487	51.3699	60.4307	56.8038	50.2751	64.4307	55.2773	17.8377	13.9605	22.3743	13.0665	21.1657	13.1499	23.0372	31.0248	24.6505	307.911	339.829	451.653	325.366	356.605	358.773
hsd3b7	461.283	487.136	373.27	844.434	1197.24	2468.82	83.5711	83.0682	174.261	184.716	204.448	94.5855	105.188	90.3952	3.41766	2.72295	8.34001	3.04786	5.67369	5.02091	3.33645	6.6703	5.04965	164.684	158.925	214.943	115.69	124.66	118.523
sdr16c5b	460.435	339.879	416.761	474.449	301.626	620.555	274.614	280.074	404.507	454.399	369.093	373.128	365.84	317.822	0.962099	0.613703	2.0277	1.01555	8.58746	0.888854	3.18513	6.81536	11.8925	341.537	338.874	477.639	503.107	514.865	500.255
ifm3	457.84	419.734	194.059	1235.81	719.06	1257.88	118.197	115.623	294.818	399.302	455.305	304.372	231.557	204.865	11.3587	17.6297	25.025	16.2723	40.9891	14.2509	24.8381	17.1003	28.613	414.399	413.979	624.364	47.1908	61.8305	49.1247
si:ch1073-291c23.2	456.247	360.804	394.076	377.124	305.066	2.06729	191.542	13.9048	271.576	15.0374	270.663	1.94162	192.494	166.161	0	0.387946	0	0	1.26614	0.820728	0.344986	1.37975	3.17633	298.419	287.104	428.535	310.37	331.776	2.77394
si:ch211-93g23.2	453.76	493.295	430.966	473.022	333.29	845.093	119.848	69.3597	260.469	170.868	249.719	71.2893	117.023	71.9839	0	1.04275	0	0.405204	5.03996	0	0.655514	2.78439	2.47893	321.224	294.877	465.003	297.114	294.039	288.623
npc2	450.787	581.476	396.617	640.131	578.14	551.574	160.85	185.304	231.125	282.355	281.82	201.516	236.613	210.871	62.7988	47.5825	60.3001	49.6823	46.4272	50.2909	88.5653	63.1205	57.4603	324.348	361.283	434.764	302.286	306.945	285.694
ociad2	449.769	16.5217	751.16	161.84	1.07343	195.051	0.797411	0.174408	160.234	127.189	172.116	2.17882	0	0	0	0.480021	0.256059	0.102264	0	2.44233	0	0.152211	0	0.736343	302.885	1.03535	0.642106	384.186	395.606
cyb5a	446.356	449.518	459.949	555.616	617.719	759.606	330.022	293.139	507.171	497.626	540.78	306.246	381.246	354.587	10.7218	4.29498	16.4623	7.91841	15.2699	6.80335	23.7008	19.5084	18.9728	862.746	943.189	1183.81	831.633	838.655	905.839
mydgf	429.058	492.414	493.476	590.66	511.762	808.946	62.7976	64.4297	99.7608	117.463	135.973	94.932	99.1984	94.466	27.0845	18.4138	25.0023	22.504	20.0306	29.8577	44.5108	25.8396	23.6797	322.952	303.349	471.45	181.775	204.562	184.513
hao1	427.126	417.873	503.032	264.858	135.499	299.965	113.616	124.388	219.867	252.696	266.106	129.582	125.954	97.4101	0	0	1.57435	0.169935	5.70833	0.118464	0.751634	3.29494	5.30147	143.389	144.938	206.873	173.9	166.241	159.755
kdelr2b	425.495	525.969	569.452	630.176	438.79	436.759	159.839	165.245	247.555	328.845	319.182	217.503	174.335	170.235	42.0258	39.4617	48.216	34.4413	41.7473	43.2809	59.3662	40.1643	47.3693	241.086	246.015	347.415	180.816	195.256	149.968
ppdpfa	423.719	221.934	375.428	1663.57	2628.23	2397.06	22.2679	18.6404	205.122	128.935	157.537	39.1146	107.647	99.5487	1074.03	794.436	1099.22	853.276	868.271	1010.91	748.7	835.52	875.765	1329.58	1393.61	2143.89	199.814	228.438	166.189
myl12.1	420.014	423.034	417.408	411.327	309.818	338.455	134.99	144.684	180.156	225.024	225.135	152.47	153.062	136.98	399.17	294.957	414.639	284.869	370.206	312.668	421.267	360.647	301.492	508.669	507.694	744.701	742.261	687.791	654.967
cebpb	418.499	403.801	317.631	385.459	386.295	499.371	98.0936	86.6803	184.336	203.552	218.633	134.232	150.422	124.208	11.3986	4.63255	5.90936	5.61209	15.3577	8.59844	15.616	9.39669	7.18713	525.987	502.211	719.585	272.824	242.597	231.881
fuom	418.272	468.869	441.621	363.794	317.374	335.725	130.303	127.674	224.375	249.54	252.623	203.476	187.618	197.02	10.9312	4.60968	13.6677	6.23226	17.971	7.78064	16.6007	14.9806	9.95054	522.528	514.922	739.911	500.944	454.719	496.838
leap2	416.431	521.2	656.398	357.165	183.65	580.725	52.3382	42.0235	50.0035	66.8558	46.5908	23.1008	22.3416	21.1884	6.17805	36.893	42.8778	7.4893	42.2954	9.86404	16.5487	5.06556	3.21256	232.701	231.867	306.345	478.558	526.899	508.228
serpinf2	414.335	429.818	453.78	564.538	583.146	762.381	231.862	263.199	356.178	449.172	419.096	246.788	229.771	200.889	1.37474	1.78158	2.9779	1.10368	15.3374	1.55158	1.04053	10.0537	11.5021	246.514	235.091	311.294	87.0342	90.9537	91.5582
ppap2d	412.411	317.558	397.437	260.185	132.786	236.555	104.166	84.9228	117.339	153.96	179.447	63.2174	82.3298	69.5602	15.0605	15.4745	22.67	13.5105	20.5231	13.0721	12.4956	20.752	13.8354	208.917	200.648	254.701	79.0669	75.5655	80.7945
nupr1a	410.671	434.026	231.662	293.38	182.842	557.966	176.991	153.773	199.389	142.017	120.397	134.073	180.709	146.35	1460.45	869.282	1672.7	907.791	986.38	1090.41	1358.06	1584.38	1204.97	598.62	652.417	906.59	392.265	413.526	383.521
tpi1b	407.476	433.611	622.529	301.508	281.661	308.912	263.453	263.456	220.136	235.538	254.928	109.746	117.205	108.818	9876.43	15442.8	12069.1	12638	15953.9	14257.3	21020.3	13748.4	22141.9	425.17	412.025	576.225	902.878	886.454	814.56
id3	404.811	496.164	293.788	214.433	56.5361	268.187	49.174	41.6997	91.5902	53.331	81.7311	37.4528	69.8107	56.9551	4.69893	5.18587	11.5664	5.5914	5.82412	5.78956	6.17588	9.37865	7.17819	33.4677	31.4604	47.1248	65.2519	62.7067	50.308
pfn1	397.493	359.321	530.483	301.024	86.567	172.932	77.3324	86.8729	95.0251	122.105	134.25	107.395	133.96	112.99	287.247	121.881	180.432	195.827	147.649	150.473	573.907	182.826	189.636	93.8673	96.9022	157.235	119.564	92.7779	94.8073
mcfd2	396.284	385.947	298.925	703.801	713.27	634.585	112.508	116.911	163.28	197.848	192.331	154.465	161.723	150.887	1.50662	1.96247	1.91832	2.32561	3.90949	3.81788	1.96689	6.02318	6.00993	235.619	247.884	311.306	181.443	186.039	172.343
map1lc3a	390.639	385.449	468.553	304.115	285.962	347.649	91.2708	87.9181	101.917	110.575	102.026	65.9139	78.4347	68.5819	98.7375	81.1375	119.801	80.8792	113.658	82.3181	123.792	111.169	86.5208	133.654	165.581	232.815	187.743	178.185	166.047
atp5pf	379.888	540.001	554.229	467.275	380.966	494.329	205.083	227.756	238.831	360.143	293.366	242.46	307.986	295.391	541.926	529.863	817.739	461.267	618.232	480.458	647.264	751.565	677.19	504.141	459.617	748.878	764.644	690.812	802.939
ncoa4	375.123	403.38	396.584	699.674	1350.61	1059.58	169.53	176.247	150.516	281.732	279.124	212.25	111.124	109.773	41.4697	37.5443	49.5439	25.2313	33.8254	30.5384	39.0193	42.1976	34.2489	748.458	779.999	1016.16	765.399	767.448	737.824
RSL24D1	367.07	653.289	388.122	637.942	473.616	845.104	127.303	111.991	146.065	176.516	191.939	131.664	176.284	132.197	212.489	224.863	249.056	191.209	190.633	190.701	212.483	290.926	192.324	272.459	259.351	373.261	331.636	278.724	289.766
cdip1	365.325	222.669	268.151	372.82	352.568	495.597	54.9856	51.6603	154.204	144.683	189.683	69.0481	65.9679	51.8638	7.08253	4.85256	7.5625	3.08093	7.35497	4.41186	7.96394	5.3734	3.89583	147.715	164.805	222.87	93.9696	101.338	94.8349
sult6b1	363.607	199.533	225.339	204.381	92.8026	188.034	61.6624	54.036	111.747	127.712	107.037	86.9763	109.802	119.917	1.0425	0	0.204355	1.17295	2.20059	0.587102	6.06826	2.87647	1.21525	165.043	155.477	248.97	432.26	434.72	436.386
fabp3	363.568	108.437	255.69	80.1205	203.849	199.077	34.2364	54.9593	54.9782	54.6273	100.617	68.9955	46.2154	53.3675	1197.48	955.95	1605.1	856.05	2193.57	1283.51	1591.02	1273.41	1388.34	323.703	324.314	483.254	510.852	395.355	401.413
tpi1b	361.103	367.296	450.281	601.868	675.732	1153.84	138.496	122.522	82.4097	73.1932	71.2596	54.2057	55.0087	48.5024	10908.2	18949	14942.2	17099.4	19025.1	18766.6	25860.8	17613.3	27487.4	401.125	411.431	548.123	386.55	327.123	342.596
sord	360.996	470.539	570.746	319.519	298.685	330.164	150.209	137.569	201.304	219.226	218.12	175.635	203.447	174.046	0.528201	0	0.476276	0.463742	5.05998	0.606088	3.21934	5.0376	6.89973	318.702	323.193	451.999	555.53	535.371	523.612
angptl3	360.124	500.281	962.109	227.851	124.022	535.391	206.058	153.044	245.179	224.673	285.585	171.1	152.541	145.654	1.96265	1.71459	4.64623	1.69626	4.67653	0.941508	0.593376	2.31642	2.26709	633.906	649.022	771.229	567.576	571.394	564.966
si:ch73-352p4.8	357.549	443.816	465.375	398.361	180.837	365.812	167.407	183.567	236.996	243.327	234.092	183.799	197.309	170.959	0	0	0.411123	0	4.69439	0	0.268711	4.39449	4.64241	25.7074	22.6078	35.8443	57.1705	52.8313	39.5644
fkb1a	353.846	312.59	412.413	298.919	338.09	300.045	124.964	111.678	253.889	232.472	278.327	146.703	149.751	129.933	194.741	124.102	205.591	162.509	172.963	155.98	290.594	208.077	167.874	183.882	209.54	271.233	262.639	239.911	268.478
INHBC	345.464	325.944	390.683	425.245	607.462	844.115	18.008	12.8632	16.2399	13.7246	22.1346	15.1903	9.38097	8.78091	0.806304	0.183599	1.08507	0.710526	0.630355	0.608017	0.350673	0.982558	0.666157	246.19	269.218	315.003	110.961	100.972	114.471
zgc:64106	342.94	507.803	420.617	327.468	313.651	494.108	115.24	94.179	161.585	229.619	235.981	134.707	105.189	91.8909	0.825103	0.229424	0	0.225309	3.29527	1.22737	1.79012	3.90535	4.93416	252.11	255.252	328.797	402.297	409.483	415.729
rs10	339.463	407.152	320.255	336.243	342.929	325.771	380.62	409.369	380.152	475.165	569.173	430.604	536	426.533	439.293	395.029	473.89	414.256	471.456	453.769	543.958	574.927	507.037	297.522	301.3	488.318	406.804	356.443	370.937
rgrb	336.912	330.341	393.03	365.956	270.999	427.734	98.9937	101.641	133.572	153.419	132.225	118.565	115.701	101.446	1.30068	2.03322	1.62106	1.49493	2.79279	1.0777	2.51971	4.25113	3.4009	146.241	151.572	174.958	139.22	149.719	136.887
cd59a	332.073	467.138	223.497	389.23	551.743	1050.91	128.09	117.244	154.211	136.082	106.312	147.568	211.539	185.478	312.572	289.734	391.929	292.28	301.765	338.577	328.144	438.982	396.266	560.653	571.583	790.037	891.565	949.389	969.319
selenbp1	327.104	342.52	502.2	323.615	247.114	294.038	102.887	89.6767	137.433	144.522	146.886	81.7404	115.874	87.2305	25.5925	19.8249	47.1596	18.2979	31.7112	23.7442	41.3767	37.6778	29.7083	354.438	351.418	493.876	426.89	384.579	392.079
bccip	325.417	33.3443	105.68	184.957	639.256	606.088	251.283	285.519	61.1051	608.11	53.5809	19.4748	361.234	309.606	189.919	218.127	1.07365	10.682	15.0359	234.747	25.6039	18.274	2.70208	10.6522	10.656	14.5921	266.499	20.9767	246.16
h1-10	323.22	379.998	273.621	566.145	445.585	619.492	158.903	123.197	243.275	200.303	219.109	156.708	209.646	169.901	241.309	217.492	228.344	197.805	249.424	210.231	255.381	278.855	211.781	223.544	217.85	298.359	401.694	416.504	392.764
GLYCTK	322.044	376.385	360.503	279.275	187.177	260.654	95.72	91.1843	184.234	187.443	191.605	122.895	121.948	116.296	7.42944	4.25789	6.17045	6.8705	9.50304	4.32319	7.01162	7.88821	6.42557	181.344	197.009	245.785	240.691	244.382	237.977
cd74b	320.881	184.762	379.451	174.831	54.2285	118.293	95.2906	88.4587	118.828	154.181	169.378	116.651	151.414	124.028	124.429	104.134	126.074	101.984	103.921	130.895	269.351	87.3428	118.652	63.7057	78.7347	106.941	76.2497	62.8935	64.6187
ccl19a.1	319.824	24.2115	140.524	84.7917	36.3304	88.2202	16.8036	24.2292	8.05357	7.94345	5.98214	30.8958	25.9851	11.378	1.50298	0.723214	0	0.568452	1.17559	0	1.36607	0	0	7.32738	7.66071	20.8318	1.30357	1.75	5.3006
UQCR11	316.956	571.675	450.851	455.934	440.167	513.145	99.4276	91.4123	132.719	126.684	166.41	108.706	142.741	126.768	198.579	151.329	221.458	154.469	190.265	178.346	214.971	206.338	188.215	190.847	204.908	252.357	236.237	275.149	294.32
tob1a	316.652	403.123	543.844	760.098	1193.54	1749.23	131.761	93.2204	155.856	159.832	159.903	77.4433	69.3506	58.8762	193.053	143.095	158.098	139.643	121.884	111.01	87.967	76.3713	50.9241	234.532	241.315	296.393	151.801	152.555	130.065
sord	311.652	1.28005	0.280786	0.707066	0.478687	0.811709	1.06123	0.784681	0.958615	0.869422	1.09465	117.37	114.685	101.791	0.159608	0	0	0.298577	0	0.041448	0.377371	0.348738	0.298739	236.461	218.889	11.1778	331.696	314.314	301.97
thap7	311.44	272.157	128.59	241.078	216.215	205.182	1.19264	0.75286	124.783	132.892	149.166	2.19337	1.87887	1.59563	1.74214	1.63372	1.55335	1.26464	0.713483	0.943585	1.84116	1.89687	0.805352	1.76701	1.55508	2.19859	2.11741	2.18083	3.70684
MPC1	310.451	407.993	356.27	439.101	104.679	445.271	118.552	12.9437	125.173	143.252	131.398	11.3105	127.742	15.4132	0	0	145.774	0	100.097	0	0	5.66607	10.9352	214.574	0	334.135	18.3294	16.8913	18.4278
si:ch211-1a19.3	306.746	226.256	327.898	225.528	88.8866	183.718	53.6933	53.0837	76.7747	85.9825	90.5419	55.3204	50.3988	47.2884	65.632	58.9094	90.3212	56.8584	72.9962	72.8535	64.7344	84.0578	44.7679	110.557	108.68	138.736	126.823	120.772	119.804
xbp1	304.232	329.207	425.57	473.884	338.561	588.684	71.8263	67.6558	165.255	151.287	184.093	76.8646	64.8244	60.7989	35.7714	63.2375	52.1418	45.1814	50.0779	45.6309	65.7797	74.5358	51.2011	294.745	302.528	442.153	177.639	192.118	189.238
sec61b	303.936	259.493	283.324	527.274	783.35	993.579	275.556	288.57	418.994	486.365	498.531	321.815	323.81	284.887	91.0743	76.2818	109.385	70.9194	109.995	80.748	145.537	123.661	109.472	1020.87	1037.22	1448.78	754.589	675.896	632.904
spcs3	303.103	269.461	227.902	304.665	321.008	271.319	92.4351	110.839	142.059	143.589	137.151	129.05	132.042	131.59	33.1242	21.4321	27.659	24.3385	27.1363	30.5312	40.3501	32.5986	32.4175	139.332	176.311	249.188	144.174	158.361	168.832
cox6a1	301.386	360.224	430.749	280.905	406.478	352.851	142.965	124.905	173.109	229.124	213.933	162.716	221.665	167.692	38.541	49.0754	43.8448	45.6474	53.4102	45.8869	109.834	51.7627	45.694	159.656	159.009	201.418	237.625	236.188	256.337
psmb9a	300.572	190.752	243.781	84.5249	33.7182	98.4894	20.3469	18.3104	30.0064	29.5064	29.2177	26.1176	16.0466	16.92	18.8851	9.5625	7.47458	13.4931	9.08845	7.71822	46.7643	7.14036	11.6743	13.1981	12.2489	15.6303	10.9529	14.5932	11.1229
si:ch211-93g23.2	300.269	343.644	289.473	99.5061	193.186	577.329	101.209	58.477	205.542	179.318	222.013	103.84	76.0164	93.5541	0	0.314545	0.418182	0	4.30818	0	0.250909	2.2897	1.75455	277.916	321.64	433.684	246.28	235.528	232.047
igfbp2	300.093	313.534	391.407	182.432	207.014	297.775	82.6053	70.6939	119.981	138.675	151.006	96.6785	83.0175	74.9652	1.03293	0.776529	1.69603	0.26712	4.05619	1.04443	0.805018	4.30005	4.24517	329.866	321.523	413.031	331.105	337.002	333.925
zgc:162730	298.262	210.322	413.912	773.242	543.754	811.096	100.406	63.7844	106.101	96.2194	109.517	69.3848	84.6341	70.711	21.2053	13.2744	20.331	14.2247	15.6881	17.4517	25.9551	23.4312	12.1154	217.724	231.956	293.811	103.8	109.558	101.057
gch1	297.233	304.486	365.337	247.151	119.27	304.146	60.3411	58.1951	94.8256	104.579	89.6977	64.7235	76.2926	74.3837	0	0.286822	0	0	1.25452	0	1.38114	1.69767	1.13049	82.1279	81.2037	90.0168	207.678	178.193	191.881
TMEM97	294.928	303.762	361.52	348.117	404.151	700.214	134.935	157.642	206.675	206.687	226.106	260.14	185.581	191.049	10.6015	6.27002	9.95903	3.35195	15.5363	3.39292	15.2384	18.7542	9.71322	321.014	316.582	400.197	468.365	508.339	445.247
st3gal7	294.803	342.064	320.909	362.743	288.912	422.01	144.166	158.754	208.784	215.619	228.212	162.862	148.025	132.48	0	0	0.309106	0	3.9858	0	0.639933	3.2147	2.7452	195.836	182.022	237.963	218.335	222.467	204.401
prr15la	292.238	330.056	300.253	454.475	702.207	846.423	57.6327	44.3549	117.944	138.355	152.003	66.8395	75.3056	59.287	0	0	0	0	0.592593	0	0	4.0679	3.64506	246.269	249.127	350.951	139.599	134.633	143.114
atp5po	290.722	378.01	383.526	267.941	176.501	272.907	117.369	142.087	248.639	277.79	237.053	162.048	172.665	146.15	246.812	195.176	297.241	159.042	264.623	213.549	322.524	243.967	260.097	208.451	216.929	344.08	347.45	343.196	338.517
zfp36l1a	287.579	285.71	351.71	155.642	31.3092	115.825	57.0692	48.9498	74.1556	81.1643	89.7653	39.1362	34.2724	33.6048	20.3214	16.6006	24.6208	16.3016	18.7432	13.41	34.8456	21.2214	15.3743	47.1704	52.4625	62.5934	57.5333	62.8121	48.7585
tmed10	286.784	166.828	0.428917	0.069707	0.072696	404.037	0.168029	0.039828	0.188122	0.244243	0.031708	0.48223	0.128742	0.136794	0.11535	0.029209	0.115437	0.120029	0.032347	0.162059	0.029477	0.029154	0.036638	0.027437	0.032701	18.9619	0.132345	0.028756	0.160427
qsox1	286.11	117.81	208.142	208.359	103.097	170.936	19.9882	49.5337	189.292	1.13037	0.816038	39.7393	26.9057	16.4085	0	0.476279	0.497427	0	0.615509	0.260572	0.416792	0.719446	0.564434	19.8194	6.02102	11.2459	0.165129	0.271794	7.95742
ran	283.645	144.837	121.293	11.5801	14.1602	10.2359	171.256	1.45761	1.32777	2.17709	2.29937	191.164	196.647	1.37636	1.96103	2.07441	1.90611	217.16	1.48495	206.751	10.4824	1.48633	1.76662	213.873	203.779	143.834	277.019	101.775	2.03755
tob1a	283.506	266.615	263.112	362.045	686.591	1303.28	67.9014	48.9709	101.592	114.339	94.5858	37.7337	44.9502	28.4226	92.8728	56.036	106.387	70.3476	66.9803	63.4729	39.8052	31.4887	23.784	85.4112	91.4936	114.911	66.465	70.1075	58.4413
tmem258	283.013	130.488	249.806	457.983	550.625	259.467	202.542	235.3	353.112	375.731	371.458	242.904	311.173	249.383	87.6875	107.438	121.192	100.492	121.283	133.254	139.181	146.387	146.683	424.446	432.346	626.838	412.288	353.475	409.458
s10i	281.122	408.842	342.674	271.223	137.687	203.753	83.2228	67.9262	78.2273	82.0856	110.732	95.2432	97.0615	71.5294	992.526	326.767	707.85	752.234	472.252	606.281	1902.89	753.662	627.78	69.7704	65.0084	95.6059	99.3523	82.623	89.4939
SCARNA6	280.572	299.859	376.007	345.428	450.472	336.621	1425.96	1844.06	1676.49	1469.4	1693.12	2142.46	2043.57	1676.7	0.843866	0.717472	1.10037	3.56506	1.42751	1.62825	3.94424	1.71375	0.806692	5.38662	0.356877	3.37918	1.37546	2.28253	3.69517
JUNB	279.586	187.838	141.981	1085.5	1155.63	1945.83	49.3119	19.9915	105.632	87.6761	120.627	37.5363	48.4144	45.3214	21.1945	9.24876	14.3075	12.8856	14.3741	10.2254	28.9716	13.8527	6.19204	146.628	135.285	179.098	10.6199	11.6955	12.2423
igf2b	278.405	483.363	556.285	227.736	107.374	362.744	83.6585	76.472	98.0499	89.8117	106.34	72.9299	69.268	58.3835	4.91331	5.29335	5.52277	2.76532	7.11909	2.31261	10.5718	8.89142	6.31349	58.9046	57.366	60.6743	75.1524	68.7469	72.8363
gch2	278.306	401.91	290.408	112.918	108.369	155.347	48.4707	49.6198	61.1545	62.6696	66.7782	79.0384	73.4906	69.6854	1.05917	0.496822	1.86766	1.02421	1.99376	0.532292	1.29463	2.66934	1.66456	118.177	152.359	166.881	208.159	217.627	212.816
spcs2	276.132	223.279	19.1843	34.6236	0	33.9563	0	42.3956	19.6897	142.486	133.142	14.0114	0	10.2405	9.04419	5.16606	13.1422	4.12197	0	12.3712	19.1833	7.03243	0	243.912	216.451	314.958	143.743	12.8709	0
cd59a	275.913	370.181	476.235	306.558	272.767	315.398	94.2622	83.0699	164.612	156.551	166.017	112.938	130.502	119.127	57.0845	50.7617	72.5973	44.6646	66.6027	56.8761	72.0529	77.7902	70.0273	284.507	317.515	372.715	282.424	278.136	298.469
prozb	275.703	271.617	147.855	355.716	180.785	364.974	178.494	159.233	223.951	334.111	306.873	152.53	201.473	166.479	0.358557	0.032842	0.735674	0	5.38293	0.050737	0.622529	7.1585	4.34125	181.15	216.141	252.638	206.614	216.752	207.448
rplp2	275.09	125.071	148.548	137.596	148.708	171.673	213.923	210.193	128.002	116.674	2.68354	223.811	260.113	227.36	248.45	245.713	110.953	242.746	110.564	233.167	0	118.131	109.149	0	0	0	0	0	0
itm2ba	274.548	426.261	374.3	231.829	119.675	270.645	108.373	102.505	149.415	171.795	199.583	106.76	118.475	109.728	118.976	123.687	191.93	108.2	124.417	132.31	157.04	182.966	119.925	167.954	183.784	240.419	201.312	214.155	211.838
cdab	271.121	344.046	254.736	186.303	592.781	1007.11	86.16	77.449	122.883	220.187	235.164	160.162	126.312	119.837	7.3306	1.95897	2.75733	1.35053	8.449	2.62837	3.23212	4.87456	4.56858	1258.03	1300.17	1752.34	896.136	824.227	875.656
c4bp	269.731	299.438	280.281	505.856	578.605	549.445	84.5636	63.1251	123.1	138.775	114.14	64.2508	63.8487	74.5916	37.3747	35.3205	40.1324	33.382	34.9375	29.8022	35.0399	38.1074	26.9036	139.704	141.961	199.502	98.7931	116.916	99.2121
ndufb2	268.269	323.872	350.942	261.491	229.078	331.717	104.953	85.9843	128.28	149.525	136.494	80.0404	98.5359	69.843	174.287	120.122	206.054	122.544	211.36	130.874	218.052	218.511	176.743	165.979	175.267	253.147	215.98	191.109	195.886
fahd1	263.724	231.671	241.9	236.914	186.102	231.956	62.8721	43.4543	89.4916	87.9406	90.0601	53.417	63.9703	51.0517	17.5388	11.4619	19.5761	12.7519	14.0662	11.0167	29.4749	22.4772	11.7626	121.123	123.424	185.488	170.019	189.257	190.264
ndufa4a	262.814	321.335	394.279	328.5	270.619	370.57	125.321	134.535	173.09	197.442	200.3	130.931	163.444	128.159	464.26	405.914	601.967	386.139	554.331	416.108	538.341	536.895	549.147	498.802	495.122	730.637	669.95	622.658	608.912
ldlrap1a	261.483	307.13	19.8077	113.223	115.959	133.358	103.456	22.9144	115.08	104.857	147.117	26.6224	45.931	36.9694	1.32963	2.13041	1.42028	0.127089	2.79803	0	0	0	1.8959	117.325	116.459	127.151	57.8066	50.3399	59.5421
ppp1r3cb	260.747	347.546	334.882	191.499	162.266	224.958	54.4485	49.7513	39.5479	42.2205	45.6017	21.6678	16.3139	15.6672	20.9306	11.5786	21.8964	10.055	18.4716	12.0219	15.0736	21.0424	10.8696	92.1583	94.3229	118.849	69.5413	66.3103	65.86
oaz1a	259.33	237.235	284.443	358.07	393.644	472.111	111.825	104.078	218.314	172.978	196.212	125.04	128.746	103.714	497.828	328.463	510.604	315.55	379.772	370.653	513.151	413.419	432.433	389.637	402.904	529.624	326.471	294.877	295.334
bnip3	259.121	228.575	220.741	445.674	632.721	854.924	71.3845	65.5287	144.697	162.478	150.349	109.017	110.731	91.3884	43.8034	32.9329	54.0083	36.4416	36.8907	33.5509	56.5439	49.8126	48.8001	292.483	271.916	395.564	251.738	244.668	246.16
mgst1.1	258.876	412.892	534.655	433.129	241.668	626.188	149.304	147.341	233.29	270.583	240.189	138.087	177.614	134.522	4.75713	2.34015	4.18897	3.60161	8.78005	4.80421	10.6679	7.71809	9.5886	509.917	517.652	684.856	712.344	724.918	691.535
selenot1a	258.286	288.952	254.054	294.664	240.841	456.766	91.2159	94.0134	149.004	137.128	147.402	87.7934	116.979	108.397	126.762	88.812	104.299	92.6467	102.229	101.599	155.766	108.427	109.258	384.562	400.958	538.282	331.493	304.34	272.314
mcl1b	258.132	215.538	208.861	876.665	960.714	1665.56	60.4833	57.8842	134.863	122.818	122.941	77.1544	85.6298	72.0316	76.1263	59.3202	91.1956	62.9895	70.8061	69.7158	102.923	73.6061	50.929	231.188	228.511	320.176	101.711	111.111	101.624
atox1	257.809	295.584	285.133	277.239	203.88	301.142	66.8089	70.8401	63.0989	99.6511	79.853	83.981	95.3076	79.8157	27.8367	24.6822	33.729	31.6084	32.6829	33.4492	34.6511	34.164	35.0149	191.706	228.841	282.82	327.186	323.644	352.123
apof	256.384	341.382	348.972	409.534	231.69	566.33	170.114	153.497	267.169	322.142	312.191	178.826	177.119	143.605	0	0.205761	0	0	7.34156	0	0	5.52126	6.73457	236.163	234.516	312.034	277.087	279.468	269.942
f7l	253.234	398.997	523.836	307.853	495.138	531.861	148.146	159.312	217.286	212.606	228.931	152.908	131.728	126.479	0	0.318516	1.03527	0	3.24137	0.520573	0.545187	3.69214	4.11499	231.305	231.219	297.335	211.434	209.444	205.912
dnajb11	252.486	141.179	201.981	716.792	782.103	658.383	15.9895	10.5815	25.5267	42.1006	52.1746	24.9578	21.1526	16.0396	5.68694	5.24226	3.81699	3.76613	4.58312	2.49869	6.06922	3.98506	3.51652	262.807	269.499	320.973	24.0939	24.4736	22.5731
ppap2d	251.04	296.425	243.501	186.887	114.1	155.714	70.4772	63.9829	120.254	130.394	176.003	57.2667	78.0667	59.6499	23.1675	15.8066	23.7535	14.1947	20.0557	16.4605	17.5719	12.8425	16.5829	112.854	112.351	135.361	30.5544	33.3268	36.3373
rps28	250.619	340.024	212.795	290.355	199.771	244.848	300.419	314	408.148	435.319	501.933	322.952	385.59	301.257	588.662	610	708.105	686.314	759.643	646.133	917.243	943.014	857.067	309.738	321.396	443.845	411.31	333.524	391.281
ATP5MC3	250.523	239.979	353.182	131.937	101.36	150.02	202.285	164.397	28.584	396.827	31.0535	163.318	216.267	177.636	414.72	300.548	488.002	299.084	466.45	351.102	484.968	425.39	374.01	274.027	291.748	411.285	557.091	531.447	521.643
rps7	250.5	0	0	0	326.227	0	123.824	156.635	0	0	0	0	0	0	0	0	0	0	0	0	0	0	0	0	0	2584.87	0	0	0
ndufb11	249.433	273.323	336.17	256.873	163.573	275.243	66.9123	82.82	106.388	136.998	105.077	89.9496	97.5588	90.7883	213.902	167.301	278.85	180.097	243.581	209.757	292.079	269.302	269.457	104.159	97.3228	143.794	130.521	139.049	125.317
mgat1b	248.903	266.469	201.37	1124.49	1885.46	2087.18	58.9153	62.6556	96.9253	139.96	136.316	57.3734	56.5118	48.3865	8.66165	9.60301	9.53685	7.50977	10.2451	5.32181	14.2115	10.8306	6.85013	247.565	247.734	307.713	62.4396	64.4381	50.8459
NDUFA5	245.912	319.109	336.654	373.773	323.757	310.609	56.872	69.404	59.2121	75.1671	92.2938	68.8377	80.9799	74.7358	122.98	97.0486	207.482	64.6114	126.124	142.788	151.175	174.107	129.571	181.488	226.2	290.677	273.06	234.748	276.991
lratd2b	244.22	411.606	378.887	286.21	143.44	396.56	38.411	46.2975	74.0848	85.5257	90.3369	50.3823	49.0669	46.681	9.26045	7.65711	6.29152	7.57587	6.27599	5.85783	15.3106	11.1087	10.4648	60.7228	69.914	98.6679	25.1075	31.1123	31.0836
rmdn1	242.188	2.66151	1.61964	0.803948	0.142884	0.656512	0.04861	0.065998	0.36859	0.166405	0.199691	0.048458	0.257496	0.049259	0	0	0	0	0	0	0	0	0	0.348775	0	0.047735	0.457488	0.130497	0.059214
id3	241.947	285.43	277.699	256.693	79.9388	317.562	52.776	47.0547	99.3529	66.1966	72.8581	41.5573	53.0938	43.0781	25.7214	21.7214	36.4141	31.7161	24.0052	30.9375	35.6823	39.25	22.3464	20.3411	20.8542	24.7435	20.6628	30.9531	26.5521
SLC16A10	241.46	176.877	172.041	138.301	100.885	111.464	55.0044	52.5399	99.623	102.612	116.116	65.3028	52.2103	50.8216	9.39899	10.3426	16.6894	8.12322	10.2991	11.5987	19.6367	10.1814	5.6711	23.06	29.9066	32.4883	31.7467	38.3967	32.8795
btg1	241.27	225.297	271.738	330.726	593.282	640.477	152.967	120.399	221.78	190.289	235.57	79.6619	85.1648	83.7524	159.039	109.944	174.571	88.5895	108.91	91.8733	127.244	146.406	95.6933	173.641	147.898	191.883	107.049	98.0267	76.5448
fbxo2	240.822	285.543	251.194	310.988	363.943	616.181	23.4161	14.8481	22.318	29.7739	51.5548	9.5106	12.9894	11.8295	106.95	71.689	120.198	89.7579	129.715	120.186	94.1519	102.211	86.1051	370.178	344.34	462.591	302.534	297.862	291.396
nat8l2	240.551	210.571	242.329	266.318	158.746	222.093	72.4211	63.118	133.082	133.394	129.58	74.428	73.1111	71.8354	2.41564	1.1989	3.29218	0.879287	2.34705	2.52812	2.476	4.21673	1.70233	70.2222	82.5844	106.704	86.0905	96.0192	91.4842
carhsp1	240.455	191.906	282.548	372.331	491.763	339.207	92.5124	58.1501	88.0627	103.939	124.95	86.219	106.222	88.8237	18.1798	18.8616	30.3877	10.6481	31.197	14.2534	16.0709	19.2266	20.1364	122.694	134.129	158.918	62.0744	60.7493	42.5214
rbx1	238.959	257.639	306.81	437.842	544.901	567.457	69.2034	81.6498	140.437	149.164	156.78	126.139	122.08	112.491	87.4419	82.0092	94.7661	84.7431	94.7034	101.095	116.419	103.693	114.502	118.735	145.83	272.498	141.465	140.821	113.297
h1-0	238.251	267.332	163.095	140.658	74.5611	66.9347	119.749	120.534	143.863	127.114	128.66	107.822	110.218	96.5209	486.106	370.781	456.171	310.243	433.506	311.682	516.501	443.492	346.591	171.089	189.66	240.228	423.801	475.821	456.693
chac1	238.19	177.765	63.7758	702.964	621.556	525.627	20.6761	15.2183	122.978	185.8	160.044	98.0916	54.0205	54.8826	178.003	258.104	287.165	125.088	83.1543	131.886	91.1813	69.8457	64.2066	212.79	211.695	330.437	25.3756	22.9225	33.0745
ndufb5	237.748	309.264	342.057	281.66	228.181	291.43	136.143	147.25	174.172	214.216	187.609	148.868	166.054	163.625	277.892	220.745	352.455	213.388	260.283	230.308	291.842	290.756	263.575	151.336	175.209	289.177	241.524	238.436	240.155
QDPR	236.919	341.993	318.958	373.269	214.169	358.277	78.1471	70.2661	116.332	145.256	144.812	107.269	103.329	73.8429	0	0	0	0	0	0	0	0	0	135.254	108.906	101.254	127.375	126.348	118.495
tbx2b	235.688	220.631	208.369	93.4596	29.4165	53.1975	69.3458	70.7233	100.469	108.425	113.019	72.7221	68.9756	67.2611	2.74988	5.08752	3.55906	2.40076	3.41272	2.32951	4.06695	4.31946	4.02965	38.0801	35.0222	39.2781	30.9993	37.9256	32.4782
SCARNA10	234.059	174.036	244.397	285.58	293.37	374.151	771.295	737.748	621.757	513.564	570.041	867.17	856.502	686.646	0.265574	0	0.616393	0.462295	0.642623	0	1.0459	0.986885	0.540984	0	0.819672	1.29508	0	0	0
rpl37	232.795	164.196	192.927	204.47	223.006	203.399	229.68	270.008	393.984	381.496	423.004	268.022	322.515	253.702	476.244	490.759	612.511	600.936	639.927	590.256	769.085	729.853	732.374	496.738	454.576	632.952	609.819	514.057	557.278
SCARNA10	231.351	208.485	334.02	302.957	367.869	311.164	857.643	989.039	774.351	826.466	974.597	964.974	1214.55	925.508	0	0.432787	0.413115	0	1.76066	0	0.465574	0	1.22951	0	0	0	0	0	0
mal2	231.277	0.85017	11.4031	168.819	131.295	20.0282	0	0	0.770131	105.932	121.953	0	0.132347	0.475649	0.053895	0	0	0.157359	0	0	0.125196	0	0	2.85327	1.1868	124.602	0.668628	1.33457	0.985274
selenok	231.154	234.227	236.873	296.581	297.108	355.028	67.6672	62.1886	141.608	169.341	172.91	82.0807	101.368	76.659	69.8641	44.9308	55.9745	61.6914	53.9539	57.659	90.2652	73.1598	73.2142	173.094	178.829	274.078	154.226	140.637	153.434
eva1ba	228.761	215.22	284.793	156.549	244.952	265.348	54.6959	56.0214	67.0891	73.8984	75.6219	49.3122	53.282	40.6716	15.0582	19.7666	28.0265	14.0029	16.0604	14.5368	10.0142	16.7452	9.18041	207.799	211.686	288.485	132.612	118.704	130.093
gpx1a	228.565	334.819	236.896	429.821	587.739	710.498	53.2474	53.8509	93.2053	82.4982	86.8351	52.6421	61.6	58.8105	29.8719	20.286	36.1596	21.4	28.9088	29.0684	53.5298	34.5123	32.2018	214.663	213.267	379.677	232.009	211.935	245.488
cox4i1	228.16	276.929	267.922	334.81	312.137	320.301	105.063	0	214.702	241.128	232.135	0	152.084	0	116.815	107.088	0	25.7983	131.342	0	0	128.883	103.272	0	0	102.287	0	0	0
cdaa	227.934	445.044	318.673	29.3502	31.653	33.0485	62.0359	59.2648	66.2036	73.6125	112.462	59.7848	38.8344	37.7321	0	0	0.862869	0	0	0	0	1.74262	0.472574	0	0	2.66878	3.14135	3.44093	2.62447
dhrs4	227.626	222.418	238.872	147.768	69.9514	149.74	67.438	70.4812	97.7546	102.264	105.456	80.3614	86.3802	80.2393	19.6198	15.5444	24.7986	13.0528	35.5605	17.4031	33.1861	23.6118	23.4158	132.275	108.445	178.713	197.977	174.911	181.002
ADM2	226.484	239.555	163.694	348.19	658.954	640.553	26.5631	28.942	55.6356	77.0952	93.0228	21.4058	30.265	20.6004	0	1.2588	1.86128	0.449275	1.42443	0	0	2.41822	1.31056	82.3292	73.7805	125.335	9.75776	15.911	11.5756
c1r	226.025	249.074	109.637	1003.62	0	1050.45	0.014924	0	26.3911	15.2654	37.517	36.692	0.019891	25.6808	0	0	0.924039	0	11.4091	0	0	3.94381	16.8808	0	0	0	0	0	131.219
cox6c	224.991	293.515	305.329	240.939	203.926	243.645	298.996	277.866	370.61	372.658	352.143	325.156	418.147	334.338	853.874	715.909	1120.84	792.387	1019.67	705.738	1125.24	1215.4	1072.39	873.29	953.281	1324.31	1326.16	1110.58	1273.54
hacd2	223.839	179.919	171.59	127.412	1.69236	115.916	0.407398	0	0	2.0885	116.529	0.33107	0	0	0	0	0.655272	0.665321	0	0	0.433579	0	0	0.321262	188.177	0.895979	0.607984	261.532	2.35746
mtpn	223.167	150.127	183.208	319.646	252.076	297.445	71.3105	63.3174	129.828	134.277	153.185	83.5203	65.1552	64.6276	30.6421	21.9722	27.0902	21.5974	27.1564	26.2682	42.1793	31.5282	22.943	97.9572	101.96	144.505	98.8285	108.035	99.9935
selenow2a	222.559	219.001	278.512	167.692	142.163	212.148	67.9894	74.6454	127.399	126.392	146.119	63.5011	57.1486	59.7686	173.142	72.2718	130.658	88.6847	117.59	104.979	160.589	114.519	123.327	99.4565	95.0106	151.517	141.282	123.43	117.325
tnip1	222.399	223.156	94.58	154.981	131.69	115.398	51.4969	35.4167	114.136	138.425	169.053	56.9815	64.4779	55.6105	11.8579	10.5232	13.4463	8.78995	12.3493	11.7672	19.0932	15.048	9.21102	192.834	190.105	240.324	66.9309	73.6548	66.3226
hnf1a	222.09	284.551	261.926	348.322	273.194	382.43	0.463886	0.547026	1.10506	0.899646	133.605	0.43592	0.711408	0	0	0	0	0	0	0	0	0	0	0.815118	0	1.3085	0.633994	0	0.66622
selenom	221.574	331.899	321.266	395.149	276.468	329.895	47.023	41.0468	80.1633	96.2772	85.8474	74.6616	65.7776	55.3172	17.7738	17.3929	18.4558	18.8903	16.5468	9.52551	21.7049	22.1888	11.96	106.358	121.457	160.999	130.957	147.568	114.952
phb	221.572	205.3	290.938	295.284	234.781	260.099	98.7451	97.8101	200.278	217.458	243.513	128.575	136.902	111.15	184.841	150.911	205.562	128.513	177.47	181.116	224.294	221.258	154.485	89.7433	105.263	150.855	167.555	179.297	163.803
cideb	221.39	123.614	263.981	145.177	270.803	149.853	35.9251	53.0745	109.418	148.573	115.274	59.4397	60.2683	50.4858	0	0	0.356777	0	2.30855	0	0	0.857459	2.35174	138.293	146.729	198.446	124.282	100.214	103.078
st3gal8	220.897	255.306	263.614	335.58	364.345	427.255	60.2607	53.7896	75.8327	72.7969	82.5056	37.3793	33.2188	33.9757	2.44016	2.49239	5.91278	2.50304	4.82353	3.89883	5.70943	6.1359	4.76471	102.632	99.4277	136.616	44.4691	49.1597	44.82
HNMT	220.697	242.325	252.201	83.0807	62.6218	126.034	60.4479	43.553	70.7808	65.5869	81.17	75.85	64.0802	58.3811	7.69914	5.3362	6.52245	6.69771	8.07068	8.54632	6.84336	9.35626	11.4183	172.17	200.261	252.68	439.38	406.409	394.401
pnrc2	220.108	181.618	292.845	207.187	156.439	315.051	89.6263	83.8556	163.524	161.333	180.174	69.2866	76.1847	61.4098	17.7707	19.0106	21.5945	12.9618	18.8641	13.4098	26.5711	18.259	13.4713	34.5775	31.5308	45.6115	31.0913	33	20.3822
rcn3	219.564	211.712	149.404	1290.18	1004.67	1188.2	282.32	0.968482	235.665	243.345	263.886	334.998	307.073	17.5214	24.9047	12.5994	12.1978	23.5049	19.5847	27.4823	27.5188	19.6925	25.5421	258.709	284.672	1158.9	42.3734	45.6322	38.7115
sdf2l	216.696	118.699	134.099	742.479	942.907	762.226	12.6192	11.0452	31.6178	38.5973	48.0562	18.5644	22.1014	20.8658	2.04247	7.53562	4.95342	5.23042	4.96986	5.04521	12.3877	6.02877	3.77534	296.162	317.521	435.205	19.037	23.1603	22.4397
mthfs	216.67	223.236	231.828	189.286	159.171	464.866	93.1436	89.6791	159.91	156.602	183.092	115.547	133.742	118.612	18.992	24.5253	20.7274	19.5004	18.422	22.0887	24.4038	16.133	23.2363	135.069	155.408	191.766	172.75	193.063	175.397
fgb	215.405	2474.65	0	1.85302	0	0	0	0	0	0	0	0	0	0	0	0	0	0	0	0	0	0	0	0	0	0	0	0	0
ppp2cb	214.718	215.653	228.101	240.916	406.159	487.957	86.5718	91.1604	141.648	166.062	160.864	90.64	100.302	88.4602	145.715	126.028	182.437	114.383	138.739	145.531	182.397	161.118	141.002	242.165	274.948	352.817	161.862	169.59	154.519
tmem50a	213.749	291.44	206.081	175.79	174.577	307.052	64.3481	64.8435	96.1531	83.6361	102.037	69.1179	75.9444	59.72	73	44.7596	67.9059	58.5782	58.2177	52.7993	68.1088	71.356	50.9059	71.2664	64.2596	81.5204	77.4467	83.3299	74.9887
eif4ebp3l	212.457	0	0	0	0	0	0	0	0	7.05806	0	0	0	0	163.171	10.1521	0	0	184.056	0	0	0	13.3279	0	0	0	0	0	0
fkbp1aa	211.347	220.304	231.546	236.289	179.512	203.164	125.609	107.011	306.979	256.755	292.006	140.612	139.378	122.976	89.9985	54.6483	77.6315	84.3823	92.7018	80.8868	155.702	84.3379	78.9128	147.612	162.636	246.781	260.017	189.42	232.876
sdf2	209.895	236.146	278.734	261.737	237.835	251.033	81.499	74.1597	98.724	118.441	124.847	102.039	86.4762	85.0408	11.4029	8.99333	13.2225	6.0985	11.4957	8.7505	13.545	13.1817	8.869	173.936	179.471	236.667	201.944	205.681	207.039
edf1	209.755	202.425	155.808	264.435	235.462	299.485	52.3669	44.9825	102.431	101.736	106.294	52.5273	65.1922	56.0431	127.473	119.261	118.489	109.534	97.9673	103	143.138	137.428	96.4792	192.995	184.931	273.66	209.182	212.266	230.542
TMEM38B	209.575	200.387	182.358	150.09	112.284	163.676	57.9776	39.373	86.4151	73.5381	73.4756	44.7439	52.9888	53.0595	18.3587	10.5183	14.8181	10.9568	14.3943	11.1819	26.7988	23.5925	13.4421	75.7825	60.874	101.21	43.4248	54.4533	48.7236
NMBR	209.531	247.842	244.076	137.229	43.5818	160.153	27.4934	28.2449	44.2431	55.3157	53.4103	43.7719	26.2582	26.8329	0	0	0.244916	0	0.338638	0	0	0.533157	0	17.7294	15.2882	20.5464	33.1954	33.2042	25.2944
reep5	209.441	195.329	223.791	106.417	85.4371	181.724	72.2032	70.7334	89.7344	109.545	114.465	107.997	76.8999	75.5337	255.383	177.141	241.284	155.794	169.938	156.735	220.39	208.375	181.594	156.687	164.163	244.64	199.792	165.829	174.912
ndufb2	208.579	219.941	261.778	179.917	181.586	248.479	89.2342	76.4871	164.844	158.305	149.908	93.3222	113.065	101.775	211.558	185.966	275.934	184.697	256.068	199.925	291.218	277.607	243.404	171.644	171.155	251.566	216.278	225.823	213.418
rpl6	207.751	1031.63	1047.29	1059.18	1346	1.37492	174.108	0.338547	1031.98	1200.29	0.761371	226.089	1030.26	0.613271	0	0	0.375814	0	0	0	0	0.212977	0.204228	0	0	0	0	0	0
erlin1	204.582	196.535	207.44	314.668	313.558	310.824	53.8001	58.0528	79.326	98.3879	86.9711	61.6785	63.3754	57.2767	40.7702	32.8111	43.3863	34.5937	32.0957	31.7378	47.5164	46.5947	35.1371	181.373	177.152	242.024	126.548	115.785	125.533
EFHD2	203.145	236.182	280.313	177.552	84.3901	164.007	75.3019	49.5511	106.171	114.811	119.169	69.0844	72.595	58.1859	14.374	14.0847	24.0076	14.245	16.9443	19.8603	33.0672	16.2328	17.7176	72.2912	81.058	97.5229	93.3668	94.5901	97.0053
tmem30c	203.063	243.715	274.537	217.61	146.014	216.489	87.5061	77.4394	125.969	117.092	132.971	99.5418	85.8662	85.992	5.12958	5.17653	6.6047	3.05728	9.59718	6.09202	9.4169	11.1624	9.73239	185.895	211.442	284.826	209.237	193.937	191.621
ndufs8a	202.54	0.297011	1.36369	0.287729	0.484885	0.570601	0	0	1.70897	0.952037	1.09184	0	0.235859	0	0	0.263398	0	0	0	0	0	0	0	0	0.355678	0	0	0	0
SPATA1	201.244	13.8837	13.218	0.443535	0.830205	0.459182	0.526908	0.60003	1.75131	1.84975	4.21485	1.4608	1.80743	1.17569	0	0	0	0	0	0	0	0	0	1.77535	1.09732	0.46624	218.249	210.947	180.991
zfp36l1b	200.265	175.563	208.474	150.077	75.4766	146.02	82.7252	93.2775	145.426	145.672	168.663	118.447	109.689	101.505	26.1351	26.5432	32.4928	20.2351	26.5225	19.6405	34.2631	26.7928	21.2802	141.083	147.381	198.3	158.004	138.057	140.685
nrn1la	199.774	289.96	545.468	229.518	118.909	319.73	67.8909	67.4365	68.5754	84.7401	68.744	41.9821	77.4048	47.3512	0	0	0.595238	0	3.27579	0	0	0.904762	0	199.056	167.565	255.55	139.687	162.696	146.869
gpx1	199.723	430.043	421.796	157.318	147.006	172.913	43.7507	86.6197	138.195	116.807	126.122	79.4687	89.5323	68.8818	75.8352	70.6564	82.7388	71.5303	89.4379	108.062	143.731	61.7289	71.9503	59.4647	71.6256	102.793	121.97	108.233	116.353
si:ch211-248a14.8	199.693	390.96	347.041	139.502	93.84	282.551	67.3067	79.3438	130.882	172.783	160.957	74.5831	66.4596	51.9715	0	0	1.23362	0	1.24122	0	0.546059	1.34093	1.58974	63.5632	58.3476	76.1529	104.361	88.0446	91.0347
SRSF7	199.589	249.954	262.356	284.629	226.491	340.715	72.478	68.2497	181.494	182.201	200.145	129.481	110.871	98.6341	15.1517	13.2315	13.6747	12.2787	22.8934	14.5729	20.8751	15.0514	19.8221	305.011	312.325	424.9	226.337	219.496	188.339
hagh	198.606	169.839	137.304	197.205	189.355	218.2	38.3	36.8634	58.0487	68.6922	71.4414	45.9029	17.4623	37.2734	12.0841	22.5349	27.1218	16.4587	24.0859	18.7143	24.2478	22.1098	6.44551	125.794	126.956	197.049	158.491	185.246	150.034
il13ra2b	198.167	269.702	222.728	136.44	92.8159	165.784	69.4222	71.2521	128.096	150.62	136.691	93.0731	115.258	87.5371	0	0	0.57448	0	4.66779	0	1.09106	1.29623	0.603148	70.0801	71.4604	121.373	123.751	120.611	115.5
fth1b	198.041	225.7	296.545	273.108	144.836	258.508	103.206	102.519	174.998	197.521	198.63	104.486	104.776	100.899	215.962	161.31	284.298	154.826	204.009	166.179	259.797	223.115	244.194	214.686	222.423	329.262	285.48	297.873	305.231
spcs3	197.855	213.875	183.339	235.133	233.507	168.564	63.6789	60.0225	87.9211	84.1616	77.5592	78.6999	73.9197	75.6675	28.9221	19.518	32.4976	20.146	31.6913	26.7131	37.174	29.5851	30.4668	85.3121	99.4377	138.849	89.3038	91.1388	82.8917
cox6c	197.697	160.565	210.9	203.965	204.065	226.147	115.087	124.823	157.632	190.671	193.368	148.342	167.238	148.688	225.766	151.794	256.82	219.66	249.855	185.554	261.489	308.493	273.141	269.24	273.331	367.606	394.329	320.095	424.593
NACC2	197.182	237.508	182.509	49.1642	29.2151	61.2425	41.0263	40.2414	78.7939	109.708	112.123	33.2235	31.1157	23.707	3.52647	4.35824	3.95018	1.101	4.4529	0.865942	2.99638	2.16938	1.90942	15.6572	13.4441	22.1465	15.7167	13.3474	12.3976
sparc	196.86	223.481	297.082	326.109	135.558	276.885	39.2846	64.4508	67.1117	74.8945	92.2483	69.2278	56.6867	52.3424	1305.67	1458.32	1828.28	1358.48	1629.02	1597.76	1614.01	1722.37	1303.14	166.125	163.078	248.966	228.681	194.562	196.746
PERP	196.66	346.848	240.854	175.306	62.2865	193.342	102.624	84.3307	171.28	181.988	182.249	129.208	143.955	117.904	94.6836	52.7367	75.1991	65.7931	73.24	67.6184	139.2	73.3728	49.0133	155.746	153.504	219.978	145.41	146.457	174.622
elovl8b	195.218	157.722	230.643	47.9356	0.009853	1.14363	0.678872	0.617126	110.376	12.6476	109.665	103.918	3.74676	11.0368	0	0	0	0	0	0	0	0	0	0.067948	0.585262	1.79337	1.35171	1.03718	283.552
HINT1	194.39	238.444	298.735	310.323	236.178	250.995	83.8842	90.0997	184.155	149.706	156.719	75.6352	113.097	89.0617	306.836	217.507	359.142	239.526	320.877	317.537	506.436	331.552	352.558	297.304	368.444	476.366	554.248	494.566	485.726
RPL24	193.394	233.161	194.93	238.96	289.761	371.257	318.649	388.756	283.842	333.065	413.964	459.116	573.6	424.057	1422.57	1283.19	1610.98	1501.73	1732.42	1511.73	1985.65	1945.05	1984.65	1717.31	1784.14	2591.1	2132.06	1826.73	2002.79
smpd1	193.213	269.644	147.795	59.785	49.5227	71.4964	14.4724	11.2297	13.7762	12.0627	16.5884	12.5229	11.8347	8.93712	8.75807	6.30632	9.57011	6.11869	8.41157	6.54001	9.00824	6.73083	9.13114	96.1098	100.207	128.499	249.652	254.43	249.427
RPL38	192.975	10.3054	258.017	0	196.972	2.28181	0	0	1.19023	432.7	0.949041	0	0	2.16154	0	0	0	0	0	0	0	0	0	0	0	13.0224	0	0	0
amdhd1	192.124	155.542	185.961	0	6.83808	121.251	11.0537	12.0127	10.8408	0	0	0	1.41505	10.2007	0	0	0	0	0	0	0	0	0	128.548	0	14.227	63.9414	71.8144	142.203
gm2a	191.365	312.546	296.787	285.186	175.591	286.346	166.613	154.135	273.399	250.663	279.122	117.273	153.405	148.154	52.67	35.459	53.4824	42.4188	47.1893	48.6214	96.2596	56.8727	41.7387	186.218	173.401	222.236	92.3702	92.3886	83.1664
bc10	190.932	156.34	184.708	339.711	337.875	505.406	141.307	145.345	202.632	200.219	199.006	122.332	158.856	136.442	157.872	78.3773	146.967	112.575	112.638	98.2541	110.88	127.994	136.384	193.843	155.754	218.559	141.738	109.382	111.153
gpc4	190.712	1.24197	0.752167	121.524	0.262678	0.67484	0.531989	0	1.4097	103.587	1.09778	0.55294	0	0.116758	0	0	0	0	0	0	0.236556	0	0	0	0	0	0	0	0
hpgd	189.795	140.592	200.791	200.385	213.169	257.676	61.9869	67.6507	88.2397	108.49	104.824	45.7874	38.9097	43.4032	4.00498	0.489415	1.5853	3.59651	3.29079	1.34309	9.8076	3.81631	3.32939	154.776	142.625	237.442	201.309	188.268	208.504
nduad	189.762	239.841	241.922	203.766	121.372	195.107	111.67	116.075	175.54	224.807	216.87	111.465	156.197	149.651	541.672	276.542	505.185	292.622	313.826	314.436	371.417	617.699	440.276	177.708	162.743	271.374	243.579	238.266	236.221
lpcat4	189.696	216.067	217.314	209.342	171.329	210.589	49.029	39.8419	121.784	106.175	134.005	41.1053	38.0442	30.5259	7.02131	4.94904	9.69549	5.89963	11.6167	5.64114	11.9864	7.853	6.00216	142.506	139.147	187.671	90.2962	78.5025	81
oaz2a	188.686	253.734	229.248	151.056	74.1752	166.643	47.5124	61.3562	104.393	77.6362	90.5229	41.9371	44.9543	34.9552	458.23	446.007	523.431	375.366	414.515	421.717	472.442	402.57	322.705	39.5486	37.661	52.8648	45.3638	64.2971	53.4914
ogfod3	188.391	155.831	180.664	356.76	268.834	293.149	24.6516	25.6156	39.7953	49.4784	49.4302	33.3854	26.5714	30.6396	9.42708	7.87396	12.4526	9.84375	10.5813	8.0599	15.1797	10.3318	7.22813	91.1656	106.752	133.343	42.9896	50.5281	44.8036
AMD1	187.894	218.399	175.479	10.2462	25.4053	23.4916	20.8915	23.0776	35.1914	42.8626	45.7992	10.6133	26.2491	22.5722	44.4815	37.5777	12.0904	42.1198	35.8573	40.6566	42.422	12.2661	36.5309	28.047	32.4478	41.3809	54.4675	5.01452	53.1793
st3gal4	187.572	207.209	19.0589	15.5423	165.65	11.5244	1.56082	2.79557	10.8261	12.5237	16.5527	2.83705	0.968809	1.7797	1.29815	10.9579	0	11.6041	0.604439	0.560987	1.08469	0.746215	0.574483	1.03225	124.637	176.924	2.58259	1.88789	4.46612
ptges3b	187.431	276.076	281.776	1138.68	2170.86	2866.2	39.6744	53.6149	75.8479	79.0233	91.5799	58.7439	67.4903	46.3027	38.0374	35.8139	45.621	31.1074	28.3265	36.5656	37.8129	42.0151	26.3212	351.88	406.859	525.302	77.76	83.6706	86.293
dpys	187.235	260.718	282.059	110.553	106.725	171.654	34.3554	29.8006	62.5081	67.9856	61.6457	29.5783	26.4018	27.38	5.6648	4.73093	5.00237	3.84791	6.63886	4.87487	6.29527	7.88962	4.67955	73.1577	73.3957	102.594	131.65	145.961	138.103
slc29a1b	187.06	135.838	167.79	186.973	46.2636	172.359	89.3857	61.8828	135.815	100.779	114.158	86.3424	109.693	71.0339	0	0	0.764105	0.128536	0.834911	0	0.985058	2.11089	0.890131	76.2693	110.772	151.724	175.464	91.875	111.899
f7i	186.864	1031.45	134.605	519.72	1185.31	368.024	212.782	208.766	320.222	471.461	318.021	282.12	235.091	211.12	0	0	0	0	2.8111	0	0	3.91164	0.505866	62.087	112.656	156.084	60.6375	51.4818	52.3022
VAMP3	186.849	208.553	217.924	201.947	185.432	12.7101	0.256081	1.10065	0	0.260665	108.713	0.473059	0.518271	0.767495	0.769305	0	0.675465	0.493345	0.022496	0.579475	0.480446	0.424046	0	0	0.262877	0	0	0	0.757341
ddah1	186.024	142.765	179.835	220.896	146.257	138.704	44.2903	37.8009	72.1673	94.6008	71.0147	47.6608	44.9117	42.6048	31.179	18.5883	33.3548	27.381	22.6979	16.4264	22.1384	22.9647	19.3245	85.8475	92.332	103.692	95.6702	83.0294	104.175
rpl9	185.98	196.815	158.77	145.145	1118.48	1033.41	680.012	725.71	1045.47	1148.04	1306.85	704.702	1012.54	785.598	1463.4	1165.62	1729.56	1423.52	1682.69	1448.92	1720.75	2100.89	1474.59	1037.07	1072.36	1613.31	1331.92	1148.96	1139.78
si:ch73-206d17.1	185.855	190.057	249.842	137.356	179.492	180.589	70.1915	71.2373	93.4806	92.1883	110.763	50.7777	57.0715	45.7959	0	0.219146	0	0	1.82674	0	0	0.920095	1.1432	50.1907	56.0862	74.3964	56.9007	64.7959	65.449
cldn15lb	185.812	231.307	253.938	136.045	112.035	12.4421	127.219	0	16.3359	23.5368	19.7544	0.358122	0.311908	0.156572	0	0	0	0	0	0	0	0	0	0	254.153	0.381321	0	0.891906	243.8
ndufa3	185.631	252.425	219.531	186.887	160.984	241.137	67.256	71.4286	90.6825	100.944	137.279	84.5893	97.9663	99.8095	115.721	94.8908	171.579	121.269	152.778	116.981	158.358	145.224	156.721	111.959	142.137	224.681	257.349	252.343	177.953
litaf	183.664	169.388	138.46	130.311	92.6026	172.956	53.2789	48.1761	75.8581	92.0609	73.4407	52.7324	68.4975	50.6365	17.0521	16.9624	24.9195	19.3092	22.3965	17.4261	24.7949	21.4203	17.1675	133.771	135.208	206.417	126.086	129.76	128.076
dad1	183.395	150.58	197.755	376.582	426.715	320.015	56.0195	59.5955	97.477	166.421	144.87	118.893	134.462	122.47	30.2636	28.7699	34.5397	31.8689	23.9944	35.8717	53.4045	30.1464	29.7294	302.859	281.407	430.123	233.973	242.519	255.251
NDUFA13	182.982	288.394	268.361	184.631	167.224	181.249	52.7966	62.6494	119.309	103.006	121.434	95.292	93.7805	87.2609	280.099	200.661	300.337	193.587	308.62	232.027	314.571	341.392	292.984	93.7839	101.536	143.313	130.308	119.732	138.894
eif4ebp3l	182.557	117.081	183.467	110.023	150.371	269.241	58.4522	48.9101	34.0377	35.2609	35.9826	11.0058	21.6725	12.7362	464.296	554.933	640.568	368.539	428.075	431.159	526.409	520.536	587.557	205.565	227.226	324.116	225.997	220.878	228.649
cd302	181.554	201.62	167.797	187.011	0.257268	223.537	0	0.666119	2.40969	126.378	1.09497	0.072832	1.06911	0.028052	0	0.958479	1.41485	0.20746	0.013647	0.4765	1.44842	0.402448	0.363477	0	127.59	0.960571	0.169944	0.085811	122.26
cnpy1	180.818	217.516	194.178	634.767	568.895	586.392	112.396	129.889	152.205	199.078	212.615	177.329	198.489	179.244	1.16667	0	0.753521	0.795775	4.52289	0.504695	1.00235	3.10739	2.7054	180.792	191.656	263.318	176.853	180.596	155.796
tmco1	180.443	171.052	162.325	318.864	384.507	236.302	33.5877	37.3688	94.4212	96.8791	113.28	52.3302	49.3252	45.0692	58.755	29.8795	57.5168	43.0282	41.49	43.2475	49.2932	72.9754	38.8638	233.535	259.525	329.965	141.397	152.708	148.384
IGFBP1	179.981	92.5188	205.29	782.324	888.761	861.024	336.009	159.217	399.03	342.194	344.505	164.205	188.758	176.662	0	0	0.806452	0	2.51882	0	0	3.5793	1.47581	63.6022	71.9355	86.8508	52.6613	56.6223	49.6297
TMEM14A	179.34	216.475	179.886	158.376	162.844	255	65.7302	42.4476	67.0254	71.4857	90.6063	65.0889	59.1857	55.127	14.5254	12.3302	11.6032	8.4254	9.6	4.50159	17.0064	12.127	11.546	202.127	223.375	266.814	244.986	240.471	262.074
ndufa3	177.81	217.378	12.6633	11.2977	137.236	136.624	4.1961	1.23728	1.93512	1.80604	122.557	3.55458	4.66206	30.376	1.95365	0	53.0821	15.1642	53.4312	28.5094	62.2713	2.03031	2.95292	160.583	174.187	267.392	219.1	239.742	248.893
ecm1b	177.465	236.064	247.942	277.927	189.073	391.616	61.7212	69.7069	85.8575	101.634	112.702	71.4464	58.5282	57.3618	59.5249	48.6904	93.4001	55.4596	74.7652	71.1646	73.1361	100.896	64.2057	143.535	141.65	165.415	165.119	150.412	144.238
lrrc58a	177.139	245.717	271.843	208.8	105.132	204.418	29.869	29.8295	25.0578	34.4261	35.3665	37.0909	29.4646	29.2983	0.276515	0	0	0	0.732955	0	0.809659	0.854167	0.685606	36.7787	44.7666	62.8665	95.4489	81.2718	86.201
manea	176.251	158.723	218.744	119.889	103.719	114.898	50.1931	51.361	67.2131	65.1105	70.2043	47.743	46.4276	40.8838	3.34602	2.20156	2.55404	1.85588	1.64786	1.6329	4.73623	3.41468	2.4242	93.1462	92.2872	115.402	97.2172	106.386	97.7828
mylk5	175.862	213.139	226.89	158.684	83.5511	160.737	60.5097	60.4175	131.011	116.817	133.998	69.6251	91.911	79.9188	10.4145	0.985992	4.50525	6.24101	5.4774	3.2028	14.2748	5.90497	4.28749	121.327	118.78	141.179	137.294	134.512	138.361
ccni	175.49	247.711	202.93	269.641	189.362	282.275	84.5904	81.4461	139.117	172.084	163.757	80.5597	82.8752	65.2185	192.728	112.866	142	109.296	170.75	123.562	194.137	156.184	135.893	92.5999	91.0195	109.379	77.5	75.2566	68.1497
msrb2	174.742	142.077	175.657	106.467	89.3515	106.648	77.0422	69.3605	90.4949	103.667	94.5897	73.1471	86.6931	81.417	1.10057	2.41651	5.59867	1.9981	5.0351	1.41176	3.14326	5.18027	5.10152	199.344	224.921	313.332	266.618	237.975	227.236
spcs1	174.593	175.227	168.481	216.095	221.936	223.947	98.2601	104.981	77.5037	97.1834	96.2271	114.39	145.582	126.421	45.742	35.0448	57.4136	24.113	56.8401	39.3806	62.0245	66.7122	41.4446	276.141	276.085	388.904	335.242	279.335	303.432
sstr2a	173.844	170.19	154.374	106.229	70.6927	130.44	58.8682	57.7694	126.549	103.819	109.76	58.1442	36	34.8418	0	0	0.247117	0	0.1771	0	0	0.199341	0.371499	46.4357	36.7393	49.0198	17.7059	24.4835	19.0297
SMIM7	173.373	273.757	226.829	263.649	260.706	254.919	51.614	44.6754	62.0417	68.8838	84.3662	61.8947	64.9342	50.7851	42.3114	21.2588	35.8224	33.4605	23.364	23.2675	40.4342	36.4518	32.3465	112.241	152.456	179.36	168.09	154.515	140.493
foxa3	173.368	200.04	199.489	124.149	50.3636	131.955	38.7576	47.8311	86.433	87.0848	114.797	52.4955	56.8561	51.9333	0.927273	0.227273	0.475758	1.36364	2.58561	1.13864	2.19242	2.11364	0.956061	85.0045	79.8076	105.621	84.0212	79.039	73.8061
agpat3	173.293	143.202	170.849	313.854	325.043	461.737	110.1	91.2402	145.1	163.437	148.67	122.38	111.256	99.2492	33.7605	21.0749	33.0446	25.8462	42.514	29.5386	35.6529	42.9818	36.3287	82.4446	82.0191	108.877	144.711	148.05	134.046
COX7A2L	173.248	296.396	223.43	155.516	99.8595	146.074	75.9048	66.765	106.852	117.848	120.642	76.7909	94.3323	88.6708	223.305	135.747	243.558	157.423	165.734	159.911	219.311	208.678	187.08	156.892	156.633	240.645	274.586	266.074	261.704
ino80c	171.964	176.344	140.001	137.999	40.3029	113.876	50.3165	46.199	38.5815	30.4507	30.2456	38.2716	33.3601	35.3872	5.3025	5.05838	6.04663	5.30591	3.42722	7.35974	13.0154	8.69409	6.76384	44.4816	63.4212	76.0542	119.713	109.753	118.737
JUNB	170.608	86.4305	105.281	630.977	718.271	1086.87	35.0484	18.2953	63.5131	56.4521	50.2892	18.4385	31.4465	26.8958	24.2512	9.35587	15.3333	7.43662	12.9502	12.4718	26.115	11.4545	3.54272	91.4178	65.6399	103.338	7.40845	8.84413	7.60517
serbp1a	170.464	173.187	221.611	166.186	148.434	259.356	170.625	13.2324	238.881	266.884	280.525	153.023	156.767	151.614	142.6	142.6	145.304	151.52	133.411	137.732	169.844	211.488	143.127	185.582	187.007	276.735	234.01	193.896	207.954
SNORA73	169.627	145.494	306.876	211.373	736.089	648.636	1214.76	1965.78	771.729	702.377	949.039	1824.78	1964.17	1711.1	0	0	0	0	0	0	0	0	0	0	0	0	0	0	0
cited2	169.528	186.904	192.152	145.995	132.583	131.569	65.0096	70.3018	87.7421	82.7887	98.2455	71.284	83.6763	73.7874	135.115	164.937	185.977	55.9081	77.6996	54.9781	41.2702	48.9562	39.893	106.472	109.647	144.435	99.9259	101.226	107.807
cldn2	168.908	168.475	190.234	155.933	80.2786	84.3487	69.1863	54.7727	139.335	140.296	145.894	86.8137	64.2769	69.3299	0	0	0.512821	0	3.30256	0	0	1.07692	1.57265	112.009	108.376	134.116	75.2752	66.6923	60.7128
rbx1	168.815	217.899	256.114	289.354	373.527	443.661	47.7109	48.3081	103.746	99.458	106.159	69.944	68.9275	56.0338	76.5544	65.9975	90.0082	71.0354	86.9316	75.1812	88.1343	85.8089	87.7512	108.764	106.674	164.092	99.0156	93.673	83.2875
pla1a	168.625	148.367	229.836	120.873	61.1035	118.922	100.837	90.246	150.842	153.451	156.248	106.697	102.706	89.8416	0.520878	0.24365	0.62204	0.195006	2.03013	0.257856	0.079208	3.76496	2.44813	137.313	139.697	179.677	115.566	118.791	95.3347
elob	168.281	74.1768	98.7014	62.0551	69.2725	67.1667	21.042	30.2652	34.8435	29.7913	46.0971	28.8942	24.658	17.7507	84.7565	58.7203	98.642	70.7971	78.5839	70.1406	107.459	104.152	76.1609	63.0101	63.5536	91.4116	83.8884	86.7942	102.303
sec62	167.851	161.259	112.145	185.671	192.559	175.049	44.3363	51.1057	68.3836	84.1057	86.9898	58.3201	49.5256	40.7732	5.08951	6.67903	10.1611	7.37383	7.45695	4.61722	8.66922	11.1275	5.26002	122.789	124.513	153.877	46.6778	57.636	52.272
cyb5r2	167.202	176.595	12.196	13.8977	122.824	157.566	11.5268	1.22551	113.093	35.6287	114.184	121.508	108.862	12.668	0	0	0	0	0.661076	0	0	0	0	192.438	175.976	23.0736	31.5142	17.9069	16.8155
jagn1b	167.146	152.647	116.432	459.184	443.557	396.922	24.7183	27.0348	50.1704	56.4191	56.5783	26.7983	39.3339	23.9948	24.2678	23.7104	18.0174	24.0157	21.9191	15.7487	41.673	20.453	26.3096	144.09	163.586	237.56	55.4696	53.7652	69.527
sec22bb	166.939	137.601	151.113	271.952	265.869	278.114	27.0782	23.4137	62.5257	67.8863	77.5293	40.7984	40.6228	39.4801	23.9674	24.8091	31.3502	20.2792	30.0694	23.7127	34.4489	24.0941	25.7137	214.012	236.702	283.243	142.571	132.905	130.912
wbp2nl	165.926	200.367	153.592	216.224	173.178	2.13719	2.16599	2.64846	1.55314	0.964346	1.67998	3.47514	1.40173	1.62533	1.5436	1.09762	109.212	0.627391	1.09256	1.16273	0.726782	110.399	0.78204	1.00466	1.32387	1.73535	0.36231	1.33377	1.28351
tmem9b	165.711	176.586	137.471	200.205	140.847	227.558	59.2917	62.4583	92.9279	118.418	104.109	71.7804	63.7092	63.6111	52.3785	44.6102	57.4201	36.5503	40.3672	35.3507	59.4575	45.645	45.0304	90.217	83.2543	101.629	85.3194	90.7049	90.9158
ssr3	164.112	118.591	135.482	214.684	177.546	192.934	29.9824	35.6342	56.2265	62.583	70.9616	52.0524	53.8101	43.1397	9.28972	8.55722	10.0934	7.37276	8.63392	7.89584	11.0026	8.84672	8.13589	69.9962	76.7909	89.0926	42.6432	42.8561	42.2937
SNORA73	163.827	223.64	206.611	313.196	287.229	303.222	1045.48	1282.69	1145.26	952.976	1236.31	1347.31	1449.99	1176.36	0	0	1.32444	0.991111	0	0	0.666667	0	0	0	0	1.55111	0	0	0
zgc:113425	162.764	169.895	150.923	150.652	98.9531	95.035	26.8638	15.8177	65.7934	60.449	61.3854	39.8557	33.5312	29.7887	1.30655	0	0	0.272321	3.43601	0	4.12798	1.83482	1.16071	47.0521	45.7729	68.687	57.8438	58.9688	62.1689
bloc1s1	162.287	145.148	108.467	180.428	159.14	304.214	68.1221	67.0987	155.058	149.753	134.636	52.0924	72.8779	70.9204	53.0165	47.8832	63.3928	39.1343	33.3355	43.6911	53.6003	54.2988	52.9533	72.7824	73.7017	99.4756	58.6014	77.8206	65.1852
tspan6	162.259	189.145	166.176	179.362	173.178	215.605	61.7813	57.645	113.074	138.62	130.931	60.0958	77.2097	66.6872	38.396	29.1855	45.8624	29.7852	42.4482	29.8706	38.2261	44.416	35.3141	101.326	100.085	151.116	99.8408	111.252	111.747
bckdha	161.929	1.33229	161.431	0.564211	2.07418	126.343	0.899121	0.718441	1.02004	1.04857	1.18447	0.945874	0.731858	0.49629	0.685418	0.526866	0.407017	0.482252	0.200517	0.599073	0.315986	1.76801	0.440789	0.370537	0.396603	0.538834	0.338572	0.839424	0.477915
ppat	161.88	131.162	124.704	106.284	45.0303	119.513	22.9308	19.8919	54.2726	68.5179	69.3656	39.5793	38.2214	35.4624	2.50126	3.61041	2.86913	2.2193	2.80192	2.61243	6.72612	3.97676	3.36129	25.7979	25.6744	33.1981	80.5483	79.4805	80.0319
selenot1a	161.32	181.499	224.261	216.312	190.098	238.238	56.6607	61.8184	77.7628	80.2593	86.0302	73.9258	61.0644	61.924	49.29	35.4942	46.7123	30.7987	35.7784	43.5452	51.105	49.5365	40.2575	124.163	116.394	153.718	161.267	135.81	121.128
vegfab	159.864	174.949	162.829	185.088	376.747	527.378	19.0208	24.8902	22.7957	27.3189	25.4407	13.375	11.7604	7.66346	36.7652	24.7388	33.7612	10.5513	13.7885	12.7692	11.8934	15.2123	13.5905	52.5817	67.0745	79.25	15.4087	22.258	14.8622
ppp1r3ca	159.562	216.141	154.323	86.8795	38.4816	55.2613	52.0181	34.5691	88.1976	79.9224	90.4997	51.4666	62.419	69.1159	0.349715	0.747543	2.32023	0.461459	2.90119	0.055354	0.488877	2.29074	1.582	99.0202	101.294	138.473	79.8712	73.2757	65.6022
TLR5	158.934	153.76	95.8862	92.8908	115.355	114.663	20.9757	19.781	37.5367	34.9186	37.783	29.7921	22.695	19.7537	0.250885	0.428933	0.595347	0.42084	1.11431	0.496712	1.02782	1.84927	0.707638	41.6394	34.4471	52.7461	35.8533	43.2802	44.2903
sat1a.2	158.665	150.997	180.502	141.591	143.002	159.097	71.1129	67.83	85.2906	86.8251	84.9762	47.9787	64.5033	56.1043	20.4097	8.22332	17.8695	19.6232	11.1346	15.6544	25.9606	16.5238	18.0156	160.661	134.169	223.806	203.123	200.147	179.695
aqp9b	158.253	133.847	142.162	0	0	0	0	0	1.39623	1.37664	0.972487	0.65292	0.131496	0.086654	0	0	0	0	0	0	0.171865	0	0.154146	0	0	0.372823	0.368435	0	0.24221
msmo1	157.927	166.221	215.213	105.92	91.7777	100.469	56.7797	107.03	175.191	214.558	206.918	192.968	137.563	135.653	1.9001	1.29688	1.2882	0.977517	5.16794	1.37353	4.02964	3.5465	4.33378	93.7603	91.7174	113.139	59.3003	66.24	62.3759
UPP2	156.096	114.602	294.547	1172.99	3949.26	2568.92	530.584	451.961	743.249	810.806	686.489	315.513	288.564	268.761	4.72386	7.59672	9.68558	4.83254	34.6145	2.71634	8.15448	21.6733	21.2686	1565.93	1615.67	2082.57	1061.12	979.538	947.069
ATP6V0E1	155.41	156.811	123.283	136.901	91.5691	128.694	38.3505	28.6031	67.001	56.3273	60.367	34.3062	41.8247	30.6309	44.3129	43.5082	54.2278	41.6206	43.7495	52.8144	50.199	58.1426	49.9727	45.3351	45.6	65.7309	60.9454	63.4948	55.6402
ndufa11	155.394	224.835	209.799	176.368	152.256	189.212	67.6434	69.3836	86.3505	80.0625	87.2136	86.4918	83.5466	65.0882	96.9155	67.102	106.713	77.712	109.211	90.9449	126.3	105.567	97.2574	103.92	112.028	165.635	148.417	123.939	135.074
btg1	155.09	123.681	171.66	201.813	311.075	473.76	111.342	82.4448	151.79	152.74	176.293	61.46	63.5171	61.8152	133.85	104.826	160.753	99.1197	101.008	88.5219	121.456	143.108	90.8257	155.786	153.977	173.045	81.1448	79.3457	79.4638
ppiab	155.054	0.325484	1.12652	0	0.114285	1.18875	0	0	0.144857	0	0	1.10139	0.113792	0	0	0.111177	0	0.183851	0.35388	0	0.243182	0.109581	0	0	0	0	0	0	0
selenow2a	154.386	181.889	173.676	164.763	140.731	180.37	65.5945	51.0955	102.576	123.5	125.926	65.4766	79.6413	67.7602	150.255	70.9368	119.515	90.1164	78.7333	90.7159	138.731	110.298	97.1841	96.3662	94.8373	129.024	104.638	111.313	117.524
pold4	154.383	179.861	252.772	195.466	160.231	446.636	76.43	73.0311	113.089	93.1751	111.553	63.8852	86.5749	75.8998	109.865	67.4708	111.804	65.499	107.204	89.106	119.238	101.704	95.0525	181.121	186.176	241.544	182.768	154.716	176.661
cd81a	152.217	146.154	193.299	97.6479	62.0913	121.598	32.1895	32.8637	56.2197	56.0855	60.3197	37.1788	38.9927	32.3075	118.535	118.019	153.319	99.8236	111.53	120.164	108.723	145.478	105.199	108.282	102.938	136.499	107.502	105.5	108.224
rsu1	151.941	120.428	138.018	122.026	119.942	145.403	16.3166	16.1665	43.4303	50.2785	10.6499	11.3098	37.4675	28.5095	0	0	0	0	0	0	0	13.2344	0	41.6384	41.9822	55.2913	28.5543	27.338	23.3265
aprt	151.568	218.501	155.626	156.897	167	145.689	28.2277	42.6111	86.4854	96.7687	116.179	65.2769	52.7732	55.0018	21.9954	23.9627	33.5628	21.0018	26.5902	27.5191	31.6202	31.2195	29.1503	57.7341	45.7696	91.1494	85.7086	94.2149	66.6931
rs13	151.087	200.214	176.342	254.198	233.372	230.867	81.7381	74.0444	158.911	151.174	154.137	106.911	120.238	92.9319	83.2668	27.6919	52.7583	58.5008	83.757	51.2113	90.6343	99.4827	102.801	217.549	212.704	272.118	223.097	171.803	198.7
hyi	149.944	184.657	174.57	160.414	144.941	288.238	55.7744	53.5387	72.6286	72.8849	70.096	70.7508	69.0312	56.1116	36.3628	24.1824	36.3874	34.3085	33.6487	36.6291	38.3256	48.1915	32.7256	161.743	170.476	236.484	212.52	220.056	209.093
lep	149.544	55.5902	11.3465	280.457	595.767	762.644	12.2873	6.71577	59.4772	39.7718	49.0207	11.5529	27.1172	14.3485	0	0	0	0	0.257261	0	0	0	0	320.479	343.568	487.262	22.7873	20.555	16.9689
arf1	149.497	116.259	170.401	277.034	358.035	284.952	53.3142	46.3018	101.024	92.9447	93.131	47.7615	39.753	40.0365	49.9023	48.1214	65.4151	44.4076	49.9957	44.7476	73.674	50.3759	43.1724	156.839	156.665	227.55	84.0086	69.6063	76.9522
nr1h5	149.43	183.879	172.504	76.6588	16.7497	55.1552	31.066	34.3812	67.2587	67.3174	79.0271	36.854	44.6614	35.6952	0	0.318233	0.139262	0	4.5948	0.298658	0.33557	1.04978	1.43177	46.061	42.6693	68.5232	88.4729	96.1991	88.6361
psmd8	149.166	128.301	164.083	166.137	204.572	165.241	39.1705	53.7648	71.3722	84.6916	82.7077	69.0284	63.7295	59.2828	175.624	119.062	185.497	127.41	121.706	124.187	139.01	170.742	140.606	124.549	119.932	194.665	150.667	141.026	148.967
selu	149.059	250.495	212.781	143.026	91.7797	134.155	76.4631	67.2428	75.5179	68.5304	62.9248	60.1755	77.6795	67.5211	39.1662	26.5976	36.8054	29.934	34.2065	35.9301	38.6102	50.3793	37.6042	128.227	155.396	200.767	278.253	298.279	262.446
zn706	148.817	1.38317	148.595	130.713	1.54891	0.530936	3.1926	3.9213	4.35285	5.58247	103.28	3.05921	74.5299	71.9833	0.9678	4.05553	0.945479	3.76005	2.40182	0.935104	108.948	78.9737	6.69529	253.957	23.0377	24.652	13.3101	16.5522	264.672
snrpb	147.849	134.176	203.846	227.61	265.51	189.476	82.2831	91.4406	174.526	200.583	219.336	111.951	107.94	101.285	111.399	102.688	106.548	96.8493	93.6449	96.3073	162.584	129.827	112.761	134.916	136.325	168.793	180.022	178.426	152.873
mpst	147.79	189.724	207.207	148.094	98.5749	125.521	44.4674	52.77	59.5536	67.6228	68.6764	67.873	68.8314	54.9194	26.5568	17.7445	30.5745	15.7136	27.2158	18.6139	24.4414	23.2757	32.8982	111.594	117.623	146.416	219.877	213.33	189.212
prelid1a	147.153	148.244	140.943	179.889	145.254	153.478	30.8311	35.7767	49.9571	57.5655	50.7998	39.3867	45.8608	33.714	6.76128	9.13806	11.2156	7.85589	5.87569	8.53795	12.7233	12.2981	8.28658	94.1397	91.5077	122.772	43.2657	49.2155	48.9819
arpc3	147.012	190.854	185.644	137.319	106.976	188.709	42.9888	48.1155	67.9732	80.5986	71.01	58.9126	80.6417	62.8895	70.1885	37.3152	68.3564	75.304	57.9413	47.5019	149.856	62.1816	72.774	115.856	114.162	179.142	190.979	139.046	147.984
serpinf2a	146.976	211.633	187.943	200	0.674691	0.154016	0	0	131.261	64.9493	142.25	2.89976	0	1.78041	0	0	0	0	0	0	0	0	0	0	0	0	0	0.527891	0
rab5if	146.931	132.165	0.776558	1.95215	2.17943	299.583	1.64687	2.00757	5.78398	1.8402	1.56217	1.76334	0.98964	1.62762	1.45871	1.7672	1.56351	2.0301	1.42658	1.87754	1.45797	1.31843	1.44991	1.32358	170.389	1.44175	0.907647	0.91463	1.17626
tmem106ba	146.167	160.149	116.268	218.303	235.54	223.076	47.8927	48.9084	75.8436	62.9067	67.1531	36.714	47.676	36.8525	59.4469	41.8112	60.3397	30.8961	33.0983	36.8497	44.5883	42.3084	36.9721	257.525	240.792	376.776	124.251	117.025	147.885
CCNI	145.949	181.407	106.433	132.813	107.629	148.721	34.359	56.002	93.7661	150.822	182.891	111.767	45.774	49.9211	323.997	200.32	256.849	195.594	245.643	259.53	348.155	345.154	108.764	165.627	168.503	215.341	171.09	132.396	146.698
ino80c	145.865	68.6848	123.799	82.2106	48.4142	96.6582	15.0787	12.9369	10.9667	10.433	13.3294	11.8874	11.4216	9.94769	4.18298	4.13404	3.93475	2.87021	4.28546	4.05426	7.62996	6.18298	6.10319	47.8665	48.3301	64.3894	136.193	131.927	133.971
isoc2	145.481	172.506	163.199	216.525	271.671	280.549	37.4251	43.2322	87.3255	122.668	114.27	60.1992	61.941	67.2563	77.8426	69.6187	77.4892	63.4549	90.0209	81.0799	111.612	69.7741	85.2646	183.204	207.233	285.864	108.784	107.76	115.899
RFK	144.389	161.17	116.039	284.273	258.759	258.051	18.2097	24.249	28.5393	35.9157	26.0867	19.1623	20.7026	16.0202	0	0	0	0	0.331653	0.418347	0.371976	0.252016	0	33.2339	35.0034	48.8921	25.7752	25.3972	32.0948
COX7C	144.139	160.679	150.411	105.152	96.5931	129.316	71.5873	81.7239	87.3912	90.3509	81.0328	75.2006	82.9837	66.5969	236.327	182.342	279.986	190.04	264.705	202.161	252.804	292.613	249.324	127.418	160.397	213.932	272.535	252.837	255.184
G6PC1	143.958	98.5242	224.285	1236.89	2573.65	4390.51	111.341	72.0782	231.796	210.769	225.115	169.242	134.833	133.797	0	0	0	0	3.92412	0	0	6.27654	4.76909	394.847	393.556	511.358	397.25	400.091	380.275
wbp2nl	143.554	173.631	146.499	205.279	148.398	198.305	41.7382	40.3955	54.4226	57.4455	60.6826	45.0771	60.5132	44.6556	57.4042	44.4632	69.7083	38.4938	46.4632	56.1542	68.9681	59.6951	43.3694	93.4986	77.9281	123.974	92.9194	92.5236	86.3817
pla1a	143.417	187.098	233.033	74.1868	75.3239	153.124	78.1443	78.579	104.129	109.802	112.899	63.9164	66.2773	56.5124	1.73928	1.03891	1.68549	1.63251	2.44455	0.786746	1.1912	3.94249	2.32707	65.6739	62.8896	96.5517	93.4918	96.934	96.7162
fuca2	143.236	202.968	167.209	162.095	100.968	149.386	59.1248	49.6322	71.0832	81.5875	77.2286	64.5724	60.6423	45.7134	10.4994	7.36498	8.56018	9.48959	10.1688	9.64909	28.9898	11.7985	10.8432	122.814	128.79	169.379	138.324	157.638	156.044
f7i	142.393	206.129	292.54	222.66	432.932	557.24	307.94	201.133	72.4833	882.468	83.2183	207.084	234.174	250.902	0	0	0	0	14.233	0	0.226814	16.9251	0.572659	27.2774	28.4593	38.9265	27.7815	33.0568	32.6022
SNORA73	142.366	194.663	194.916	327.945	272.898	313.995	825.569	1017.28	799.207	586.528	840.77	1066.36	1274.67	991.904	0.293333	0	0	0	0	0	0.902222	0.053333	0.326667	0.275556	0	1.33333	0	0	0
SGK2	141.926	10.5917	210.623	2.21417	0	0	0.929108	0.237641	1.60946	0.467768	0.396788	0	0.656368	0	0	0	0	0.204551	0.263373	0	0	0	0.540677	0	0	0	1.68775	0	0
sult2st1	141.651	60.3765	123.042	162.659	218.902	336.591	40.108	34.3128	25.0659	24.9126	28.034	13.76	22.3521	21.4881	0.234272	0.276102	0.765741	0.001819	0.658861	0.214313	0.261495	1.34333	0.461431	89.7918	101.04	137.685	121.091	122.016	124.216
cnbpa	141.16	122.572	195.693	230.23	159.424	151.002	94.5261	107.124	168.281	202.35	196.738	124.475	118.995	94.6064	360.588	303.065	380.907	329.777	329.808	320.046	513.169	437.124	356.743	224.931	234.747	273.869	296.405	301.234	274.895
ATP5MC3	141.058	227.001	175.624	0.434689	1.06012	0	201.838	1.05336	2.98573	3.16091	323.347	0.753044	0.731979	199.301	0	0.218129	1324.98	0.633911	0.978005	0	0	0	2.68028	0	0	0.510901	0	0	0
st3gal4	140.914	161.243	184.397	36.433	24.1748	2.15622	17.8394	10.2311	35.431	25.4751	0.805068	11.2557	1.61156	17.5448	0.392354	0.647135	1.41779	0	1.12777	0.240863	0	0.648936	0	1.7293	20.3144	24.4737	4.6872	3.72208	4.5948
SRSF6	140.182	146.475	167.248	225.087	206.276	298.08	20.9695	18.6514	46.9714	52.5961	78.2907	21.6272	13.0649	16.2589	81.0706	70.4752	86.8276	61.1425	66.7767	62.8817	94.9402	74.9892	65.6908	97.6724	101.826	124.603	54.1991	50	57.8581
lyrm5a	139.47	257.804	178.587	126.743	133.122	191.074	101.337	97.8558	130.316	164.093	144.174	104.789	131.219	99.7616	11.5952	15.4214	11.9298	10.3771	15.9612	10.7893	16.2957	13.1516	15.9871	181.015	185.61	247.421	240.076	231.531	258.68
dhrs9	139.266	99.6495	94.1448	125.702	93.6213	134.391	67.6839	72.9257	94.8772	89.7066	84.8991	80.6807	72.3944	61.187	0.618153	1.17527	2.12207	0.296557	4.44053	0.214397	2.10642	5.2723	3.40063	88.5532	107.645	147.789	95.4969	74.0916	95.8208
ell2	138.95	168.932	14.7926	16.4641	19.1379	35.2221	1.02177	1.05633	1.767	4.20963	2.54722	0.70729	2.1402	2.11085	161.288	121.081	137.839	129.325	121.839	112.045	181.063	196.958	141.416	100.769	104.647	133.231	1.08523	2.32853	0.968696
LAMP1	138.744	134.931	142.185	144.765	95.448	199.711	55.5067	52.354	71.524	73.5847	73.3107	43.6653	45.9307	26.7347	21.388	14.6293	21.636	14.876	20.2733	25.7507	31.9053	23.708	14.5253	29.2307	32.4573	58.8853	54.0753	54.276	35.596
olah	138.19	116.683	112.991	106.939	101.442	105.717	51.1814	49.9082	35.374	42.8821	28.5186	58.3141	58.6996	53.8735	3.16038	15.85	24.4083	17.1772	21.3786	15.3671	24.3046	17.5675	17.4282	10.2696	127.266	180.176	115.118	116.212	115.92
dcxr	137.557	142.042	169.552	125.715	105.34	143.403	71.4563	68.3872	124.542	120.871	128.718	74.2118	67.2105	64.4502	12.1468	12.7049	18.6742	10.6075	17.4045	12.8271	16.9184	19.5645	15.9013	281.482	279.095	383.421	450.344	403.044	400.416
slc1a3a	136.774	111.691	88.7038	355.417	348.173	335.576	35.7247	27.2587	48.9192	54.6281	61.2736	20.9443	20.8576	19.4963	0.21666	0	0.937818	0.611654	0.481815	0	0.426281	0.675792	0.179116	69.2225	67.2994	76.578	9.54087	11.1246	9.92726
Metazoa_SRP	136.475	382.1	179.448	179.612	104.977	67.9866	207.896	268.89	149.478	156.605	229.615	395.054	396.528	268.348	0.926421	0	0	0	0	0.548495	0	0	0	0	0	0	0	0.024743	0
zgc:171566	136.144	192.562	183.787	791.189	747.006	849.487	20.0352	18.7168	17.0874	17.71	20.7617	15.8213	11.2998	11.4434	1.02441	0.743164	0.175781	0	1.57617	0	0.597656	0.569336	0.456055	242.177	261.93	333.827	80.5557	79.8672	77.6626
RSL24D1	135.643	168.257	129.771	213.282	248.174	264.446	63.955	80.6933	65.1033	82.5644	115.929	83.8349	116.839	84.7689	266.649	263.635	329.014	268.383	226.195	248.049	308.463	364.454	318.603	330.173	292.7	419.926	335.536	347.949	351.348
dap	135.435	133.916	158.246	258.621	351.5	413.57	82.3364	94.0919	89.1371	103.763	115.847	117.308	107.456	124.868	41.9439	24.8988	37.9626	31.6101	50.6838	47.5654	60.7482	40.5607	49.5919	636.558	673.302	872.541	345.175	310.409	311.1
ATP6V0E1	135.356	152.679	149.592	112.099	94.514	122.626	28.9339	25.9721	69.6515	76.8617	49.9271	29.3855	40.0503	23.5587	47.8189	36.4693	56.8058	46.0452	33.5824	42.2309	75.4986	41.0289	47.3535	34.1034	49.8514	62.8142	51.8869	57.993	65.2556
amacr	135.328	118.38	196.686	162.84	111.465	109.798	30.3819	29.7596	57.957	67.7755	77.6928	36.9864	51.6509	37.0385	29.9691	21.0958	29.8506	22.8438	32.6053	22.0792	31.3343	36.9125	23.1615	117.273	124.177	172.334	141.106	142.547	130.936
pipox	134.857	156.718	172.376	55.1912	25.596	71.359	50.8674	51.1964	52.0433	42.3463	45.4022	47.9139	50.814	52.882	0.908699	1.37898	1.32472	0.695952	2.41947	0	3.40569	3.1503	2.37812	47.7778	44.3066	76.3994	140.425	145.79	135.337
hoga1	134.318	145.924	160.503	172.519	48.1577	166.908	35.3289	53.0418	69.1009	69.6222	78.1271	58.2667	72.5889	58.5391	2.65956	3.35644	4.56311	3.26	4.21333	3.90711	4.35156	5.59911	5.03467	153.369	159.548	244.032	220.195	224.082	200.323
spra	133.827	113.512	124.717	184.363	194.183	149.507	52.8344	45.1227	100.126	106.066	129.253	60.3138	55.5272	55.9988	15.542	7.91516	12.771	10.0148	12.2051	10.5791	24.6656	13.7578	13.402	152.814	153.428	215.474	132.337	134.988	128.863
psma3	133.49	139.298	160.385	115.399	131.507	120.397	44.2332	38.0155	75.688	100.339	84.1415	51.259	67.9162	68.8146	50.4154	48.5323	63.3114	45.3818	53.8101	48.23	62.203	71.2586	48.4935	111.495	109.772	193.617	173.208	160.432	174.822
EEPD1	133.457	246.501	171.402	150.61	17.9556	71.1204	35.2709	23.2925	68.7913	87.7168	98.9778	44.9562	48.4877	36.6003	1.03904	1.82703	0.960961	0.632432	2.64925	1.08288	0.91952	1.85165	1.99459	22.8105	22.0985	29.6559	45.4183	51.6613	35.2682
pcbd1	133.406	149.144	115.334	478.026	300.332	223.516	137.355	175.894	282.311	268.141	244.741	177.558	307.513	277.53	3.3932	0	4.26475	3.51816	6.23625	0	19.5385	11.5212	11.1603	231.373	270.891	1469.17	1348.19	1341.16	1211.95
GCA	133.245	173.744	158.822	44.1131	111.359	111.123	14.0746	11.7945	107.016	2.90816	3.76863	16.8063	14.2146	14.3916	1.94618	0.321451	1.48436	3.65203	1.78775	1.25538	14.876	1.94816	1.72694	0	0.027507	1.60449	0	1.27837	117.887
atp5pf	133.007	157.114	175.322	140.533	103.765	119.804	54.4205	69.9782	100.346	87.1983	115.129	60.7451	95.5643	66.146	321.745	299.914	458.736	292.418	367.042	305.169	478.007	423.244	435.054	111.688	144.108	199.24	201.105	170.926	183.795
ccng1	132.71	155.977	136.912	163.685	138.047	199.79	47.7062	32.7738	72.424	68.198	72.9281	37.8333	34.4337	35.1579	110.645	63.8553	105.001	76.3422	82.4825	76.9569	104.571	86.3561	66.6495	66.1125	74.8325	109.389	86.6176	95.8099	79.8012
zgc:112271	131.6	126.988	141.005	172.681	155.275	176.442	28.4966	27.9477	41.6917	54.3344	35.6823	38.9437	48.3626	33.3137	19.311	7.89209	15.6662	12.2131	17.1542	14.4196	29.9866	19.9893	21.0349	109.25	122.245	154.133	149.322	136.2	133.153
pla2g15	131.142	158.678	12.07	137.906	18.1946	146.674	35.1662	34.1819	50.7962	67.901	14.0772	4.00999	2.43187	36.407	3.23789	1.58209	2.03172	1.77	0.791757	2.16547	2.9174	1.60409	3.43424	127.238	132.992	189.282	131.435	141.363	127.724
pgrmc1	131.104	208.263	161.159	130.461	101.759	136.722	45.6354	42.3557	49.5923	60.5223	53.7798	44.1533	45.7768	40.0283	13.2812	11.7649	11.0015	15.4554	10.3393	11.7485	12.7321	21.3229	13.4673	59.4673	63.067	102.619	106.307	113.482	110.763
fam210b	131.09	126.952	142.685	241.375	215.732	323.796	46.7861	49.2962	69.3859	72.2805	83.1159	50.5954	47.2857	48.712	31.6298	26.3351	37.3919	21.1855	30.638	23.2349	26.4181	27.2939	28.7734	98.7532	93.5011	119.942	58.3194	57.4667	61.0292
cbr1l	131.082	111.069	160.716	1.64391	116.343	208.832	1.36983	0.973347	0	1.35732	218.559	131.691	0	1.42417	0.969809	1.05365	0	0	0.166853	0	0	0.812401	0	285.923	243.727	379.747	258.334	271.756	277.69
lamtor4	130.795	129.343	138.244	77.5107	55.9536	101.596	38.0804	39.3464	62.3982	64.975	81.2821	41.075	45.1661	41.4348	64.9196	51.5643	68.3402	53.675	68.9616	58.3482	91.0429	72.5821	80.7214	79.4	74.1714	80.3089	96.233	89.4196	85.8991
zgc:85777	130.153	95.9141	101.967	113.638	95.788	145.568	47.3033	38.2776	76.5579	71.1083	72.4552	46.8838	48.9172	43.2675	68.9206	62.593	98.9987	68.5896	99.1553	69.6278	83.5488	80.9151	66.7174	112.025	113.256	157.256	130.306	100.969	99.5973
tlcd4a	128.872	103.857	102.649	64.0602	18.5884	57.9777	16.302	18.9862	87.1769	95.784	102.367	27.929	26.4212	26.4645	1.60891	0.310469	0.547533	0.543923	2.27557	0.44284	0	0.872443	0.305656	8.76775	7.07581	8.82912	10.1059	10.2359	10.728
h2ax	128.848	188.669	241.489	75.4056	77.7902	80.648	68.9604	74.2308	152.252	137.478	148.177	94.0256	109.217	90.2051	71.0932	62.6737	81.3776	67.352	77.8835	77.9231	193.851	79.9184	104.082	75.5688	69.9977	120.681	188.867	153.953	184.14
pnrc2	127.866	110.52	163.732	125.856	117.062	190.437	73.949	60.7728	121.089	126.633	153.783	62.3142	44.3907	42.7962	32.6645	17.5138	24.9363	23.7028	23.4204	24.0807	31.8089	27.1529	17.4883	65.9193	77.7325	98.6582	84.1802	85.4926	72.4926
GATA6	127.823	129.073	151.785	110.331	65.0224	136.164	41.3792	35.2094	71.4443	89.0458	96.0031	44.7346	40.2958	30.0633	0	0.154687	0.265104	0.2125	1.64792	0	0	0.440625	0.385417	51.5865	44.2667	57.5018	35.6542	32.8594	32.9891
glrx	127.124	141.648	156.503	225.94	222.471	236.456	50.5527	37.1436	62.8801	75.1278	89.6883	50.3053	52.1273	50.1038	28.2385	16.7903	24.9583	15.1059	20.7426	15.3277	30.5557	28.1002	17.0135	120.468	121.677	167.006	99.8214	84.0601	90.4246
hoga1	126.814	153.032	147.915	159.342	104.254	158.025	53.4542	45.4356	47.2489	68.3798	75.38	67.5698	51.1118	49.5996	4.69644	4.33333	4.37911	3.04044	4.42667	5.00444	3.30355	3.46356	6.51555	119.54	123.286	182.237	152.191	134.49	161.17
ONECUT2	126.701	113.242	99.0224	141.989	145.999	179.596	37.4241	38.1236	72.6332	85.0303	102.959	43.729	34.26	33.9195	0	0	0.213675	0	0	0	0	0.393162	0	24.6863	32.3486	34.1699	14.2375	11.0093	17.3006
AQP11	126.346	97.3932	149.113	115.355	71.3901	108.531	38.3773	35.7228	27.022	37.2338	42.2096	28.5421	23.8431	24.7204	9.16117	7.37973	8.21001	6.85714	5.75458	7.98901	10.5665	6.33822	5.40843	53.2125	60.8333	55.0171	70.6062	64.5397	62.4725
mlrn	126.286	211.829	175.464	157.555	186.627	174.684	60.6134	58.0043	96.0575	147.079	138.95	84.8733	78.0948	70.0586	309.258	230.021	321.015	272.473	291.341	254.92	366.139	341.491	290.592	167.453	189.463	252.269	215.317	195.076	190.86
HNMT	126.282	109.474	126.431	6.7087	0.430166	0.691189	2.12885	1.88237	1.84787	3.11814	3.57646	1.47502	0	2.53409	0	0	0	0	0	0	0	0	0	0.578606	0	1.37515	0.260544	0.911137	0
psmg1	125.959	199.924	223.553	162.623	140.259	213.751	29.1897	36.4303	69.5219	94.6105	84.1654	39.1132	50.2962	43.9467	22.6485	32.1622	35.3303	24.1215	27.0952	24.4737	31.3679	31.5337	31.9926	38.7277	36.5596	59.8178	61.7927	63.6469	56.1912
dio2	125.447	178.787	138.317	19.7284	17.3862	39.4338	17.5451	12.3843	20.3298	14.612	23.2808	28.6867	17.7841	14.0541	0	0.281264	0	0	0.102611	0	0	0	0.352726	8.11086	9.1782	11.2359	19.8168	21.3307	20.667
txndc12	125.195	163.867	167.675	170.787	2.0306	2.0769	0.776958	0.091435	0.447345	0.793014	110.793	0.266796	0.336988	0	0	0	0	0	0	0.265612	0	0.327833	0	0	0	0	0	0	0
rrbp1b	125.192	299.094	259.495	356.904	339.5	225.969	123.841	54.5772	234.492	104.122	319.615	128.136	108.082	102.249	0	0	0	0.78614	0	0	1.58379	0	3.84003	202.827	225.674	248.009	32.6447	57.5192	36.4608
psb4	124.429	108.182	146.504	99.7373	133.509	85.3195	43.3746	39.1064	68.1015	75.8503	79.1057	59.1846	66.8179	55.9247	98.449	60.3904	116.115	72.0901	94.3572	82.2382	130.951	101.636	96.8825	169.211	175.882	250.961	197.383	189.763	184.909
rbm4.3	123.995	140.016	150.329	116.681	92.945	79.2949	38.6261	35.0655	59.5541	68.9032	86.9406	45.419	46.8125	38.5939	42.4792	33.2668	45.3991	32.8186	39.512	38.3704	64.2475	52.804	37.2668	69.624	57.426	75.0281	72.3417	76.0357	71.2888
zgc:103559	123.967	258.113	106.147	137.314	115.479	157.21	33.9688	23.1997	13.2325	141.46	136.44	38.8156	16.9744	16.3092	0	0	0	0	0	0	0	0	0	23.836	19.2959	117.961	258.4	245.69	10.3139
ccng1	123.843	139.525	127.012	220.021	204.998	432.741	66.4585	72.3559	117.387	118.413	157.248	77.9416	107.873	90.548	4262.81	2624.63	3652.61	2924.55	3248.32	3256.71	3695.27	4427.52	3637.48	114.044	111.876	162.135	120.468	105.34	103.126
pm14	123.819	160.026	131.96	163.538	134.793	168.388	27.5385	31.3328	31.0495	40.582	40.2442	35.0699	39.78	43.2409	67.4059	44.2068	66.731	50.6892	48.5952	60.8526	67.3993	80.3124	63.3366	123.965	116.905	144.391	139.685	117.975	129.195
syngr2b	123.732	174.835	0.371335	0	10.7017	128.264	0	0	27.2967	0	0	0	0.717496	0.299595	0	0	5.33657	0	0	0	0	0	0	0	0	0	0	0	0
mpst	123.425	157.138	171.675	111.6	70.2452	71.2037	28.5415	28.6835	40.5292	48.3333	49.4635	46.9944	46.9254	40.5853	8.91639	13.8833	17.2514	9.86925	9.50954	9.96633	17.9125	14.3636	15.4057	50.4708	49.2026	68.6165	109.143	105.04	98.4776
adi1	123.242	142.757	143.111	178.446	81.3469	154.541	14.5393	25.1281	40.1584	41.444	42.1755	26.1828	38.4647	30.6835	42.5894	35.8944	47.4274	41.7367	43.1426	39.2174	51.5567	46.0823	48.1921	70.0287	65.7101	93.2079	107.727	98.0118	112.828
oaz1a	123.109	164.955	100.19	133.161	187.718	178.398	110.025	125.744	284.936	279.499	343.557	101.387	146.315	130.799	42.8219	41.0808	40.5938	31.5485	50.6326	34.8309	52.1442	28.2204	43.3929	230.921	0	326.483	240.05	235.804	228.927
rhoca	122.87	127.667	129.194	122.962	123.839	121.532	26.2439	23.2342	54.9386	43.859	14.0813	37.8536	43.0191	33.0719	21.4132	21.4567	17.5226	14.2453	17.1895	17.2664	20.971	27.9837	22.2672	14.2483	11.1745	104.558	15.6525	15.3063	67.0872
os9	122.823	268.855	256.979	23.6149	377.814	3.68746	11.5941	34.8241	40.4632	127.23	115.08	0	5.28959	6.29315	0	0	0	0	0	0	0	0	0	389.173	152.709	211.989	195.293	131.554	0
LAMP1	122.757	211.281	149.121	166.797	164.001	222.013	54.6237	53.8477	72.2785	94.8487	89.5924	64.1443	55.5802	41.6419	30.2644	31.8297	35.414	23.3641	29.0802	27.3856	33.7513	31.8241	25.4102	127.881	109.549	141.595	101.525	114.996	94.9422
ndfip2	122.683	12.4124	13.7529	1.54799	3.17914	72.756	0	0	0.65905	155.53	0	0	0.766132	0.439391	0.395397	0.524654	0.919635	0.258333	0	0	0	2.05918	0.535877	0	0.690659	1.74921	1.08267	1.14733	0.295728
syngr2b	121.767	240.45	214.934	371.913	132.698	347.569	56.1158	49.1764	103.709	105.41	101.791	52.187	45.8687	44.0007	213.411	143.492	219.054	155.635	155.952	168.09	204.249	205.84	117.851	51.632	55.8109	68.301	32.508	30.724	32.4
fa18b	121.701	119.157	141.931	30.6337	37.4513	27.034	34.0622	37.136	18.5514	31.3735	11.7717	32.6094	44.309	32.0382	13.1552	2.60086	2.65325	2.38507	11.5149	14.4601	20.8811	2.16795	2.78153	153.777	161.832	203.402	5.19351	13.7254	61.8757
prr15la	121.436	190.1	193.648	156.403	90.9788	247.997	41.9879	52.1091	57.7	81.1939	76.9121	34.0909	52.1606	24.1818	0	0	0	0	0	0	1	0	1.9	64.5303	58.1606	75.8727	58.4788	73.6758	75.6576
fkbp5	121.341	151.055	129.314	649.06	1705.12	1449.33	42.9436	43.8656	61.4568	76.6087	72.887	23.8455	22.4952	19.1132	35.1182	75.6077	77.2605	26.5266	12.4398	18.8515	8.57844	14.2302	9.92036	211.202	224.863	298.073	53.1111	61.6299	49.4865
oaz1b	120.616	155.091	160.112	125.333	117.162	137.344	74.5377	59.857	164.365	193.006	185.072	82.2503	100.857	76.2516	68.295	47.1852	68.6271	44.0313	58.2625	65.6137	98.9757	63.8978	57.8761	77.6967	74.1092	109.768	72.7382	93.4891	75.6999
ifit9	120.537	1.1321	0	0	0	0	0	0.138659	0.972229	0	0.47992	0	0	0	0	0	0	0.764923	0.06601	0	0.477508	0	0	0	0	0.351082	0	0.719583	0.226875
pycard	120.312	101.448	128.713	39.6537	38.9769	52.7011	12.9332	10.9672	17.7224	10.0401	22.1531	12.1993	19.9137	12.3888	21.9417	12.8651	18.3767	15.0899	14.5705	18.8104	48.0134	16.5954	11.7388	27.5018	27.4897	38.7205	28.4982	31.4714	25.8372
nudt5	120.085	1.54739	140.431	0	0	0.994611	0.639505	0.219452	2.499	0	0	0	0.165056	1.09288	0	0	0.330896	0	0	0	1.14508	0	0	101.213	0.549835	1.36898	0.673088	0.877586	0.510735
gltpd2b	119.685	118.807	199.464	138.479	59.984	173.103	37.4316	33.4391	81.1571	85.516	76.6432	42.2703	27.7863	28.9284	0	0	0.303419	0	1.57479	0	0	0.621795	0.922009	91.8098	101.849	120.175	80.0737	92.344	84.078
hsd3b7	119.388	131.234	74.0839	174.261	132.619	358.686	46.1733	40.6242	79.3545	88.83	90.3664	57.4582	60.2065	48.6584	9.06031	8.48549	10.0325	5.40719	8.09529	5.25118	8.8335	7.50205	6.87608	52.7499	65.1113	81.7397	48.6754	44.8201	46.5114
ntsr1	119.362	99.1147	62.0188	101.573	69.8853	144.069	29.5768	32.5761	81.4655	82.2904	90.9983	52.8317	39.715	38.2938	0	0	0.529175	0	0.615694	0	0.144869	0	0.498994	47.9175	41.6271	59.9168	20.5473	13.6211	21.5922
IGFBP2	119.34	143.004	136.535	124.795	101.762	148.59	193.109	241.554	299.355	330.639	318.799	263.563	218.749	199.507	0	0.068495	0	0	0	0	0	0.651333	0	0	303.009	396.536	223.586	205.37	216.85
allc	119.249	104.133	10.0338	0	0.268209	1.49406	0	0	0	0	0.772963	0	0	0	0	0	0	0	0	0	0	0	0	0	0	0	0	0	0
DNASE1L3	118.992	189.912	153.538	47.1376	46.512	92.6668	16.7748	12.7884	42.4565	25.2359	24.752	12.7609	20.0506	16.9023	9.95685	10.5062	10.1181	5.24757	9.45782	6.41856	8.98929	9.32447	2.67424	19.1314	19.538	27.7888	57.1123	42.7229	46.9916
tapbp.1	118.768	74.1642	220.498	43.2165	26.4402	58.3395	12.231	11.2906	16.062	17.9041	18.5138	12.1027	15.1453	10.414	20.5821	20.445	21.3908	20.8731	15.5123	16.4663	40.8758	22.4044	17.6697	32.2944	27.6402	36.5961	31.3438	33.4	28.7593
nupr1b	118.747	49.4286	106.275	161.462	10.967	42.6264	83.7271	111.2	66.6264	47.8608	66.0513	140.201	116.214	111.238	0	0	0	0	2.30403	0	0	7.96154	10.2271	226.74	171.863	261.167	1086.92	1090.02	1100.7
dlst	118.681	157.809	127.886	121.345	91.7141	156.222	48.612	42.0407	85.5689	114.414	97.5082	64.3795	60.849	53.4137	19.0998	18.8739	17.1291	15.7299	19.9791	10.7635	23.651	23.3533	15.2394	102.394	95.29	134.489	122.664	119.205	108.349
st8sia6	118.619	163.136	151.692	134.868	119.497	168.741	52.3254	56.6654	104.053	108.154	125.056	64.339	84.7645	71.3821	30.201	24.9744	34.6214	32.8893	32.3777	30.4044	35.0597	49.7053	32.0637	108.345	95.2959	119.413	80.4155	73.5592	67.6611
wsb1	118.325	126.714	113.535	173.446	291.294	412.34	19.5209	17.9589	48.7699	54.2027	51.8692	14.3932	26.0374	19.1489	3.55319	3.80142	3.18203	2.38062	4.55398	2.09377	5.3223	3.36801	2.25177	27.2175	28.4515	46.2857	16.2226	17.1474	21.8467
selenos	117.536	66.6633	104.156	346.054	410.763	423.522	20.4993	20.8514	54.5464	51.197	55.3085	21.87	28.9175	23.6909	27.2414	20.4336	31.707	23.3036	24.8301	27.4598	35.3612	27	24.4075	272.317	296.902	395.794	85.2765	92.5258	95.1193
stra6l	117.096	103.428	103.953	0.418615	0.455624	0.326079	0	0.103147	0.625107	1.72045	1.55387	0.080411	0.080546	0.116263	0	0	0	0	0	0	0	0	0	0.108899	0	0.174595	0.0995	0.112496	0.12742
nr1h5	116.884	125.43	105.609	129.226	52.3315	82.0131	31.2302	30.1093	54.6374	59.0276	58.3078	34.9727	30.1604	29.5772	0	0.353519	0.362171	0	1.11836	0	0.31105	1.33858	0.400708	41.5423	52.0435	61.0229	31.084	34.1337	29.023
dnaja2a	116.699	144.541	166.149	147.482	155.544	225.5	35.9787	40.9953	67.725	82.699	78.3772	41.0004	45.509	41.8615	71.7107	66.1598	76.7547	55.026	64.1277	61.1962	99.4416	83.4203	64.4322	135.076	140.411	203.726	127.705	121.424	132.868
manf	116.641	113.537	167.493	772.784	1131.89	612.004	16.4212	10.848	21.9817	64.5385	84.5101	34.0751	30.8031	25.2143	31.0989	28.3416	23.0476	32.9277	45.7299	21.7454	34.0522	33.9212	24.0559	558.987	592.881	801.541	47.2592	61.9698	50.1996
pink1	116.555	108.994	134.133	123.574	78.2783	106.484	44.0012	41.1194	73.6107	78.9645	85.2892	38.6577	51.0257	40.5216	124.912	95.8913	148.99	101.714	125.541	108.828	159.159	134.044	111.15	129.718	114.86	149.811	162.52	141.872	137.254
HHEX	116.54	124.578	192.161	443.278	268.751	448.439	44.3828	32.2809	50.6988	61.7591	55.8239	36.3875	35.9611	26.5188	4.06655	4.53239	6.553	6.92226	8.88575	6.93286	3.52945	7.72674	4.93875	110.565	112.092	141.436	100.595	87.3463	87.7173
bnip3lb	115.411	107.705	119.575	102.57	126.78	207.842	21.9769	26.9089	29.6649	20.394	32.6487	16.9665	18.8608	15.6101	339.123	215.491	312.719	223.43	219.505	224.926	247.705	316.741	262.993	62.9804	63.6756	87.9025	61.5972	61.4361	50.5642
hint3	115.257	135.961	101.612	121.221	87.8319	144.129	18.0658	17.0596	30.3108	29.4236	29.7598	16.7714	21.3513	17.4851	12.365	12.6254	21.1768	11.6302	14.0423	13.147	18.9568	16.2939	14.0106	93.8108	96.9789	133.824	110.881	125.092	125.947
cotl1	114.728	98.6154	125.634	60.4899	23.9132	57.1422	19.3869	18	18.1617	15.304	35.9627	21.8508	25.2005	21.3007	25.5408	16.7063	33.7902	25.0793	29.1259	23.3357	48.0629	24.4172	26.2681	14.0746	20.6853	19.4779	19.0373	19.5361	21.3986
abcd1	114.341	96.237	99.8053	98.484	109.858	132.026	12.8219	12.4987	22.6603	30.1078	27.4452	13.5506	13.9575	11.5464	3.72843	3.16163	5.65353	3.49803	4.21266	3.26894	7.41086	3.56636	3.13965	7.13929	9.65243	12.5602	6.72317	11.0355	9.29041
alg12	114.34	82.4616	99.4802	174.064	166.39	167.473	18.3824	19.6849	30.1153	36.9347	38.1157	21.3369	19.5596	18.7868	8.1911	6.78869	6.52644	4.81518	6.86407	4.02935	5.97868	7.40478	6.14404	76.008	76.9799	100.46	28.2713	30.2505	36.4217
selenbp1	114.325	104.998	0	30.6508	0	0	1.95562	26.6613	0	0	0	0	0	0	0	0	1.10319	0	0	0	3.36837	14.7679	0	0	0	191.678	0	0	0
abracl	114.312	145.498	121.082	118.19	78.0187	106.259	25.9533	23.2944	22.7418	34.6297	27.7786	20.0596	23.9743	19.8516	19.2886	12.5736	14.2278	14.7161	9.61624	14.6764	49.4498	10.4182	8.73949	35.6028	43.7699	49.0619	31.3949	34.1192	26.2874
cxadr	114.15	111.09	122.077	117.405	69.929	113.198	37.3497	37.2903	45.6621	46.851	52.0897	33.9724	33.0421	34.4986	2.95862	2.76552	3.9469	5.4931	2.75586	3.2869	5.96621	4.70897	4.51931	52.8745	54.491	69.6462	50.1517	59.8855	42.9324
arhgap35a	113.951	156.222	147.824	110.675	60.1827	113.16	28.3906	28.4922	60.1919	57.6585	72.0518	37.866	33.9064	29.6267	4.33854	3.17131	4.12248	3.8795	4.57495	3.34784	5.53558	5.12848	3.28405	27.0001	25.7021	32.4453	18.2971	18.1387	16.8455
c1qbp	113.856	127.812	140.397	204.392	230.364	151.849	31.6329	45.1137	79.7618	105.611	97.0984	66.1025	63.2866	56.3863	85.7191	90.4932	106.21	62.8669	81.5914	80.1826	92.7945	102.655	78.8046	66.9499	82.3848	118.511	72.8176	77.4977	76.4504
mrpl33	113.634	151.109	190.443	149.137	104.612	130.874	56.4262	38.5519	39.8033	46.6393	57.8798	36.7158	52.7814	50.5137	35	34.459	42.306	33.1694	25.1967	21.5847	50.0219	38.918	35.6612	59.776	45.2295	61.7213	85.7705	77.9727	92.0546
lrrc58a	113.125	112.769	117.617	57.521	41.5772	119.592	29.4124	13.9631	24.9256	10.6221	12.7045	26.0735	27.2017	11.7695	0	0	0	0	0.314678	0	0	0.172164	0	11.2729	62.8264	14.0534	15.9443	15.314	56.3404
lrrc47	112.317	126.512	106.139	168.381	173.158	263.182	57.2583	55.1544	130.134	143.159	120.064	51.2802	72.1961	60.1752	67.8803	72.0901	76.6054	61.5551	55.9702	65.3369	74.9855	89.7	76.7879	41.1855	44.0841	68.8759	37.3069	36.4538	35.8758
ponzr1	111.88	98.673	96.2195	63.5598	17.3461	32.0229	13.5089	11.1832	19.6361	25.4529	34.4364	14.6412	19.0433	13.7455	7.30025	3.90076	8.16794	8.82188	4.26972	7.7659	27.7913	6.91221	7.45801	20.5114	38.1247	38.4631	20.0712	21.2723	17.7964
st3gal-i	111.787	152.801	68.5208	24.4028	67.5445	173.522	18.1948	15.8431	40.8696	35.4088	53.6633	21.9075	31.7986	27.2299	3.56635	1.12586	2.63399	1.50642	3.02954	3.81507	5.85317	4.15882	4.02397	12.0869	9.77312	19.2504	18.0473	22.0672	15.0334
foxp1a	111.709	105.152	112.305	74.6971	25.5219	49.9709	28.3314	32.4218	51.1218	56.3698	58.4647	35.7577	30.3924	29.2077	7.34884	6.28462	8.27696	6.61205	6.35677	3.70349	5.91517	7.70534	7.37949	24.9672	22.634	33.4423	55.0457	48.9165	56.5116
rnaseka	111.611	91.4673	75.5752	118.824	104.549	96.866	24.6699	36.5458	51.6111	54.2026	52.4967	31.4542	36.116	39	64.0915	48.7386	87.0229	63.7157	55.4739	67.0196	90.6569	63.3791	77.6634	133.804	131.559	229.436	144.944	156.833	162.186
bambia	111.364	117.341	94.0847	79.2804	26.4761	61.1575	53.3449	59.4523	117.049	125.458	113.257	82.2208	78.9618	84.8329	1.66945	1.04177	4.45823	2.85441	3.57041	1.13485	4.40215	5.44869	1.6074	23.6181	24.5095	32.5286	32.5191	25.2446	32.1002
cox5b2	111.159	126.021	120.27	73.5198	42.3862	75.7292	87.4149	103.405	77.3516	94.6667	107.338	75.7995	107.945	91.6884	1533.63	1262.06	1909.25	1269.23	1674.56	1327.26	1810.92	1924.38	1782.1	608.585	689.391	1036.7	1139.2	1118.64	1171.14
ghitm	110.925	103.017	79.9468	204.695	420.905	342.861	41.3718	40.3722	68.2974	74.8433	81.627	42.9229	42.7025	36.082	126.337	104.084	145.733	105.293	107.833	95.0077	141.558	134.866	120.784	171.259	168.819	259.896	173.898	166.813	164.024
gch1	110.739	89.754	71.7819	152.775	98.1145	234.707	51.4655	49.5528	89.1365	87.2354	83.3457	46.816	58.156	52.2735	0	0	0.742021	0.394504	1.47163	0	0	1.34929	0.482269	89.3972	92.3533	99.0824	117.026	114.618	109.256
ciao2a	110.087	146.878	128.959	168.976	152.096	195.546	28.2244	26.8766	39.1168	28.1627	29.1759	29.9895	29.9685	30.4322	19.0289	10.8281	25.1352	13.4619	12.3263	15.4357	25.2493	12.9711	9.14436	70.4108	67.5206	82.1654	45.1168	62.5236	51.5079
PTGR3	110.06	114.325	122.21	91.3613	32.2953	86.2816	28.9828	29.467	75.9348	69.4636	64.4203	45.4162	57.9505	49.6037	12.1861	10.6751	12.6106	11.9251	12.1099	11.2184	13.3242	12.7637	11.0694	51.6058	50.7466	75.8269	74.7843	76.2885	76.342
laynb	109.895	108.99	96.6307	99.0812	40.7652	147.79	11.4356	13.0893	25.9036	28.8752	27.4609	15.1682	10.0845	14.1524	6.203	8.20715	8.65956	5.32425	7.6718	5.94036	6.14968	10.5231	5.83057	44.39	43.9388	70.5195	22.5375	24.7006	25.1863
ndufs7	109.685	0.725615	1.01478	0	0.599496	0.796376	0	0	0	0	0	0	0.27205	0.241592	0	0	0	0	0	0	0	1.38778	0.881514	0	0	0	0	0	0
dlc	109.407	112.988	100.534	37.7931	3.42347	172.481	10.0451	13.6723	33.2498	36.5574	30.8095	12.6647	15.4569	37.0918	0.104925	0.059216	3.85133	1.0261	0.815935	0	0	0	1.67984	27.6584	14.2097	16.8621	38.108	14.461	24.7524
CNN3	109.062	132.447	121.331	157.446	1.15891	191.246	0.287566	0	1.81025	3.17989	2.22159	0.498201	0.707798	0.189311	0	0	0	0	0.409933	0	0.476001	0.122371	0	0	0	0.334735	0	0	0
gchfr	108.792	81.1714	109.36	74.5868	48.9407	124.543	26.6901	23.2291	33.9275	29.4923	22.4857	22.5132	28.9363	25.35	24.8703	19.1978	34.4934	21.2505	25.8516	25.0857	25.3758	39.3824	28.3879	88.4758	107.744	125.565	66.2945	82.7176	67.0747
ubxn8	108.646	123.964	0	11.5003	10.4086	119.692	0	0	0	0	0	0.477144	0	0	0.529711	0.423069	0.113289	0	0	0	0	0	0	12.216	0	18.3408	0	1.43616	0
limd2	108.467	88.2773	140.71	84.3892	65.7037	166.413	14.5442	15.4773	31.2487	34.1019	44.8052	24.7357	28.9978	27.7325	1.72119	3.57546	3.17955	2.2171	2.0513	2.07212	5.76066	4.2483	3.23978	63.783	61.7078	76.2078	66.2342	61.7349	64.1781
cox6b2	107.764	162.116	120.956	90.1017	106.964	117.328	52.5549	71.6326	70.5271	73.6818	93.8387	78.088	94.3657	90.4398	190.144	131.957	220.604	138.867	229.182	155.402	228.264	210.701	198.623	105.931	91.7878	133.034	151.593	153.235	146.747
b3galt1a	107.665	124.082	175.974	187.383	120.943	210.517	48.9253	49.5394	114.38	84.5697	92.9111	45.8616	37.6141	40.1101	0	0	0	0	0.938384	0.244444	0	1.1404	1.30505	141.705	144.998	179.398	66.6343	57.1596	56.35
dcun1d5	107.664	107.656	91.8993	78.5648	66.3804	99.3816	27.6237	31.811	30.073	26.3693	35.7073	22.47	20.5771	19.5807	45.7951	28.5689	46.5533	41.4965	37.2473	32.1372	45.4282	64.3975	38.3681	78.798	108.005	138.318	132.019	118.511	143.603
sdr16c5a	107.524	111	138.094	113.744	118.04	113.243	31.0112	26.9554	104.154	147.873	144.562	112.846	17.141	15.9103	0	0.95582	2.19418	0.857858	0.648964	0.72605	1.42113	2.03314	0.783293	166.751	172.723	228.804	509.976	481.466	497.26
scrn3	107.361	107.054	120.618	95.353	153.72	136.12	31.6715	40.2104	47.7017	51.7363	68.4388	40.0836	53.04	40.719	46.8321	47.8415	56.3595	51.0958	45.58	41.4114	57.4625	59.4834	51.402	105.308	104.01	162.064	75.1888	64.4056	71.853
glt8d1	107.02	120.208	107.875	32.0345	14.389	30.6339	13.4867	11.0928	10.0273	32.0667	22.8503	17.0208	19.4576	15.5363	0	0	0	2.33595	2.16029	2.64289	0	1.24618	1.24062	59.9843	12.1585	6.84999	91.5678	109.855	108.04
BPNT2	106.765	113.273	97.5034	228.281	230.956	220.885	19.3596	19.4801	40.6686	48.4135	45.172	20.4742	20.7959	22.0039	16.7653	11.1438	14.4077	12.4057	12.6783	14.5734	20.2575	13.4762	13.5811	101.582	92.3878	109.31	35.6574	36.2653	27.4271
ndufb1	106.415	168.34	171.705	145.57	123.255	189.97	53.0304	67.7247	84.56	112.482	112.894	70.1368	116.831	104.249	142.719	118.216	175.293	123.945	162.604	125.598	148.42	182.353	179.019	69.5304	80.4189	139.016	121.321	125.601	110.756
traf2b	106.182	1.30028	2.54463	1.05974	143.668	1.1141	0.092501	0	0.466717	0.277914	2.7918	0	0	0.213591	0	0	0	0	0	0	0	0	0	0.043461	0	0.081645	0	0	0
tex264a	106.055	159.259	125.227	174.735	129.875	146.766	26.6347	26.5261	40.7004	57.5449	49.6086	28.0938	25.7058	25.439	3.43968	2.88673	3.64075	4.2996	3.72319	2.16153	5.89812	3.687	1.85121	58.1354	67.0543	78.5858	55.3465	55.3365	52.1662
zgc:158868	105.492	169.703	145.167	0	0	170.83	11.3961	31.8877	11.7117	0	18.0251	18.4727	10.4868	11.9836	0	0	0	0	0.232663	0	0	0	0	101.841	0	156.308	175.394	142.402	160.947
eif4ebp2	105.445	113.664	98.6106	98.9076	107.563	124.07	27.0532	41.3193	59.6303	77.9608	79.3277	48.6639	60.5014	42.5546	107.401	71.0924	116.286	73.1821	86.4146	76	134.95	102.14	60.9328	92.9748	124.029	155.861	92.7451	95.4566	124.779
ywhaba	104.814	146.458	0	0	12.9225	14.1307	0	0	15.3746	15.7018	0	0	0	0	0	0	0	0	0	0	0	0	0	0	0	0	0	0	0
F2R	104.252	107.432	112.884	198.524	143.659	232.419	59.2863	62.3666	126.412	150.944	162.124	83.1019	70.8315	57.4881	2.25597	4.43601	7.24946	3.51916	10.12	5.33912	5.61099	7.43167	4.37383	94.0889	98.2813	104.512	24.1656	24.6479	25.0709
nfkbiab	103.785	116.79	70.1074	257.395	187.765	371.787	34.5396	21.5041	126.682	83.7025	131.285	33.5537	40.7194	33.7001	269.917	168.751	249.057	237.808	249.048	249.57	141.162	136.543	135.553	106.64	117.247	180.137	26.8292	35.9308	32.0248
sf3b1	103.43	138.88	120.731	89.2409	67.5423	87.3284	20.4693	16.7561	66.1363	63.8596	85.1251	20.8187	22.4353	18.6075	60.9225	61.2926	68.9502	43.6844	66.8693	42.4599	81.5923	66.8655	47.6496	24.1827	20.388	35.9097	23.0258	26.6149	26.5439
ndufb7	103.146	157.869	163.597	147.334	89.8093	119.496	68.7338	82.9047	64.5	74.1835	73.7689	85.1475	103.063	84.9119	457.478	393.477	568.811	395.714	547.795	415.367	635.409	557.197	546.701	153.497	146.922	236.481	212.329	196.932	186.21
si:ch1073-291c23.2	103.038	121.912	68.2288	210.196	174.863	259.035	116.95	87.0069	125.85	139.382	149.737	102.885	107.145	104.493	50.0075	44.7076	53.4645	37.2263	42.9545	31.0206	39.2643	60.6809	41.207	9.30175	6.56733	9.99875	15.1315	10.2693	6.58603
srp09	103.005	114.34	84.7049	135.175	274.774	316.003	64.8905	60.1088	84.7343	84.9947	70.8692	41.3284	72.8238	54.5127	35.7931	31.239	41.1148	29.3324	32.8425	31.8558	48.9987	49.6742	45.2023	130.872	135.868	204.993	80.1148	75.9186	78.6636
mtpn	102.771	129.324	131.413	0.169449	2.20119	105.247	0.1122	0.350005	2.73355	1.79446	1.87708	0.207317	0.10651	0.10113	0.257235	0.105116	0.605293	0.089208	0.396611	0.145622	0.100131	0.586015	0.257051	0.186844	0.185456	0.100133	0.118492	0.386713	0.130906
si:ch211-191j22.3	102.508	120.865	88.9297	96.3899	87.4021	95.0336	29.9511	14.2905	42.3425	32.9587	44.948	33.5321	36.263	35.8853	15.5963	14.3517	19.0963	8.88991	15.0443	11.9021	26.3394	17.6529	17.7676	76.2263	75.3226	105.74	72.5291	75.5719	80.055
id2a	102.447	83.8855	123.547	34.794	23.3349	36.5663	46.5024	43.7482	82.0301	77.1892	80.8163	42.3048	49.7801	39.0084	15.2964	12.6072	19.7819	10.2482	15	17.8	22.3434	20.2482	9.94217	54.2217	41.3126	55.797	60.4361	47.9181	56.0229
chmp2a	102.224	111.654	93.5701	129.968	103.282	117.866	13.6704	20.0452	33.3092	36.4766	34.6267	27.9744	21.8439	21.9548	59.5385	39.96	61.8929	45.187	39.7783	37.8477	64.7873	57.0279	37.0588	51.3499	48.6606	78.7979	48.7059	48.1968	60.463
atp5if1b	101.87	130.972	110.509	118.37	84.8642	109.528	71.3704	71.0864	82.9599	104.895	98.0108	82.8364	90.2531	76.5231	456.171	371.696	610.85	304.855	461.417	361.69	488.299	473.606	419.045	222.821	230.88	323.376	310.756	287.627	335.657
rpl7l1	101.533	126.582	175.262	197.747	269.53	188.658	58.6971	56.819	144.086	141.095	128.486	56.0841	78.0455	68.1742	66.8946	95.2993	94.7096	71.7297	59.6915	68.5543	97.0905	104.634	96.5101	96.529	98.3459	133.827	58.8532	66.5869	64.3665
hmgb3a	101.167	122.564	151.706	31.3029	30.6273	30.3662	49.8954	45.248	56.3705	72.3491	76.2343	77.8123	71.9609	60.1619	60.7946	44.7681	68.6836	42.5461	58.7732	54.4901	80.2281	72.0349	65.1437	59.3121	66.0622	87.8912	161.386	135.999	136.032
GPR39	101.128	98.4396	119.208	100.94	60.0214	67.7327	31.658	28.7957	44.9028	54.4201	59.9956	32.0611	29.933	22.891	0.544183	0	0.320324	0	0.39838	0	0	1.0972	0.96539	31.1929	35.7518	52.8807	42.8159	41.5228	40.5788
jun	101.023	120.548	133.155	746.01	429.565	799.278	41.1996	24.4041	77.1976	70.5211	71.2655	18.884	34.0256	32.9764	26.3992	25.0698	42.5546	25.3255	32.7099	31.5644	37.3845	42.3972	35.6893	179.36	188.78	245.964	72.6086	69.4543	66.6244
sgms1a	100.717	88.7241	101.018	143.206	93.734	138.215	22.2357	20.2357	54.9718	52.3433	62.5753	26.9402	24.6969	16.1292	4.63711	4.38351	7.47423	4.36083	4.26942	4.13608	5.41168	4.71237	3.5457	28.4	21.8725	41.4646	15.4715	12.857	16.7684
sec16b	100.334	110.13	119.416	131.679	86.1207	143.694	41.3249	42.4678	103.671	108.218	111.473	80.584	77.4103	69.3024	9.76162	5.29345	9.60154	5.30022	4.70362	7.49433	5.92737	8.76345	9.10593	28.4971	33.7956	33.3979	20.1068	19.5776	20.3432
fahd2a	100.189	133.77	153.322	60.8086	33.6104	55.3342	47.3541	42.1994	72.5814	74.3747	72.6333	53.5069	50.7051	55.055	10.8877	5.62605	8.9259	5.46753	9.96753	9.30978	12.5519	8.09549	10.9595	82.9018	77.0336	134.123	192.149	192.663	202.148
tmem177	99.7213	129.024	141.014	184.149	150.234	201.669	64.4309	73.5413	123.755	140.111	119.594	58.2347	63.06	59.6613	110.701	82.2701	115.638	99.3419	114.15	105.627	139.521	133.551	134.559	95.7492	96.5916	131.431	88.5316	88.6013	75.4641
aimp2	99.6722	130.992	113.742	149.371	187.741	167.059	88.8302	100.97	180.733	213.835	225.494	140.261	120.202	113.587	174.822	172.573	234.589	178.818	186.003	187.434	234.621	241.315	226.681	88.4091	96.8366	112.962	75.3183	64.3059	67.1944
si:dkey-4e7.3	99.5376	117.795	149.927	115.449	118.201	85.1164	49.3904	48.9503	109.768	129.905	107.864	79.9151	78.8857	70.7057	29.5487	21.4574	37.6529	19.9983	37.0277	25.59	39.3146	32.5516	33.8904	176.986	189.509	260.71	228.662	226.808	239.592
gpx4b	99.2745	135.281	121.01	184.617	153.244	143.087	25.1662	33.8982	61.503	52.2819	60.5374	32.584	39.3443	33.737	147.179	124.267	153.649	120.94	173.565	141.197	191.802	164.848	158.61	64.252	55.4431	75.1667	89.6747	72.266	77.8548
mmgt1	99.0639	134.506	65.1779	129.213	118.995	148.293	21.9173	31.5514	47.8697	45.9586	47.218	32.2381	40.2005	35.3759	49.906	44.7769	52.2581	31.5476	48.193	32.6967	43.8033	42.3634	37.208	67.0652	61.3283	84.9361	46.0652	53.4612	53.4185
si:ch211-51h9.6	98.6505	129.945	60.712	94.7184	67.5146	95.589	46.2104	47	93.5178	87.3625	91.7573	48.9223	73.0194	39.3495	83.7217	35.7282	71.1845	44.4498	72.5599	43.9676	101.317	84.6505	77.424	95.8673	80.0744	110.359	120.482	132.851	114.023
tradd	97.9404	158.461	114.771	163.55	164.623	141.955	21.6218	14.3094	48.8613	63.0884	65.9794	25.9373	31.63	28.1994	4.22713	3.50668	6.07708	8.21788	7.7184	5.73587	14.1372	7.77492	5.62179	98.9147	92.705	138.236	62.0483	64.4892	48.4512
chmp1a	97.8434	117.342	83.4329	200.491	161.511	164.66	20.4842	10.9774	34.7119	36.7579	46.7662	16.5777	22.4442	17.3386	18.9216	17.5709	25.9238	19.3288	18.5656	19.3718	29.4457	24.8009	15.4344	44.2677	58.4133	101.397	19.5551	23.3258	29.638
dpm2	97.8318	77.4139	96.3238	83.8478	64.984	65.6021	25.3551	20.1602	44.4212	51.3498	49.4446	29.8939	22.0234	29.6088	16.0574	11.0708	23.6769	9.74232	11.6836	14.5394	16.3525	19.4152	13.1509	46.6255	61.3004	87.2577	68.4506	64.3311	71.7931
cj104	97.8161	127.748	97.2886	83.4207	117.233	101.466	42.0833	37.5793	58.085	53.5557	75.6087	29.0051	37.5437	30.4482	89.4106	77.9329	64.1961	61.0427	84.9329	79.0559	94.1799	114.158	96.5696	100.519	110.77	160.354	97.2002	78.2835	82.3191
nr5a5	97.7312	143.01	137.267	143.653	93.1585	202.272	54.3847	47.2833	100.689	96.4754	98.2354	44.036	50.892	48.0173	0	0	0	0	1.48309	0	0	1.43494	0.584492	34.0516	30.7604	41.2358	21.8177	22.4949	25.3966
hpgd	97.7297	52.2224	75.538	178.601	198.873	202.006	29.1216	31.698	55.5771	49.2526	59.5338	35.6658	40.525	28.5308	2.51493	1.00548	1.75076	2.7599	2.01889	0.719074	4.44516	2.45887	1.92383	70.0935	73.8813	94.6021	51.6438	56.642	60.7623
psme1	97.7017	91.6374	167.055	83.3443	47.7424	94.0695	16.7079	15.697	24.4451	32.1442	35.6296	23.1202	22.7753	16.8615	38.7017	31.1588	40.7638	32.2874	29.8856	33.7918	57.116	39.3433	28.6029	61.245	61.8197	94.907	114.109	114.197	98.651
si:ch73-185c24.2	97.6318	91.3458	120.452	104.497	52.2548	131.076	39.993	38.1679	55.6973	56.3147	57.7224	43.4806	35.9177	31.5124	0	0.4	0	0	2.27425	0	1.1204	1.5311	1.06221	59.7528	64.3371	78.0301	76.6421	61.6094	65.3565
zgc:92606	97.5763	115.706	115.884	195.025	138.355	223.879	44.6568	56.274	94.7062	69.428	89.1907	47.524	46.4025	42.774	197.254	127.605	207.038	126.887	167.475	172.588	170.193	168.518	134.661	285.682	307.299	440.496	141.182	152.442	130.394
RFK	97.4479	151.871	232.755	91.8262	84.8885	152.306	42.2812	46.682	64.5307	73.0777	71.8057	45.5358	39.8098	36.6687	17.4683	11.6789	12.5378	12.0205	6.64213	12.274	13.4795	9.65644	8.55828	57.3865	64.772	82.499	102.61	113.364	94.4438
PSMB1	97.4262	119.761	144.227	123.79	155.853	143.618	38.4792	38.0928	84.9729	68.8985	72.9792	55.4867	46.2174	48.7982	92.6621	65.6534	102.696	69.1805	67.4833	81.0548	101.322	83.8852	80.0248	111.006	108.428	162.384	115.751	101.643	96.0138
agpat3	97.2892	80.5185	94.6751	201.01	79.7814	227.319	35.5403	26.7782	45.5274	39.5127	52.3945	31.9758	30.6224	29.8092	20.4377	12.6538	20.5692	15.7383	20.8712	18.6055	24.7858	27.0467	23.0918	46.6023	42.5254	74.2597	65.5801	56.2935	65.5129
NDUFS4	96.6465	101.136	84.8446	78.7032	48.5204	89.7522	62.151	62.749	72.2682	98.6408	93.8955	72.8745	83.7134	68.0369	208.294	150.174	260.71	146.779	209.108	150.703	231.061	221.157	197.382	120.558	119.883	173.032	153.647	148.822	148.738
emc7b	96.3294	123.587	94.3119	92.3774	113.862	125.985	46.6068	50.5706	63.313	84.2808	79.7836	53.7831	50.4514	40.6864	60.5243	49.9497	71.2266	46.3017	54.813	49.4164	73.8356	73.0367	57.5763	90.2395	93.796	130.571	78.352	88.7215	89.4633
bnip3lb	96.1886	84.9569	89.6801	113.133	101.284	162.952	36.8143	53.2154	62.0614	83.7126	94.2083	34.2451	37.6984	32.7239	97.4951	79.3001	103.728	67.3658	81.1483	73.565	101.43	106.499	94.8496	103.867	115.492	152.951	76.9011	69.1243	84.0198
klf15	96.1751	131.531	115.273	42.4325	15.6505	30.8083	28.5571	30.0076	30.708	37.7619	40.7052	30.6298	20.4747	12.2083	8.08097	12.4471	16.6491	10.6256	7.38408	12.5426	9.25536	11.4651	3.92803	14.809	14.2872	14.3073	21.9696	25.5066	28.1889
tmem14ca	94.9949	158.598	94.4892	128.028	80.5631	92.9573	45.6058	56.8174	91.6126	78.6544	103.527	43.8874	75.3402	63.1741	116.156	97.0611	129.347	102.555	122.219	88.5501	120.029	134.773	122.402	64.1109	58.3558	82.8837	85.3541	106.122	88.0563
FAM222A	94.2067	100.537	91.8213	30.8011	16.8185	80.0713	20.7888	16.2425	20.0117	18.4198	18.9459	11.429	11.6063	10.9351	0	0.157325	0.198391	0.099612	0.306881	0	0	0	0.358491	19.6876	14.4581	23.4958	26.0472	24.328	26.7872
rflna	94.0169	155.676	118.249	431.644	331.776	771.451	19.0667	17.4515	28.2034	22.416	28.6835	25.5738	21.5418	20.1527	7.07173	7.25485	13.67	8.32827	9.50971	5.00675	14.3283	8.573	6.67848	48.1219	47.8025	67.0755	15.7899	14.8186	18.7738
rcn2	93.6415	58.5782	81.3505	81.8655	128.947	106.961	18.9443	17.2358	29.9786	37.8976	30.4287	15.5809	28.1388	21.5386	9.9314	7.23365	7.65916	7.69614	5.13291	7.03644	10.8199	10.4137	3.86817	89.8001	81.1699	107.033	59.7063	62.075	73.418
tstd3	93.6081	93.6336	90.2188	106.562	79.6997	92.5293	13.3321	17.4224	24.2188	23.9746	37.7125	20.0038	21.5674	20.9402	13.0751	11.2074	16.4733	12.3601	8.54199	8.00127	13.1183	10.8384	10.5547	60.4669	60.4835	108.05	79.8613	75.8957	73.902
marveld2l	93.5284	73.9542	76.76	65.0389	39.2242	34.1857	21.8287	21.7323	40.0946	44.7172	38.5207	25.6237	24.8139	19.8527	0	0	0	0	1.07597	0.068294	0	0.789084	0.371366	42.2049	42.9281	47.8744	35.44	34.7396	35.1067
RPS13	93.1509	88.1455	88.7713	987.282	331.757	832.681	61.1289	57.2777	97.5645	89.4094	139.845	65.9739	71.3042	58.5159	58.497	57.7631	76.4401	64.0006	64.6493	66.615	83.3527	82.4798	76.967	83.0658	83.2516	121.608	59.9157	51.2567	56.5105
smpdl3a	92.8829	104.315	86.7012	76.1778	52.5986	86.3041	21.4683	24.658	23.647	27.598	28.7058	22.7428	28.5169	27.1084	1.60505	1.14295	1.58718	1.99877	2.18115	2.31423	3.78866	1.7098	1.94023	37.4205	37.0656	48.1876	32.9458	40.716	30.0117
bri3	92.6631	131.653	118.286	117.574	57.8297	149.633	35.03	24.1451	71.7794	79.7914	91.5863	45.2434	29.2194	29.5779	4.73861	7.09113	5.82134	6.46763	16.4916	6.33813	10.8537	8.95563	5.95803	28.6487	21.3741	29.7374	27.5695	23.705	22.3501
tlr3	92.6059	55.056	51.4947	33.0375	27.2215	33.3466	24.2273	22.8128	27.2825	35.9045	26.5355	25.1413	23.9209	23.8027	4.21295	4.14674	3.50369	5.16572	3.87265	2.24394	6.98313	5.82964	3.60637	13.1615	15.6622	19.2519	30.1946	32.4571	31.6785
zgc:153675	92.4074	110.305	89.3565	397.901	378.904	452.907	27.0672	16.4423	47.0867	46.9205	58.8038	28.7375	25.1962	21.965	36.2361	23.3134	34.9019	30.119	29.3124	33.3783	41.812	29.4927	21.2734	158.573	176.898	230.106	32.6267	30.8329	38.4896
fam234a	92.2223	110.705	114.796	119.513	73.3554	98.7191	47.9822	37.1897	63.4355	60.643	68.313	42.9936	39.6013	29.9013	10.6117	6.26817	9.16393	9.85146	12.0095	7.72838	12.6101	10.1361	9.04403	60.8507	59.0398	80.4292	47.8687	47.1687	51.0162
SCARNA10	92.0666	60.5836	60.0461	62.9488	93.343	64.9556	221.097	320.521	211.643	225.167	225.271	279.717	332.193	257.186	1.22867	0.692869	0.812287	4.28328	1.31399	0.423211	0.645051	0.607509	0.337884	0	0	0	0.518771	0	0
oafa	91.7813	79.1178	85.8245	133.156	112.118	143.835	32.6463	22.3474	56.5457	50.0095	57.6034	23.7489	27.84	26.3143	7.77637	5.92475	6.11181	4.891	9.23699	5.16878	9.31083	8.33122	4.26653	60.4117	54.1273	71.1698	21.1013	22.974	25.5598
si:dkey-184a18.5	91.7758	96.9005	102.559	162.814	161.974	213.423	39.4005	34.4125	61.6295	69.7074	80.6882	45.2662	52.7314	53.2314	48.2614	39.9916	54.1007	42.4496	36.8141	43.7974	41.1775	55.6499	50.9964	43.4796	43.4412	79.3409	32.9077	42.0288	49.7338
mss51	91.578	137.521	136.275	35.5694	26.1548	91.6794	24.2789	11.0547	40.9684	41.5209	42.0789	21.5534	25.9814	27.956	3.7586	3.31757	8.91523	2.19533	16.3133	6.87285	7.41585	3.33354	4.64189	39.1597	43.4558	56.3532	12.3864	8.18796	8.98526
tmem129	91.5317	107.338	93.5978	98.7369	78.0165	81.9302	34.0119	31.6033	40.7658	41.2296	51.0477	39.8072	28.45	30.8053	8.52984	9.45179	15.4545	12.2534	9.74839	11.6162	12.8283	10.045	13.8889	56.7778	56.2893	95.7153	89.6529	91.3095	80.8586
TXNDC9	91.4349	114.216	123.067	189.161	184.712	195.644	29.843	24.7161	53.2849	55.8935	60.6763	35.8108	40.843	44.6527	57.6387	58.4086	66.5457	48.078	52.028	53.6806	75.3075	69.5344	59.471	95.7763	90.028	124.472	56.271	46.072	59.1742
pi4k2a	91.3943	143.168	71.7757	96.7703	124.877	199.578	68.2852	53.2274	104.445	117.959	107.079	63.5366	70.0626	69.7373	9.58352	6.17897	8.27778	6.5384	7.45134	8.5921	7.16443	11.5451	9.63833	235.668	242.894	325.893	92.7335	81.7126	79.9272
LEPROT	91.25	86.7525	74.1338	76.6187	44.7197	48.3384	18.1288	27.4116	36.3712	46.1212	39.5631	24.9684	21.0354	15.6439	23.4646	12.8258	22.4268	16.4672	22.6338	13.2727	30.2563	23.5025	9.08838	35.5278	46.3801	60.452	34.7045	42.1591	29.9646
urad	91.233	125.674	124.143	87.1153	51.8005	66.8674	69.3017	65.3566	120.864	132.775	127.434	98.9259	99.6864	87.1523	0	0	0	0	4.12843	0	1.16846	7.11649	4.94444	117.606	111.423	148.974	216.418	217.135	201.703
rdh8a	91.1897	88.1901	91.2589	56.6844	22.389	43.8889	16.2533	18.066	40.4039	40.3737	39.6681	21.6983	16.6003	15.3661	4.81525	5.29017	5.85875	2.01126	4.48055	2.10798	4.7216	2.94678	2.34852	20.3547	20.6602	33.7421	32.2016	29.3588	32.2034
eeig1b	91.127	119.999	124.691	71.1358	216.342	65.0258	13.2102	12.3355	39.9836	35.168	51.8325	14.1214	15.0969	12.2089	0.523686	1.2739	0	0.167959	1.39363	0.846684	1.2851	0.200689	0.437554	8.04307	9.56934	14.8549	7.38587	6.71835	6.52972
shmt1	90.7786	217.799	315.14	111.385	51.4473	222.623	86.8224	68.5775	110.143	112.776	126.621	86.3925	71.1693	51.4101	46.7966	67.2813	43.1441	50.2855	49.599	71.0894	63.1171	95.6537	57.5376	241.585	216.438	320.627	308.337	295.59	223.313
mlx	90.6894	103.819	86.6238	170.105	120.632	153.694	43.4866	34.1191	65.9076	55.2323	59.9652	38.7865	36.6084	39.1258	53.5817	39.0482	50.51	41.0743	40.8514	44.0495	49.156	39.0448	38.3574	59.7416	58.6359	78.1446	34.4752	30.7423	45.7363
shfl	90.3311	88.7631	101.241	80.2943	70.2953	60.4838	19.714	25.1243	39.6678	39.3386	52.1767	24.5836	24.1564	20.5329	2.9922	2.22519	4.04181	4.00557	5.05407	3.13935	5.09086	4.70513	4.13991	15.8857	21.0998	19.9693	22.2926	18.7871	19.4191
ZFAND6	90.0665	91.6663	87.6898	91.5822	192.036	275.646	51.2332	42.4535	68.1228	77.9283	64.1517	40.7495	53.5673	47.0262	69.7201	65.0413	85.0282	72.7119	60.8045	54.537	83.2482	72.0234	54.8572	112.442	111.943	157.625	101.57	77.6585	82.2298
cdc42ep1a	89.9059	115.393	68.1196	76.5561	62.9725	71.2104	15.7096	19.6304	49.5974	70.0635	69.8061	35.8812	31.816	31.5437	2.67822	2.11551	6.36716	2.16584	3.95627	3.38779	8.23597	8.40016	3.62046	31.5825	31.7657	51.0751	13.1444	13.3779	13.2814
h1-0	89.7973	94.1524	83.6365	106.876	22.2529	90.5879	39.6231	51.0033	86.5176	70.8074	67.8409	67.7889	72.6968	54.8023	385.233	249.848	279.883	363.601	379.223	301.673	408.032	445.771	302.603	242.229	252.095	342.715	329.462	350.203	379.241
camsap3	89.762	74.203	71.6041	102.358	70.735	95.3776	21.7607	22.8464	45.4326	51.5395	60.5091	25.8187	19.5434	16.7695	1.11192	0.718376	1.32938	1.0649	1.32579	0.620062	2.40557	1.58953	0.980871	13.6698	13.3657	16.2993	10.4427	9.86818	12.0735
blvrb	89.6437	66.2789	72.6749	150.62	114.402	186.887	44.5735	49.9629	74.9584	72.091	79.0832	60.6404	65.1313	59.1482	13.5995	25.2562	28.6645	20.9909	33.9038	69.446	84.2978	17.9259	22.2016	42.5345	35.8205	49.3641	45.288	46.7425	54.3849
arrdc3a	89.6432	135.752	181.842	311.448	92.5399	328.709	17.0691	31.4977	54.7956	99.0949	92.9211	39.7846	35.3457	29.5229	36.5953	38.2269	41.4717	25.5745	25.5863	20.1998	34.3337	23.5307	23.2716	40.7855	41.1917	56.8039	53.9809	55.5867	49.8314
ppp1r3b	89.6189	121.743	124.438	83.1104	13.0223	37.2951	17.8482	15.6401	19.811	32.5499	20.7707	19.2505	20.2473	19.8769	0	0	0	0	0.573248	0	0	0	0	15.6699	15.6805	15.1805	41.7994	32.1093	39.1157
cltb	89.5381	63.528	46.2471	84.3305	45.694	135.178	9.66667	9.13003	13.9195	16.0445	20.8628	8.07759	11.9095	5.66164	6.50862	5.83908	5.21552	3.5	6.29167	5.24282	7.18534	5.56466	4.96839	27.9339	29.7924	26.8118	16.5072	18.9957	12.8218
grna	89.2354	65.3788	87.114	59.7446	10.0132	18.6482	14.298	10.3327	28.0412	42.921	32.6857	21.4164	25.6421	23.271	7.84814	5.42113	9.66516	9.47304	7.49647	10.4533	26.5031	10.5093	10.1533	6.35586	8.77924	6.50433	6.33873	7.56538	6.38754
prss23	89.1722	127.944	73.3256	145.445	186.449	134.879	32.4619	29.1097	58.7875	64.9126	58.2151	32.9434	25.7712	26.8843	9.2108	8.59726	11.4756	9.11397	12.3042	8.09254	9.33505	14.0317	10.0994	56.8003	60.467	68.9636	23.9811	24.5741	21.8972
hmgb3b	89.1417	53.4007	77.9341	172.28	200.879	101.281	13.7103	14.8531	29.3821	49.5972	47.8269	30.0593	25.1138	21.8759	5.33655	2.2869	5.88069	4.82965	9.92138	4.87586	13.3503	2.06414	2.80759	221.574	233.328	330.283	162.824	146.666	157.726
inpp5l	89.0713	95.3258	78.076	91.2959	137.653	168.51	6.23314	8.50195	14.8722	19.4899	24.6774	4.44664	5.92364	5.46358	6.47257	8.07149	7.74393	3.6259	4.24843	3.10162	4.97977	3.77473	4.5888	21.9784	17.9181	25.6533	14.6066	16.3181	16.0279
cant1a	89.0706	99.001	94.4445	35.7871	23.6674	44.8736	47.8464	44.5782	46.4998	47.5548	46.0696	49.3546	55.6502	48.6145	4.00861	1.53324	1.75198	3.08388	1.7432	1.75284	5.24147	3.93266	2.75232	40.2571	41.831	44.6435	58.2789	65.0291	60.1467
GINM1	89.0434	90.8585	96.4916	99.1522	64.5798	96.0892	32.352	36.4739	52.6569	55.6601	47.0196	35.5308	36.4426	32.6181	27.3221	28.6246	35.8427	29.4146	33.662	25.8562	31.6835	40.4262	27.0336	56.19	58.0187	89.9631	52.1307	61.5794	62.2073
slc26a6	89.0131	94.0096	71.1158	71.4003	28.4111	86.247	15.8419	11.8426	51.1628	46.7179	65.4328	19.7526	18.7863	14.8646	0.609768	0.35146	0.644512	0.183283	0.580564	0.523666	0.579557	0.430514	0.699396	25.1327	24.5865	32.1592	38.6944	31.9476	32.1631
thrap3b	88.7634	108.974	121.616	49.8761	21.255	27.1461	21.5421	17.3246	42.1009	45.2895	57.7984	19.6848	16.7146	18.0822	4.64423	2.55698	5.48529	3.38011	4.67399	3.21745	4.84105	4.31704	2.17619	28.022	30.0357	43.0889	38.6253	45.1721	41.9036
kdelr2b	88.7575	76.8327	113.344	258.107	221.457	196.95	24.4877	19.6706	44.1543	59.4021	65.8651	32.5422	27.0065	27.3217	11.1115	10.1556	13.0298	16.7834	10.3359	13.1641	21.4449	10.8638	11.0402	85.6667	74.677	121.483	42.4663	46.5454	37.1846
mgll	88.7523	87.172	68.2968	40.5312	56.0975	207.975	114.322	97.4245	194.254	205.493	166.602	108.862	139.103	114.521	35.2632	34.8869	45.4235	30.5346	47.0034	41.0292	39.8065	48.8606	48.2554	3.8348	9.54435	11.7052	12.8177	10.499	8.26608
tacr1b	88.6808	148.799	95.8046	19.9646	10.0231	36.6187	16.0155	12.038	36.1232	38.4474	51.259	23.793	12.9831	15.671	0	0	0.149606	0	0.275028	0	0	0.561305	0	0.415636	2.3847	3.0973	7.29134	5.85433	6.92801
ebpl	88.6028	112.799	112.958	104.282	47.596	99.6638	31.4843	32.1525	44.6072	46.1284	47.1949	47.2604	46.2728	38.3874	3.99822	1.48637	3.79739	1.80095	2.75355	3.04088	4.62204	5.33709	4.72926	65.1893	59.7206	78.9422	59.9138	63.4082	58.5927
nr0b2a	88.5528	145.545	164.408	15.7634	1.80787	21.1571	30.0537	29.7412	56.6215	51.9595	55.7927	20.8687	31.3843	27.3574	0.36056	0	0	0	0.359223	0	0	0.947368	1.14768	41.4105	47.9852	56.9811	29.1303	24.9055	22.374
ifi35	88.1893	69.3093	149.777	72.9746	39.5767	54.0985	20.8836	17.6156	24.1464	26.4833	34.8125	21.8627	30.0606	21.5863	12.5011	7.32748	10.5924	11.24	7.94499	8.68597	26.9099	9.43481	7.33589	33.9842	39.1229	53.9325	49.1367	44.2976	44.2743
itpkca	88.1418	96.0676	144.956	73.856	41.2653	110.881	20.3926	22.8962	57.753	61.6512	70.5688	35.8019	30.4777	32.1038	1.43994	2.13047	2.10979	1.29197	2.88783	3.35243	3.60621	2.28321	2.35879	49.7661	52.742	75.0558	98.4722	97.687	84.5485
si:ch211-93i7.4	88.0833	99.0846	127.494	88.7582	62.1817	115.892	52.1437	58.9267	71.9753	91.0761	111.748	67.3518	66.8174	50.7959	0	0	0.210385	0	3.31602	0	0	0.986571	1.58639	90.7278	92.538	134.961	174.538	157.513	152.212
cyp7b1	88.0177	84.8323	79.648	93.0215	96.3443	107.169	37.4207	41.3309	63.4508	103.485	89.5604	42.0753	40.7109	32.8603	2.28391	2.99657	3.53062	2.747	4.62278	2.26045	2.99771	6.21007	3.80023	53.739	56.9708	83.235	55.0584	68.1583	64.0996
dpm3	87.8648	91.9163	83.9733	168.933	201.812	168.425	27.7093	28.8059	65.69	64.4167	75.7654	32.011	44.1463	41.4627	9.08372	7.28519	10.9034	8.32659	11.3514	7.87397	12.6596	12.5189	8.24195	107.565	104.245	135.813	62.5704	75.1573	58.3238
aimp2	87.7817	80.6569	106.533	148.981	175.28	166.178	68.355	83.3947	148.18	176.192	175.611	43.5717	94.8204	81.4092	127.414	120.559	109.351	122.982	140.859	83.399	177.637	161.741	156.946	60.3148	65.3111	85.6241	56.4959	40.5026	41.5268
arf2b	87.7306	74.3299	100.403	174.482	248.582	185.639	35.968	30.3014	54.4475	72.7169	84.3071	25.1872	40.5411	29.621	35.4623	29.3687	35.234	18.3014	26.3128	29.1952	36.3676	32.7728	19.8185	123.203	130.029	184.257	46.9772	42.8196	52.1324
pcdh7b	87.5872	108.444	98.574	143.759	66.5726	124.628	31.659	26.5681	32.4121	43.3193	53.0252	26.4157	22.8375	21.4319	0.445684	0.266932	0.358566	0.377955	0.344223	0.318991	0.58911	0.775564	0.332802	10.5252	10.0834	8.63772	5.73068	7.51687	8.0421
msrb2	87.4771	67.299	14.8095	288.449	5.37143	288.04	4.7219	2.0381	43.2762	55.299	36.4657	15.1695	6.39524	6.61333	0	0	0	0	0.289524	0	0	0	0.767619	17.5419	15.6752	22.8381	14.7143	21.3695	14.5076
selenot2	87.3105	106.163	103.568	72.0007	80.121	74.8061	34.3875	30.8109	60.445	63.3171	55.9041	38.5633	49.6692	34.4842	179.911	117.217	169.856	134.045	131.602	133.359	170.302	179.46	152.759	55.3232	65.7978	86.7063	57.6891	71.8116	65.8943
GATA6	87.2734	138.925	132.754	97.4597	54.2384	111.376	32.3374	28.6461	54.3384	66.6881	76.2656	31.9505	26.7286	21.8411	0.113284	0	0.297881	0	1.32559	0.213529	0.834963	0.844743	0.570905	35.9546	37.7031	49.0473	24.0809	26.6011	24.5662
cbx5	87.1308	137.281	128.471	131.671	85.3419	113.191	15.568	18.7975	20.7755	27.752	31.0279	22.4343	20.9121	14.8215	25.9362	15.6484	26.6018	23.9549	20.6104	17.9362	28.665	20.7986	16.0578	59.0974	61.6983	84.653	29.5718	35.1441	52.7611
sc61g	86.7482	111.5	101.571	331.682	458.524	359.564	95.3577	87.6165	101.359	125.536	149.827	122.362	147.047	122.114	94.1471	78.2106	96.4706	80.5141	66.8129	67.7471	99.3412	94.4059	109.682	650.878	636.858	989.956	379.085	337.304	337.786
SLC16A10	86.7273	104.066	183.746	64.4689	22.2302	80.7529	14.6728	10.5039	20.2737	20.6589	24.7665	15.1842	10.1842	9.47276	2.38586	1.11414	2.72341	1.89235	2.23022	0.784695	2.64332	2.56745	1.63943	26.0029	29.0045	29.4468	35.8528	38.357	29.3719
vapal	86.6768	109.304	97.4333	121.865	166.835	163.434	35.1347	38.9139	42.0878	43.4807	43.8817	35.9514	30.2014	30.99	176.118	164.231	162.1	152.609	152.55	159.055	201.67	207.208	160.004	93.8021	90.4982	112.251	36.8197	53.1739	45.137
ifi35	86.6249	62.4506	120.936	61.1458	39.1366	57.5178	17.0357	18.6565	32.4298	23.9409	30.5739	22.213	20.1743	19.8665	11.0438	10.3089	10.8955	11.9531	10.2314	9.66769	31.0464	14.9021	10.2416	45.9633	42.1804	54.9465	55.3354	46.0525	48.6779
msrb1a	86.6164	58.7374	45.2763	68.5822	57.7374	39.3219	11.4658	5.63927	1.80822	11.3425	9.19178	13.4817	2.64155	2.10502	12.9612	3.04566	8.10743	2.47945	6.58904	5.50457	14.2831	8.15297	6.94064	50.1963	58.258	82.79	53.8858	63.2557	87.0091
bet1	86.5593	80.9097	67.1706	163.099	175.306	180.972	18.469	25.6706	41.3841	40.24	42.4443	20.2135	24.9161	18.5903	13.3604	13.7965	14.2746	9.93248	17.2518	11.9453	17.9891	18.7062	12.2847	73.5634	72.2108	94.5922	31.3321	28.3257	36.4234
foxa3	86.0999	108.566	80.4872	77.22	52.2387	102.454	36.3341	33.1584	60.4749	59.7605	66.3363	33.768	30.9084	33.3776	2.38814	0	0.225225	0.946697	2.46622	0.352853	4.9009	0.292793	1.17117	81.6089	76.8739	97.1787	78.9955	69.0131	70.4812
stxbp4	85.9321	77.7971	116.081	155.776	122.407	185.682	21.043	22.5392	38.396	40.5622	46.8375	16.4851	25.193	19.8059	0	0	0	0	0	0	0.242373	0	0.161017	14.7842	15.1176	17.5405	11.8885	14.0347	14.4637
RAC1	85.7247	93.1186	79.6512	108.621	114.661	127.08	34.0936	29.9038	55.5245	59.2814	66.4944	38.1937	41.799	24.497	15.4124	19.4338	16.9244	14.2216	12.7912	16.1521	21.8806	30.8256	15.8308	46.3247	45.7582	54.2019	47.4768	31.7964	37.2337
tspo	85.6455	99.7858	103.719	90.4559	71.3133	104.373	30.9611	31.8445	67.0886	61.6744	61.7114	32.1032	42.4621	43.5062	46.2526	23.072	49.8635	38.1697	35.9161	33.7848	84.8848	37.1545	32.7019	91.6953	79.0915	137.763	133.727	124.189	129.473
cdc42ep1a	85.6259	133.706	102.13	118.451	84.7332	162.481	8.58687	14.4414	20.7606	20.2136	20.2219	10.6226	12.4131	6.92269	16.6467	16.0091	19.5536	12.6143	15.6575	10.0914	19.4796	24.7456	13.7772	16.1625	17.6276	23.079	7.76226	7.07149	9.39069
cxcf1a	85.3188	85.663	102.246	84.7512	41.1763	96.1111	7.8756	5.41063	24.2138	11.5773	24.6304	12.5	21.9553	16.8502	7.17874	0.702899	5.49517	2.41425	4.17754	1.90821	12.8986	6.68599	7.51449	94.9106	81.3394	144.158	18.5821	19.1232	9.9372
paox	85.126	96.06	86.8379	91.1401	42.7952	84.2309	12.5443	15.9919	23.6543	22.0899	19.2553	18.1711	13.6361	17.4867	7.11135	4.63987	9.45003	5.03775	5.82129	4.91554	10.2295	8.2075	7.84791	30.3287	35.4981	48.2116	53.0451	56.7939	52.387
dnajc22	85.0004	93.6513	55.4943	96.1696	134.655	119.566	42.48	38.7817	52.4376	81.7164	75.1793	49.0737	62.0826	44.3778	0	0	0	0	2.18163	0	0	2.23177	1.5078	50.9383	50.5259	55.295	54.5567	54.7126	50.9343
eva1ba	84.9901	77.2285	74.1071	80.375	65.2656	122.629	12.7976	10.3889	20.3532	19.0159	25.0655	10.2163	26.9563	18.3909	16.121	17.2401	29.0992	8.97619	16.1905	13.3968	19.4266	20.4901	8.36706	95.8889	94.0912	120.612	205.271	237.696	226.01
stx7	84.9843	73.7717	67.4345	52.7417	25.393	42.7731	9.5083	16.6485	27.4797	26.4308	32.4677	18.0701	17.8718	19.7814	16.887	10.8192	14.6218	10.7749	11.2892	15.4566	21.184	20.1232	10.3284	21.9668	29.744	34.1259	37.2228	34.7611	39.5083
nipsnap3a	84.9092	163.059	162.783	42.8994	46.6562	44.7715	28.5335	30.4766	47.6468	54.087	56.4703	38.818	40.0489	46.5004	11.6094	5.31377	12.3962	9.1188	8.21384	8.41859	13.3019	10.6059	9.59364	92.2439	106.726	132.17	139.067	130.121	133.199
zbtb4	84.8537	84.9818	102.169	69.8178	170.792	178.789	26.7094	24.9079	46.5734	49.2471	47.5107	22.3055	19.812	16.1805	12.09	10.1029	18.1538	7.14761	10.7907	9.77152	9.75411	11.8125	8.63533	12.5456	14.2159	19.4231	11.4999	11.2165	14.2443
scarf1	84.8267	76.9577	108.082	59.7421	30.3003	87.4872	43.194	41.4678	99.1649	110.823	108.752	57	50.0304	43.9802	0.600529	0.256173	0.82672	0.313492	1.24559	0.253968	0.445767	1.97046	1.66534	22.7434	23.5644	32.2355	30.3245	32.6023	32.3422
tvp23b	84.5218	70.3894	54.1698	75.75	64.7033	82.2009	32.1643	28.6402	60.7734	51.9159	49.0491	32.2157	30.2609	22.6799	37.3349	29.6083	40.0498	35.9922	31.3777	44.8629	51.8084	51.4566	39.5234	71.067	73.0911	110.915	71.8497	61.6051	82.778
snx3	84.4205	122.482	101.334	79.629	69.2827	68.0636	22.5795	21.5283	40.258	50.3348	49.2138	31.7509	30.583	33.5928	35.2995	24.1714	36.0265	24.2049	34.6034	24.6025	48.4532	31.1254	26.2279	70.0468	80.1246	124.17	79.8701	93.0813	106.268
si:dkey-239i20.4	84.4086	78.1519	124.152	188.125	133.948	194.535	23.454	22.5303	46.3027	48.6612	46.2491	36.6647	34.1088	23.3818	0.647846	0	0.348079	0.377765	0.448196	0.208382	2.60186	0.252619	0.561118	13.9901	10.9505	17.5151	22.7678	24.5175	25.0573
ifngr2a	84.1166	89.9603	94.0412	84.5465	99.7265	184.365	35.5458	31.1825	49.2006	49.1875	43.8127	31.006	31.8698	25.4354	16.1639	10.4022	14.8673	13.3142	15.3278	12.4168	22.8592	15.2971	11.6868	56.9253	59.3389	93.2843	62.7682	66.279	55.6752
shc2	83.9741	80.467	70.1162	79.0119	31.2255	84.0994	23.8274	18.9002	35.014	27.9503	36.6961	16.0021	16.7311	13.1106	0	0.529412	1.19258	0.390056	1.06758	0.82423	0.60084	1.22059	1.15686	6.58333	8.07283	9.67997	36.2784	37.4076	32.409
fzd9b	83.691	90.9459	86.5316	73.6624	18.2574	49.7988	16.6692	15.1158	30.4555	40.5683	35.9116	28.111	19.9516	17.8227	1.81391	1.32626	2.4979	1.204	1.12575	1.27212	0.244558	3.06885	0.336924	12.1366	9.82347	17.777	15.2266	18.0074	18.0265
cebpd	83.3456	122.151	153.046	339.083	408.902	537.658	93.3465	51.7442	101.586	88.2297	76.1187	26.972	23.1969	21.3871	254.515	128.761	216.452	157.939	174.502	183.51	66.2934	83.7162	36.5154	155.541	156.627	219.489	76.1313	86.2654	77.9131
egln3	83.3193	101.408	125.573	58.9464	46.2823	71.1146	14.0055	12.7847	7.13956	6.14972	6.69686	2.76155	2.81146	2.69963	6.74446	6.49261	12.4455	2.43993	2.05638	0.962107	1.48429	1.51941	1.08688	11.8068	13.5323	16.61	11.8401	9.09427	18.3859
rhoua	83.2766	68.7614	74.8023	95.1023	73.3879	92.4008	33.5561	29.0121	55.3356	54.1345	60.8356	34.2394	25.1083	29.6174	2.99697	3.93409	3.24015	2.32273	5.46136	3.92652	4.70833	4.2947	2.71818	38.7038	35.1367	44.8174	26.5742	37.7133	38.6917
herpud1	82.9667	90.2707	98.9366	131.922	111.241	107.219	18.5187	18.0919	29.0504	35.6752	38.3496	19.9634	20.1232	11.6016	4.77439	8.23252	12.1467	4.35081	8.06707	3.81382	9.87724	5.85935	6.44797	124.028	124.446	148.641	30.2959	33.2207	29.2821
rilp	82.017	79.8947	77.1802	251.084	278.064	486.99	22.9133	21.5528	34.5905	44.8394	42.914	30.7391	23.8001	22.8326	5.9917	5.19532	9.02564	4.95626	8.32353	6.12142	13.4713	7.44042	10.4095	62.0287	64.8348	87.6124	47.3043	46.437	41.0946
SLC16A6	81.5889	99.2082	132.876	140.221	236.595	169.446	45.6801	52.37	68.5759	61.9969	59.9596	48.6658	48.1436	38.1822	6.96576	6.47368	10.6418	3.95197	8.08636	6.744	7.11957	8.93664	8.41696	52.9154	54.5187	78.3217	66.4399	68.2946	64.872
minpp1b	81.4797	100.359	85.627	70.0685	42.8939	64.6182	30.7975	22.6018	42.3357	41.5659	45.7769	32.0227	27.2844	20.4456	9.07986	12.8326	12.2952	12.8192	13.2563	12.1309	9.65688	14.4207	8.55693	30.1437	27.7146	42.8022	21.3331	28.6146	21.281
tmem64	81.4235	59.4657	80.2293	48.6376	36.6684	86.5493	17.5404	11.6779	31.961	32.3678	33.992	16.9624	20.9089	17.9059	1.17258	1.05164	2.88263	1.02911	2.28732	1.68451	5.23662	1.7061	2.82817	16.7726	10.0319	15.8807	27.9474	14.8131	18.6744
polr2l	81.3227	107.633	50.9025	89.6755	74.6968	102.44	19.5479	20.4823	54.0656	45.2996	52.7872	24.4716	34.4291	22.4486	49.4929	28.8014	52.0106	30.8723	28.0018	26.3759	37.234	39.5461	43.961	56.9982	68.4468	83.7571	51.5089	60.0762	58.7961
gnb1b	80.8155	86.5505	93.9722	78.8134	63.0886	81.8526	20.9914	17.9327	27.0599	36.0741	30.5264	19.6754	16.4701	17.7656	16.1823	11.2784	17.4759	10.4475	12.3635	8.96948	13.3989	19.2457	8.26788	31.3602	34.0766	42.2797	25.847	24.0426	29.9047
elob	80.7697	127.453	120.713	88.9913	92.5875	105.57	18.672	17.0194	27.2426	37.6305	37.6812	22.3398	25.194	18.8843	83.3004	65.4836	69.3619	62.7712	67.2114	65.1013	81.588	83.4007	72.1044	68.5962	68.4248	101.547	80.2032	67.7916	84.2103
hmgb2b	80.7679	124.244	101.278	86.0643	46.057	67.2004	72.6595	64.8869	126.146	112.355	142.229	87.4837	92.5463	85.21	93.0777	65.6705	103.893	82.0607	88.4609	89.1585	118.434	119.541	98.7702	80.2647	81.3709	113.549	109.259	117.608	117.721
ndufa1	80.5624	98.9212	97.2812	120.872	102.491	112.182	40.5412	47.8906	52.9224	51.1659	50.1459	42.0518	63.7294	45.6835	275.995	195.921	304.66	235.412	224.54	217.974	262.782	368.939	292.681	221.028	228.105	325.906	345.047	323.456	303.868
p3h3	80.5251	78.2422	69.7325	58.5146	38.3858	105.111	25.2852	23.8924	41.719	45.5772	47.2633	19.7339	29.4729	22.807	16.2428	18.1126	19.6279	14.1589	17.9452	13.7016	16.3327	24.4777	17.1197	23.8109	24.7764	33.2443	32.5705	30.548	29.0286
rab43	80.5164	81.9582	80.7055	132.616	177.236	222.925	11.3781	10.3678	16.6767	25.689	21.8719	18.061	14.3048	14.0315	0.993836	1.62397	3.11918	1.52329	1.76575	0.910959	3.68014	2.38014	1.8137	67.0993	56.3377	80.8247	25.6582	28.3671	18.7123
parp12a	80.515	49.9096	54.8942	55.1289	24.4809	33.2833	10.6276	11.0424	19.1302	25.4545	21.2433	11.9942	16.8327	11.3203	13.2792	11.0166	12.9553	18.031	12.1998	13.7534	25.5029	13.0819	13.7603	23.1564	23.1913	27.2982	21.6949	24.2254	25.9268
psb9	80.0867	71.4291	78.6691	17.2694	9.27514	21.2737	6.85199	9.56299	11.0759	12.907	16.6646	5.81689	7.66098	10.9668	15.1101	6.12903	7.27514	15.3735	9.07638	9.82258	40.222	3.11195	8.98434	4.68146	9.21441	9.26373	3.35199	4.01233	4.54364
COQ9	80.0553	77.8121	94.5657	56.59	58.6712	50.2551	36.5658	44.8902	45.4368	41.6008	52.0607	42.3273	37.0365	41.2312	133.893	103.923	149.206	104.507	147.046	106.771	128.93	146.966	146.468	89.6991	67.211	120.856	121.921	97.3941	92.9686
DAPL1	80.0182	265.924	117.581	129.619	182.693	155.461	67.4552	69.9412	78.1583	68.6989	95.9944	59.1597	83.4258	92.042	89.4454	70.4118	118.723	74.591	71.6597	71.6008	112.854	84.0014	94.5364	142.37	121.56	153.654	91.2885	118.577	91.6947
hint2	80.0054	92.8256	109.215	82.748	56.1275	94.6369	14.4284	17.3748	20.5442	18.2125	24.1874	16.6687	20.8246	17.9391	31.2778	25.0937	35.3782	30.3762	29.0639	29.4123	34.9896	39.7152	23.6754	74.4552	83.8534	104.816	73.6386	73.418	88.0639
eif4ebp2	79.893	70.875	86.9566	83.4282	56.3454	103.399	29.9172	29.9814	43.9392	37.1478	54.4645	29.9071	36.6216	23.4274	119.678	87.0625	126.874	81.3117	107.948	91.1807	142.378	138.432	93.7432	80.3573	87.4519	98.2669	68.6225	74.5372	65.3598
mgat2	79.8881	94.7427	98.5884	79.6331	53.3876	77.6225	31.6482	28.7181	53.2064	56.1096	55.745	35.7908	35.1365	27.3842	15.7908	16.1337	19.0878	15.4776	21.4978	15.943	20.5218	19.2114	14.9223	42.7411	36.311	52.9625	47.3227	40.4077	44.4581
MRPL51	79.2582	104.534	88.4975	72.9786	78.1518	68.4868	34.0416	36.9074	40.272	53.3615	48.1877	49.7128	39.7582	41.6096	77.8098	62.9225	86.3665	68.864	70.3532	63.415	89.5227	89.6272	87.6284	54.6965	57.4572	76.0271	76.9295	79.6039	68.1921
bbip1	79.0813	141.017	68.35	115.478	112.271	203.438	34.7833	31.4119	47.6071	36.831	59.4595	30.8713	40.3929	32.1833	70.8476	56.3405	54.0333	49.1833	56.1286	43.1262	59.1405	57.9	61.6643	79.7452	104.6	133.386	68.4619	72.7905	61.7619
tuba8l2	79.0317	192.918	172.79	117.613	268.402	193.387	15.1069	18.9787	43.145	53.1633	57.0931	27.6998	26.8986	25.3946	305.525	248.207	252.114	214.79	229.329	232.758	258.057	254.512	243.365	42.5429	44.6201	55.4705	27.0059	26.1737	25.8302
txndc17	78.9259	89.9949	83.6745	79.7323	69.0864	82.6453	35.9214	31.2048	33.0802	47.0786	43.0191	47.266	40.6925	35.4776	13.4837	10.7419	16.0561	13.2357	17.468	13.826	22.349	18.963	15.8238	93.798	99.0617	134.741	124.356	118.479	103.506
noxo1a	78.8645	88.8917	24.5007	47.0766	149.963	50.9518	8.00459	4.43799	14.0855	14.1693	16.6043	6.58629	2.9544	4.45013	3.12139	0.078412	0.267717	1.98327	1.36319	0.842192	4.69423	0	1.01837	29.8799	26.0246	28.7625	5.6601	2.45374	2.71686
aplnrb	78.8578	129.822	112.007	45.3121	28.1468	43.3693	14.0286	24.8615	60.6584	53.7932	55.6777	25.9631	24.5032	23.1339	7.012	5.48292	11.3869	6.55863	13.9363	18.0729	20.301	10.9972	11.1034	24.0849	36.3481	47.5402	22.7932	24.7147	30.5873
igfbp1	78.6537	75.7299	115.234	725.124	938.571	861.433	182.013	64.9381	281.346	264.837	253.006	81.9728	89.0429	81.7789	0	0	1.13878	0	2.28163	0	0	2.87755	2.15238	163.328	144.438	212.552	134.595	136.886	123.934
sh3bgrl3	78.5275	55.674	73.2308	76.4139	24.8169	58.1612	8.65934	8.40659	22.4396	14.022	10.4908	7.7326	8.02198	7.75092	13.0147	9.98901	12.2088	6.59707	8.00366	17.1831	15.707	10.3516	6.32601	29.1575	17.7143	38.9011	29.381	17.2198	16.7656
RAC1	78.5219	89.1323	73.1383	104.815	108.476	113.216	22.0627	26.1117	50.3471	53.4223	62.4704	34.2848	13.4287	23.5125	14.6546	7.28608	16.3162	13.1357	12.5576	15.7208	20.9888	8.61598	2.84364	42.7835	44.2032	50.8995	10.6847	28.5284	11.9759
kcnk5a	78.293	54.0629	67.5305	70.7642	50.6426	86.8692	18.4854	16.8403	26.9043	27.8678	34.1887	17.27	17.2076	16.1766	0	0.121128	0.222839	0	0.191401	0.265834	0	0.137772	0	3.55386	5.56218	4.43431	6.68054	9.4785	7.13408
hsd17b12b	78.2824	65.9824	81.2613	112.999	55.529	170.678	32.3077	31.607	68.0828	18.2506	39.6857	30.2257	55.1026	16.0525	4.80773	6.51734	9.0109	3.69722	6.37289	4.84217	7.23872	11.2463	4.80525	221.41	267.918	352.642	319.382	375.054	338.062
adipor1a	78.0337	83.5023	74.0327	81.2839	77.6981	88.0027	26.3066	24.7448	54.6807	52.7047	56.1717	28.2385	21.9345	22.4482	21.7401	22.5217	33.9088	20.8898	23.8477	23.6446	38.8737	20.65	26.1242	42.7862	39.4208	50.2418	37.0261	31.5077	24.5715
cnbpa	77.9077	92.0376	99.5727	80.2763	76.9193	92.0386	50.8074	55.7345	62.8017	65.9763	77.7121	52.3079	52.6843	52.9195	294.766	286.58	325.862	313.192	302.865	294.586	382.994	464.018	346.843	129.762	133.719	168.629	194.166	184.2	175.683
bhlhe40	77.8678	82.2589	80.0748	27.4307	29.2409	33.0028	15.882	14.5701	16.1964	21.6671	15.2363	15.7003	10.0782	12.6116	56.612	32.5766	44.752	43.9274	40.4186	39.7387	60.3892	63.6706	54.4181	5.24822	4.06176	5.71892	61.829	62.6477	56.5546
vatg1	77.732	92.6621	91.6808	75.3527	63.9635	81.6847	21.4739	27.6906	34.4916	42.1892	40.7153	31.1793	26.8433	31.6906	92.4374	64.4887	94.4906	78.8	82.2926	75.603	112.553	95.8286	102.403	79.3626	92.9507	134.649	148.248	150.136	142.314
pgap2	77.6562	109.213	136.243	79.5072	58.5608	84.3656	26.1194	35.3529	44.7547	51.1072	61.4601	34.5	29.3438	28.8255	26.4752	21.9281	26.1307	21.0183	25.9451	21.0536	32.7078	21.3843	24.7425	39.9163	44.9634	52.1059	50.0216	37.5085	38.3935
zgc:101016	77.6254	72.6316	78.3273	83.6121	133.387	102.551	18.1581	16.9903	30.1581	30.2772	32.1212	25.7549	28.0334	25.5703	8.37326	12.3259	16.3844	11.929	7.78412	9.73398	6.93315	13.4485	10.1546	18.1045	22.7841	41.3064	13.6086	20.8767	28.6003
CTBS	77.3332	70.7981	93.6025	68.4919	33.0548	56.6306	19.06	20.756	32.4052	27.6879	33.5463	20.3209	17.691	18.2809	11.2367	8.65098	8.31847	7.88202	8.72472	11.6313	12.8655	10.9923	10.4838	44.9593	44.3754	70.6777	79.6155	73.2065	71.0562
m1ip1	77.3239	56.7478	134.948	31.0436	14.9121	30.108	6.16969	7.22669	7.50503	7.54125	10.8337	7.888	4.1395	7.52918	415.261	186.666	323.557	210.827	240.8	188.895	353.062	404.009	284.22	275.657	302.404	446.506	1158.94	1084.84	1082.06
chchd6b	77.3138	87.8223	92.4766	75.6925	81.847	112.021	42.3021	46.3203	59.4779	65.4375	77.8945	43.7201	59.1725	42.1081	161.963	139.792	215.262	139.863	233.462	171.243	215.815	205.124	180.384	95.2383	88.4082	125.013	170.64	146.477	136.059
TOMM7	77.0711	112.372	95.8083	46.8298	45.4264	73.2876	48.6909	38.0083	94.1058	83.0132	94.9802	59.9256	50.0893	44.0421	66.5042	45.9041	63.4248	35.4446	58.2248	50.8446	85.9554	60.7868	47.9355	72.6901	84.6248	90.1008	136.532	128.377	126.441
ndufaf8	77.0657	183.223	102.941	185.864	139.969	132.319	34.2066	31.1768	28.9249	43.5728	54	39.8239	33.6972	33.3991	39.8404	39.2653	42.8005	31.2582	35.5587	35.6573	47.5634	41.3732	31.472	72.1244	74.0587	78.007	70.1573	65.3756	58.5634
dazap2	77.0482	102.374	96.1026	60.9592	62.6749	98.5698	33.225	36.2917	53.4104	62.9308	76.7367	35.492	39.3931	31.9431	39.0173	38.4635	46.3263	35.7244	43.4363	36.4512	40.7095	51.2855	34.2349	58.733	62.9617	64.0494	59.2658	38.6304	54.2058
cd53	76.461	71.6372	107.578	70.0944	11.3407	40.2074	14.756	13.4497	14.7096	22.1558	25.7105	16.6311	23.3076	18.7855	16.4219	6.62224	11.1911	9.90203	10.5574	11.8897	25.6236	13.9828	10.9329	9.88173	11.2886	13.6858	11.2259	8.65313	8.19153
eif6	76.3798	77.6687	94.8634	130.729	129.498	106.492	22.4549	27.709	69.207	57.7432	68.6742	30.485	41.0888	32.0758	34.541	32.2889	37.9235	27.2104	24.9016	32.1284	43.9898	38.0164	31.4037	81.7172	72.0109	108.07	54.5382	41.0471	45.3538
tmem86b	76.0727	86.9987	51.7447	247.734	120.669	372.244	60.1473	82.9447	110.565	124.308	96.5367	106.741	91.056	56.5087	0	0.112667	0	0	0.563333	0	0.36	2.89333	1.73733	138.828	126.765	177.147	174.387	185.169	166.9
hacd3	76.0268	125.688	95.6065	506.172	739.853	691.669	27.3228	21.2888	36.9012	45.6528	44.7394	20.2405	27.9852	23.481	5.1582	4.04724	7.74803	6.71546	5.35075	7.31603	10.3966	6.466	5.48318	261.915	255.573	368.979	70.552	64.0749	72.056
saa	75.921	6496.22	15.5346	65.2006	2.41112	4.35016	9.02865	6.3118	0	0	0	8.55626	4.32603	0	0.445313	0	7.62796	0.49566	0.616909	0	0.849823	1.82775	0.569445	40.8033	24.4172	38.209	7.73213	6.50702	5.27428
SH3TC1	75.8629	121.913	117.914	135.512	111.473	146.309	13.8953	14.0772	44.1533	44.6983	47.8212	13.9216	14.4025	13.6412	0.213235	0.127206	0	0.121569	0.735294	0.073529	0.073529	0.162255	0.147059	29.9379	31.4816	45.1874	24.0806	26.7234	26.8629
slc25a48	75.7561	23.6795	41.0477	122.191	159.325	132.119	25.1433	28.0807	23.9573	28.0148	26.956	11.6619	12.9995	11.178	1.00791	1.36498	0.631329	1.56804	0.898734	0.91192	0.760549	0.809072	1.19779	32.6681	34.6624	49.8068	103.81	94.6993	90.0743
elovl6	75.6019	129.523	185.969	38.9091	28.0957	44.0127	7.76703	12.0435	10.9659	11.5892	8.88433	9.93154	9.73345	6.46918	2.97307	2.03082	2.12914	4.19857	2.9244	2.1645	5.30986	3.28164	2.08079	107.623	108.7	149.024	419.882	462.826	462.635
tomm6	75.5796	66.3383	76.8905	57.1841	54.2139	69.0647	27.7164	23.5224	22.4378	23.99	34.3731	25.0912	28.7612	25.6617	31.3483	36.6318	45.3955	35.398	24.3582	34.3632	40.2886	52.1493	37.7512	100.796	86.1119	134.428	166.604	169.336	174.96
tbx2a	75.3415	96.5596	92.5477	55.9944	16.2355	44.2752	23.3781	18.9694	23.6505	24.5627	26.2867	28.1918	17.3217	14.0997	3.40508	4.09571	4.39674	2.34154	5.33836	2.49007	3.54726	5.35067	4.24543	8.44162	10.5234	12.116	22.7699	25.55	21.8245
fam210aa	75.3114	79.1292	85.5825	57.6609	45.5744	60.0738	15.2007	13.7359	27.857	29.2249	28.3864	15.9988	17.8973	16.4095	34.2641	27.7762	39.3702	25.075	30.955	28.5663	32.7566	32.9343	27.391	31.9296	34.8708	53.06	54.8062	52.6413	43.4983
tnfrsf1a	75.3064	80.4068	101.833	93.1257	61.2055	78.2801	23.2976	22.9775	32.001	39.3547	36.8272	25.456	25.3391	18.4321	11.0105	14.8535	19.1387	12.8107	14.6461	14.3906	19.854	19.9636	15.1995	52.854	48.3614	59.0686	32.4706	32.425	33.3265
tmem50a	75.2609	108.572	86.3333	101.411	114.815	183.718	58.6294	47.1346	116.47	100.018	114.653	55.6014	65.5476	52.9224	121.599	70.9679	130.824	88.6491	92.1066	90.1025	102.744	123.369	99.1522	96.8986	72.6903	118.239	81.4658	73.323	76.7785
anapc13	75.0711	91.8711	76.9511	78.5511	86.8578	82.8267	14.96	14.1467	21.3022	25.4178	19.3422	15.3911	21.92	23.2489	15.6889	14.2844	10.7022	7.84444	9.85333	13.56	21.6844	6.77778	10.7867	20.8	28.32	54.24	49.32	35.4533	31.6267
PDLIM4	74.9343	60.1009	72.9142	79.2064	94.7268	107.979	10.9921	9.67444	23.1683	24.9494	26.7864	19.1479	16.8593	14.2082	1.6066	2.05671	3.97057	1.66116	1.84781	1.6748	3.31658	2.44867	2.20459	32.9009	32.8313	41.519	26.9034	12.0513	17.2943
emc7b	74.5984	72.7534	75.9208	97.6981	107.279	99.4843	28.2036	27.1393	55.4221	56.4531	48.2801	43.9187	32.7268	33.9973	41.6373	34.431	55.3743	37.179	42.041	42.3422	57.681	45.1885	43.2609	84.7561	85.3005	102.403	52.2261	56.1701	73.4891
sf3b5	74.5336	124.175	113.544	99.7668	86.659	114.797	61.6678	60.0353	109.254	103.085	97.3569	62.8498	82.3746	83.7014	149.625	118.896	150.557	124.293	132.643	135.3	181.237	182.942	158.476	82.6272	81.576	109.44	137.972	120.931	98.4558
erh	74.3972	96.2738	65.3243	175.007	200.176	219.621	39.2822	33.5561	70.372	41.2766	56.5878	43.4607	52.5355	33.529	77.0607	55.1327	81.7393	65.3458	62.4374	81.1187	77.371	87.9757	80.0673	225.523	234.15	328.61	113.852	108.851	105.717
ZFP36L2	74.2772	113.326	146.537	41.8851	14.6055	31.6919	23.5501	24.5921	22.7517	25.3853	27.476	31.6665	24.1481	22.3489	95.5584	52.579	81.375	48.2931	67.9537	58.3014	67.6681	63.1644	42.2202	8.88515	10.956	11.0174	49.3426	51.2317	50.7121
igfbp5	74.2224	91.5667	94.8261	47.5034	28.7917	50.7701	16.2538	18.8345	28.997	21.9519	34.5193	24.2644	18.1621	15.7424	13.6936	14.2595	20.1648	12.325	9.64204	12.3106	10.3102	13.5258	9.12083	11.3795	9.18674	13.5947	23.4076	26.7795	21.7549
ttc7a	73.8152	83.0871	72.2958	63.6651	40.4988	55.9982	11.7741	11.4762	48.2782	44.9225	59.045	13.4848	14.5728	12.8746	0.134735	0.125	0	0	0.503115	0.393302	0.089174	0.341121	0.336838	8.86896	11.9811	14.5935	13.2609	11.0672	10.8306
vapa	73.6814	87.1101	75.4793	82.1439	72.6447	86.9506	30.4363	25.1451	41.8599	43.4211	36.0899	30.5705	30.5181	26.3013	69.9232	64.7072	85.3515	49.8793	59.4831	53.4376	98.3481	97.003	69.2587	65.4502	77.4789	114.79	66.1072	58.2835	49.9717
cd81a	73.6281	73.1259	72.6814	57.8322	54.0286	89.0986	24.3805	28.3472	37.0862	39.8571	43.0022	24.3263	28.429	26.9677	106.846	126.852	151.931	120.002	123.69	127.029	120.131	169.135	120.188	25.5244	30.382	41.4354	24.4359	26.6442	28.9108
atp5f1d	73.5701	83.314	114.799	83.1496	71.5984	108.462	76.6651	92.657	116.886	112.932	129.68	95.558	84.3908	67.9946	110.946	91.8868	135.454	100.292	144.854	129.462	133.439	111.189	128.698	104.997	123.966	204.911	168.509	150.818	150.376
vaspb	73.517	89.3724	106.641	94.3265	71.9409	100.43	17.8459	17.4502	24.9599	25.4425	29.4717	22.5554	18.8275	18.3189	12.5192	7.08333	11.4759	12.9535	10.7926	7.34025	24.5729	10.6489	7.86046	55.833	60.173	87.3459	37.6335	38.1594	43.8424
ptpn2b	73.385	85.9162	80.2281	107.275	78.2203	106.273	42.0429	37.1326	41.5789	42.8363	43.1131	37.9396	40.0643	26.1657	24.4016	24.3587	28.5029	20.7739	19.9639	26.9103	20.9435	17.9454	21.8791	33.7875	36.6823	41.5341	33.384	16.7212	16.423
zfp36l1a	73.3125	114.152	114.967	122.439	60.8674	135.303	30.0945	29.4512	48.7896	66.2454	87.4123	39.8735	32.8643	34.1341	22.6502	25.1319	34.5595	18.7576	25.811	25.5648	36.612	31.8605	19.1623	99.923	85.2088	110.479	59.9505	64.4909	65.202
si:dkey-28b4.8	73.1268	66.1836	50.9355	85.2436	74.3641	97.0172	22.1857	22.3898	33.5532	47.8646	47.4393	21.0661	19.3087	17.2606	3.12868	4.03178	4.40858	3.17689	2.85441	3.05103	4.03381	4.50971	4.09612	20.2502	21.2176	29.892	19.1335	22.6653	20.5864
ssh2b	73.0978	67.1973	65.4175	214.606	144.356	136.813	11.9102	10.391	36.2163	48.3228	53.4435	10.3173	17.5302	15.1772	1.37823	1.98216	2.34969	1.29408	2.26063	1.27594	2.4499	1.81118	1.50372	73.9859	72.5517	98.3724	13.9881	13.5134	12.8971
ildr1b	72.7712	80.3345	73.7592	65.3745	52.799	69.843	28.9722	19.6394	47.8137	47.6888	65.8595	22.2235	26.7325	20.743	1.33333	0	0.253265	0.664395	1.67178	0.926746	4.72374	1.42987	1.00965	26.9259	33.6593	40.7663	20.8257	25.0429	20.1584
MRPS7	72.4898	60.5352	55.6833	48.9473	28.8631	60.6827	15.526	21.3577	29.3636	28.6802	31.4742	19.1986	20.4742	20.8215	47.7228	48.8339	59.5565	47.6229	43.7648	51.9416	60.983	63.5437	52.2622	35.6212	34.9089	47.9091	47.4335	48.3677	56.7445
psmb4	72.3366	71.9415	117.457	80.188	91.6077	80.7563	32.0508	41.647	46.5863	55.7415	65.3623	40.0437	34.2186	32.1251	71.777	53.5093	72.5497	54.7317	61.7115	60.6273	87.2607	73.0699	62.476	86.1803	81.8541	116.489	97.4033	97.0607	101.894
hmox2b	72.1729	73.0012	64.8799	52.7025	26.6915	42.7649	24.4734	26.8751	43.4854	46.8132	43.8883	26.7199	27.9502	25.5213	20.1247	15.094	27.6044	14.7439	20.3685	20.3119	19.4716	21.063	15.1745	40.0317	43.0722	56.5791	55.3915	54.6399	56.471
tapbpl	71.9142	49.4074	105.424	24.0304	17.1745	29.9202	8.82549	8.72543	11.0232	15.8023	14.1423	7.17213	11.0828	7.88029	3.13401	5.71076	5.44895	3.42287	5.62498	1.68434	6.19357	3.4735	8.27901	10.1286	11.6921	12.3306	17.6575	13.5217	11.0381
orai1b	71.6477	39.1616	61.6259	75.3333	36.6638	43.0204	23.802	27.2591	48.2635	48.6608	41.1892	32.1892	22.7787	15.5924	2.22125	1.75546	1.41485	2.77438	1.70888	1.94178	1.36681	1.49054	3.48181	9.20524	8.4949	15.4119	11.8457	13.8836	10.5721
myzap	71.4623	82.3591	82.4617	54.2392	25.9011	57.3196	7.73008	7.62924	13.4718	12.4025	16.2191	8.75424	6.81716	4.86398	1.31144	0.817797	0.924153	1.11271	1.27076	0.869915	2.67119	0.594492	0.463983	19.225	14.1608	27.5689	18.2028	14.9174	11.1311
sntb1	71.4369	123.997	84.6555	119.923	190.441	153.123	17.9517	2.11276	31.7185	32.9598	13.5502	20.5901	11.1282	23.7578	1.59943	0.728006	1.40959	1.45956	0	1.96277	0	0	0	169.223	194.803	244.884	16.6793	31.0111	46.1241
ufm1	71.2766	61.5034	41.1993	92.4244	111.021	205.875	22.7234	23.4605	50.9353	41.866	61.4519	34.9983	56.7257	37.61	46.8488	44.9605	56.3746	51.4502	65.3694	50.2594	63.8522	61.1271	46	111.43	162.863	187.028	71.9674	65.7062	89.5344
fa2h	70.8827	34.7475	73.3781	33.7446	28.9154	17.3754	5.42977	4.86521	8.01151	9.59952	13.0311	2.92289	6.39898	4.37448	3.98356	3.07681	3.14615	3.02271	3.04094	3.12612	7.59967	4.88539	3.71369	2.60371	2.33592	2.86432	2.30753	1.2361	1.84788
h2ax1	70.6021	85.3876	46.6744	95.3256	52.7106	131.793	18.2661	23.8424	35.1835	15.9374	40.8295	16.3204	31.9612	21.0749	249.899	127.052	322.437	174.253	181.809	237.344	238.199	206.884	204.705	87.3307	85.2016	124.072	40.5297	41.7545	39.3101
bl1s3	70.5362	82.5899	103.186	87.7649	92.3926	95.8074	25.4102	34.3117	62.4088	62.9536	52.2185	42.8734	58.6025	40.212	31.6324	24.5877	32.8783	25.0933	26.3795	24.53	26.8649	27.8556	27.5669	63.3853	64.0479	90.7203	108.195	88.0955	94.7733
antkmt	70.3836	86.9129	91.7673	68.28	53.485	68.6261	7.51802	8.33483	16.3649	19.3544	20.7973	5.35586	9.21021	6.55255	4.24625	2.13063	10.958	5.0976	4.27628	5.89339	5.8048	6.28378	2.93694	38.5413	16.2673	23.6644	17.5653	20.3709	16.7673
hnrnpdl	70.3374	89.6331	73.1156	93.317	100.188	129.051	46.365	44.3992	73.6376	63.8737	81.3207	32.5704	43.1881	34.2471	270.153	209.788	276.661	195.013	208.021	209.222	252.86	271.932	242.441	116.232	120.451	170.544	112.447	97.7963	85.3881
ccndbp1	70.1344	69.7846	68.689	80.4228	67.5712	97.1928	18.0768	16.9928	40.0324	38.3844	47.2651	17.5102	18.8603	17.3573	32.0335	26.5079	37.8705	32.9142	27.0124	34.279	41.8901	43.224	28.3882	37.3486	38.8377	51.3983	37.1416	35.7504	30.2376
atp5md	69.8814	106.339	79.791	83.0283	83.3729	69.2768	94.4972	120.407	151.723	144.121	162.89	135.418	129.63	104.74	273.876	177.819	298.427	215.763	261.895	214.051	278.254	326.571	314.74	169.534	188.565	289.653	348.627	294.438	290.54
NMI	69.5093	80.15	122.22	54.9255	61.8775	55.7608	10.3755	10.8186	20.0456	24.7755	23.2892	10.8941	16.8951	13.0912	3.39118	6.00931	5.13529	7.38039	5.3902	5.46471	21.7206	5.81029	5.46078	23.9402	25.9853	38.2525	20.8902	21.9652	22.5363
arpc3	69.4104	67.3817	81.3387	34.8692	22.3315	31.4713	16.233	25.1326	34.086	31.9892	35.0797	32.6452	19.8871	18.319	26.4014	19.7276	23.0672	32.0394	23.5484	21.7966	95.4606	32	25.3271	22.4982	17.5305	36.4507	47.2375	46.0815	29.5161
ppm1kb	69.2906	75.041	77.131	48.1304	32.6696	52.6693	21.0421	16.5392	51.5354	51.8542	61.7149	19.8099	21.7107	16.3404	6.68626	8.48392	7.66345	5.04064	9.7231	6.48392	10.4244	5.75906	6.24152	29.5906	23.2547	34.357	18.4757	23.5357	24.6917
calm1b	69.2387	87.6896	92.7487	75.8143	41.5866	57.4771	26.157	23.0741	26.4958	31.008	32.7836	35.0262	33.2439	28.9131	108.642	60.1773	94.8459	101.685	73.9202	70.9112	160.353	106.13	90.8805	50.2638	48.7652	62.9496	83.9428	80.1269	73.7884
mlx	69.1392	71.6961	63.1699	171.218	217.241	119.618	21.5307	23.5379	33.983	30.5405	26.583	19.983	17.9621	15.6902	24.0791	20.2065	26.7699	17.849	23.4301	17.0719	25.7464	23.4621	14.9111	80.2797	99.6856	123.224	61.651	36.8922	50.8588
cnpy2	69.0511	58.9731	61.4095	136.563	159.724	119.424	9.63262	15.2455	28.4489	31.7841	31.5323	20.3047	21.6676	25.7796	7.85663	10.1595	9.35125	9.03584	10.4444	10.7043	18.7294	9.67563	8.39785	92.9301	96.0269	151.832	102.925	116.199	114.958
f2rl1.2	69.0172	80.4617	97.41	32.6365	49.9233	43.3092	23.7123	20.0732	37.1292	34.3618	40.0379	30.1705	34.1197	29.6262	1.41516	0.294574	1.17054	1.14901	0.621878	0	3.70715	0.786391	1.42119	17.4961	22.4496	28.3178	35.0999	30.6701	28.1309
yipf5	68.9389	106.33	82.8322	77.0842	59.0727	79.7624	29.9654	27.1384	62.1626	58.8754	63.6915	40.4083	32.4302	39.0415	9.62976	7.62399	17.8616	11.128	8.78316	10.1176	15.9227	12.2307	10.0185	81.0329	66.0975	89.5732	37.158	39.6021	32.4429
GINM1	68.9298	78.1249	90.7001	75.3716	79.208	98.9272	17.0672	16.5214	25.4508	23.9809	40.0271	16.3015	19.8855	16.1191	28.284	21.4534	33.4934	22.5504	26.8202	29.1256	27.9866	30.9771	22.3233	52.8553	44.2855	56.7288	32.4718	33.6718	36.4519
derl2	68.9279	73.3345	81.6094	247.398	280.915	260.976	19.5863	13.2731	33.6815	43.6308	46.1779	16.8723	21.4804	17.6326	20.4542	12.887	14.2042	13.5102	11.649	13.7473	21.8078	14.3977	14.5196	202.478	200.402	258.039	34.7233	43.5614	50.9246
CREG1	68.8467	106.274	92.2595	139.302	58.2954	157.309	58.1759	53.1085	81.8902	79.8923	70.6713	55.7858	54.7603	51.1349	78.1128	88.814	100.179	79.5295	103.179	113.884	128.338	86.1843	68.4487	169.833	194.71	244.908	118.656	116.441	109.863
YBX2	68.5938	79.9938	80.5226	64.5344	24.3575	57.5245	20.118	20.5922	32.1804	44.8417	38.8081	20.05	27.9452	20.253	7.28817	5.51962	8.34355	7.18172	7.31909	4.39624	14.5554	9.5328	8.29301	179.139	168.789	213.958	103.741	90.3277	84.5562
slc5a6b	68.2438	56.7077	60.3321	54.9962	26.6981	66.0262	30.8109	25.4154	54.4842	56.6978	54.9847	36.622	41.9672	37.0308	3.73285	3.61492	6.58331	5.48467	5.8435	4.19823	10.3095	11.2512	9.01992	28.2444	25.0164	36.7126	40.4924	48.3871	43.181
iah1	68.1824	116.263	145.702	68.3278	60.5217	63.679	21.5587	20.8478	38.256	43.8124	42.8894	21.5029	15.6585	21.0074	8.57583	8.13569	9.38369	9.43672	12.8324	7.0057	13.4093	11.1363	9.07184	46.0849	48.7406	80.4162	97.39	115.25	98.1745
hmgcs1	68.1147	83.0738	94.2537	47.682	38.3149	30.3656	14.9711	21.0962	149.173	274.107	239.705	111.97	107.368	102.617	9.13438	7.71033	6.81735	3.93296	10.7691	7.79213	12.1433	10.27	7.24231	9.12116	11.302	7.57995	11.8542	10.949	15.1581
armt1	68.0442	69.8035	71.8675	77.1979	74.105	81.17	22.1582	20.2638	45.9249	46.4915	41.9404	19.2796	22.7557	18.816	11.0368	11.6851	16.8285	9.25975	10.1464	8.91906	14.0368	17.986	11.4489	19.3959	19.2244	22.8712	16.5276	21.2873	20.1641
smndc1	68.0128	79.1758	68.3757	65.3735	77.0629	64.4678	21.0702	18.9254	28.3436	34.7156	35.8392	27.1703	29.2836	25.761	86.7906	65.924	83.2091	65.723	59.3099	60.273	90.1137	95.742	64.8352	85.6097	91.2855	126.919	92.9507	99.3896	102.589
ogal	67.991	66.3715	91.0531	102.115	70.4485	78.8233	18.7475	18.3996	33.9425	42.9609	40.9466	22.2961	22.857	19.0832	2.16613	2.51768	2.49076	1.41121	2.77421	1.4082	2.00703	1.28566	2.26798	58.6954	52.5416	86.3282	67.9763	60.5718	57.2511
RAB11A	67.8437	65.8693	61.7819	65.5943	68.5385	86.6265	15.9427	10.3729	34.9612	35.639	39.1313	9.06285	16.4236	12.3932	4.26671	6.15394	7.00835	2.62291	8.65274	6.21599	9.19988	9.15453	4.32339	12.9499	12.6241	19.7118	7.80251	4.30489	14.4147
DBN1	67.5237	89.169	78.8829	60.4742	98.4177	100.193	35.7873	38.1558	56.3781	67.1057	77.6185	38.0642	41.669	35.6534	9.35989	10.7539	13.0936	7.74135	12.064	11.7798	9.92698	14.0612	9.31982	54.1942	49.3549	68.0064	41.6083	36.9812	44.1325
srsf1a	67.4784	69.2602	82.4734	96.1878	67.7056	78.8503	16.3883	14.6497	31.8477	34.4569	38.8541	18.5203	20.3934	15.7703	22.5825	19.3173	23.4746	24.703	21.1371	16.6218	31.5178	23.014	20.481	32.8071	42.8338	55.0381	26.3858	36.6548	27.2513
tmem18	67.3834	62.5479	57.159	93.5468	61.9259	77.1209	23.9662	24.4248	34.0131	29.244	32.4096	28.4325	21.8475	18.8159	7.09368	14.4444	21.6656	18.9434	20.305	11.8529	13.9434	11.0109	15.2026	78.2505	83.0871	98.2614	53.72	57.5534	75.2048
rab20	67.3206	41.6736	45.7985	62.06	71.403	83.3244	13.7012	13.0173	25.3823	28.069	23.528	17.4044	20.3154	20.5528	5.55142	3.92892	5.13803	6.70393	4.98206	5.40028	6.23879	4.26639	7.02346	92.6266	84.8033	119.116	29.0331	24.3313	25.3361
ammecr1	67.2179	74.8236	73.8564	55.9574	45.9923	55.3703	7.13949	9.0359	18.0513	23.6113	33.562	13.7179	8.09026	11.4544	9.80821	9.82769	14.0195	4.21026	8.26769	7.74462	10.6969	7.76718	7.64615	26.6462	23.9692	20.2226	25.7986	29.0077	21.0169
CREG1	67.1877	60.9891	45.021	38.3645	138.152	54.7652	13.5227	32.6002	35.2106	29.1599	27.7997	26.362	23.585	25.3914	37.3695	45.3754	45.0109	18.883	43.2946	55.8401	52.3906	30.803	24.6582	70.5918	67.4045	84.3308	58.7862	65.0463	66.0227
atf4b	67.1294	76.0073	72.1254	184.263	215.646	240.874	22.5704	37.6327	52.1998	60.2751	75.5413	60.0235	55.3867	48.8091	38.7977	35.2783	46.8066	29.504	41.2095	34.1173	51.9984	41.5631	37.7937	144.38	151.983	228.551	54.0963	43.7201	44.6497
ccng2	67.0784	35.1903	47.6711	51.7594	21.7584	44.9083	10.6893	12.2594	14.8126	12.1519	17.858	10.9892	12.8826	10.8284	67.9467	36.6307	39.8767	63.9093	61.2855	50.9053	97.3974	74.8649	61.9847	26.9536	33.1114	39.3323	53.0749	56.9601	55.9162
ADM2	66.9765	77.9045	39.3536	168.26	328.817	260.73	13.7754	11.3296	27.4447	34.5453	34.3899	12.057	10.7899	9.64134	0	1.22123	1.77989	1.01788	1.11061	0	2.19218	0.859218	0	46.8693	40.8927	57.7788	1.45587	1.86481	0.597765
cygb	66.7903	40.8876	52.573	58.6067	59.5599	50.2978	22.0375	8.53371	30.9438	39.721	30.7172	48.9476	18.6723	20.3652	0	0	0.930712	0	0	0	0.533708	0	0.310861	109.281	120.507	163.522	270.006	255.664	239.472
aakb1	66.7269	89.113	86.0683	58.5413	25.6308	64.5298	10.8375	25.1524	27.8885	34.6769	35.9933	33.4784	27.687	26.7409	24.8755	19.6327	26.7519	21.1904	24.7514	23.9894	36.1361	28.363	21.3231	35.1274	44.6611	45.6192	69.388	56.3312	61.7837
wwtr1	66.6131	94.0897	63.6444	97.2895	111.028	139.396	21.1031	22.2261	37.7001	47.2448	55.71	28.9656	26.5223	22.1007	30.2517	31.5425	30.0854	19.7995	23.104	21.0792	43.3952	28.3729	18.1357	62.171	58.6293	72.5916	38.8329	37.9305	31.2343
tfpia	66.5698	74.402	73.1612	156.346	176.056	130.411	50.7353	52.8906	77.9161	87.683	81.4813	50.9487	62.2417	59.3302	13.8933	14.8622	16.3481	12.3235	14.6949	10.8328	13.6171	23.4755	15.2401	82.4099	86.6299	86.1842	41.4327	36.2799	32.1221
mtdha	66.0804	61.8525	53.8087	62.3506	73.5756	73.5809	25.5721	22.7274	40.4535	49.8001	52.5691	27.3802	26.088	20.338	25.2204	20.6253	26.28	17.5526	21.647	21.5703	25.424	24.8796	15.8665	47.5697	50.0199	53.8207	37.3567	46.7965	35.8524
yipf4	66.0044	66.1572	55.8225	82.7712	76.9456	93.305	23.2475	12.2675	24.7425	26.1003	24.2862	17.7613	12.4756	13.2778	18.3866	17.2069	19.9241	14.5069	12.2972	17.2791	23.3637	17.3847	14.4769	55.7597	44.2012	76.01	36.3028	47.77	44.5719
tefa	65.8822	58.3039	66.1619	86.1635	70.5762	127.616	23.3386	19.5468	33.6698	39.3701	45.0179	29.5605	26.0799	23.4774	26.8276	25.1514	33.4059	19.449	23.7697	21.7592	44.4742	25.9685	20.9916	44.8759	44.6172	56.2366	24.3838	28.7455	24.0683
psenen	65.8333	117.804	67.6667	110.771	85.2353	101.013	37.8497	31.2288	61.4085	61.0893	54.9346	43.1405	48.9739	38.1536	82.4814	64.1961	88.8231	60.9788	52.6307	75.7918	84.2484	113.036	73.7625	102.999	82.5556	97.1144	85.0801	90.3639	78.4607
CDC42SE1	65.7634	32.1022	20.4247	15.9516	12.0645	18.2419	12.7957	10.2742	37.6989	35.7688	34.1559	15.0323	11.8333	14.2312	8.72581	4.39247	16.3925	6.22043	5.41936	11.4462	11.8441	9.50538	5.78495	19.5699	16.0054	14.6989	3.97312	9.48387	6.04839
uggt1	65.7261	63.1224	73.7012	128.068	113.373	92.518	9.20689	9.53205	15.6254	25.5095	25.8987	15.5079	11.2214	9.80267	6.12682	5.47457	7.72286	4.72543	4.94113	4.32115	7.87756	6.02671	4.2859	21.0408	23.3024	32.2646	11.8402	12.7316	11.3317
mrps21	65.6395	50.8023	89.8889	81.3695	99.2377	89.3256	33.792	24.9897	36.2881	48.4587	56.7959	31.0452	29.3773	32.3695	80.8295	52.332	83.8437	55.7623	65.9806	64.0439	76.7326	84.6447	73.5349	66.9961	62.0814	79.6563	77.9225	79.5026	78.4483
gtf2h5	65.5928	77.0047	93.2054	60.9568	65.2229	75.3454	19.5834	21.5461	39.3524	44.9615	36.5916	30.6849	40.0012	29.2007	67.1074	43.2929	58.3431	53.8331	49.1459	49.6184	52.9312	59.4574	54.2906	37.9137	49.951	58.2054	56.3676	63.091	65.3932
vapal	65.5816	93.9686	102.694	224.201	329.126	205.787	27.9957	30.2132	43.422	45.1041	64.6012	34.157	27.1374	21.0785	87.225	74.6819	90.2506	74.3791	79.2317	80.7465	93.0827	101.047	97.3875	121.378	116.679	120.255	33.7142	30.4528	30.7276
nfkbiab	65.5533	14.735	34.2762	13.2703	110.188	210.328	10.0851	0.91328	15.2961	10.2017	14.3801	11.9635	23.722	18.7681	2.82949	0.76263	0.462426	1.19282	0.985996	1.9115	0.935696	1.33636	1.33851	1.72916	2.4375	3.54596	0.223395	0.989978	1.19677
lrp10	65.5481	75.5332	64.5888	105.175	97.6807	115.751	19.7883	19.9467	34.3736	39.5909	41.8357	21.4956	20.2711	15.7856	8.17116	8.75568	10.417	7.21657	8.39991	9.10379	11.0142	9.66035	6.85016	21.452	24.4528	27.5065	19.7157	12.4634	16.3308
SUGT1	65.5066	101.51	108.073	357.821	510.321	578.77	27.5873	25.8642	30.7751	35.8593	41.7959	26.3386	37.2257	20.3364	132.527	120.486	140.169	101.467	113.44	120.395	118.632	127.993	119.901	208.739	236.589	328.332	41.8836	46.0873	41.9365
adob	65.4427	137.831	109.119	88.9747	118.671	108.899	34.6573	28.38	35.8013	36.7987	34.3773	14.7373	16.724	15.8613	32.8613	23.8467	32.5627	11.1573	12.0947	12.3307	18.608	11.1947	17.4413	47.8973	40.992	53.8133	11.9013	16.652	16.5413
tlr5	65.3561	52.9436	9.07591	57.5195	49.2258	22.5572	14.4114	3.00517	72.8275	94.3545	102.137	21.5203	93.3513	71.0847	0	0	0	0	1.13315	0	0	0.813593	0	54.7878	65.7432	79.2987	7.04889	8.30366	7.53617
niban1a	65.2313	79.2548	68.606	35.1214	18.3143	47.9101	11.4669	12.9061	19.51	24.137	24.9791	27.4337	16.6027	14.9351	6.91807	5.8633	9.97285	5.29588	7.88514	7.59582	8.37672	7.89654	7.34941	8.09473	9.87859	13.7923	21.2978	16.9934	18.8056
arhgdia	65.1607	51.4862	56.8551	61.6114	36.5585	62.2816	17.3998	17.5056	31.8678	41.8064	41.1458	25.8734	31.2628	26.9768	41.0601	27.758	43.5905	33.1234	43.7644	33.2548	67.7901	41.5008	31.5369	29.6186	26.7845	39.02	29.4816	14.8197	25.1202
saa	65.1489	5812.43	14.8692	58.2851	2.15646	4.82122	8.57306	6.56447	0	0	0	8.76923	3.26413	0	0.710382	0	6.68074	0.57377	0.480533	0	0.837888	1.58439	0.56375	13.9404	25.1006	37.8558	7.49326	6.13324	5.43255
gabarapa	64.8128	51.4002	65.1942	64.192	65.336	76.4547	16.151	17.2082	19.3749	23.1467	32.8479	23.8166	21.2244	14.2228	45.3026	43.6947	57.5933	30.6408	25.9504	31.8069	41.5156	49.1904	35.3549	66.6143	61.8296	97.7109	59.8323	52.0388	60.5442
fam151b	64.7059	92.9417	77.7219	68.1734	63.2508	81.4711	21.1176	20.7802	32.4412	41.082	27.84	30.2116	26.5083	23.0867	9.29205	4.22704	7.96182	5.24974	5.97059	4.33849	8.07792	4.57379	6.40557	40.8731	41.4866	52.0005	64.8364	64.3478	60.4948
pnp5a	64.6637	63.402	148.652	389.746	237.079	418.887	37.8343	30.948	11.1333	15.4843	15.7392	4.62745	4.53922	4.3402	2.20882	2.41667	2.67451	3.34314	1.90196	1.3049	1.18039	5.55098	1.7	616.169	637.607	860.188	739.786	647.006	654.011
ppp1r14ab	64.6463	66.3065	45.2678	96.7439	112.508	131.1	11.5617	9.69682	16.7256	19.8363	23.4958	10.6033	9.68849	8.73278	0.932248	0.113172	0.857684	0.11355	0.501136	0.539743	0.594625	0.52271	0.982967	121.882	121.559	162.185	21.4854	19.1364	22.1311
cyb5b	64.4602	111.622	73.3317	104.878	99.7694	89.8323	10.414	15.7527	31.5323	36.3548	42.9457	22.028	23.6538	20.8161	18.4016	13.3645	18.0634	14.5758	13.5737	10.7946	23.9624	16.2452	13.2656	41.8737	32.2145	53.4785	12.7473	20.5892	12.7559
lrrn1	64.3245	57.5261	83.0217	28.4475	29.0148	43.257	7.17106	6.86362	14.9177	7.29357	11.3111	6.10541	12.6648	9.99445	0.690707	0.352751	0.112344	0.095238	0.7092	0.834489	0.429034	0.301896	0.624133	49.1706	46.8604	65.9233	48.3685	49.7198	51.27
dapk2b	64.2207	59.9407	63.274	22.4887	22.4142	65.9824	6.15784	8.88529	16.1069	15.226	18.5784	6.50588	10.2137	10.2157	1.08726	0	1.76177	0.658824	1.68382	1.22549	1.80833	1.39902	2.19706	13.0029	10.849	10.2172	10.5191	14.2304	9.05
p22-phox	64.1781	77.2575	59.2628	67.2011	35.8201	52.6384	13.0635	11.5767	22.9912	43.8377	29.97	14.8342	16.5168	18.6155	22.6226	14.0018	14.2381	10.5996	15.1393	11.8642	42.9153	11.8651	11.4092	21.4868	24.9559	27.5141	15.7725	10.4568	12.6861
bri3	64.0654	78.6859	62.5948	56.214	43.4248	93.0059	22.6257	20.3923	33.3902	33.3569	31.6489	25.606	21.9738	20.8417	14.5996	22.1069	24.6498	15.0223	11.8652	12.0159	18.1317	21.4661	13.2432	39.9495	47.693	54.5167	55.5586	57.6802	52.3435
ndufb11	64.058	84.454	82.2308	75.6063	46.7241	55.3482	27.0125	25.5374	48.4483	51.3396	49.42	27.546	34.034	28.6494	58.3161	54.2476	70.8908	50.727	76.7605	57.2644	82.056	74.3846	72.0623	54.8645	49.8353	81.9258	70.9856	63.7069	73.0364
ugt5f1	64.0302	128.647	78.763	39.1906	23.8623	45.3641	52.3957	36.0693	82.0805	66.532	77.1228	49.5209	46.4151	47.6782	0	0	0.242086	0	2.48339	0	0.139044	1.75388	1.3113	62.5225	60.8901	81.6732	42.648	44.7596	52.2484
nbr1a	63.8965	71.2016	56.5374	64.7185	44.7109	60.4818	17.9452	14.1118	61.09	40.158	49.8622	18.2482	22.0222	15.5929	21.8483	18.9165	28.2383	22.5543	29.8058	24.1961	47.3485	25.7069	22.5473	29.3238	30.6828	43.2189	19.9355	22.9251	23.7454
si:ch73-91k6.2	63.8394	53.1165	61.4996	229.826	276.753	171.963	25.0659	30.8482	82.0056	105.597	100.197	32.0723	37.894	32.8129	3.85783	3.4739	4.16225	4.03374	7.5759	3.89638	11.1518	8.20803	2.30442	135.475	148.365	204.004	46.6	51.4707	50.8675
zgc:162171	63.7994	23.4199	45.8162	11.1992	2.41226	11.2075	2.72284	0.930362	2.88719	2.50278	4.17827	1.8078	4.10446	1.86769	0	0	0	0	0	0	0.416435	0	0.383008	10.8844	15.0627	21.1045	38.61	39.8134	44.4283
banf1	63.7421	81.3067	86.9466	64.1201	62.8648	61.5119	19.9901	14.7414	29.3397	39.8905	33.8127	16.6972	21.9809	21.2032	46.4103	26.8773	50.403	38.0449	33.467	37.9017	47.6326	49.4169	40.7668	48.0007	43.2098	57.7018	46.9459	56.7513	63.4152
sec61g	63.6476	50.9012	68.8077	102.119	84.5679	97.5212	17.8506	14.831	22.3012	24.3893	33.1756	19.8869	20.197	16.3946	7.04167	8.73571	8.4131	7.95119	9.41071	8.0869	14.9512	11.3845	7.88869	47.0873	43.9262	56.7054	33.0631	35.981	35.5101
BHLHE40	63.6373	73.5665	86.2547	55.4224	43.5316	74.3546	15.523	14.4962	14.561	18.4831	23.0728	13.5883	15.8832	12.4669	70.8383	39.366	73.8703	40.1371	43.2074	40.2567	49.4279	62.4251	38.2114	17.8961	19.1004	20.4428	21.4138	21.5708	19.2878
ubl3b	63.5064	11.4616	10.5751	5.38464	13.9192	10.6059	1.29145	0.833183	11.6108	22.9732	29.16	0.249484	0	0	0.356016	0.605253	0.678892	0.184258	0.407256	0.320605	0	0	0	0	0.199183	0.752076	0	0.14572	0.582747
ywhaqb	63.4949	81.9031	109.06	63.142	53.5069	65.345	14.1316	18.3116	29.8958	33.9381	38.0376	23.5003	29.1247	25.2027	28.994	17.0799	28.1054	25.0597	24.1458	20.7929	61.9508	28.0363	21.0811	26.8163	30.8927	45.4798	43.733	45.0208	52.5537
fkbp1b	63.4495	71.289	57.218	119.215	118.014	195.533	27.945	20.8502	45.0306	57.6361	53.4312	34.7492	31.0306	21.844	207.45	223.138	268.052	234.271	235.966	225.544	325.325	388.937	285.073	98.396	120.862	141.269	47.0275	47.4281	45.2416
klf9	63.4375	35.3653	41.5194	208.462	285.851	456.047	29.0819	22.6181	56.1917	53.2375	64.3125	10.8875	11.8903	11.8486	64.9764	62.1875	66.4583	28.5278	19.2472	28.1181	2.45	13.5056	4.87361	131.544	124.79	162.807	31.4403	33.8556	25.8458
ARL4A	63.3234	47.4527	64.1161	89.4295	59.6003	79.0663	26.6534	25.8574	39.3035	46.8806	46.5091	33.8143	26.9088	34.4362	12.2637	9.32338	18.2388	7.68823	7.80431	7.46434	10.6202	15.2604	9.72305	43.2056	42.2852	44.0141	21.0763	33.4063	32.0431
ppdpfa	63.2461	136.999	164.744	61.6589	25.1797	58.8249	12.099	14.0924	13.7051	17.0169	19.6667	10.6732	30.4036	19.5	900.846	712.927	908.874	664.075	1458.74	1107.44	960.736	889.382	1098.71	16.2969	14.9095	34.4427	83.8906	85.4661	100.852
mdkb	62.7335	164.293	138.231	9.59496	24.0944	71.3148	35.5939	34.1878	36.149	51.5635	83.3095	53.8374	34.7566	33.5058	3.07765	0.597062	2.5383	2.70619	1.81322	1.19517	6.21091	2.76076	1.61595	5.52571	6.76495	13.4816	28.9748	29.6611	28.0902
garem	62.7056	75.4808	70.3618	39.6245	22.9195	49.0097	14.6434	15.4479	24.8227	24.842	27.3759	13.7054	11.9361	11.6736	1.56446	0.727836	2.82269	1.01858	3.22648	1.64189	2.79017	3.15912	2.27449	20.842	13.288	22.0362	20.2772	24.9021	16.8626
tmem176	62.6318	122.519	268.656	68	59.5175	94.7373	32.1444	24.8508	51.9159	51.3603	44.9635	36.2865	38.6175	33.9937	11.5349	9.68254	19.9302	15.8127	15.3492	8.24762	10.4706	14.6349	9.70476	24.4841	36.6857	39.4198	31.5111	22.3825	22.5302
mylipb	62.5404	94.9701	71.6757	81.2444	34.5525	71.8427	12.8809	11.9831	20.5875	26.0712	20.8321	10.0318	6.74282	7.17587	1.21438	1.51075	2.47226	0.371221	1.7096	0.76036	0.500473	0.946066	1.41879	15.8975	15.4924	19.2862	23.7002	25.353	22.0525
syap1	62.5209	47.1983	70.0062	80.7411	59.7603	71.2287	16.7492	19.2928	22.0807	31.2111	27.7217	28.7388	21.9122	24.5886	50.9706	47.4576	59.1544	45.976	35.4884	41.3622	52.4859	61.4745	49.4872	111.506	84.6411	122.294	65.1699	83.28	54.7179
tmm85	62.4999	59.937	61.451	78.5287	89.2596	85.7449	25.2808	19.4336	48.9678	55.3192	64.9661	29.9116	29.8596	26.3931	59.0123	50.7605	56.475	52.8373	44.7637	50.6616	54.1685	95.2802	49.3188	75.6507	92.2377	113.885	63.9459	57.9342	59.0356
ARL6IP5	62.1441	58.3194	50.6076	46.5191	46.8316	57.8281	31.1285	19.9549	37.4531	37.6667	32.5451	21.3611	21.6319	22.4375	14.6927	17.3785	28.8264	15.5417	20.7031	17.0503	22.8229	20.0538	19.0417	51.9549	51.1615	77.401	34.6823	41.5312	35.2205
surf2	62.117	84.8101	72.2912	103.084	77.4805	101.782	7.21132	6.52704	9.01132	10.8956	16.2075	8.5761	6.41132	6.61132	7.62641	4.73208	8.12075	6.40377	3.2717	4.31447	9.14465	6.86918	5.51069	68.2956	76.6616	76.457	30.9409	31.7987	30.8503
rras2	62.0968	44.6064	43.4046	53.228	40.5844	123.038	25.7128	33.6778	55.1103	52.1342	58.0227	47.233	54.9211	49.2094	6.55963	6.05596	7.87615	8.65069	11.3028	14.5142	11.0245	11.3982	8.71216	20.6821	20.5105	25.4523	33.2811	31.7002	31.0862
atpaf1	61.9736	62.2375	77.9885	66.9191	41.4926	58.5804	19.6257	22.9291	50.8155	46.9642	44.7473	26.6905	33.6534	29.2726	56.4098	46.9632	72.2956	52.823	62.327	58.4931	69.7605	72.5645	56.4162	79.8338	82.8338	104.737	78.4885	70.9828	75.5953
arfgap3	61.9124	25.3434	27.1086	59.9899	124.586	121.533	17.7623	18.1587	41.0195	25.5366	25.0901	18.033	12.0316	1.79983	0.543783	0.587344	0	1.41492	3.33659	2.32011	2.13716	2.59306	2.11417	4.25631	6.08435	139.807	19.2789	39.5206	20.7243
npdc1a	61.8568	57.1584	65.6264	32.8938	31.4755	58.8922	7.00109	7.37126	9.0558	17.4178	16.9545	11.1677	8.36064	6.48449	2.07349	2.53783	4.45128	2.18236	1.41426	1.50735	3.40555	3.54627	2.16766	18.1546	13.0392	18.8386	18.7665	15.4333	14.172
srsf5a	61.8332	76.1774	66.3525	83.9873	41.1765	59.0516	11.2429	12.341	27.2332	31.7932	41.7465	15.59	15.2756	10.106	31.0484	29.7007	39.1355	28.3158	27.4668	27.9862	45.8479	34.3562	31.0058	8.10415	8.97419	11.6733	33.4945	33.9594	35.0083
dusp22a	61.7808	66.6396	66.4832	35.8829	22.2586	46.3359	20.8829	22.9453	33.14	38.8921	29.0145	19.1381	23.4989	20.2016	8.76741	8.08263	10.759	8.0241	11.4759	7.9166	11.6733	10.8129	11.3539	16.4017	18.9656	23.1262	26.9181	26.0815	27.4686
ppm1kb	61.6431	61.0241	49.8581	42.4119	25.055	39.6908	12.8508	17.0788	44.9822	40.5916	37.3941	11.1164	14.3955	13.9216	5.16209	4.81973	8.16209	3.00202	3.53597	4.77243	6.4007	7.60631	4.24454	16.7239	15.7991	23.207	16.728	16.1463	14.9876
cyp2u1	61.5492	52.0111	57.4332	65.8986	37.2915	55.5164	13.5748	11.5813	16.4113	21.0417	16.5404	15.0232	12.4861	12.4691	3.29004	3.95609	3.12399	1.69233	2.50773	1.97032	3.11565	4.45671	2.80612	18.4224	21.6153	26.9242	23.3803	16.5102	17.466
rbp7b	61.4564	109.714	71.6037	212.517	6.3079	4.5087	0.855442	0.664325	3.07306	3.51859	60.7714	1.16531	0.835374	1.78005	0.359688	0.307616	0.457442	0.581467	2.83569	0.522973	0.447749	1.06935	0.265801	487.263	496.708	675.967	0.622562	0.704159	2.60724
sdhdb	61.3249	59.9686	88.4277	50.0273	72.8134	53.0755	23.6059	21.4109	30.1602	28.8134	52.0713	26.7338	23.3899	24.0566	62.239	57.2746	71.2579	53.8176	48.2788	40.5157	76.4927	55.9078	57.2662	38.2621	37.9245	59.0713	54.413	103.237	72.2138
tex261	61.1333	62.3683	52.8967	58.7033	54.0317	59.59	11.4933	15.9267	24.3733	15.0133	15.605	11.9683	8.76167	8.21667	18.7333	21.7358	24.88	18.435	13.0117	17.9967	19.9492	21.0883	23.2142	24.1967	15.17	31.3167	26.3208	25.9383	29.3917
trappc6bl	61.1259	38.6215	49.7837	27.1011	20.9894	32.945	16.1755	13.9965	25.8103	17.6684	19.0576	18.9752	13.8387	15.4122	18.1941	10.7296	19.2349	13.125	17.1578	16.0957	22.5142	19.1064	13.5904	39.2074	43.1392	50.8316	44.4043	46.0319	45.617
crebzf	61.1181	76.874	67.3372	53.2054	88.2477	95.0783	12.6965	11.6042	25.7967	30.7631	30.7795	14.8432	13.4832	13.5669	13.4925	10.3207	14.3357	8.03007	11.8425	6.26628	15.7423	20.6024	9.06442	16.8039	15.2054	26.7695	10.4803	15.7173	15.111
ccnd1	61.0159	101.094	62.248	23.7383	15.7122	47.3857	35.0933	42.4334	44.6314	43.9465	39.3447	42.3686	42.4505	33.4152	6.06371	2.45506	3.87941	2.78157	4.03072	2.93174	7.65188	3.20705	4.29807	19.6075	21.9795	27.8203	22.8237	23.6246	19.7327
ip6k2b	60.8665	66.6299	70.9538	190.291	157.89	233.026	16.7128	11.013	27.9012	33.7475	31.868	14.5094	12.8896	13.6999	23.6371	23.4004	28.8312	19.6017	18.5505	21.373	28.4307	20.4286	14.2193	41.3983	38.1349	48.4177	39.2922	40.4185	45.5891
bhlhe40	60.8037	66.4962	82.5359	37.0125	41.8363	61.0134	17.4444	16.7235	20.9219	22.3371	39.4227	19.4962	13.6057	8.58396	36.1821	35.4616	43.4925	38.2352	37.7765	45.6124	24.2615	31.5815	20.1132	13.4119	17.1028	23.6374	50.8208	41.619	43.1094
PSMA1	60.77	68.7567	56.7914	126.504	137.206	98.9457	10.6943	16.3729	27.371	38.201	36.5795	16.7667	17.2238	14.7552	30.951	16.2981	44.9214	23.5952	24.5124	24.1029	21.0924	29.29	23.3267	64.4043	64.3076	107.24	44.451	48.0105	43.9152
mppe1	60.7241	45.7284	54.4801	26.2791	15.9754	26.8003	7.28827	8.53504	19.7437	17.8753	17.175	11.3736	9.25838	8.84002	3.23541	1.32019	3.55278	1.01924	2.72182	1.83617	1.55738	4.23969	2.36668	5.61517	4.00387	4.62232	8.92536	10.4306	13.0231
rpb10	60.6865	76.7649	70.0231	78.2369	67.045	66.8238	20.808	21.4143	30.9623	35.2685	29.4423	28.921	26.5723	24.0863	35.9514	39.6197	43.6841	40.4435	31.0194	37.1337	49.7837	46.825	50.7546	14.8493	25.6002	30.9769	40.6087	34.9332	37.1252
yipf5	60.6133	79.5403	64.4131	102.045	109.022	123.725	32.1877	27.5441	38.1801	54.0139	62.7897	28.9584	32.7934	25.5202	13.6499	12.6927	19.4414	15.2217	15.0781	14.7128	15.4458	17.3229	13.8149	108.481	93.1555	129.512	50.16	37.8753	41.3142
zgc:110843	60.5212	84.9758	200.339	193.688	128.095	106.118	15.2879	21.9394	28.3879	26.1818	28.197	29.9576	12.6152	14.5364	502.273	445.723	574.397	352.339	462.594	415.655	516.47	560.106	502.197	63.3485	74.3606	81.1606	40.7939	33.0697	33.997
eif4bb	60.3575	68.8747	73.5159	90.6152	89.7469	104.041	57.2421	55.1769	102.198	94.8385	95.7822	45.6042	53.5167	44.9639	170.948	162.88	175.608	168.351	163.694	181.397	216.639	243.657	200.786	79.8595	80.9947	114.656	58.8949	48.4928	47.5448
slc39a1	60.2838	54.4165	47.4287	128.534	189.155	136.734	30.8505	19.8869	57.5857	78.3228	88.9302	24.8331	24.3259	22.2769	8.70865	6.55311	9.478	6.70182	7.07435	8.89454	6.53718	12.0493	6.81184	187.221	155.79	204.983	61.0914	57.091	59.6324
ndufa11	60.2799	79.0719	94.2695	72.8815	84.5878	86.7916	25.7984	30.7071	39.234	41.5207	44.6618	28.4358	32.1055	35.8474	42.0942	33.5262	45.4294	32.3492	56.5353	31.9222	59.0385	46.4143	41.6499	62.2374	58.3299	89.6013	87.2996	78.2745	81.6421
gadd45ga	60.2787	46.4795	36.3686	452.797	317.832	458.838	21.1882	16.3038	76.9472	58.8917	67.2629	17.9802	19.1063	19.9624	18.6143	13.5627	20.5852	21.0462	23.4174	23.9273	14.0436	14.9762	14.2946	224.962	206.944	302.768	91.9392	86.4346	112.637
mpdu1b	60.0589	78.7927	74.1681	62.3883	61.3961	76.8259	16.7179	17.217	18.82	26.1626	24.4195	23.545	19.4266	17.5326	6.50596	3.53142	6.10138	5.97661	4.77294	5.40986	8.25688	7.92431	4.76835	32.4053	50.9544	53.386	42.8342	42.2429	41.2466
tmem187	60.024	66.212	49.8427	60.88	30.968	62.1667	36.1867	27.5387	53.656	56.1627	39.0627	34.8493	25.268	25.308	11.864	6.65867	9.508	6.952	6.636	10.896	12.8253	8.67467	8.156	37.38	35.3573	52.7413	39.7747	50.5387	43.104
ddit3	59.9614	30.7025	41.1291	272.819	159.539	346.456	15.6435	17.1132	58.0298	56.3202	52.2233	22.1894	35.7794	28.3853	16.5032	13.9007	17.5151	11.0498	14.0132	12.0159	13.6784	21.2711	10.062	285.671	291.435	382.707	99.0402	106.483	95.8153
slc7a3b	59.9335	16.5837	40.742	113.273	155.43	214.802	23.8931	18.9971	0	29.2699	29.8624	19.1612	11.3145	13.2437	5.00659	4.7275	2.54228	4.32437	0.71341	3.24326	3.09242	2.33982	0.775822	17.9032	22.2644	25.1544	14.3681	19.488	15.4683
ppp6c	59.8603	70.4343	55.5815	107.856	138.25	209.577	16.2118	16.8263	24.7577	29.5632	24.7834	16.4683	17.0109	17.0929	10.7738	9.40882	11.9983	9.03072	9.03964	10.5768	12.308	11.0897	7.28147	25.477	27.692	44.3365	22.3038	18.1226	16.8578
NACC2	59.7937	67.2249	52.156	15.2657	25.3261	30.8161	11.4136	9.74082	19.6741	21.2322	27.8067	4.4703	3.78348	4.41739	7.05966	7.29266	7.61069	3.68709	5.28348	4.66523	8.42063	7.23272	3.95383	6.60043	3.41847	6.7419	4.78186	4.83315	7.80886
prss59	59.5744	72.8223	62.9197	50.1231	41.137	116.301	43.1518	48.4413	51.8938	63.2072	61.6491	47.5181	55.2735	49.1459	39.4834	31.7337	42.5657	32.7937	33.996	32.4172	43.596	51.3147	43.203	60.2051	55.6571	73.2747	57.7162	58.7471	54.4925
yipf1	59.5221	40.2205	71.5564	56.5795	46.922	64.0149	18.9533	16.3995	39.359	32.3908	40.5959	21.8728	22.2626	20.8051	16.4318	13.6451	17.6831	13.6482	20.0297	11.0995	24.4246	15.5862	15.9036	27.9682	21.2708	24.7379	35.242	34.2282	32.741
si:ch211-194m7.8	59.518	50.9481	142.538	142.468	34.1998	77.7168	14.1064	11.3936	18.0957	19.2846	25.1868	17.4548	20.5299	17.5814	12.49	16.248	21.5206	16.4867	20.1975	28.6828	35.1562	27.3524	21.2015	35.621	42.381	59.2497	10.5246	10.3697	11.5406
tox4a	59.4783	61.6257	55.8078	70.6283	76.2366	94.2903	8.96263	10.9371	18.3492	19.6626	21.1748	10.6685	13.7676	9.13634	5.81876	6.44635	8.25315	5.5	5.59786	7.60721	10.3726	6.17739	6.94262	24.1295	25.7402	28.3972	14.0073	12.3719	12.4831
srp19	59.3384	73.651	59.8231	70.7212	75.661	74.6885	11.9393	15.3939	22.8669	29.6642	30.1235	18.1663	21.1478	20.7487	38.103	31.8754	41.151	28.5195	34.4958	33.7015	40.8326	44.5859	36.6521	100.837	103.378	132.743	109.917	87.7429	89.6014
TMEM14A	59.273	72.5889	48.3508	35.0286	37.273	35.5381	13.2571	19.8016	18.2349	15.4159	16.7746	12.546	11.5524	12.281	8.14286	5.98413	9.34921	3.55238	0	2.1619	2.05397	1.33651	2.20317	47.8762	53.1556	73.1206	106.311	90.3317	81.4127
smim8	59.2581	51.5448	48.767	50.129	31.8351	48.8423	16.4982	32.3799	25.724	27.1971	24.9176	30.0609	40.914	42.5735	56.7491	48.0753	57.8136	52.4946	40.8925	57.3011	57.853	74.0717	56.0143	45.7383	59.0502	70.3226	64.4229	41.0143	61.9892
xip	59.1893	93.9118	71.9851	69.0608	59.7646	84.635	25.5645	29.5862	40.5332	39.3541	46.5477	23.8379	36.2782	25.6703	48.2938	31.1913	46.9376	41.3582	36.7241	37.5007	44.3501	58.8982	34.5977	51.9708	50.7028	90.6852	79.1242	71.5828	80.6477
xirp2a	59.1424	86.731	58.7747	45.1816	31.1655	41.5012	15.6164	13.0551	29.3613	30.8178	42.4261	10.6128	12.1288	11.454	16.598	17.8928	23.8308	14.6803	13.2903	11.762	18.5371	31.7365	12.795	26.9557	27.0012	33.3011	13.9509	15.0701	13.4077
ogal	59.1418	40.0046	48.133	62.9105	60.8723	66.1657	6.27353	8.30551	12.1474	19.7685	22.5518	10.6972	11.697	11.1624	0.635638	1.03703	2.69942	1.0894	2.52946	0.930033	1.78744	1.06219	0.450082	25.3465	27.9611	35.9764	26.7339	28.7039	29.8211
U1	59.1405	57.7024	69.3036	83.3742	108.646	79.2866	429	1164.34	144.18	114.513	174.59	1223.99	1622.88	1180.78	0	0	0	0	0	0	0	0	0.181708	0	0.644817	0	0	0	0
mogat3b	59.1377	61.9361	46.0699	81.1432	55.6397	60.7455	8.1497	8.56986	18.8144	23.4611	21.1637	16.7036	17.1088	11.4331	3.08383	1.77345	3.18862	2.14671	4.13573	4.01597	3.56487	5.21058	3.80739	7.12575	4.67365	7.86128	10.5299	18.018	7.52196
nop10	59.0564	60.0974	80.5641	60.6564	93.9077	59.241	30.0308	39.8923	54.2564	64.0205	64.5333	42.1436	39.6359	39.3487	68.9795	86.5538	92.3026	75.3846	104.759	92.4667	112.774	82.2205	86.8205	31.2872	32.9846	56.882	73.4308	57.9949	55.1949
zbtb20	59.0359	56.5405	62.3857	65.5966	58.3031	94.7535	14.2537	12.5665	36.052	41.1178	43.0744	16.6449	14.7182	14.7342	1.86143	2.78616	2.56226	2.34717	2.86289	1.42306	4.04444	2.95011	1.90776	6.33836	7.06918	9.26792	4.33249	3.50231	3.53375
cnpy4	59.0268	92.3221	55.0459	71.8428	56.4915	59.4529	11.0073	12.3851	18.896	17.6872	25.0244	13.7319	17.6361	15.9781	78.7262	67.3729	77.606	62.6564	53.1507	51.7051	63.1763	64.3274	47.7429	32.4411	26.1357	39.8855	48.2214	44.186	51.8635
cbr1	58.9648	46.6295	72.5587	80.1738	60.4693	58.4319	18.3359	16.7439	30.4285	34.414	45.6905	29.5841	25.8581	20.6908	28.0956	23.6901	26.9792	27.132	29.9501	27.9279	48.848	38.3218	30.8985	27.6114	37.6228	40.6964	37.9029	27.0503	29.0283
tnfrsf1a	58.8787	54.1164	54.4833	133.115	168.899	174.913	14.5818	10.9505	28.5787	32.8996	33.2371	14.8655	15.9657	16.1916	14.0334	14.1478	16.2092	11.4249	13.5152	12.1589	22.7817	17.3294	13.3665	83.6644	95.1508	117.753	23.6155	21.6818	17.1075
selenos	58.8279	30.89	22.1337	150.206	234.076	134.827	12.3388	11.5881	21.1069	19.3569	26.3323	12.4424	16.0747	16.5277	17.0519	13.7309	13.1909	13.3423	10.0082	12.6298	16.3653	15.237	13.1578	163.628	177.446	220.679	49.7384	43.7302	40.71
ppp2caa	58.822	74.5104	82.5296	56.7218	31.9354	57.776	13.1586	15.4148	17.765	25.6222	22.9348	15.4819	13.2325	15.1885	12.4351	12.9814	10.8194	7.20034	9.86456	9.47178	17.9986	10.6755	13.5336	16.4424	15.079	22.2523	25.9571	23.6783	21.2362
ETNK1	58.7787	89.364	75.9906	106.891	78.0652	128.402	7.46405	6.39636	21.7934	23.4071	30.5698	7.11651	6.25743	4.05814	18.1935	15.2836	17.118	15.0052	14.5176	12.2783	19.6819	19.4703	12.7563	22.9119	26.698	35.2087	8.93054	10.3675	12.0124
tnfsf10	58.643	68	56.1314	23.3691	9.94579	45.4041	19.1234	16.0388	26.5584	20.3628	34.5471	15.8887	18.3657	13.8249	12.7085	8.27231	12.6806	9.79608	12.583	11.4737	17.7093	17.2756	10.244	14.6776	9.02127	15.5108	17.4445	23.1776	15.6726
U1	58.5831	60.4454	73.8306	83.0247	102.859	81.9363	426.68	1129.81	131.822	125.61	175.29	1237.81	1552.46	1137.97	0	0	0	0.859756	0	0	0.859756	0	0.181708	2.57927	0.644817	2.0061	0	0	0
ndus5	58.5383	96.8271	82.5776	48.4519	61.4931	59.8919	32.0236	25.1513	52.4597	54.4401	85.5285	41.6857	53.0609	40.4106	95.9037	83.7112	130.198	95.0216	168.434	109.259	147.11	128.823	114.729	95.4185	68.3556	119.982	136.503	116.47	120.829
map3k8	58.5306	52.3528	22.1836	37.773	12.9326	49.4367	2.11761	4.6685	16.9127	15.075	23.0867	3.93054	12.7668	11.3638	0.834938	0.522008	1.84388	1.65199	0.77304	0.46458	0.151994	0.93879	1.29161	17.0647	20.6843	28.2772	8.3088	5.4945	4.96561
lyrm5a	58.4599	61.069	46.9641	38.1297	33.1272	60.9692	30.2276	19.4114	39.7211	35.3927	32.1026	22.0317	32.5233	27.1385	81.6045	53.6632	86.7743	51.8601	77.7934	64.806	79.4478	117.718	81.8806	61.0616	59.4487	87.1059	73.7519	73.3815	72.0622
UBE2J2	58.4271	68.1166	57.4564	81.3796	116.353	111.322	27.9786	32.4228	40.4375	46.4359	48.2565	26.0929	25.034	26.2081	33.877	25.919	30.3207	30.1152	30.6497	27.1985	33.6846	35.5473	30.4289	43.6968	38.4629	64.9956	22.9154	40.452	28.7308
sdf2l1	58.3378	57.3743	61.2473	440.869	422.565	477.793	16.3662	9.48784	18.75	35.123	30.1568	15.3203	9.70946	9.29595	8.94054	5.42973	6.74595	2.21892	9.25608	6.19595	12.9932	8.53108	6.94459	333.491	324.697	413.371	26.4595	21.3108	29.7757
tusc2b	58.2461	70.8995	60.9105	248.292	233.494	313.577	12.4386	14.2547	24.9101	22.5614	29.2042	16.3336	14.2465	15.3967	131.779	100.68	140.252	105.613	104.595	133.851	107.368	121.255	116.626	99.2868	86.19	125.855	28.9455	22.4426	29.084
pla2g12b	58.1718	37.3736	55.9259	225.819	276.955	407.947	30.2833	28.212	41.2046	40.5458	48.3472	35.8023	32.7722	24.6227	0	0	0	0	0.94537	0	0	0.975	0	57.9273	66.6768	87.2102	55.2454	55.5861	44.4222
U1	58.1501	60.3903	69.2687	85.3972	106.436	75.3207	451.079	1155.96	145.724	120.877	186.491	1290.03	1613.01	1219.29	0	0	0	0	0	0	0	0	0.181708	0	0	0.914634	0	0	0
zfand5a	58.0055	59.0256	57.4314	74.3487	105.198	137.542	24.0741	19.494	47.0867	35.0526	43.4128	23.2595	27.8732	12.2834	77.2194	61.3572	72.5852	55.1939	63.1999	61.1954	73.2866	59.477	44.3006	45.1854	38.4238	59.3011	41.5696	25.7816	33.6543
agmat	58.0043	47.1386	64.8353	37.372	29.3745	56.5605	7.75745	7.13009	8.86809	10.0973	7.90942	7.71854	8.98906	5.87295	19.0097	18.0079	30.1751	23.594	23.5094	17.2105	31.8511	27.0225	20.8432	99.49	94.9316	113.581	118.931	110.334	107.889
timm17a	57.9948	82.2592	93.0271	89.7426	90.4782	87.3997	33.8377	30.4424	49.7339	54.1963	63.7784	37.404	31.9747	35.1832	48.2024	54.5951	73.0454	44.9346	50.8202	38.8045	54.4049	60.2443	41.7749	44.3717	38.1571	44.7059	39.952	63.5846	48.7435
bcl2l1	57.9921	56.4948	37.0182	160.451	160.968	348.697	17.9903	18.2862	54.5773	54.6331	60.0904	39.8181	38.6361	30.2717	4.72165	1.14433	3.5943	2.22984	3.27047	2.83081	2.66525	2.8108	2.33353	56.769	59.9466	86.7101	26.9297	22.0115	26.4451
rab5aa	57.9148	56.9386	67.7438	86.5689	79.7438	110.345	21.6606	19.6652	38.422	41.4909	46.5497	29.5247	27.6209	23.223	23.8953	27.972	30.8079	19.5384	26.9047	25.0754	27.5891	23.2022	24.0455	30.1658	29.37	37.422	11.7012	15.5826	15.7744
TRIM8	57.9003	61.3549	48.9744	98.8301	87.5737	138.627	15.6891	11.1935	53.2617	54.6029	59.2931	20.6667	18.7541	17.1005	3.86014	4.75874	5.48077	4.05594	2.97319	2.33625	6.89044	5.89744	4.17075	29.935	28.2078	32.1853	12.7407	15.7963	11.1591
tbcelb	57.8591	112.171	82.2165	88.1491	96.8784	89.2592	16.2563	14.8383	40.5941	34.0068	52.3041	17.1781	20.4315	17.1211	4.77654	3.31371	4.08205	7.22925	6.0666	5.1279	5.35232	5.27703	2.96187	40.0275	37.8241	53.5227	55.3168	49.5907	50.9136
SNORA73	57.8111	57.6867	59.9317	87.7461	92.6575	84.2172	293.18	475.32	262.075	211.148	251.316	448.524	488.527	432.965	0.76	0	0.12	0	1.56	0.533333	0	0.266667	0.633333	0	0	1.25333	0	0	0
setd7	57.7378	83.9669	69.6491	103.176	111.091	134.414	14.4117	20.9645	25.5718	31.3013	41.0781	19.1396	18.6388	17.2721	127.814	102.382	122.099	108.632	87.211	110.144	132.031	133.462	117.144	54.4511	47.2464	90.4821	40.4377	33.0422	28.5091
tmem30aa	57.7338	59.0364	46.9733	61.4768	61.4005	80.2397	23.1052	26.0044	26.9592	33.5502	29.5199	23.4119	19.2296	21.7918	11.3755	12.4855	16.0793	10.294	13.1832	12.3468	21.4176	17.6025	9.64067	66.2478	61.213	80.8512	36.4367	34.1558	33.4761
kgd4	57.7286	71.089	55.4802	50.8816	36.7996	57.5083	22.0243	17.1793	28.7836	38.3585	29.7273	16.2157	21.9629	15.9552	195.233	115.261	183.477	128.642	172.311	156.854	185.325	171.871	167.037	71.4264	60.7189	89.0743	73.7932	70.2439	58.3073
polr2j	57.7116	70.9624	66.5987	36.2424	44.4859	50.8955	16.348	15.3908	17.511	20.7241	19.2581	14.4629	23.1902	15.8704	21.8997	16.7064	26.3647	16.1755	17.1902	22.953	28.0711	39.5057	15.9425	25.2571	25.3302	32.8548	38.116	39.186	38.464
adipor1a	57.6491	74.0276	65.1385	41.2398	25.0682	37.8793	20.215	26.7688	34.884	35.5645	36.4217	24.8722	22.0714	21.7913	30.8572	26.702	31.8203	28.8817	27.7428	26.446	43.1732	43.6848	31.5897	23.1878	26.2225	35.5049	29.684	30.0004	33.5621
jpt1b	57.6489	51.906	81.9474	76.1955	86.5299	92.3885	46.6461	51.8262	75.5596	77.026	78.8963	45.2866	58.5497	43.2203	210.713	193.385	223.091	196.363	193.741	214.067	243.962	275.283	212.157	97.2317	103.109	148.01	101.94	89.8597	80.8951
mafba	57.583	72.9633	62.0716	66.7306	43.7906	87.9069	15.3423	22.1917	34.8984	38.2915	44.4966	15.4397	15.3595	11.7422	6.71157	5.6338	6.51378	3.8959	4.75566	5.31843	10.0888	10.7159	5.11268	13.0649	12.7171	15.3399	15.3092	14.248	11.2939
thoc3	57.529	75.9985	60.5305	85.1236	103.026	74.0619	16.4493	17.4285	19.0012	26.4977	37.0541	20.43	19.7162	16.7189	17.1032	15.7227	17.0487	14.5151	16.7007	13.9969	22.2939	20.4099	19.232	23.2769	28.6381	41.3586	31.6365	27.1121	28.7858
abhd14b	57.4693	44.4423	62.8986	64.6474	46.1875	66.6652	14.7771	12.2842	55.1285	52.6274	60.5118	26.5224	27.6545	20.2547	7.45519	4.21108	8.75	8.72406	8.75354	4.76887	14.1828	6.51179	7.34788	46.658	54.9351	81.4139	45.5342	40.6203	40.566
limd2	57.4391	82.6493	74.0357	66.0101	36.613	107.362	9.6058	12.5072	24.5072	25.5	22.5087	19.813	11.3072	10.0543	4.15072	1.73792	3.34502	3.07826	5.1029	0	4.0029	3.29275	2.15072	14.5	27.0957	32.0217	24.9232	22.6855	13.1377
U1	57.2892	58.7561	66.3623	81.4934	112.6	77.5524	439.426	1173.47	138.724	121.932	179.013	1236.05	1620.23	1174.45	0	0	0	0	0	0	0	0	0.181708	0	0.644817	0.420732	0	0	0
zgc:101851	57.2886	67.4469	49.8908	112.146	168.399	159.788	15.8758	9.88777	16.8216	19.491	18.0401	17.498	16.9279	12.7756	16.498	18.6052	36.1162	21.2164	20.996	16.978	25.8397	19.0701	23.5411	72.4639	87.5922	96.8347	26.9028	22.5812	17.1022
mcfd2	57.2416	85.6554	64.6406	118.681	89.204	132.673	25.4673	30.5426	38.9168	48.7545	57.2139	48.9188	40.3921	27.6594	9.42376	8.85346	10.2337	8.69307	7.85743	6.11683	12.7069	11.2416	10.5545	58.0673	44.3347	69.5406	33.5228	33.299	28.2317
mettl4	57.12	40.9648	56.2759	14.8826	17.0676	30.5242	16.7878	19.5704	31.8316	33.7587	39.2192	24.6594	21.6208	19.637	2.21114	2.58684	4.89157	3.38223	2.9572	1.70083	4.06911	3.90558	2.24024	16.4735	16.942	25.1607	29.0358	26.0606	26.3914
timm17a	57.0665	61.1915	66.2649	94.5863	89.2728	102.323	17.7421	25.7579	43.4821	49.7054	64.4514	26.506	33.2014	26.7649	78.6766	66.4216	82.9504	57.5744	67.7659	54.3274	88.2044	78.2331	62.0575	38.4167	48.75	83.6329	62.998	48.877	49.75
zc3h11a	57.0502	61.5332	59.1412	82.2513	88.4282	115.923	13.222	14.0241	30.7592	32.7204	41.9694	14.4123	14.4321	13.3895	29.3163	26.9794	35.1579	22.5116	26.1826	22.3868	35.3651	32.4071	22.0321	19.2574	20.6291	28.1874	10.6255	11.0995	12.6458
rab5c	57.0467	64.9331	72.3824	59.4644	56.1764	65.0556	21.6429	23.9653	32.5658	41.3724	43.0011	27.3389	29.2446	26.2286	17.7878	14.493	23.4783	14.7976	14.935	13.9985	35.9228	38.6106	14.8113	47.7463	38.9376	55.5805	27.7439	27.5684	25.6397
U1	56.8707	54.7367	67.2842	89.5461	100.347	83.767	448.141	1202.39	151.781	118.259	176.721	1302.09	1636.03	1222.52	0.908537	0	0.902439	0	0	0	0.72561	1.90244	0.181708	0	0	0.914634	0	0	0
pard6gb	56.8441	53.6637	51.7263	80.3236	28.5406	45.487	8.78076	8.31469	8.13721	18.1879	17.5056	9.92841	8.45265	7.74497	2.3997	1.8777	2.14765	2.9038	1.5563	1.30127	3.13199	2.07457	2.37211	9.33408	5.79791	9.57271	9.5645	15.6331	9.07159
alg12	56.6127	65.2016	52.5314	132.923	133.919	132.331	6.1954	5.32714	14.5579	20.7356	35.1989	3.79576	5.13351	3.12997	6.02299	5.26879	7.09814	4.02829	7.4076	3.20248	6.68523	7.69142	5.33687	22.6799	27.9063	32.1211	7.52166	7.71441	6.04863
zgc:110319	56.5396	39.9195	45.3244	68.4376	67.0358	93.1523	21.4948	22.8356	35.617	29.0065	32.904	22.5559	22.8477	21.2539	75.2078	59.4953	77.204	60.0719	74.9385	65.9987	67.7173	85.8886	70.2979	41.324	50.9028	70.5026	52.244	42.7255	46.3236
faf2	56.4377	69.0091	67.3275	145.788	141.107	155.492	17.9493	22.4196	27.9347	36.9663	32.4866	22.7283	16.2623	17.6946	21.0884	18.3076	27.2326	17.1851	17.3696	20.5866	25.329	29.4293	20.4043	53.0409	57.4264	67.9696	33.3033	23.7254	25.7616
FAM210A	56.3891	58.3826	46.3782	104.874	144.896	109.18	23.1923	27.4581	47.1833	48.9845	46.464	25.4589	30.762	32.0388	40.4868	37.9244	43.9519	34.8849	40.0345	42.3012	46.4469	46.6302	35.9155	115.051	112.716	144.688	66.8407	69.455	67.0407
si:dkey-10c21.1	56.3606	36.6386	46.7313	61.6111	39.3737	71.8384	8.82828	11.5636	5.36364	10.5616	11.5848	10.6061	6.90505	5.81414	1.49091	2.08687	4.02424	3	2.88485	1.45657	8.77172	1.76768	1.90303	8.14949	7.38081	11.4889	14.6606	16.2444	19.9465
rdh1	56.3191	102.726	48.9744	86.8158	43.8253	91.5199	57.9663	58.4254	68.9145	56.1524	55.6667	37.9829	53.2018	43.4444	0	0	0.568851	0	1.68376	0.207977	0	1.21558	1.31339	14.9516	11.7702	17.2284	9.44729	6.0038	12.4141
cebpd	56.2301	41.4808	42.8568	205.301	138.991	268.892	35.8641	25.069	37.752	32.1107	34.8641	19.0371	14.2487	15.1121	191.669	150.32	184.367	165.902	179.902	193.578	87.3534	95.5378	67.3229	38.2228	31.4901	51.4343	21.0756	26.8342	22.5908
dctn3	56.1603	84.0952	66.8186	48.499	41.4038	40.6758	11.7495	10.9038	16.1824	22.4158	18.015	24.5862	24.3262	18.508	12.1423	16.8908	15.3607	10.3567	14.6192	17.3903	21.6759	19.6718	12.8246	39.2545	32.0817	62.9233	46.5331	50.2004	52.5777
cpped1	56.1263	95.0329	59.2261	54.1465	31.4098	55.7611	12.8259	13.8163	29.9236	39.5584	49.5149	14.2176	21.0117	21.6433	8.92887	6.1603	8.07962	5.79936	6.79724	9.69851	17.8386	12.1253	10.5955	16.6285	23.4183	26.7155	26.293	26.2856	30.6518
lyrm5a	56.0187	33.7882	42.514	46.6324	71.0156	54.3489	24.5981	24.0467	34.7445	26.4174	31.9782	28.8006	33.0903	31.6044	26.2882	11.0093	18.4642	17.0093	24.3598	15.8629	27.919	29.9159	24.3178	55.9626	48.6262	73.2399	51.9529	55.7477	54.796
PDCL3	55.9972	81.6516	78.7193	122.263	125.811	115.921	37.2644	33.3168	59.4126	60.4442	53.066	34.6432	38.4504	30.584	460.432	364.789	482.493	446.925	384.471	436.257	471.531	631.455	527.682	62.2773	67.6235	101.392	60.699	65.2418	53.5378
rnf114	55.8471	39.7942	52.8728	29.8422	20.6121	32.333	13.7534	10.8884	29.0272	32.7733	31.0549	14.7296	19.0558	16.0558	6.54563	9.65728	9.86505	6.97767	7.75534	10.6932	7.62379	10.2971	7.22864	23.5311	34.5199	29.9029	26.8879	16.4296	18.768
hsd11b2	55.8322	49.9294	68.0219	57.8427	30.4865	125.211	21.8208	23.0588	48.8909	61.4368	49.2613	29.2267	29.9736	20.189	34.7986	41.5273	54.4476	25.9856	32.3782	24.9316	32.8285	29.5321	24.8839	17.0481	14.5686	21.9789	7.20638	11.9461	10.94
id2	55.573	102.232	108.41	46.0037	13.7163	39.7079	11.8408	14.8165	20.0899	12.2594	19.7631	9.64139	11.0655	9.48408	6.25749	2.31367	3.05243	6.99625	8.55712	5.85768	10.9888	7.51311	5.19569	19.2921	14.7107	19.4288	8.78277	9.88483	11.1554
plgrkt	55.4784	46.2384	47.5248	44.5895	22.8328	28.7087	16.1424	21.164	37.0394	38.0696	36.6969	27.1688	30.849	25.3873	31.4709	21.4331	27.4074	21.4364	26.0313	24.4919	32.1359	24.5313	23.5043	32.6483	27.1289	58.6224	63.1405	57.0399	54.8339
rbm12	55.4457	73.3425	83.7802	44.7768	45.9985	59.075	10.3566	9.52381	21.9638	24.768	28.1181	13.9021	12.9756	9.69333	14.4004	13.7029	16.1154	13.3688	13.117	9.85562	17.3764	14.7387	10.779	8.55086	9.44076	9.23276	11.9006	9.38819	10.8629
ppp6c	55.4338	75.0009	62.3108	58.2638	70.3766	74.2816	9.98775	12.1427	14.8912	16.9054	15.6896	13.538	13.086	12.8358	54.35	45.6488	60.1611	45.9617	38.7403	43.8596	59.8147	56.6466	49.7805	29.6363	32.0873	43.322	19.2433	17.7511	16.5853
PERP	55.3145	68.9487	55.6406	67.1162	32.8556	141.51	17.6098	10.681	9.16303	16.9365	18.38	16.3652	7.99872	8.21887	41.3203	7.45379	19.7125	31.0963	15.8241	20.5764	116.551	20.4166	14.2221	28.6804	28.7015	50.7375	55.6983	49.846	53.6714
EEF1AKMT2	55.2658	55.3887	67.5028	44.1238	25.8431	48.4334	14.4171	14.1769	20.0084	19.5782	22.5289	14.3059	15.9707	16.6248	11.0317	13.3613	12.0549	9.81285	12.8566	12.4451	17.9204	17.8878	12.9981	18.5251	24.4655	20.4106	20.4823	19.3808	23.4167
sptssa	55.1518	71.2797	44.2947	80.1568	101.801	96.4705	23.0689	16.6294	24.3117	21.8621	26.8042	17.2338	16.96	14.3047	16.5225	6.58841	10.7702	11.3467	4.76523	8.49451	14.0839	9.88611	7.5984	49.3147	54.8252	68.2118	32.8032	26.8422	35.4735
ccl19a.1	55.14	9.22657	52.1015	0.978299	0.40625	9.85156	5.32418	8.4681	2.07552	1.87109	1.4401	10.1967	5.11198	2.75	1.1901	1.17708	2.00521	0	0	1.62044	1.39844	0	0.33138	1.6862	1.11719	1.5082	1.67995	2.54036	0
fam219b	55.1199	53.8018	48.0909	36.9334	32.1527	47.0711	13.1793	17.1751	20.4689	20.7232	17.9826	15.648	17.0807	11.9519	14.8581	8.65229	16.2872	10.6306	11.0799	11.7372	15.4735	14.747	15.8011	35.1081	36.0237	50.3257	39.5174	36.5307	37.1068
eif4ea	55.0745	68.6248	90.3695	22.5305	9.54894	23.873	2.35603	11.5333	7.05816	8.97518	7.25816	9.56028	10.3248	4.72624	16.3404	20.3092	15.4404	21.5851	13.8709	13.3021	32.583	18.9156	18.5645	11.166	8.10355	13.2255	23.0057	23.2014	20.4277
fa2h	55.0471	44.8159	97.6662	31.2731	9.31722	13.4444	3.96098	4.05513	5.07125	6.6268	9.64885	2.45717	3.6531	2.17303	0.908397	0	0.223919	0	0	0	0	0	0	6.67685	6.96523	10.3232	10.877	11.341	8.75997
thrap3a	54.9911	57.7014	33.7707	18.7198	6.1435	29.3332	1.38566	0.288224	1.99739	25.519	1.1137	2.83896	3.89612	2.02763	3.33737	1.66396	2.6621	4.10055	11.5743	3.70775	0.329163	1.15357	0.801402	10.3468	2.16082	14.3613	0.338449	0.371714	2.42093
zgc:136858	54.8794	61.8327	86.6978	18.8238	14.2337	30.3928	12.2644	13.236	25.7133	26.2888	23.0634	16.2524	16.6226	14.4111	8.8214	10.9754	5.17812	14.1803	8.01615	7.5757	12.8389	12.4209	9.44545	15.8967	13.5721	22.8715	51.7877	50.396	50.0814
zgc:56106	54.8291	46.1242	49.0085	50.2675	31.8206	53.2473	22.2298	25.258	40.2696	25.2824	46.3047	25.1077	34.6412	24.9634	71.9671	59.2357	73.2017	60.293	65.8896	63.3668	93.0541	77.328	68.2707	68.2479	54.0101	79.0955	53.7075	52.0669	43.0239
cab39l1	54.7963	69.8087	48.1619	60.5009	31.5077	74.2258	14.6922	13.2022	16.258	20.0118	22.3809	8.15271	12.5563	9.26238	6.71344	5.38208	5.57665	4.46521	3.87264	4.82193	6.53243	6.14328	4.16804	19.3069	15.9204	19.4469	16.8906	11.9976	16.0846
DPY30	54.7224	37.4765	47.6745	42.4182	62.9985	54.1588	19.6698	29.794	17.6541	36.8994	23.4711	15.7767	33.4214	22.25	95.6635	51.8396	89.9387	68.7248	54.6761	47.2767	67.7898	83.533	66.9591	72.9041	73.9151	109.931	95.511	74.6148	104.497
rflna	54.7083	43.277	52.7482	46.2711	25.8136	47.8986	18.9228	15.9412	21.9334	20.7487	25.5127	17.3984	14.7204	14.1019	18.8347	14.9054	17.528	14.8005	15.7531	9.68238	11.2015	13.2024	8.03712	20.8253	24.0477	30.089	14.3282	13.4641	13.9028
arl2	54.6766	48.0332	42.7029	71.2985	70.9972	46.7666	10.831	5.36427	4.26454	13.4211	9.09741	10.097	9.52216	14.9114	12.223	7.77701	15.2742	9.06233	7.95914	6.88089	14.7812	9.31579	7.40236	35.349	30.1662	52.9321	44.3691	41.8573	55.5152
cdip1	54.5398	72.3677	58.458	77.2447	67.6124	122.494	6.20183	3.92508	27.2278	22.208	30.7125	5.37003	11.9916	6.87615	17.6185	11.8081	12.8838	10.7393	16.7026	14.5742	21.2439	11.0367	15.9679	38.3991	44.6957	46.0092	18.7141	12.3914	14.1162
sostdc1a	54.5038	87.7945	64.4399	27.7306	2.46575	4.39574	29.2801	28.9102	45.0426	52.9513	37.7002	37.3957	34.8524	29.5814	0.342466	0	0	0	0.834094	0.439878	0	1.19026	1.0137	0	0	2.04262	6.44444	4.41857	5.44901
cq032	54.4219	64.5265	53.0731	68.8105	80.8515	102.975	21.6671	21.9555	29.887	34.6559	34.2264	17.173	22.9001	23.1223	36.2781	31.2991	35.714	24.1768	24.5007	26.3026	32.8346	36.3425	23.7398	25.8994	30.7085	40.9596	25.4545	25.2595	22.8119
cdc42ep3	54.3971	74.9343	67.2048	62.4155	37.8232	118.708	11.6145	3.96618	8.21256	6.38841	7.56425	3.42029	6.22222	6.30918	3.21063	2.54589	3.63961	4.45604	3.3971	2.63092	2.5913	5.61353	4.08696	2.24734	4.54106	2.35073	2.02802	3.82705	3.00773
U1	54.3945	61.3437	66.1032	89.144	103.733	78.4235	438.008	1160.9	153.418	125.296	192.555	1287.46	1577.71	1194.91	0	0	0	0	0	0	0	0	0	0	0.644817	1.80081	0	0	0
lsm4	54.3781	68.7146	42.9534	44.1165	29.7446	35.6716	18.4229	19.2115	26.0475	29.0197	40.5152	28.5753	28.2823	26.4875	62.6165	61.1729	76.6375	57.6389	51.6685	46.3212	78.0224	84.0336	57.4763	47.5833	48.2428	71.9427	72.9005	70.3414	62.5896
sec62	54.2773	71.188	59.8693	76.0868	87.621	98.2154	19.0533	17.3423	15.4257	19.7355	26.427	7.08887	9.1971	7.97095	2.92946	4.60373	4.98617	4.51176	3.23237	4.23375	8.25588	4.41978	3.94329	25.4789	25.7303	28.6905	11.0941	15.0851	12.4039
qng1	54.2112	51.9176	48.9814	94.7826	106.422	189.907	29.2289	17.3416	47.2354	40.9041	51.0218	24.9484	31.6091	21.1865	8.48955	5.92172	8.47406	4.50761	7.3939	9.92176	15.646	12.3603	6.52076	49.436	58.0373	83.3251	60.7749	50.9688	51.8647
rab7b	54.1507	84.9084	70.4897	90.6158	52.6133	91.8325	23.8956	14.3882	21.5882	27.0089	20.1931	16.3995	17.9911	20.6887	8.88374	4.89655	8.22463	4.17438	8.46207	5.27094	7.13202	7.98424	5.08473	30.6158	33.7929	51.6788	33.665	33.8187	31.5438
apip	54.1283	61.0405	70.4613	57.411	99.9464	53.9213	18.6875	14.4637	26.075	35.7253	30.4252	22.5472	35.7074	17.3728	66.895	58.9833	70.7514	81.4923	67.3433	53.2379	70.6843	60.0851	57.8079	38.0511	51.7287	58.2359	39.4162	34.9664	36.1009
neil1	54.1031	92.1603	46.6973	80.92	44.4174	56.1313	23.5554	24.0067	25.5038	33.2267	43.4738	26.1605	21.9374	19.719	14.7226	14.6431	22.9508	13.4756	16.2826	14.9579	24.7728	15.8097	20.2188	22.8036	22.0287	23.3846	17.7456	16.4831	14.5918
klf13	53.9542	51.7429	36.2073	65.0277	130.068	178.452	24.1808	19.3073	36.4542	41.7516	31.8418	8.17345	10.1582	7.70339	6.06723	10.6525	9.66271	6.29831	3.95254	3.62542	4.43333	2.78023	2.88192	7.73051	11.8	14.5051	9.15819	7.4	8.3791
nmnat1	53.9491	57.2525	59.093	145.018	125.384	117.164	16.2913	10.8837	23.68	27.67	30.01	13.485	11.4928	13.0498	15.7431	13.1816	15.8162	15.5006	10.4928	12.4585	28.6578	20.459	15.4053	64.2032	71.5891	102.143	18.9579	23.1728	22.5149
arhgdia	53.9251	66.9578	76.4035	123.828	97.4226	131.581	17.2817	12.4559	21.0374	31.5632	31.6039	15.9506	17.3647	16.9095	43.4571	27.1798	45.4926	36.0956	28.7636	32.9088	65.607	43.5951	31.6383	31.1179	36.4559	38.2949	19.8951	17.1494	16.1355
creb3l3l	53.9022	55.8489	60.4194	136.994	168.14	160.415	17.2539	18.727	35.2145	44.4699	45.557	27.3268	24.3472	22.1776	22.7557	21.736	25.1525	25.171	23.2146	23.55	30.3793	25.9757	22.1819	148.055	151.383	185.994	80.5359	79.4078	65.9791
cideb	53.8328	27.6303	46.7429	71.8828	87.7127	88.9031	38.913	39.5438	72.5222	73.847	95.5177	51.8316	54.1316	56.5279	0	0	0.32537	0	3.87372	0	0	3.2025	2.10637	140.813	156.227	209.58	115.903	130.603	116.819
etf1b	53.7472	72.6908	70.0214	49.9927	70.5139	70.2952	13.7131	12.1607	21.8691	25.4014	34.7986	18.1815	13.3646	14.795	32	34.6976	38.2673	30.651	27.7173	33.6202	37.4911	37.1041	28.8858	30.2642	31.4236	36.5331	15.8805	16.5962	16.2212
mat2al	53.745	70.438	87.4067	60.2566	35.3625	69.7594	23.8696	26.1772	39.6971	49.9041	50.3098	35.9472	40.9322	35.2019	3.2521	2.04035	2.20562	2.23951	4.47418	4.76178	4.76436	4.26146	3.69287	22.0686	23.7553	35.6427	47.608	38.1545	44.659
cdv3	53.6717	65.3969	70.5497	70.8155	59.9588	63.7289	20.9816	23.1056	33.0402	37.936	47.5048	30.2037	32.0971	21.9513	42.4918	30.4428	49.1434	30.1849	27.7309	28.7422	37.9881	41.0477	28.1226	33.1424	27.873	30.2166	31.2875	31.1049	28.8195
cisha	53.4218	13.9351	50.8938	22.8083	16.5737	41.6298	4.90413	9.78909	17.1711	11.5236	8.13569	14.8363	21.1327	11.9956	1.27434	2.22271	3.25074	5.54572	2.07817	6.26696	1.83923	6.08112	2.71976	10.0767	11.7832	14.8879	1.75811	1.97493	3.60767
LHFPL2	53.4123	45.0478	37.4051	122.16	106.799	136.576	12.1667	13.5467	19.9728	21.9442	23.3748	18.0457	15.6459	12.9309	2.44821	2.28926	3.19385	1.80482	2.97005	2.27117	2.89876	2.55873	1.80244	51.9297	46.9665	59.6578	9.03576	11.7409	6.88356
arfrp1	53.3692	51.5901	59.8289	84.8124	87.9456	117.89	27.6057	26.0531	49.3468	40.4392	49.7045	29.1757	32.2059	29.3312	42.4419	31.6519	50.0339	44.4273	36.5215	35.871	46.1857	49.7178	38.5572	42.7804	39.5435	54.6491	38.5924	35.7822	28.1382
mrpl54	53.3294	59.5551	61.0667	59.59	66.1875	49.4131	27.2945	28.0731	54.9311	56.6239	48.9206	37.8125	38.4894	35.4778	50.1059	45.3941	55.7987	38.4894	47.5678	41.5328	70.375	60.8909	50.8877	74.8856	72.179	99.3792	105.028	109.486	116.073
cxcl12b	53.2494	14.0813	34.2357	39.6045	10.5905	28.5508	7.88283	9.61237	23.9926	22.4993	32.1982	14.5088	15.275	14.4829	12.3392	6.64791	16.0257	14.5448	19.426	20.689	10.0436	11.8057	10.0995	3.35075	2.3957	3.92816	1.63619	2.15348	2.06627
znf644b	53.1659	57.1285	15.1714	18.0537	0	0	10.5147	4.49875	20.5421	20.5475	23.377	2.43316	0.620741	0.90824	0	0	0	0	0	0	0	0	0	0.833665	0.528308	1.37475	0	3.41188	1.02784
rbm45	53.1378	81.3502	73.6579	84.6937	129.714	136.168	12.2304	18.0529	21.5096	18.2283	18.7052	16.0469	18.8785	18.849	39.5872	31.0277	40.7777	29.5851	28.8562	31.2813	42.2641	39.5572	28.7229	48.991	46.2295	60.9335	25.3631	30.7638	22.7515
fgl2a	53.1281	62.8781	55.5864	112.877	90.3501	146.135	27.4554	34.1001	43.6075	41.8076	54.3295	35.1001	26.8815	20.0456	58.0595	51.7564	87.9717	27.2684	41.4037	44.0125	48.064	73.2887	34.1558	47.6617	45.5872	55.7898	18.9472	20.7777	15.7409
TMEM30A	53.0119	60.1269	57.584	88.632	66.4	99.2772	12.4511	16.4402	28.5849	33.2018	27.7338	13.1005	14.1434	16.6128	26.4219	24.6174	30.726	21.4292	18.7379	24.5315	25.1096	26.8329	21.2836	63.7511	71.1918	94.1416	47.4123	48.7078	55.5014
rcor1	52.9266	65.1942	48.6105	31.3062	8.93392	23.6894	6.23128	7.08811	16.478	16.2588	17.9956	12.2757	10.4677	13.6197	5.33994	2.47907	3.45521	1.89391	3.31131	3.07709	4.93686	4.25918	2.23201	9.7812	9.13583	13.0576	14.0323	20.0224	17.5514
rela	52.9165	41.1527	41.7866	87.3942	207.473	123.255	11.5882	11.3361	19.1753	22.0316	24.5357	10.9888	8.63158	7.10352	5.64323	4.4433	6.25302	3.56946	4.16557	5.03071	5.70318	5.80378	3.44201	46.4093	45.2494	57.0141	13.1857	16.3367	13.0599
if2b	52.914	76.0063	86.6987	93.868	108.13	106.306	29.4659	37.3204	53.8529	58.9025	70.027	56.155	50.1796	51.3727	107.021	124.278	143.381	137.877	131.006	126.062	156.454	167.816	135.444	108.511	119.133	158.716	108.076	92.1372	87.5821
tmem30aa	52.7919	79.9959	60.1635	103.961	107.463	169.156	25.173	23.0572	29.6761	36.1486	40.1216	22.6072	16.9279	17.5342	11.5315	11.7234	13.6847	9.03874	13.8991	11.1595	13.7802	15.5775	7.90811	43.6306	45.6306	62.2662	23.4559	22.0288	24.2077
cops9	52.7733	76.3733	59.1422	41.7778	39.8978	32.7378	26.0978	32.6356	13.3156	12.2933	15.0711	28.9022	33.7022	27.0578	164.569	99.8756	175.376	122.773	167.613	119.747	173.787	219.196	146.673	75.1911	87.5644	125.453	106.122	102.709	100.8
lsm12a	52.5347	59.0372	66.2648	56.6954	52.6252	66.132	21.6531	15.9949	27.934	30.1404	28.0178	22.6151	16.676	15.2014	27.033	30.3287	27.5364	18.2217	33.3672	27.8249	29.3012	40.9695	28.2217	63.1878	60.9992	83.0575	51.1836	40.4044	56.5228
socs3b	52.3992	58.4296	46.6157	73.8684	49.5506	69.5803	13.6362	10.2335	17.6645	24.9151	24.3662	8.71267	9.77141	9.31847	7.02619	6.21868	9.53503	7.01982	12.9101	6.4862	8.77601	7.09059	5.99505	22.5131	14.23	19.598	6.02335	5.22718	5.94409
ube2l3b	52.3486	74.0391	78.9648	66.5119	70.0256	76.7687	18.1733	22.4287	17.2223	28.2354	20.5491	27.7639	24.6186	20.1999	30.6065	38.0108	35.2498	30.0507	29.5655	31.1814	47.4154	38.6718	33.6847	41.7392	47.6021	60.0645	62.2402	60.1217	51.8613
mief2	52.2865	43.103	55.7502	72.3295	58.1379	64.7813	19.8304	12.918	31.9642	28.8432	36.666	16.5933	15.0554	12.5193	75.2526	66.7079	81.6673	64.9929	66.4633	66.8418	76.262	89.1652	75.2693	44.5853	42.3399	45.3158	24.3536	28.2613	22.7222
SCARNA10	52.2806	24.8129	58.8997	70.6871	50.0969	79.0748	220.906	236.182	235.624	220.704	248.151	314.956	331.9	238.883	0	0	0	0	0	0.659864	0	0	0	0	0	0	0	0	0
gask1b	52.127	58.3069	39.1591	31.4497	18.1214	47.8472	5.36792	7.10943	5.93648	9.69497	8.14906	3.35283	1.69748	4.53396	7.96101	8.43836	12.5591	8.01572	9.99308	9.89623	12.3	11.8321	6.71258	24.5195	23.1308	30.5943	23.5069	18.212	15.8937
si:dkey-118j18.2	52.0864	64.2659	62.0864	46.0907	29.3677	48.335	8.55274	12.2918	18.4682	16.95	18.0463	17.0531	13.562	14.6157	7.41579	7.50956	9.5145	7.37569	10.9448	7.54843	13.1641	11.2455	7.97162	21.9312	26.574	31.649	25.8694	26.5015	27.3597
RNF14	52.0526	56.6857	52.4664	81.4616	66.6982	102.645	16.9328	19.5608	42.127	44.7088	41.9416	18.4107	21.0299	18.8225	63.5023	40.6671	56.8938	41.1385	50.1493	47.1551	62.7911	61.0435	45.3428	51.4776	54.1752	72.0417	29.3863	36.2593	29.4257
ZFPL1	52.0135	47.803	41.9785	207.435	209.99	241.469	10.976	8.14991	15.9013	22.5939	30.1705	12.568	15.3046	8.53321	7.21221	4.19608	6.14421	6.47818	4.31752	6.53068	8.11765	5.50474	3.58824	118.449	142.405	187.447	23.5003	24.0266	26.1996
PITPNC1	51.9223	11.895	66.2683	16.6683	14.1403	27.4517	2.87302	1.14445	15.1957	20.1016	22.5686	13.4422	10.0883	2.01731	0	0.232568	0.183669	0	0	0.129072	0.407768	0	0	0.650695	0	1.95614	1.3528	1.81804	1.88428
ybx1	51.9217	47.4906	1330.63	107.291	565.687	107.929	33.997	28.6973	50.7092	50.6985	1113.15	24.8797	28.8019	30.1871	1892.21	1438.42	1827.87	1506.23	1960.19	1553.62	2562.08	2045.13	1771.29	1514.48	1536.93	2215.44	209.365	2014.26	175.429
bdh1	51.8621	43.7994	47.731	49.0173	42.6925	50.3158	12.5275	10.1487	24.3048	24.6399	27.0598	14.1126	18.0528	15.4694	6.33967	3.31951	7.07785	4.83619	4.73131	6.44903	5.9912	5.80074	5.23726	9.44027	10.4451	15.8798	15.9861	20.2329	14.497
gmfb	51.8475	78.9559	68.5967	50.1358	34.8589	62.2725	10.3148	13.9205	12.7306	15.7666	13.3098	14.8094	10.0563	9.68461	7.86639	6.39268	6.83479	6.84919	3.25657	5.98686	10.6715	7.73498	6.18805	7.93492	8.10357	13.3692	12.4446	9.81508	12.5519
REEP2	51.6843	48.604	50.2284	32.4722	12.5608	31.8956	13.6865	12.598	22.3624	19.6766	20.5246	10.031	14.3863	11.4568	7.88356	5.95969	9.3167	7.70313	4.85477	4.97617	6.16411	7.12444	7.32693	9.58413	9.88356	11.6913	13.8033	16.0056	14.9822
plekhj1	51.6282	60.5737	53.6571	127.271	108.999	93.8686	2.96795	9.27564	22.3526	17.3355	11.9103	15.5427	11.0235	7.87714	3.77564	3.23504	3.36966	2.66026	0.91453	1.42949	3.07692	4.1047	4.52991	6.91667	8.96581	9.11966	4.75534	3.44444	1.95513
nr1d2b	51.5835	20.1659	36.8596	52.1919	69.5575	87.5614	6.79147	7.49558	16.5507	18.493	23.7514	17.0801	13.2392	9.883	12.0593	9.4571	9.02808	7.9974	6.18929	8.24077	9.15133	10.6578	8.89756	9.27873	18.5705	18.6609	9.3817	10.3843	8.24597
prss23	51.572	86.0815	35.2683	111.444	67.7992	249.292	23.4733	20.1226	69	63.6272	84.9852	50.0551	32.6263	29.3712	8.34732	10.0831	11.2444	7.97037	11.6889	10.0658	17.9918	15.2551	13.3901	2.6535	3.74897	3.58107	5.02222	4.04691	8.84362
pgls	51.4722	46.8439	53.6525	53.5706	37.1184	49.3558	17.6235	13.3682	25.9867	22.0235	30.7659	18.8564	21.1966	16.0086	5.89099	1.09924	5.3457	5.1511	2.92001	3.08073	13.6533	2.85207	5.69205	48.6188	49.6876	74.9298	74.1853	58.1449	63.5513
tmem14ca	51.4654	74.517	67.1447	46.6356	76.2278	81.5413	58.9682	65.1356	89.8503	111.962	113.856	73.5138	96.1197	75.2818	147.947	116.896	176.085	110.518	129.472	113.204	163.462	176.249	148.923	47.1144	66.7585	104.917	101.151	97.5773	118.593
mrpl28	51.3337	74.4714	80.8226	79.9729	71.1929	53.1222	35.8938	41.506	81.4098	90.2746	83.0381	36.9359	61.9699	54.5281	87.3497	68.9168	87.0431	87.4997	92.3848	80.8267	94.5882	103.929	99.3397	47.74	44.3432	67.0867	68.9569	52.8627	65.3547
irf2bp2a	51.2572	69.5503	69.9912	127.727	69.2459	166.529	16.5597	16.6415	44.3157	47.5541	57.3176	17.822	21.7151	16.8943	16.0899	13.8899	16.7761	19.2239	20.622	19.0075	18.0107	16.9396	12.773	37.5308	43.1321	52.2899	21.1094	20.5774	24.0409
zgc:136439	51.2396	53.7452	78.6228	38.2937	27.9924	65.1805	7.78564	7.89838	13.4732	15.0142	25.1274	21.3908	14.3953	11.8625	14.5602	5.21941	14.0298	9.96158	9.82508	7.54196	15.0789	8.21537	10.7386	16.8453	13.7108	24.6031	49.7887	41.3453	41.9171
fitm2	51.225	57.3805	42.2837	305.62	587.41	1066.66	13.1836	13.1224	30.3474	27.5682	30.6749	16.0331	18.7411	17.4549	2.99669	2.12324	1.93383	2.53267	0.966088	0.772539	1.92887	3.05625	0.866005	43.6824	58.5327	97.043	14.976	14.5682	14.0496
id1	51.1451	85.2349	64.5421	35.5852	11.756	48.2416	17.7981	9.46162	17.3028	23.1041	16.1851	6.80137	13.061	8.28146	46.1504	34.5573	60.7912	31.9227	53.1735	40.1651	49.9832	62.3501	36.5289	9.15563	6.0326	8.82965	15.7336	19.4427	16.2818
sdhdb	51.1057	50.3182	60.1985	48.3302	47.0673	48.7487	26.1061	21.5964	30.4994	33.2142	34.766	31.2629	24.5695	18.6116	69.5382	53.3293	72.5229	53.3099	54.4668	61.4416	56.7924	73.1659	52.4874	24.9513	25.3611	34.0681	44.0615	43.5357	40.4775
rorca	51.0383	46.8015	60.0785	47.0011	30.2955	64.3284	13.8184	12.1455	20.5218	19.3016	19.5212	20.0437	18.7454	15.0441	27.1263	21.1634	25.0759	28.4667	22.9576	20.9676	34.6353	35.7648	27.5817	15.1258	17.2948	23.125	26.2877	22.6995	21.703
hmg20b	51.0008	56.6644	53.68	26.0759	13.1273	25.2209	11.903	13.2595	21.8523	22.1695	26.4553	21.6686	18.059	15.8019	11.4709	7.37774	9.81872	6.40472	7.52614	9.86509	11.6505	7.88364	8.83896	8.64924	8.83727	13.7914	22.3962	23.7677	15.9621
pex11a	50.9771	72.1093	68.085	71.7598	57.2672	35.0796	7.64777	9.20243	13.4912	9.79757	14.8812	10.0702	6.76113	10.1862	0.669366	2.99325	2.17814	1.52227	2.45884	3.03374	2.29285	2.44534	0.496626	29.7881	23.6221	36.2935	33.2294	34.3509	35.2537
rest	50.828	45.6694	41.0817	45.806	38.6903	56.9029	9.62977	10.6331	18.4556	19.9442	26.3574	12.6566	16.0948	13.3672	7.57578	6.28728	9.43794	6.31442	6.34523	5.05703	8.32174	9.53431	4.16804	22.6292	26.4995	28.5935	11.2043	12.1519	12.0339
homeza	50.782	63.7728	68.2498	147.651	153.271	186.554	13.2382	13.2469	28.0677	34.9803	43.0178	12.2584	21.5062	20.0836	7.26609	6.2853	8.83573	3.22574	6.01489	4.96926	9.76849	5.98703	3.31172	39.3477	39.0355	60.5658	9.2512	9.05283	9.33477
RNF13	50.7737	50.9949	56.7748	50.7908	29.7139	39.0203	25.2734	25.0033	44.8437	54.1933	49.8749	19.7536	26.1922	22.8546	16.8434	14.3093	22.5105	13.3727	14.7799	12.5685	17.9869	23.0587	14.3854	26.3274	23.3974	33.9782	29.1247	31.9144	25.9873
SNORD10	50.7343	53.6853	40.3846	29.5315	30.2378	90.4056	7.72028	8.23776	7.11189	7.54545	16.972	27.8671	18.042	13.3357	0.727273	0	0	0	0	0.909091	0	0	1	0	0.125874	0	0	0	0
crkl	50.7314	49.192	47.5365	53.5529	29.7862	59.239	9.58283	9.57036	15.5091	15.3577	22.845	10.6794	9.09298	8.32811	16.938	15.7615	18.7515	13.8814	14.2081	14.0053	18.4019	17.5597	16.2651	21.476	17.6247	22.6819	14.4688	15.5981	13.2031
ctso	50.6075	72.0905	50.7037	27.6205	12.61	32.3626	15.4184	14.0574	16.781	15.6339	17.939	11.1473	15.2118	16.4217	3.44716	1.81957	4.2026	4.77523	3.27707	2.76835	3.69252	3.7633	4.63205	17.1659	20.4402	27.4995	32.2768	32.964	38.0081
nfil3-6	50.5647	67.8543	72.9923	150.801	151.588	238.482	18.2528	12.0746	27.2476	29.1894	32.5947	14.5039	12.9923	11.3505	20.6598	14.4327	21.8123	15.0146	12.6787	16.9417	23.6495	19.4859	18.9614	20.2177	19.5416	28.1191	49.7048	61.1281	49.994
ca7	50.5526	17.5113	0.640558	8.60193	4.25215	1.66309	7.05794	0.888412	26.8922	31.9721	29.8927	11.2929	13.4453	12.2951	0	0	0	0	0	0	0	0	0	6.58262	7.72747	13.8283	4.80687	1.9603	5.83047
tmem9b	50.4926	77.2359	58.2615	68.5426	58.0699	63.2559	16.6564	13.5086	27.8669	32.5345	25.4248	17.5613	15.2955	15.4224	9.46073	8.5728	10.1245	7.51293	7.69899	6.54334	11.4255	10.6149	5.40996	35.5206	31.8731	50.0067	35.6815	42.5577	42.1075
ptpn18	50.2372	66.0668	52.8365	36.6355	16.6571	34.085	18.3236	8.45515	13.6252	14.6625	21.0897	5.83655	8.41395	6.08804	3.50432	0.816611	1.9608	1.58737	1.19801	2.24452	5.32226	2.04385	1.81063	11.6063	9.78073	12.3203	14.6684	19.1266	17.3209
atg12	50.193	36.4539	58.9132	98.0655	94.8005	113.794	8.43452	6.49107	18.5089	28.0764	22.7282	13.9147	8.08631	4.14286	11.9975	11.8755	9.23512	9.25496	10.3433	10.9812	13.752	14.5268	9.97817	53.2044	53.8919	69.6686	30.7153	23.2034	26.3095
iip2	50.1181	89.1401	18.1308	84.8452	22.3997	67.3089	33.4121	16.5385	52.8173	90.033	77.8243	26.5632	25.2294	32.5893	10.8832	18.0563	20.2486	9.75275	24.3777	17.6305	13.2541	20.3269	21.3846	114.647	113.652	167.756	42.6663	38.9053	46.0673
fam8a1b	50.0702	36.095	35.2517	69.6627	68.2844	73.2552	6.99802	8.9001	20.3383	18.4807	25.1325	13.2908	10.8942	10.3393	10.3412	13.3215	13.186	8.50841	12.636	9.52423	12.2473	15.1197	6.92285	26.4659	27.2354	34.0455	14.9802	12.1939	12.0613
hapstr1b	49.9689	67.4982	95.0497	140.484	119.374	83.4335	31.1556	27.9832	39.4625	59.7321	64.4712	30.7441	27.4936	22.6647	22.3749	29.295	25.3447	25.2553	24.4334	19.1287	34.9513	25.0611	23.9296	27.2036	20.0102	36.1991	19.7751	16.351	21.0426
MTFMT	49.9285	61.6142	62.4954	33.437	15.7334	33.5539	4.94859	6.13557	16.7541	15.2222	15.842	13.0209	7.79768	6.8437	8.10572	6.26202	5.01078	3.99171	4.06136	4.84411	11.626	6.09909	5.62977	8.95439	14.6136	15.4944	11.9631	17.3653	13.2222
mrps24	49.8043	71.4855	74.6424	37.1473	57.6899	57.3023	22.2209	14.7519	54.7791	53.3043	47.5329	28.9729	27.1163	26.2791	82.0233	70.6056	83.8081	64.1957	75.9196	72.3837	100.592	87.5107	78.5785	57.0174	48.8023	59.6851	55.1647	75.8101	83.8062
tomm6	49.7612	63.8955	46.6667	79.5075	79.2836	75.6119	13.9602	19.5672	27.0647	34.0398	38.1517	34.3383	23.8284	24.8831	55.5746	60.6617	70.7363	32.5025	45.0746	42.3408	51.8134	68.6567	61.9353	66.7836	65.2114	74.5821	95.6617	81.5846	97.7612
DLK2	49.7323	50.3397	55.4546	101.844	97.578	129.983	26.2133	27.3737	38.0096	32.4899	48.0056	28.1696	27.1003	26.1519	0	0.467834	0.698031	0.62407	0.697593	0.073085	1.19081	0.903282	1.30066	2.45339	1.80263	4.60744	6.00919	9.66346	6.42757
rab11ba	49.6833	51.83	56.32	51.9956	36.2189	43.4556	12.4044	7.93778	14.0544	19.0911	23.69	13.78	13.9622	11.3733	22.5567	19.9078	25.4578	12.9533	17.3233	13.5389	31.8378	24.2589	15.53	18.9156	19.5233	35.7333	18.8444	17.0011	19.6267
gpx4a1	49.5016	64.9334	46.8008	61.5644	47.7041	65.4039	27.1883	17.2724	24.4503	24.7576	24.9187	22.536	21.0049	21.1403	95.5126	51.3259	104.86	62.8783	60.3483	67.0131	79.2233	98.8854	85.0415	245.234	206.412	345.052	236.472	232.056	221.211
mapre1a	49.3729	54.4091	55.9408	43.2604	42.9101	33.9575	16.7695	17.5474	22.8451	28.4419	24.0512	19.9533	23.9735	18.821	11.2476	9.56268	11.078	10.7994	12.0992	9.68176	28.0411	15.1045	11.5787	39.9248	37.7528	47.1533	57.078	56.5905	62.5637
ARL4A	49.2703	33.1559	65.8474	1323.33	1186.45	1614.28	29.2869	28.728	62.3897	52.4959	49.2007	20.7081	23.1244	17.4577	7.34494	7.06136	9.73963	6.80597	4.75456	5.66833	8.60033	7.69983	5.26368	57.6219	64.2952	113.374	11.0265	16.5423	20.5804
SNORA73	49.2467	53.8089	50.1156	83.1289	77.9869	88.2633	195.372	306.566	281.846	271.261	263.184	215.302	292.733	237.018	0	1.14667	1	1.32987	1.52889	0.604444	3.15556	0.266667	0.222222	0	3.16444	0	0	0	0
lysmd3	49.1513	53.7823	41.5314	85.4081	109.308	112.352	11.972	13.5122	27.724	28.3528	37.8797	20.721	17.5085	13.3137	6.97565	4.50185	5.95646	3.76531	6.50037	2.3845	7.06863	5.35498	4.11808	72.1446	73.0089	85.9041	20.352	17.0834	18.4391
CREM	49.0671	43.3104	67.3775	96.9758	113.489	151.687	11.0398	9.75671	17.574	19.8303	20.1775	10.7844	10.7437	7.58701	29.7485	35.6892	32.884	13.5775	16.9368	13.0035	13.0225	5.68312	7.85714	31.4173	29.4169	50.7156	13.2061	8.99048	13.0303
rab20	49.0542	40.9476	60.2587	32.222	20.799	27.1844	16.2622	20.8864	36.0603	37.1101	47.7264	18.5455	18.8112	16.0559	0.168706	0.541084	0.776224	0.826923	1.27972	1.95367	2.10577	3.0035	3.00175	43.1337	42.4886	43.3392	22.1678	21.6713	20.5927
mmp28	48.9855	70.0479	74.2032	32.1712	20.3241	41.5862	31.6641	24.0472	54.7491	61.283	61.4795	33.5842	26.4029	26.7991	0.371705	0	1.80702	0.70614	0.772361	0.646617	0.303258	0.892231	0.688053	22.815	17.6082	26.219	28.059	27.951	32.7163
zbtb20	48.962	66.4711	63.6402	51.3382	51.0123	71.2279	13.9446	13.7775	19.3985	30.2711	25.1172	10.0485	12.1917	9.95931	1.92328	3.01765	3.47794	1.4098	3.38529	3.13677	3.92304	1.5799	2.825	6.39853	5.32647	5.63088	4.26078	3.97304	5.49265
rab4a	48.8912	70.6088	47.0219	52.847	25.1493	58.1186	18.2423	13.9851	16.0433	22.0856	23.354	14.8056	14.9409	10.6177	11.1851	8.91907	11.4088	8.31488	9.79721	5.54326	11.6028	9.74651	6.33767	32.8493	26.4642	48.06	39.0679	37.9735	38.0865
nfil3-6	48.8843	43.3342	50.0728	111.666	68.2828	150.985	13.5458	7.02314	23.9186	23.6915	21.4867	9.91431	12.527	9.13282	19.5476	12.4859	22.4627	12.7952	12.6555	12.4122	22.2091	16.8706	12.0694	31.8338	31.8543	41.8997	31.1838	29.0338	33.6924
nosip	48.8752	58.7959	50.9554	75.3366	86.9494	102.132	19.1063	16.4554	23.4481	28.1612	35.1209	18.6021	24.3482	16.5918	22.4648	21.4524	26.8328	20.982	22.7766	21.3924	27.0214	24.3568	21.1797	39.9366	51.7281	62.0802	48.6531	43.2436	43.0493
mrpl36	48.8571	35.1005	41.8915	41.3492	33.5582	54.3122	23.963	24.4444	44.0847	43.3757	49.9259	35.1534	22.8228	16.1667	50.4127	38.0291	58.2487	41.6984	69.455	45.4656	65.1825	48.1799	53.3651	50.3995	35.2063	61.082	58.1587	45.2143	47.8122
cldn12	48.8029	45.2349	37.0543	56.8835	51.8078	61.887	12.7358	11.3861	21.3888	29.5996	29.6988	11.7011	10.8381	13.6005	6.35676	6.25089	6.99911	3.99911	4.56673	5.00267	6.5516	7.21575	6.25801	30.2411	29.0916	33.6495	15.7473	14.3132	22.8399
nocta	48.6405	35.9769	47.449	199.181	236.261	323.257	17.2344	11.3688	20.5505	22.4462	33.809	16.5977	16.9693	11.1926	7.50329	5.9753	13.9374	6.09221	4.42261	5.1427	2.25302	5.25302	4.18441	21.5637	21.0187	34.9281	17.6383	21.1992	16.6339
taf13	48.64	48.1253	42.16	54.6453	37.16	52.928	5.47467	16.1653	18.208	22.768	23.136	20.1733	15.24	9.11467	30.6853	29.3893	35.6587	25.776	25.9787	29.248	43.656	40.08	34.5893	32.368	37.168	61.0427	34.744	31.08	40.6533
bod1	48.6302	36.2004	36.4724	49.4569	39.9516	49.0029	13.6544	15.8548	23.486	21.5015	30.1075	21.9816	18.5363	19.6893	14.5934	13.4366	19.8132	13.4656	16.2323	18.3011	17.2507	19.7425	14.9521	34.3785	33.5726	59.5189	28.5402	23.0029	32.9564
chmp1a	48.5697	54.8573	52.906	63.3027	61.7453	68.6438	11.8036	10.7264	23.9093	27.1086	28.1533	16.3945	16.0073	14.6964	14.69	8.18075	10.6267	13.5618	10.0196	7.92837	21.5498	12.3276	8.41075	37.0115	32.5266	41.3797	31.9768	29.2907	30.7073
arf1	48.5387	75.0132	38.7551	32.087	66.0782	70.6228	7.78801	7.92836	12.5921	22.443	24.0102	14.2727	11.0117	9.84649	22.7018	18.6564	16.8626	18.6418	13.97	17.5066	26.7493	20.4605	18.8772	41.8173	32.2368	33.2105	19.0431	19.4181	21.617
klf11a	48.4777	64.5023	70.5508	20.5832	24.5709	47.4608	6.88026	8.57411	22.257	15.9133	19.3528	9.3521	11.1858	10.0693	87.2172	122.31	133.214	72.499	126.545	79.6233	119.769	96.0388	101.259	23.543	25.6162	33.7372	26.2304	25.2343	22.1385
MID1IP1	48.4557	128.285	39.2278	38.7405	100.361	47.8418	25.0211	19.481	47.6835	56.0485	57.1266	51.211	39.7637	35.23	10.0021	15.6899	28.654	14.0633	14.5886	11.1203	18.7975	14.27	11.9747	18.3692	21.2131	22.1688	87.2658	88.3492	76.6181
nr1d4b	48.3981	43.5209	51.6638	45.6662	33.9715	83.823	12.5487	11.3491	24.7608	18.9047	19.114	14.4697	10.2789	9.55111	33.0998	18.436	36.3592	39.6992	38.888	38.5598	29.049	31.0939	24.5939	12.6565	8.83484	14.8136	4.67003	5.38004	5.40647
rbks	48.3107	59.0315	52.2352	61.3407	59.9657	69.9552	21.7236	16.4399	46.1329	38.2848	46.9689	19.1118	15.7073	18.7869	4.50897	1.89979	3.43407	2.16983	5.60285	3.69726	6.36709	2.08861	4.72257	50.866	54.5522	69.3669	52.2321	48.3718	49.557
ARHGDIA	48.2864	56.1646	62.6653	69.014	41.2143	71.3403	13.9328	22.0812	19.1331	23.2591	27.0196	21.951	17.6436	26.7447	21.4741	18.4951	25.5238	14.7094	17.5924	16.5315	36.1499	21.9083	19.215	51.4237	65.0196	62.5098	81.5392	62.0203	64.0931
fam174b	48.2426	39.1471	18.2377	71.4853	75.1569	125.426	7.02451	10.5539	11.2255	12.9167	8.98284	5.5	5.38971	4.06128	8.69363	6.33824	7.30882	1.93382	3.03676	4.64216	7.47304	8.67647	4.59069	24.9632	22.1103	21.5331	2.85784	7.04657	3.93628
macroh2a2	48.0304	58.5973	71.9476	92.9987	45.6959	80.647	17.5955	19.8345	33.7086	38.9657	40.9982	23.684	31.9344	16.6479	38.3596	36.3913	41.4595	32.2927	37.9789	33.7183	59.9692	47.5392	36.8508	78.8459	79.2007	109.967	63.989	57.1778	62.5779
tra2a	47.9293	70.2975	54.9438	83.3411	62.5523	82.6662	15.5359	19.719	32.1599	32.2108	37.7689	10.1676	26.1948	18.8798	30.1536	32.5155	33.3789	35.4268	37.0174	33.2849	53.0131	45.6395	39.7817	41.4574	46.7316	69.3062	33.6521	28.6376	32.126
znrf2a	47.9074	27.3284	37.4574	34.6414	14.5043	49.904	10.2618	10.9876	30.0178	21.4655	29.3141	11.4578	13.694	13.8083	13.8637	12.7413	12.8389	12.024	16.5866	14.2138	13.5364	18.3563	9.70953	49.842	47.0894	67.0492	27.1166	32.8056	24.6836
cotl1	47.8508	50.7809	61.5245	32.0583	15.8415	12.7995	8.8345	4.1958	10.1981	6.88345	6.669	8.96504	6.94406	6.2634	20.7879	10.9709	25.289	17.3986	16.359	22.1166	55.141	15.2436	18.4709	14.0653	12.4918	20.7809	13.6434	15.8974	10.5921
rbm12bb	47.745	56.9207	57.095	66.4495	65.1147	64.613	13.3055	12.8055	27.5707	26.1413	29.9783	13.8863	15.933	11.5111	17.7587	14.5766	19.3516	12.5135	14.9129	14.1196	21.515	18.7376	15.0364	29.2654	28.0177	41.0359	13.2757	11.5086	14.4318
mrrf	47.7014	82.2637	73.6515	53.1538	37.2902	38.8577	31.149	27.7077	35.9866	39.5832	33.5478	21.7863	30.4653	26.2264	35.0802	37.0192	36.0236	27.3703	29.2681	29.289	35.333	46.6786	36.367	29.0165	37.0538	44.5879	34.8011	22.7802	31.5912
slc35g1	47.6476	56.4063	38.8984	46.481	36.0437	44.6056	15.073	10.4714	33.281	45.5516	44.3921	14.4444	19.1508	15.5992	0	0	0	0	0.346825	0	0	0	0.549206	47.4968	48.5325	54.0135	17.7405	17.1563	13.8937
tnfaip8l1	47.6134	44.6573	42.239	24.007	15.5764	18.29	11.6872	12.3234	13.109	13.6889	17.8998	8.05448	9.64323	11.3146	2.67487	3.70826	4.18981	2.24956	2.62566	2.77329	3.29877	8.54657	3.78735	20.9156	11.8014	25.4482	24.6485	17.0439	23.42
pter	47.5927	74.4825	86.1909	30.8905	18.8666	54.4849	14.4758	13.754	18.6237	17.8199	14.8938	18.0575	16.5632	13.1929	16.9052	18.4435	17.5605	10.0679	15.7157	12.9476	26.1478	28.3508	19.4046	30.578	32.6593	49.416	76.2009	72.6633	67.752
srsf7a	47.5772	61.7248	89.8758	61.3175	58.6359	60.3063	32.7808	33.3227	58.5125	63.7489	77.8792	44.0362	44.3054	35.6652	25.2735	21.4694	30.0457	18.5099	26.6186	19.3823	35.6385	25.7413	20.7259	14.4694	19.9694	27.5315	16.5962	14.0906	12.085
ndufb8	47.4275	36.2301	5.51103	42.5105	48.1927	43.7724	16.6831	18.1787	31.8706	40.1669	26.0169	10.5816	29.4022	22.5162	49.0485	50.6272	79.2923	51.264	77.0022	33.9853	60.3544	90.7661	77.1569	80.5482	71.4033	116.747	141.919	65.3515	68.0621
ppm1bb	47.3944	5.70226	24.9788	29.7373	14.767	55.8858	20.4608	0.846969	3.36686	15.7189	17.6736	18.6818	11.9836	10.0075	2.03023	25.4412	12.6827	10.529	23.5778	27.7257	3.53619	2.16922	14.8711	15.0792	1.26734	53.245	29.7573	19.0402	21.6193
mych	47.3603	57.1187	65.3749	23.6328	15.6002	43.5555	21.7859	25.5821	52.5193	45.7696	61.9699	56.7842	37.129	35.5013	13.3285	9.9871	14.5976	32.6715	20.5709	28.4394	14.0765	10.1702	8.85383	17.6518	16.5572	21.2511	7.78676	9.64488	3.73431
glrx5	47.3036	46.9272	47.9578	50.1572	68.3376	50.6467	11.8945	12.2845	16.58	15.0933	21.1191	13.8747	11.8257	11.9857	39.3172	32.7556	41.4466	24.4329	36.0238	28.6338	35.2206	34.5541	31.885	34.2777	25.9871	45.0075	33.4057	38.1634	26.533
tmem127	47.2347	60.8417	55.6556	45.7014	45.3431	54.5181	18.0167	14.0208	37.4236	39.6347	48.0486	16.1583	25.4903	16.4292	11.5694	13.5694	19.9569	22.7792	13.9042	14.8167	25.0264	17.8625	12.2569	29.425	35.9042	46.1028	30.8458	27.8222	25.2681
snx3	47.2188	81.3269	38.8476	50.65	23.3472	67.193	10.1187	14.4548	30.2188	33.1237	33.9423	20.3084	26.2392	17.4709	18.8901	19.976	25.566	14.1967	24.1625	17.1283	20.7604	21.3555	13.7175	26.7742	36.5716	39.2424	35.1108	31.368	31.3038
eny2	47.2188	53.1528	59.5694	22.941	29.809	30.6632	28.2083	23.8333	16.8021	21.6267	34.2917	28.8924	28.6528	21.1146	91.6389	88.158	105.396	84.4566	66.4861	75.0122	78.2118	112.747	85.1979	64.184	78.8507	102.17	87.0243	110.622	122.233
MED21	47.0982	71.2374	35.758	88.1895	54.3356	61.2283	10.5434	12.4498	25.4452	16.7694	14.7215	8.51598	13.2135	5.0274	15.1027	13.5228	19.2055	19.8813	25.2557	16.6804	25.8219	18.6986	20.9566	20.8447	24.1781	34.9372	15.6142	10.4612	16.5776
SYAP1	47.0213	59.2552	39.4439	58.0577	65.208	66.8536	14.7128	13.9069	22.7208	29.119	29.5971	20.2093	27.0669	15.1057	53.6265	35.9944	58.2906	37.3824	51.2399	46.8452	61.0938	43.4516	31.1786	97.6689	109.232	142.326	70.9942	63.0524	76.5774
isca2	46.8496	49.3299	40.1524	131.18	169.309	144.817	24.2478	17.5919	45.8299	48.3333	48.0639	21.7237	20.6794	17.4543	47.617	33.1804	55.8938	38.9862	39.4671	37.9258	46.0143	49.2542	41.0521	111.417	109.244	145.401	43.4494	46.4661	32.0344
mrpl30	46.7932	41.0753	55.1278	54.2864	46.8642	54.9506	11.45	15.9938	25.5914	25.1926	29.6827	15.0321	28.5448	22.2019	26.6012	25.8932	41.4414	21.929	31.6284	19.9465	34.1136	27.7691	28.7105	40.9654	36.3278	74.066	38.4679	28.4191	42.2895
nbr1a	46.7914	42.7683	43.9154	91.4833	98.6011	148.613	11.1728	10.9864	28.7492	29.9127	30.7416	15.6413	16.685	11.3972	19.1524	18.3327	24.226	16.3809	19.8612	19.5346	23.3865	21.166	16.9843	38.3849	34.8125	52.5086	18.2988	13.2536	16.1418
abhd10b	46.7868	57.6667	58.308	59.9046	40	31.6425	16.919	15.1874	29.6397	28.7333	38.3287	17.0425	19.2483	14.7345	13.2908	15.3966	18.1241	11.3322	13.6494	11.6448	20.6966	17.6649	10.8471	14.5287	18.6793	17.3925	12.9701	16.7828	17.0305
lsm3	46.7756	45.9479	44.5697	45.7176	44.9034	38.6681	20.9176	23.6319	28.2613	40.3244	62.2874	34.3546	30.5008	31.2387	51.7832	46.679	58.4714	60.626	52.4992	54.3731	82.0933	81.0992	72.2773	65.8706	63.2882	103.097	110.334	98.379	126.411
junbb	46.6157	36.1865	28.1641	46.843	32.581	111.112	16.9531	12.9918	34.7859	35.2762	47.2039	25.8573	21.9103	16.4801	14.8216	10.1519	16.2232	4.44343	10.8017	7.50765	14.633	14.237	6.75026	85.1967	70.7054	96.3272	9.72681	9.08308	12.9327
ywhah	46.4874	46.1744	83.0848	40.1033	30.4694	39.5648	13.4236	13.1075	24.6349	39.2297	30.3978	21.5611	21.8029	18.6022	28.5627	28.8872	39.5682	23.5695	29.3446	27.833	36.5253	38.8235	32.6191	48.3952	47.1897	57.6512	40.0664	31.1338	32.5279
atp1b1a	46.4136	73.863	71.3661	55.9222	57.9206	65.4311	21.0888	19.798	24.3955	36.7276	50.1177	26.7926	21.9211	18.3961	10.6375	13.0213	21.0528	12.3097	17.2409	15.0746	21.4526	8.82996	9.35928	28.5458	25.3934	31.1471	23.3443	20.5885	13.6157
akap8l	46.3638	47.06	51.9549	37.6498	31.7918	34.1877	8.10145	9.29376	18.7604	17.1859	21.6036	9.38849	9.48231	9.07108	36.2863	17.9534	41.197	21.3773	22.2341	30.4422	24.5167	23.3193	24.5397	11.5523	16.0624	14.3569	24.934	27.2764	24.7837
afmid	46.33	76.3019	68.3774	103.641	8.18135	97.0804	27.7876	12.9415	43.1453	59.3417	66.0144	35.0782	23.1062	24.1066	6.00515	5.44859	4.4652	4.40471	9.83446	5.04633	9.86893	9.54142	11.178	40.5033	43.9852	53.5802	45.5192	31.892	31.2998
steep1	46.3052	34.0215	29.6904	52.2119	72.1148	50.3304	10.1985	11.8859	11.9289	22.6681	16.7237	18.6859	15.7933	12.4667	28.6607	25.2681	38.3259	24.1689	24.8985	25.72	36.4104	29.0511	23.9289	37.037	48.597	64.5393	38.9304	35.2207	31.843
coro1b	46.1783	61.1209	46.4785	26.3194	26.0025	26.6203	12.9751	10.5562	42.6414	33.1348	46.982	10.8352	14.6263	13.4817	2.05745	1.66603	2.16035	1.58523	2.11048	2.1995	3.13289	2.78346	1.66351	15.8093	15.0909	15.1209	15.911	16.2759	10.4356
PCBD2	46.1312	60.8221	49.5586	36.9911	27.2416	59.7346	28.9553	30.994	53.497	37.4016	40.8032	30.2744	40.8668	33.1561	28.2664	30.4145	42.8946	31.0418	26.7893	28.7753	35.5875	39.4523	35.5845	56.8479	62.6198	87.6282	89.8638	113.132	101.779
cybrd1	46.0575	28.2655	20.7034	17.2276	13.8805	40.2276	6.34598	6.79885	15.531	7.62988	10.9971	5.61724	7.44483	5.68736	11.5264	13.2069	16.3046	10.3126	9.98966	8.96437	11.2414	17.8483	10.0632	3.81034	7.87126	6.08506	13.6356	10.9241	6.96782
LRRC58	46.0059	50.165	49.6518	34.5141	14.3764	28.9117	17.7516	14.3313	17.8186	21.3123	20.9068	19.8928	16.5052	15.6266	5.1306	4.09439	5.41822	6.89255	6.59083	5.65613	5.43574	7.13476	9.64411	12.8373	11.9745	12.3684	18.4366	19.7676	16.0825
foxj2	45.9729	60.3562	59.9007	60.3927	61.7706	97.8044	9.95288	10.6449	16.3141	17.6055	20.2895	11.6593	11.2461	9.17932	24.0845	19.4854	31.6165	21.3179	20.4069	20.5411	26.6167	29.5449	23.1627	22.2573	19.4233	27.1382	11.4237	8.21765	13.8179
fahd1	45.9627	59.5457	27.898	51.9315	21.7747	26.1626	10.8371	2.14771	13.1096	19.7818	15.1339	6.98321	8.06164	6.01522	3.86538	1.04016	3.57763	2.50228	2.41781	1.26941	3.6484	4.2245	1.64231	32.6844	29.742	40.083	50.2724	47.3644	51.1388
EPS8L3	45.9453	40.1718	54.4367	57.8683	49.1766	70.9661	7.38411	6.8168	14.8044	15.624	16.726	9.21255	8.92333	5.46812	0	0	0	0	0	0	0	0	0	31.0858	33.6903	48.0157	24.4036	27.6728	31.9122
FBXL5	45.9229	26.3044	31.3203	31.919	12.7627	10.4128	0.895001	2.15485	17.8952	15.2542	14.9431	0.896797	2.42662	1.09127	3.19885	0.491414	1.58167	1.16986	3.10511	0.577554	4.58854	2.68533	0.752461	45.6372	43.5332	60.9981	26.2034	26.5909	10.7861
aurkaip1	45.8888	60.5015	76.5804	53.2399	63.1437	58.2465	17.4885	18.9357	25.2876	38.058	38.4093	18.6203	26.6734	25.8177	29.4713	28.5375	43.6435	38.1977	33.1022	29.5264	38.982	45.4817	36.8233	55.7879	34.9862	50.0151	58.5134	65.5532	65.6381
lyplal1	45.8634	45.4003	45.2527	48.6434	44.3907	49.6639	16.2923	11.3251	23.3955	26.6919	29.3593	24.4372	33.1107	21.8566	11.028	12.4536	12.4426	7.32923	9.11749	6.8265	16.8067	14.543	8.15984	32.1885	42.5526	48.2473	34.7118	29.5383	34.6899
arl6ip4	45.7876	42.3985	55.8422	64.4463	50.9264	64.8088	13.0271	8.14467	17.2365	12.5948	14.4433	11.4399	14.2906	8.6819	35.1895	19.8866	24.736	18.1794	17.3173	20.9162	27.7902	33.3046	19.3333	37.9645	27.1591	39.6459	25.0169	33.8503	27.1768
grpel1	45.6863	64.0009	49.2449	70.8665	75.037	68.0608	22.9163	27.8819	32.8608	49.6291	43.5018	28.2048	28.4167	29.9339	49.7471	45.6414	67.7811	48.4595	59.0176	48.804	69.6167	67.1744	61.9423	69.8952	76.8656	121.266	92.1167	81.9141	85.5824
anxa3b	45.6518	0.819968	2.32438	3.54994	0.304306	42.4866	0	0	0.885642	0.568012	0.172732	0.364264	0	0.444455	0.028232	0.015952	0	0.066901	0	0	0	0.101777	0	0.061789	0.982688	0.027422	0	0.024666	0
tbcb	45.5948	67.2711	76.8421	503.221	591.82	782.678	13.3014	11.8357	12.514	23.0608	23.3724	16.8988	20.7953	16.3486	23.7168	22.0166	28.9622	19.4026	18.159	17.7927	25.1152	21.9264	15.1662	305.779	305.088	427.84	48.0442	44.4566	58.7591
prrc1	45.5888	58.9421	61.8909	116.238	105.195	118.338	14.9057	10.4761	37.2019	53.3604	46.4367	22.3198	13.4716	16.6879	18.9985	17.0593	18.5468	15.7483	16.4097	18.2557	24.175	19.1894	14.7509	61.8039	60.872	81.7071	19.8939	22.0022	17.8018
cd40	45.4098	13.3437	27.3012	23.4523	11.4339	19.4674	3.32295	2.60057	11.1511	7.80076	19.9471	5.13787	6.16997	4.60057	1.90746	1.96128	3.82908	1.78942	0.904627	1.97828	5.68555	2.78848	2.65911	28.2134	27.3541	44.3163	37.4065	39.9858	31.559
HLF	45.3786	58.9214	39.8103	72.8298	67.5931	89.0634	19.242	16.1893	15.5046	23.145	25.8118	19.9649	12.6718	9.76641	12.7595	16.3954	19.1679	14.3832	14.5542	12.6359	11.5267	9.50382	6.99084	16.929	12.4725	18.729	17.3561	20.1786	18.0695
reep1	45.3029	44.5711	31.329	42.6971	13.6634	33.1661	5.90445	7.46417	14.4365	12.2112	12.6667	8.38979	9.7177	10.5657	56.1178	46.4419	47.7698	42.6965	40.0418	30.1743	46.5527	64.6933	36.9593	7.78285	9.63409	9.30402	14.6004	12.1889	6.7519
mpeg1.1	45.2838	77.1194	72.7427	60.6651	9.51666	22.0843	13.6921	8.91035	17.0879	16.1754	17.4904	17.8714	23.3916	18.185	6.18108	3.21261	4.85719	4.16513	4.83168	5.07087	16.0772	7.46882	4.4107	6.34869	5.98512	6.53118	6.4713	5.30617	6.43196
eef1e1	45.2356	39.4821	48.004	97.6873	103.289	107.657	22.755	26.9462	34.8137	31.7012	48.9816	21.7814	26.4283	19.7849	26.2998	29.5667	33.256	28.3645	30.3182	27.5906	37.6121	33.2898	29.3043	43.748	40.1295	63.7331	23.6424	28.754	23.1897
DHRS13	45.1911	45.8593	52.7691	41.8935	30.2406	65.2492	19.4811	12.2497	42.7625	39.4587	41.8344	23.3547	23.5005	13.7156	6.31499	4.33792	4.97095	5.3002	6.49235	3.40163	7.14067	7.49847	5.82416	35.998	39.8619	45.657	38.6493	37.2426	37.3109
arl6ip5a	45.1576	46.8653	74.0686	33.4879	25.3952	31.8907	15.0051	13.3621	20.047	21.3342	25.9644	20.0699	14.5044	16.5057	16.9149	19.6086	22.2643	18.9771	16.9047	18.4956	28.0267	25.8399	18.5667	33.77	33.1144	51.5184	32.6912	35.5286	34.3189
ctdspl3	45.1479	50.5528	44.5096	72.2229	74.5283	66.3731	17.9021	18.1521	24.7821	25.9557	27.2156	12.8188	19.0359	12.7267	9.10474	7.15443	8.76835	7.05657	7.7867	7.99962	15.3872	8.58639	5.63226	34.8261	38.2913	45.4213	29.5618	27.6858	31.2057
calcoco1a	45.1106	47.2176	38.9225	58.09	35.2552	49.7677	19.1375	18.8358	48.2511	42.7219	56.2893	28.7173	24.4255	22.6035	27.1144	34.3368	44.9629	32.8691	39.257	34.1179	42.2285	32.4281	27.4888	30.6322	34.1912	32.2407	21.7916	24.3371	20.8673
si:ch211-18i17.2	45.1037	56.2701	56.0282	41.6137	54.6692	54.0662	5.96533	10.7386	22.2552	25.0411	25.4599	9.8232	8.06747	7.6912	6.65387	5.784	9.72907	5.89573	6.14187	5.15173	8.3848	5.8832	4.828	4.0984	3.79995	4.38389	7.33867	6.90261	9.62715
zgc:113208	45.0234	43.966	35.3056	17.6006	8.60226	18.7866	7.21261	9.75748	13.4378	15.2999	14.3234	13.5424	14.1221	11.228	17.6172	11.7284	19.4268	19.0408	11.3371	8.88278	18.3387	13.3824	6.7211	8.77769	5.56346	9.51091	14.8601	14.0348	14.9701
U2	44.9917	48.3333	35.1508	52.3545	75.3292	36.2492	306.422	589.623	141.738	95.045	139.358	744.093	779.849	608.738	0	0	0	0	0	0	0	0	0.299477	0	0	0.082722	0	0	0
chtopa	44.9861	54.9284	50.166	64.4742	56.1345	61.6871	5.39742	6.92938	15.8995	22.0557	24.7789	9.01031	7.93969	5.0134	30.9428	29.3742	29.8572	26.8608	24.751	30.8954	39.8979	36.4165	27.033	27.8954	29.85	41.8923	23.3351	19.3005	21.5737
tmem185	44.9325	32.2022	37.0365	44.5365	42.5511	43.0927	8.33139	10.6423	20.3161	29.681	26.8372	14.3555	9.88467	10.727	3.42044	3.95547	4.05183	3.39927	2.64818	3.12555	4.3	5.52336	2.36496	22.6679	19.8055	25.2672	22.1595	27.5015	24.7609
gpc5b	44.7795	59.2536	31.418	22.4989	14.1568	35.7083	3.44044	2.30601	8.33388	12.1169	10.976	3.06066	5.46339	3.00109	49.6519	54.6721	48.8844	48.8497	43.7598	42.6732	62.9434	61.0888	48.6639	0	0.415301	1.20546	4.75191	2.05628	2.1235
minpp1b	44.7615	50.1376	34.7188	32.4864	39.5869	64.7486	19.6494	23.8937	24.4846	35.0309	28.0496	20.3912	23.2152	17.7974	15.944	12.8987	14.1386	14.648	9.32615	13.2249	12.3197	15.5955	10.1986	18.0255	20.6874	30.1401	20.7522	23.1049	20.0869
DDA1	44.7546	40.4429	41.7927	50.481	33.2087	85.4062	13.9859	11.5825	18.5346	11.4133	14.567	11.1961	13.2779	12.6601	15.9929	6.92807	14.3822	11.3054	11.0176	14.6798	15.4429	15.4118	10.9281	33.6142	30.1551	41.2793	19.7278	23.8921	23.6305
c17h1orf50	44.7415	69.1405	76.5349	69.8414	58.4407	78.3578	16.3675	15.3609	22.862	25.4438	22.8509	15.2129	11.5661	14.8341	20.2158	11.703	17.9104	15.0389	13.4714	11.3796	24.8325	18.9405	15.6667	41.1093	44.4577	60.1721	48.5358	54.5466	49.5518
chtopa	44.6963	58.6583	52.5938	63.4746	64.5406	90.5968	11.3113	9.77221	22.2908	21.691	39.9719	11.2005	14.53	9.62415	51.0904	44.6006	58.2703	52.7639	63.9408	44.6325	68.074	54.6241	48.7084	31.8937	34.5892	44.2103	30.2058	20.8869	30.1891
cryl1	44.6962	66.5316	64.8565	36.2034	11.9124	22.4631	23.0791	20.2352	32.0438	29.865	35.6234	25.6793	26.2368	21.5891	17.5137	9.94304	20.606	13.1466	17.3571	16.4135	20.2785	18.337	22.9362	50.2178	43.298	68.1783	103.773	85.6962	88.4805
chmp5b	44.5877	44.5931	42.8809	107.912	131.421	152.456	19.2039	19.1728	21.8754	27.1166	31.1539	22.836	24.565	25.607	53.0231	39.518	50.3624	41.841	48.0826	44.6535	79.2211	56.112	38.844	186.273	204.307	284.857	77.8851	70.4669	95.7332
pfdn1	44.5874	54.4399	34.8169	55.1421	38.9385	37.0751	8.65847	16.8429	30.8005	24.0137	24.7486	23.7281	31.1475	19.5779	123.214	102.406	127.299	112.243	111.347	106.088	130.676	142.943	111.85	68.026	79.8197	112.68	152.026	151.111	155.301
st6gal2a	44.5168	66.1967	53.2828	27.89	6.95012	19.9804	11.8959	11.1206	28.2854	25.6007	34.3186	16.7541	16.2805	10.1406	0.900873	0.456983	1.66178	0.774002	1.17986	1.6462	2.11534	0.754988	0.861908	4.78678	5.7101	7.58603	6.05923	7.91178	8.69295
pdgfrl	44.4946	80.5257	69.4081	40.0041	30.1988	66.5089	17.5508	18.0336	30.8133	32.6948	30.2197	16.4138	18.5524	19.4551	80.0598	79.4169	131.192	90.6151	119.623	109.492	113.152	144.724	101.027	24.6199	28.5605	38.7026	33.4825	35.2265	36.5854
tmem127	44.4681	34.6667	39.1514	60.9917	47.8264	62.0208	25.7389	21.6	38.2125	46.5514	60.2611	24.2847	25.8847	25.3	20.1694	11.9208	17.6278	19.2431	16.7333	14.7264	20.7278	15.8014	13.4097	43.4792	32.8083	53.7667	25.0556	30.0069	24.6931
nr2f5	44.367	39.6917	44.5591	32.3263	9.64045	29.5982	24.0113	20.7582	40.8478	41.2228	49.8022	31.5857	24.2574	28.6311	4.19171	3.90258	3.93466	4.93545	2.86581	4.13106	4.16432	4.39789	4.56886	22.8294	18.813	30.063	26.7919	30.7414	25.8764
slc3a2b	44.2701	49.2538	38.2091	205.993	159.639	180.482	20.1714	15.843	58.6227	71.5191	84.6449	30.0876	27.5086	26.5631	47.3621	50.4944	60.0932	35.9434	48.3104	34.2669	26.4313	33.8209	26.9148	110.806	116.313	156.314	24.306	26.966	22.5305
tex264a	44.1974	44.1823	31.9727	66.9953	24.7707	44.1184	8.58083	7.82331	11.4314	16.4135	16.6767	10.5489	7.35996	7.47556	2.7312	1.4032	2.15789	1.02538	1.94737	1.82801	1.61466	2.75	2.24154	8.87312	12.3327	12.9671	9.61936	10.4145	6.8515
BAMBI	44.1925	32.3341	46.0011	53.6297	39.8177	72.7826	15.6965	9.09286	7.77463	14.4247	17.7395	6.22197	7.453	5.38505	2.1812	0.738392	1.21857	0.989807	1.99094	1.64439	4.5402	1.74405	1.6795	19.0034	23.4405	31.5685	14.7554	17.9683	20.2299
mrps18b	44.1593	54.3041	45.8044	57.54	62.0542	57.3963	19.2156	15.0868	20.681	29.1224	21.1892	17.9017	21.5508	15.4702	27.0803	21.32	25.5068	13.8227	19.1583	15.2953	28.0976	21.5227	15.2664	55.121	45.5637	77.56	71.8912	72.6963	68.7142
cdh5	44.1134	60.3131	49.2849	44.8292	47.3442	50.2112	10.9045	10.9439	13.6329	16.8012	21.3169	11.3265	9.2098	6.50078	26.1151	25.5255	37.792	18.7549	26.4663	24.9608	26.5143	32.191	20.0851	21.3643	19.3225	23.7431	12.4847	18.4714	15.5565
nap1l4a	44.043	51.6389	71.4874	64.7589	71.4452	79.9926	19.0844	14.1319	29.6281	40.7556	32.4026	22.3967	20.7856	20.2719	47.873	41.093	54.9789	43.3033	38.9119	39.3826	51.1974	53.7541	39.0144	40.0815	24.0319	40.041	26.2304	29.0674	24.4037
sdsl	44.029	100.284	83.2319	63.4997	20.2684	73.8236	10.9464	13.4291	24.6572	24.1352	24.5129	21.1109	23.8762	21.9074	0.267801	0.351607	0.597354	0.151859	1.11783	0	0.339004	1.35035	0.793951	18.8815	21.6994	21.3387	62.2098	58.9871	66.9546
msrb1a	43.8264	47.1943	29.4547	56.0868	78.466	50.9528	32.9547	34.9038	26.5321	25.7925	28.7585	20.6453	43.3887	37.0019	25.1467	23.6604	27.9717	30.8692	20.117	25.2679	32.8774	33.3755	28.3189	276.953	249.238	365.996	310.653	318.336	300.291
gde1	43.791	26.83	24.6374	21.3688	13.652	35.6836	7.43413	6.31662	17.0185	22.8248	19.6367	14.3359	22.1104	9.87335	4.59068	7.1925	10.2026	5.04711	5.17832	6.53546	10.9564	5.29892	5.20669	24.4569	26.0301	43.6809	29.9724	31.0572	31.4769
dhrs13b.1	43.79	59.9026	34.7676	51.4728	24.5384	59.2741	7.75815	8.39754	11.6557	12.4294	12.6857	9.88269	15.6962	8.69479	5.02027	3.4895	4.03114	3.92723	1.72846	3.06589	6.54308	5.28385	2.69225	18.223	21.7962	28.2205	18.1332	16.9062	17.8309
SCARNA13	43.784	23.1777	32.5749	36.9059	38.1568	37.8571	49.6063	63.3345	15.7456	17.7247	26.2265	59.0383	89.115	58.6167	0	0	0	0	0	0	0	0	0	0	0	0	0	0	0
egr1	43.7758	19.7597	15.767	24.7037	9.38003	44.7608	1.21068	3.30432	8.52524	11.8928	20.4071	26.9495	17.3164	19.6094	10.436	7.3654	6.69532	5.71434	5.01573	5.14338	7.82334	7.54645	5.11814	5.61704	6.89064	7.1485	3.28968	1.7286	1.95355
tex261	43.4778	43.0564	44.9681	46.5518	38.9764	51.0846	18.8876	12.8233	31.9218	33.1301	37.1561	24.4091	22.7586	23.0065	2.63737	2.51896	2.53192	3.16582	3.78677	3.49491	4.22988	3.67946	3.67669	37.9695	39.3256	59.256	39.1883	41.6406	38.5055
pithd1	43.3673	39.8654	46.0351	122.397	289.326	318.441	18.9724	13.2324	32.0902	21.3356	19.7508	7.69613	21.6712	14.7926	52.1626	39.3357	51.5781	39.6292	31.1318	41.7267	43.7198	45.9829	46.1751	59.0781	60.4353	81.5404	25.4315	18.9722	19.4444
tnfrsfa	43.3292	66.3861	75.1983	127.27	79.2457	133.508	19.4968	11.1879	26.1919	26.0439	29.6156	12.1772	10.7072	9.17717	9.98555	9.09827	9.89798	4.94682	5.77775	5.74017	6.33873	8.24711	3.31503	9.14653	17.4925	19.1983	10.4873	15.4153	11.4613
U2	43.2566	44.4929	36.2861	51.4731	72.8369	36.5131	290.369	575.471	136.258	98.0209	121.368	699.17	772.121	575.065	0	0	0	0	0	0	0	0	0.299406	0	0	0.082702	0	0	0
TMEM33	43.2481	35.2015	48.2377	57.9651	54.4425	105.778	17.9871	13.5194	17.5523	21.2842	28.9625	12.5814	16.0388	8.60594	16.0937	15.0336	10.2655	11.3424	11.2972	10.7067	18.6499	14.0982	7.08915	40.1673	31.1531	48.98	23.9522	24.6318	31.4845
tmem183a	43.2247	64.6954	61.366	47.5586	42.4865	50.1374	12.6532	10.2095	17.8544	21.7297	16.8407	21.8001	15.5983	13.0563	5.47297	3.81363	3.35248	4.13908	3.14471	3.58502	5.31363	5.49268	3.69426	46.25	53.1928	62.433	68.549	55.8345	48.4769
kcnk6	43.2015	49.7832	38.1322	43.0928	14.7158	37.1952	14.7247	14.4406	25.1132	24.9612	29.0947	19.6688	15.8976	13.0744	2.3007	2.28608	5.20534	4.18118	3.67387	2.42848	5.85187	5.13668	2.59186	22.6065	18.9669	29.7826	16.4081	20.2092	17.5645
rnaset2	43.1921	63.7473	39.4376	74.3752	49.429	43.1763	34.8476	28.0976	49.2694	47.6474	47.7132	32.1148	33.5009	26.9091	25.6673	17.7364	31.4448	23.547	23.8061	27.8363	31.3987	27.3267	28.9182	35.2107	34.4905	42.9815	49.326	33.3992	41.1835
themis	43.1758	0	10.9949	23.6857	0	56.7348	0.382412	0	0	0.525513	0	0.447497	0	0	0	0.02926	0	0.081069	0	0	0.519924	0	0	0	0	0	0	0	0
CEBPZOS	43.1143	47.7101	62.9244	57.7322	40.0154	65.8583	12.5328	11.6387	16.3294	18.1261	16.9753	19.1126	15.4162	13.6655	22.4507	16.8636	20.2085	13.1605	16.6482	15.3546	18.7838	18.491	24.0106	24.2185	30.6454	34.5787	50.9997	56.0838	55.756
plpp3	43.0871	45.816	45.488	35.7111	30.5031	54.2956	9.07911	9.98844	14.3022	16.36	19.32	7.688	12.4564	9.67333	25.4662	27.72	36.0436	19.4742	20.0778	19.0204	16.7089	26.668	16.4471	8.352	9.20444	19.1302	12.7711	14.1618	11.6942
psenen	43.0655	57.4024	54.2163	57.7117	55.8952	73.1599	17.4351	17.0734	20.5491	23.6756	34.962	25.7824	28.5727	19.8113	53.964	51.9423	71.7497	45.7837	50.0216	52.1029	77.6848	62.2602	53.3643	106.451	140.997	173.141	115.051	120.21	125.895
upp1	42.9927	67.6988	52.9006	22.9964	26.6852	37.7482	5.13056	7.54735	11.2529	14.7222	18.2685	5.63163	8.17534	4.81686	18.1759	9.21852	11.3012	8.42508	6.12903	6.46306	15.5921	4.23621	5.67898	5.44745	8.282	6.96046	9.20864	8.79813	5.72529
ciao2b	42.9861	42.1576	35.8754	6.19062	3.93117	11.6195	3.42449	3.8695	13.1305	9.5176	14.379	8.09384	4.59091	8.03666	2.83578	2.89296	1.04546	1.32111	3.47214	0	2.97508	1.16129	2.60117	12.9501	17.4355	33.9157	23.3138	22.4714	27.8996
tcima	42.9314	48.2712	49.6503	638.186	377.32	447.951	37.4085	11.5131	104.405	67.7026	100.902	20.9248	31.2974	29.7941	20.1797	21.6797	28.2712	28.6699	35.8791	25.8007	40.8954	25.0817	19.3464	275.935	295.663	385.078	127.451	148.755	156.588
nfil3	42.8694	27.7641	43.6414	35.4949	25.6219	36.7367	14.3225	20.7215	41.5866	42.0519	40.6104	24.5527	22.3903	18.4069	26.2417	21.0462	18.4899	15.1154	22.4986	17.8781	26.9206	25.7287	21.5606	37.9747	38.8045	55.4365	19.6234	22.1991	20.3463
fbxo28	42.8158	28.8868	51.7826	37.8446	23.991	21.8711	15.3311	11.4434	25.9214	28.7574	27.7565	13.6496	8.1779	11.0045	10.9173	10.4447	13.6819	9.81851	9.6478	7.04852	14.7772	12.3944	7.19587	15.257	14.9299	17.9128	11.4331	17.2309	11.5049
H2AZ1	42.7783	63.9265	5.82435	24.0502	27.4711	17.5936	0	0.542509	2.51076	11.117	15.1591	1.15923	1.23833	2.04027	0	0	0	0.448577	0	0	0.638519	0	0	278.567	19.4065	13.601	0.640983	0.687256	0.67518
gltp	42.6978	62.8424	59.6702	27.1138	31.4615	32.5476	8.17017	5.93557	13.8228	13.7318	14.577	14.2619	12.1211	11.9048	2.59104	0.883053	2.15056	2.30952	0.619048	2.18487	6.56513	1.20168	1.28221	11.9244	12.1001	19.1898	25.3452	26.2682	23.7143
chpfa	42.668	47.2731	43.2757	88.5668	71.4743	93.5227	13.017	12.089	20.0144	27.5371	32.0318	10.5401	14.8704	12.9511	3.47469	4.3582	4.35777	2.24171	3.97077	3.13351	3.67714	4.59075	2.6911	18.5999	15.2496	23.1409	5.41187	5.76876	6.59511
lrp10	42.6005	60.8974	47.3401	56.6546	50.2168	63.6291	13.1634	12.081	21.7124	23.7229	25.0088	13.0276	14.7895	12.104	23.8212	19.3442	22.9844	17.5104	24.1249	22.3764	29.0513	24.5287	17.4563	24.6449	24.1737	28.3711	16.1721	17.1035	16.9448
dipk1aa	42.5938	49.0299	43.493	36.7699	12.328	26.6824	21.0668	19.0053	37.5596	47.1841	39.0861	26.1959	22.5163	22.6211	1.70311	2.73728	1.88762	2.09264	2.55657	1.70919	3.52392	3.76082	4.24222	13.8732	14.0361	21.374	27.7005	31.1078	33.4951
ILRUN	42.557	15.375	2.52795	4.10615	34.3403	10.5284	12.3255	10.0586	2.72315	2.16346	1.50725	13.667	18.7786	16.1304	30.9816	16.3458	25.3197	24.7129	16.7222	22.0997	2.80737	23.3446	17.237	15.1164	1.49051	20.014	20.1994	12.1319	17.1553
SSB	42.4195	61.4253	45.6918	37.6999	34.8708	37.3815	9.71553	10.7491	12.5747	14.3065	15.2787	11.8656	11.876	10.4959	10.7248	14.1437	13.3717	8.91049	9.86616	6.37109	13.4676	12.1903	7.46524	20.8459	21.3094	35.2778	41.6489	42.3137	37.5765
arrdc2	42.3772	36.0474	10.2807	13.3053	10.1886	49.2506	8.14631	10.0691	22.6801	16.3582	10.2515	11.5647	5.55751	2.60986	0.242716	150.962	0	0	0.180517	0.245475	1.68156	1.16174	0	19.8075	20.2679	26.0493	24.4216	17.5333	17.9577
WARS1	42.3642	53.5167	43.816	96.3059	221.505	95.0806	12.8372	19.5135	51.7837	42.0521	51.399	41.8042	24.0885	29.9382	43.5556	53.4785	50.5979	42.4722	71.491	48.184	59.7323	54.241	66.7378	31.5271	35.099	50.1469	25.5674	21.8889	21.326
paqr7a	42.3591	34.9751	31.7855	17.8739	12.4343	21.9626	6.47987	6.33078	14.4358	15.1544	11.0853	5.5465	4.83605	3.69319	0.801055	0.478907	0.391179	0.58629	0.138543	0.802493	1.13423	0.780441	0.103068	6.37584	4.98514	6.05992	5.52589	5.08006	6.08533
fam50a	42.3566	22.9238	14.6125	19.8936	51.3935	24.6945	6.15162	13.1379	17.1061	16.4335	10.684	5.07177	11.218	6.6611	20.8737	34.0868	20.2045	13.5148	30.1961	14.344	17.6615	16.3803	11.3621	14.4621	16.6279	25.5211	14.8519	15.5043	10.3541
ahr2	42.3236	53.445	45.6165	64.1272	64.3836	73.3865	10.6236	13.0701	23.4755	23.8945	29.5105	12.5619	11.726	10.7289	10.787	9.90886	15.3471	9.5893	9.68241	8	14.2133	14.4556	8.3572	14.1218	16.7412	17.8273	10.6694	13.1501	10.6176
erh	42.3164	22.9276	17.4424	11.9317	27.8925	51.5545	15.0574	19.5276	11.1986	1.99737	15.2884	16.6232	17.2619	15.3542	20.5078	14.5445	18.9398	14.8951	18.2113	16.5254	21.9296	26.4357	16.8478	10.3852	23.7147	18.3343	15.8692	15.6415	20.0325
creb3l3a	42.2231	50.5712	47.6855	69.822	63.2156	126.603	11.2635	9.98802	28.552	31.1383	24.8973	20.858	23.1345	21.0681	0	0	0.635181	0	1.70842	0	0.137577	1.01437	1.26078	21.5643	20.4151	26.8398	27.731	32.5103	30.4206
ttc3	42.2221	54.5064	49.6247	3.54454	2.70984	6.01169	1.28969	0.741272	1.79448	22.9195	26.9459	10.0072	3.00457	1.32878	2.29068	10.1811	11.5446	0.882212	0.369618	1.00973	1.10984	1.27193	1.53787	16.0076	17.4283	1.21145	1.00371	1.76521	0.494648
uqcc6	42.219	71.0381	45.9524	44.3357	61.8833	47.8524	16.0286	15.019	20.4667	24.719	29.7238	24.4667	18.8119	16.9238	122.648	78.4809	116.245	94.0333	76.6714	98.95	121.01	170.598	88.7524	33.8	28.881	40.9143	36.2857	54.1143	45.9262
lrrc58b	42.2189	38.9741	32.9572	108.66	149.701	210.303	14.2472	14.4859	43.0676	44.4847	44.9235	28.9004	25.5377	21.4388	6.39313	3.30038	6.70386	3.68926	7.29708	3.6742	8.54897	6.22505	6.05697	25.3343	27.5763	37.4313	21.8731	21.9986	17.2933
jmjd6	42.1972	49.3853	63.4579	58.8123	56.4304	57.3267	24.262	21.455	31.4171	34.9736	38.7574	15.8568	10.0012	10.2368	28.7603	32.1646	28.9241	22.7434	19.8601	20.7525	28.2261	26.7805	22.0743	13.1716	10.0751	13.8655	9.52145	10.1485	5.15429
ccdc47	42.1961	40.0477	47.5923	62.8123	81.394	78.5716	16.2986	20.7377	28.5168	35.1477	36.2561	22.1796	16.9618	16.1207	25.4772	24.1749	28.3778	18.7671	24.3582	18.9429	20.2916	28.1874	24.5209	55.4133	41.0297	57.0232	23.1198	28.4578	28.0812
dmac2l	42.1669	34.018	41.8723	43.0638	24.1309	36.761	27.0344	17.5499	38.9378	38.3781	41.8576	43.0115	33.9411	32.3241	45.4419	39.3372	48.8331	56.5696	61.8846	50.2717	68.8151	72.2275	53.356	77.8871	90.545	110.239	114.316	123.072	118.391
SLC35E1	42.0729	52.2417	33.3997	37.2836	33.2243	46.6719	6.58813	6.02618	17.2801	17.8752	22.2923	9.25654	6.92932	8.82373	6.83988	7.49913	7.06457	5.94503	3.43194	6.70419	8.16187	5.06108	6.7897	15.815	13.5694	24.1571	0.829843	6.52705	1.26353
memo1	42.0137	40.5041	46.3565	16.2328	18.4484	22.7757	9.1972	7.59481	13.7042	18.6499	19.0677	11.152	9.7888	11.7725	8.99621	11.0884	13.1952	8.08985	11.4294	9.40169	10.4023	7.92824	9.33868	12.9737	10.93	18.8716	11.224	8.10327	9.5493
SRSF10	41.9367	55.6805	70.0799	52.9687	35.4808	51.468	16.4378	20.3546	25.7619	24.3044	35.8342	16.3775	20.9141	20.8308	16.5162	14.3636	17.2543	11.1956	14.295	14.9028	24.9751	23.7374	14.6289	33.8063	37.6741	42.6206	41.9231	37.3523	41.5422
mydgf	41.9034	40.282	37.2965	35.0018	36.0607	40.4479	6.77788	7.69583	15.7443	14.0807	18.3427	9.95104	8.39891	7.78423	0.922937	0.417951	0.165911	1.41614	0.939257	1.23119	0.301904	1.43518	1.47779	21.8019	23.6319	33.437	15.8264	16.9075	16.0807
zbtb16a	41.8491	66.4044	51.1721	275.738	243.285	269.911	22.8125	23.062	46.4018	38.4528	54.4066	18.3137	25.572	23.9613	5.51956	4.95646	3.94133	4.89889	4.43579	3.79041	4.83284	5.84354	3.14797	4.03727	3.85387	2.91587	2.24649	3.13247	2.95535
tmem150b	41.842	0.245077	0.262259	0.229234	0.238882	0.119567	0.326164	0.453313	0.391999	42.7913	0.569994	2.02627	0.416025	0.423978	0.782973	0	0	0.02674	0	0.061017	4.54828	0.860219	0	0.217344	0.096065	0.15498	0.281999	0.252922	0.193147
GET1	41.8324	44.7154	49.7719	45.2222	46.3938	69.345	3.51657	3.49123	10.152	7.91423	7.79337	4.09357	5.94542	6.4191	9.18908	8.18714	12.0117	14.9006	16.9162	15.4464	16.0058	22.9016	10.0341	13.7973	11.3957	15.7817	20.4834	19.9327	27.8752
hccsb	41.6418	50.0265	43.9644	84.9953	80.1837	97.9188	15.6001	14.4869	23.8577	25.7898	29.6468	18.142	18.2285	15.3305	99.304	72.6232	95.5666	73.952	77.9958	68.0781	96.8213	110.277	81.0883	34.1588	36.793	55.1923	34.946	31.2568	39.6884
entpd8	41.6352	46.3394	50.8048	80.0289	59.1268	79.1151	15.9785	20.9038	24.2953	20.3157	25.2023	18.434	18.9695	18.7601	0	0	0	0	0.261178	0	0.367503	0.163577	0.446565	25.175	23.6118	37.8473	22.5423	25.7061	22.5485
eif3jb	41.5057	41.86	53.9154	144.14	236.206	235.474	8.11129	8.89342	16.8636	25.0522	27.2414	10.2299	13.2184	6.35005	44.5789	45.2032	38.7346	31.4943	27.1855	25.8088	40.2863	37.6651	23.4859	84.8046	92.6398	119.199	22.5622	33.3093	24.814
uck1	41.3724	57.8065	57.7473	54.8437	47.9457	55.8547	14.2149	22.3407	32.3077	33.4011	30.6526	25.0159	24.7167	23.2863	20.7582	18.9042	21.0232	13.3004	19.5049	19.5537	28.6001	25.1899	26.8199	48.4701	54.0153	79.6801	88.0855	82.9799	90.4493
slc30a1a	41.3425	58.2501	54.3143	61.6527	43.4319	70.0204	10.2741	10.8791	12.3907	13.2247	16.7444	12.2833	12.323	9.04457	1.92582	3.84219	4.01984	1.92796	3.22619	2.38248	5.92369	4.90598	3.26618	49.1252	47.1068	57.7967	36.8635	40.7607	36.4207
hbba2	41.2987	21.3934	61.2788	32.3069	62.1466	100.872	23.3814	38.7471	36.6974	28.1401	39.8657	27.2727	43.284	28.7129	8.27811	8.32817	19.9236	5.23184	21.3517	27.5699	38.7685	5.05012	14.4453	36.2555	32.9319	53.9104	34.7866	45.9055	32.9151
maip1	41.2741	54.9801	47.5353	76.0828	47.2516	64.7677	27.8049	20.4705	52.6547	49.889	62.5822	27.7227	41.5526	23.758	31.9833	35.2214	35.9538	26.6303	33.9679	38.8928	42.7728	41.3594	31.6213	23.5507	25.914	39.8524	34.9763	33.819	32.9711
slc30a1a	41.2623	64.5825	70.5819	19.8455	22.5805	31.7922	6.19264	6.79684	19.0796	14.8711	22.7607	13.6371	12.7574	11.2788	1.12557	0.486522	0.78501	0.289283	0.976989	0	0.580539	0.739645	0.213018	10.046	13.7403	13.3274	22.1729	22.334	21.6384
si:dkey-24l11.2	41.211	45.9643	48.8542	48.7225	31.7186	52.9782	11.6897	13.0721	22.7443	24.4061	21.5476	13.6942	13.6957	11.2503	8.57348	7.45348	8.81775	5.45663	9.16315	4.24674	13.7303	8.02112	5.6045	20.9885	22.9661	26.8942	19.8054	17.2378	15.2499
atp5mea	41.1937	70.1149	38.1171	51.1036	61.6261	37.7793	30.6667	31.5135	22.964	27.5653	27.2523	39.4054	45.027	31.9437	396.876	292.115	429.971	285.43	335.498	295.367	377.917	408.349	373.703	218.34	266.606	375.363	384.038	292.054	387.241
CNN3	41.1507	64.6304	72.0588	61.7905	43.3763	77.142	27.0548	26.059	25.6896	28.0808	28.3406	21.5954	24.0203	21.1973	26.8354	28.6403	36.0471	22.9891	30.9737	27.7685	18.9286	32.8101	23.1334	26.5374	32.7665	47.1443	24.8319	24.0466	18.3148
srprb	41.0953	24.0554	44.2011	115.952	105.429	123.127	7.82565	8.9589	20.5772	22.66	19.0006	11.7405	11.4844	11.7223	7.30542	7.7665	7.88232	6.59838	4.3406	5.38605	9.09465	4.61395	5.72291	35.8661	49.2786	61.9141	31.0056	37.0423	29.7768
eci1	41.0603	18.7877	0.150583	18.2795	1.44196	0.559928	0.525885	0.61418	12.1707	19.5053	17.4154	13.3387	7.7166	12.9945	36.1117	1.25171	2.053	0	39.5616	20.2426	34.5372	34.358	0.088982	0.681162	0.403374	0	0.381109	1.65734	25.3601
rab13	40.9592	73.13	45.9151	67.4167	39.9783	67.6433	3.3475	5.285	3.61667	12.7408	6.9025	5.1975	6.40833	4.81833	2.085	2.10417	0.646667	1.40417	1.44417	0	3.64	1.42167	0.9875	6.105	18.2733	16.1967	6.00167	10.9492	6.805
cav1	40.9435	42.5756	50.7614	65.2933	74.9472	77.7887	19.969	11.9636	17.1767	24.0874	21.6102	20.2732	17.0109	10.7086	117.918	115.803	153.77	98.6685	147.457	135.031	163.934	147.76	114.836	12.0255	18.1457	21.1585	23.9126	23.0765	30.3206
RHOB	40.8477	44.0102	51.6971	53.0017	32.7428	89.2656	20.1371	13.9729	41.3519	33.1354	44.9002	15.2826	21.6548	18.5347	34.714	34.9086	37.9171	27.3621	31.7919	30.4281	32.132	35.7343	30.2758	89.9932	95.7682	152.448	81.9831	66.6853	64.6413
fam110c	40.8254	58.4427	44.2177	59.8538	73.4469	134.786	7.21346	7.49632	9.29022	12.2338	14.3113	3.16404	9.09569	4.67613	1.09779	0	0.702419	0.628812	1.63197	0	1.09884	0.314406	0	8.92114	11.6972	12.8265	3.25447	3.64774	3.77077
oncmyk-UAA	40.8074	37.7833	55.3917	42.0433	39.6324	58.1445	9.54334	8.04655	21.9173	21.7994	20.6292	7.81942	16.679	10.0161	4.60995	3.84992	4.32504	4.60674	4.22954	3.19262	4.95345	3.8748	3.09872	21.7103	21.4992	31.3836	25.5746	20.3018	23.386
ccdc71	40.7448	52.0594	42.1646	70.1031	30.8729	56.1167	10.1542	7.89167	17.0563	15.9292	15.4688	11.4865	11.9625	11.3635	10.1344	8.44167	9.12187	6.86562	5.79896	8.43542	14.576	9.22604	9.88958	5.0375	4.14375	6.47396	8.60417	6.10417	5.04688
efs	40.7367	46.943	58.9723	42.309	23.3057	33.3623	8.60525	7.60119	22.5649	28.4705	36.0068	7.69102	9.19941	7.9816	6.52638	5.8263	9.32278	8.25866	8.45184	7.67898	12.0049	9.36553	7.95833	16.5244	17.7446	25.1433	13.0157	15.7028	15.2695
kctd10	40.7367	52.3113	44.5259	60.6148	58.4715	70.1581	18.057	17.1504	27.6872	27.2755	36.1005	14.6712	23.4152	17.6568	17.8396	16.3982	17.5853	14.6952	14.7599	16.3205	26.1969	19.0238	19.9469	39.1099	37.5409	49.6515	23.8044	24.5758	25.3237
fgl2a	40.7002	58.0709	57.2775	95.5797	65.153	110.805	21.7259	27.4631	49.3178	57.3751	54.0345	37.8391	22.3078	18.6925	38.5182	41.0716	61.9715	30.4378	32.6432	41.4929	37.5823	39.039	21.6875	45.4496	41.1603	62.0197	21.0667	24.3204	20.5748
pkp1b	40.6654	69.5974	49.1159	20.417	6.8445	18.7602	5.56899	2.57074	5.4113	3.26456	3.43057	5.80727	4.83289	2.61936	11.2639	2.44897	6.6452	9.15988	6.12002	4.01183	27.069	7.31713	4.12703	16.993	16.4884	20.1327	69.7957	74.3938	63.5226
cxcl12a	40.5385	36.7326	44.9542	12.6923	21.1557	49.7546	8.1978	11.9963	16.7766	11.8242	11.9121	15.6667	12.5678	11.6557	108.531	116.269	171.359	96.1099	160.037	109.916	118.022	155.566	99.8205	10.1465	28.9029	38.7473	35.6667	20.7399	25.5678
raver2	40.538	61.3355	42.9744	66.393	57.879	86.0556	21.8014	18.0979	47.1397	57.5644	70.8185	22.8812	23.775	19.5897	0	0	0	0	0	0	0.059956	0	0	0.306931	1.36249	1.31958	0.590209	0.778878	0.759626
pdlim1	40.4805	42.7681	34.0137	49.2466	37.2925	62.4938	21.9597	17.9854	20.8536	29.8562	31.3269	17.8881	23.8133	20.2056	29.2859	26.1474	36.095	25.3813	35.3858	34.7729	33.0504	36.6031	30.3526	77.1727	60.4489	94.8269	46.4665	41.9746	32.2264
ARHGAP5	40.4573	55.1864	44.1826	35.5404	19.8977	38.3391	8.98638	6.5634	11.6587	13.9704	18.1849	8.6483	6.87064	5.54277	3.01021	3.06617	4.12043	3.59404	1.13213	2.52585	3.11958	3.41106	2.09043	6.43149	6.73553	8.30213	4.51468	7.16649	6.3117
NDE1	40.4492	51.9788	35.7465	31.4063	25.2786	53.0283	4.38244	5.14991	5.4169	8.46081	12.2295	4.21624	5.01464	3.79084	2.40557	2.95326	3.21577	2.82295	4.08121	3.50189	3.74292	3.80831	3.51464	18.2269	15.5649	19.6445	11.8772	10.1147	10.8961
spry1	40.4	34.28	29.6686	18.0762	9.44667	17.539	10.7467	13.1676	25.3371	31.041	35.24	11.1714	10.4743	7.95333	18.7143	16.6829	23.839	16.2533	17.4029	15.6257	16.2581	23.3505	17.2543	21.9219	21.8838	23.0086	10.8295	6.98381	6.16476
dolk	40.3265	43.969	45.8098	18.4114	21.9833	32.5229	8.10347	9.7658	29.4368	36.8978	40.9095	16.0161	13.5545	12.9176	2.17782	2.36865	2.69765	1.81598	1.71623	1.40458	4.5254	2.01301	1.8575	13.7571	14.1382	21.8333	12.8829	17.1307	14.2107
phospho1	40.3226	74.2869	67.9607	29.7083	145.594	39.7	19.475	18.9821	59.269	69.2976	82.2321	38.4839	42.0976	31.2631	0.919048	1.12738	0.771429	2.57976	1.65952	2.16786	3.70119	1.75357	1.35595	13.8381	9.93928	19.9393	37.994	37.9774	46.6095
rab5b	40.2785	44.9315	46.9422	89.5335	65.997	71.6377	10.2694	10.5883	20.3288	24.8965	25.2679	8.79148	14.0145	6.92694	12.5251	6.17352	7.45205	11.9528	7.93151	6.96043	11.1735	10.9559	10.9482	41.7823	26.8356	45.9741	14.8037	13.7192	17.5875
pfd4	40.2721	60.2952	52.5297	29.8394	50.8314	39.1664	20.7786	22.081	25.2706	40.9638	41.3111	18.4197	31.1216	25.0941	28.3567	22.6418	32.0304	25.0948	37.1505	26.4993	38.1194	31.6324	29.9088	47.8191	49.0564	65.1158	82.2381	69.0796	80.5094
MDM2	40.2249	91.2356	62.1672	35.5958	44.7813	60.1365	16.0749	14.9272	22.7054	20.559	25.2112	11.8656	9.25754	10.2017	11.3807	10.5067	13.3712	10.2536	10.3038	10.7634	16.1064	13.7768	15.2031	35.2687	32.3173	48.7047	25.9955	19.5812	20.086
kdf1b	40.1955	45.7226	31.8483	47.5278	48.8231	66.7256	9.38405	9.45779	15.0826	14.6396	15.2185	7.7064	8.78525	9.09555	0.139147	0	0	0.130798	0.108534	0	0.617811	0.119666	0	11.9601	8.0705	15.0097	5.98956	4.55427	5.12152
bbip1	40.1874	13.3358	30.7936	32.415	16.3502	38.8593	16.9225	26.4747	38.1747	36.5575	40.0732	34.2054	31.2439	25.8236	34.4133	26.0889	51.071	27.2199	27.3859	31.5723	30.1211	37.7139	31.9987	47.0597	39.9639	60.7953	49.1895	45.699	49.6385
atf4b	40.1702	42.579	42.9703	176.871	151.899	187.792	11.7278	14.882	32.7609	34.7811	42.2223	32.8755	26.0525	22.0278	7.99962	7.90636	9.20825	5.43586	7.66654	6.8504	9.10963	8.28778	5.2619	118.514	117.088	150.789	20.1663	19.3388	20.0384
unm_sa1261	40.1338	52.5578	89.7988	51.9825	35.6611	40.8718	14.9524	7.08882	20.27	19.0212	25.0862	4.30026	3.33816	3.24155	0	0.107395	0	0	0.606094	0.092159	0.111854	0.313638	0.289855	7.77555	8.97324	7.90635	23.7282	21.2991	19.0019
irf7	40.1107	23.2822	12.8441	18.5084	12.7458	23.019	2.25739	3.54916	4.55715	1.96483	2.65388	9.32574	3.70504	1.67786	6.70823	7.59113	10.7882	12.8169	10.2942	8.27498	13.6059	11.3949	6.85212	1.91527	2.63309	7.57154	3.03437	1.93046	0.839329
slc25a28	40.0904	53.5102	50.1031	67.123	54.8845	57.8045	10.7534	11.9756	34.4776	39.9641	38.9153	12.6687	14.8848	14.0871	20.8056	14.7944	18.9553	13.7703	14.3848	14.5278	18.0752	23.5095	14.0528	34.7199	29.9492	42.626	12.6057	12.2778	8.85908
hjv	40.0853	55.3942	43.2678	30.9346	5.80601	15.3902	7.82369	8.8639	27.5532	24.9443	31.3279	16.5996	11.3716	12.5404	2.6624	1.27088	2.02165	2.72293	3.65974	2.48564	6.19399	7.06452	5.48475	10.3778	10.3442	14.5197	10.3562	12.6441	13.5519
rnaset2	40.0369	69.2703	40.8058	71.341	78.3101	64.8727	22.4825	20.0892	34.3632	37.4609	33.905	19.69	20.6021	22.7463	11.9111	3.43122	6.1925	8.9754	6.56704	4.68889	20.734	9.36091	4.62669	45.3086	39.1867	53.7909	46.1411	41.428	41.1002
si:ch73-238c9.1	40.008	53.418	37.6961	77.9116	105.828	75.0016	14.3408	9.65916	28.1801	27.8071	36.5354	16.328	18.2556	20.2621	26.037	19.6752	22.9791	14.9743	22.172	27.283	18.0193	20.7468	22.5434	75.9301	91.6029	109.785	53.6061	41.1013	28.2058
PSMA6	39.9927	43.399	44.4277	38.0403	63.7822	43.9908	18.8225	10.3908	29.425	38.1217	42.1361	20.7236	20.7682	19.0259	62.7718	42.5857	78.2142	47.9423	45.4006	55.2813	56.6797	70.7218	53.1376	43.2929	40.4301	62.1809	46.385	51.629	48.7846
cdkn2aipnl	39.9815	73.429	66.6698	59.8488	68.8549	62.784	21.7099	9.68827	16.8302	23.858	24.5802	11.9383	23.1574	14.1111	28.213	16.2191	24.929	19.2932	15.429	16.3611	24.5525	19.1914	23.6775	22.9815	23.0617	65.1235	54.287	56.1389	42.4907
snx18b	39.9686	52.7027	42.187	26.7799	22.4007	40.2305	10.0453	9.08769	10.1487	12.6545	11.1736	13.8403	8.80488	7.46516	1.86179	0.590012	4.26829	0.916957	1.39663	1.89199	2.14286	2.32404	2.6957	8.37456	12.302	19.4663	19.0064	15.09	18.5058
vatf	39.8972	53.364	31.2612	62.8694	79.9977	73.1762	8.03478	10.0232	23.2365	20.7125	17.9652	6.47527	8.76275	7.73802	16.7032	13.4923	16.9753	18.1097	11.9088	13.1847	24.4189	16.67	16.8864	63.8493	82.9397	106.82	39.5425	44.4869	46.6515
pgm2	39.8005	40.2552	39.511	34.1075	41.0581	52.7296	8.40246	3.9133	13.2635	13.7445	16.8144	8.3951	8.02031	7.06552	5.94286	3.6202	4.12808	3.09606	4.51921	4.62906	5.91724	3.28325	4.60739	16.4685	16.2089	17.3217	5.85172	15.7477	10.1793
scamp3	39.6361	43.6796	40.9967	58.6098	45.0626	55.6051	14.319	16.9112	15.9422	23.5855	26.6977	10.9355	16.65	13.4198	14.8061	9.84384	16.1117	15.0573	20.9489	8.95416	22.8615	13.9713	14.8873	20.1528	18.6294	25.7225	20.2684	21.3161	22.085
lsm12a	39.6269	42.7231	48.9458	79.7259	73.3873	76.7533	13.2344	15.3691	24.041	24.8943	20.8172	15.2441	16.7193	13.4665	23.6604	22.2933	23.5238	22.6575	18.6094	18.2785	23.2085	26.8781	21.5106	36.9517	39.2337	62.0403	17.0533	24.8292	18.038
irs2b	39.6053	55.6706	60.6187	300.428	227.705	387.914	20.5484	19.6107	58.1536	59.8694	68.298	31.5762	32.4391	30.1668	4.36238	5.56903	7.88949	3.92213	3.98293	2.47529	2.94849	3.12878	2.58491	22.8787	19.5576	26.7203	10.41	10.5897	8.98862
mbpb	39.3455	39.802	46.4364	84.7697	77.9475	113.117	22.1758	22.9232	44.3707	31.4909	60.1636	24.1313	26.0323	16.5717	48.6505	31.2323	39.6374	32.3939	30.6899	38.1232	39.8172	48.1626	37.5758	78.7172	89.5737	106.172	23.3293	16.7919	19.1333
wtap	39.2614	39.0231	43.1841	28.3046	10.0524	60.9529	5.83282	1.11135	1.27511	21.1004	24.6827	1.13007	10.7437	1.60083	12.2835	12.0245	13.5861	10.5226	12.815	10.0304	18.5595	13.4844	11.5485	3.66155	2.96758	4.9478	13.7162	14.5983	15.7103
arrdc3a	39.2448	35.8881	48.6522	42.5435	36.6441	32.2778	24.4799	23.9533	113.083	70.9372	107.517	80.9424	93.0298	79.7593	66.68	50.1812	54.7101	49.7399	49.9428	48.903	65.9143	60.0338	45.0076	11.0644	17.277	20.3462	55.0817	58.8829	55.0821
igfbp7	39.2296	10.2943	5.36569	3.19469	11.1615	34.1712	2.25498	2.42818	13.7237	17.8533	2.25325	13.0718	18.6178	10.5372	11.2042	10.3543	15.5311	19.4724	16.7029	14.0101	15.2079	13.5203	11.1205	2.81232	3.83538	11.9979	11.7504	6.32892	4.31525
si:dkey-238o13.4	39.2205	47.4887	50.2483	53.9163	24.3539	33.0724	9.68526	16.6992	22.4861	24.6872	26.2324	27.5392	16.3685	17.5784	0.671979	1.03453	0.752988	1.4077	0.841965	0.432935	0.887118	0.49668	1.0425	8.96282	4.9575	21.6202	16.5604	21.3718	25.927
plekhf2	39.1941	37.6292	29.2276	35.1258	34.7242	44.5435	14.7323	16.1961	37.6854	43.4297	43.0161	26.3561	21.8929	11.5074	5.51004	3.80723	6.62784	6.31191	7.7577	6.07497	9.58233	6.91031	6.917	30.1767	29.3655	42.5141	9.65863	8.42838	8.61379
NDUFA5	39.184	62.9146	42.4124	43.6208	49.9867	32.061	19.9268	35	37.3437	42.5998	33.8248	41.806	40.6785	37.5443	94.4789	66.8891	118.416	75.6341	98.1563	89.6951	105.272	113.671	109.395	93.1452	102.824	187.623	140.915	119.946	119.831
ELOC	39.1551	32.8152	41.1634	49.5858	72.1848	83.9719	9.22855	13.6089	23.3944	19.4843	22.8952	12.6584	17.3168	13.0941	70.5784	65.5693	73.6493	61.9035	66.2145	54.2277	78.6452	82.2219	81.9208	33.1436	34.0281	58.3482	19.9571	24.3498	29.5429
got1	39.0146	72.5332	63.7233	108.374	169.964	325.434	10.9709	9.36812	8.67961	9.96764	11.1327	5.36812	4.71117	2.42233	1.41181	0.495146	1.63916	0.863269	1.69498	1.19094	1.3568	0.825243	0.975728	20.161	28.4102	40.0271	19.0255	21.9134	19.1222
YY1	38.9426	50.2796	40.6194	63.6462	64.4093	96.7161	11.427	9.18526	13.4916	15.3411	18.1391	11.4701	13.383	11.6429	15.9677	11.2652	14.5866	12.1024	15.1541	13.0215	17.0986	17.1264	12.3289	20.1149	17.7291	26.9067	11.7367	10.2956	9.87219
sntb2	38.8781	55.7608	63.9212	72.5822	69.6831	121.723	8.44218	6.8288	30.5737	23.1434	25.9178	10.8798	13.9881	14.1525	6.2432	4.31406	7.80556	4.61395	6.22449	6.49717	8.02324	5.26417	6.22052	34.1389	36.9433	49.5816	18.9569	18.7693	18.2222
B3GALT2	38.8514	49.1807	42.6291	35.9737	29.9893	41.778	6.58654	9.25939	18.0605	24.0238	21.6385	7.82389	9.26355	9.08784	5.50037	5.39124	6.42094	5.50111	6.87082	6.2873	9.78619	5.82331	2.51596	7.45839	3.95991	4.22569	4.92873	5.52054	5.76541
ARHGDIA	38.8068	57.2815	67.3306	68.2921	50.5751	62.0762	10.6996	16.8913	14.4219	16.3151	21.9132	15.9879	14.9468	10.5019	28.2747	25.0932	23.9879	21.243	23.8913	19.8049	32.2343	23.6883	22.6947	50.2506	52.1872	65.4313	47.6968	43.1736	38.1521
RAB27A	38.7773	64.0391	50.0472	97.0988	76.6608	78.1918	13.7832	7.64012	24.149	25.4063	30.6305	9.90118	9.69617	7.81416	17.705	8.60324	9.73156	12.7876	11.4558	10.1416	29.8459	7.13864	9.05752	32.8584	29.1047	47.2153	23.9322	23.7109	24.6799
psmg2	38.7575	48.1012	57.1716	34.5218	32.5594	36.5709	13.4253	13.4599	14.2032	19.608	23.6341	18.3335	12.9889	13.4552	18.3279	16.3151	19.0709	18.8711	16.2912	16.4061	21.3237	23.3134	17.0694	8.45575	15.3548	18.4564	24.9428	24.3856	23.0068
MAPRE1	38.7145	45.4946	36.2316	3.6359	34.7211	2.8193	13.9271	0.552308	10.6972	0.840149	0	10.517	1.20326	1.9192	19.1143	18.7856	25.855	14.8967	15.9275	11.4099	27.1303	19.3144	1.63857	15.8836	13.153	18.4644	11.8017	2.67838	4.20564
bnip1a	38.7009	40.7547	43.5866	69.3057	67.559	56.3246	5.28821	7.9083	20.7686	11.3064	17.4731	5.46143	10.3712	10.7176	1.89811	3.86463	1.36244	2.34935	3.06987	2.48763	1.68559	1.85153	2.49927	42.8544	45.7969	82.7263	36.8253	34.2649	35.7453
opa3	38.6873	21.3539	33.6423	40.7528	21.2266	27.3464	4.73595	8.11423	14.103	13.8052	13.0375	3.85768	13.5955	6.49625	9.90637	3.51685	4.85955	5.60487	3.5618	7.72097	6.11236	9.34831	2.66854	7.79775	10.1086	14.6723	8.54307	12.8558	11.3071
slc52a2	38.6551	46.6438	34.1103	58.6027	54.1746	61.8641	8.58728	8.34422	15.0699	15.8093	15.9881	8.464	10.7323	10.2378	8.87566	6.8883	11.4299	6.23955	6.06603	7.11398	8.84053	11.4882	6.25536	30.2332	25.3231	41.5634	11.4921	8.72568	9.69898
TMX1	38.6295	53.4066	44.6519	52.5273	32.2984	49.6328	9.77814	7.97377	11.9825	13.7164	14.2519	13.5956	9.57268	9.16066	13.0273	13.1574	15.6514	11.8683	11.8918	15.6131	11.3814	15.8328	15.8481	13.494	10.6459	16.0929	8.22732	9.7224	9.82514
si:ch211-244b2.4	38.5968	21.7291	28.7048	19.2783	14.9439	19.9503	1.69206	4.57037	3.03862	3.83228	5.09418	4.44762	7.66032	2.15132	2.81534	2.21164	4.14921	5.98307	3.43862	3.47143	9.48466	3.73228	2.75238	5.51323	5.02222	6.60318	6.71746	8.59471	7.0127
slc3a2b	38.5274	38.9598	13.831	77.0733	48.0587	60.7991	5.92985	6.31824	29.9959	37.3409	39.7165	29.0032	16.206	19.6419	80.9818	108.458	100.492	55.3571	77.3661	59.9286	60.9554	54.67	48.4519	45.111	39.293	46.9668	4.09215	3.55293	3.23406
dipk2ab	38.5173	27.6844	34.9553	94.822	139.225	56.4666	12.8342	12.86	15.6147	22.0131	22.8708	9.42784	6.74265	6.85084	2.1372	2.70869	2.93786	2.55719	2.48625	2.89139	2.84685	4.12139	2.1548	9.27826	8.67349	9.81373	7.05747	6.95408	8.76009
EEPD1	38.5043	37.7099	44.4348	35.3654	8.12989	32.0187	13.164	7.97888	23.4629	33.7863	29.6476	20.6638	21.2602	19.0184	2.79596	4.13213	3.32539	2.65708	6.61798	3.26382	2.75865	3.68764	3.7627	12.8557	13.1231	17.6452	14.8571	17.0789	14.8998
cyb561a3a	38.3832	0.344718	0	0.432432	0.487042	0.335879	0.213478	0.115515	0.248654	0.296089	0	13.6385	0.25504	0	0	0.09465	0.263277	0.701029	0	0	0	0	0.08305	0.020827	0	0.541097	0.110169	0	0
JMJD6	38.3721	62.886	40.7427	40.9929	39.0335	40.1358	23.1165	14.0274	23.3924	30.0691	26.1871	8.20278	11.2591	11.7099	29.3396	23.7755	26.8617	16.0363	18.1148	13.4319	27.1903	25.0171	16.4925	12.4897	11.2673	16.0606	9.46686	8.73414	6.75624
marcksl1a	38.3585	44.4791	42.9246	21.7353	18.0117	38.5544	25.7554	20.139	25.3585	35.9933	51.5712	29.1089	25.6248	23.6097	77.0754	79.7462	113.432	96.0168	100.25	118.436	136.916	118.594	114.38	76.4992	73.8526	90.4539	97.0988	96.4556	101.791
vps26c	38.3135	34.6748	43.3293	43.9871	41.4187	57.4167	13.568	10.2775	18.7189	17.7306	14.9927	11.8325	9.97735	10.0939	6.91505	5.4199	8.21602	6.43366	6.24919	6.92718	11.5178	8.80987	8.6343	42.0316	42.5113	47.9195	38.0871	31.1893	23.3815
manbal	38.2952	56.9889	57.0135	65.818	41.8967	53.091	17.8893	18.8475	24.7515	29.2669	24.0418	17.615	16.2411	12.0824	55.2952	48.5264	59.7958	39.9213	39.5437	44.0172	66.8758	60.8106	50.1353	53.1857	58.8561	86.139	43.198	49.0185	46.4785
zgc:162255	38.2932	50.3676	51.1195	48.5574	54.33	52.1158	12.3327	12.8479	21.6232	24.3906	27.2555	12.7528	15.0161	13.1383	6.54182	6.0262	8.77711	4.32123	5.24173	5.0216	7.96875	8.02436	5.01884	12.5758	11.2817	21.2417	9.36213	8.29596	7.2238
hnrnph1	38.249	47.7041	57.1365	49.2788	54.6607	49.9514	8.36123	5.49645	14.9073	16.1	17.9397	10.2037	7.52755	7.95993	27.4904	25.553	32.4956	25.7494	23.8337	26.2369	33.7057	26.235	21.7541	26.904	25.8321	32.2431	18.3612	20.7474	16.4633
bbln	38.2254	70.8075	39.5796	67.8172	66.0949	69.3753	14.1932	12.2888	25.0235	23.6994	24.9231	15.7929	14.9335	12.9467	5.58241	6.12119	7.51385	4.79294	4.10734	6.24238	8.59972	6.87673	5.64335	28.2673	32.7985	42.8112	30.9398	38.0547	33.0665
pef1	38.2089	41.3912	41.5318	78.5874	85.7672	72.0199	15.6602	17.2333	31.7988	32.2379	34.9328	14.8492	22.8273	14.6908	11.8767	6.78706	11.3036	8.47937	11.4824	11.9822	19.4901	11.3449	12.7962	29.8874	27.6979	43.9908	15.9669	18.7896	18.8212
TMEM51	38.1686	55.4864	55.6445	31.9103	13.3793	23.4514	7.59007	7.08362	21.8484	20.7879	28.5663	10.3821	9.82529	7.5187	1.69613	1.69545	3.60639	1.84976	3.11557	2.31271	3.70292	3.95445	1.78926	9.81033	6.57648	16.2189	11.828	10.1747	13.1244
mthfs	38.1448	71.5052	34.5444	68.7371	43.5828	57.7819	26.4452	32.7743	40.9794	57.8101	42.5035	28.9428	38.8773	33.5197	5.74948	6.27651	10.7644	6.04262	6.70686	4.72523	4.23805	6.61227	6.39705	26.9977	30.4883	42.1514	39.4141	33.3784	36.7279
noxo1a	38.1393	37.8329	11.8255	20.6802	31.7001	10.9401	3.16465	1.64872	5.40097	3.01211	5.78286	2.0498	1.88448	0.996187	2.51753	0.197866	0.77546	2.28873	0.746299	0.446916	0.977014	0.065276	0.105666	8.88448	11.6117	17.376	1.87416	0.842306	2.42553
herpud1	38.1022	39.254	43.4334	213.085	261.966	239.037	12.23	9.46228	15.8152	23.9311	23.0179	13.3441	13.6859	8.97729	7.28407	5.42379	7.40416	6.24865	5.99461	6.46343	7.02675	6.38568	5.09546	146.238	141.503	191.04	20.9115	16.9428	19.2883
if6	38.0941	10.3756	49.356	38.2276	36.1432	40.3753	0	0.653905	2.5487	1.03239	2.2701	0.302824	0	0.957621	1.51945	0.84097	1.46285	0	1.88278	0	0.804597	0.864501	0.181896	0	1.44927	1.91477	0.586897	0.760302	25.1901
spink2.1	38.0748	61.7681	31.3327	55.6939	67.8438	109.9	22.2895	17.7169	46.2381	49.1961	44.3281	20.4562	27.4721	29.5355	35.5827	15.8447	21.3186	43.1786	20.9623	27.4513	85.6314	22.7693	26.4023	27.5233	27.3459	43.6262	23.6317	16.7157	22.7145
crk	38.0706	48.9305	48.0043	43.8643	47.2932	57.6851	9.74701	11.8925	26.6808	26.7535	31.1021	15.8263	6.89142	10.456	4.2899	4.79913	4.85885	5.70358	6.88708	1.60261	7.28665	6.3203	3.70793	9.16938	10.595	17.9045	7.44408	9.09121	5.92617
ethe1	38.0457	58.6517	50.5532	9.87594	8.90116	15.5617	16.5753	22.0958	11.1459	11.7416	9.3122	9.36265	11.5828	7.20007	5.46217	2.37696	6.61759	3.35924	6.63224	5.66803	9.99114	6.46489	5.26176	12.1748	12.7553	14.1033	29.9523	22.6097	28.8061
zgc:153675	38.013	77.5911	55.1393	184.708	293.819	272.901	13.6328	17.4219	54.2057	44.112	56.8438	19.9349	17.5703	30.6771	36.0911	26.0391	33.737	18.5573	29.5104	31.3151	40.0599	35.4271	24.1406	157.974	176.801	269.863	35.3828	41.2682	39.5039
zzef1	37.9701	43.8368	47.0779	62.7933	74.8457	82.1305	11.8511	12.4712	28.3721	31.9013	36.22	12.1851	11.9199	10.3205	3.18318	3.71241	3.31121	2.72231	3.36306	2.24571	4.30978	3.2063	2.57656	5.28473	5.44787	7.58047	2.22083	2.13953	3.22182
serbp1a	37.9646	16.3427	59.1804	43.1162	4.01818	1.19833	24.4063	28.3179	38.5195	42.0558	56.8781	32.3349	36.661	27.4066	124.764	149.191	159.782	150.582	151.466	151.375	211.575	189.25	170.314	39.8069	4.15615	52.4617	41.3641	37.2725	33.3776
gpr146	37.934	37.2748	54.2887	109.544	156.648	231.291	19.8681	15.4782	35.004	39.2183	36.9544	14.6587	16.7282	13.8884	3.05159	2.65179	3.96627	1.44147	1.89682	1.1379	2.41964	1.81399	0.875992	22.5774	21.0645	26.9812	8.35814	12.3135	7.55258
ppp1r1b	37.8907	57.6776	74.6033	13.4234	6.15701	10.1533	11.5313	8.29065	14.3907	19.3098	17.7916	13.807	7.98785	14.4009	15.1673	38.8776	42.2262	32.3972	53.3963	44.3738	36.9369	53.036	26.9421	23.8668	26.2145	31.5701	71.0402	86.1257	70.172
TLCD1	37.8721	39.9289	43.3643	54.1589	18.4238	67.509	14.0142	10.5594	22.0078	21.7119	28.1253	11.553	14.8346	7.94186	5.61886	3.1615	5.5155	3.81137	4.44121	4.58786	9.36046	6.64987	5.97674	20.208	18.0788	19.6008	26.8307	23.6195	14.9483
chrne	37.8689	65.9342	38.6858	40.8355	44.7251	97.3392	12.0499	12.6062	26.1476	24.6868	37.9809	11.371	10.3015	8.4034	1.02654	1.39384	0.910828	0.93949	1.71868	0.723992	1	2.07325	0.980892	9.21868	14.7771	14.0913	13.9278	7.03716	9.71762
fbxo7	37.8504	53.6337	54.721	29.351	36.0201	39.7653	8.8132	7.73302	18.2845	14.76	21.5345	7.56846	10.6717	7.67227	12.5737	6.38332	13.0737	8.00429	13.3879	10.9086	10.0556	13.1014	10.3898	10.1574	9.43806	11.2045	5.48336	6.6439	6.43731
TFB2M	37.8164	53.484	45.1598	33.9726	44.5598	47.8776	20.6274	21.2639	35.29	43.3155	44.7123	23.205	32.5174	26.9137	116.319	83.6014	116.085	74.5251	82.8438	93.3292	99.274	104.962	82.8922	32.511	34.1087	48.2667	49.9986	38.6219	45.2068
coa3a	37.7987	45.6469	37.2079	36.1386	35.3399	48.7756	6.64356	9.9802	16.0297	26.1221	23.9868	14.3597	15.2508	16.0396	55.4092	39.4554	54.7327	51.8053	51.3531	46.5347	55.9505	66.033	55	29.0726	18.6865	37.2343	31.9538	27.3102	31.5314
ccar2	37.7779	41.1569	39.0991	52.9708	41.8271	69.2247	15.7463	16.6968	23.5976	25.0894	25.777	14.9754	13.346	13.5045	49.6469	40.7567	46.3671	38.4407	33.868	33.0177	44.1944	48.173	31.3857	19.3699	19.1734	27.7443	12.8099	16.6903	16.3465
vps26b	37.7203	49.1349	39.4748	52.1503	42.497	45.2186	13.9513	7.81469	26.4099	17.5884	18.994	10.7728	9.14945	15.6917	6.45004	3.94108	5.49103	4.93766	4.99488	6.55252	12.737	5.83518	3.9035	26.6157	29.5055	48.1486	24.45	21.5892	23.2489
MRPS22	37.7075	34.1323	35.0627	53.5473	26.6567	32.2099	13.4338	7.60497	16.203	17.3622	24.4259	17.2567	17.2697	8.00199	32.2856	22.6517	28.6866	22.1841	20.5821	24.5035	33.3602	25.9294	22.398	30.1502	25.4269	33.4945	30.8468	34.2716	31.4055
elf3	37.6588	70.7733	23.6929	40.4162	16.0043	10.1874	8.18053	6.77837	19.1027	19.3813	37.4139	7.27951	17.4466	10.3137	1.86692	0.322392	0.340967	2.8514	1.85929	1.02646	4.21374	0.232824	0.750127	41.4556	39.7211	57.5276	9.88728	7.45305	12.8553
tmem205	37.6526	33.8466	38.4727	51.2257	39.4621	39.0212	26.1376	32.9356	52.821	54.2981	82.9577	42.6667	45.7337	33.1878	16.5802	16.8342	24.6032	16.4912	25.2205	23.963	33.2584	18.6437	17.6596	49.4339	47.5503	61.5035	56.0132	50.7645	54.8959
nfe2l1a	37.6202	27.5902	43.8364	101.828	102.007	243.423	15.9504	17.3726	24.3455	24.6243	36.1946	19.6402	18.1594	17.4137	9.69969	8.05273	11.2323	8.30748	12.6782	9.13629	8.50834	5.61904	4.42458	26.5514	28.3001	36.5035	8.66654	11.1268	7.47732
elmod2	37.5914	29.9219	29.3878	31.3254	23.196	21.8797	13.2908	12.519	10.2668	11.413	0.507812	11.2951	1.11937	10.7551	0	0.653473	0	0	0	0	0.980116	1.98242	1.23533	37.0965	0	19.0072	0	31.1855	12.2095
arf2b	37.5801	62.7073	45.151	53.3883	64.0527	74.4514	11.575	11.5295	16.3588	23.1293	25.485	12.7198	17.2037	16.0346	23.3878	17.726	24.2875	16.2668	16.029	13.6939	29.2022	22.4405	20.2673	26.167	35.5972	49.3154	35.985	24.5651	27.3449
cdc42l	37.5747	60.9609	80.8411	71.6094	55.5946	67.6988	20.7752	9.99306	31.7142	34.1658	39.7535	16.7031	21.2691	16.9462	35.743	22.8403	29.8264	21.9688	26.7969	27.0078	51.1337	26.1363	21.6476	34.9783	43.0087	59.6493	33.3898	34.5859	27.1736
tm2d2	37.5379	38.5354	39.4418	34.8288	40.3934	40.8733	20.1378	14.6691	25.4475	23.7102	23.9131	16.8565	17.764	15.7672	22.0993	19.843	23.8521	18.7013	16.0721	16.0105	23.864	28.7563	20.414	29.796	33.0415	44.2688	31.209	30.2597	34.0406
cdh5	37.4972	45.506	31.9123	43.9256	36.3546	54.8962	8.62745	7.03328	13.0055	11.8291	15.8337	7.45767	9.21186	6.06043	18.8957	20.6584	27.1282	16.1259	19.56	16.2768	20.4796	25.2086	14.8256	15.1173	12.546	23.7349	15.1617	14.742	14.8433
akt1s1	37.4092	49.7502	33.187	65.5192	51.499	72.214	9.01148	8.84335	10.472	12.2167	14.5388	8.03714	7.7792	9.06077	19.6232	11.181	13.3612	11.6658	11.6212	10.4706	16.5057	16.5847	12.2674	44.2512	41.4453	55.5746	29.8697	25.6982	32.5192
plpbp	37.3966	38.6329	58.0107	112.346	103.29	78.7165	23.8081	15.3199	28.0659	32.7551	39.0568	22.2165	22.8403	25.2326	141.072	155.425	160.865	117.979	172.139	138.282	171.861	178.091	162.767	47.4223	55.6994	77.441	39.9432	34.1018	33.7149
ell	37.3482	37.1153	30.6494	79.4018	103.862	169.391	11.1514	8.43645	25.1383	22.2103	26.3553	12.7392	13.2674	10.2943	48.9954	47.4156	46.3917	19.0672	16.6951	19.1534	37.0237	50.5306	35.2993	14.1981	12.2021	16.3753	13.7767	10.2771	11.7478
trim107	37.337	48.8772	47.3401	30.585	41.3069	43.5187	4.32351	6.25353	13.0295	16.4721	15.7238	7.9558	6.62063	7.33333	1.62308	2.36219	1.49969	2.0043	2.62431	1.26212	4.69675	2.48864	2.76427	11.6894	10.8785	16.6654	4.25169	7.03376	7.63781
ndufa10	37.3262	76.7304	59.8772	53.2	41.938	50.2065	22.9464	22.8087	29.257	29.9483	38.5509	30.4586	32.4722	24.5232	92.2681	85.1798	118.065	68.6844	91.7312	84.0996	110.516	105.679	96.0266	49.2935	46.492	81.9871	76.2684	77.011	81.0597
ssu72	37.3034	68.3076	55.1553	232.259	281.404	301.015	13.351	15.2688	16.1421	20.7866	26.5965	15.4024	15.9289	13.1946	14.4469	13.3739	20.9366	13.0599	10.847	12.3761	20.2172	14.7315	11.5873	122.24	114.86	157.246	24.1564	26.3593	22.9969
dmac2	37.2536	46.6111	56.8851	40.6553	22.1007	34.8803	17.8851	15.4886	26.8015	37.3808	40.5935	15.4364	24.2773	24.641	43.2127	34.2934	48.001	43.1154	41.8856	42.5413	59.4682	42.3865	45.5537	24.736	25.9677	36.51	37.1197	51.0959	43.9179
lrrc8aa	37.221	37.5988	33.1839	35.2769	42.5284	35.1105	7.51418	6.52919	12.6197	18.3353	19.0834	7.15638	9.91243	11.2982	5.6593	6.70309	7.08632	4.61968	4.7573	4.14095	6.66389	5.1643	4.69058	5.99333	3.59633	7.62177	3.36614	2.46581	1.91368
oser1	37.1805	40.5332	41.5159	66.0376	74.0874	102.443	12.8935	12.4758	23.4343	32.5344	45.5638	12.7149	17.4024	16.5153	46.5625	34.0596	42.0832	34.3157	31.6314	39.639	52.8412	47.3763	41.1454	32.264	31.1881	45.9643	16.5	16.2761	16.3501
myorg	37.0408	41.8589	38.3635	44.4979	59.5271	79.5504	5.80607	7.06926	13.8839	14.0213	14.7428	12.1041	12.3381	9.06327	23.0213	23.4691	21.7413	20.8794	20.9828	17.2617	21.7697	24.2332	17.4568	17.9974	15.1932	27.5837	5.04493	4	4.52639
adtrp1	37.0158	52.1337	87.8703	51.2307	35.8733	54.9426	18.902	20.5297	25.5431	31.5822	27.0218	17.2851	15.8287	17.0634	9.10792	6.17921	11.7406	7.25347	5.80792	7.59406	9.38416	11.6332	6.67723	65.4564	66.9723	90.7624	53.7064	55.4822	44.3079
cox7a2a	36.9691	67.0432	80.1379	33.9259	56.3772	36.2613	45.9499	44.5844	57.4979	73.022	77.2593	51.8621	55.2551	56.8628	30.6872	18.3642	26.6976	30.0734	20.7078	30.1749	39.9189	24.8189	23.2737	52.6173	45.2531	91.8461	86.1559	82.144	121.724
vps26bl	36.9557	48.5135	48.4451	60.9783	31.2428	47.2375	10.8208	8.93015	11.7408	12.0877	12.3227	8.92293	13.7948	9.23699	3.06647	3.30251	6.39403	5.73699	3.46532	4.74277	5.53757	4.18786	4.18979	17.4942	16.5723	15.3931	19.1113	10.8854	12.4846
cited2	36.8865	42.5078	46.6269	13.8837	0.285106	16.322	14.0511	19.4638	13.7135	21.3163	11.2922	14.4539	14.878	8.65248	26.9887	38.2454	22.3291	29.8553	32.505	24.7745	36.2525	37.166	28.3248	7.1617	10.4553	17.8184	37.3064	54.6255	35.905
ankrd9	36.8593	63.2572	75.5732	12.2814	4.25029	10.436	4.19839	5.12457	1.73241	4.18108	2.64821	2.81776	0.761246	3.31949	69.4983	124.935	119.368	53.872	59.7947	73.6044	18.4971	31.7901	22.5352	1.1188	6.21569	5.74279	25.2341	25.3691	22.1188
U3	36.8287	71.5867	358.721	17.047	11.2546	91.7952	242.551	468.293	111.699	88.2996	117.9	348.461	799.934	458.77	0.381944	0	1.35185	1.61343	0.462963	0	0.12963	0.75	0	0.569444	0	0.347222	1.62963	0	0
U2	36.8037	38.4392	15.0935	26.2991	29.7009	24.8598	14.6168	6.88785	13.0654	9.14019	18.0654	10.8411	4.57944	4.71028	26.2056	25.0187	22.3271	22.9065	15.3925	20.7664	23.2243	25.9439	18.0654	40.3738	38.8318	33.6355	19.3645	24.8505	19.6168
zfp313	36.7644	31.5301	35.781	23.7926	24.6215	22.4669	7.4546	17.2736	22.3485	25.9313	36.5049	15.5301	15.9693	19.0331	18.054	10.3436	16.208	13.5485	13.3558	14.938	19.5049	14.0233	8.70307	31.8577	28.8147	49.1896	31.7767	28.6387	16.8951
grpel1	36.7589	31.7133	34.5218	42.9129	49.7476	38.9875	17.4183	13.3944	14.4851	22.2727	22.9702	16.0009	16.0943	13.4099	26.8807	22.7416	25.1915	24.4899	22.0119	20.8813	32.9311	43.5137	23.8538	55.3192	53.6817	77.0149	45.4266	56.5409	47.3347
mrps23	36.7199	56.699	45.9177	24.6953	19.2666	26.7506	14.6953	16.0774	15.5135	22.9988	26.9767	14.3747	19.6069	17.8673	21.6192	21.3145	28.5627	16.2002	25.9963	22.5872	31.086	31.4945	26.3833	13.0442	12.3593	20.5246	25.4472	29.0246	23.3219
fam177a1	36.7092	39.9641	38.7141	43.1242	30.8693	29.8448	5.08824	3.10784	13.1928	10.366	10.2876	7.31209	6.1781	7.42974	19.6127	18.826	26.2778	19.7402	16.549	10.7386	27.0752	18.8987	12.7402	31.2484	26.8513	45.5278	30.2059	27.7173	30.7451
nudt9	36.6786	41.973	44.6417	50.4827	45.486	44.2655	10.9645	10.4871	19.8987	20.6018	25.2221	11.9824	12.6417	12.9934	15.1753	9.53605	11.7661	11.2587	10.9923	12.7611	18.2347	13.6417	10.8974	16.6791	18.301	22.0212	18.8465	22.383	20.8663
mpzl1l	36.6496	48.2444	40.6283	47.0502	28.5781	56.2935	12.692	10.2902	26.8404	28.1362	32.4152	12.0022	15.8449	10.6083	11.3147	12.2427	13.9051	5.80915	11.7433	8.36942	13.9196	14.7645	9.85659	9.97656	14.0335	20.7946	16.5179	12.0592	9.01116
cnot8	36.6494	48.1446	34.8049	40.6442	27.5752	45.7122	10.0485	12.0324	16.0504	16.0086	16.7545	9.4529	14.3606	10.3216	8.74215	9.85014	13.0628	7.49381	9.05709	10.0932	12.8135	12.1598	12.0871	23.2997	21.9106	22.5243	27.2873	16.5799	19.4786
tmem205	36.6278	10.1	12.857	12.4477	44.298	45.2068	18.0643	20.3899	48.337	39.2478	43.2537	29.8575	30.787	26.0575	10.8657	12.9746	17.3421	1.04861	11.8296	19.0126	25.3615	16.2356	15.4361	12.8798	15.249	18.2816	18.4099	14.3859	20.0273
gas1b	36.6089	50.9449	50.273	89.2688	91.8591	199.443	15.7686	17.1371	29.2189	43.5601	26.5403	17.4516	19.7793	20.4888	8.97107	18.2755	17.3447	12.3346	18.2969	11.7899	13.6591	13.5836	14.3208	11.2931	16.5934	27.6215	20.9725	28.0201	23.4606
cnot8	36.5775	35.081	41.2179	43.162	31.8182	31.2022	10.6643	6.69639	19.6084	20.5653	25.972	7.06527	13.1993	11.6107	12.4015	12.1125	13.8217	12.2564	10.039	9.77856	14.0967	9.42308	14.9161	25.669	34.2273	34.0688	20.9417	21.0268	18.4219
APOO	36.5614	31.3612	40.5486	37.4498	47.6116	39.4721	11.0782	10.3381	24.2903	24.5837	21.8325	12.0367	15.7448	13.9003	16.5247	9.56778	20.5678	12.5	6.49043	12.2711	18.6707	13.9131	13.4099	37.8979	32.0526	51.1348	28.299	24.2289	26.4577
TEX264	36.5521	42.975	30.0083	29.0677	30.4469	34.4917	15.6844	12.5729	22.3635	15.4521	20.8177	14.9365	18.926	16.2542	2.34687	1.81458	2.39479	2.09375	2.61458	1.85625	3.85833	3.16042	2.77188	21.9094	22.676	31.3438	18.725	25.4354	16.4365
zgc:136493	36.5364	27.6181	48.6435	70.6876	64.5166	64.9216	8.16225	9.41722	14.7252	20.6313	16.8841	14.34	12.2671	10.7252	6.9713	4.06843	4.7947	3.28477	4.91501	3.8819	6.9851	5.18819	4.03201	25.83	22.1192	30.3592	27.981	23.553	23.0662
vma21	36.5232	43.761	34.5463	26.8329	13.8341	20.4207	8.86219	8.76951	14.5341	10.1098	10.4183	8.57805	10.4488	10.8049	45.2805	32.4134	39.8854	27.1512	20.2366	38.6683	32.0957	47.8195	37.0122	25.3701	26.0744	25.2768	26.3476	36.8561	38.1939
arl1	36.5174	35.7102	50.8532	77.1573	122.713	127.402	10.4988	19.6474	32.1915	46.5299	53.5211	12.1754	16.6256	14.4789	27.4391	13.0466	17.4279	24.0243	20.6766	15.8246	37.3141	19.153	16.7867	58.7693	54.8744	74.7593	14.949	20.8246	17.3682
tmem82	36.4837	43.5311	41.8115	104.521	48.9294	92.5738	11.2396	7.73213	18.6323	20.7855	27.442	13.7094	13.3008	8.40111	2.12999	0.603528	1.38533	1.16899	1.37047	2.4299	2.35005	1.75487	0.749304	23.1794	18.9085	27.2581	19.0887	17.6964	18.9995
mrpl16	36.3788	48.4522	42.7619	59.0847	60.4935	54.0326	29.1223	30.047	41.2326	54.3784	63.6787	27.237	35.0405	24.6968	50.7699	49.3944	65.4645	34.6324	44.7583	40.1017	52.7905	57.2735	43.2359	52.9457	50.7272	72.5297	93.8686	82.6766	85.3915
azi2	36.3685	41.293	41.5478	42.7649	31.9833	41.9728	6.29801	9.38659	15.7308	19.3363	20.1325	4.83278	7.66176	6.59582	8.89073	5.15149	12.6084	5.41225	8.14321	6.72765	13.1802	9.09685	5.46965	9.78038	10.2835	21.0584	6.85348	5.2697	9.27483
foxa1	36.3326	29.0507	28.0975	20.9378	8.80396	22.88	9.73954	13.2285	17.3486	25.0831	17.7781	24.3051	15.1707	12.2148	0	0	0	0.116189	0.303965	0	1.22907	0.894273	1.14042	10.3475	11.0991	17.2506	18.6514	27.1669	18.1057
ammecr1	36.3231	40.1549	45.8118	42.9277	33.2805	48.1856	8.48923	5.09128	21.6277	19.0667	22.581	11.0626	8.85385	10.6605	5.31897	5.58256	8.47949	4.38359	6.48	4.34462	6.45333	8.13538	3.40923	12.5487	12.0103	13.8692	6.00718	8.19487	4.69641
zgc:153993	36.3002	44.2488	10.8968	52.4167	39.178	4.4843	0.924568	1.38108	1.65386	20.4177	13.1886	0.397938	1.11433	4.68734	15.4927	10.0316	18.0083	15.477	0.955041	0.77768	0.694115	0.813428	0.77646	15.3449	21.6349	1.25038	14.7253	0.866658	1.23691
mrpl15	36.2594	33.4361	47.1393	36.6254	31.781	36.4256	11.8444	14.5101	25.8232	22.0538	24.0163	13.9404	18.5024	15.4486	69.976	53.4107	68.708	48.7685	48.1547	55.9174	66.3449	70.8886	60.8886	16.8818	21.7464	26.487	21.2699	26.072	22.6619
rhoua	36.2412	26.2994	35.0468	42.3676	17.0832	15.4938	13.184	11.6762	22.7448	30.7048	31.3591	20.0005	17.315	11.7178	0.926195	0.864865	0.807692	0.699584	1.38046	0.576923	0.505198	1.07173	1.68815	14.2526	16.9657	23.0277	14.3825	15.368	12.0447
si:ch1073-314i13.4	36.2108	39.5248	41.8967	48.7284	59.6789	58.2164	26.3098	22.495	31.1499	39.6124	41.7836	23.2546	35.686	32.9774	98.3098	74.2504	96.8232	60.8218	84.7228	63.4851	105.665	105.44	79.7185	32.7256	35.1782	45.7595	49.4427	54.9236	48.8204
pcdh12	36.204	34.3738	31.337	19.8762	10.6713	31.5132	7.72002	5.56978	13.337	11.937	12.8366	7.80286	5.40944	4.98512	1.25105	0.94187	1.92334	0.905925	1.46392	1.30441	1.64476	1.73097	1.73828	3.58214	3.58635	5.50688	6.3499	5.9604	5.09408
vsir	36.1708	42.2434	39.8292	31.9342	9.55593	20.1947	8.69044	7.90862	15.7114	23.795	24.6524	10.6396	9.81298	12.7361	5.35354	3.70623	10.813	9.36123	4.8181	8.18617	16.9607	4.68659	4.02818	3.67891	1.33476	7.25875	6.8924	4.52178	4.98463
elf3	36.1408	71.2731	24.5612	39.184	17.767	20.0552	7.77783	5.94342	18.0812	17.6096	33.8824	9.81658	15.4705	14.9834	1.74593	0.281339	0.244943	2.35149	1.45423	1.02015	3.62513	0.20479	0.763859	40.7844	39.9941	56.1086	11.313	8.4728	11.8143
egln2	36.1177	62.4439	52.0782	27.567	55.711	58.2653	8.75416	10.3378	9.90956	12.6512	16.7199	3.13877	3.89709	2.90333	22.3056	16.6549	22.4637	6.04002	6.38721	5.77287	6.47245	6.28482	3.98753	10.711	12.0967	15.3851	3.48129	4.76663	4.06393
cant1a	36.06	46.141	48.8939	11.5126	6.15275	15.4218	17.0318	14.6393	24.8817	23.0472	25.3494	18.8554	23.6731	20.5214	1.97169	0.650925	1.01345	2.02985	1.32525	1.03826	4.76878	2.00322	0.973935	11.5503	14.1798	15.9526	18.9081	22.3161	21.0107
dnajc4	36.0052	31.8776	29.7363	28.3305	23.2996	31.3411	11.0422	9.44163	12.7525	10.4551	14.0443	6.5865	9.72715	8.08439	22.8938	23.9775	36.2658	30.4972	20.903	25.929	32.6282	26.8664	30.7876	18.0155	22.6751	23.727	21.6582	29.948	34.1076
scaf4b	35.9963	40.402	39.7762	34.1609	35.1858	51.7626	5.21384	4.48532	12.3077	12.1035	16.2725	5.41143	3.4434	3.6119	4.75105	4.09067	4.29717	3.29455	4.15356	3.49214	5.05005	3.42243	3.67977	6.79507	7.69707	9.5021	4.93291	5.53983	7.03197
smim15	35.9289	40.1778	54.5778	68.28	45.5422	38.4578	22.5422	8.68889	26.0933	30.5644	42.84	29.0222	34.4711	23.7689	27.4533	30.2356	32.4089	31.7333	27.7467	16.24	46.1467	21.4489	30.9644	51.1556	53.5778	81.1289	51.1467	50.8978	48.3867
commd3	35.9276	43.5628	38.8864	31.1029	33.0347	44.5981	16.6053	22.451	35.9348	28.3433	29.0766	11.5502	14.6782	13.9444	27.2488	28.0867	37.8409	27.9151	25.7141	25.7189	35.6543	30.6728	35.4127	31.2745	32.9563	48.7446	35.762	31.2877	30.6411
cyb5d2	35.9253	47.2541	34.5832	70.6751	50.6138	56.3764	16.2922	11.0541	21.5988	25.347	29.5727	14.6934	16.8865	13.349	4.29289	2.62688	4.29485	4.07763	3.25571	2.84214	8.96869	7.38552	3.62688	36.5003	31.9997	52.2609	35.7492	31.1018	35.1618
SAP30L	35.9204	38.0796	36.7093	35.4056	22.2731	16.4167	7.75185	8.51481	13.9093	12.8685	16.762	5.91667	13.6204	11.187	8.11482	5.42963	4.80926	8.77778	8.05556	5.40556	13.6185	6.9963	4.34444	6.57407	6.47593	7.87593	7.96111	5.73704	4.39444
mmaa	35.9066	32.971	33.1852	75.2049	69.8952	80.7147	8.19231	5.60636	21.0651	18.1762	21.1692	12.2308	10.4494	6.40699	5.05573	3.75549	4.27355	3.90816	4.36892	3.15699	5.99058	4.45016	4.24411	24.5259	24.5275	34.7002	16.2261	16.6715	17.2537
rnf144b	35.9047	36.0241	37.5013	37.0084	11.8441	36.1572	5.93727	8.33858	17.7995	20.6182	22.4402	12.1218	10.6252	12.084	2.6147	1.72703	1.76903	2.7853	3.66194	2.33386	7.958	2.96247	3.05197	6.7853	10.5165	12.3344	12.7874	12.3228	14.79
ddo	35.8879	26.3658	46.7901	44.7445	21.2578	26.2616	13.7298	9.7018	13.5717	21.6914	20.4207	15.4444	10.9782	9.39601	10.5821	8.60494	10.2683	11.886	10.3979	8.81576	13.3466	9.79297	10.3514	34.7018	44.416	57.405	49.6809	43.2464	38.1861
blvra	35.8249	38.5836	40.1965	71.902	57.1681	62.7586	11.6018	6.80019	20.3049	19.585	22.8866	9.08497	10.9598	5.51074	14.8287	13.1895	21.2194	13.697	16.9491	16.0915	22.6527	17.3716	17.6471	21.127	24.6401	36.7554	18.3212	18.5868	19.6951
rragca	35.8146	59.9368	46.8636	31.3053	17.0753	32.698	10.2162	7.28947	11.5093	11.5336	18.651	8.53603	8.24211	7.77571	8.57328	7.40324	10.7571	7.14899	6.06154	9.89231	9.44049	10.4704	7.22105	17.3599	9.27773	22.7036	9.92996	15.1409	18.5664
gng12a	35.7922	23.6364	45.2554	57.3333	43.4632	64.5022	6.35065	5.05195	22.619	15.4329	18.355	13.2944	8.93074	7.68398	9.46753	13.5065	17.1255	11.9004	16.6104	11.4394	18.316	17.184	7.73593	32.9307	22.0736	32.5152	11.2208	11.2381	7.80087
mphosph8	35.7194	41.3551	39.4219	43.2455	22.5064	35.5724	8.81709	10.4855	17.4858	15.7052	20.5745	13.3756	11.6788	10.6612	17.1814	14.9915	20.5199	17.6025	15.7489	18.8733	22.2244	19.3908	15.2934	24.6836	23.746	34.8539	20.9426	20.3295	19.9773
spi1b	35.7187	30.3862	21.8451	21.6138	9.27887	15.0114	6.71789	4.96626	9.13537	10.7122	12.1329	5.80081	10.8451	6.1748	4.02236	2.78577	7.15528	2.77073	5.10976	3.62032	8.88333	7.80406	4.0874	7.41341	5.70569	10.278	6.14146	4.44634	6.29715
tmem86b	35.7108	37.9171	21.8623	105.257	51.5333	159.488	24.3649	35.6175	53.7216	58.2438	76.0307	41.405	37.4318	44.299	0	0.092363	0.603786	0	2.15046	0	0	1.26403	0.899151	62.2167	62.0571	85.0982	79.1994	81.0369	78.8225
nelfa	35.6207	40.4642	40.3677	52.4213	36.6085	62.8374	18.3863	16.1733	34.49	26.4564	32.7204	14.4299	20.8883	19.2806	7.75351	7.9013	11.3151	10.1759	8.32114	10.4449	11.6528	10.2866	11.2224	15.6748	21.4048	24.9043	15.6919	9.97846	12.231
UNG	35.618	1.2458	13.0703	42.5844	0	0	0	0	0	0	0	0	0	0	0	0.301308	2.27602	0	2.67751	4.93174	2.72272	0	0.552377	19.73	19.6123	3.57882	13.7282	10.4268	31.8431
tk1	35.5963	37.2739	89.1969	28.4556	17.8163	23.268	11.0437	11.9044	18.0314	10.7329	11.8689	15.5874	22.2616	16.8668	7.36475	3.41462	5.70902	2.78347	4.01366	5.54645	10.9467	5.16188	6.36271	60.514	75.4717	117.387	235.415	211.895	220.47
asb8	35.5836	41.9117	41.5232	35.6459	26.1803	41.5177	16.6022	17.698	33.2221	24.5158	31.9944	20.9099	18.1589	19.8615	22.9126	15.6571	20.1375	11.4675	18.0325	11.9173	25.3866	16.0028	10.2314	22.5214	25.0084	28.7955	30.717	25.7639	27.9136
rnf7	35.5604	49.2353	66.2477	46.3375	56.1409	60.8854	35.2446	30.4226	66.4458	51.3622	51.2121	22.3344	32.082	34.0062	39.3669	38.7755	57.1827	33.8483	46.1733	44.1966	55.7879	51.3429	45.969	54.4071	56.1269	88.5882	78.3777	84.1525	55.7276
blcap	35.5265	61.822	59.7765	46.8826	26.553	44.2273	16.3902	23.9242	25.6212	31.8068	29.7652	20.4394	21.6705	23.947	45.1629	28.1894	50.9811	35.2803	43.197	39.3598	47.6742	57.3636	37.1439	13.8371	17.9773	18.5568	30.8939	18.3636	12.9735
TMC6	35.5051	23.4696	31.3056	20.8964	5.08818	7.82382	5.77547	5.77658	12.6133	9.95647	10.3257	7.07058	5.9774	4.7336	4.51546	2.63468	4.84786	3.59948	2.19544	3.44368	7.19933	3.75917	4.25435	3.83457	5.04428	5.18458	8.77844	8.47962	8.62116
ap4s1	35.4684	44.5632	50.1368	34.4544	36.9158	48.2895	7.73684	15.3789	27.7491	29.0711	19.8307	8.55965	15.9544	10.9088	18.7386	14.1895	28.5702	12.9684	17.4553	20.0404	24.6544	25.8211	15.2368	19.6439	19.4333	28.3895	16.9281	22.3421	11.5719
foxo3b	35.3541	41.1559	53.4924	51.9814	69.1842	72.0247	10.8718	13.8646	16.7083	17.1134	19.5038	6.10152	6.01001	4.72212	7.40658	8.5	9.27693	4.71687	5.47093	5.64252	7.90562	6.4347	4.69256	8.72212	6.12536	9.06339	7.19018	5.40419	5.63537
ndufb4	35.3441	104.885	52.2556	6.52962	13.0797	43.9943	12.7232	2.26944	2.3818	18.6192	10.6518	15.8643	0.964916	1.52874	0.151422	0.091779	0.302811	0.180433	0.309099	0.154769	0.160036	0.208276	0.45286	102.44	127.111	154.004	154.263	109.821	170.602
KLHL7	35.3391	42.0286	33.8477	15.8929	10.63	12.7316	5.42902	4.38452	13.6608	13.4632	10.4769	3.88389	4.89263	3.29796	3.69289	2.43363	3.90179	3.28298	2.60008	3.55889	5.31794	4.61298	3.38743	7.17228	8.13192	10.3354	9.62131	11.8689	12.6303
hes6	35.3075	33.1658	33.1085	32.7427	25.1593	15.8503	7.96583	7.63317	13.7035	10.4503	19.3447	9.00502	15.8583	10.5196	4.40201	2.36683	2.79297	2.05327	2.56683	2.81005	3.97588	4.73367	3.67186	14.7558	12.6774	23.7678	21.8276	22.3467	19.5528
EGLN3	35.288	14.9768	14.3577	24.8409	87.5816	52.2776	14.3449	11.7305	4.19164	10.4425	7.18583	1.81998	1.36353	0.347271	15.1951	11.2137	16.9559	4.22474	4.4216	2.83972	3.78397	2.3043	4.03717	12.8479	10.6341	14.3821	0.745645	0	1.26132
ZFP36L2	35.1884	69.6405	53.1473	355.549	262.862	330.916	28.1362	16.8456	39.5661	23.289	30.004	30.0823	30.6738	34.403	68.8496	51.3698	73.1077	49.3365	62.175	56.7118	68.1299	67.1671	42.0879	77.3262	73.0903	113.39	28.5645	31.1789	39.6928
c2cd2l	35.167	37.9962	54.4447	65.2909	37.6169	60.3836	6.84927	7.77252	16.1415	17.8952	15.0346	8.17187	8.00745	4.2474	4.08143	4.53292	4.26577	4.35568	2.64241	3.73493	5.35776	4.42342	3.10568	6.82519	8.30232	10.2231	8.57311	7.69889	7.07658
ube2g1b	35.125	26.0833	30.4797	39.3041	44.2404	37.9994	6.01689	3.88514	10.3592	11.1543	11.8514	7.26689	9.38063	6.77646	135.896	114.421	174.533	92.4504	95.2309	108.962	115.635	144.666	121.219	27.0113	27.3716	29.795	10.8209	12.7106	11.518
CCN2	35.061	33.4758	3.70074	4.20882	2.00717	1.25455	4.20494	0.127491	10.0262	10.0359	6.22628	0.220431	0.179645	1.25629	0.156033	0.116051	0.23226	0.524344	0.111138	17.0558	0.1081	2.07261	0	57.4224	0.099748	2.45111	21.4398	19.0107	0.888044
ralb	35.0544	49.8129	40.5986	47.0762	38.9367	52.0347	8.99388	7.91157	12.3531	15.5041	17.9381	10.7612	12.4286	9.50544	18.3177	21.1327	26.5748	16.1517	17.1531	21.2673	26.1401	21.3279	17.8626	10.4401	14.098	18.185	20.7823	19.3265	22.1204
cabp4	35.0109	4.07312	8.1334	6.75889	9.41502	17.0128	2.52767	2.11265	5.02174	3.42293	2.28854	0	2.76087	3.81621	0	0	0	0	0	0	0	0	0	2.83794	10.0375	7.93478	9.62055	9.36759	4.25198
tusc2b	34.9996	30.8969	39.035	58.3209	60.5816	90.9252	10.9049	11.5975	15.3975	15.5406	19.2034	11.866	13.4256	8.74841	12.7763	13.0744	13.95	13.1598	11.587	13.1254	11.1097	12.3575	14.074	26.927	34.4228	44.3985	22.5872	21.2273	17.7357
ahsa1a	34.9838	36.6676	37.7458	1346.1	2742.92	3848.72	16.3356	13.4255	18.7264	26.2861	30.1093	16.8023	17.7236	14.1037	75.5685	74.906	82.0898	64.575	62.0444	58.9273	81.9995	75.2782	63.8651	1028.85	1029.35	1507.3	33.3565	38.3676	27.0042
slc25a48	34.9603	19.4054	38.4084	30.0109	12.9763	32.4973	12.733	8.1087	3.16777	3.31094	3.3935	1.63065	0.752306	1.02371	0	0.118577	0	0.517347	0.122969	0.262626	0.630654	0.108915	0.111111	4.24682	3.15151	6.28612	5.93632	8.07422	8.72661
dynll1	34.9589	28.8167	28.3416	25.2089	21.2349	34.9615	28.9595	25.8249	40.2516	26.6425	51.3988	29.8176	41.5824	44.6076	138.234	106.612	159.789	132.924	157.528	125.269	217.385	177.302	170.217	139.006	172.802	221.182	363.691	338.269	297.029
taf10	34.9551	38.5704	45.5761	50.9949	38.3151	27.2662	17.3987	14.0304	21.5393	24.4861	20.4581	21.9655	20.5194	27.2223	42.9518	33.6256	43.2839	27.9174	40.6461	36.4937	43.0781	44.932	39.6152	25.6203	20.8162	43.1638	42.0733	34.2638	30.6821
carhsp1	34.896	79.5515	200.292	174.585	158.741	272.275	17.7438	31.5606	73.6591	87.9394	104.275	35.0399	21.1143	23.5399	14.8822	14.7603	6.48278	4.57369	10.2383	5.57714	13.5351	4.12879	10.2645	65.8485	47.5235	128.992	27.0083	12.6061	33.8561
cript	34.8884	40.8722	41.5412	39.4251	24.3818	39.0395	7.04569	6.0268	10.6025	11.6168	10.9028	8.42126	7.05552	6.27871	3.98359	2.59867	4.63753	4.64174	3.87182	2.98161	4.75587	3.45879	4.56846	24.339	34.2501	36.3839	22.1067	20.0869	21.8613
mrpl35	34.8627	23.079	39.048	32.7813	46.3281	64.0286	11.9684	15.387	25.2388	28.4642	23.5358	13.3572	23.0693	15.825	30.1009	22.7442	25.8177	27.1871	32.3864	23.1683	39.4745	39.5778	28.4508	19.7874	28.1009	47.9405	51.593	36.1452	35.062
rtraf	34.8231	53.0353	13.5274	12.8857	46.0512	16.9392	16.2434	14.2691	23.2593	24.5063	24.453	23.8226	15.195	17.322	22.2886	20.1873	22.3014	19.6807	18.9542	18.3744	11.811	21.4727	10.9824	31.2172	32.4084	18.5356	11.6222	20.8309	38.8123
dynll1	34.7442	49.9264	49.5717	54.9147	40.5581	64.093	10.7597	25.3159	27.8605	42.564	40.688	37.1202	44.8663	30.4787	158.616	117.767	155.045	165.011	140.779	116.453	199.392	159.041	152.174	183.422	206.752	294.694	250.229	222.587	233.878
tnfaip1	34.7413	38.0118	38.8258	25.9622	29.1153	35.5533	16.7093	13.3578	27.7408	27.0355	32.5456	15.8002	13.6188	12.7745	15.6499	11.0081	14.2566	11.7745	12.3446	13.7096	19.3449	14.2982	10.37	26.97	21.8965	32.2682	12.9299	10.7612	15.996
ormdl1	34.7271	33.9115	32.2835	44.7292	35.3625	44.215	8.49104	14.4521	14.6027	18.844	19.2624	12.0643	10.8514	14.7671	14.7956	10.843	14.7682	11.4162	10.9737	12.1697	12.0432	11.5353	13.3793	15.725	12.746	19.1844	15.8493	16.7007	13.1549
tmem147	34.7076	53.7873	44.3855	51.9903	41.7147	39.5941	24.5194	23.1426	32.8732	33.8308	32.3037	28.5833	25.3221	21.1053	22.9315	13.3896	16.1207	15.4581	18.4192	15.8615	20.2224	15.6651	16.6861	37.0317	31.0961	48.1559	48.4407	48.1938	44.102
dcps	34.7061	35.2228	49.0457	30.4525	23.6643	29.588	7.867	9.234	16.2733	15.8496	16.6444	10.7838	12.0165	7.21709	9.93601	10.931	11.9959	9.22692	8.99817	9.52605	13.0032	12.3677	10.1915	9.93007	7.88734	10.8734	11.5882	12.1915	11.6677
serhl	34.693	38.5828	37.9579	78.2541	37.0909	60.3639	3.02088	4.9652	11.9853	18.1671	16.1311	8.25947	6.58005	6.8167	11.4896	6.20224	8.10789	7.46829	8.79196	7.84493	11.0681	9.36311	8.18562	18.2158	23.6891	26.9404	11.4184	14.0951	12.0205
TIPARP	34.6352	53.5354	34.1308	29.2299	55.6422	67.6395	6.04724	7.39501	6.979	7.00612	11.7626	4.30971	5.74759	4.31365	9.07597	8.25897	10.4035	5.20647	4.30825	3.68927	6.94095	4.21916	4.60236	9.90267	8.27821	10.9078	4.11155	5.26247	2.96019
ywhah	34.5703	50.7499	65.7623	43.9924	15.8285	34.0336	8.9159	10.7727	17.0939	27.4216	23.592	21.8871	18.9875	18.312	8.84373	10.9192	13.9086	10.2447	7.77265	11.2127	12.9837	13.1427	12.8291	35.1036	28.548	48.6262	43.0657	33.5193	34.6593
wasf2	34.5445	30.4935	36.8142	35.5581	49.6561	46.169	11.2665	10.8245	14.6645	23.2452	20.5623	13.871	16.5465	9.28	11.969	10.1074	15.4406	9.98387	10.1387	11.2326	18.4329	15.9439	12.191	25.4697	21.81	29.7139	16.9523	16.2277	16.7806
pdzd11	34.5442	39.4757	42.5164	37.7291	29.627	39.0159	14.4134	15.9134	27.3879	31.0137	27.8375	19.6077	23.4222	20.6115	31.9404	23.853	32.9263	23.7996	26.8563	23.8406	41.5417	31.5996	24.2951	42.5274	47.1998	53.7305	33.4816	32.1622	36.9869
hig1a	34.542	44.8801	24.0828	31.6119	24.2046	40.7713	7.88381	9.56489	13.7627	14.5253	14.8121	7.20025	12.9067	6.17923	9.822	11.4611	23.9468	7.97033	14.7515	9.69839	18.7713	17.5105	11.8875	9.41533	5.87515	11.0284	11.6576	8.23239	13.9073
wbp1	34.5322	46.3871	40.7766	39.4166	32.3083	51.7953	7.42625	7.92053	20.1017	18.7869	23.8579	12.7893	10.1884	10.4527	32.5051	36.1222	41.0819	32.3654	34.3107	33.5427	34.8657	42.5069	30.1126	9.13727	7.5015	16.2775	13.3763	10.1866	8.21674
gxylt2	34.5279	41.7939	44.7939	21.0729	24.6176	23.7016	10.1622	8.45536	13.8028	13.3974	12.1629	6.51042	4.92411	5.03795	6.82217	5.07664	5.39583	4.51935	4.8192	4.56051	4.26562	6.40228	3.04539	9.62388	6.01414	15.8832	13.1019	15.3891	18.0379
ntf2	34.524	51.1121	68.1921	43.5313	38.0422	48.8028	13.9869	10.2052	19.9927	19.7016	27.8894	25.4993	23.0713	21.4483	8.05822	9.57205	14.0859	8.92431	8.24309	6.10044	25.0364	10.7103	8.14702	30.5633	31.0087	43.9243	66.9039	67.1106	68.9068
nrbf2b	34.5192	29.1654	39.3662	37.5697	36.847	40.2845	5.70523	6.7902	16.6647	11.2386	16.332	5.60784	8.28366	6.57451	8.83006	6.31765	8.78458	4.71329	8.21307	8.97516	9.82026	8.83137	9.38105	13.6172	7.67647	15.2281	3.78562	5.4268	5.2085
crk	34.4989	44.3773	40.3642	42.2332	63.1697	68.2057	9.66208	7.19551	11.4934	12.9471	15.623	9.03234	7.7789	7.74704	4.59063	4.51557	4.90345	3.55395	3.06807	3.78156	6.16655	7.2742	3.08086	13.9925	13.9138	16.2923	8.30751	4.99421	6.22375
ptges3b	34.4859	45.2014	61.9862	41.3143	46.0737	37.6045	5.09954	4.82253	7.55501	10.8517	10.7475	8.16765	10.7187	7.05468	6.57105	6.52358	8.704	5.79488	6.44401	5.43484	12.0802	6.26948	5.45645	12.6549	14.7616	23.3851	31.9221	35.4096	33.0671
sdr39u1	34.4595	27.856	33.0298	56.8267	52.4976	44.6094	28.7358	31.3965	47.2793	47.354	52.8848	27.1045	33.7324	30.8418	58.0137	37.4673	63.5337	44.106	45.9185	42.8267	58.5181	64.1899	49.1572	46.4771	55.417	70.9609	44.8262	38.8364	30.1987
cln5	34.3805	64.8484	41.5602	60.3469	76.7852	68.1547	11.1422	11.5977	12.0234	20.0664	21.4969	12.3602	13.3398	10.832	13.2234	11.6188	9.04688	8.33437	10.0094	7.95625	12.5	10.8742	7.07656	16.1883	18.7117	23.4203	9.52812	14.2594	16.3742
dennd10	34.3782	54.411	43.4246	32.2184	19.2887	13.3294	8.65792	6.79756	12.7095	10.7985	14.664	6.22727	7.70806	6.41237	2.35801	1.4433	2.07966	1.41612	1.62793	2.26429	1.62605	3.55857	1.8238	7.94424	11.9166	10.8533	16.0886	14.7882	14.3805
aoc1	34.3577	38.5759	64.4477	103.913	68.4789	67.5173	3.44266	4.77445	17.7626	14.2331	19.3183	6.91653	6.25801	4.32905	0	0	0	0	0.229342	0	0	0	0	2.60413	3.23524	9.01181	2.93761	2.21796	2.59022
hnrnpub	34.3172	35.0569	48.2135	31.1093	23.4293	29.9064	13.0429	15.2886	17.3122	27.1816	27.8013	16.5173	16.7905	14.9871	18.8127	24.0328	24.8986	18.7486	22.3673	24.3116	30.6123	31.9529	19.9262	16.2147	17.7151	24.5489	24.8682	22.114	22.2528
btc	34.253	15.8052	15.1276	0	0	0	0	1.08597	0	0	0	0	0	1.35732	2.0641	0	1.20355	1.62715	1.61334	1.39756	1.8616	10.7735	1.0539	0	1.54014	10.5617	15.6166	21.9633	5.03977
vps37c	34.2088	48.3458	55.7757	33.2223	41.506	29.8837	6.80956	7.59681	11.7275	12.1179	17.2351	7.73546	7.44462	5.19602	9.20359	10.0096	7.43904	4.15379	6.91235	5.17291	5.651	7.07251	4.55219	10.7713	12.639	16.7398	8.07649	5.66853	9.48327
il2rgamma	34.1953	37.5007	30.3776	27.0112	16.6734	33.5004	7.74475	8.24825	10.313	9.29816	9.53809	8.88748	9.72461	6.21629	12.3665	7.28109	9.28109	5.40193	5.97898	6.42688	15.037	9.01248	3.2465	9.55188	9.98686	10.6204	7.4479	7.91068	7.17951
ccser2b	34.1134	49.8294	34.5516	60.3531	53.952	46.9112	8.83907	6.75634	24.5359	23.1389	28.1775	8.47735	11.6147	8.10145	1.41697	1.76027	1.734	1.06975	1.15187	1.13647	2.516	1.73641	1.2183	5.60719	4.50604	8.36202	1.45922	2.1715	1.67874
pik3c2b	34.0944	2.51932	38.0803	1.29291	0.341426	0.789424	0.884649	0.32309	0.768553	16.4639	1.29565	0.415447	0.341636	0.24292	0.167271	0.13301	0.207322	0.151811	0	0.182519	0.188753	0.122256	0.139848	0.111885	0.156246	0.361463	0.128374	0.29856	0.104706
slc25a34	34.0699	53.8306	38.3592	59.8931	32.8404	72.9901	5.06593	7.66975	22.48	18.2311	27.7542	10.3389	18.1953	12.4418	0.115835	0.343808	1.36106	0.703635	2.03081	0.719039	0.926063	1.3703	1.12261	5.67036	6.5496	5.54036	4.32348	4.77511	4.34196
sh3d21	34.001	45.0895	26.6001	20.4161	4.18626	8.17173	3.35931	2.48811	7.04624	9.14861	10.7008	5.41083	6.08983	4.35403	1.98217	1.06737	2.09379	2.52048	1.91149	0.992734	4.53369	2.21598	1.28071	13.2206	15.8329	14.8867	22.0053	17.6658	16.3679
kgd4	33.9889	34.9494	34.6354	36.8508	31.7339	46.442	7.43094	19.4899	21.0147	14.9788	18.5157	9.97238	14.1455	15.7587	41.7366	30.4291	40.9576	28.6041	40.9724	25.7376	38.1077	49.6547	36.4549	42.9982	36.4549	62.1722	65.2781	63.279	44.5746
masp2	33.942	25.2116	25.3634	24.0985	15.5663	25.3213	17.4053	259.712	11.4719	12.2981	12.5585	251.185	266.699	252.815	0	0	0	0	0.525945	0	0	0	0.077472	26.9135	34.0088	34.3216	29.8315	22.1379	32.8067
nr1d4b	33.9156	33.5674	40.0383	43.3479	33.7836	95.5482	13.4689	8.21063	21.9481	17.9358	23.8589	11.0522	7.19753	6.08289	32.971	17.6357	33.1613	28.3764	22.5802	28.5994	10.7753	13.5044	8.66717	5.02268	4.85009	5.26304	2.90476	2.34467	2.63694
bag2	33.8603	34.3714	13.2095	841.024	1290.14	1936.22	9.64921	6.96667	14.8849	26.4206	27.527	17.6794	12.9667	11.5032	154.379	148.587	167.448	181.786	157.646	151.548	180.366	185.568	151.863	557.934	650.278	855.987	43.1365	31.181	27.8238
SLC25A29	33.8505	22.5096	31.7757	23.152	29.3056	36.0899	6.35264	5.18808	8.20235	12.5709	9.23508	2.72343	1.77582	0.9555	1.00252	1.90932	2.50462	1.3644	0.936188	1.90445	2.68598	1.45088	1.34593	5.63224	5.35516	6.12797	3.10243	8.06141	10.8774
clec14a	33.8363	39.0702	31.2064	25.9774	26.5071	48.6717	4.49206	4.77778	10.2581	13.543	11.8747	4.70259	4.33166	5.68337	21.0075	19.7895	27.8087	15.0326	14.4219	20.7836	18.1512	29.142	12.4085	18.2698	14.5155	24.2289	14.9382	10.7268	17.0368
JMY	33.8263	23.8733	25.6312	94.4938	44.6392	81.4979	9.56457	10.1165	31.5262	21.9858	35.095	16.3001	17.8436	15.3279	4.42783	4.16851	5.64952	2.74033	4.18646	4.02728	3.17938	3.46927	3.94233	10.3146	11.0739	17.0936	11.1267	10.4479	9.9703
ndufs5	33.8131	55.9459	54.3874	59.3018	50.5676	44.1914	18.4122	24.4865	29.0946	42.8311	33.9032	20.4009	27.3356	27.6509	88.4887	69.2185	120.018	62.0946	105.291	73.4538	108.072	84.9865	118.333	61.0856	69.8401	93.4077	87.286	92.4786	80.5586
mmd2a	33.8	24.6594	20.4471	13.772	5.21296	28.1576	9.23504	4.00427	16.5989	13.702	20.5183	6.55564	2.8896	4.34003	0	0	0	0	0	0	0	0	0	13.844	31.3477	21.3244	14.4926	13.7168	15.5626
nos1apa	33.7837	44.1112	53.1417	53.5278	46.3645	57.1527	9.73575	10.4809	18.6175	20.7417	24.2535	9.04497	7.64582	8.24537	1.72576	2.44116	3.71244	1.65026	2.67839	1.01443	3.95152	2.75574	1.36713	5.0396	7.70651	7.83827	5.94745	5.17543	5.31051
zfand1	33.7243	1.88482	0	23.7861	61.6288	15.491	0	0	14.2899	14.4218	16.6908	0	0	11.8009	14.4917	0	0	13.1403	0	0	0	13.7334	0	28.7597	0	0	0	0	0
nqo1	33.7096	53.6346	55.0165	98.2194	39.3245	70.4628	56.0723	40.6729	32.0952	36.3803	40.7021	43.2133	61.7088	57.734	54.7559	16.5202	29.6186	48.6824	31.6559	22.5511	126.149	27.4872	33.7457	47.4926	42.7303	55.625	70.6745	68.9287	77.2761
pop5	33.7077	41.8308	41.2787	61.3021	66.5683	68.5906	13.8384	14.3482	25.6197	34.4474	38.039	17.3069	22.5738	17.4685	20.9984	20.8438	19.8227	17.6394	12.7701	16.7831	24.5607	23.6047	21.7288	46.7495	46.9393	53.9523	35.3698	41.8791	41.2733
tardbpb	33.5135	33.1722	52.2972	19.9749	23.8105	106.852	0	0	0	0	20.8622	26.2666	0	0	0	0	0	0	0	0	0	0	0	0	0	0	0	0	0
bcl6b	33.4598	0.231457	22.9712	2.08495	0.298036	1.5267	4.15834	0.882681	11.5506	0.997773	16.435	0.44104	1.3847	0	5.23976	4.36132	6.14815	15.4682	0.936513	17.1213	19.1731	18.611	10.8999	19.2205	1.4143	19.6507	3.39378	0	0.91954
trim105	33.4433	42.7556	31.6858	21.957	20.7913	34.7585	16.6441	14.5951	21.7275	23.1578	26.1785	19.7761	20.1427	12.5477	7.9833	8.82573	10.9133	7.69625	8.66866	8.89439	14.23	9.92413	10.5798	17.3233	10.7307	18.325	14.8457	18.0641	9.67953
ru1c	33.4261	51.2048	46.5318	26.8852	35.2374	45.7209	7.25929	7.93972	12.4368	9.59785	9.47812	11.4756	10.4657	11.7547	25.3749	21.9166	30.2279	21.6792	21.777	22.5937	36.3889	30.4744	25.0983	21.9942	24.73	33.1073	26.2147	24.6532	23.2106
PPP2CA	33.4148	59.0387	41.7459	40.3474	42.3116	29.7727	7.11541	7.17661	11.2703	11.3528	13.128	6.55345	7.68435	9.82262	14.8555	18.7332	17.335	10.651	10.1305	12.983	14.4355	17.3096	9.84353	19.0349	18.4996	30.8428	18.7808	16.5747	13.9481
ciao1	33.4124	30.6667	48.016	34.1722	24.0501	18.9459	11.2793	10.4099	21.6642	20.1191	18.2783	18.2242	19.4925	14.8659	18.0012	15.2007	16.292	17.0741	20.0811	16.5906	27.3704	21.5305	20.2297	17.4184	14.6296	20.5015	33.86	49.8669	36.8393
HEATR5B	33.4044	41.0011	30.2145	38.3061	33.5104	44.9358	5.11988	5.67157	20.5766	19.8226	22.2397	8.07825	7.42261	5.31511	2.27511	1.57305	2.49594	1.37023	2.05177	1.80006	3.18354	1.96443	1.18061	3.24145	3.2313	4.75742	3.6263	2.94819	2.98309
ubald1b	33.3883	30.4426	41.3197	44.8965	25.5973	36.4559	22.1875	18.6557	24.5553	31.1701	28.4898	22.54	18.2387	15.9242	9.98668	7.96619	10.9887	8.42623	10.3986	6.92521	4.85041	11.9252	5.07377	42.1547	45.3837	51.0615	49.2131	41.7264	43.0026
mrps28	33.3618	46.4326	29.4845	24.0078	33.2772	35.1908	19.3402	17.0432	21.2694	28.7763	25.8238	19.3178	24.0553	17.9611	21.9421	17.5743	25.9257	20.9698	19.0535	20.5915	21.0146	22.4384	14.9585	34.2214	44.2263	48.4712	27.4905	34.0343	28.3411
cfap20	33.2702	111.055	50.6402	86.2001	47.1742	54.5783	9.46591	11.673	14.3965	18.2001	20.7809	11.1761	13.976	10.1856	10.7494	11.2443	14.4659	9.51326	11.1288	8.01641	10.803	13.3359	8.79924	49.3996	61.3182	59.798	61.8516	47.4116	47.7753
atg101	33.2227	28.5642	26.1828	60.6728	55.5275	50.7462	10.1293	8.96568	20.1476	17.8292	12.079	12.3567	15.1061	10.755	12.6935	11.1931	15.352	11.573	12.6879	12.7717	11.1421	19.5108	11.0335	40.4174	31.2187	52.2075	14.3152	21.2306	16.1173
rnf128a	33.2173	35.9778	36.1967	46.1807	46.5683	50.5547	12.3967	12.8831	18.4712	15.4041	22.9654	10.7082	10.2642	7.85267	3.41481	3.43292	3.45185	1.7856	2.46255	2.12181	3.57942	2.82634	1.32222	11.3473	13.884	19.884	9.29465	9.84033	8.23951
cox7a2l	33.1989	60.7621	47.959	46.3569	46.1774	47.3703	17.1808	19.9099	30.1371	32.5699	32.1492	18.1653	32.2258	20.0054	40.793	36.5222	53.0175	29.453	32.5309	29.2742	47.6922	47.8468	39.0511	30.5833	26.6882	57.3689	44.8105	39.6747	42.0403
rragca	33.1878	39.8284	30.0662	28.1601	18.823	25.6259	6.39916	9.31096	12.087	16.2956	13.5334	8.75677	11.7471	6.11198	11.1294	10.8989	11.5455	8.94822	8.65623	9.68633	11.0915	13.6177	9.25527	11.3079	8.92474	16.2655	11.8712	12.6514	9.45575
zgc:162608	33.1862	7.60445	12.5763	171.309	42.9203	192.286	162.961	228.86	883.785	575.782	778.199	722.381	762.484	680.512	0.958893	0.855705	1.72483	0.362416	28.711	1.55285	4.88255	34.9375	33.5948	86.6837	86.4891	104.196	11.7693	10.8356	8.37668
mocs2	33.1649	33.1462	33.886	19.2624	19.9075	14.2165	13.3548	14.5735	14.9161	16.6688	16.9849	17.757	13.5914	13.8753	27.1613	15.2903	21.91	15.4108	19.7355	21.2301	21.3914	28.0559	19.572	19.0258	24.0495	28.0172	17.5247	17.4774	17.7806
fnbp4	33.0291	52.0081	42.5616	56.137	43.9705	57.8603	5.75087	3.35821	13.7957	14.0214	17.9692	6.60591	7.81042	6.19562	12.3395	13.9405	16.0764	14.3342	15.9952	16.4533	23.3625	20.8447	16.1269	14.57	13.0675	17.8812	9.90791	10.7783	8.71102
smim13	33.0037	20.8277	25.4457	34.8352	27.6704	28.3708	15.4345	7.10861	22.9888	17.7341	10.4082	8.78277	10.4345	12.7753	6.8427	6.94757	6.11236	5.26966	7.05618	4.50562	13.8727	13.4682	10.3296	12.8727	10.4007	8.41198	10.2022	5.71161	7.83146
ihhb	33	76.8776	60.669	79.4755	51.3479	164.969	9.65442	6.67457	16.3077	20.4143	29.0968	8.65719	12.5237	7.17141	0	0	0	0	1.22038	0	0	0.236971	0	24.872	27.3187	32.7591	13.0703	13.8432	15.9305
CARD10	32.9869	17.7228	14.5865	17.8714	10.6519	24.3087	0	0.069316	19.4449	0.123231	27.7967	0	0.617581	0.31313	0	0	0	0	0	0	0	0	0	0	10.6919	0	0	0	0
nfil3-5	32.984	33.6295	29.6697	88.862	67.2968	170.464	7.02567	7.27989	16.3841	15.3868	18.6235	15.8717	17.5513	16.2316	21.9094	6.83696	16.7249	24.8037	25.1187	22.1437	17.8469	12.0891	7.75966	33.5075	31.606	36.8285	17.4903	18.6036	15.5157
plpp2a	32.9813	47.7629	43.9995	40.7057	21.6562	44.8135	6.16612	6.9505	11.9417	12.1078	17.3157	6.55225	7.13751	7.9692	1.66557	0.788779	0.951595	1.59021	2.63806	1.43894	4.74037	1.62486	0.443344	6.73047	4.35093	9.66447	5.90539	6.70517	4.75798
prelid1a	32.9368	40.2516	41.5	30.862	29.0649	24.7814	13.0558	14.4072	20.702	14.9984	15.0322	17.4568	14.2838	13.0936	5.58176	7.78381	10.6541	6.58962	5.79088	9.78931	5.67453	5.58019	5.51966	21.4984	21.2673	28.0825	25.3428	22.889	17.4151
zfp36l1b	32.9139	22.0182	28.8308	34.3337	12.0044	29.3224	13.8862	18.5098	39.1743	42.0751	42.5419	26.6776	24.4974	22.8125	8.61488	10.0649	15.1663	6.57695	12.4435	7.63603	9.52079	11.7907	8.22392	44.6689	61.55	62.515	36.2888	36.2939	36.5346
abhd10b	32.8929	49.2428	42.1731	46.6192	19.7861	36.0066	13.6192	12.0851	30.361	30.3151	25.832	15.4263	24.1706	19.3078	53.6258	40.0961	56.4938	41.6754	54.255	50.2803	65.2205	61.6684	57.4391	12.2722	17.3966	26.2792	29.4105	22.3962	21.8771
igbp1	32.8791	41.5231	38.2956	57.6872	45.1864	59.6381	5.61209	9.1864	16.6331	11.9337	20.7406	8.35097	15.1872	8.97061	17.5038	11.0428	15.5987	10.2796	11.9463	10.9538	15.8741	16.5777	12.3871	18.9555	18.8262	29.1667	16.7641	22.1721	19.6612
mri1	32.8168	28.6525	45.8244	45.8931	34.1347	39.1781	9.76177	14.4157	25.6539	28.1637	20.2604	16.4044	14.4915	15.3583	7.47128	10.8385	10.4269	8.17467	7.3936	8.46328	22.5863	15.6888	9.3338	11.4544	7.07957	18.581	15.0848	10.2086	8.25659
TMEM50B	32.8122	34.0837	50.5777	45.1938	31.724	41.8115	10.0256	11.4201	10.2021	13.871	13.764	7.57014	7.62142	5.59879	2.15234	2.28507	4.9457	4.03318	3.89744	3.30468	4.65762	4.35294	2.48718	14.5747	12.1765	15.7014	20.3424	16.9412	22.3446
gng12a	32.7856	32.7809	35.4344	34.3609	29.1303	33.5093	8.58463	8.52336	17.6604	17.893	17.6822	9.42108	12.4528	13.3006	4.61475	3.01038	4.94393	3.6947	4.11475	4.0675	2.9865	4.81828	3.54621	11.0457	12.2544	11.7342	17.3084	13.972	16.9128
epsti1	32.7542	12.8688	15.531	12.5072	9.71083	13.6243	1.7141	2.83094	1.82702	1.38838	1.1312	1.43342	1.95627	1.99021	7.73695	12.8097	13.0108	10.8489	8.1064	7.57768	11.049	13.2174	8.76958	8.71541	9.52154	8.48564	7.3923	9.50522	9.18864
FOXO1	32.7229	31.1197	35.5086	52.4581	84.6381	74.9718	29.535	21.4449	43.8562	56.7357	56.9081	12.419	11.5305	10.0505	1.68289	2.89172	2.77161	1.92266	3.55414	1.8899	3.14013	3.0455	1.75842	11.0068	10	11.4172	6.9222	8.21156	9.08599
bag1	32.6767	41.4077	35.9274	51.9456	36.5312	47.8983	6.41956	7.44558	10.7532	14.6522	19.0749	9.1597	15.6475	11.3088	23.6534	15.1293	22.7461	19.8427	12.9708	20.5252	21.8336	22.0497	23.2776	12.694	9.27839	14.8935	11.1751	11.2441	11.6041
itm2cb	32.6627	0.172823	3.10393	2.63955	15.8635	29.9809	0.229542	0	14.6826	4.75235	11.8218	12.013	11.8053	3.47122	1.18216	0.397167	1.42032	0.538868	1.66397	0.053081	2.29413	0.845248	1.55886	0.050035	10.5552	0.736552	1.26728	2.0975	0.804263
ihha	32.6437	35.0887	46.5115	15.4941	14.3294	21.677	9.11718	7.89469	15.555	17.0348	20.2708	9.21615	8.76643	8.73159	0.611243	0	0	0	0	0	0.235946	0.418844	0.235154	3.90657	5.16785	4.11006	10.8282	11.1021	7.59858
TOMM7	32.5952	44.8036	52.4583	49.5952	37.2917	59.3095	22.9583	24.7321	31.7738	19.5536	30.6726	25.8155	42.125	24.5476	57.9464	37.4464	58.3869	49.2917	38.1131	49.1071	56.631	51.6667	52.8571	86.744	99.5774	150.464	143.994	119.196	113.964
mgat1a	32.5606	38.2202	30.3662	42.1195	33.0054	48.7593	7.30695	5.3301	11.5875	15.8718	15.5226	9.82822	10.7517	8.35326	3.62143	2.15832	3.007	3.59128	2.70544	3.48734	6.17717	4.2574	2.62089	23.4992	24.1885	34.8568	13.28	16.993	12.5848
jtb	32.5453	38.9275	34.2319	59.0616	66.1594	48.6757	15.0625	6.55706	28.0924	35.433	21.0435	18.0362	15.163	14.9221	7.16576	7.69928	6.18116	8.52174	9.76268	9.37862	16.6748	7.95833	12.4583	42.2355	42.5453	63.0725	14.4583	14.75	12.8551
COA3	32.5276	39.9252	29.1122	27.7854	30.3425	29.6949	13.1604	8.61122	12.6309	13.4675	15.1831	16.2195	9.15059	9.96654	36.3425	29.4567	44.061	24.7421	37.4774	28.2884	41.5256	31.6171	35.0364	23.9085	37.3396	45.3898	46.5699	45.9459	51.8435
U7	32.4909	33.1273	13.1818	6	3	7.21818	9.81818	4.58182	4.92727	2	3	7.47273	2.43636	2.29091	2.49091	0	1.74545	0	0	3	2	1	0	8.85455	9.43636	15.2727	12.2727	17.7636	14.9818
MXI1	32.4727	19.9096	16.1694	19.3413	42.4099	18.8117	1.21921	10.0839	1.72254	2.10131	5.25817	1.98734	4.428	1.6181	0.776196	2.04366	2.53982	1.52791	1.36672	2.5114	2.5379	1.53378	0.238876	1.77838	2.05689	3.3081	1.36038	1.17518	1.36757
hspbap1	32.4394	29.6685	30.7576	34.6667	28.4985	32.6673	10.3461	14.2647	19.6722	20.3544	22.2795	10.9839	10.2941	7.91837	7.33905	5.36982	8.10513	8.96259	9.04546	7.85529	8.51843	6.2936	8.94078	23.9283	18.8336	23.0201	8.60606	12.2746	6.5603
mettl5	32.435	34.0446	47.5253	3.10347	3.15817	31.2453	0.874859	12.0274	0	10.3066	14.6252	0	0	10.0329	15.1632	16.1079	17.9391	13.0548	10.58	14.7479	17.5908	16.237	14.3736	4.15182	10.8962	14.0018	16.3401	14.2536	14.0298
acin1b	32.3916	52.2134	46.7214	37.0451	30.5694	37.8931	8.61366	10.2118	17.656	19.5254	25.102	10.318	11.6045	9.19813	29.6338	27.7815	29.9915	25.0174	28.0189	23.219	35.7937	30.0965	22.4925	13.4606	12.0036	16.5436	9.50413	12.5906	15.1322
rtf2	32.3829	39.4618	38.529	47.9735	35.3854	41.2739	9.69145	8.27699	15.8503	12.53	11.4394	11.6456	7.9389	7.83045	22.8946	22.6894	24.8529	27.5789	27.0967	19.6186	29.5591	32.8136	20.5952	22.6446	22.2118	33.3366	15.2281	10.3447	11.5061
mpzl2b	32.295	42.9317	51.1703	18.277	7.89328	29.2374	4.94724	2.68585	8.19904	5.65228	9.93165	4.67146	3.10312	3.53957	1.29257	0	1.51079	1.19784	0.699041	0.272182	2.92326	0	0	4.69904	5.55276	3.81535	7.44245	9.08273	10.0276
slc7a6os	32.2782	33.3551	29.342	30.7171	25.1184	40.6287	13.9131	12.4397	19.5611	25.9577	28.3075	13.6395	15.3805	11.0307	34.3989	31.6022	45.4055	25.3509	26.8309	29.4266	43.3597	38.8547	32.3582	31.8747	33.8862	47.7817	26.8547	22.8363	20.7302
fadd	32.2772	34.5028	43.8627	28.539	32.3997	41.883	6.46657	4.20752	7.71866	7.50279	6.5766	3.83426	8.1156	6.80501	1.15599	2.72284	2.0195	2.25348	3.7298	1.92061	5.52785	2.95961	3.18106	8.69777	12.2298	15.8454	7.1351	8.41086	12.1393
ptger2b	32.2761	29.8606	34.0416	33.4718	30.8255	49.1542	8.79686	8.02955	17.3832	19.012	21.7498	14.157	5.96399	8.72114	0.923361	2.02955	2.05448	1.87904	2.38781	1.11727	2.3832	1.74515	1.53463	10.6168	10.2798	14.7054	8.10434	7.78393	6.96399
TXNL1	32.1927	28.4822	1.7582	0.142576	2.45853	2.74891	0	0	0	0	0.393018	0	0	0	0.495926	0	0.236033	0	0	0	0	0	0	2.45452	0	0	0.006547	0.431681	0
trabd	32.1239	36.5663	33.625	72.2998	92.9023	53.0989	10.1726	12.9477	22.6114	28.0397	29.145	17.2483	15.1102	13.1077	4.61192	4.14699	6.78396	5.02032	5.2912	3.17316	6.1637	3.95991	4.52673	20.1548	17.3758	22.3015	6.76225	7.77617	8.92984
tmem70	32.1238	30.6821	30.9622	28.4722	11.9507	20.9465	3.70934	6.98426	10.8321	8.19622	8.57922	5.23924	7.26023	6.8384	15.7461	19.5278	26.7303	20.4848	24.3012	20.4045	17.2193	23.2613	21.3578	13.9622	4.55719	10.3263	14.0084	15.9161	16.0115
rprd2a	32.0997	38.647	33.1832	27.3849	21.5626	32.4841	3.6658	5.69188	19.0875	19.6368	24.8696	5.36116	7.33565	5.95333	8.7171	7.91449	11.1339	7.22957	9.48667	11.2014	14.7951	12.0345	6.94522	6.21073	4.86232	8.08725	5.25101	4.06435	5.32522
adma	32.0906	30.9543	26.7529	20.0985	29.3228	33.2454	4.43536	4.72471	15.5163	14.3439	11.8197	9.52946	10.8496	6.13149	21.303	24.5295	40.3843	20.482	22.6407	24.314	22.5796	25.8505	16.4767	10.5884	6.89534	17.6878	17.996	15.6649	17.9112
mrpl42	32.0734	52.6052	33.1068	26.9922	39.9597	32.7293	4.16609	10.1617	7.29119	21.1317	11.9894	11.5614	16.4561	11.5702	20.0867	10.6218	17.4795	17.2641	13.2086	15.0615	21.1111	22.3698	16.4824	26.7524	26.5575	35.3054	25.9194	25.461	25.8099
zbed4	32.0374	32.7975	32.7944	46.4532	39.5893	45.999	6.54389	7.0243	12.419	11.3976	13.3386	6.19122	7.40387	7.85031	4.51071	2.95742	3.71578	2.99478	2.5175	2.41771	4.96708	5.5384	3.29441	7.36102	7.48328	10.7576	6.75653	4.88323	4.91889
ist1	32.0276	31.2225	28.4356	38.1223	43.9565	33.2234	17.3369	11.552	23.8656	24.6248	34.0411	16.4022	19.9835	14.2411	24.2312	16.8545	28.2009	20.7498	19.3935	16.609	28.0023	25.9796	18.4522	21.632	23.2298	30.1386	19.1103	19.763	18.3694
imp3	32.0161	32.8592	43.3967	47.3981	62.8894	65.5478	7.99269	8.35575	18.9128	23.9873	24.6296	13.8372	14.04	17.385	32.7865	35.7359	42.521	31.1014	24.8626	24.6589	34.0775	36.7407	39.8163	43.3109	47.7636	58.1628	36.8923	34.2222	37.886
mogs	31.924	29.1989	37.5143	89.073	120.333	60.7435	13.3272	14.6989	34.9584	57.2059	65.6464	18.6734	15.6244	15.3379	3.82482	3.80344	2.77732	5.36936	4.50831	2.47803	5.55018	4.19418	2.43319	67.274	72.6614	79.807	25.5635	22.7093	24.4786
ZDHHC15	31.9197	30.6488	35.6069	40.2219	46.9923	33.1641	10.3972	9.6002	18.3773	25.931	20.9213	6.46472	11.4387	9.04703	11.3313	6.26278	9.84867	8.67229	6.31902	7.28221	9.79652	11.5174	9.08998	29.296	27.2638	34.3195	26.1421	30.5158	23.6421
ccdc25	31.9035	54.2024	43.6805	68.0617	72.0163	74.1609	5.62482	9.6189	11.65	10.4532	10.9832	8.48272	9.65531	8.4724	14.9657	14.7919	15.7158	13.6983	11.6128	12.5269	12.7216	17.2252	11.9225	39.236	34.8838	49.6445	29.5012	32.4297	29.0689
tnfrsf9a	31.8712	75.6641	48.7082	80.6283	119.62	155.944	10.5195	8.19088	25.2861	30.3482	29.3953	9.74499	19.2515	15.0511	0.400802	0.149299	0.138778	0.299098	0.830661	0.132265	0.413327	0.518537	0.663828	115.721	118.945	167.425	6.25251	6.42736	5.14228
znf395a	31.8277	38.0234	25.5926	75.4733	121.768	117.073	13.6848	13.8061	18.8266	14.3372	16.8145	6.42164	5.51797	4.21212	45.8814	28.8688	47.2015	13.6933	19.5063	14.1355	13.3777	7.16883	6.19048	13.2483	15.4385	21.1177	5.67641	5.0329	6.47532
im:6912630	31.8162	40.5841	33.0592	74.5428	76.8731	63.7352	7.76324	8.57165	16.4315	15.2562	14.9642	8.48287	10.0304	7.74844	8.0846	8.38095	8.71284	5.90431	8.70373	5.0773	10.352	5.16355	6.73871	49.9252	47.0646	65.6394	44.4852	34.9977	29.0935
akirin2	31.8025	41.6449	47.6159	50.3243	58.3904	85.8777	10.7101	6.95109	23.5688	21.9511	25.6413	12.1431	17.4022	17.0996	14.8605	10.5054	20.3614	17.2092	12.192	12.3025	18.3623	21.5924	10.4728	19.433	21.288	30	16.5924	9.31159	11.4058
nop10	31.7848	27.503	27.6468	27.6087	55.7861	19.7066	23.1702	27.655	41.6157	45.3769	44.8851	26.4724	34.0973	31.1826	51.7797	47.0077	54.5633	61.8411	61.1227	71.4237	82.0946	67.1335	68.6368	59.6786	68.2985	99.7173	102.643	111.88	116.798
chchd1	31.6787	46.6939	39.0029	34.741	27.6802	27.8263	10.9682	11.8394	16.1679	16.7106	15.1382	14.4414	12.7467	12.2084	27.2012	31.3849	35.1881	23.657	28.4971	28.246	27.1252	33.9928	33.2894	15.5991	19.7945	28.7323	30.0941	27.0622	28.7974
kiaa0232	31.6609	31.9792	33.344	34.5134	18.9871	28.7312	8.25033	5.54753	14.1923	10.979	14.1553	9.54336	5.99573	5.98949	6.72405	5.90506	7.17981	5.17017	5.98368	5.0184	9.26281	7.15243	4.84286	5.22821	5.76654	7.34746	8.07315	7.76916	6.93014
AGPAT5	31.643	48.2345	38.5628	37.3097	18.7222	32.9891	7.97814	7.50455	14.1138	19.1047	14.2791	8.85792	9.65302	9.20947	3.602	3.21767	7.17304	3.56922	5.58015	4.82149	6.98543	5.3388	5.47814	14.2914	13.4208	26.0219	12.51	13.2081	18.6107
STEAP3	31.6298	30.1151	27.4721	26.7857	18.1512	33.1387	11.167	12.0204	26.9822	27.9389	26.4819	14.8271	15.7239	14.5976	14.6548	14.4063	15.3386	15.7627	14.144	10.2373	20.4681	11.9553	12.8757	16.4116	15.8836	20.4379	19.476	23.4234	19.2538
slc26a1	31.6007	29.963	33.0887	28.2741	9.43226	27.0169	14.0067	10.84	13.5334	8.70677	13.209	8.68761	9.48886	7.36943	0.125223	0	0	0	0	0	0	0	0	4.63503	3.39929	4.32442	7.96702	8.26827	9.85071
nop16	31.5935	50.4931	42.6964	53.0665	47.1531	50.075	8.29778	7.32629	14.6938	21.0348	16.6209	11.4498	13.8648	5.86061	18.5333	20.5121	14.886	11.5153	13.2672	10.792	23.7233	24.1362	7.94931	38.3326	44.9678	45.7196	20.2798	19.6864	23.5998
HLF	31.5427	59.8515	38.2956	9.03312	6.50534	9.19444	7.16453	11.6517	12.0224	13.2222	17.1132	9.38889	17.4744	9.26816	24.9316	13.3953	18.9145	14.4241	17.6795	11.687	18.8985	14.8803	14.239	0.209402	0.270299	0	3.65171	5.71261	5.18803
sec22a	31.5158	39.3344	31.5485	41.5	22.7025	38.4536	7.28798	12.5211	12.3165	18.7743	16.2268	14.4916	13.6034	9.97468	5.78376	7.84599	7.45886	3.827	4.99894	4.66561	7.78587	8.61392	3.73734	18.2584	20.134	25.9304	26.1603	23.6192	23.798
ARHGEF26	31.5114	43.2873	33.4853	39.5036	13.5757	29.3061	6.64679	6.93809	11.679	15.9623	15.1658	9.86919	10.4884	8.3689	0.610271	1.33523	1.30357	0.583452	0.720114	0.369472	1.2893	0.759201	0.754351	8.50585	4.75549	7.93923	8.24793	12.3434	10.2023
COA8	31.5081	42.2265	27.0858	45.2298	52.093	80.4426	29.0299	26.7573	59.5939	42.6812	49.9701	17.0372	38.4612	23.1561	36.4628	36.7629	46.5396	33.407	34.2298	31.3924	33.8819	39.0275	40.1828	51.1861	44.3333	63.534	44.3706	47.3552	37.449
rnasekb	31.4837	31.9346	47.3693	51.9216	71.7647	61.5817	5.99673	6	14.3693	13.3137	20.7582	5.60784	5.26797	7.78431	6.30065	7.6634	7.8464	5.87582	6.61438	4.62418	10.9869	6.11438	3.56863	19.0033	24.0359	23.1895	12.4673	10.8203	19.415
MARCKS	31.4693	44.1545	52.1132	20.7677	14.3172	24.388	14.3514	13.0165	18.3255	19.4127	23.8054	16.7606	14.8184	12.7017	48.2417	43.6816	57.6073	54.9092	56.6333	48.9611	83.2618	85.8844	59.9764	31.7866	29.5873	38.6392	41.4587	32.6014	37.0024
tpra1	31.4617	29.2644	31.9946	47.4783	43.8626	54.6286	11.7888	11.9374	23.4885	26.8761	32.8937	10.9475	5.99797	5.59614	1.06974	0	1.63101	1.0914	1.12322	0.530806	2.5369	1.64455	1.47393	24.172	23.5366	35.568	10.7123	11.3375	6.80873
hnf1ba	31.4368	0.541618	22.5573	2.57412	0	0.010813	0.129303	1.33431	14.822	1.19842	13.2805	1.5852	0	2.27102	0	0	0	0	0	0	0	0	0	0	0	0	0.012795	0	1.52183
cmpk	31.4287	28.2597	39.2248	26.8798	23.8481	20.186	7.02868	7.66822	11.2341	9.51783	14.0039	6.62946	6.65581	7.54419	11.8372	6.19535	7.83101	8.70233	5.55271	5.74108	24.2109	11.1155	5.90698	10.7566	21.1093	15.5	24.4984	11.6015	19.969
chst15	31.4144	39.0291	35.8917	23.2808	11.9417	27.769	8.04887	7.6204	13.0975	15.8629	19.0932	8.3796	9.35516	8.16675	0.119395	0	0.072292	0.119395	0.622166	0.052897	0	0.268766	0.075567	11.132	11.1416	14.8773	9.21713	9.98883	10.7387
zgc:56106	31.4056	47.3835	46.8594	65.6647	51.2942	55.75	18.0924	15.7821	21.1205	30.4518	18.492	13.4177	20.4659	15.0422	111.532	96.3795	117.156	91.0653	92.7008	92.8735	138.46	122.094	106.04	57.6717	69.9307	89.0873	68.993	57.8855	73.0542
rbm14a	31.4003	36.9942	34.0495	51.2741	47.5145	40.3431	5.61004	6.70849	16.8411	19.4074	20.1847	7.9157	7.54312	5.89575	3.56758	3.01635	1.5876	3.27027	3.50905	1.68875	3.5633	3.82179	1.91184	13.1728	9.3395	13.1068	5.88932	4.12679	7.28083
sowahd	31.3886	32.9753	31.9862	15.3363	8.84615	15.4734	14.0069	12.003	17.1657	19.4438	26.5394	8.3787	5.99901	15.0473	0.934911	1.02959	0.849112	0.266272	0.5286	0.295858	1.06608	1.41124	0.534517	13.3383	17.5099	16.716	14.9507	15.4901	10.6538
pi4k2a	31.3237	45.2338	22.38	79.9871	82.952	124.166	19.2509	18.8034	39.86	23.904	31.7212	17.1907	21.1728	17.4585	1.6815	4.0386	4.18759	2.15822	3.53187	1.34247	3.61668	2.78708	2.41388	47.5003	49.8542	68.2971	19.8951	16.8587	19.4516
pigx	31.3119	27.7386	22.1605	27.9225	78.8643	167.669	13.9351	10.8253	15.5696	15.1718	18.2796	11.3296	9.81243	10.0086	12.2507	5.97049	11.7639	6.98604	12.5658	11.3539	9.88551	14.7132	13.1983	28.966	22.6284	42.4073	18.7772	15.519	14.7013
slc31a2	31.2784	32.8463	25.2342	33.0627	20.3793	50.7038	9.61148	11.4617	8.83773	15.19	14.4512	7.38654	11.3569	11.9908	39.7269	31.0515	38.6029	26.3536	30.097	34.6326	32.6075	43.7414	34.9627	31.7441	30.8325	51.0633	23.4518	18.2777	24.6801
cdkl1	31.2281	13.7393	1.2496	0.794723	0	0.441273	1.20584	11.9374	1.94018	20.609	22.3623	10.0709	11.1741	11.5784	0	0.178975	0	0	0	0	0	0	0	0.041136	0	0	1.86447	17.4236	18.9729
maff	31.1981	41.2558	28.9686	119.105	125.901	132.125	4.52621	10.8847	30.7128	31.0587	47.4172	19.3459	10.6226	15.1803	12.3574	7.77149	12.804	6.83648	14.3522	7.81551	18.7086	10.1488	6.28302	50.7621	37.3868	70.9811	5.10063	14.6583	5.87841
FAM53B	31.1843	34.1491	40.9922	14.2129	2.91056	7.09123	6.7579	6.85391	20.8014	21.6118	22.7424	11.2224	11.4496	9.97674	15.1556	9.95408	11.4311	11.2898	14.1449	10.9887	19.1002	17.8181	12.1431	3.62612	6.93381	6.34049	8.45617	11.0996	10.4967
siva1	31.1705	46.6705	37.5407	30.0407	38.3876	38.3488	9.53101	8.38372	14.4264	6.3217	18.7733	7.64729	8.85465	8.64729	37.7868	25.1395	28.1046	26.7423	38.9438	37.1318	46.7868	44.3081	47.1899	32.6802	39.0872	40.2209	22.4729	29.1802	26.0872
anp32a	31.1681	1.82195	33.0243	13.7614	34.6138	30.0278	13.2627	1.08142	2.24418	0.459025	0.30731	0	0	12.7279	0	0.318449	0	0.017362	0.332342	15.7172	0	0	0.344035	1.27273	0.17231	0	27.4693	0	0
ptgesl	31.1624	41.6641	53.8411	51.9931	35.4953	42.7786	11.5116	7.62618	16.1525	15.8613	25.1352	11.3497	16.8148	11.5551	42.0125	36.006	35.2881	28.3824	28.4509	32.4083	40.4694	45.7394	35.0952	31.2954	32.6352	38.1507	50.2657	54.3704	47.8553
ubtd1b	31.1078	39.2871	63.563	12.7927	5.73249	21.0742	9.58263	7.2633	15.6695	16.0322	16.8067	10.7171	8.85994	9.27171	3.40616	4.19608	7.71149	3.43838	4.39916	4.10364	8.71569	8.60084	5.66106	4.7381	6.19188	7.09384	15.1737	19.1106	9.81513
5_8S_rRNA	31.0782	41.0188	41.9723	32.0054	30.393	32.0795	102.48	150.652	147.912	171.241	186.146	128.636	213.832	165.915	0.846084	0.350992	0	0.361436	0.294954	0.103998	0	0	0	0.163555	0.504921	1.79779	0.534192	0.617695	0.61739
cdkn1bb	31.0692	26.5497	24.0804	93.4755	144.972	93.1047	9.5209	10.2234	12.9717	12.1101	16.9852	12.8144	12.2238	8.02831	23.7425	16.7622	27.6499	14.4724	19.6728	16.0571	24.4054	28.0872	13.0948	18.6355	22.0787	29.9703	7.97079	14.2472	6.59461
RWDD2B	31.0308	52.3654	38.5475	70.3312	53.1802	56.7576	14.2819	10.0643	27.7317	36.5259	35.6637	18.1003	22.508	18.6992	7.45992	5.52532	5.87468	5.62405	4.43249	3.86878	6.16667	9.40591	3.65485	22.538	24.165	30.3989	14.4401	17.477	15.6152
rbm15	30.9927	35.1506	35.3303	36.5352	31.9609	49.7739	10.7736	14.21	26.3556	24.2525	25.8927	11.5008	12.4602	10.4307	11.1762	7.86667	12.0935	13.1077	12.3784	10.4774	13.7042	8.92299	6.37854	9.65326	9.28544	11.2084	5.23525	6.43755	6.03487
acin1b	30.9734	50.4452	39.6119	39.1789	26.6912	44.416	8.35094	6.63559	18.9466	22.4347	27.3164	11.2067	8.83103	7.38605	18.1043	15.8484	19.8447	14.9704	19.9826	16.0784	24.5902	21.0825	16.0317	9.48135	12.2825	12.8209	9.85117	11.6892	10.3218
nlrc3l	30.9636	31.221	40.0045	33.3643	50.0211	50.1035	4.49212	6.57498	11.5636	12.5888	14.2954	6.09185	5.86484	4.85347	9.72054	12.1447	12.5968	9.55252	8.62474	9.01859	13.377	9.64056	9.09312	8.38816	10.4445	12.8679	4.42134	4.51991	4.36575
cd209	30.9469	20.1508	20.7861	2703.16	1851.19	2039.49	22.1358	28.4958	25.0876	40.836	48.5345	333.665	473.154	351.382	36.2597	10.2798	11.0399	1.8555	43.8356	0.182236	3.1791	44.7077	28.2306	3526.01	3711.89	5112.99	2177.82	2390.52	2379.4
sem1	30.9429	42.2952	58.8333	16.9095	25.6333	17.7524	6.56191	12.9333	4.87619	12.519	11.2667	6.27619	13.6667	11.7048	84.7571	88.6571	106.01	87.8905	82.1238	105.481	99.581	128.929	115.419	81.9667	96.1786	123.262	179.186	155.331	164.083
ccnd2a	30.9381	58.467	49.2209	24.0041	16.3113	30.9389	13.361	14.793	27.696	22.8346	24.5803	19.8158	12.0799	13.7311	7.43032	4.74165	7.69193	6.35941	6.30562	7.22086	10.295	5.56968	4.82804	13.5884	10.6202	14.9747	14.119	14.7718	13.5249
5_8S_rRNA	30.9333	41.2078	39.0569	30.2204	36.459	34.6339	121.85	179.901	151.007	188.49	216.468	134.093	240.362	180.972	0.991642	0.33769	0	0.080534	0.304193	0.163796	0.07503	0	0.675325	0.695008	0.844663	1.17938	0.824117	0.677709	0.395191
mapip	30.8903	29.1361	26.8526	30.3622	30.0596	25.5816	13.1395	15.1102	19.0292	27.2565	21.2092	15.3065	20.5636	17.8493	50.045	50.5062	56.2587	46.6648	50.865	46.5461	59.847	63.0326	59.7036	41.784	29.6507	42.7812	36.9854	38.5517	22.9595
nduba	30.7417	16.6941	41.5396	35.0798	23.5697	11.0896	0	0.053023	0.022263	29.451	0	1.73822	22.3698	0.404095	55.9284	0.047476	0.067946	0.069175	4.42146	0.072192	0	0	4.54532	47.4467	2.44365	0.054927	5.8644	0.13048	0.177786
SLC25A28	30.7298	59.6815	36.5724	40.0914	36.5222	37.416	6.80988	8.80761	11.5848	17.078	17.9342	9.96337	12.4235	9.3216	8.17243	7.17881	11.6049	5.86625	6.07942	6.83642	9.02593	8.03107	5.86831	13.4399	10.5975	20.8877	5.23539	6.06914	3.86667
rex1bd	30.7241	26.0709	28.3484	16.0331	11.5133	13.869	4.50434	5.4032	8.57437	7.54833	7.70553	4.7594	5.39386	5.009	3.67837	2.28313	3.7836	3.58304	4.58463	5.36104	6.72576	4.46367	2.84379	9.13121	11.4588	13.1821	11.6918	10.4122	9.85931
snrpd3l	30.705	51.2119	33.4977	55.3476	57.4512	51.1456	4.11585	7.0625	9.47104	18.5579	12.779	11.1524	10	7.55335	13.8049	10.4909	16.0427	9.82774	9.90701	13.6143	22.7363	11.8338	9.07012	21.0823	18.654	31.7485	11.7957	6.76677	12.6067
retreg3	30.6331	26.6702	26.4096	15.1284	13.9527	18.1865	11.4614	9.62739	18.4818	29.2842	27.2985	14.6584	15.189	10.0527	3.41635	5.15996	6.29502	5.30204	6.58748	5.42784	9.31418	5.2069	5.17433	10.8633	12.6066	14.6702	30.3493	28.8959	27.2522
mlec	30.6292	37.3676	39.3194	42.6613	27.0911	34.798	4.49946	2.74384	4.79743	6.99571	9.10932	5.05145	2.81994	3.62165	5.90247	5.38371	6.59807	4.91747	6.52947	5.40622	7.72669	4.74169	5.81994	22.582	17.0654	24.4598	3.83601	4.55841	2.29046
zgc:101016	30.6142	27.4963	21.3099	100.681	100.983	92.2612	12.2697	12.4888	25.4438	18.3483	27.4972	10.5805	13.3408	12.5393	6.1573	11.529	8.397	7.25281	4.82959	4.2191	7.88202	9.59925	3.77341	76.3652	69.6742	91.8493	15.9654	10.0318	18.2903
tmem203	30.6139	45.0384	33.9904	27.024	16.5827	31.5707	3.29017	6.44844	5.03357	13.1607	7.54197	5.68825	7.78177	6.13669	2.77218	2.03357	2.35731	2.08393	1.50599	2.18705	5.11751	2.07434	1.92566	3.22062	3.55396	7.48441	4.81775	6.56115	5.13669
ilrun	30.5923	35.0708	40.5256	52.303	41.8274	48.8083	9.97024	7.62441	18.5292	21.9113	23.0994	8.40774	9.70952	9.57857	11.6143	9.54941	13.3747	9.40298	11.9958	8.3131	15.7616	11.2333	7.01845	7.92738	9.96369	12.8417	3.87738	5.35655	5.06607
ebag9	30.5566	52.2925	49.4575	26.7217	40.8255	29.6478	16.691	13.761	25.4748	27.5236	23.8742	18.1761	20.3703	19.1627	4.73663	4.76101	4.00314	2.8066	4.6934	5.11635	3.93553	5.82076	4.13837	14.9104	4.57862	13.9182	7.21698	8.61635	7.31761
rela	30.5419	37.3916	35.151	33.4856	32.8444	56.3611	10.4789	12.6525	21.9562	21.5441	24.2676	12.6866	16.9673	13.3084	22.1004	17.9576	24.8794	13.9662	26.5363	19.5117	24.3968	22.8145	16.3741	19.9187	15.7313	22.2729	10.2551	10.9065	8.04049
5_8S_rRNA	30.5088	62.4517	41.4688	34.6878	72.3926	59.0248	238.456	372.458	287.108	236.632	386.486	238.976	485.946	357.724	0	0.811181	0	0	0.449498	0.307985	0	0.482955	0.811003	1.92213	1.1908	1.50852	1.02932	0.322798	0.34928
ppp1r3cb	30.4932	49.0893	54.378	25.1288	13.2368	40.0561	3.81724	3.86189	2.20249	4.28245	7.28037	3.63551	2.97196	0.726895	6.70301	2.79024	6.83489	4.68847	10.7767	8.15265	10.945	12.1963	13.866	4.31879	7.4839	4.68536	6.6947	8.23884	5.50467
esama	30.4841	37.1468	32.9152	33.1379	34.3009	50.6497	11.2316	9.85914	14.5501	20.4978	21.986	7.58923	7.85914	5.5413	6.85841	7.57375	10.4661	4.74705	11.1372	7.81047	6.5826	5.98673	5.09329	11.3289	14.2006	13.3038	11.3872	12.1246	8.08776
fam114a1	30.4651	35.4574	29.5395	78.9142	55.6332	76.6242	4.6634	7.32721	8.92797	11.547	12.4807	9.08265	7.52696	4.93845	1.33715	2.37228	2.21433	2.14706	1.8622	1.71868	2.83606	3.26825	1.69199	29.283	33.0206	32.4326	9.53105	10.3905	13.9477
SCARNA6	30.4105	36.2201	42.2724	29.694	33.4291	28.4552	182.675	210.392	189.44	133.619	216.511	245.66	225.601	208.832	0	0	0	0	0	0	0	0	0	0	0	0	0	0	0
mcur1	30.3734	34.2542	38.1167	38.0896	22.0781	34.1469	7.32604	7.08854	11.1052	13.225	16.9927	7.8651	7.28333	9.66875	5.78333	3.40208	4.28229	3.64896	3.09167	4.85521	4.31875	3.75521	3.33646	17.6359	18.8359	30.2422	18.599	17.6573	22.0167
si:ch211-214j24.10	30.3304	27.1564	15.3999	0	15.929	64.8977	16.5891	17.2969	27.6901	27.24	23.0445	15.8018	19.0692	20.869	17.9692	0	0	13.8905	16.3416	0	0	16.2352	0	0	0	0	22.4042	0.405844	0
ube2n	30.329	40.5269	37.6231	28.6218	29.2847	15.206	1.16604	10.0692	0.793652	10.6816	0.896893	10.7811	11.0754	1.36869	30.5155	32.0517	1.60447	21.3049	17.5495	1.55028	2.34047	31.0759	24.689	18.2799	1.0882	0.34852	11.4036	1.33259	0.896705
LYRM7	30.3172	18.2231	32.2702	37.3562	38.996	31.4973	14.0027	12.9422	12.75	15.2782	22.6909	8.52419	12.9489	12.9032	34.3401	29.1156	34.2863	16.8616	15.5672	25.9973	29.3575	25.9368	16.5927	26.1425	18.2043	40.5793	24.0278	22.9543	31.0175
ctsk	30.2939	19.2393	23.2218	23.4574	7.45868	15.6841	6.47594	7.01987	7.3614	5.47803	10.2751	6.79759	8.2751	6.27301	26.1593	17.8771	29.3677	17.234	20.8052	19.2487	40.7571	24.3967	19.0641	3.61402	5.25784	8.73849	2.64853	6.04498	4.89278
pdap1a	30.2798	14.8442	3.58961	26.5673	21.9363	17.1101	0	0	12.1721	0	5.94849	0	0	2.78029	16.3558	69.1448	14.384	5.67417	51.2981	10.5899	5.34628	16.0092	54.2807	81.5087	82.875	118.237	18.232	92.2473	20.586
arl15b	30.2714	23.1207	19.4712	34.7842	37.8077	57.5299	11.1004	4.9359	9.22008	9.96795	12.5064	3.25427	8.56624	9.41453	2.58333	0	0	0	1.91453	0	0	0	2.15812	7.89744	7.87179	8.2735	9.52564	6.82692	4.16667
il13ra1a	30.2651	35.7382	31.6898	41.1539	39.674	63.491	13.3272	10.279	13.5309	14.7972	13.2543	9.79702	10.1487	10.0232	9.09473	4.93199	10.5611	7.42991	4.77169	6.56627	16.3503	4.55448	4.12734	21.9214	22.194	26.1345	19.008	25.594	21.4393
cryz	30.2635	47.3859	24.1511	1.65339	23.7997	35.7625	1.45813	1.33206	37.5319	18.4008	2.76846	3.24663	43.6634	37.0182	19.0509	13.8568	19.8858	17.418	18.1553	1.70599	22.1974	24.2013	23.2576	20.6933	26.5832	19.2821	3.82312	38.4458	101.543
churc1	30.2625	26.8761	45.6785	46.0826	44.882	52.7758	12	16.944	11.6549	16.4189	23.8288	15.6431	14.236	13.3525	12.0442	7.34513	15.3805	8.15339	6.79056	7.0354	16.6047	10.1357	6.23009	53.5059	49.0855	52.9617	39.8997	39.1134	42.0206
bsg	30.2601	28.7903	43.9538	56.794	21.9496	49.6108	13.7564	16.3397	12.0842	12.554	17.5211	15.359	12.7253	11.2134	30.6383	34.0934	44.7335	26.8745	30.2253	33.7152	36.4098	38.4918	27.5082	58.0009	66.8901	89.8352	59.4725	72.1676	54.6671
SMCO4	30.2556	34.4333	29.0389	62.7778	76.8111	74.2444	11.9889	11.9111	31.6056	34.0833	34.5444	20.1944	17.6278	11.1611	18.2778	14.8389	22.0722	15.2389	15.3444	17.1278	28.5056	18.5222	22.9167	94.2111	96.6833	104.778	43.3389	26.9778	40.1333
prox3	30.2487	35.7083	31.9935	23.5506	16.8118	31.2681	7.98937	7.28386	14.0203	11.3204	12.5904	6.26768	5.84374	5.17152	1.1669	0.331946	1.40314	0.626907	0.941285	0.487286	2.42164	1.61442	0.686546	12.9025	9.63477	14.7836	8.37587	12.3985	12.0587
timp2a	30.2423	43.6421	38.8484	32.3752	7.92259	18.1831	8.93716	4.30055	13.122	22.3256	24.4745	10.4736	9.96903	8.51275	33.4485	30.8046	33.765	27.939	39.3725	44.7568	46.8739	48.1362	30.9212	7.82514	7.86976	9.58652	11.4317	11.0628	7.30601
mrpl34	30.2416	54.632	45.0592	54.3056	49.1392	38.2688	9.9824	13.424	14.7792	14.8544	15.0848	12.6736	15.8016	12.0544	25.9392	22.0704	29.2672	20.416	25.9376	25.7216	44.952	37.768	32.4528	33.8272	31.7312	46.1008	45.8432	33.472	40.2176
tmem167a	30.1961	48.4627	33.8196	44.7843	62.4686	34.6157	10.0235	12.9725	13.0588	18.0667	25.7078	15.8196	14.4118	19.2196	23.4157	15.2667	24.1294	20.4569	18.4667	17.5765	35.3176	18.5608	19.4471	36.7627	35.2765	59.8627	29.5804	31.1667	23.1176
socs3b	30.1677	52.5853	23.131	42.6235	17.6703	24.9201	10.2448	3.24694	15.3463	21.1058	21.7149	7.06048	7.51476	5.59755	3.17279	0.769618	4.68394	2.81569	4.50036	1.99856	4.37365	4.42765	1.82793	28.1375	30.3542	47.6991	6.20086	4.34341	2.2275
MRPL41	30.1667	44.3824	38.0417	59.8382	60.1593	73.1544	20.4681	24.7672	48.7181	40.5809	32.3725	17.2157	27.7819	28.6373	70.4583	41.5123	61.4412	38.2598	53.5907	44.3407	63.8015	61.3382	54.0049	38.2721	44.049	76.924	66.7181	57.3162	79.6814
hic1	30.1605	48.577	49.259	24.4388	35.6929	36.115	7.26378	6.49169	7.77384	11.2542	16.8066	4.45713	4.01881	4.43876	7.35652	6.6566	7.75941	3.37533	4.62336	3.54812	7.7804	8.40945	3.58224	2.15442	1.6671	5.04768	1.98381	1.14086	2.76203
RAB27A	30.1549	42.2729	30.8702	21.8953	23.6637	28.2257	9.48525	3.50442	11.823	11.8016	10.3643	5.70059	5.37906	2.9469	10.7035	4.39086	13.0265	10.9587	8.66962	13.7655	32.528	7.44838	6.24189	18.3009	12.736	29.1313	16.0789	27.2198	16.3643
PIK3C2G	30.1095	25.9733	31.6028	59.6934	43.6424	60.9498	3.44787	3.73825	9.59174	7.05873	11.5268	4.82343	1.93331	4.29134	0.200668	0.27058	0	0.120496	0.60272	0	0.443331	0.312336	0	4.91005	4.78681	4.74708	1.0952	1.67907	1.44214
MTFMT	30.0775	30.8003	25.3701	6.56845	10.734	11.2413	7.27997	4.11562	12.2185	9.0232	17.9544	7.02726	5.08237	7.97138	5.47564	4.55607	6.13766	3.27301	5.98569	5.68794	2.89714	3.67749	3.32521	6.97293	10.4246	8.45959	9.70456	8.81245	9.24053
msraa	30.0512	18.8355	33.9332	32.4957	18.3949	27.0973	19.1555	17.6748	27.5508	32.0056	20.2119	22.5065	20.404	17.1882	28.8807	20.5521	27.0823	23.5715	20.786	19.2558	33.1783	27.969	28.6158	62.1394	68.5543	90.3824	88.4737	78.6098	59.1777
rhof	30.0502	36.5005	40.6374	100.435	230.77	107.375	11.6134	7.59979	14.6729	16.6123	19.0575	14.4399	10.72	7.907	9.47127	3.85423	7.71473	9.00209	4.71264	4.49582	9.97074	4.37722	5.77952	29.4974	42.4336	52.7403	9.72727	6.69765	6.60711
ranbp9	29.9491	34.3372	34.8336	23.5484	24.3239	29.2999	10.5069	13.8806	26.1172	24.8402	30.3856	13.1777	11.4093	12.6014	11.7266	13.23	15.3087	12.1429	15.8422	15.5387	21.0146	14.5608	15.2573	10.8939	13.7758	15.4577	8.10475	8.6827	10.7579
ethe1	29.8914	40.0408	48.6103	23.6305	8.37012	13.2437	7.42529	9.4046	12.4201	10.0943	16.9782	7.91379	10.5816	11.6598	3.44253	2.78966	5.7023	6.41954	7.32414	4.55517	5.62529	4.65402	3.1931	21.0471	24.5	25.7149	35.0828	32.6943	34.7017
lipea	29.8719	24.4376	28.9493	36.3293	29.7288	32.3537	3.36269	5.38677	10.4083	13.7115	15.95	6.52372	6.38533	5.30032	2.22789	3.99353	3.32926	3.4069	3.05356	2.06183	4.58016	2.67865	1.945	6.12114	4.68045	10.7408	5.2872	5.38174	5.70237
slc66a1	29.8445	42.0264	37.6231	114.757	85.0279	117.478	11.7368	3.19242	16.6685	31.9821	27.2164	10.5184	6.34197	8.30708	8.34995	8.84347	11.5533	9.90329	10.324	11.5763	10.329	10.5444	7.47956	59.4437	67.7572	102.619	21.1655	22.6575	18.7817
hypk	29.8333	23.6626	39.0451	44.2206	55.873	34.3743	40.3682	31.1899	80.6954	71.4973	79.9153	27.4433	62.515	62.4768	162.943	138.134	198.105	127.574	179.967	153.314	181.392	211.791	163.02	99.8702	112.104	169.829	146.153	130.714	146.669
sar1ab	29.8321	0.532033	13.4424	0.351434	1.93526	0.643754	1.0532	0.632835	13.924	0.817092	0.708413	1.03204	0.68314	0	0	0	0	0	0	0	0	0	0	0.051849	0	22.1581	0	0	13.3253
tm2d1	29.8051	26.5982	22.4063	24.8399	18.7983	19.6045	8.73716	4.35347	13.6208	14.5264	18.0536	9.11631	5.00831	6.76284	4.56798	4.14048	3.63897	4.81193	8.12009	5.45619	10.3376	12.7341	4.88671	9.3074	11.9335	6.37236	4.84819	14.3112	15.9063
nduba	29.7752	39.1757	0.029151	34.3644	22.6742	29.6106	0.008918	0.053072	0.025923	0.033858	0.049587	0.076453	0.066644	0.030192	21.3676	0.047408	0.067838	0.069057	0.16748	0.072934	0.080014	0.10455	0.08251	0.051688	0.146828	0.100121	0.146494	0.130302	0.290627
cd99l2	29.7413	56.8893	65.9726	48.4577	28.5883	98.8943	1.48756	2.22388	3.37313	5.33582	1.72388	0	0.689055	2.70647	1.93284	4.73134	5.22264	4.88806	4.23881	0	3.68657	7.91542	2.68408	0	0.594527	0	1.82836	0	0.718905
si:ch73-335l21.1	29.7086	34.0586	43.3915	33.2038	32.5851	41.9612	7.184	6.35314	12.165	10.7193	15.6875	5.21527	7.71931	6.53062	16.0477	14.1439	14.9732	6.77978	9.25723	9.0516	14.3034	13.4178	11.5189	2.69534	3.26766	2.85171	8.57232	7.85067	7.82434
NAGLU	29.7037	43.2867	44.849	40.7018	33.1039	43.3325	15.187	14.0422	20.9628	22.3725	23.6116	13.2957	10.5006	9.4041	2.33028	2.39196	4.22602	3.19777	3.10903	2.33705	3.83645	3.59889	2.5953	12.8309	17.618	13.6236	13.263	14.0852	13.7402
nat9	29.671	28.8652	40.8283	23.8638	23.3536	15.9362	4.42826	3.87246	7.28986	10.1159	10.8638	5.19855	8.28406	5.22754	9.76232	10.8362	15.6174	10.4942	12.8145	9.01377	17.4312	10.7188	14.1768	13.1138	23.4203	27.3645	24.771	22.0667	26.963
klf13	29.6528	30.7497	20.5092	37.9602	63.991	55.6529	22.7203	11.7209	25.0179	14.489	25.9268	4.71626	5.97693	4.73529	5.94925	4.56747	7.97635	2.83737	0.948097	3.24625	4.27163	4.16782	1.5496	3.82757	7.5271	7.13495	6.70588	4.26413	5.57728
fbl	29.5507	26.1444	32.7648	81.6418	63.0885	47.1337	14.7235	16.8276	24.2827	28.7033	30.4704	30.6057	28.8058	21.6838	21.717	38.6627	37.448	21.4909	20.8253	17.6392	42.8504	40.336	37.7703	60.2293	57.7245	82.7938	31.0361	25.2674	20.8696
htatip2	29.522	44.6877	51.9769	32.9901	27.0653	31.1564	8.49396	9.43359	26.5571	23.9012	25.4561	8.55982	11.6894	9.03019	16.7409	13.1992	18.9802	13.0231	13.0922	19.1559	15.7311	11.9265	10.4468	28.6493	22.573	29.517	21.4122	25.8946	27.0993
pim1	29.5122	34.7137	27.8524	103.84	29.7924	59.3112	21.7856	11.8509	72.9201	57.6234	74.5251	21.8354	54.2213	45.0577	15.3746	4.37801	8.54742	12.2993	14.2235	9.67938	20.6892	14.1507	9.65189	34.9218	39.6045	58.8615	12.9495	11.4364	12.04
luzp1	29.5044	30.1167	34.8504	49.6321	50.7119	67.0574	9.92085	11.3786	17.0118	21.0685	29.7532	11.8328	12.0056	10.1403	1.85816	1.64429	2.496	1.63539	1.73811	1.88039	2.62561	1.65829	1.68141	4.19164	4.37839	8.8426	3.29635	3.21187	3.05402
pcdh12	29.4846	36.5008	21.8098	28.256	14.0126	22.4255	7.17899	5.25798	13.1832	16.4588	17.1364	7.60084	7.36583	6.8437	2.14874	4.08992	4.48375	3.4014	6.3507	4.30868	7.17479	8.03838	5.35966	12.2109	13.3109	16.9583	8.32465	7.48235	7.90252
xiap	29.4522	31.1007	30.4509	117.464	108.351	158.062	11.5982	10.8621	22.2566	19.3665	23.5915	16.3982	14.4145	13.2838	2.99669	3.97647	4.51765	4.2886	3.76912	4.14118	5.74154	6.32169	3.38382	44.2877	41.5945	61.9369	14.4963	16.8533	19.0607
tm4sf18	29.4418	43.9343	29.4327	23.4567	38.014	44.824	7.08024	9.18011	8.80943	9.30669	7.85857	5.31841	5.10094	4.31614	40.4463	51.7684	38.0415	23.1245	22.6547	27.0132	23.6858	22.5151	15.683	12.6157	15.2906	20.304	10.3105	6.40153	4.89434
ARGLU1	29.3726	51.9101	32.5941	34.5403	31.0023	36.1766	9.99444	6.34106	19.228	18.4259	23.298	7.12558	8.30862	7.23401	45.7356	38.7604	48.4435	36.0959	39.1979	35.3777	60.3489	44.6063	41.7831	20.4203	18.804	24.9305	11.145	11.5769	14.0802
NFE2L1	29.3622	36.7828	40.6737	149.785	167.528	227.06	8.06309	8.8941	13.7559	17.402	20.4478	9.87413	9.67787	7.526	27.8857	22.0983	27.8296	22.9946	24.2416	21.536	26.8486	23.7035	23.3881	37.0618	37.4727	50.4983	9.87223	8.56516	10.6191
cab39	29.3565	50.127	32.9787	34.2343	25.7685	29.8613	12.2042	11.496	14.3899	17.8497	13.0571	9.4992	11.3252	9.26527	15.7367	19.2219	22.4393	16.0072	16.543	20.3083	25.6885	22.6869	16.9297	13.5141	11.3445	14.6684	13.5651	8.63022	8.01125
zftraf1	29.3409	32.3573	28.326	32.105	38.2325	53.0789	9.63076	7.71639	21.8232	19.14	21.5626	8.78315	9.98435	10.1492	19.0511	16.5083	18.9484	13.1464	18.3338	15.186	14.5078	14.2703	14.3531	10.3527	10.3766	13.9185	6.4291	7.04788	5.49355
tmc4	29.3375	68.5056	8.11355	10.5501	11.189	2.9138	8.10651	4.36718	8.23663	8.14173	18.4277	8.74783	5.54041	5.43784	2.13883	0.113552	0.556569	0.624119	0.393701	0.493991	2.47244	0.527973	0.18649	2.75549	3.74099	7.24907	2.45131	4.62288	2.84832
si:dkey-31g6.6	29.3333	77.3504	10.9091	12.7424	14.1856	38.9583	0	2.14773	1.07197	1.62121	2.30303	3.08712	1.97727	5.74242	0	0	0	0	0	0	0	0	0	8.0947	6.82765	1.9053	10.2955	6.17424	10.4621
aspdh	29.3308	2.82699	4.4347	34.7911	24.0533	38.9622	0.357973	1.12778	0.442095	0.729202	1.31054	1.73403	2.20382	1.63991	0	0	0	0	0.16661	0	0.098316	0	0	0	4.68798	6.62785	0	0	0
nr2f6a	29.2963	35.4637	35.9836	31.8946	3.20492	16.1326	7.42506	8.08724	30.1727	27.3402	27.8934	13.5609	12.8653	11.9133	7.22131	6.31675	5.44321	6.37822	7.06675	5.42857	5.43853	5.60773	2.82845	6.62881	9.29801	8.14754	10.4104	14.9871	12.3689
rnf11a	29.28	27.4932	38.398	32.6122	17.7744	24.661	9.12245	8.56123	18.5317	15.5612	8.76757	9.17687	9.6746	6.86281	35.9989	25.666	28.2676	29.0873	33.6338	43.3212	31.0397	27.6689	34.9558	12.5601	10.619	12.7874	14.3311	15.9297	10.7868
slc35a3a	29.2715	40.2693	47.8093	27.2453	26.7943	25.9222	12.8594	10.9353	20.0516	22.4256	29.534	13.2191	11.2842	9.66717	4.273	3.86986	5.0647	1.9641	2.14735	1.10172	3.56245	3.60284	1.89005	10.65	8.64921	10.8863	10.623	16.0673	11.8882
gskip	29.1869	31.8788	17.9369	34.8283	43.8788	48.2097	9.7197	16.3106	18.6288	11.447	21.1364	8.63384	11.3561	15.1086	10.399	8.39646	22.351	7.08586	7.11616	12.8561	11.8081	16.8131	12.0884	20.4117	15.0354	29.9066	13.9874	8.75505	11.4697
jade2	29.1832	34.4747	36.3428	33.2139	29.9982	38.673	7.14016	8.12808	22.1312	17.7942	24.3958	5.4336	8.13097	6.2021	2.77323	3.91496	3.31286	2.02992	2.43989	1.80997	3.61759	3.04357	2.82205	1.65171	2.40577	4.36273	2.1958	2.10499	1.66352
chst7	29.1537	34.2012	33.1364	34.5786	22.5112	61.8644	5.8437	4.96805	9.37824	10.7919	21.5717	10.0656	7.93005	8.37738	6.24525	7.17962	6.11917	4.63817	5.04577	5.35406	6.78497	7.82729	5.86269	13.4214	16.2409	17.152	12.0915	11.4447	10.4585
arl5a	29.1343	42.0118	29.331	52.1949	48.4547	58.1025	11.0471	8.72791	22.9435	11.9093	21.636	14.364	20.3274	17.2344	18.5795	16.4682	20.4252	17.1861	16.2155	22.1743	20.3616	15.5289	14.6849	32.9729	28.553	38.4859	14.7338	14.3534	14.874
preb	29.1056	3.31366	12.4205	11.0517	7.65663	11.3219	11.5863	1.09065	28.0267	2.2727	0.940995	12.8173	13.5512	0.299392	0.081713	1.02611	0.30508	0	0.14548	10.2996	1.27792	0	0.107463	45.5676	45.5379	2.65492	0.093229	16.8216	0.109242
spi1b	29.082	33.4832	33.701	29.3322	6.45447	12.7121	5.29861	6.34167	4.88884	7.73831	8.4557	4.89171	6.58204	5.14192	5.04061	3.44012	4.73831	4.59557	6.53815	6.3265	14.427	7.92945	4.82322	5.12756	7.1895	10.041	2.2338	2.78015	4.15053
coq10b	29.0742	59.0263	37.2389	61.2482	130.637	137.41	7.85514	7.77921	15.2138	21.5923	22.1379	6.13201	4.98248	5.09579	342.029	357.855	341.085	170.682	207.752	179.258	227.647	271.251	141.631	20.7512	29.9334	36.4498	12.986	9.42757	14.7804
pole4	28.9669	20.1087	23.565	153.541	173.092	130.177	9.84397	7.52482	26.6879	39.8534	36.1111	8.30496	15.2884	6.20331	8.32388	4.77069	11.6336	11.2908	10.5272	8.06856	14.383	7.35697	11.3097	91.9705	83.5106	135.753	23.9882	25.7872	25.2742
UBE2K	28.9637	12.3382	10.3417	52.4771	2.25654	4.16884	0	0.311623	2.70158	0	2.38311	1.66639	0.327639	0.968524	24.6476	23.8879	10.1963	2.82497	25.6977	7.71302	1.37595	13.3046	11.8793	11.5522	10.2046	35.2333	0	0	0
si:ch211-271b14.1	28.9569	37.5759	29.3819	25.1431	17.1274	25.5311	7.47572	6.64594	10.8483	10.1772	10.9923	11.8845	10.4303	9.13928	9.4926	8.97661	12.4624	7.57194	7.02368	9.5974	12.8086	12.3782	7.44035	13.2741	11.9704	22.038	11.775	13.6945	12.6686
exosc3	28.908	104.478	76.0705	21.2662	15.6128	32.6949	8.17164	6.50332	13.2231	18.7736	17.1617	10.3872	10.1633	6.93781	13.9701	10.9768	15.4743	11.9428	8.8607	12.1708	15.5481	18.7629	12.8964	33.5688	28.8582	47.2944	29.6078	32.4718	28.6053
scaf4a	28.9037	36.5945	32.9217	29.6736	23.934	42.8936	8.22473	6.65148	17.7922	17.0645	19.7516	9.95917	7.48959	6.95755	4.38607	3.96461	5.67523	4.13868	5.07136	5.03713	6.38839	5.57009	3.61948	4.63775	4.00324	4.70402	1.90932	1.95264	1.81645
sec22c	28.8891	37.0726	26.4447	21.1379	13.6934	24.6618	13.9041	11.9598	22.1797	17.4547	23.5734	11.2136	11.5614	11.7233	3.29674	3.15752	3.50759	2.97367	3.19723	3.32173	4.92146	4.32173	2.0116	21.5821	19.2374	23.8108	29.605	23.6863	27.9333
mea1	28.83	38.4296	35.1533	36.2727	39.1586	45.8592	23.2852	26.7041	34.8824	32.1649	41.3565	20.8672	22.9447	18.4046	18.2611	13.4759	22.8806	14.8699	14.0865	16.6586	22.9225	16.0847	11.164	63.9804	58.1791	108.784	62.7398	60.4982	77.0642
bmt2	28.8295	42.5601	37.0536	29.2651	38.9331	43.2633	6.2799	8.20592	15.2842	15.0142	14.307	8.26202	5.48089	5.02096	6.24353	6.47226	6.0074	4.31936	3.54686	4.22873	4.82799	6.78237	3.0148	6.85851	7.43527	11.6695	5.37916	2.84649	6.41122
ormdl2	28.7362	18.3585	0	47.3331	0	0	0	0	0	0	0	0	0	0	0	1.42331	2.11404	1.69574	1.88166	1.56324	10.5189	3.17668	1.14381	1.85034	11.053	1.04001	0	14.4264	17.8474
bloc1s5	28.7257	29.8292	27.5411	25.9676	12.7101	34.3703	12.1359	8.64588	16.2095	11.4052	11.9825	14.255	9.18018	9.78928	19.2643	19.3254	26.1758	14.7101	23.3909	16.2307	22.9352	25.5237	17.4975	21.9564	23.2014	27.3148	25.0349	25.8273	21.0567
lsm1	28.6826	2.37457	28.0846	27.0921	13.4658	29.5056	1.74084	1.81913	11.2429	3.29088	0.812609	2.19589	3.83327	2.85686	4.46865	4.05365	10.1994	2.89406	2.28115	3.01911	2.75732	10.1964	4.21394	0.647377	29.8657	35.2697	19.5022	23.946	11.232
tprg1l	28.6801	29.0708	23.8481	17.5502	13.043	29.5179	4.91891	5.77867	8.64606	11.2608	13.9866	4.5457	7.40771	7.93011	6.87903	10.7195	11.1192	4.0672	6.57168	7.05466	9.96685	8.16577	7.71505	10.8593	13.3692	13.5502	4.52419	5.38172	4.43728
mrpl37	28.667	19.4838	37.0344	18.5325	10.0372	14.8079	11.7104	14.5496	35.4379	56.7447	56.0754	34.4839	30.3324	25.0342	22.9176	16.451	20.1253	15.4861	17.0302	15.4281	29.6433	21.9931	13.7229	20.4265	27.6114	33.3119	47.9658	42.5871	42.9533
ILRUN	28.6193	16.8254	28.0347	31.8013	27.5394	33.7855	8.85384	13.2766	18.775	23.3049	20.4196	13.0967	13.5552	14.0894	83.0868	60.8801	80.8023	67.8034	65.9117	64.1073	95.1567	83.3833	71.1877	15.7603	18.1746	20.7319	15.2471	13.6151	16.225
spata2	28.599	29.8587	24.1311	44.6887	45.1036	69.3443	4.70685	7.15271	19.1159	14.5135	20.9835	5.7758	6.29992	3.38198	9.9044	7.07699	10.1176	7.73604	8.35533	8.70981	10.72	12.3668	7.72208	6.85152	8.12352	9.71954	2.68105	2.26861	1.90355
tank	28.593	24.666	23.4704	39.1908	28.094	53.1009	5.70386	6.81198	15.5503	15.155	24.9846	9.1219	13.8543	8.84091	3.54408	3.23623	3.22383	2.56887	4.21005	4.56543	5.50895	4.63154	3.24105	67.5321	66.4518	92.4377	22.1768	16.6887	21.7462
dcn	28.5838	49.0195	52.9492	55.9609	17.6267	47.4477	9.57332	12.1704	15.9899	28.1043	22.5209	9.62046	12.7535	7.88468	154.635	180.978	247.938	144.461	186.477	180.291	199.467	236.258	146.107	12.1562	9.30314	17.0169	19.2505	20.5022	22.0735
abhd17b	28.5363	28.0896	34.8175	18.712	16.8798	41.0986	2.07596	2.7585	7.34581	6.54422	9.98299	3.97279	1.35601	2.10091	2.50794	2.78571	1.37528	2.20068	3.85487	4.21429	3.97732	2.06349	0.795918	2.95805	6.60204	7.21429	12.9535	7.36168	6.18141
tax1bp3	28.5223	27.1123	30.4989	22.3508	29.0972	31.7715	5.64581	3.73799	12.3855	8.98156	12.6793	6.87598	4.99385	5.23128	38.5212	38.7369	55.8391	35.5246	36.7285	38.7793	47.1782	59.1497	40.476	21.8782	13.0726	19.6849	12.9402	19.1905	12.3168
toe1	28.4746	18.0376	25.562	25.3725	36.8635	24.2107	11.3757	12.7579	20.4791	19.4778	21.4775	18.4085	16.5459	16.4297	38.4207	34.7726	34.4913	34.6448	37.4444	33.9133	47.2094	48.018	40.6769	30.5369	29.1567	38.3372	32.175	33.1435	35.1728
enc1	28.4339	36.6228	48.2058	47.9725	16.7317	19.418	6.40265	9.81534	41.0354	39.5799	53.2725	9.77355	13.9312	10.3143	1.50265	0.621164	0.914286	0.326455	0.820635	0.846032	2.24603	1.48518	0.795767	1.67143	3.89418	3.20899	4.36508	4.69577	5.7418
tmem251	28.4206	24.5034	31.7047	46.4676	45.6577	38.1655	13.2752	7.15436	14.5794	21.3624	18.7383	10.0694	9.30425	8.92841	7.48098	5.89933	4.68233	3.06935	6.52125	5.06711	12.5369	4.95302	3.66219	26.9128	27.9307	27.2371	12.8054	12.6689	16.0157
LYRM4	28.4104	34.5824	28.2204	33.4839	32.2993	23.043	21.6487	10.8262	21.2939	18.7025	26.7903	23.0842	22.8495	17.0538	18.4803	11.7921	14.724	13.6667	12.9176	9.97133	15.4194	13.7706	18.3853	37.9928	36.7509	64.1272	59.6487	59.3154	52.7832
fzd8a	28.367	35.3721	24.7192	18.6781	7.0839	19.2083	11.9886	9.72774	14.6992	11.2237	10.9258	10.9755	9.97489	8.28824	6.07877	4.23231	3.99144	3.58562	2.6718	3.38071	2.13413	7.91438	3.10331	5.04167	8.60731	12.8453	6.99601	11.6895	9.98459
shroom1	28.35	49.576	28.0047	21.7444	7.16978	25.8505	6.66703	4.76623	10.3444	9.8044	11.4259	4.73733	5.76472	4.29782	0.212422	0.163252	0.097046	0.183739	0.269571	0.229027	0.69118	0.188268	0	2.91956	3.54734	4.21113	4.9325	4.87664	5.38322
zgc:77151	28.3365	30.9299	33.2416	38.3925	34.3461	45.8741	5.13633	3.79652	16.6262	18.8812	21.3413	6.46689	4.97891	6.06382	1.61191	1.01998	2.00814	1.03552	1.39438	1.50167	2.9397	2.94525	1.91121	9.46282	8.28117	12.6167	5.63319	4.89197	8.16944
RAB5C	28.2406	44.4794	55	56.0241	37.847	37.3566	18.64	17.4283	31.09	41.5053	42.6574	24.487	27.1193	19.7449	24.9865	19.5438	27.2214	16.4812	20.206	16.4755	44.1227	27.8287	20.461	35.513	42.77	45.3479	35.1607	37.5756	31.1694
plekhf2	28.2024	31.1206	21.531	41.8053	30.5243	35.5442	13.5133	21.4707	50.5398	50.9148	40.4679	17.1692	18.2367	12.6925	5.72566	3.3562	4.8031	4.50996	4.97234	3.55089	5.51991	4.72566	6.01991	15.9513	15.6914	19.3993	8.43916	9.61062	6.92423
gatad2ab	28.202	30.5066	10.8315	16.7502	15.3654	27.5404	1.03434	1.33987	0.553172	22.1906	28.682	0.837604	11.9284	11.0921	2.19134	2.22434	1.73365	3.06428	2.82763	1.1981	2.9968	2.71389	0.998263	3.91796	14.7398	11.8439	13.4901	11.6247	1.01637
scinlb	28.19	34.7316	32.0713	23.214	23.6262	12.8795	11.9781	11.1295	16.4678	29.3348	26.4918	19.4429	27.4074	21.6067	10.6362	12.0022	17.2722	27.1647	12.6373	11.3537	29.8467	19.0679	13.3619	13.8421	14.7303	10.8165	11.734	13.7595	12.6819
chrc1	28.115	35.551	30.4244	28.6771	27.1242	27.0049	7.44834	5.75277	6.67774	10.2269	8.89422	9.12915	7.50738	6.00676	4.35301	4.73985	7.62362	4.59348	4.27614	3.23493	8.22878	7.93542	4.80197	14.6002	16.305	26.8893	15.3647	17.5953	19.4077
rnf139	28.1018	26.4749	27.3711	13.1202	14.3974	20.0661	13.3557	12.8117	28.7874	30.9305	34.3989	19.0253	16.1619	13.005	9.11376	7.31396	9.19523	5.45951	6.95678	6.95529	8.14406	6.99255	4.9533	13.4029	10.389	14.9841	15.1575	11.9935	12.2807
jpt2	28.0704	26.8294	22.7613	33.4116	21.4781	37.4421	10.9906	14.0485	12.4476	13.4585	12.2066	15.4867	8.04382	15.6667	55.2332	47.6886	64.3216	41.5947	59.1831	47.3607	84.5266	42.4664	47.8177	55.1085	49.5	65.9304	37.079	35.3521	33.3365
C1QBP	28.0243	22.5954	44.9744	46.9818	52.5231	41.2725	9.66346	10.7429	14.4326	18.6781	20.2705	14.2864	12.3751	11.3078	11.7108	9.74229	15.2569	7.59783	8.39863	8.25034	11.1324	13.0063	9.83247	20.3158	21.7751	25.334	24.0698	25.4065	23.7306
srd5a1	28.0219	21.5564	35.1955	37.7644	32.1529	37.5075	8.01504	6.39724	7.47682	20.4674	15.7538	4.44737	11.693	6.66291	6.28195	4.36466	5.94236	2.54511	2.45363	4.14286	4.50752	6.02381	5.45113	16.4373	24.5789	25.599	11.2224	6.57644	5.88596
NAA20	28.0074	31.7039	27.9311	23.1713	20.9516	19.6425	7.26816	12.0093	5.74302	12.4097	10.8508	11.8343	12.3911	14.7412	21.7337	16.6778	28.1434	27.1108	23.108	21.1024	34.1536	32.1248	26.6089	73.6723	45.2421	85.0987	73.0196	87.9544	85.9292
banf1	28.0072	32.6815	10.9307	42.5933	11.3107	26.2846	11.0416	12.1927	26.0563	18.8591	32.9761	11.7929	16.6881	15.6	39.366	26.8807	35.4675	24.0673	24.8107	27.4776	60.7018	42.9387	27.7521	17.6486	12.2999	20.559	18.5754	16.177	20.1733
glod5	28.0018	59.4733	59.2652	66.0424	50.5875	72.4954	23.2983	13.6169	30.14	32	35.8913	13.116	20.6372	21.3517	0.41989	0.41989	0.200737	0	0.685083	0	1.76059	0.707182	0	23.6041	22.0534	31.8969	25.5138	20.3867	22.5101
dnajc24	28	37.9644	35.0089	44.12	54.41	29.0178	7.59556	12.6578	19.5778	16.9133	21.9233	19.5856	20.72	20.3244	15.96	15.92	18.7978	17.1578	12.8489	13.4267	25.3022	19.0589	21.3967	17.5311	12.2378	16.2067	14.2489	5.55778	14.7733
plin3	27.9909	31.6966	36.0522	10.4737	7.94681	10.1393	3.28318	3.52786	13.5572	12.5755	15.8511	10.2827	11.3212	7.93516	18.2047	17.2969	28.7057	15.8156	41.0785	24.465	35.6834	24.6788	26.2254	6.42908	6.06535	9.08865	29.1424	27.3278	27.304
gorasp2	27.9621	1.03428	28.435	17.7396	10.0537	47.9308	0.953912	1.94406	16.5303	20.3638	20.9403	1.53277	4.52162	3.20258	1.18859	18.426	1.99876	1.03742	0.58206	1.05469	1.48979	0.989473	1.56348	1.36713	1.97164	1.23714	1.08053	1.666	15.5508
coq10b	27.9534	34.0776	41.5525	74.8247	56.9817	120.551	4.14703	4.04566	5.18265	8.32968	7.70594	2.5242	4.78174	3.82374	18.063	17.2064	19.147	14.011	17.7096	7.02283	22.5557	17.2347	12.8283	16.4521	14.3626	21.3096	7.12237	6.51872	8.63379
rab5b	27.9412	33.3214	38.9457	34.1623	28.5339	37.9104	11.5621	9.32654	13.4654	12.1326	17.7321	9.66544	8.23773	8.0571	14.3245	12.7155	16.5947	12.609	13.2576	10.205	16.6322	13.9826	12.9285	20.2414	20.4169	26.2237	18.5513	17.3699	18.773
amer1	27.9087	29.671	29.6059	21.881	15.4643	21.3801	4.99822	5.40333	11.9905	9.76413	9.85574	5.05711	9.79298	5.43754	3.80547	3.1401	5.86675	2.60321	2.53064	3.00803	3.31261	3.3721	1.24717	2.6624	4.93843	8.25134	4.4649	3.54819	4.14961
zgc:77262	27.8945	54.3051	34.4911	23.4775	9.81923	17.2769	6.68339	5.69488	8.44096	12.559	13.8798	5.05643	7.52456	6.30512	8.15569	7.65308	12.1964	8.33856	10.185	5.42006	6.6395	8.26646	4.98224	4.17137	5.45873	3.535	8.05225	4.80878	9.30512
rbm8a	27.8883	31.4043	44.3568	41.9555	47.2399	39.6422	9.50672	10.7415	13.484	22.8692	26.5708	16.6019	16.6494	12.9261	39.9607	32.9592	36.4405	30.666	33.6758	28.3382	52.546	34.0103	33.6854	44.7792	37.9023	54.9835	45.9561	46.7482	48.2187
wu:fa25f02	27.87	40.8248	27.7879	45.3815	38.1198	76.9671	11.9011	9.32895	12.2329	12.9478	13.3848	19.7273	11.6316	11.8616	3.00438	3.03505	3.03578	2.87258	5.84374	2.57503	5.63965	4.9058	2.99927	39.0318	38.6933	47.6422	56.8153	54.4312	46.4385
grnb	27.8397	25.2351	25.9566	31.6099	33.0399	34.032	9.64031	9.97752	14.9535	17.3678	20.0209	12.2039	8.03682	9.84632	7.81589	7.1062	8.76705	5.86822	8.89322	5.7845	8.13256	9.39186	7.36357	9.20136	7.57229	12.107	11.2899	13.1864	11.6558
trnau1apa	27.8097	39.6947	32.7228	40.2948	40.8185	58.8586	13.5941	10.4268	17.7426	20.8465	19.4252	13.1331	20.1276	11.9065	42.1584	49.8229	61.3328	53.4851	52.4598	46.6518	57.0022	66.984	49.1639	44.4995	47.8256	70.8025	38.4917	51.5176	38.6562
s1pr2	27.803	7.75312	10.1355	4.34938	11.6595	9.25847	2.93226	2.64528	9.44207	15.025	13.9394	6.90196	9.44385	7.91533	6.62032	8.82085	7.56863	8.59269	7.09002	7.09626	8.10873	7.42068	5.97371	16.4029	13.369	19.3431	10.4269	6.33066	7.77005
nacc1b	27.7609	44.515	33.2378	18.5019	13.8423	14.3022	5.11153	4.29256	9.91847	10.9837	13.0031	4.8673	5.18482	4.03	2.00555	1.88774	2.37577	1.52175	1.34336	1.20117	2.44715	1.88766	1.42584	2.23949	3.18204	3.58438	1.90336	3.36044	2.30686
chpfa	27.7562	32.4894	24.3107	42.1026	46.2077	53.05	10.6936	10.2243	17.4724	22.106	21.977	9.80096	8.50761	10.9948	1.81573	1.26901	3.1708	2.7588	3.82573	2.11473	3.83572	2.6445	1.70187	14.0926	17.3694	18.332	5.51412	6.51412	7.31899
diablob	27.7367	37.2689	33.0908	51.933	41.4687	45.0025	11.0394	13.6544	23.1622	27.6797	21.0961	13.521	13.7389	13.4815	11.3338	12.3475	14.1133	9.46337	7.933	12.9818	16.8529	13.4267	9.3206	21.8672	23.8303	30.3898	32.0266	31.3657	29.918
nsfl1c	27.7251	40.4562	35.9826	25.9935	39.3669	30.3421	11.4687	12.9733	25.2678	26.399	27.6717	19.6516	19.6837	13.7806	31.7096	29.344	40.7572	27.5553	32.0934	32.1832	34.9298	34.5724	27.6355	29.7901	41.2357	53.9976	46.5542	50.7463	50.5618
ntn1b	27.7147	35.4239	31.2728	49.3742	32.8472	52.078	8.503	9.81451	12.868	13.1173	13.1697	6.30606	6.20186	5.81069	0	0	0	0.129842	0	0	0	0	0	7.2144	9.31206	11.4452	6.00382	6.16258	5.31806
wu:fj16a03	27.708	27.5369	38.2473	12523.6	75.4712	106.087	4.35013	2.08409	10952.3	11807.5	11165.8	1.92078	10444.8	0.940121	0	0	0	0	0	0	0	0	0	30061	12.3234	46072.7	34937.4	11.0728	11.5212
atxn1a	27.6478	30.6952	27.3609	27.725	30.1118	42.7776	6.70762	5.98135	13.0839	13.6594	17.4468	4.49212	4.62689	4.9064	4.35188	4.25185	5.03216	3.34063	3.10647	3.06851	4.69186	3.37504	2.71727	3.40109	3.16114	6.09891	1.92988	3.50209	1.49984
patz1	27.641	33.1488	31.6164	20.2959	10.6531	17.2456	5.94067	4.1277	8.96078	12.7019	14.992	7.02564	7.89492	5.81046	1.30116	0.887381	2.35847	1.96933	3.01659	3.30518	3.52991	1.62142	1.53293	3.46305	5.32026	4.2554	3.51031	4.12217	5.72197
PSMD9	27.6103	28.2705	32.8341	20.2866	24.9952	20.3366	6.1087	11.5266	13.2287	19.4928	19.0032	13.9646	16.9775	15.5217	7.14251	4.71981	5.14976	4.38003	11.3527	3.75523	6.79549	4.11272	6.48309	31.409	45.4114	59.1224	40.5258	48.6216	42.153
tmem165	27.6061	33.1342	42.4481	44.5541	37.4194	52.9578	12.0519	12.539	17.1732	22.9275	21.4329	14.2846	8.40476	10.0574	7.04978	5.10173	9.16234	5.3842	8.57576	5.34849	12.5671	7.6342	4.83983	35.6023	39.0703	37.9091	18.9329	9.28463	13.8929
ldlrap1b	27.5782	3.57713	45.9387	2.47768	2.48447	2.28072	0	0	14.5331	0.329213	0.136593	0.39334	0	1.14359	0	0	0	0	0	0	0	0	0	0	0	0.465455	0	0.258337	0.665466
mcee	27.5505	28.9886	25.7638	36.5524	18.1257	27.4933	7.87238	13.9924	15.1333	20.8819	20.5943	18.2571	10.8724	11.1848	5.20571	2.89333	5.12952	6.8419	6.28952	4.9619	8.10667	5.62667	5.89143	13.7638	18.2514	21.2	24.5647	18.701	20.8648
ibtk	27.5482	31.1334	29.9067	61.8878	55.186	69.5284	10.3087	11.9209	33.274	35.2453	44.1064	13.9208	13.6935	12.5378	15.46	14.9607	17.1492	11.3181	15.0864	16.5558	20.5889	15.3695	11.85	21.6894	23.6521	27.6806	10.3044	11.5578	11.6413
szrd1	27.5333	38.0207	30.5494	44.8115	44.9954	55.9586	4.11264	6.60919	22.8575	16.4046	27.531	11.0207	13.2759	8.1908	118.248	78.2506	101.446	79.1724	86.0529	77.6184	127.995	126.274	95.6276	29.9494	20.3333	41.2874	13.1678	13.7632	9.82069
PSMA1	27.5324	0.584709	0.704244	41.8923	11.4578	10.1718	0.520061	0	0.100024	0.639798	0.800406	0.430739	0.272455	0.36292	0.516654	0.493481	0.528152	0.470887	0.489881	2.04275	0.446444	1.87812	0.042144	0.346353	33.1356	0.393266	0.393661	0.592712	0.455108
mpdu1b	27.5051	0	1.67215	0.842339	11.9255	1.69259	0	0.171504	1.94332	10.38	2.39855	3.8302	0	1.55878	1.06779	0	1.38912	0.453748	0	0	0	0	0.505926	0	1.97053	11.5464	21.3984	13.7245	11.5034
tmem64	27.4727	46.6064	34.2335	48.9943	29.0612	65.0796	8.03201	8.22034	8.50424	12.8447	20.4261	4.45198	6.89454	5.78531	0.370998	0.423729	0.437853	0.194915	0.917138	0	0.343691	0.437853	0.706215	4.86817	5.20998	8.86401	4.71563	4.36723	4.00565
atp6v1e1b	27.4601	20.2212	21.1106	27.5758	25.8352	16.4208	6.39282	3.05815	6.55416	7.33979	8.15279	7.61688	5.97149	4.43672	7.14082	6.4504	9.85063	4.561	5.19156	6.97206	18.1357	8.60205	6.06271	32.4493	31.2104	38.1733	43.545	44.1157	48.5627
BMPR2	27.4166	40.3647	21.1918	19.7255	29.0101	44.6214	9.12535	8.28365	15.4702	19.7122	18.9552	8.37897	7.46444	7.71252	6.50035	6.66057	6.15335	5.99988	7.33996	5.83752	9.83682	7.4613	5.48448	5.0992	5.27935	7.45537	5.52685	7.20024	5.45526
nus1	27.3924	35.2435	38.0142	83.6525	51.3629	49.6667	4.74704	6.45981	8.81442	13.526	15.7991	6.63002	7.96927	9.31087	6.43912	5.27423	5.5792	8.17731	4.83806	3.56147	7.52364	7.50591	5.44799	48.3723	44.1513	48.2801	4.35934	7.54137	7.61939
stk17b	27.3867	32.4755	28.9402	39.2529	40.2751	40.527	10.2886	6.08752	20.5116	21.7021	26.2371	10.3301	10.3134	9.21236	5.07529	6.57207	5.15701	5.24067	7.03539	5.9334	7.61905	4.61712	5.91377	15.4234	23.2445	20.8301	7.67053	6.15444	8.02896
RABL3	27.3759	47.2234	36.1449	24.8861	30.7975	27.7165	10.5468	15.6506	26.7633	23.9671	23.8918	16.0025	13.6354	9.87595	33.2244	35.4114	37.7544	33.0158	34.3854	33.4139	38.1424	43.8241	33.6399	35.6443	32.8867	48.7658	23.381	21.9873	25.8222
id1	27.3752	46.0536	27.01	3.72306	4.68788	17.0977	7.83696	5.09994	12.6762	10.2451	10.9486	6.01675	9.0067	5.5014	28.8135	32.8074	53.4199	31.9118	48.6951	42.0927	40.4132	55.0849	35.1374	7.91401	7.76214	13.6583	15.2842	10.1776	16.3875
rtraf	27.3612	36.0784	40.1102	41.5911	35.8316	50.3136	14.3549	11.0551	29.0773	23.5196	30.6324	18.2362	19.2707	15.9439	44.1102	37.1833	52.5508	36.3655	41.1181	48.6706	56.8521	49.0016	46.2564	41.1727	40.4873	50.2097	36.8263	37.2617	33.0048
chrac1	27.3557	29.6331	32.7087	45.5658	38.7703	37.5098	4.55182	9.43977	19.8263	12.7535	11.1709	10.9132	11.5714	8.57703	18.028	10.1036	20.5406	17.0448	13.874	18.7367	23.0476	13.8011	15.6218	24.1204	6.07563	20.888	19.7115	21.7815	16.098
nabp1a	27.3482	45.3044	43.7379	44.4546	53.6354	70.9554	11.5172	8.0313	18.8013	22.5055	36.9304	11.6557	10.5383	8.33333	1.99218	1.04695	3.64476	4.12833	1.8748	6.05477	5.25352	4.48983	2.56025	33.5837	47.6111	65.0767	23.5196	20.615	17.874
slc39a13	27.3464	21.0446	25.3217	206.724	186.342	158.811	10.6004	9.84644	33.8682	40.1307	41.3157	8.40075	12.0809	10.9228	8.51386	6.1633	7.29139	5.95431	6.15655	5.18127	8.2779	6.32135	5.44345	53.4884	61.0228	85.9315	8.20974	9.26779	11.3438
atp5md	27.339	36.8701	32.3503	55.1412	37.7684	29.6271	22.8588	35.9435	22.6949	38.4096	50.6751	34.1073	44.5791	38.2994	157.181	157.994	237.345	117.288	176.901	133.328	168.096	221.15	215.675	119.144	83.5876	120.5	171.381	153.782	184.74
CREM	27.2933	32.9332	43.2303	62.9441	82.4777	110.082	4.05495	6.55199	11.4396	8.91801	11.497	4.46492	2.88757	3.1809	52.2244	64.3254	61.7642	21.9966	25.9188	23.9341	15.8081	17.6407	6.86137	26.3812	25.3284	35.8588	7.30347	12.0854	7.47422
kansl1a	27.2864	35.1138	33.6975	30.6658	23.3293	31.9587	6.86377	6.95947	16.9752	16.3353	23.5532	7.89223	9.05117	6.71314	4.33491	3.70467	5.6304	4.41637	5.05269	4.03198	6.68612	6.12312	4.31092	4.70699	5.34602	7.8804	4.86417	3.83914	4.76591
rfa3	27.2756	31.2585	79.8893	20.6114	23.3447	24.9287	5.52303	14.4673	21.6345	28.1872	28.4666	13.9242	15.1887	14.688	16.6159	10.5892	9.72808	10.4948	15.3655	15.7207	17.7831	11.9242	11.4829	16.5126	18.4146	23.584	58.6449	52.815	63.2897
nop16	27.2663	40.0335	19.8935	32.286	30.6529	22.7751	11.5858	9.31854	16.2949	14.8146	17.3018	17.1341	17.2189	17.1755	51.3383	57.1834	50.6105	53.0099	54.3945	43.5602	61.5582	70.6331	51.3373	38.7495	44.9487	59.5049	52.5138	52.9093	44.8323
F2R	27.2538	16.6143	16.641	94.3805	77.2844	33.5311	9.72054	16.5702	34.1613	31.4824	31.5819	37.5791	13.0554	17.5797	4.15427	6.14692	4.8592	5.32813	4.79431	4.85614	3.11876	5.49832	3.1656	8.18396	8.77533	10.4524	4.07346	6.01102	3.71503
[truncated: 16,089 more rows]
