# Supplementary material for: A meta-analysis of public RNA-Seq data identifies conserved stress responses in rainbow trout
Source: BMC Genomics. 2025 Nov 5;26:999. doi: 10.1186/s12864-025-12127-2 (PMC12590911; doi:10.1186/s12864-025-12127-2)
Supplement: Supplementary file 3 — Supplementary material 3. [file 12864_2025_12127_MOESM3_ESM.xlsx]

## Sheet: Intersect_Meta_Cumulative
Figure 3.
Gene ID	meta Adj. P-value	meta log2FoldChange	Gene Symbol	Gene Description
ENSOMYG00000017016	3.02e-38	1.45169	cdkn1ba	cyclin dependent kinase inhibitor 1Ba
ENSOMYG00000022552	4.45e-17	1.45031	znf395a	zinc finger protein 395a
ENSOMYG00000028743	5.96e-58	2.16688	klf9	Kruppel like factor 9
ENSOMYG00000045565	5.66e-11	1.47928	irs2b (paralog)	insulin receptor substrate 2b
ENSOMYG00000059646	1.68e-200	0.643932	tsc22d3 (paralog)	TSC22 domain family member 3

## Sheet: Intersect_Cumulative_Meta
Supplementary Table S3A: Significantly expressed intersecting genes identified in the cumulative meta-analysis in Venn diagram.
Gene ID	meta Adj. P-value	meta log2FoldChange	Gene Symbol	Gene Description
ENSOMYG00000017016	3.02e-38	1.45169	cdkn1ba	cyclin dependent kinase inhibitor 1Ba
ENSOMYG00000022552	4.45e-17	1.45031	znf395a	zinc finger protein 395a
ENSOMYG00000028743	5.96e-58	2.16688	klf9	Kruppel like factor 9
ENSOMYG00000045565	5.66e-11	1.47928	irs2b (paralog)	insulin receptor substrate 2b
ENSOMYG00000059646	1.68e-200	0.643932	tsc22d3 (paralog)	TSC22 domain family member 3

## Sheet: Intersct_Meta_Heat_Stress
Figure 3B: Significantly expressed intersecting genes (including paralogs) identified in the cumulative heta stress datasets in Venn diagram.
Gene_ID	log2FoldChange	adjusted.P.Value	external_gene_name	description	omykiss_paralog_associated_gene_name	omykiss_paralog_subtype	Regulation
ENSOMYG00000000138	1.83155	0.0105271	ga45b	NA	GADD45B	Salmoninae	UP
ENSOMYG00000000138	1.83155	0.0105271	ga45b	NA	gadd45ga	Gnathostomata	UP
ENSOMYG00000000138	1.83155	0.0105271	ga45b	NA	gadd45gb.1	Gnathostomata	UP
ENSOMYG00000000138	1.83155	0.0105271	ga45b	NA	NA	Gnathostomata	UP
ENSOMYG00000000138	1.83155	0.0105271	ga45b	NA	gadd45ab	Gnathostomata	UP
ENSOMYG00000000138	1.83155	0.0105271	ga45b	NA	gadd45aa	Gnathostomata	UP
ENSOMYG00000000143	-1.33671	0.0231292	NA	NA	NA	Euteleosteomorpha	DOWN
ENSOMYG00000000143	-1.33671	0.0231292	NA	NA	NA	Euteleostomi	DOWN
ENSOMYG00000000538	1.39848	0.034899	bnip3	BCL2 interacting protein 3 [Source:ZFIN;Acc:ZDB-GENE-030131-8060]	bnip3	Oncorhynchus mykiss	UP
ENSOMYG00000000538	1.39848	0.034899	bnip3	BCL2 interacting protein 3 [Source:ZFIN;Acc:ZDB-GENE-030131-8060]	bnip3	Osteoglossocephalai	UP
ENSOMYG00000000538	1.39848	0.034899	bnip3	BCL2 interacting protein 3 [Source:ZFIN;Acc:ZDB-GENE-030131-8060]	bnip3lb	Gnathostomata	UP
ENSOMYG00000000538	1.39848	0.034899	bnip3	BCL2 interacting protein 3 [Source:ZFIN;Acc:ZDB-GENE-030131-8060]	NA	Vertebrata	UP
ENSOMYG00000000729	-3.08155	0.0214146	NA	NA	pvrl2l	Bilateria	DOWN
ENSOMYG00000000729	-3.08155	0.0214146	NA	NA	si:ch73-22o12.1	Bilateria	DOWN
ENSOMYG00000000729	-3.08155	0.0214146	NA	NA	NA	Bilateria	DOWN
ENSOMYG00000000729	-3.08155	0.0214146	NA	NA	crtam	Bilateria	DOWN
ENSOMYG00000000729	-3.08155	0.0214146	NA	NA	nectin3b	Bilateria	DOWN
ENSOMYG00000000729	-3.08155	0.0214146	NA	NA	nectin3a	Bilateria	DOWN
ENSOMYG00000000729	-3.08155	0.0214146	NA	NA	cadm1a	Bilateria	DOWN
ENSOMYG00000000729	-3.08155	0.0214146	NA	NA	cadm1b	Bilateria	DOWN
ENSOMYG00000000729	-3.08155	0.0214146	NA	NA	nectin4b	Bilateria	DOWN
ENSOMYG00000000729	-3.08155	0.0214146	NA	NA	cadm2b	Bilateria	DOWN
ENSOMYG00000000729	-3.08155	0.0214146	NA	NA	cadm4	Bilateria	DOWN
ENSOMYG00000000729	-3.08155	0.0214146	NA	NA	cd226	Bilateria	DOWN
ENSOMYG00000000729	-3.08155	0.0214146	NA	NA	cadm3	Bilateria	DOWN
ENSOMYG00000000729	-3.08155	0.0214146	NA	NA	NA	Oncorhynchus mykiss	DOWN
ENSOMYG00000000729	-3.08155	0.0214146	NA	NA	NA	Salmoninae	DOWN
ENSOMYG00000000729	-3.08155	0.0214146	NA	NA	NA	Euteleostomi	DOWN
ENSOMYG00000000849	1.41674	4.69685e-05	NA	NA	NA	NA	UP
ENSOMYG00000000868	-1.41899	0.0143587	NA	NA	NA	Salmoninae	DOWN
ENSOMYG00000000868	-1.41899	0.0143587	NA	NA	NA	Opisthokonta	DOWN
ENSOMYG00000000868	-1.41899	0.0143587	NA	NA	bub1bb	Opisthokonta	DOWN
ENSOMYG00000000878	1.04914	0.0352505	rab11al	RAB11a, member RAS oncogene family, like [Source:ZFIN;Acc:ZDB-GENE-031118-188]	rab25b	Opisthokonta	UP
ENSOMYG00000000878	1.04914	0.0352505	rab11al	RAB11a, member RAS oncogene family, like [Source:ZFIN;Acc:ZDB-GENE-031118-188]	NA	Opisthokonta	UP
ENSOMYG00000000878	1.04914	0.0352505	rab11al	RAB11a, member RAS oncogene family, like [Source:ZFIN;Acc:ZDB-GENE-031118-188]	rab34a	Opisthokonta	UP
ENSOMYG00000000878	1.04914	0.0352505	rab11al	RAB11a, member RAS oncogene family, like [Source:ZFIN;Acc:ZDB-GENE-031118-188]	RAB34	Opisthokonta	UP
ENSOMYG00000000878	1.04914	0.0352505	rab11al	RAB11a, member RAS oncogene family, like [Source:ZFIN;Acc:ZDB-GENE-031118-188]	rab11ba	Opisthokonta	UP
ENSOMYG00000000878	1.04914	0.0352505	rab11al	RAB11a, member RAS oncogene family, like [Source:ZFIN;Acc:ZDB-GENE-031118-188]	rb11a	Opisthokonta	UP
ENSOMYG00000000878	1.04914	0.0352505	rab11al	RAB11a, member RAS oncogene family, like [Source:ZFIN;Acc:ZDB-GENE-031118-188]	rab32a	Opisthokonta	UP
ENSOMYG00000000878	1.04914	0.0352505	rab11al	RAB11a, member RAS oncogene family, like [Source:ZFIN;Acc:ZDB-GENE-031118-188]	rab32b	Opisthokonta	UP
ENSOMYG00000000878	1.04914	0.0352505	rab11al	RAB11a, member RAS oncogene family, like [Source:ZFIN;Acc:ZDB-GENE-031118-188]	rab3aa	Opisthokonta	UP
ENSOMYG00000000878	1.04914	0.0352505	rab11al	RAB11a, member RAS oncogene family, like [Source:ZFIN;Acc:ZDB-GENE-031118-188]	rab3ab	Opisthokonta	UP
ENSOMYG00000000878	1.04914	0.0352505	rab11al	RAB11a, member RAS oncogene family, like [Source:ZFIN;Acc:ZDB-GENE-031118-188]	rab3c	Opisthokonta	UP
ENSOMYG00000000878	1.04914	0.0352505	rab11al	RAB11a, member RAS oncogene family, like [Source:ZFIN;Acc:ZDB-GENE-031118-188]	RAB3C	Opisthokonta	UP
ENSOMYG00000000878	1.04914	0.0352505	rab11al	RAB11a, member RAS oncogene family, like [Source:ZFIN;Acc:ZDB-GENE-031118-188]	RAB17	Opisthokonta	UP
ENSOMYG00000000878	1.04914	0.0352505	rab11al	RAB11a, member RAS oncogene family, like [Source:ZFIN;Acc:ZDB-GENE-031118-188]	rab13	Opisthokonta	UP
ENSOMYG00000000878	1.04914	0.0352505	rab11al	RAB11a, member RAS oncogene family, like [Source:ZFIN;Acc:ZDB-GENE-031118-188]	rab5aa	Opisthokonta	UP
ENSOMYG00000000878	1.04914	0.0352505	rab11al	RAB11a, member RAS oncogene family, like [Source:ZFIN;Acc:ZDB-GENE-031118-188]	rab5ab	Opisthokonta	UP
ENSOMYG00000000878	1.04914	0.0352505	rab11al	RAB11a, member RAS oncogene family, like [Source:ZFIN;Acc:ZDB-GENE-031118-188]	rab11a	Opisthokonta	UP
ENSOMYG00000000878	1.04914	0.0352505	rab11al	RAB11a, member RAS oncogene family, like [Source:ZFIN;Acc:ZDB-GENE-031118-188]	RAB11A	Opisthokonta	UP
ENSOMYG00000000878	1.04914	0.0352505	rab11al	RAB11a, member RAS oncogene family, like [Source:ZFIN;Acc:ZDB-GENE-031118-188]	RAB38	Opisthokonta	UP
ENSOMYG00000000878	1.04914	0.0352505	rab11al	RAB11a, member RAS oncogene family, like [Source:ZFIN;Acc:ZDB-GENE-031118-188]	rab33a	Opisthokonta	UP
ENSOMYG00000000878	1.04914	0.0352505	rab11al	RAB11a, member RAS oncogene family, like [Source:ZFIN;Acc:ZDB-GENE-031118-188]	rabl2	Opisthokonta	UP
ENSOMYG00000000878	1.04914	0.0352505	rab11al	RAB11a, member RAS oncogene family, like [Source:ZFIN;Acc:ZDB-GENE-031118-188]	rab20	Opisthokonta	UP
ENSOMYG00000000878	1.04914	0.0352505	rab11al	RAB11a, member RAS oncogene family, like [Source:ZFIN;Acc:ZDB-GENE-031118-188]	rab40c	Opisthokonta	UP
ENSOMYG00000000878	1.04914	0.0352505	rab11al	RAB11a, member RAS oncogene family, like [Source:ZFIN;Acc:ZDB-GENE-031118-188]	rab8a	Opisthokonta	UP
ENSOMYG00000000878	1.04914	0.0352505	rab11al	RAB11a, member RAS oncogene family, like [Source:ZFIN;Acc:ZDB-GENE-031118-188]	rab9b	Opisthokonta	UP
ENSOMYG00000000878	1.04914	0.0352505	rab11al	RAB11a, member RAS oncogene family, like [Source:ZFIN;Acc:ZDB-GENE-031118-188]	rab36	Opisthokonta	UP
ENSOMYG00000000878	1.04914	0.0352505	rab11al	RAB11a, member RAS oncogene family, like [Source:ZFIN;Acc:ZDB-GENE-031118-188]	RAB28	Opisthokonta	UP
ENSOMYG00000000878	1.04914	0.0352505	rab11al	RAB11a, member RAS oncogene family, like [Source:ZFIN;Acc:ZDB-GENE-031118-188]	zgc:162171	Opisthokonta	UP
ENSOMYG00000000878	1.04914	0.0352505	rab11al	RAB11a, member RAS oncogene family, like [Source:ZFIN;Acc:ZDB-GENE-031118-188]	rab38c	Opisthokonta	UP
ENSOMYG00000000878	1.04914	0.0352505	rab11al	RAB11a, member RAS oncogene family, like [Source:ZFIN;Acc:ZDB-GENE-031118-188]	RAB5C	Opisthokonta	UP
ENSOMYG00000000878	1.04914	0.0352505	rab11al	RAB11a, member RAS oncogene family, like [Source:ZFIN;Acc:ZDB-GENE-031118-188]	rab5c	Opisthokonta	UP
ENSOMYG00000000878	1.04914	0.0352505	rab11al	RAB11a, member RAS oncogene family, like [Source:ZFIN;Acc:ZDB-GENE-031118-188]	rab11bb	Opisthokonta	UP
ENSOMYG00000000878	1.04914	0.0352505	rab11al	RAB11a, member RAS oncogene family, like [Source:ZFIN;Acc:ZDB-GENE-031118-188]	rab6bb	Opisthokonta	UP
ENSOMYG00000000878	1.04914	0.0352505	rab11al	RAB11a, member RAS oncogene family, like [Source:ZFIN;Acc:ZDB-GENE-031118-188]	rab6ba	Opisthokonta	UP
ENSOMYG00000000878	1.04914	0.0352505	rab11al	RAB11a, member RAS oncogene family, like [Source:ZFIN;Acc:ZDB-GENE-031118-188]	rab3b	Opisthokonta	UP
ENSOMYG00000000878	1.04914	0.0352505	rab11al	RAB11a, member RAS oncogene family, like [Source:ZFIN;Acc:ZDB-GENE-031118-188]	dnajc27	Opisthokonta	UP
ENSOMYG00000000878	1.04914	0.0352505	rab11al	RAB11a, member RAS oncogene family, like [Source:ZFIN;Acc:ZDB-GENE-031118-188]	rab12	Opisthokonta	UP
ENSOMYG00000000878	1.04914	0.0352505	rab11al	RAB11a, member RAS oncogene family, like [Source:ZFIN;Acc:ZDB-GENE-031118-188]	rab30	Opisthokonta	UP
ENSOMYG00000000878	1.04914	0.0352505	rab11al	RAB11a, member RAS oncogene family, like [Source:ZFIN;Acc:ZDB-GENE-031118-188]	rab18a	Opisthokonta	UP
ENSOMYG00000000878	1.04914	0.0352505	rab11al	RAB11a, member RAS oncogene family, like [Source:ZFIN;Acc:ZDB-GENE-031118-188]	rab5b	Opisthokonta	UP
ENSOMYG00000000878	1.04914	0.0352505	rab11al	RAB11a, member RAS oncogene family, like [Source:ZFIN;Acc:ZDB-GENE-031118-188]	si:dkey-16l2.16	Opisthokonta	UP
ENSOMYG00000000878	1.04914	0.0352505	rab11al	RAB11a, member RAS oncogene family, like [Source:ZFIN;Acc:ZDB-GENE-031118-188]	rab43	Opisthokonta	UP
ENSOMYG00000000878	1.04914	0.0352505	rab11al	RAB11a, member RAS oncogene family, like [Source:ZFIN;Acc:ZDB-GENE-031118-188]	RAB9A	Opisthokonta	UP
ENSOMYG00000000878	1.04914	0.0352505	rab11al	RAB11a, member RAS oncogene family, like [Source:ZFIN;Acc:ZDB-GENE-031118-188]	RAB27A	Opisthokonta	UP
ENSOMYG00000000878	1.04914	0.0352505	rab11al	RAB11a, member RAS oncogene family, like [Source:ZFIN;Acc:ZDB-GENE-031118-188]	rab3db	Opisthokonta	UP
ENSOMYG00000000878	1.04914	0.0352505	rab11al	RAB11a, member RAS oncogene family, like [Source:ZFIN;Acc:ZDB-GENE-031118-188]	rab22a	Opisthokonta	UP
ENSOMYG00000000878	1.04914	0.0352505	rab11al	RAB11a, member RAS oncogene family, like [Source:ZFIN;Acc:ZDB-GENE-031118-188]	rab4b	Opisthokonta	UP
ENSOMYG00000000878	1.04914	0.0352505	rab11al	RAB11a, member RAS oncogene family, like [Source:ZFIN;Acc:ZDB-GENE-031118-188]	rab42a	Opisthokonta	UP
ENSOMYG00000000878	1.04914	0.0352505	rab11al	RAB11a, member RAS oncogene family, like [Source:ZFIN;Acc:ZDB-GENE-031118-188]	RAB27B	Opisthokonta	UP
ENSOMYG00000000878	1.04914	0.0352505	rab11al	RAB11a, member RAS oncogene family, like [Source:ZFIN;Acc:ZDB-GENE-031118-188]	rab33ba	Opisthokonta	UP
ENSOMYG00000000878	1.04914	0.0352505	rab11al	RAB11a, member RAS oncogene family, like [Source:ZFIN;Acc:ZDB-GENE-031118-188]	rab23	Opisthokonta	UP
ENSOMYG00000000878	1.04914	0.0352505	rab11al	RAB11a, member RAS oncogene family, like [Source:ZFIN;Acc:ZDB-GENE-031118-188]	rab40b	Opisthokonta	UP
ENSOMYG00000000878	1.04914	0.0352505	rab11al	RAB11a, member RAS oncogene family, like [Source:ZFIN;Acc:ZDB-GENE-031118-188]	RAB31	Opisthokonta	UP
ENSOMYG00000000878	1.04914	0.0352505	rab11al	RAB11a, member RAS oncogene family, like [Source:ZFIN;Acc:ZDB-GENE-031118-188]	RAB24	Opisthokonta	UP
ENSOMYG00000000878	1.04914	0.0352505	rab11al	RAB11a, member RAS oncogene family, like [Source:ZFIN;Acc:ZDB-GENE-031118-188]	rab24	Opisthokonta	UP
ENSOMYG00000000878	1.04914	0.0352505	rab11al	RAB11a, member RAS oncogene family, like [Source:ZFIN;Acc:ZDB-GENE-031118-188]	rab2a	Opisthokonta	UP
ENSOMYG00000000878	1.04914	0.0352505	rab11al	RAB11a, member RAS oncogene family, like [Source:ZFIN;Acc:ZDB-GENE-031118-188]	rab41	Opisthokonta	UP
ENSOMYG00000000878	1.04914	0.0352505	rab11al	RAB11a, member RAS oncogene family, like [Source:ZFIN;Acc:ZDB-GENE-031118-188]	rab6a	Opisthokonta	UP
ENSOMYG00000000878	1.04914	0.0352505	rab11al	RAB11a, member RAS oncogene family, like [Source:ZFIN;Acc:ZDB-GENE-031118-188]	rab35b	Opisthokonta	UP
ENSOMYG00000000878	1.04914	0.0352505	rab11al	RAB11a, member RAS oncogene family, like [Source:ZFIN;Acc:ZDB-GENE-031118-188]	rab15	Opisthokonta	UP
ENSOMYG00000000878	1.04914	0.0352505	rab11al	RAB11a, member RAS oncogene family, like [Source:ZFIN;Acc:ZDB-GENE-031118-188]	rab7b	Opisthokonta	UP
ENSOMYG00000000878	1.04914	0.0352505	rab11al	RAB11a, member RAS oncogene family, like [Source:ZFIN;Acc:ZDB-GENE-031118-188]	RAB7A	Opisthokonta	UP
ENSOMYG00000000878	1.04914	0.0352505	rab11al	RAB11a, member RAS oncogene family, like [Source:ZFIN;Acc:ZDB-GENE-031118-188]	rab7a	Opisthokonta	UP
ENSOMYG00000000878	1.04914	0.0352505	rab11al	RAB11a, member RAS oncogene family, like [Source:ZFIN;Acc:ZDB-GENE-031118-188]	rab4a	Opisthokonta	UP
ENSOMYG00000000878	1.04914	0.0352505	rab11al	RAB11a, member RAS oncogene family, like [Source:ZFIN;Acc:ZDB-GENE-031118-188]	rasef2	Opisthokonta	UP
ENSOMYG00000000878	1.04914	0.0352505	rab11al	RAB11a, member RAS oncogene family, like [Source:ZFIN;Acc:ZDB-GENE-031118-188]	rab11al	Salmoninae	UP
ENSOMYG00000000994	-1.84695	0.00502094	wt-t1b	WT1 transcription factor a [Source:ZFIN;Acc:ZDB-GENE-980526-558]	wt-t1a	Salmoninae	DOWN
ENSOMYG00000000994	-1.84695	0.00502094	wt-t1b	WT1 transcription factor a [Source:ZFIN;Acc:ZDB-GENE-980526-558]	wt1b	Gnathostomata	DOWN
ENSOMYG00000000994	-1.84695	0.00502094	wt-t1b	WT1 transcription factor a [Source:ZFIN;Acc:ZDB-GENE-980526-558]	NA	Opisthokonta	DOWN
ENSOMYG00000000994	-1.84695	0.00502094	wt-t1b	WT1 transcription factor a [Source:ZFIN;Acc:ZDB-GENE-980526-558]	egr3	Opisthokonta	DOWN
ENSOMYG00000000994	-1.84695	0.00502094	wt-t1b	WT1 transcription factor a [Source:ZFIN;Acc:ZDB-GENE-980526-558]	EGR2	Opisthokonta	DOWN
ENSOMYG00000000994	-1.84695	0.00502094	wt-t1b	WT1 transcription factor a [Source:ZFIN;Acc:ZDB-GENE-980526-558]	egr2b	Opisthokonta	DOWN
ENSOMYG00000000994	-1.84695	0.00502094	wt-t1b	WT1 transcription factor a [Source:ZFIN;Acc:ZDB-GENE-980526-558]	egr1	Opisthokonta	DOWN
ENSOMYG00000001039	-1.22186	0.0182033	plin3	perilipin 3 [Source:ZFIN;Acc:ZDB-GENE-030131-7218]	plin3	Salmoninae	DOWN
ENSOMYG00000001039	-1.22186	0.0182033	plin3	perilipin 3 [Source:ZFIN;Acc:ZDB-GENE-030131-7218]	NA	Vertebrata	DOWN
ENSOMYG00000001039	-1.22186	0.0182033	plin3	perilipin 3 [Source:ZFIN;Acc:ZDB-GENE-030131-7218]	plin6	Vertebrata	DOWN
ENSOMYG00000001219	-2.35912	7.86546e-07	gins1	GINS complex subunit 1 (Psf1 homolog) [Source:ZFIN;Acc:ZDB-GENE-041010-184]	NA	NA	DOWN
ENSOMYG00000001306	-1.31963	0.00234746	phf19	PHD finger protein 19 [Source:ZFIN;Acc:ZDB-GENE-081105-128]	phf19	Salmoninae	DOWN
ENSOMYG00000001306	-1.31963	0.00234746	phf19	PHD finger protein 19 [Source:ZFIN;Acc:ZDB-GENE-081105-128]	NA	Gnathostomata	DOWN
ENSOMYG00000001306	-1.31963	0.00234746	phf19	PHD finger protein 19 [Source:ZFIN;Acc:ZDB-GENE-081105-128]	mtf2	Gnathostomata	DOWN
ENSOMYG00000001373	-1.68188	1.01674e-05	NA	NA	NA	Salmoninae	DOWN
ENSOMYG00000001673	2.65582	8.60631e-05	tmem269	transmembrane protein 269 [Source:ZFIN;Acc:ZDB-GENE-090313-227]	tmem269	Salmoninae	UP
ENSOMYG00000001673	2.65582	8.60631e-05	tmem269	transmembrane protein 269 [Source:ZFIN;Acc:ZDB-GENE-090313-227]	cdipt	Opisthokonta	UP
ENSOMYG00000001753	-1.7336	4.38125e-07	NA	NA	mcm6l	Vertebrata	DOWN
ENSOMYG00000001753	-1.7336	4.38125e-07	NA	NA	mcm5	Opisthokonta	DOWN
ENSOMYG00000001753	-1.7336	4.38125e-07	NA	NA	mcm2	Opisthokonta	DOWN
ENSOMYG00000001753	-1.7336	4.38125e-07	NA	NA	mcm3	Opisthokonta	DOWN
ENSOMYG00000001753	-1.7336	4.38125e-07	NA	NA	mcm3l	Opisthokonta	DOWN
ENSOMYG00000001753	-1.7336	4.38125e-07	NA	NA	NA	Opisthokonta	DOWN
ENSOMYG00000001753	-1.7336	4.38125e-07	NA	NA	MCMDC2	Opisthokonta	DOWN
ENSOMYG00000001753	-1.7336	4.38125e-07	NA	NA	mcm9	Opisthokonta	DOWN
ENSOMYG00000001753	-1.7336	4.38125e-07	NA	NA	mcm4	Opisthokonta	DOWN
ENSOMYG00000001782	-1.09098	0.000137036	NA	NA	phgdh	Salmoninae	DOWN
ENSOMYG00000001782	-1.09098	0.000137036	NA	NA	NA	Opisthokonta	DOWN
ENSOMYG00000001782	-1.09098	0.000137036	NA	NA	CTBP1	Opisthokonta	DOWN
ENSOMYG00000001782	-1.09098	0.000137036	NA	NA	zgc:136493	Opisthokonta	DOWN
ENSOMYG00000001782	-1.09098	0.000137036	NA	NA	ctbp2a	Opisthokonta	DOWN
ENSOMYG00000001782	-1.09098	0.000137036	NA	NA	CTBP2	Opisthokonta	DOWN
ENSOMYG00000001986	-1.46399	0.00840777	NA	NA	NA	Salmoninae	DOWN
ENSOMYG00000001986	-1.46399	0.00840777	NA	NA	prc1b	Osteoglossocephalai	DOWN
ENSOMYG00000001986	-1.46399	0.00840777	NA	NA	zgc:86764	Gnathostomata	DOWN
ENSOMYG00000001999	-1.90224	0.00142382	NA	NA	lemd3	Opisthokonta	DOWN
ENSOMYG00000002209	-1.48345	0.0305257	hmgb3a	high mobility group box 3a [Source:ZFIN;Acc:ZDB-GENE-050428-1]	hmgb3a	Salmoninae	DOWN
ENSOMYG00000002209	-1.48345	0.0305257	hmgb3a	high mobility group box 3a [Source:ZFIN;Acc:ZDB-GENE-050428-1]	hmgb3b	Osteoglossocephalai	DOWN
ENSOMYG00000002209	-1.48345	0.0305257	hmgb3a	high mobility group box 3a [Source:ZFIN;Acc:ZDB-GENE-050428-1]	NA	Vertebrata	DOWN
ENSOMYG00000002209	-1.48345	0.0305257	hmgb3a	high mobility group box 3a [Source:ZFIN;Acc:ZDB-GENE-050428-1]	hmgb2b	Vertebrata	DOWN
ENSOMYG00000002209	-1.48345	0.0305257	hmgb3a	high mobility group box 3a [Source:ZFIN;Acc:ZDB-GENE-050428-1]	NA	Bilateria	DOWN
ENSOMYG00000002209	-1.48345	0.0305257	hmgb3a	high mobility group box 3a [Source:ZFIN;Acc:ZDB-GENE-050428-1]	hmgb1b	Bilateria	DOWN
ENSOMYG00000002209	-1.48345	0.0305257	hmgb3a	high mobility group box 3a [Source:ZFIN;Acc:ZDB-GENE-050428-1]	ssrp1a	Bilateria	DOWN
ENSOMYG00000002209	-1.48345	0.0305257	hmgb3a	high mobility group box 3a [Source:ZFIN;Acc:ZDB-GENE-050428-1]	SMARCE1	Bilateria	DOWN
ENSOMYG00000002209	-1.48345	0.0305257	hmgb3a	high mobility group box 3a [Source:ZFIN;Acc:ZDB-GENE-050428-1]	tox3	Bilateria	DOWN
ENSOMYG00000002209	-1.48345	0.0305257	hmgb3a	high mobility group box 3a [Source:ZFIN;Acc:ZDB-GENE-050428-1]	tox	Bilateria	DOWN
ENSOMYG00000002209	-1.48345	0.0305257	hmgb3a	high mobility group box 3a [Source:ZFIN;Acc:ZDB-GENE-050428-1]	hmgb2a	Bilateria	DOWN
ENSOMYG00000002209	-1.48345	0.0305257	hmgb3a	high mobility group box 3a [Source:ZFIN;Acc:ZDB-GENE-050428-1]	hmgxb4a	Bilateria	DOWN
ENSOMYG00000002209	-1.48345	0.0305257	hmgb3a	high mobility group box 3a [Source:ZFIN;Acc:ZDB-GENE-050428-1]	tox2	Bilateria	DOWN
ENSOMYG00000002209	-1.48345	0.0305257	hmgb3a	high mobility group box 3a [Source:ZFIN;Acc:ZDB-GENE-050428-1]	hmg20b	Bilateria	DOWN
ENSOMYG00000002209	-1.48345	0.0305257	hmgb3a	high mobility group box 3a [Source:ZFIN;Acc:ZDB-GENE-050428-1]	tox4b	Bilateria	DOWN
ENSOMYG00000002209	-1.48345	0.0305257	hmgb3a	high mobility group box 3a [Source:ZFIN;Acc:ZDB-GENE-050428-1]	tox4a	Bilateria	DOWN
ENSOMYG00000002209	-1.48345	0.0305257	hmgb3a	high mobility group box 3a [Source:ZFIN;Acc:ZDB-GENE-050428-1]	ubtf	Bilateria	DOWN
ENSOMYG00000002278	1.66609	3.07923e-05	NA	NA	NA	Salmoninae	UP
ENSOMYG00000002278	1.66609	3.07923e-05	NA	NA	NA	Clupeocephala	UP
ENSOMYG00000002278	1.66609	3.07923e-05	NA	NA	FILIP1	Gnathostomata	UP
ENSOMYG00000002278	1.66609	3.07923e-05	NA	NA	luzp1	Vertebrata	UP
ENSOMYG00000002278	1.66609	3.07923e-05	NA	NA	NA	Vertebrata	UP
ENSOMYG00000002278	1.66609	3.07923e-05	NA	NA	cttnbp2nlb	Bilateria	UP
ENSOMYG00000002278	1.66609	3.07923e-05	NA	NA	cttnbp2nla	Bilateria	UP
ENSOMYG00000002443	-1.84105	0.0483828	NA	NA	NA	Bilateria	DOWN
ENSOMYG00000002443	-1.84105	0.0483828	NA	NA	NA	Salmoninae	DOWN
ENSOMYG00000002596	1.26648	0.023184	serpine1	serpin peptidase inhibitor, clade E (nexin, plasminogen activator inhibitor type 1), member 1 [Source:ZFIN;Acc:ZDB-GENE-070912-60]	serpine1	Salmoninae	UP
ENSOMYG00000002596	1.26648	0.023184	serpine1	serpin peptidase inhibitor, clade E (nexin, plasminogen activator inhibitor type 1), member 1 [Source:ZFIN;Acc:ZDB-GENE-070912-60]	NA	Bilateria	UP
ENSOMYG00000002596	1.26648	0.023184	serpine1	serpin peptidase inhibitor, clade E (nexin, plasminogen activator inhibitor type 1), member 1 [Source:ZFIN;Acc:ZDB-GENE-070912-60]	serpinf2	Bilateria	UP
ENSOMYG00000002596	1.26648	0.023184	serpine1	serpin peptidase inhibitor, clade E (nexin, plasminogen activator inhibitor type 1), member 1 [Source:ZFIN;Acc:ZDB-GENE-070912-60]	serpinf2a	Bilateria	UP
ENSOMYG00000002596	1.26648	0.023184	serpine1	serpin peptidase inhibitor, clade E (nexin, plasminogen activator inhibitor type 1), member 1 [Source:ZFIN;Acc:ZDB-GENE-070912-60]	agt	Bilateria	UP
ENSOMYG00000002596	1.26648	0.023184	serpine1	serpin peptidase inhibitor, clade E (nexin, plasminogen activator inhibitor type 1), member 1 [Source:ZFIN;Acc:ZDB-GENE-070912-60]	serpini1	Bilateria	UP
ENSOMYG00000002596	1.26648	0.023184	serpine1	serpin peptidase inhibitor, clade E (nexin, plasminogen activator inhibitor type 1), member 1 [Source:ZFIN;Acc:ZDB-GENE-070912-60]	serpinc1	Bilateria	UP
ENSOMYG00000002596	1.26648	0.023184	serpine1	serpin peptidase inhibitor, clade E (nexin, plasminogen activator inhibitor type 1), member 1 [Source:ZFIN;Acc:ZDB-GENE-070912-60]	SERPINA10	Bilateria	UP
ENSOMYG00000002596	1.26648	0.023184	serpine1	serpin peptidase inhibitor, clade E (nexin, plasminogen activator inhibitor type 1), member 1 [Source:ZFIN;Acc:ZDB-GENE-070912-60]	antiprot1	Bilateria	UP
ENSOMYG00000002596	1.26648	0.023184	serpine1	serpin peptidase inhibitor, clade E (nexin, plasminogen activator inhibitor type 1), member 1 [Source:ZFIN;Acc:ZDB-GENE-070912-60]	serpine2	Bilateria	UP
ENSOMYG00000002596	1.26648	0.023184	serpine1	serpin peptidase inhibitor, clade E (nexin, plasminogen activator inhibitor type 1), member 1 [Source:ZFIN;Acc:ZDB-GENE-070912-60]	serpinf1	Bilateria	UP
ENSOMYG00000002596	1.26648	0.023184	serpine1	serpin peptidase inhibitor, clade E (nexin, plasminogen activator inhibitor type 1), member 1 [Source:ZFIN;Acc:ZDB-GENE-070912-60]	serping1	Bilateria	UP
ENSOMYG00000002596	1.26648	0.023184	serpine1	serpin peptidase inhibitor, clade E (nexin, plasminogen activator inhibitor type 1), member 1 [Source:ZFIN;Acc:ZDB-GENE-070912-60]	serpinh1a	Bilateria	UP
ENSOMYG00000002596	1.26648	0.023184	serpine1	serpin peptidase inhibitor, clade E (nexin, plasminogen activator inhibitor type 1), member 1 [Source:ZFIN;Acc:ZDB-GENE-070912-60]	serpinh1b	Bilateria	UP
ENSOMYG00000002596	1.26648	0.023184	serpine1	serpin peptidase inhibitor, clade E (nexin, plasminogen activator inhibitor type 1), member 1 [Source:ZFIN;Acc:ZDB-GENE-070912-60]	hsp47	Bilateria	UP
ENSOMYG00000002634	-1.06373	0.0254192	ntd5	ntl-dependent gene 5 [Source:ZFIN;Acc:ZDB-GENE-031030-7]	cfh	Euteleostomi	DOWN
ENSOMYG00000002634	-1.06373	0.0254192	ntd5	ntl-dependent gene 5 [Source:ZFIN;Acc:ZDB-GENE-031030-7]	NA	Euteleostomi	DOWN
ENSOMYG00000002634	-1.06373	0.0254192	ntd5	ntl-dependent gene 5 [Source:ZFIN;Acc:ZDB-GENE-031030-7]	NA	Gnathostomata	DOWN
ENSOMYG00000002634	-1.06373	0.0254192	ntd5	ntl-dependent gene 5 [Source:ZFIN;Acc:ZDB-GENE-031030-7]	si:ch1073-280e3.1	Bilateria	DOWN
ENSOMYG00000002634	-1.06373	0.0254192	ntd5	ntl-dependent gene 5 [Source:ZFIN;Acc:ZDB-GENE-031030-7]	prf1.6	Bilateria	DOWN
ENSOMYG00000002634	-1.06373	0.0254192	ntd5	ntl-dependent gene 5 [Source:ZFIN;Acc:ZDB-GENE-031030-7]	prf1.3	Bilateria	DOWN
ENSOMYG00000002634	-1.06373	0.0254192	ntd5	ntl-dependent gene 5 [Source:ZFIN;Acc:ZDB-GENE-031030-7]	NA	Bilateria	DOWN
ENSOMYG00000002634	-1.06373	0.0254192	ntd5	ntl-dependent gene 5 [Source:ZFIN;Acc:ZDB-GENE-031030-7]	prf1	Bilateria	DOWN
ENSOMYG00000002634	-1.06373	0.0254192	ntd5	ntl-dependent gene 5 [Source:ZFIN;Acc:ZDB-GENE-031030-7]	c8a	Bilateria	DOWN
ENSOMYG00000002634	-1.06373	0.0254192	ntd5	ntl-dependent gene 5 [Source:ZFIN;Acc:ZDB-GENE-031030-7]	svep1	Bilateria	DOWN
ENSOMYG00000002634	-1.06373	0.0254192	ntd5	ntl-dependent gene 5 [Source:ZFIN;Acc:ZDB-GENE-031030-7]	sez6a	Bilateria	DOWN
ENSOMYG00000002634	-1.06373	0.0254192	ntd5	ntl-dependent gene 5 [Source:ZFIN;Acc:ZDB-GENE-031030-7]	sez6b	Bilateria	DOWN
ENSOMYG00000002634	-1.06373	0.0254192	ntd5	ntl-dependent gene 5 [Source:ZFIN;Acc:ZDB-GENE-031030-7]	susd6	Bilateria	DOWN
ENSOMYG00000002634	-1.06373	0.0254192	ntd5	ntl-dependent gene 5 [Source:ZFIN;Acc:ZDB-GENE-031030-7]	c7a	Bilateria	DOWN
ENSOMYG00000002634	-1.06373	0.0254192	ntd5	ntl-dependent gene 5 [Source:ZFIN;Acc:ZDB-GENE-031030-7]	c7b	Bilateria	DOWN
ENSOMYG00000002634	-1.06373	0.0254192	ntd5	ntl-dependent gene 5 [Source:ZFIN;Acc:ZDB-GENE-031030-7]	c9	Bilateria	DOWN
ENSOMYG00000002634	-1.06373	0.0254192	ntd5	ntl-dependent gene 5 [Source:ZFIN;Acc:ZDB-GENE-031030-7]	cfbl	Bilateria	DOWN
ENSOMYG00000002634	-1.06373	0.0254192	ntd5	ntl-dependent gene 5 [Source:ZFIN;Acc:ZDB-GENE-031030-7]	CSMD1	Bilateria	DOWN
ENSOMYG00000002634	-1.06373	0.0254192	ntd5	ntl-dependent gene 5 [Source:ZFIN;Acc:ZDB-GENE-031030-7]	c6	Bilateria	DOWN
ENSOMYG00000002634	-1.06373	0.0254192	ntd5	ntl-dependent gene 5 [Source:ZFIN;Acc:ZDB-GENE-031030-7]	srpx	Bilateria	DOWN
ENSOMYG00000002634	-1.06373	0.0254192	ntd5	ntl-dependent gene 5 [Source:ZFIN;Acc:ZDB-GENE-031030-7]	SRPX	Bilateria	DOWN
ENSOMYG00000002634	-1.06373	0.0254192	ntd5	ntl-dependent gene 5 [Source:ZFIN;Acc:ZDB-GENE-031030-7]	sele	Bilateria	DOWN
ENSOMYG00000002634	-1.06373	0.0254192	ntd5	ntl-dependent gene 5 [Source:ZFIN;Acc:ZDB-GENE-031030-7]	pappa2	Bilateria	DOWN
ENSOMYG00000002634	-1.06373	0.0254192	ntd5	ntl-dependent gene 5 [Source:ZFIN;Acc:ZDB-GENE-031030-7]	pappaa	Bilateria	DOWN
ENSOMYG00000002634	-1.06373	0.0254192	ntd5	ntl-dependent gene 5 [Source:ZFIN;Acc:ZDB-GENE-031030-7]	prf1.7	Bilateria	DOWN
ENSOMYG00000002634	-1.06373	0.0254192	ntd5	ntl-dependent gene 5 [Source:ZFIN;Acc:ZDB-GENE-031030-7]	c4bp	Bilateria	DOWN
ENSOMYG00000002634	-1.06373	0.0254192	ntd5	ntl-dependent gene 5 [Source:ZFIN;Acc:ZDB-GENE-031030-7]	SEZ6L	Bilateria	DOWN
ENSOMYG00000002634	-1.06373	0.0254192	ntd5	ntl-dependent gene 5 [Source:ZFIN;Acc:ZDB-GENE-031030-7]	APOH	Bilateria	DOWN
ENSOMYG00000002634	-1.06373	0.0254192	ntd5	ntl-dependent gene 5 [Source:ZFIN;Acc:ZDB-GENE-031030-7]	c8b	Bilateria	DOWN
ENSOMYG00000002752	-1.51975	0.0134344	NA	NA	NA	Salmoninae	DOWN
ENSOMYG00000002818	-1.31956	0.0185367	pitpnc1b	phosphatidylinositol transfer protein cytoplasmic 1b [Source:ZFIN;Acc:ZDB-GENE-041114-158]	pitpnc1b	Oncorhynchus	DOWN
ENSOMYG00000002818	-1.31956	0.0185367	pitpnc1b	phosphatidylinositol transfer protein cytoplasmic 1b [Source:ZFIN;Acc:ZDB-GENE-041114-158]	NA	Vertebrata	DOWN
ENSOMYG00000002818	-1.31956	0.0185367	pitpnc1b	phosphatidylinositol transfer protein cytoplasmic 1b [Source:ZFIN;Acc:ZDB-GENE-041114-158]	NA	Bilateria	DOWN
ENSOMYG00000002818	-1.31956	0.0185367	pitpnc1b	phosphatidylinositol transfer protein cytoplasmic 1b [Source:ZFIN;Acc:ZDB-GENE-041114-158]	PITPNM2	Bilateria	DOWN
ENSOMYG00000002818	-1.31956	0.0185367	pitpnc1b	phosphatidylinositol transfer protein cytoplasmic 1b [Source:ZFIN;Acc:ZDB-GENE-041114-158]	pitpnaa	Bilateria	DOWN
ENSOMYG00000002818	-1.31956	0.0185367	pitpnc1b	phosphatidylinositol transfer protein cytoplasmic 1b [Source:ZFIN;Acc:ZDB-GENE-041114-158]	pitpnab	Bilateria	DOWN
ENSOMYG00000002818	-1.31956	0.0185367	pitpnc1b	phosphatidylinositol transfer protein cytoplasmic 1b [Source:ZFIN;Acc:ZDB-GENE-041114-158]	PITPNC1	Bilateria	DOWN
ENSOMYG00000002818	-1.31956	0.0185367	pitpnc1b	phosphatidylinositol transfer protein cytoplasmic 1b [Source:ZFIN;Acc:ZDB-GENE-041114-158]	pitpnb	Bilateria	DOWN
ENSOMYG00000003003	1.07946	0.0485598	NA	NA	NA	Salmoninae	UP
ENSOMYG00000003003	1.07946	0.0485598	NA	NA	NA	Vertebrata	UP
ENSOMYG00000003003	1.07946	0.0485598	NA	NA	rab25b	Opisthokonta	UP
ENSOMYG00000003003	1.07946	0.0485598	NA	NA	NA	Opisthokonta	UP
ENSOMYG00000003003	1.07946	0.0485598	NA	NA	rab34a	Opisthokonta	UP
ENSOMYG00000003003	1.07946	0.0485598	NA	NA	RAB34	Opisthokonta	UP
ENSOMYG00000003003	1.07946	0.0485598	NA	NA	rab11ba	Opisthokonta	UP
ENSOMYG00000003003	1.07946	0.0485598	NA	NA	rb11a	Opisthokonta	UP
ENSOMYG00000003003	1.07946	0.0485598	NA	NA	rab32a	Opisthokonta	UP
ENSOMYG00000003003	1.07946	0.0485598	NA	NA	rab32b	Opisthokonta	UP
ENSOMYG00000003003	1.07946	0.0485598	NA	NA	rab3aa	Opisthokonta	UP
ENSOMYG00000003003	1.07946	0.0485598	NA	NA	rab3ab	Opisthokonta	UP
ENSOMYG00000003003	1.07946	0.0485598	NA	NA	rab3c	Opisthokonta	UP
ENSOMYG00000003003	1.07946	0.0485598	NA	NA	RAB3C	Opisthokonta	UP
ENSOMYG00000003003	1.07946	0.0485598	NA	NA	RAB17	Opisthokonta	UP
ENSOMYG00000003003	1.07946	0.0485598	NA	NA	rab13	Opisthokonta	UP
ENSOMYG00000003003	1.07946	0.0485598	NA	NA	rab5aa	Opisthokonta	UP
ENSOMYG00000003003	1.07946	0.0485598	NA	NA	rab5ab	Opisthokonta	UP
ENSOMYG00000003003	1.07946	0.0485598	NA	NA	rab11a	Opisthokonta	UP
ENSOMYG00000003003	1.07946	0.0485598	NA	NA	RAB11A	Opisthokonta	UP
ENSOMYG00000003003	1.07946	0.0485598	NA	NA	RAB38	Opisthokonta	UP
ENSOMYG00000003003	1.07946	0.0485598	NA	NA	rab33a	Opisthokonta	UP
ENSOMYG00000003003	1.07946	0.0485598	NA	NA	rabl2	Opisthokonta	UP
ENSOMYG00000003003	1.07946	0.0485598	NA	NA	rab20	Opisthokonta	UP
ENSOMYG00000003003	1.07946	0.0485598	NA	NA	rab40c	Opisthokonta	UP
ENSOMYG00000003003	1.07946	0.0485598	NA	NA	rab8a	Opisthokonta	UP
ENSOMYG00000003003	1.07946	0.0485598	NA	NA	rab9b	Opisthokonta	UP
ENSOMYG00000003003	1.07946	0.0485598	NA	NA	rab36	Opisthokonta	UP
ENSOMYG00000003003	1.07946	0.0485598	NA	NA	RAB28	Opisthokonta	UP
ENSOMYG00000003003	1.07946	0.0485598	NA	NA	zgc:162171	Opisthokonta	UP
ENSOMYG00000003003	1.07946	0.0485598	NA	NA	rab38c	Opisthokonta	UP
ENSOMYG00000003003	1.07946	0.0485598	NA	NA	RAB5C	Opisthokonta	UP
ENSOMYG00000003003	1.07946	0.0485598	NA	NA	rab5c	Opisthokonta	UP
ENSOMYG00000003003	1.07946	0.0485598	NA	NA	rab11bb	Opisthokonta	UP
ENSOMYG00000003003	1.07946	0.0485598	NA	NA	rab6bb	Opisthokonta	UP
ENSOMYG00000003003	1.07946	0.0485598	NA	NA	rab6ba	Opisthokonta	UP
ENSOMYG00000003003	1.07946	0.0485598	NA	NA	rab3b	Opisthokonta	UP
ENSOMYG00000003003	1.07946	0.0485598	NA	NA	rab11al	Opisthokonta	UP
ENSOMYG00000003003	1.07946	0.0485598	NA	NA	dnajc27	Opisthokonta	UP
ENSOMYG00000003003	1.07946	0.0485598	NA	NA	rab12	Opisthokonta	UP
ENSOMYG00000003003	1.07946	0.0485598	NA	NA	rab30	Opisthokonta	UP
ENSOMYG00000003003	1.07946	0.0485598	NA	NA	rab18a	Opisthokonta	UP
ENSOMYG00000003003	1.07946	0.0485598	NA	NA	rab5b	Opisthokonta	UP
ENSOMYG00000003003	1.07946	0.0485598	NA	NA	si:dkey-16l2.16	Opisthokonta	UP
ENSOMYG00000003003	1.07946	0.0485598	NA	NA	rab43	Opisthokonta	UP
ENSOMYG00000003003	1.07946	0.0485598	NA	NA	RAB9A	Opisthokonta	UP
ENSOMYG00000003003	1.07946	0.0485598	NA	NA	RAB27A	Opisthokonta	UP
ENSOMYG00000003003	1.07946	0.0485598	NA	NA	rab3db	Opisthokonta	UP
ENSOMYG00000003003	1.07946	0.0485598	NA	NA	rab22a	Opisthokonta	UP
ENSOMYG00000003003	1.07946	0.0485598	NA	NA	rab4b	Opisthokonta	UP
ENSOMYG00000003003	1.07946	0.0485598	NA	NA	rab42a	Opisthokonta	UP
ENSOMYG00000003003	1.07946	0.0485598	NA	NA	RAB27B	Opisthokonta	UP
ENSOMYG00000003003	1.07946	0.0485598	NA	NA	rab33ba	Opisthokonta	UP
ENSOMYG00000003003	1.07946	0.0485598	NA	NA	rab23	Opisthokonta	UP
ENSOMYG00000003003	1.07946	0.0485598	NA	NA	rab40b	Opisthokonta	UP
ENSOMYG00000003003	1.07946	0.0485598	NA	NA	RAB31	Opisthokonta	UP
ENSOMYG00000003003	1.07946	0.0485598	NA	NA	RAB24	Opisthokonta	UP
ENSOMYG00000003003	1.07946	0.0485598	NA	NA	rab24	Opisthokonta	UP
ENSOMYG00000003003	1.07946	0.0485598	NA	NA	rab2a	Opisthokonta	UP
ENSOMYG00000003003	1.07946	0.0485598	NA	NA	rab41	Opisthokonta	UP
ENSOMYG00000003003	1.07946	0.0485598	NA	NA	rab6a	Opisthokonta	UP
ENSOMYG00000003003	1.07946	0.0485598	NA	NA	rab35b	Opisthokonta	UP
ENSOMYG00000003003	1.07946	0.0485598	NA	NA	rab15	Opisthokonta	UP
ENSOMYG00000003003	1.07946	0.0485598	NA	NA	rab7b	Opisthokonta	UP
ENSOMYG00000003003	1.07946	0.0485598	NA	NA	RAB7A	Opisthokonta	UP
ENSOMYG00000003003	1.07946	0.0485598	NA	NA	rab7a	Opisthokonta	UP
ENSOMYG00000003003	1.07946	0.0485598	NA	NA	rab4a	Opisthokonta	UP
ENSOMYG00000003003	1.07946	0.0485598	NA	NA	rasef2	Opisthokonta	UP
ENSOMYG00000003084	1.50994	0.0115895	ATP11A	ATPase phospholipid transporting 11A [Source:HGNC Symbol;Acc:HGNC:13552]	NA	Opisthokonta	UP
ENSOMYG00000003084	1.50994	0.0115895	ATP11A	ATPase phospholipid transporting 11A [Source:HGNC Symbol;Acc:HGNC:13552]	ATP8A1	Opisthokonta	UP
ENSOMYG00000003084	1.50994	0.0115895	ATP11A	ATPase phospholipid transporting 11A [Source:HGNC Symbol;Acc:HGNC:13552]	atp10a	Opisthokonta	UP
ENSOMYG00000003084	1.50994	0.0115895	ATP11A	ATPase phospholipid transporting 11A [Source:HGNC Symbol;Acc:HGNC:13552]	ATP11C	Opisthokonta	UP
ENSOMYG00000003084	1.50994	0.0115895	ATP11A	ATPase phospholipid transporting 11A [Source:HGNC Symbol;Acc:HGNC:13552]	atp10d	Opisthokonta	UP
ENSOMYG00000003084	1.50994	0.0115895	ATP11A	ATPase phospholipid transporting 11A [Source:HGNC Symbol;Acc:HGNC:13552]	ATP10D	Opisthokonta	UP
ENSOMYG00000003084	1.50994	0.0115895	ATP11A	ATPase phospholipid transporting 11A [Source:HGNC Symbol;Acc:HGNC:13552]	atp8b5b	Opisthokonta	UP
ENSOMYG00000003084	1.50994	0.0115895	ATP11A	ATPase phospholipid transporting 11A [Source:HGNC Symbol;Acc:HGNC:13552]	atp8a2	Opisthokonta	UP
ENSOMYG00000003084	1.50994	0.0115895	ATP11A	ATPase phospholipid transporting 11A [Source:HGNC Symbol;Acc:HGNC:13552]	ATP9A	Opisthokonta	UP
ENSOMYG00000003084	1.50994	0.0115895	ATP11A	ATPase phospholipid transporting 11A [Source:HGNC Symbol;Acc:HGNC:13552]	atp8b5a	Opisthokonta	UP
ENSOMYG00000003084	1.50994	0.0115895	ATP11A	ATPase phospholipid transporting 11A [Source:HGNC Symbol;Acc:HGNC:13552]	atp9b	Opisthokonta	UP
ENSOMYG00000003084	1.50994	0.0115895	ATP11A	ATPase phospholipid transporting 11A [Source:HGNC Symbol;Acc:HGNC:13552]	atp8b3	Opisthokonta	UP
ENSOMYG00000003084	1.50994	0.0115895	ATP11A	ATPase phospholipid transporting 11A [Source:HGNC Symbol;Acc:HGNC:13552]	ATP11A	Salmoninae	UP
ENSOMYG00000003084	1.50994	0.0115895	ATP11A	ATPase phospholipid transporting 11A [Source:HGNC Symbol;Acc:HGNC:13552]	atp11a	Clupeocephala	UP
ENSOMYG00000003163	-1.61252	0.0429026	orc6	origin recognition complex, subunit 6 [Source:ZFIN;Acc:ZDB-GENE-030131-2976]	orc6	Salmoninae	DOWN
ENSOMYG00000003171	1.90152	0.0169425	NA	NA	NA	Opisthokonta	UP
ENSOMYG00000003171	1.90152	0.0169425	NA	NA	HSD17B1	Opisthokonta	UP
ENSOMYG00000003171	1.90152	0.0169425	NA	NA	rdh1	Opisthokonta	UP
ENSOMYG00000003171	1.90152	0.0169425	NA	NA	dhrs9	Opisthokonta	UP
ENSOMYG00000003171	1.90152	0.0169425	NA	NA	DHRS9	Opisthokonta	UP
ENSOMYG00000003171	1.90152	0.0169425	NA	NA	rdh3	Opisthokonta	UP
ENSOMYG00000003171	1.90152	0.0169425	NA	NA	rdh20	Opisthokonta	UP
ENSOMYG00000003171	1.90152	0.0169425	NA	NA	hsd17b2	Opisthokonta	UP
ENSOMYG00000003171	1.90152	0.0169425	NA	NA	hsd11b2	Opisthokonta	UP
ENSOMYG00000003171	1.90152	0.0169425	NA	NA	sdr16c5a	Opisthokonta	UP
ENSOMYG00000003171	1.90152	0.0169425	NA	NA	sdr16c5b	Opisthokonta	UP
ENSOMYG00000003171	1.90152	0.0169425	NA	NA	si:dkey-221h15.4	Opisthokonta	UP
ENSOMYG00000003171	1.90152	0.0169425	NA	NA	zgc:113142	Opisthokonta	UP
ENSOMYG00000003171	1.90152	0.0169425	NA	NA	hsd17b12a	Opisthokonta	UP
ENSOMYG00000003171	1.90152	0.0169425	NA	NA	hsd17b12b	Opisthokonta	UP
ENSOMYG00000003171	1.90152	0.0169425	NA	NA	RDH5	Opisthokonta	UP
ENSOMYG00000003171	1.90152	0.0169425	NA	NA	dhrs12la	Opisthokonta	UP
ENSOMYG00000003171	1.90152	0.0169425	NA	NA	hsd17b14	Opisthokonta	UP
ENSOMYG00000003171	1.90152	0.0169425	NA	NA	hsd17b8	Opisthokonta	UP
ENSOMYG00000003171	1.90152	0.0169425	NA	NA	dhrs3b	Opisthokonta	UP
ENSOMYG00000003171	1.90152	0.0169425	NA	NA	dhrs3a	Opisthokonta	UP
ENSOMYG00000003171	1.90152	0.0169425	NA	NA	si:dkey-73n8.3	Opisthokonta	UP
ENSOMYG00000003171	1.90152	0.0169425	NA	NA	si:dkey-94e7.2	Opisthokonta	UP
ENSOMYG00000003171	1.90152	0.0169425	NA	NA	hsdl1	Opisthokonta	UP
ENSOMYG00000003171	1.90152	0.0169425	NA	NA	rdh12	Opisthokonta	UP
ENSOMYG00000003171	1.90152	0.0169425	NA	NA	bdh1	Opisthokonta	UP
ENSOMYG00000003171	1.90152	0.0169425	NA	NA	rdh10b	Opisthokonta	UP
ENSOMYG00000003171	1.90152	0.0169425	NA	NA	rdh10a	Opisthokonta	UP
ENSOMYG00000003171	1.90152	0.0169425	NA	NA	hsd17b3	Salmoninae	UP
ENSOMYG00000003398	-1.39851	0.0147664	psat1	phosphoserine aminotransferase 1 [Source:ZFIN;Acc:ZDB-GENE-030131-5723]	agxtb	Opisthokonta	DOWN
ENSOMYG00000003398	-1.39851	0.0147664	psat1	phosphoserine aminotransferase 1 [Source:ZFIN;Acc:ZDB-GENE-030131-5723]	agxta	Opisthokonta	DOWN
ENSOMYG00000003495	-1.17746	0.042179	NA	NA	NA	Salmoninae	DOWN
ENSOMYG00000003495	-1.17746	0.042179	NA	NA	NA	Clupeocephala	DOWN
ENSOMYG00000003495	-1.17746	0.042179	NA	NA	NA	Gnathostomata	DOWN
ENSOMYG00000003507	1.05784	0.034952	SRP72	signal recognition particle 72 [Source:HGNC Symbol;Acc:HGNC:11303]	SRP72	Salmoninae	UP
ENSOMYG00000003603	1.08087	0.0220596	THNSL1	threonine synthase like 1 [Source:HGNC Symbol;Acc:HGNC:26160]	thnsl2	Opisthokonta	UP
ENSOMYG00000003603	1.08087	0.0220596	THNSL1	threonine synthase like 1 [Source:HGNC Symbol;Acc:HGNC:26160]	NA	Opisthokonta	UP
ENSOMYG00000003603	1.08087	0.0220596	THNSL1	threonine synthase like 1 [Source:HGNC Symbol;Acc:HGNC:26160]	sdsl	Opisthokonta	UP
ENSOMYG00000003603	1.08087	0.0220596	THNSL1	threonine synthase like 1 [Source:HGNC Symbol;Acc:HGNC:26160]	cbs	Opisthokonta	UP
ENSOMYG00000003628	1.92154	0.0031868	NA	zinc finger, FYVE domain containing 9b [Source:ZFIN;Acc:ZDB-GENE-110825-2]	NA	Salmoninae	UP
ENSOMYG00000003628	1.92154	0.0031868	NA	zinc finger, FYVE domain containing 9b [Source:ZFIN;Acc:ZDB-GENE-110825-2]	NA	Clupeocephala	UP
ENSOMYG00000003628	1.92154	0.0031868	NA	zinc finger, FYVE domain containing 9b [Source:ZFIN;Acc:ZDB-GENE-110825-2]	ZFYVE9	Clupeocephala	UP
ENSOMYG00000003628	1.92154	0.0031868	NA	zinc finger, FYVE domain containing 9b [Source:ZFIN;Acc:ZDB-GENE-110825-2]	NA	Vertebrata	UP
ENSOMYG00000003693	-1.43019	0.000498152	NA	NA	NA	Gnathostomata	DOWN
ENSOMYG00000003693	-1.43019	0.000498152	NA	NA	NA	Bilateria	DOWN
ENSOMYG00000003693	-1.43019	0.000498152	NA	NA	trim101	Bilateria	DOWN
ENSOMYG00000003693	-1.43019	0.000498152	NA	NA	TRIM13	Bilateria	DOWN
ENSOMYG00000003693	-1.43019	0.000498152	NA	NA	trim13	Bilateria	DOWN
ENSOMYG00000003693	-1.43019	0.000498152	NA	NA	trim55a	Bilateria	DOWN
ENSOMYG00000003693	-1.43019	0.000498152	NA	NA	trim54	Bilateria	DOWN
ENSOMYG00000003693	-1.43019	0.000498152	NA	NA	trim55b	Bilateria	DOWN
ENSOMYG00000003693	-1.43019	0.000498152	NA	NA	trim36	Bilateria	DOWN
ENSOMYG00000003693	-1.43019	0.000498152	NA	NA	trim66	Bilateria	DOWN
ENSOMYG00000003693	-1.43019	0.000498152	NA	NA	trim46a	Bilateria	DOWN
ENSOMYG00000003693	-1.43019	0.000498152	NA	NA	trim46b	Bilateria	DOWN
ENSOMYG00000003693	-1.43019	0.000498152	NA	NA	trim71	Bilateria	DOWN
ENSOMYG00000003693	-1.43019	0.000498152	NA	NA	btr02	Bilateria	DOWN
ENSOMYG00000003693	-1.43019	0.000498152	NA	NA	trim44	Bilateria	DOWN
ENSOMYG00000003693	-1.43019	0.000498152	NA	NA	TRIM32	Bilateria	DOWN
ENSOMYG00000003693	-1.43019	0.000498152	NA	NA	si:ch73-54f23.4	Bilateria	DOWN
ENSOMYG00000003693	-1.43019	0.000498152	NA	NA	zgc:194990	Bilateria	DOWN
ENSOMYG00000003693	-1.43019	0.000498152	NA	NA	si:dkey-219e21.2	Bilateria	DOWN
ENSOMYG00000003693	-1.43019	0.000498152	NA	NA	trim37	Bilateria	DOWN
ENSOMYG00000003693	-1.43019	0.000498152	NA	NA	trim2a	Bilateria	DOWN
ENSOMYG00000003693	-1.43019	0.000498152	NA	NA	trim2b	Bilateria	DOWN
ENSOMYG00000003693	-1.43019	0.000498152	NA	NA	TRIM8	Bilateria	DOWN
ENSOMYG00000003693	-1.43019	0.000498152	NA	NA	ftr83	Bilateria	DOWN
ENSOMYG00000003693	-1.43019	0.000498152	NA	NA	ftr82	Bilateria	DOWN
ENSOMYG00000003693	-1.43019	0.000498152	NA	NA	trim59	Bilateria	DOWN
ENSOMYG00000003693	-1.43019	0.000498152	NA	NA	btr12	Bilateria	DOWN
ENSOMYG00000003693	-1.43019	0.000498152	NA	NA	trim3a	Bilateria	DOWN
ENSOMYG00000003693	-1.43019	0.000498152	NA	NA	trim3b	Bilateria	DOWN
ENSOMYG00000003693	-1.43019	0.000498152	NA	NA	trim16	Bilateria	DOWN
ENSOMYG00000003693	-1.43019	0.000498152	NA	NA	trim47	Bilateria	DOWN
ENSOMYG00000003693	-1.43019	0.000498152	NA	NA	si:dkey-183c6.9	Bilateria	DOWN
ENSOMYG00000003693	-1.43019	0.000498152	NA	NA	TRIM67	Bilateria	DOWN
ENSOMYG00000003693	-1.43019	0.000498152	NA	NA	trim9	Bilateria	DOWN
ENSOMYG00000003693	-1.43019	0.000498152	NA	NA	bspry	Bilateria	DOWN
ENSOMYG00000003693	-1.43019	0.000498152	NA	NA	trim107	Bilateria	DOWN
ENSOMYG00000003693	-1.43019	0.000498152	NA	NA	trim33	Bilateria	DOWN
ENSOMYG00000003693	-1.43019	0.000498152	NA	NA	mid1	Bilateria	DOWN
ENSOMYG00000003693	-1.43019	0.000498152	NA	NA	trim69	Bilateria	DOWN
ENSOMYG00000003693	-1.43019	0.000498152	NA	NA	trim105	Bilateria	DOWN
ENSOMYG00000003693	-1.43019	0.000498152	NA	NA	mid2	Bilateria	DOWN
ENSOMYG00000003693	-1.43019	0.000498152	NA	NA	trim25	Bilateria	DOWN
ENSOMYG00000003693	-1.43019	0.000498152	NA	NA	trim63a	Bilateria	DOWN
ENSOMYG00000003693	-1.43019	0.000498152	NA	NA	NA	Salmoninae	DOWN
ENSOMYG00000003693	-1.43019	0.000498152	NA	NA	NA	Euteleosteomorpha	DOWN
ENSOMYG00000003693	-1.43019	0.000498152	NA	NA	NA	Clupeocephala	DOWN
ENSOMYG00000003693	-1.43019	0.000498152	NA	NA	NA	Neopterygii	DOWN
ENSOMYG00000003693	-1.43019	0.000498152	NA	NA	NA	Euteleostomi	DOWN
ENSOMYG00000003733	-2.0462	8.84678e-06	NA	NA	NA	Oncorhynchus mykiss	DOWN
ENSOMYG00000003733	-2.0462	8.84678e-06	NA	NA	NA	Oncorhynchus	DOWN
ENSOMYG00000003733	-2.0462	8.84678e-06	NA	NA	NA	Protacanthopterygii	DOWN
ENSOMYG00000003733	-2.0462	8.84678e-06	NA	NA	aste1b	Vertebrata	DOWN
ENSOMYG00000003741	5.57422	5.48488e-07	NA	NA	MPV17L	Osteoglossocephalai	UP
ENSOMYG00000003741	5.57422	5.48488e-07	NA	NA	NA	Opisthokonta	UP
ENSOMYG00000003741	5.57422	5.48488e-07	NA	NA	mpv17l2	Opisthokonta	UP
ENSOMYG00000003741	5.57422	5.48488e-07	NA	NA	mpv17	Opisthokonta	UP
ENSOMYG00000003741	5.57422	5.48488e-07	NA	NA	si:ch211-120k19.1	Opisthokonta	UP
ENSOMYG00000003774	1.17991	3.95627e-09	NA	NA	kcna4	Bilateria	UP
ENSOMYG00000003774	1.17991	3.95627e-09	NA	NA	NA	Bilateria	UP
ENSOMYG00000003774	1.17991	3.95627e-09	NA	NA	KCNA3	Bilateria	UP
ENSOMYG00000003774	1.17991	3.95627e-09	NA	NA	kcna2a	Bilateria	UP
ENSOMYG00000003774	1.17991	3.95627e-09	NA	NA	kcng2	Bilateria	UP
ENSOMYG00000003774	1.17991	3.95627e-09	NA	NA	KCND3	Bilateria	UP
ENSOMYG00000003774	1.17991	3.95627e-09	NA	NA	kcnd3	Bilateria	UP
ENSOMYG00000003774	1.17991	3.95627e-09	NA	NA	si:rp71-39b20.4	Bilateria	UP
ENSOMYG00000003774	1.17991	3.95627e-09	NA	NA	kcnb1	Bilateria	UP
ENSOMYG00000003774	1.17991	3.95627e-09	NA	NA	kcnq3	Bilateria	UP
ENSOMYG00000003774	1.17991	3.95627e-09	NA	NA	kcnc2	Bilateria	UP
ENSOMYG00000003774	1.17991	3.95627e-09	NA	NA	kcnq5b	Bilateria	UP
ENSOMYG00000003774	1.17991	3.95627e-09	NA	NA	kcng1	Bilateria	UP
ENSOMYG00000003774	1.17991	3.95627e-09	NA	NA	kcnc1a	Bilateria	UP
ENSOMYG00000003774	1.17991	3.95627e-09	NA	NA	KCNC1	Bilateria	UP
ENSOMYG00000003774	1.17991	3.95627e-09	NA	NA	kcng4a	Bilateria	UP
ENSOMYG00000003774	1.17991	3.95627e-09	NA	NA	KCNS1	Bilateria	UP
ENSOMYG00000003774	1.17991	3.95627e-09	NA	NA	KCNS2	Bilateria	UP
ENSOMYG00000003774	1.17991	3.95627e-09	NA	NA	KCNF1	Bilateria	UP
ENSOMYG00000003774	1.17991	3.95627e-09	NA	NA	KCNA10	Bilateria	UP
ENSOMYG00000003774	1.17991	3.95627e-09	NA	NA	kcnb2a	Bilateria	UP
ENSOMYG00000003774	1.17991	3.95627e-09	NA	NA	KCNB2	Bilateria	UP
ENSOMYG00000003774	1.17991	3.95627e-09	NA	NA	kcnv2a	Bilateria	UP
ENSOMYG00000003774	1.17991	3.95627e-09	NA	NA	kcnv2b	Bilateria	UP
ENSOMYG00000003774	1.17991	3.95627e-09	NA	NA	kcns3a	Bilateria	UP
ENSOMYG00000003774	1.17991	3.95627e-09	NA	NA	kcnd1	Bilateria	UP
ENSOMYG00000003774	1.17991	3.95627e-09	NA	NA	kcnd2	Bilateria	UP
ENSOMYG00000003774	1.17991	3.95627e-09	NA	NA	KCNG3	Bilateria	UP
ENSOMYG00000003774	1.17991	3.95627e-09	NA	NA	kcng3	Bilateria	UP
ENSOMYG00000003774	1.17991	3.95627e-09	NA	NA	kcna1a	Bilateria	UP
ENSOMYG00000003774	1.17991	3.95627e-09	NA	NA	kcna7	Bilateria	UP
ENSOMYG00000003774	1.17991	3.95627e-09	NA	NA	NA	Osteoglossocephalai	UP
ENSOMYG00000004125	9.12082	0.00293741	NA	NA	NA	Opisthokonta	UP
ENSOMYG00000004125	9.12082	0.00293741	NA	NA	hspa4l	Opisthokonta	UP
ENSOMYG00000004125	9.12082	0.00293741	NA	NA	hspa14	Opisthokonta	UP
ENSOMYG00000004125	9.12082	0.00293741	NA	NA	hyou1	Opisthokonta	UP
ENSOMYG00000004125	9.12082	0.00293741	NA	NA	hspa4a	Opisthokonta	UP
ENSOMYG00000004125	9.12082	0.00293741	NA	NA	hspa4b	Opisthokonta	UP
ENSOMYG00000004125	9.12082	0.00293741	NA	NA	hsc70	Opisthokonta	UP
ENSOMYG00000004125	9.12082	0.00293741	NA	NA	HSPA8	Opisthokonta	UP
ENSOMYG00000004125	9.12082	0.00293741	NA	NA	hspa8	Opisthokonta	UP
ENSOMYG00000004125	9.12082	0.00293741	NA	NA	hspa13	Opisthokonta	UP
ENSOMYG00000004125	9.12082	0.00293741	NA	NA	hsp70a	Salmoninae	UP
ENSOMYG00000004125	9.12082	0.00293741	NA	NA	NA	Salmoninae	UP
ENSOMYG00000004125	9.12082	0.00293741	NA	NA	hsp70b	Salmoninae	UP
ENSOMYG00000004125	9.12082	0.00293741	NA	NA	NA	Osteoglossocephalai	UP
ENSOMYG00000004125	9.12082	0.00293741	NA	NA	hspa1b	Actinopterygii	UP
ENSOMYG00000004181	-1.37358	0.0453034	NA	NA	ckap5	Osteoglossocephalai	DOWN
ENSOMYG00000004181	-1.37358	0.0453034	NA	NA	NA	Osteoglossocephalai	DOWN
ENSOMYG00000004208	1.03598	0.0488446	rab11al	RAB11a, member RAS oncogene family, like [Source:ZFIN;Acc:ZDB-GENE-031118-188]	rab25b	Opisthokonta	UP
ENSOMYG00000004208	1.03598	0.0488446	rab11al	RAB11a, member RAS oncogene family, like [Source:ZFIN;Acc:ZDB-GENE-031118-188]	NA	Opisthokonta	UP
ENSOMYG00000004208	1.03598	0.0488446	rab11al	RAB11a, member RAS oncogene family, like [Source:ZFIN;Acc:ZDB-GENE-031118-188]	rab34a	Opisthokonta	UP
ENSOMYG00000004208	1.03598	0.0488446	rab11al	RAB11a, member RAS oncogene family, like [Source:ZFIN;Acc:ZDB-GENE-031118-188]	RAB34	Opisthokonta	UP
ENSOMYG00000004208	1.03598	0.0488446	rab11al	RAB11a, member RAS oncogene family, like [Source:ZFIN;Acc:ZDB-GENE-031118-188]	rab11ba	Opisthokonta	UP
ENSOMYG00000004208	1.03598	0.0488446	rab11al	RAB11a, member RAS oncogene family, like [Source:ZFIN;Acc:ZDB-GENE-031118-188]	rb11a	Opisthokonta	UP
ENSOMYG00000004208	1.03598	0.0488446	rab11al	RAB11a, member RAS oncogene family, like [Source:ZFIN;Acc:ZDB-GENE-031118-188]	rab32a	Opisthokonta	UP
ENSOMYG00000004208	1.03598	0.0488446	rab11al	RAB11a, member RAS oncogene family, like [Source:ZFIN;Acc:ZDB-GENE-031118-188]	rab32b	Opisthokonta	UP
ENSOMYG00000004208	1.03598	0.0488446	rab11al	RAB11a, member RAS oncogene family, like [Source:ZFIN;Acc:ZDB-GENE-031118-188]	rab3aa	Opisthokonta	UP
ENSOMYG00000004208	1.03598	0.0488446	rab11al	RAB11a, member RAS oncogene family, like [Source:ZFIN;Acc:ZDB-GENE-031118-188]	rab3ab	Opisthokonta	UP
ENSOMYG00000004208	1.03598	0.0488446	rab11al	RAB11a, member RAS oncogene family, like [Source:ZFIN;Acc:ZDB-GENE-031118-188]	rab3c	Opisthokonta	UP
ENSOMYG00000004208	1.03598	0.0488446	rab11al	RAB11a, member RAS oncogene family, like [Source:ZFIN;Acc:ZDB-GENE-031118-188]	RAB3C	Opisthokonta	UP
ENSOMYG00000004208	1.03598	0.0488446	rab11al	RAB11a, member RAS oncogene family, like [Source:ZFIN;Acc:ZDB-GENE-031118-188]	RAB17	Opisthokonta	UP
ENSOMYG00000004208	1.03598	0.0488446	rab11al	RAB11a, member RAS oncogene family, like [Source:ZFIN;Acc:ZDB-GENE-031118-188]	rab13	Opisthokonta	UP
ENSOMYG00000004208	1.03598	0.0488446	rab11al	RAB11a, member RAS oncogene family, like [Source:ZFIN;Acc:ZDB-GENE-031118-188]	rab5aa	Opisthokonta	UP
ENSOMYG00000004208	1.03598	0.0488446	rab11al	RAB11a, member RAS oncogene family, like [Source:ZFIN;Acc:ZDB-GENE-031118-188]	rab5ab	Opisthokonta	UP
ENSOMYG00000004208	1.03598	0.0488446	rab11al	RAB11a, member RAS oncogene family, like [Source:ZFIN;Acc:ZDB-GENE-031118-188]	rab11a	Opisthokonta	UP
ENSOMYG00000004208	1.03598	0.0488446	rab11al	RAB11a, member RAS oncogene family, like [Source:ZFIN;Acc:ZDB-GENE-031118-188]	RAB11A	Opisthokonta	UP
ENSOMYG00000004208	1.03598	0.0488446	rab11al	RAB11a, member RAS oncogene family, like [Source:ZFIN;Acc:ZDB-GENE-031118-188]	RAB38	Opisthokonta	UP
ENSOMYG00000004208	1.03598	0.0488446	rab11al	RAB11a, member RAS oncogene family, like [Source:ZFIN;Acc:ZDB-GENE-031118-188]	rab33a	Opisthokonta	UP
ENSOMYG00000004208	1.03598	0.0488446	rab11al	RAB11a, member RAS oncogene family, like [Source:ZFIN;Acc:ZDB-GENE-031118-188]	rabl2	Opisthokonta	UP
ENSOMYG00000004208	1.03598	0.0488446	rab11al	RAB11a, member RAS oncogene family, like [Source:ZFIN;Acc:ZDB-GENE-031118-188]	rab20	Opisthokonta	UP
ENSOMYG00000004208	1.03598	0.0488446	rab11al	RAB11a, member RAS oncogene family, like [Source:ZFIN;Acc:ZDB-GENE-031118-188]	rab40c	Opisthokonta	UP
ENSOMYG00000004208	1.03598	0.0488446	rab11al	RAB11a, member RAS oncogene family, like [Source:ZFIN;Acc:ZDB-GENE-031118-188]	rab8a	Opisthokonta	UP
ENSOMYG00000004208	1.03598	0.0488446	rab11al	RAB11a, member RAS oncogene family, like [Source:ZFIN;Acc:ZDB-GENE-031118-188]	rab9b	Opisthokonta	UP
ENSOMYG00000004208	1.03598	0.0488446	rab11al	RAB11a, member RAS oncogene family, like [Source:ZFIN;Acc:ZDB-GENE-031118-188]	rab36	Opisthokonta	UP
ENSOMYG00000004208	1.03598	0.0488446	rab11al	RAB11a, member RAS oncogene family, like [Source:ZFIN;Acc:ZDB-GENE-031118-188]	RAB28	Opisthokonta	UP
ENSOMYG00000004208	1.03598	0.0488446	rab11al	RAB11a, member RAS oncogene family, like [Source:ZFIN;Acc:ZDB-GENE-031118-188]	zgc:162171	Opisthokonta	UP
ENSOMYG00000004208	1.03598	0.0488446	rab11al	RAB11a, member RAS oncogene family, like [Source:ZFIN;Acc:ZDB-GENE-031118-188]	rab38c	Opisthokonta	UP
ENSOMYG00000004208	1.03598	0.0488446	rab11al	RAB11a, member RAS oncogene family, like [Source:ZFIN;Acc:ZDB-GENE-031118-188]	RAB5C	Opisthokonta	UP
ENSOMYG00000004208	1.03598	0.0488446	rab11al	RAB11a, member RAS oncogene family, like [Source:ZFIN;Acc:ZDB-GENE-031118-188]	rab5c	Opisthokonta	UP
ENSOMYG00000004208	1.03598	0.0488446	rab11al	RAB11a, member RAS oncogene family, like [Source:ZFIN;Acc:ZDB-GENE-031118-188]	rab11bb	Opisthokonta	UP
ENSOMYG00000004208	1.03598	0.0488446	rab11al	RAB11a, member RAS oncogene family, like [Source:ZFIN;Acc:ZDB-GENE-031118-188]	rab6bb	Opisthokonta	UP
ENSOMYG00000004208	1.03598	0.0488446	rab11al	RAB11a, member RAS oncogene family, like [Source:ZFIN;Acc:ZDB-GENE-031118-188]	rab6ba	Opisthokonta	UP
ENSOMYG00000004208	1.03598	0.0488446	rab11al	RAB11a, member RAS oncogene family, like [Source:ZFIN;Acc:ZDB-GENE-031118-188]	rab3b	Opisthokonta	UP
ENSOMYG00000004208	1.03598	0.0488446	rab11al	RAB11a, member RAS oncogene family, like [Source:ZFIN;Acc:ZDB-GENE-031118-188]	dnajc27	Opisthokonta	UP
ENSOMYG00000004208	1.03598	0.0488446	rab11al	RAB11a, member RAS oncogene family, like [Source:ZFIN;Acc:ZDB-GENE-031118-188]	rab12	Opisthokonta	UP
ENSOMYG00000004208	1.03598	0.0488446	rab11al	RAB11a, member RAS oncogene family, like [Source:ZFIN;Acc:ZDB-GENE-031118-188]	rab30	Opisthokonta	UP
ENSOMYG00000004208	1.03598	0.0488446	rab11al	RAB11a, member RAS oncogene family, like [Source:ZFIN;Acc:ZDB-GENE-031118-188]	rab18a	Opisthokonta	UP
ENSOMYG00000004208	1.03598	0.0488446	rab11al	RAB11a, member RAS oncogene family, like [Source:ZFIN;Acc:ZDB-GENE-031118-188]	rab5b	Opisthokonta	UP
ENSOMYG00000004208	1.03598	0.0488446	rab11al	RAB11a, member RAS oncogene family, like [Source:ZFIN;Acc:ZDB-GENE-031118-188]	si:dkey-16l2.16	Opisthokonta	UP
ENSOMYG00000004208	1.03598	0.0488446	rab11al	RAB11a, member RAS oncogene family, like [Source:ZFIN;Acc:ZDB-GENE-031118-188]	rab43	Opisthokonta	UP
ENSOMYG00000004208	1.03598	0.0488446	rab11al	RAB11a, member RAS oncogene family, like [Source:ZFIN;Acc:ZDB-GENE-031118-188]	RAB9A	Opisthokonta	UP
ENSOMYG00000004208	1.03598	0.0488446	rab11al	RAB11a, member RAS oncogene family, like [Source:ZFIN;Acc:ZDB-GENE-031118-188]	RAB27A	Opisthokonta	UP
ENSOMYG00000004208	1.03598	0.0488446	rab11al	RAB11a, member RAS oncogene family, like [Source:ZFIN;Acc:ZDB-GENE-031118-188]	rab3db	Opisthokonta	UP
ENSOMYG00000004208	1.03598	0.0488446	rab11al	RAB11a, member RAS oncogene family, like [Source:ZFIN;Acc:ZDB-GENE-031118-188]	rab22a	Opisthokonta	UP
ENSOMYG00000004208	1.03598	0.0488446	rab11al	RAB11a, member RAS oncogene family, like [Source:ZFIN;Acc:ZDB-GENE-031118-188]	rab4b	Opisthokonta	UP
ENSOMYG00000004208	1.03598	0.0488446	rab11al	RAB11a, member RAS oncogene family, like [Source:ZFIN;Acc:ZDB-GENE-031118-188]	rab42a	Opisthokonta	UP
ENSOMYG00000004208	1.03598	0.0488446	rab11al	RAB11a, member RAS oncogene family, like [Source:ZFIN;Acc:ZDB-GENE-031118-188]	RAB27B	Opisthokonta	UP
ENSOMYG00000004208	1.03598	0.0488446	rab11al	RAB11a, member RAS oncogene family, like [Source:ZFIN;Acc:ZDB-GENE-031118-188]	rab33ba	Opisthokonta	UP
ENSOMYG00000004208	1.03598	0.0488446	rab11al	RAB11a, member RAS oncogene family, like [Source:ZFIN;Acc:ZDB-GENE-031118-188]	rab23	Opisthokonta	UP
ENSOMYG00000004208	1.03598	0.0488446	rab11al	RAB11a, member RAS oncogene family, like [Source:ZFIN;Acc:ZDB-GENE-031118-188]	rab40b	Opisthokonta	UP
ENSOMYG00000004208	1.03598	0.0488446	rab11al	RAB11a, member RAS oncogene family, like [Source:ZFIN;Acc:ZDB-GENE-031118-188]	RAB31	Opisthokonta	UP
ENSOMYG00000004208	1.03598	0.0488446	rab11al	RAB11a, member RAS oncogene family, like [Source:ZFIN;Acc:ZDB-GENE-031118-188]	RAB24	Opisthokonta	UP
ENSOMYG00000004208	1.03598	0.0488446	rab11al	RAB11a, member RAS oncogene family, like [Source:ZFIN;Acc:ZDB-GENE-031118-188]	rab24	Opisthokonta	UP
ENSOMYG00000004208	1.03598	0.0488446	rab11al	RAB11a, member RAS oncogene family, like [Source:ZFIN;Acc:ZDB-GENE-031118-188]	rab2a	Opisthokonta	UP
ENSOMYG00000004208	1.03598	0.0488446	rab11al	RAB11a, member RAS oncogene family, like [Source:ZFIN;Acc:ZDB-GENE-031118-188]	rab41	Opisthokonta	UP
ENSOMYG00000004208	1.03598	0.0488446	rab11al	RAB11a, member RAS oncogene family, like [Source:ZFIN;Acc:ZDB-GENE-031118-188]	rab6a	Opisthokonta	UP
ENSOMYG00000004208	1.03598	0.0488446	rab11al	RAB11a, member RAS oncogene family, like [Source:ZFIN;Acc:ZDB-GENE-031118-188]	rab35b	Opisthokonta	UP
ENSOMYG00000004208	1.03598	0.0488446	rab11al	RAB11a, member RAS oncogene family, like [Source:ZFIN;Acc:ZDB-GENE-031118-188]	rab15	Opisthokonta	UP
ENSOMYG00000004208	1.03598	0.0488446	rab11al	RAB11a, member RAS oncogene family, like [Source:ZFIN;Acc:ZDB-GENE-031118-188]	rab7b	Opisthokonta	UP
ENSOMYG00000004208	1.03598	0.0488446	rab11al	RAB11a, member RAS oncogene family, like [Source:ZFIN;Acc:ZDB-GENE-031118-188]	RAB7A	Opisthokonta	UP
ENSOMYG00000004208	1.03598	0.0488446	rab11al	RAB11a, member RAS oncogene family, like [Source:ZFIN;Acc:ZDB-GENE-031118-188]	rab7a	Opisthokonta	UP
ENSOMYG00000004208	1.03598	0.0488446	rab11al	RAB11a, member RAS oncogene family, like [Source:ZFIN;Acc:ZDB-GENE-031118-188]	rab4a	Opisthokonta	UP
ENSOMYG00000004208	1.03598	0.0488446	rab11al	RAB11a, member RAS oncogene family, like [Source:ZFIN;Acc:ZDB-GENE-031118-188]	rasef2	Opisthokonta	UP
ENSOMYG00000004208	1.03598	0.0488446	rab11al	RAB11a, member RAS oncogene family, like [Source:ZFIN;Acc:ZDB-GENE-031118-188]	rab11al	Salmoninae	UP
ENSOMYG00000004264	3.48473	1.18464e-08	NA	NA	lctlb	Bilateria	UP
ENSOMYG00000004264	3.48473	1.18464e-08	NA	NA	lctla	Bilateria	UP
ENSOMYG00000004264	3.48473	1.18464e-08	NA	NA	gba3	Bilateria	UP
ENSOMYG00000004264	3.48473	1.18464e-08	NA	NA	NA	Bilateria	UP
ENSOMYG00000004365	1.1031	0.0396986	MCMDC2	minichromosome maintenance domain containing 2 [Source:HGNC Symbol;Acc:HGNC:26368]	mcm5	Opisthokonta	UP
ENSOMYG00000004365	1.1031	0.0396986	MCMDC2	minichromosome maintenance domain containing 2 [Source:HGNC Symbol;Acc:HGNC:26368]	NA	Opisthokonta	UP
ENSOMYG00000004365	1.1031	0.0396986	MCMDC2	minichromosome maintenance domain containing 2 [Source:HGNC Symbol;Acc:HGNC:26368]	mcm2	Opisthokonta	UP
ENSOMYG00000004365	1.1031	0.0396986	MCMDC2	minichromosome maintenance domain containing 2 [Source:HGNC Symbol;Acc:HGNC:26368]	mcm3	Opisthokonta	UP
ENSOMYG00000004365	1.1031	0.0396986	MCMDC2	minichromosome maintenance domain containing 2 [Source:HGNC Symbol;Acc:HGNC:26368]	mcm6l	Opisthokonta	UP
ENSOMYG00000004365	1.1031	0.0396986	MCMDC2	minichromosome maintenance domain containing 2 [Source:HGNC Symbol;Acc:HGNC:26368]	mcm3l	Opisthokonta	UP
ENSOMYG00000004365	1.1031	0.0396986	MCMDC2	minichromosome maintenance domain containing 2 [Source:HGNC Symbol;Acc:HGNC:26368]	mcm9	Chordata	UP
ENSOMYG00000004365	1.1031	0.0396986	MCMDC2	minichromosome maintenance domain containing 2 [Source:HGNC Symbol;Acc:HGNC:26368]	NA	Bilateria	UP
ENSOMYG00000004365	1.1031	0.0396986	MCMDC2	minichromosome maintenance domain containing 2 [Source:HGNC Symbol;Acc:HGNC:26368]	mcm4	Bilateria	UP
ENSOMYG00000004381	-1.30638	0.00867487	dctd	dCMP deaminase [Source:ZFIN;Acc:ZDB-GENE-050417-116]	dctd	Salmoninae	DOWN
ENSOMYG00000004381	-1.30638	0.00867487	dctd	dCMP deaminase [Source:ZFIN;Acc:ZDB-GENE-050417-116]	cdadc1	Bilateria	DOWN
ENSOMYG00000004457	-1.06464	0.0039416	anapc5	anaphase promoting complex subunit 5 [Source:ZFIN;Acc:ZDB-GENE-030131-1574]	NA	Vertebrata	DOWN
ENSOMYG00000004468	2.26729	0.0291207	NA	NA	trib3	Salmoninae	UP
ENSOMYG00000004468	2.26729	0.0291207	NA	NA	NA	Chordata	UP
ENSOMYG00000004468	2.26729	0.0291207	NA	NA	stk40	Chordata	UP
ENSOMYG00000004468	2.26729	0.0291207	NA	NA	trib1	Chordata	UP
ENSOMYG00000004544	-1.24193	0.0438984	si:dkey-24p1.1	si:dkey-24p1.1 [Source:ZFIN;Acc:ZDB-GENE-060503-631]	NA	Bilateria	DOWN
ENSOMYG00000004544	-1.24193	0.0438984	si:dkey-24p1.1	si:dkey-24p1.1 [Source:ZFIN;Acc:ZDB-GENE-060503-631]	SDK2	Bilateria	DOWN
ENSOMYG00000004544	-1.24193	0.0438984	si:dkey-24p1.1	si:dkey-24p1.1 [Source:ZFIN;Acc:ZDB-GENE-060503-631]	igsf9a	Bilateria	DOWN
ENSOMYG00000004544	-1.24193	0.0438984	si:dkey-24p1.1	si:dkey-24p1.1 [Source:ZFIN;Acc:ZDB-GENE-060503-631]	nrcama	Bilateria	DOWN
ENSOMYG00000004544	-1.24193	0.0438984	si:dkey-24p1.1	si:dkey-24p1.1 [Source:ZFIN;Acc:ZDB-GENE-060503-631]	NRCAM	Bilateria	DOWN
ENSOMYG00000004544	-1.24193	0.0438984	si:dkey-24p1.1	si:dkey-24p1.1 [Source:ZFIN;Acc:ZDB-GENE-060503-631]	VSIG10	Bilateria	DOWN
ENSOMYG00000004544	-1.24193	0.0438984	si:dkey-24p1.1	si:dkey-24p1.1 [Source:ZFIN;Acc:ZDB-GENE-060503-631]	cdon	Bilateria	DOWN
ENSOMYG00000004544	-1.24193	0.0438984	si:dkey-24p1.1	si:dkey-24p1.1 [Source:ZFIN;Acc:ZDB-GENE-060503-631]	PRTG	Bilateria	DOWN
ENSOMYG00000004544	-1.24193	0.0438984	si:dkey-24p1.1	si:dkey-24p1.1 [Source:ZFIN;Acc:ZDB-GENE-060503-631]	IGSF10	Bilateria	DOWN
ENSOMYG00000004544	-1.24193	0.0438984	si:dkey-24p1.1	si:dkey-24p1.1 [Source:ZFIN;Acc:ZDB-GENE-060503-631]	cntn5	Bilateria	DOWN
ENSOMYG00000004544	-1.24193	0.0438984	si:dkey-24p1.1	si:dkey-24p1.1 [Source:ZFIN;Acc:ZDB-GENE-060503-631]	robo3	Bilateria	DOWN
ENSOMYG00000004544	-1.24193	0.0438984	si:dkey-24p1.1	si:dkey-24p1.1 [Source:ZFIN;Acc:ZDB-GENE-060503-631]	robo4	Bilateria	DOWN
ENSOMYG00000004544	-1.24193	0.0438984	si:dkey-24p1.1	si:dkey-24p1.1 [Source:ZFIN;Acc:ZDB-GENE-060503-631]	dcc	Bilateria	DOWN
ENSOMYG00000004544	-1.24193	0.0438984	si:dkey-24p1.1	si:dkey-24p1.1 [Source:ZFIN;Acc:ZDB-GENE-060503-631]	IGDCC3	Bilateria	DOWN
ENSOMYG00000004544	-1.24193	0.0438984	si:dkey-24p1.1	si:dkey-24p1.1 [Source:ZFIN;Acc:ZDB-GENE-060503-631]	boc	Bilateria	DOWN
ENSOMYG00000004544	-1.24193	0.0438984	si:dkey-24p1.1	si:dkey-24p1.1 [Source:ZFIN;Acc:ZDB-GENE-060503-631]	cntn1b	Bilateria	DOWN
ENSOMYG00000004544	-1.24193	0.0438984	si:dkey-24p1.1	si:dkey-24p1.1 [Source:ZFIN;Acc:ZDB-GENE-060503-631]	CNTN1	Bilateria	DOWN
ENSOMYG00000004544	-1.24193	0.0438984	si:dkey-24p1.1	si:dkey-24p1.1 [Source:ZFIN;Acc:ZDB-GENE-060503-631]	l1cama	Bilateria	DOWN
ENSOMYG00000004544	-1.24193	0.0438984	si:dkey-24p1.1	si:dkey-24p1.1 [Source:ZFIN;Acc:ZDB-GENE-060503-631]	IGDCC4	Bilateria	DOWN
ENSOMYG00000004544	-1.24193	0.0438984	si:dkey-24p1.1	si:dkey-24p1.1 [Source:ZFIN;Acc:ZDB-GENE-060503-631]	ncam3	Bilateria	DOWN
ENSOMYG00000004544	-1.24193	0.0438984	si:dkey-24p1.1	si:dkey-24p1.1 [Source:ZFIN;Acc:ZDB-GENE-060503-631]	igsf21b	Bilateria	DOWN
ENSOMYG00000004544	-1.24193	0.0438984	si:dkey-24p1.1	si:dkey-24p1.1 [Source:ZFIN;Acc:ZDB-GENE-060503-631]	igsf21a	Bilateria	DOWN
ENSOMYG00000004544	-1.24193	0.0438984	si:dkey-24p1.1	si:dkey-24p1.1 [Source:ZFIN;Acc:ZDB-GENE-060503-631]	ncam1a	Bilateria	DOWN
ENSOMYG00000004544	-1.24193	0.0438984	si:dkey-24p1.1	si:dkey-24p1.1 [Source:ZFIN;Acc:ZDB-GENE-060503-631]	ncam1b	Bilateria	DOWN
ENSOMYG00000004544	-1.24193	0.0438984	si:dkey-24p1.1	si:dkey-24p1.1 [Source:ZFIN;Acc:ZDB-GENE-060503-631]	dscama	Bilateria	DOWN
ENSOMYG00000004544	-1.24193	0.0438984	si:dkey-24p1.1	si:dkey-24p1.1 [Source:ZFIN;Acc:ZDB-GENE-060503-631]	dscamb	Bilateria	DOWN
ENSOMYG00000004544	-1.24193	0.0438984	si:dkey-24p1.1	si:dkey-24p1.1 [Source:ZFIN;Acc:ZDB-GENE-060503-631]	cntn4	Bilateria	DOWN
ENSOMYG00000004544	-1.24193	0.0438984	si:dkey-24p1.1	si:dkey-24p1.1 [Source:ZFIN;Acc:ZDB-GENE-060503-631]	cntn3a.1	Bilateria	DOWN
ENSOMYG00000004544	-1.24193	0.0438984	si:dkey-24p1.1	si:dkey-24p1.1 [Source:ZFIN;Acc:ZDB-GENE-060503-631]	dscaml1	Bilateria	DOWN
ENSOMYG00000004544	-1.24193	0.0438984	si:dkey-24p1.1	si:dkey-24p1.1 [Source:ZFIN;Acc:ZDB-GENE-060503-631]	cntn3b	Bilateria	DOWN
ENSOMYG00000004544	-1.24193	0.0438984	si:dkey-24p1.1	si:dkey-24p1.1 [Source:ZFIN;Acc:ZDB-GENE-060503-631]	IGSF9B	Bilateria	DOWN
ENSOMYG00000004544	-1.24193	0.0438984	si:dkey-24p1.1	si:dkey-24p1.1 [Source:ZFIN;Acc:ZDB-GENE-060503-631]	cntn2	Bilateria	DOWN
ENSOMYG00000004544	-1.24193	0.0438984	si:dkey-24p1.1	si:dkey-24p1.1 [Source:ZFIN;Acc:ZDB-GENE-060503-631]	chl1b	Bilateria	DOWN
ENSOMYG00000004544	-1.24193	0.0438984	si:dkey-24p1.1	si:dkey-24p1.1 [Source:ZFIN;Acc:ZDB-GENE-060503-631]	nfasca	Bilateria	DOWN
ENSOMYG00000004544	-1.24193	0.0438984	si:dkey-24p1.1	si:dkey-24p1.1 [Source:ZFIN;Acc:ZDB-GENE-060503-631]	vcam1b	Bilateria	DOWN
ENSOMYG00000004544	-1.24193	0.0438984	si:dkey-24p1.1	si:dkey-24p1.1 [Source:ZFIN;Acc:ZDB-GENE-060503-631]	mxra5a	Bilateria	DOWN
ENSOMYG00000004544	-1.24193	0.0438984	si:dkey-24p1.1	si:dkey-24p1.1 [Source:ZFIN;Acc:ZDB-GENE-060503-631]	robo1	Bilateria	DOWN
ENSOMYG00000004544	-1.24193	0.0438984	si:dkey-24p1.1	si:dkey-24p1.1 [Source:ZFIN;Acc:ZDB-GENE-060503-631]	robo2	Bilateria	DOWN
ENSOMYG00000004701	-1.3205	3.61017e-05	sqlea	squalene epoxidase a [Source:ZFIN;Acc:ZDB-GENE-071004-98]	sqlea	Oncorhynchus	DOWN
ENSOMYG00000004943	2.45042	0.0233242	NA	NA	NA	Oncorhynchus mykiss	UP
ENSOMYG00000004943	2.45042	0.0233242	NA	NA	ciarta	Osteoglossocephalai	UP
ENSOMYG00000005320	1.45698	0.00551619	NA	NA	arg2	Salmoninae	UP
ENSOMYG00000005320	1.45698	0.00551619	NA	NA	NA	Gnathostomata	UP
ENSOMYG00000005320	1.45698	0.00551619	NA	NA	agmat	Bilateria	UP
ENSOMYG00000005344	1.38906	0.00409845	slc1a3a	solute carrier family 1 member 3a [Source:ZFIN;Acc:ZDB-GENE-030131-2159]	SLC1A3	Osteoglossocephalai	UP
ENSOMYG00000005344	1.38906	0.00409845	slc1a3a	solute carrier family 1 member 3a [Source:ZFIN;Acc:ZDB-GENE-030131-2159]	slc1a2a	Bilateria	UP
ENSOMYG00000005344	1.38906	0.00409845	slc1a3a	solute carrier family 1 member 3a [Source:ZFIN;Acc:ZDB-GENE-030131-2159]	slc1a2b	Bilateria	UP
ENSOMYG00000005344	1.38906	0.00409845	slc1a3a	solute carrier family 1 member 3a [Source:ZFIN;Acc:ZDB-GENE-030131-2159]	NA	Bilateria	UP
ENSOMYG00000005344	1.38906	0.00409845	slc1a3a	solute carrier family 1 member 3a [Source:ZFIN;Acc:ZDB-GENE-030131-2159]	slc1a7b	Bilateria	UP
ENSOMYG00000005344	1.38906	0.00409845	slc1a3a	solute carrier family 1 member 3a [Source:ZFIN;Acc:ZDB-GENE-030131-2159]	slc1a7a	Bilateria	UP
ENSOMYG00000005344	1.38906	0.00409845	slc1a3a	solute carrier family 1 member 3a [Source:ZFIN;Acc:ZDB-GENE-030131-2159]	slc1a1	Bilateria	UP
ENSOMYG00000005344	1.38906	0.00409845	slc1a3a	solute carrier family 1 member 3a [Source:ZFIN;Acc:ZDB-GENE-030131-2159]	slc1a8b	Bilateria	UP
ENSOMYG00000005344	1.38906	0.00409845	slc1a3a	solute carrier family 1 member 3a [Source:ZFIN;Acc:ZDB-GENE-030131-2159]	slc1a5	Bilateria	UP
ENSOMYG00000005344	1.38906	0.00409845	slc1a3a	solute carrier family 1 member 3a [Source:ZFIN;Acc:ZDB-GENE-030131-2159]	slc1a6	Bilateria	UP
ENSOMYG00000005425	2.59057	0.0369222	plek2	pleckstrin 2 [Source:ZFIN;Acc:ZDB-GENE-080219-2]	plek	Vertebrata	UP
ENSOMYG00000005445	1.65348	0.000804574	NA	NA	NA	Salmoninae	UP
ENSOMYG00000005445	1.65348	0.000804574	NA	NA	NA	Bilateria	UP
ENSOMYG00000005445	1.65348	0.000804574	NA	NA	sytl1	Bilateria	UP
ENSOMYG00000005445	1.65348	0.000804574	NA	NA	c2cd4a	Bilateria	UP
ENSOMYG00000005445	1.65348	0.000804574	NA	NA	syt11b	Bilateria	UP
ENSOMYG00000005445	1.65348	0.000804574	NA	NA	syt11a	Bilateria	UP
ENSOMYG00000005445	1.65348	0.000804574	NA	NA	syt6a	Bilateria	UP
ENSOMYG00000005445	1.65348	0.000804574	NA	NA	syt14b	Bilateria	UP
ENSOMYG00000005445	1.65348	0.000804574	NA	NA	sytl3	Bilateria	UP
ENSOMYG00000005445	1.65348	0.000804574	NA	NA	doc2b	Bilateria	UP
ENSOMYG00000005445	1.65348	0.000804574	NA	NA	doc2g	Bilateria	UP
ENSOMYG00000005445	1.65348	0.000804574	NA	NA	syt9a	Bilateria	UP
ENSOMYG00000005445	1.65348	0.000804574	NA	NA	syt9b	Bilateria	UP
ENSOMYG00000005445	1.65348	0.000804574	NA	NA	sytl2b	Bilateria	UP
ENSOMYG00000005445	1.65348	0.000804574	NA	NA	syt15	Bilateria	UP
ENSOMYG00000005445	1.65348	0.000804574	NA	NA	SYT8	Bilateria	UP
ENSOMYG00000005445	1.65348	0.000804574	NA	NA	sytl5	Bilateria	UP
ENSOMYG00000005445	1.65348	0.000804574	NA	NA	syt3	Bilateria	UP
ENSOMYG00000005445	1.65348	0.000804574	NA	NA	syt7b	Bilateria	UP
ENSOMYG00000005445	1.65348	0.000804574	NA	NA	syt12	Bilateria	UP
ENSOMYG00000005445	1.65348	0.000804574	NA	NA	doc2a	Bilateria	UP
ENSOMYG00000005445	1.65348	0.000804574	NA	NA	SYTL4	Bilateria	UP
ENSOMYG00000005445	1.65348	0.000804574	NA	NA	syt5a	Bilateria	UP
ENSOMYG00000005596	-1.5736	0.010456	SPATA1	spermatogenesis associated 1 [Source:HGNC Symbol;Acc:HGNC:14682]	NA	NA	DOWN
ENSOMYG00000005625	1.63575	0.0257936	mfsd2ab	MFSD2 lysolipid transporter A, lysophospholipid b [Source:ZFIN;Acc:ZDB-GENE-040801-89]	mfsd2ab	Salmoninae	UP
ENSOMYG00000005625	1.63575	0.0257936	mfsd2ab	MFSD2 lysolipid transporter A, lysophospholipid b [Source:ZFIN;Acc:ZDB-GENE-040801-89]	mfsd2aa	Osteoglossocephalai	UP
ENSOMYG00000005625	1.63575	0.0257936	mfsd2ab	MFSD2 lysolipid transporter A, lysophospholipid b [Source:ZFIN;Acc:ZDB-GENE-040801-89]	NA	Vertebrata	UP
ENSOMYG00000005625	1.63575	0.0257936	mfsd2ab	MFSD2 lysolipid transporter A, lysophospholipid b [Source:ZFIN;Acc:ZDB-GENE-040801-89]	mfsd2al2	Vertebrata	UP
ENSOMYG00000005625	1.63575	0.0257936	mfsd2ab	MFSD2 lysolipid transporter A, lysophospholipid b [Source:ZFIN;Acc:ZDB-GENE-040801-89]	mfsd2b	Vertebrata	UP
ENSOMYG00000005625	1.63575	0.0257936	mfsd2ab	MFSD2 lysolipid transporter A, lysophospholipid b [Source:ZFIN;Acc:ZDB-GENE-040801-89]	NA	Chordata	UP
ENSOMYG00000005625	1.63575	0.0257936	mfsd2ab	MFSD2 lysolipid transporter A, lysophospholipid b [Source:ZFIN;Acc:ZDB-GENE-040801-89]	mfsd12a	Chordata	UP
ENSOMYG00000005634	1.51495	0.0136105	NA	NA	NA	Salmoninae	UP
ENSOMYG00000005634	1.51495	0.0136105	NA	NA	dnajb9a	Osteoglossocephalai	UP
ENSOMYG00000005634	1.51495	0.0136105	NA	NA	NA	Vertebrata	UP
ENSOMYG00000005634	1.51495	0.0136105	NA	NA	NA	Opisthokonta	UP
ENSOMYG00000005634	1.51495	0.0136105	NA	NA	dnajb4	Opisthokonta	UP
ENSOMYG00000005634	1.51495	0.0136105	NA	NA	dnajb13	Opisthokonta	UP
ENSOMYG00000005634	1.51495	0.0136105	NA	NA	dnajb1a	Opisthokonta	UP
ENSOMYG00000005634	1.51495	0.0136105	NA	NA	dnajb1b	Opisthokonta	UP
ENSOMYG00000005634	1.51495	0.0136105	NA	NA	dnajb6b	Opisthokonta	UP
ENSOMYG00000005634	1.51495	0.0136105	NA	NA	dnajb11	Opisthokonta	UP
ENSOMYG00000005634	1.51495	0.0136105	NA	NA	dnajb12b	Opisthokonta	UP
ENSOMYG00000005634	1.51495	0.0136105	NA	NA	dnajb12a	Opisthokonta	UP
ENSOMYG00000005634	1.51495	0.0136105	NA	NA	dnajb5	Opisthokonta	UP
ENSOMYG00000005667	1.76324	0.00680591	slc43a1b	solute carrier family 43 member 1b [Source:ZFIN;Acc:ZDB-GENE-070209-173]	slc43a1b	Salmoninae	UP
ENSOMYG00000005667	1.76324	0.00680591	slc43a1b	solute carrier family 43 member 1b [Source:ZFIN;Acc:ZDB-GENE-070209-173]	slc43a1a	Osteoglossocephalai	UP
ENSOMYG00000005667	1.76324	0.00680591	slc43a1b	solute carrier family 43 member 1b [Source:ZFIN;Acc:ZDB-GENE-070209-173]	NA	Vertebrata	UP
ENSOMYG00000005667	1.76324	0.00680591	slc43a1b	solute carrier family 43 member 1b [Source:ZFIN;Acc:ZDB-GENE-070209-173]	SLC43A2	Vertebrata	UP
ENSOMYG00000005667	1.76324	0.00680591	slc43a1b	solute carrier family 43 member 1b [Source:ZFIN;Acc:ZDB-GENE-070209-173]	slc43a2b	Vertebrata	UP
ENSOMYG00000005712	1.64167	0.00279014	NA	NA	NA	Bilateria	UP
ENSOMYG00000005712	1.64167	0.00279014	NA	NA	NA	Salmoninae	UP
ENSOMYG00000006058	-2.12181	0.0171664	NA	NA	NA	Osteoglossocephalai	DOWN
ENSOMYG00000006058	-2.12181	0.0171664	NA	NA	NA	Neopterygii	DOWN
ENSOMYG00000006058	-2.12181	0.0171664	NA	NA	NA	Bilateria	DOWN
ENSOMYG00000006058	-2.12181	0.0171664	NA	NA	trim101	Bilateria	DOWN
ENSOMYG00000006058	-2.12181	0.0171664	NA	NA	TRIM13	Bilateria	DOWN
ENSOMYG00000006058	-2.12181	0.0171664	NA	NA	trim13	Bilateria	DOWN
ENSOMYG00000006058	-2.12181	0.0171664	NA	NA	trim55a	Bilateria	DOWN
ENSOMYG00000006058	-2.12181	0.0171664	NA	NA	trim54	Bilateria	DOWN
ENSOMYG00000006058	-2.12181	0.0171664	NA	NA	trim55b	Bilateria	DOWN
ENSOMYG00000006058	-2.12181	0.0171664	NA	NA	trim36	Bilateria	DOWN
ENSOMYG00000006058	-2.12181	0.0171664	NA	NA	trim66	Bilateria	DOWN
ENSOMYG00000006058	-2.12181	0.0171664	NA	NA	trim46a	Bilateria	DOWN
ENSOMYG00000006058	-2.12181	0.0171664	NA	NA	trim46b	Bilateria	DOWN
ENSOMYG00000006058	-2.12181	0.0171664	NA	NA	trim71	Bilateria	DOWN
ENSOMYG00000006058	-2.12181	0.0171664	NA	NA	btr02	Bilateria	DOWN
ENSOMYG00000006058	-2.12181	0.0171664	NA	NA	trim44	Bilateria	DOWN
ENSOMYG00000006058	-2.12181	0.0171664	NA	NA	TRIM32	Bilateria	DOWN
ENSOMYG00000006058	-2.12181	0.0171664	NA	NA	si:ch73-54f23.4	Bilateria	DOWN
ENSOMYG00000006058	-2.12181	0.0171664	NA	NA	zgc:194990	Bilateria	DOWN
ENSOMYG00000006058	-2.12181	0.0171664	NA	NA	si:dkey-219e21.2	Bilateria	DOWN
ENSOMYG00000006058	-2.12181	0.0171664	NA	NA	trim37	Bilateria	DOWN
ENSOMYG00000006058	-2.12181	0.0171664	NA	NA	trim2a	Bilateria	DOWN
ENSOMYG00000006058	-2.12181	0.0171664	NA	NA	trim2b	Bilateria	DOWN
ENSOMYG00000006058	-2.12181	0.0171664	NA	NA	TRIM8	Bilateria	DOWN
ENSOMYG00000006058	-2.12181	0.0171664	NA	NA	ftr83	Bilateria	DOWN
ENSOMYG00000006058	-2.12181	0.0171664	NA	NA	ftr82	Bilateria	DOWN
ENSOMYG00000006058	-2.12181	0.0171664	NA	NA	trim59	Bilateria	DOWN
ENSOMYG00000006058	-2.12181	0.0171664	NA	NA	btr12	Bilateria	DOWN
ENSOMYG00000006058	-2.12181	0.0171664	NA	NA	trim3a	Bilateria	DOWN
ENSOMYG00000006058	-2.12181	0.0171664	NA	NA	trim3b	Bilateria	DOWN
ENSOMYG00000006058	-2.12181	0.0171664	NA	NA	trim16	Bilateria	DOWN
ENSOMYG00000006058	-2.12181	0.0171664	NA	NA	trim47	Bilateria	DOWN
ENSOMYG00000006058	-2.12181	0.0171664	NA	NA	si:dkey-183c6.9	Bilateria	DOWN
ENSOMYG00000006058	-2.12181	0.0171664	NA	NA	TRIM67	Bilateria	DOWN
ENSOMYG00000006058	-2.12181	0.0171664	NA	NA	trim9	Bilateria	DOWN
ENSOMYG00000006058	-2.12181	0.0171664	NA	NA	bspry	Bilateria	DOWN
ENSOMYG00000006058	-2.12181	0.0171664	NA	NA	trim107	Bilateria	DOWN
ENSOMYG00000006058	-2.12181	0.0171664	NA	NA	trim33	Bilateria	DOWN
ENSOMYG00000006058	-2.12181	0.0171664	NA	NA	mid1	Bilateria	DOWN
ENSOMYG00000006058	-2.12181	0.0171664	NA	NA	trim69	Bilateria	DOWN
ENSOMYG00000006058	-2.12181	0.0171664	NA	NA	trim105	Bilateria	DOWN
ENSOMYG00000006058	-2.12181	0.0171664	NA	NA	mid2	Bilateria	DOWN
ENSOMYG00000006058	-2.12181	0.0171664	NA	NA	trim25	Bilateria	DOWN
ENSOMYG00000006058	-2.12181	0.0171664	NA	NA	trim63a	Bilateria	DOWN
ENSOMYG00000006110	5.14191	0.000445629	NA	NA	SPMIP1	Gnathostomata	UP
ENSOMYG00000006137	-1.34133	7.75827e-07	NA	nuclear receptor subfamily 0, group B, member 2b [Source:ZFIN;Acc:ZDB-GENE-080403-9]	NA	Salmoninae	DOWN
ENSOMYG00000006137	-1.34133	7.75827e-07	NA	nuclear receptor subfamily 0, group B, member 2b [Source:ZFIN;Acc:ZDB-GENE-080403-9]	nr0b2a	Osteoglossocephalai	DOWN
ENSOMYG00000006137	-1.34133	7.75827e-07	NA	nuclear receptor subfamily 0, group B, member 2b [Source:ZFIN;Acc:ZDB-GENE-080403-9]	NA	Gnathostomata	DOWN
ENSOMYG00000006152	-1.34388	0.029438	ncaph	non-SMC condensin I complex, subunit H [Source:ZFIN;Acc:ZDB-GENE-070112-652]	ncaph	Salmoninae	DOWN
ENSOMYG00000006280	-1.2414	0.0445895	NA	NA	CIT	Osteoglossocephalai	DOWN
ENSOMYG00000006280	-1.2414	0.0445895	NA	NA	ROCK2	Bilateria	DOWN
ENSOMYG00000006280	-1.2414	0.0445895	NA	NA	NA	Bilateria	DOWN
ENSOMYG00000006280	-1.2414	0.0445895	NA	NA	cdc42bpab	Bilateria	DOWN
ENSOMYG00000006280	-1.2414	0.0445895	NA	NA	cdc42bpb	Bilateria	DOWN
ENSOMYG00000006327	2.50075	1.28639e-09	NA	NA	NA	NA	UP
ENSOMYG00000006578	-1.25099	0.000394304	NA	NA	NA	Salmoninae	DOWN
ENSOMYG00000006578	-1.25099	0.000394304	NA	NA	rftn1a	Osteoglossocephalai	DOWN
ENSOMYG00000006578	-1.25099	0.000394304	NA	NA	NA	Osteoglossocephalai	DOWN
ENSOMYG00000006578	-1.25099	0.000394304	NA	NA	rftn2	Gnathostomata	DOWN
ENSOMYG00000006658	1.36113	0.00965236	NA	myosin VIIBb [Source:ZFIN;Acc:ZDB-GENE-070912-482]	NA	Opisthokonta	UP
ENSOMYG00000006658	1.36113	0.00965236	NA	myosin VIIBb [Source:ZFIN;Acc:ZDB-GENE-070912-482]	myo7aa	Opisthokonta	UP
ENSOMYG00000006658	1.36113	0.00965236	NA	myosin VIIBb [Source:ZFIN;Acc:ZDB-GENE-070912-482]	ccdc102a	Opisthokonta	UP
ENSOMYG00000006658	1.36113	0.00965236	NA	myosin VIIBb [Source:ZFIN;Acc:ZDB-GENE-070912-482]	myo1f	Opisthokonta	UP
ENSOMYG00000006658	1.36113	0.00965236	NA	myosin VIIBb [Source:ZFIN;Acc:ZDB-GENE-070912-482]	myo1cb	Opisthokonta	UP
ENSOMYG00000006658	1.36113	0.00965236	NA	myosin VIIBb [Source:ZFIN;Acc:ZDB-GENE-070912-482]	myo10	Opisthokonta	UP
ENSOMYG00000006658	1.36113	0.00965236	NA	myosin VIIBb [Source:ZFIN;Acc:ZDB-GENE-070912-482]	MYO5A	Opisthokonta	UP
ENSOMYG00000006658	1.36113	0.00965236	NA	myosin VIIBb [Source:ZFIN;Acc:ZDB-GENE-070912-482]	MYO3B	Opisthokonta	UP
ENSOMYG00000006658	1.36113	0.00965236	NA	myosin VIIBb [Source:ZFIN;Acc:ZDB-GENE-070912-482]	myo5b	Opisthokonta	UP
ENSOMYG00000006658	1.36113	0.00965236	NA	myosin VIIBb [Source:ZFIN;Acc:ZDB-GENE-070912-482]	mbd3b	Opisthokonta	UP
ENSOMYG00000006658	1.36113	0.00965236	NA	myosin VIIBb [Source:ZFIN;Acc:ZDB-GENE-070912-482]	MYO15A	Opisthokonta	UP
ENSOMYG00000006658	1.36113	0.00965236	NA	myosin VIIBb [Source:ZFIN;Acc:ZDB-GENE-070912-482]	MYO1E	Opisthokonta	UP
ENSOMYG00000006658	1.36113	0.00965236	NA	myosin VIIBb [Source:ZFIN;Acc:ZDB-GENE-070912-482]	MYO19	Opisthokonta	UP
ENSOMYG00000006658	1.36113	0.00965236	NA	myosin VIIBb [Source:ZFIN;Acc:ZDB-GENE-070912-482]	MYO9A	Opisthokonta	UP
ENSOMYG00000006658	1.36113	0.00965236	NA	myosin VIIBb [Source:ZFIN;Acc:ZDB-GENE-070912-482]	MYO1H	Opisthokonta	UP
ENSOMYG00000006658	1.36113	0.00965236	NA	myosin VIIBb [Source:ZFIN;Acc:ZDB-GENE-070912-482]	myo1ca	Opisthokonta	UP
ENSOMYG00000006658	1.36113	0.00965236	NA	myosin VIIBb [Source:ZFIN;Acc:ZDB-GENE-070912-482]	myo3a	Opisthokonta	UP
ENSOMYG00000006658	1.36113	0.00965236	NA	myosin VIIBb [Source:ZFIN;Acc:ZDB-GENE-070912-482]	myo9b	Opisthokonta	UP
ENSOMYG00000006658	1.36113	0.00965236	NA	myosin VIIBb [Source:ZFIN;Acc:ZDB-GENE-070912-482]	MYH11	Opisthokonta	UP
ENSOMYG00000006658	1.36113	0.00965236	NA	myosin VIIBb [Source:ZFIN;Acc:ZDB-GENE-070912-482]	MYH6	Opisthokonta	UP
ENSOMYG00000006658	1.36113	0.00965236	NA	myosin VIIBb [Source:ZFIN;Acc:ZDB-GENE-070912-482]	myh7	Opisthokonta	UP
ENSOMYG00000006658	1.36113	0.00965236	NA	myosin VIIBb [Source:ZFIN;Acc:ZDB-GENE-070912-482]	MYO16	Opisthokonta	UP
ENSOMYG00000006658	1.36113	0.00965236	NA	myosin VIIBb [Source:ZFIN;Acc:ZDB-GENE-070912-482]	myo18aa	Opisthokonta	UP
ENSOMYG00000006658	1.36113	0.00965236	NA	myosin VIIBb [Source:ZFIN;Acc:ZDB-GENE-070912-482]	tmf1	Opisthokonta	UP
ENSOMYG00000006658	1.36113	0.00965236	NA	myosin VIIBb [Source:ZFIN;Acc:ZDB-GENE-070912-482]	myo1g	Opisthokonta	UP
ENSOMYG00000006658	1.36113	0.00965236	NA	myosin VIIBb [Source:ZFIN;Acc:ZDB-GENE-070912-482]	CGNL1	Opisthokonta	UP
ENSOMYG00000006658	1.36113	0.00965236	NA	myosin VIIBb [Source:ZFIN;Acc:ZDB-GENE-070912-482]	cgnb	Opisthokonta	UP
ENSOMYG00000006658	1.36113	0.00965236	NA	myosin VIIBb [Source:ZFIN;Acc:ZDB-GENE-070912-482]	myo1eb	Opisthokonta	UP
ENSOMYG00000006658	1.36113	0.00965236	NA	myosin VIIBb [Source:ZFIN;Acc:ZDB-GENE-070912-482]	MYO18B	Opisthokonta	UP
ENSOMYG00000006658	1.36113	0.00965236	NA	myosin VIIBb [Source:ZFIN;Acc:ZDB-GENE-070912-482]	myh10	Opisthokonta	UP
ENSOMYG00000006658	1.36113	0.00965236	NA	myosin VIIBb [Source:ZFIN;Acc:ZDB-GENE-070912-482]	myo1d	Opisthokonta	UP
ENSOMYG00000006658	1.36113	0.00965236	NA	myosin VIIBb [Source:ZFIN;Acc:ZDB-GENE-070912-482]	myo6a	Opisthokonta	UP
ENSOMYG00000006658	1.36113	0.00965236	NA	myosin VIIBb [Source:ZFIN;Acc:ZDB-GENE-070912-482]	MYO6	Opisthokonta	UP
ENSOMYG00000006658	1.36113	0.00965236	NA	myosin VIIBb [Source:ZFIN;Acc:ZDB-GENE-070912-482]	NA	Salmoninae	UP
ENSOMYG00000006658	1.36113	0.00965236	NA	myosin VIIBb [Source:ZFIN;Acc:ZDB-GENE-070912-482]	NA	Osteoglossocephalai	UP
ENSOMYG00000006804	3.97437	0.0151355	NA	NA	NA	NA	UP
ENSOMYG00000007020	1.00317	0.00858231	rab5ab	RAB5A, member RAS oncogene family, b [Source:ZFIN;Acc:ZDB-GENE-040122-3]	rab25b	Opisthokonta	UP
ENSOMYG00000007020	1.00317	0.00858231	rab5ab	RAB5A, member RAS oncogene family, b [Source:ZFIN;Acc:ZDB-GENE-040122-3]	NA	Opisthokonta	UP
ENSOMYG00000007020	1.00317	0.00858231	rab5ab	RAB5A, member RAS oncogene family, b [Source:ZFIN;Acc:ZDB-GENE-040122-3]	rab34a	Opisthokonta	UP
ENSOMYG00000007020	1.00317	0.00858231	rab5ab	RAB5A, member RAS oncogene family, b [Source:ZFIN;Acc:ZDB-GENE-040122-3]	RAB34	Opisthokonta	UP
ENSOMYG00000007020	1.00317	0.00858231	rab5ab	RAB5A, member RAS oncogene family, b [Source:ZFIN;Acc:ZDB-GENE-040122-3]	rab11ba	Opisthokonta	UP
ENSOMYG00000007020	1.00317	0.00858231	rab5ab	RAB5A, member RAS oncogene family, b [Source:ZFIN;Acc:ZDB-GENE-040122-3]	rb11a	Opisthokonta	UP
ENSOMYG00000007020	1.00317	0.00858231	rab5ab	RAB5A, member RAS oncogene family, b [Source:ZFIN;Acc:ZDB-GENE-040122-3]	rab32a	Opisthokonta	UP
ENSOMYG00000007020	1.00317	0.00858231	rab5ab	RAB5A, member RAS oncogene family, b [Source:ZFIN;Acc:ZDB-GENE-040122-3]	rab32b	Opisthokonta	UP
ENSOMYG00000007020	1.00317	0.00858231	rab5ab	RAB5A, member RAS oncogene family, b [Source:ZFIN;Acc:ZDB-GENE-040122-3]	rab3aa	Opisthokonta	UP
ENSOMYG00000007020	1.00317	0.00858231	rab5ab	RAB5A, member RAS oncogene family, b [Source:ZFIN;Acc:ZDB-GENE-040122-3]	rab3ab	Opisthokonta	UP
ENSOMYG00000007020	1.00317	0.00858231	rab5ab	RAB5A, member RAS oncogene family, b [Source:ZFIN;Acc:ZDB-GENE-040122-3]	rab3c	Opisthokonta	UP
ENSOMYG00000007020	1.00317	0.00858231	rab5ab	RAB5A, member RAS oncogene family, b [Source:ZFIN;Acc:ZDB-GENE-040122-3]	RAB3C	Opisthokonta	UP
ENSOMYG00000007020	1.00317	0.00858231	rab5ab	RAB5A, member RAS oncogene family, b [Source:ZFIN;Acc:ZDB-GENE-040122-3]	RAB17	Opisthokonta	UP
ENSOMYG00000007020	1.00317	0.00858231	rab5ab	RAB5A, member RAS oncogene family, b [Source:ZFIN;Acc:ZDB-GENE-040122-3]	rab13	Opisthokonta	UP
ENSOMYG00000007020	1.00317	0.00858231	rab5ab	RAB5A, member RAS oncogene family, b [Source:ZFIN;Acc:ZDB-GENE-040122-3]	rab11a	Opisthokonta	UP
ENSOMYG00000007020	1.00317	0.00858231	rab5ab	RAB5A, member RAS oncogene family, b [Source:ZFIN;Acc:ZDB-GENE-040122-3]	RAB11A	Opisthokonta	UP
ENSOMYG00000007020	1.00317	0.00858231	rab5ab	RAB5A, member RAS oncogene family, b [Source:ZFIN;Acc:ZDB-GENE-040122-3]	RAB38	Opisthokonta	UP
ENSOMYG00000007020	1.00317	0.00858231	rab5ab	RAB5A, member RAS oncogene family, b [Source:ZFIN;Acc:ZDB-GENE-040122-3]	rab33a	Opisthokonta	UP
ENSOMYG00000007020	1.00317	0.00858231	rab5ab	RAB5A, member RAS oncogene family, b [Source:ZFIN;Acc:ZDB-GENE-040122-3]	rabl2	Opisthokonta	UP
ENSOMYG00000007020	1.00317	0.00858231	rab5ab	RAB5A, member RAS oncogene family, b [Source:ZFIN;Acc:ZDB-GENE-040122-3]	rab20	Opisthokonta	UP
ENSOMYG00000007020	1.00317	0.00858231	rab5ab	RAB5A, member RAS oncogene family, b [Source:ZFIN;Acc:ZDB-GENE-040122-3]	rab40c	Opisthokonta	UP
ENSOMYG00000007020	1.00317	0.00858231	rab5ab	RAB5A, member RAS oncogene family, b [Source:ZFIN;Acc:ZDB-GENE-040122-3]	rab8a	Opisthokonta	UP
ENSOMYG00000007020	1.00317	0.00858231	rab5ab	RAB5A, member RAS oncogene family, b [Source:ZFIN;Acc:ZDB-GENE-040122-3]	rab9b	Opisthokonta	UP
ENSOMYG00000007020	1.00317	0.00858231	rab5ab	RAB5A, member RAS oncogene family, b [Source:ZFIN;Acc:ZDB-GENE-040122-3]	rab36	Opisthokonta	UP
ENSOMYG00000007020	1.00317	0.00858231	rab5ab	RAB5A, member RAS oncogene family, b [Source:ZFIN;Acc:ZDB-GENE-040122-3]	RAB28	Opisthokonta	UP
ENSOMYG00000007020	1.00317	0.00858231	rab5ab	RAB5A, member RAS oncogene family, b [Source:ZFIN;Acc:ZDB-GENE-040122-3]	zgc:162171	Opisthokonta	UP
ENSOMYG00000007020	1.00317	0.00858231	rab5ab	RAB5A, member RAS oncogene family, b [Source:ZFIN;Acc:ZDB-GENE-040122-3]	rab38c	Opisthokonta	UP
ENSOMYG00000007020	1.00317	0.00858231	rab5ab	RAB5A, member RAS oncogene family, b [Source:ZFIN;Acc:ZDB-GENE-040122-3]	RAB5C	Opisthokonta	UP
ENSOMYG00000007020	1.00317	0.00858231	rab5ab	RAB5A, member RAS oncogene family, b [Source:ZFIN;Acc:ZDB-GENE-040122-3]	rab5c	Opisthokonta	UP
ENSOMYG00000007020	1.00317	0.00858231	rab5ab	RAB5A, member RAS oncogene family, b [Source:ZFIN;Acc:ZDB-GENE-040122-3]	rab11bb	Opisthokonta	UP
ENSOMYG00000007020	1.00317	0.00858231	rab5ab	RAB5A, member RAS oncogene family, b [Source:ZFIN;Acc:ZDB-GENE-040122-3]	rab6bb	Opisthokonta	UP
ENSOMYG00000007020	1.00317	0.00858231	rab5ab	RAB5A, member RAS oncogene family, b [Source:ZFIN;Acc:ZDB-GENE-040122-3]	rab6ba	Opisthokonta	UP
ENSOMYG00000007020	1.00317	0.00858231	rab5ab	RAB5A, member RAS oncogene family, b [Source:ZFIN;Acc:ZDB-GENE-040122-3]	rab3b	Opisthokonta	UP
ENSOMYG00000007020	1.00317	0.00858231	rab5ab	RAB5A, member RAS oncogene family, b [Source:ZFIN;Acc:ZDB-GENE-040122-3]	rab11al	Opisthokonta	UP
ENSOMYG00000007020	1.00317	0.00858231	rab5ab	RAB5A, member RAS oncogene family, b [Source:ZFIN;Acc:ZDB-GENE-040122-3]	dnajc27	Opisthokonta	UP
ENSOMYG00000007020	1.00317	0.00858231	rab5ab	RAB5A, member RAS oncogene family, b [Source:ZFIN;Acc:ZDB-GENE-040122-3]	rab12	Opisthokonta	UP
ENSOMYG00000007020	1.00317	0.00858231	rab5ab	RAB5A, member RAS oncogene family, b [Source:ZFIN;Acc:ZDB-GENE-040122-3]	rab30	Opisthokonta	UP
ENSOMYG00000007020	1.00317	0.00858231	rab5ab	RAB5A, member RAS oncogene family, b [Source:ZFIN;Acc:ZDB-GENE-040122-3]	rab18a	Opisthokonta	UP
ENSOMYG00000007020	1.00317	0.00858231	rab5ab	RAB5A, member RAS oncogene family, b [Source:ZFIN;Acc:ZDB-GENE-040122-3]	rab5b	Opisthokonta	UP
ENSOMYG00000007020	1.00317	0.00858231	rab5ab	RAB5A, member RAS oncogene family, b [Source:ZFIN;Acc:ZDB-GENE-040122-3]	si:dkey-16l2.16	Opisthokonta	UP
ENSOMYG00000007020	1.00317	0.00858231	rab5ab	RAB5A, member RAS oncogene family, b [Source:ZFIN;Acc:ZDB-GENE-040122-3]	rab43	Opisthokonta	UP
ENSOMYG00000007020	1.00317	0.00858231	rab5ab	RAB5A, member RAS oncogene family, b [Source:ZFIN;Acc:ZDB-GENE-040122-3]	RAB9A	Opisthokonta	UP
ENSOMYG00000007020	1.00317	0.00858231	rab5ab	RAB5A, member RAS oncogene family, b [Source:ZFIN;Acc:ZDB-GENE-040122-3]	RAB27A	Opisthokonta	UP
ENSOMYG00000007020	1.00317	0.00858231	rab5ab	RAB5A, member RAS oncogene family, b [Source:ZFIN;Acc:ZDB-GENE-040122-3]	rab3db	Opisthokonta	UP
ENSOMYG00000007020	1.00317	0.00858231	rab5ab	RAB5A, member RAS oncogene family, b [Source:ZFIN;Acc:ZDB-GENE-040122-3]	rab22a	Opisthokonta	UP
ENSOMYG00000007020	1.00317	0.00858231	rab5ab	RAB5A, member RAS oncogene family, b [Source:ZFIN;Acc:ZDB-GENE-040122-3]	rab4b	Opisthokonta	UP
ENSOMYG00000007020	1.00317	0.00858231	rab5ab	RAB5A, member RAS oncogene family, b [Source:ZFIN;Acc:ZDB-GENE-040122-3]	rab42a	Opisthokonta	UP
ENSOMYG00000007020	1.00317	0.00858231	rab5ab	RAB5A, member RAS oncogene family, b [Source:ZFIN;Acc:ZDB-GENE-040122-3]	RAB27B	Opisthokonta	UP
ENSOMYG00000007020	1.00317	0.00858231	rab5ab	RAB5A, member RAS oncogene family, b [Source:ZFIN;Acc:ZDB-GENE-040122-3]	rab33ba	Opisthokonta	UP
ENSOMYG00000007020	1.00317	0.00858231	rab5ab	RAB5A, member RAS oncogene family, b [Source:ZFIN;Acc:ZDB-GENE-040122-3]	rab23	Opisthokonta	UP
ENSOMYG00000007020	1.00317	0.00858231	rab5ab	RAB5A, member RAS oncogene family, b [Source:ZFIN;Acc:ZDB-GENE-040122-3]	rab40b	Opisthokonta	UP
ENSOMYG00000007020	1.00317	0.00858231	rab5ab	RAB5A, member RAS oncogene family, b [Source:ZFIN;Acc:ZDB-GENE-040122-3]	RAB31	Opisthokonta	UP
ENSOMYG00000007020	1.00317	0.00858231	rab5ab	RAB5A, member RAS oncogene family, b [Source:ZFIN;Acc:ZDB-GENE-040122-3]	RAB24	Opisthokonta	UP
ENSOMYG00000007020	1.00317	0.00858231	rab5ab	RAB5A, member RAS oncogene family, b [Source:ZFIN;Acc:ZDB-GENE-040122-3]	rab24	Opisthokonta	UP
ENSOMYG00000007020	1.00317	0.00858231	rab5ab	RAB5A, member RAS oncogene family, b [Source:ZFIN;Acc:ZDB-GENE-040122-3]	rab2a	Opisthokonta	UP
ENSOMYG00000007020	1.00317	0.00858231	rab5ab	RAB5A, member RAS oncogene family, b [Source:ZFIN;Acc:ZDB-GENE-040122-3]	rab41	Opisthokonta	UP
ENSOMYG00000007020	1.00317	0.00858231	rab5ab	RAB5A, member RAS oncogene family, b [Source:ZFIN;Acc:ZDB-GENE-040122-3]	rab6a	Opisthokonta	UP
ENSOMYG00000007020	1.00317	0.00858231	rab5ab	RAB5A, member RAS oncogene family, b [Source:ZFIN;Acc:ZDB-GENE-040122-3]	rab35b	Opisthokonta	UP
ENSOMYG00000007020	1.00317	0.00858231	rab5ab	RAB5A, member RAS oncogene family, b [Source:ZFIN;Acc:ZDB-GENE-040122-3]	rab15	Opisthokonta	UP
ENSOMYG00000007020	1.00317	0.00858231	rab5ab	RAB5A, member RAS oncogene family, b [Source:ZFIN;Acc:ZDB-GENE-040122-3]	rab7b	Opisthokonta	UP
ENSOMYG00000007020	1.00317	0.00858231	rab5ab	RAB5A, member RAS oncogene family, b [Source:ZFIN;Acc:ZDB-GENE-040122-3]	RAB7A	Opisthokonta	UP
ENSOMYG00000007020	1.00317	0.00858231	rab5ab	RAB5A, member RAS oncogene family, b [Source:ZFIN;Acc:ZDB-GENE-040122-3]	rab7a	Opisthokonta	UP
ENSOMYG00000007020	1.00317	0.00858231	rab5ab	RAB5A, member RAS oncogene family, b [Source:ZFIN;Acc:ZDB-GENE-040122-3]	rab4a	Opisthokonta	UP
ENSOMYG00000007020	1.00317	0.00858231	rab5ab	RAB5A, member RAS oncogene family, b [Source:ZFIN;Acc:ZDB-GENE-040122-3]	rasef2	Opisthokonta	UP
ENSOMYG00000007020	1.00317	0.00858231	rab5ab	RAB5A, member RAS oncogene family, b [Source:ZFIN;Acc:ZDB-GENE-040122-3]	rab5ab	Salmoninae	UP
ENSOMYG00000007020	1.00317	0.00858231	rab5ab	RAB5A, member RAS oncogene family, b [Source:ZFIN;Acc:ZDB-GENE-040122-3]	rab5aa	Euteleostomi	UP
ENSOMYG00000007073	1.27425	0.0421951	pdcd4b	programmed cell death 4b [Source:ZFIN;Acc:ZDB-GENE-030131-9847]	pdcd4b	Oncorhynchus mykiss	UP
ENSOMYG00000007073	1.27425	0.0421951	pdcd4b	programmed cell death 4b [Source:ZFIN;Acc:ZDB-GENE-030131-9847]	NA	Vertebrata	UP
ENSOMYG00000007441	-1.11468	0.000980655	tk1	thymidine kinase 1, soluble [Source:ZFIN;Acc:ZDB-GENE-030131-5801]	tk1	Oncorhynchus mykiss	DOWN
ENSOMYG00000007611	5.51945	1.15423e-10	NA	NA	NA	Vertebrata	UP
ENSOMYG00000007611	5.51945	1.15423e-10	NA	NA	CRYBB2	Vertebrata	UP
ENSOMYG00000007611	5.51945	1.15423e-10	NA	NA	crygmxl2	Vertebrata	UP
ENSOMYG00000007611	5.51945	1.15423e-10	NA	NA	crygmx	Vertebrata	UP
ENSOMYG00000007611	5.51945	1.15423e-10	NA	NA	crybgx	Vertebrata	UP
ENSOMYG00000007611	5.51945	1.15423e-10	NA	NA	cryba1a	Vertebrata	UP
ENSOMYG00000007611	5.51945	1.15423e-10	NA	NA	cryba4	Vertebrata	UP
ENSOMYG00000007611	5.51945	1.15423e-10	NA	NA	crybb1	Vertebrata	UP
ENSOMYG00000007611	5.51945	1.15423e-10	NA	NA	crybb1l3	Vertebrata	UP
ENSOMYG00000007611	5.51945	1.15423e-10	NA	NA	crybb1l2	Vertebrata	UP
ENSOMYG00000007611	5.51945	1.15423e-10	NA	NA	CRYBA2	Vertebrata	UP
ENSOMYG00000007611	5.51945	1.15423e-10	NA	NA	cryba1b	Vertebrata	UP
ENSOMYG00000007611	5.51945	1.15423e-10	NA	NA	crygmxl1	Vertebrata	UP
ENSOMYG00000007611	5.51945	1.15423e-10	NA	NA	crygs3	Vertebrata	UP
ENSOMYG00000007611	5.51945	1.15423e-10	NA	NA	crygn2	Vertebrata	UP
ENSOMYG00000007611	5.51945	1.15423e-10	NA	NA	crygm7	Vertebrata	UP
ENSOMYG00000007611	5.51945	1.15423e-10	NA	NA	crygm6	Vertebrata	UP
ENSOMYG00000007611	5.51945	1.15423e-10	NA	NA	si:dkey-57a22.15	Vertebrata	UP
ENSOMYG00000007611	5.51945	1.15423e-10	NA	NA	NA	Salmoninae	UP
ENSOMYG00000007611	5.51945	1.15423e-10	NA	NA	NA	Euteleosteomorpha	UP
ENSOMYG00000007637	1.19686	0.0143736	dhdds	dehydrodolichyl diphosphate synthase [Source:ZFIN;Acc:ZDB-GENE-040426-2236]	dhdds	Salmoninae	UP
ENSOMYG00000007658	1.37518	0.0284098	NA	NA	NA	Oncorhynchus	UP
ENSOMYG00000007708	1.32811	0.0199157	slc35b1	solute carrier family 35 member B1 [Source:ZFIN;Acc:ZDB-GENE-040912-148]	slc35b1	Salmoninae	UP
ENSOMYG00000007708	1.32811	0.0199157	slc35b1	solute carrier family 35 member B1 [Source:ZFIN;Acc:ZDB-GENE-040912-148]	slc35b2	Opisthokonta	UP
ENSOMYG00000007708	1.32811	0.0199157	slc35b1	solute carrier family 35 member B1 [Source:ZFIN;Acc:ZDB-GENE-040912-148]	slc35b4	Opisthokonta	UP
ENSOMYG00000007708	1.32811	0.0199157	slc35b1	solute carrier family 35 member B1 [Source:ZFIN;Acc:ZDB-GENE-040912-148]	slc35b3	Opisthokonta	UP
ENSOMYG00000007742	-1.29022	0.000764961	NA	NA	NA	Opisthokonta	DOWN
ENSOMYG00000007742	-1.29022	0.000764961	NA	NA	tubg1	Opisthokonta	DOWN
ENSOMYG00000007742	-1.29022	0.000764961	NA	NA	tubb2	Opisthokonta	DOWN
ENSOMYG00000007742	-1.29022	0.000764961	NA	NA	tuba7l	Opisthokonta	DOWN
ENSOMYG00000007742	-1.29022	0.000764961	NA	NA	tuba1b	Opisthokonta	DOWN
ENSOMYG00000007742	-1.29022	0.000764961	NA	NA	TUBB3	Opisthokonta	DOWN
ENSOMYG00000007742	-1.29022	0.000764961	NA	NA	tuba8l4	Opisthokonta	DOWN
ENSOMYG00000007742	-1.29022	0.000764961	NA	NA	tuba8l2	Opisthokonta	DOWN
ENSOMYG00000007742	-1.29022	0.000764961	NA	NA	tube1	Opisthokonta	DOWN
ENSOMYG00000007742	-1.29022	0.000764961	NA	NA	tubb5	Opisthokonta	DOWN
ENSOMYG00000007742	-1.29022	0.000764961	NA	NA	NA	Euteleostomi	DOWN
ENSOMYG00000007742	-1.29022	0.000764961	NA	NA	tubb2b	Vertebrata	DOWN
ENSOMYG00000007742	-1.29022	0.000764961	NA	NA	NA	Vertebrata	DOWN
ENSOMYG00000007756	-1.76212	0.0243629	kifc1	kinesin family member C1 [Source:ZFIN;Acc:ZDB-GENE-000208-21]	NA	Opisthokonta	DOWN
ENSOMYG00000007756	-1.76212	0.0243629	kifc1	kinesin family member C1 [Source:ZFIN;Acc:ZDB-GENE-000208-21]	KIF27	Opisthokonta	DOWN
ENSOMYG00000007756	-1.76212	0.0243629	kifc1	kinesin family member C1 [Source:ZFIN;Acc:ZDB-GENE-000208-21]	kif7	Opisthokonta	DOWN
ENSOMYG00000007756	-1.76212	0.0243629	kifc1	kinesin family member C1 [Source:ZFIN;Acc:ZDB-GENE-000208-21]	kif1aa	Opisthokonta	DOWN
ENSOMYG00000007756	-1.76212	0.0243629	kifc1	kinesin family member C1 [Source:ZFIN;Acc:ZDB-GENE-000208-21]	KIF5C	Opisthokonta	DOWN
ENSOMYG00000007756	-1.76212	0.0243629	kifc1	kinesin family member C1 [Source:ZFIN;Acc:ZDB-GENE-000208-21]	KIF20A	Opisthokonta	DOWN
ENSOMYG00000007756	-1.76212	0.0243629	kifc1	kinesin family member C1 [Source:ZFIN;Acc:ZDB-GENE-000208-21]	kif26ba	Opisthokonta	DOWN
ENSOMYG00000007756	-1.76212	0.0243629	kifc1	kinesin family member C1 [Source:ZFIN;Acc:ZDB-GENE-000208-21]	KIF19	Opisthokonta	DOWN
ENSOMYG00000007756	-1.76212	0.0243629	kifc1	kinesin family member C1 [Source:ZFIN;Acc:ZDB-GENE-000208-21]	KIF23	Opisthokonta	DOWN
ENSOMYG00000007756	-1.76212	0.0243629	kifc1	kinesin family member C1 [Source:ZFIN;Acc:ZDB-GENE-000208-21]	kif3a	Opisthokonta	DOWN
ENSOMYG00000007756	-1.76212	0.0243629	kifc1	kinesin family member C1 [Source:ZFIN;Acc:ZDB-GENE-000208-21]	kif21a	Opisthokonta	DOWN
ENSOMYG00000007756	-1.76212	0.0243629	kifc1	kinesin family member C1 [Source:ZFIN;Acc:ZDB-GENE-000208-21]	KIF21A	Opisthokonta	DOWN
ENSOMYG00000007756	-1.76212	0.0243629	kifc1	kinesin family member C1 [Source:ZFIN;Acc:ZDB-GENE-000208-21]	zgc:56231	Opisthokonta	DOWN
ENSOMYG00000007756	-1.76212	0.0243629	kifc1	kinesin family member C1 [Source:ZFIN;Acc:ZDB-GENE-000208-21]	kif17	Opisthokonta	DOWN
ENSOMYG00000007756	-1.76212	0.0243629	kifc1	kinesin family member C1 [Source:ZFIN;Acc:ZDB-GENE-000208-21]	kif25	Opisthokonta	DOWN
ENSOMYG00000007756	-1.76212	0.0243629	kifc1	kinesin family member C1 [Source:ZFIN;Acc:ZDB-GENE-000208-21]	kif3cb	Opisthokonta	DOWN
ENSOMYG00000007756	-1.76212	0.0243629	kifc1	kinesin family member C1 [Source:ZFIN;Acc:ZDB-GENE-000208-21]	kif3b	Opisthokonta	DOWN
ENSOMYG00000007756	-1.76212	0.0243629	kifc1	kinesin family member C1 [Source:ZFIN;Acc:ZDB-GENE-000208-21]	KIF3C	Opisthokonta	DOWN
ENSOMYG00000007756	-1.76212	0.0243629	kifc1	kinesin family member C1 [Source:ZFIN;Acc:ZDB-GENE-000208-21]	KIF5B	Opisthokonta	DOWN
ENSOMYG00000007756	-1.76212	0.0243629	kifc1	kinesin family member C1 [Source:ZFIN;Acc:ZDB-GENE-000208-21]	KIF18A	Opisthokonta	DOWN
ENSOMYG00000007756	-1.76212	0.0243629	kifc1	kinesin family member C1 [Source:ZFIN;Acc:ZDB-GENE-000208-21]	kif6	Opisthokonta	DOWN
ENSOMYG00000007756	-1.76212	0.0243629	kifc1	kinesin family member C1 [Source:ZFIN;Acc:ZDB-GENE-000208-21]	kif1b	Opisthokonta	DOWN
ENSOMYG00000007756	-1.76212	0.0243629	kifc1	kinesin family member C1 [Source:ZFIN;Acc:ZDB-GENE-000208-21]	kif4	Opisthokonta	DOWN
ENSOMYG00000007756	-1.76212	0.0243629	kifc1	kinesin family member C1 [Source:ZFIN;Acc:ZDB-GENE-000208-21]	kif11	Opisthokonta	DOWN
ENSOMYG00000007756	-1.76212	0.0243629	kifc1	kinesin family member C1 [Source:ZFIN;Acc:ZDB-GENE-000208-21]	kif2c	Opisthokonta	DOWN
ENSOMYG00000007756	-1.76212	0.0243629	kifc1	kinesin family member C1 [Source:ZFIN;Acc:ZDB-GENE-000208-21]	kif13ba	Opisthokonta	DOWN
ENSOMYG00000007756	-1.76212	0.0243629	kifc1	kinesin family member C1 [Source:ZFIN;Acc:ZDB-GENE-000208-21]	KIF5A	Opisthokonta	DOWN
ENSOMYG00000007756	-1.76212	0.0243629	kifc1	kinesin family member C1 [Source:ZFIN;Acc:ZDB-GENE-000208-21]	kif5aa	Opisthokonta	DOWN
ENSOMYG00000007756	-1.76212	0.0243629	kifc1	kinesin family member C1 [Source:ZFIN;Acc:ZDB-GENE-000208-21]	kif14	Opisthokonta	DOWN
ENSOMYG00000007756	-1.76212	0.0243629	kifc1	kinesin family member C1 [Source:ZFIN;Acc:ZDB-GENE-000208-21]	si:ch211-257p13.3	Opisthokonta	DOWN
ENSOMYG00000007826	1.06759	0.0271262	NA	si:ch211-262i1.6 [Source:ZFIN;Acc:ZDB-GENE-030131-6242]	NA	Salmoninae	UP
ENSOMYG00000007935	-1.25224	0.000245429	slc6a11a	solute carrier family 6 member 11a [Source:ZFIN;Acc:ZDB-GENE-030131-3729]	slc6a11a	Salmoninae	DOWN
ENSOMYG00000007935	-1.25224	0.000245429	slc6a11a	solute carrier family 6 member 11a [Source:ZFIN;Acc:ZDB-GENE-030131-3729]	NA	Protacanthopterygii	DOWN
ENSOMYG00000007935	-1.25224	0.000245429	slc6a11a	solute carrier family 6 member 11a [Source:ZFIN;Acc:ZDB-GENE-030131-3729]	NA	Clupeocephala	DOWN
ENSOMYG00000007935	-1.25224	0.000245429	slc6a11a	solute carrier family 6 member 11a [Source:ZFIN;Acc:ZDB-GENE-030131-3729]	NA	Osteoglossocephalai	DOWN
ENSOMYG00000007935	-1.25224	0.000245429	slc6a11a	solute carrier family 6 member 11a [Source:ZFIN;Acc:ZDB-GENE-030131-3729]	slc6a22.1	Neopterygii	DOWN
ENSOMYG00000007935	-1.25224	0.000245429	slc6a11a	solute carrier family 6 member 11a [Source:ZFIN;Acc:ZDB-GENE-030131-3729]	si:ch211-132b12.6	Bilateria	DOWN
ENSOMYG00000007935	-1.25224	0.000245429	slc6a11a	solute carrier family 6 member 11a [Source:ZFIN;Acc:ZDB-GENE-030131-3729]	NA	Bilateria	DOWN
ENSOMYG00000007935	-1.25224	0.000245429	slc6a11a	solute carrier family 6 member 11a [Source:ZFIN;Acc:ZDB-GENE-030131-3729]	SLC6A20	Bilateria	DOWN
ENSOMYG00000007935	-1.25224	0.000245429	slc6a11a	solute carrier family 6 member 11a [Source:ZFIN;Acc:ZDB-GENE-030131-3729]	si:ch211-117c9.5	Bilateria	DOWN
ENSOMYG00000007935	-1.25224	0.000245429	slc6a11a	solute carrier family 6 member 11a [Source:ZFIN;Acc:ZDB-GENE-030131-3729]	slc6a19b	Bilateria	DOWN
ENSOMYG00000007935	-1.25224	0.000245429	slc6a11a	solute carrier family 6 member 11a [Source:ZFIN;Acc:ZDB-GENE-030131-3729]	slc6a19a.2	Bilateria	DOWN
ENSOMYG00000007935	-1.25224	0.000245429	slc6a11a	solute carrier family 6 member 11a [Source:ZFIN;Acc:ZDB-GENE-030131-3729]	slc6a8	Bilateria	DOWN
ENSOMYG00000007935	-1.25224	0.000245429	slc6a11a	solute carrier family 6 member 11a [Source:ZFIN;Acc:ZDB-GENE-030131-3729]	slc6a22.2	Bilateria	DOWN
ENSOMYG00000007935	-1.25224	0.000245429	slc6a11a	solute carrier family 6 member 11a [Source:ZFIN;Acc:ZDB-GENE-030131-3729]	slc6a14	Bilateria	DOWN
ENSOMYG00000007935	-1.25224	0.000245429	slc6a11a	solute carrier family 6 member 11a [Source:ZFIN;Acc:ZDB-GENE-030131-3729]	slc6a7	Bilateria	DOWN
ENSOMYG00000007935	-1.25224	0.000245429	slc6a11a	solute carrier family 6 member 11a [Source:ZFIN;Acc:ZDB-GENE-030131-3729]	slc6a1a	Bilateria	DOWN
ENSOMYG00000007935	-1.25224	0.000245429	slc6a11a	solute carrier family 6 member 11a [Source:ZFIN;Acc:ZDB-GENE-030131-3729]	slc6a6b	Bilateria	DOWN
ENSOMYG00000007935	-1.25224	0.000245429	slc6a11a	solute carrier family 6 member 11a [Source:ZFIN;Acc:ZDB-GENE-030131-3729]	slc6a3	Bilateria	DOWN
ENSOMYG00000007935	-1.25224	0.000245429	slc6a11a	solute carrier family 6 member 11a [Source:ZFIN;Acc:ZDB-GENE-030131-3729]	slc6a9	Bilateria	DOWN
ENSOMYG00000007935	-1.25224	0.000245429	slc6a11a	solute carrier family 6 member 11a [Source:ZFIN;Acc:ZDB-GENE-030131-3729]	slc6a4a	Bilateria	DOWN
ENSOMYG00000007935	-1.25224	0.000245429	slc6a11a	solute carrier family 6 member 11a [Source:ZFIN;Acc:ZDB-GENE-030131-3729]	slc6a4b	Bilateria	DOWN
ENSOMYG00000007935	-1.25224	0.000245429	slc6a11a	solute carrier family 6 member 11a [Source:ZFIN;Acc:ZDB-GENE-030131-3729]	si:ch211-225b11.1	Bilateria	DOWN
ENSOMYG00000007935	-1.25224	0.000245429	slc6a11a	solute carrier family 6 member 11a [Source:ZFIN;Acc:ZDB-GENE-030131-3729]	slc6a17	Bilateria	DOWN
ENSOMYG00000007935	-1.25224	0.000245429	slc6a11a	solute carrier family 6 member 11a [Source:ZFIN;Acc:ZDB-GENE-030131-3729]	slc6a18	Bilateria	DOWN
ENSOMYG00000007935	-1.25224	0.000245429	slc6a11a	solute carrier family 6 member 11a [Source:ZFIN;Acc:ZDB-GENE-030131-3729]	slc6a15	Bilateria	DOWN
ENSOMYG00000007986	-1.96993	5.26848e-06	gins3	GINS complex subunit 3 [Source:ZFIN;Acc:ZDB-GENE-040721-1]	NA	NA	DOWN
ENSOMYG00000008363	-1.12297	0.000439428	capgb	capping protein (actin filament), gelsolin-like b [Source:ZFIN;Acc:ZDB-GENE-030131-8541]	NA	Bilateria	DOWN
ENSOMYG00000008363	-1.12297	0.000439428	capgb	capping protein (actin filament), gelsolin-like b [Source:ZFIN;Acc:ZDB-GENE-030131-8541]	svila	Bilateria	DOWN
ENSOMYG00000008363	-1.12297	0.000439428	capgb	capping protein (actin filament), gelsolin-like b [Source:ZFIN;Acc:ZDB-GENE-030131-8541]	gsna	Bilateria	DOWN
ENSOMYG00000008363	-1.12297	0.000439428	capgb	capping protein (actin filament), gelsolin-like b [Source:ZFIN;Acc:ZDB-GENE-030131-8541]	scinlb	Bilateria	DOWN
ENSOMYG00000008363	-1.12297	0.000439428	capgb	capping protein (actin filament), gelsolin-like b [Source:ZFIN;Acc:ZDB-GENE-030131-8541]	scinla	Bilateria	DOWN
ENSOMYG00000008363	-1.12297	0.000439428	capgb	capping protein (actin filament), gelsolin-like b [Source:ZFIN;Acc:ZDB-GENE-030131-8541]	svilc	Bilateria	DOWN
ENSOMYG00000008363	-1.12297	0.000439428	capgb	capping protein (actin filament), gelsolin-like b [Source:ZFIN;Acc:ZDB-GENE-030131-8541]	svild	Bilateria	DOWN
ENSOMYG00000008363	-1.12297	0.000439428	capgb	capping protein (actin filament), gelsolin-like b [Source:ZFIN;Acc:ZDB-GENE-030131-8541]	vill	Bilateria	DOWN
ENSOMYG00000008363	-1.12297	0.000439428	capgb	capping protein (actin filament), gelsolin-like b [Source:ZFIN;Acc:ZDB-GENE-030131-8541]	flii	Bilateria	DOWN
ENSOMYG00000008363	-1.12297	0.000439428	capgb	capping protein (actin filament), gelsolin-like b [Source:ZFIN;Acc:ZDB-GENE-030131-8541]	vil1	Bilateria	DOWN
ENSOMYG00000008363	-1.12297	0.000439428	capgb	capping protein (actin filament), gelsolin-like b [Source:ZFIN;Acc:ZDB-GENE-030131-8541]	scin	Bilateria	DOWN
ENSOMYG00000008363	-1.12297	0.000439428	capgb	capping protein (actin filament), gelsolin-like b [Source:ZFIN;Acc:ZDB-GENE-030131-8541]	capgb	Salmoninae	DOWN
ENSOMYG00000008375	1.30709	0.00239289	NA	NA	NA	Oncorhynchus mykiss	UP
ENSOMYG00000008375	1.30709	0.00239289	NA	NA	NA	Clupeocephala	UP
ENSOMYG00000008375	1.30709	0.00239289	NA	NA	NA	Opisthokonta	UP
ENSOMYG00000008375	1.30709	0.00239289	NA	NA	xylb	Opisthokonta	UP
ENSOMYG00000008375	1.30709	0.00239289	NA	NA	fggy	Opisthokonta	UP
ENSOMYG00000008375	1.30709	0.00239289	NA	NA	shpk	Opisthokonta	UP
ENSOMYG00000008424	1.2818	0.0480694	bcl2l1	BCL2 like 1 [Source:ZFIN;Acc:ZDB-GENE-010730-1]	bcl2l1	Salmoninae	UP
ENSOMYG00000008424	1.2818	0.0480694	bcl2l1	BCL2 like 1 [Source:ZFIN;Acc:ZDB-GENE-010730-1]	NA	Osteoglossocephalai	UP
ENSOMYG00000008424	1.2818	0.0480694	bcl2l1	BCL2 like 1 [Source:ZFIN;Acc:ZDB-GENE-010730-1]	NA	Vertebrata	UP
ENSOMYG00000008424	1.2818	0.0480694	bcl2l1	BCL2 like 1 [Source:ZFIN;Acc:ZDB-GENE-010730-1]	bcl2b	Vertebrata	UP
ENSOMYG00000008424	1.2818	0.0480694	bcl2l1	BCL2 like 1 [Source:ZFIN;Acc:ZDB-GENE-010730-1]	BCL2	Vertebrata	UP
ENSOMYG00000008424	1.2818	0.0480694	bcl2l1	BCL2 like 1 [Source:ZFIN;Acc:ZDB-GENE-010730-1]	bcl2l10	Bilateria	UP
ENSOMYG00000008424	1.2818	0.0480694	bcl2l1	BCL2 like 1 [Source:ZFIN;Acc:ZDB-GENE-010730-1]	NA	Bilateria	UP
ENSOMYG00000008424	1.2818	0.0480694	bcl2l1	BCL2 like 1 [Source:ZFIN;Acc:ZDB-GENE-010730-1]	mcl1b	Bilateria	UP
ENSOMYG00000008424	1.2818	0.0480694	bcl2l1	BCL2 like 1 [Source:ZFIN;Acc:ZDB-GENE-010730-1]	bokb	Bilateria	UP
ENSOMYG00000008424	1.2818	0.0480694	bcl2l1	BCL2 like 1 [Source:ZFIN;Acc:ZDB-GENE-010730-1]	baxa	Bilateria	UP
ENSOMYG00000008424	1.2818	0.0480694	bcl2l1	BCL2 like 1 [Source:ZFIN;Acc:ZDB-GENE-010730-1]	boka	Bilateria	UP
ENSOMYG00000008424	1.2818	0.0480694	bcl2l1	BCL2 like 1 [Source:ZFIN;Acc:ZDB-GENE-010730-1]	zgc:153993	Bilateria	UP
ENSOMYG00000008424	1.2818	0.0480694	bcl2l1	BCL2 like 1 [Source:ZFIN;Acc:ZDB-GENE-010730-1]	bcl2l16	Bilateria	UP
ENSOMYG00000008502	1.15642	0.0185682	NA	NA	NA	Salmoninae	UP
ENSOMYG00000008502	1.15642	0.0185682	NA	NA	fam219ab	Clupeocephala	UP
ENSOMYG00000008502	1.15642	0.0185682	NA	NA	fam219b	Vertebrata	UP
ENSOMYG00000008702	1.38312	0.0262921	trib3	tribbles pseudokinase 3 [Source:ZFIN;Acc:ZDB-GENE-040426-2609]	NA	Salmoninae	UP
ENSOMYG00000008702	1.38312	0.0262921	trib3	tribbles pseudokinase 3 [Source:ZFIN;Acc:ZDB-GENE-040426-2609]	NA	Chordata	UP
ENSOMYG00000008702	1.38312	0.0262921	trib3	tribbles pseudokinase 3 [Source:ZFIN;Acc:ZDB-GENE-040426-2609]	stk40	Chordata	UP
ENSOMYG00000008702	1.38312	0.0262921	trib3	tribbles pseudokinase 3 [Source:ZFIN;Acc:ZDB-GENE-040426-2609]	trib1	Chordata	UP
ENSOMYG00000008788	1.51326	0.00481709	mfsd13a	major facilitator superfamily domain containing 13A [Source:ZFIN;Acc:ZDB-GENE-041212-83]	NA	Salmoninae	UP
ENSOMYG00000008806	-1.06735	0.00288101	CSF1R	colony stimulating factor 1 receptor [Source:HGNC Symbol;Acc:HGNC:2433]	NA	Salmoninae	DOWN
ENSOMYG00000008806	-1.06735	0.00288101	CSF1R	colony stimulating factor 1 receptor [Source:HGNC Symbol;Acc:HGNC:2433]	NA	Osteoglossocephalai	DOWN
ENSOMYG00000008806	-1.06735	0.00288101	CSF1R	colony stimulating factor 1 receptor [Source:HGNC Symbol;Acc:HGNC:2433]	NA	Bilateria	DOWN
ENSOMYG00000008806	-1.06735	0.00288101	CSF1R	colony stimulating factor 1 receptor [Source:HGNC Symbol;Acc:HGNC:2433]	ddr2a	Bilateria	DOWN
ENSOMYG00000008806	-1.06735	0.00288101	CSF1R	colony stimulating factor 1 receptor [Source:HGNC Symbol;Acc:HGNC:2433]	ddr2l	Bilateria	DOWN
ENSOMYG00000008806	-1.06735	0.00288101	CSF1R	colony stimulating factor 1 receptor [Source:HGNC Symbol;Acc:HGNC:2433]	ryk	Bilateria	DOWN
ENSOMYG00000008806	-1.06735	0.00288101	CSF1R	colony stimulating factor 1 receptor [Source:HGNC Symbol;Acc:HGNC:2433]	EPHA3	Bilateria	DOWN
ENSOMYG00000008806	-1.06735	0.00288101	CSF1R	colony stimulating factor 1 receptor [Source:HGNC Symbol;Acc:HGNC:2433]	fgfr1a	Bilateria	DOWN
ENSOMYG00000008806	-1.06735	0.00288101	CSF1R	colony stimulating factor 1 receptor [Source:HGNC Symbol;Acc:HGNC:2433]	mst1ra	Bilateria	DOWN
ENSOMYG00000008806	-1.06735	0.00288101	CSF1R	colony stimulating factor 1 receptor [Source:HGNC Symbol;Acc:HGNC:2433]	MST1R	Bilateria	DOWN
ENSOMYG00000008806	-1.06735	0.00288101	CSF1R	colony stimulating factor 1 receptor [Source:HGNC Symbol;Acc:HGNC:2433]	erbb3a	Bilateria	DOWN
ENSOMYG00000008806	-1.06735	0.00288101	CSF1R	colony stimulating factor 1 receptor [Source:HGNC Symbol;Acc:HGNC:2433]	erbb3b	Bilateria	DOWN
ENSOMYG00000008806	-1.06735	0.00288101	CSF1R	colony stimulating factor 1 receptor [Source:HGNC Symbol;Acc:HGNC:2433]	pdgfra	Bilateria	DOWN
ENSOMYG00000008806	-1.06735	0.00288101	CSF1R	colony stimulating factor 1 receptor [Source:HGNC Symbol;Acc:HGNC:2433]	ltk	Bilateria	DOWN
ENSOMYG00000008806	-1.06735	0.00288101	CSF1R	colony stimulating factor 1 receptor [Source:HGNC Symbol;Acc:HGNC:2433]	ntrk1	Bilateria	DOWN
ENSOMYG00000008806	-1.06735	0.00288101	CSF1R	colony stimulating factor 1 receptor [Source:HGNC Symbol;Acc:HGNC:2433]	epha6	Bilateria	DOWN
ENSOMYG00000008806	-1.06735	0.00288101	CSF1R	colony stimulating factor 1 receptor [Source:HGNC Symbol;Acc:HGNC:2433]	kita	Bilateria	DOWN
ENSOMYG00000008806	-1.06735	0.00288101	CSF1R	colony stimulating factor 1 receptor [Source:HGNC Symbol;Acc:HGNC:2433]	NTRK2	Bilateria	DOWN
ENSOMYG00000008806	-1.06735	0.00288101	CSF1R	colony stimulating factor 1 receptor [Source:HGNC Symbol;Acc:HGNC:2433]	ntrk2b	Bilateria	DOWN
ENSOMYG00000008806	-1.06735	0.00288101	CSF1R	colony stimulating factor 1 receptor [Source:HGNC Symbol;Acc:HGNC:2433]	lmtk2	Bilateria	DOWN
ENSOMYG00000008806	-1.06735	0.00288101	CSF1R	colony stimulating factor 1 receptor [Source:HGNC Symbol;Acc:HGNC:2433]	ddr1	Bilateria	DOWN
ENSOMYG00000008806	-1.06735	0.00288101	CSF1R	colony stimulating factor 1 receptor [Source:HGNC Symbol;Acc:HGNC:2433]	kdrl	Bilateria	DOWN
ENSOMYG00000008806	-1.06735	0.00288101	CSF1R	colony stimulating factor 1 receptor [Source:HGNC Symbol;Acc:HGNC:2433]	ERBB4	Bilateria	DOWN
ENSOMYG00000008806	-1.06735	0.00288101	CSF1R	colony stimulating factor 1 receptor [Source:HGNC Symbol;Acc:HGNC:2433]	erbb2	Bilateria	DOWN
ENSOMYG00000008806	-1.06735	0.00288101	CSF1R	colony stimulating factor 1 receptor [Source:HGNC Symbol;Acc:HGNC:2433]	tie1	Bilateria	DOWN
ENSOMYG00000008806	-1.06735	0.00288101	CSF1R	colony stimulating factor 1 receptor [Source:HGNC Symbol;Acc:HGNC:2433]	ephb4a	Bilateria	DOWN
ENSOMYG00000008806	-1.06735	0.00288101	CSF1R	colony stimulating factor 1 receptor [Source:HGNC Symbol;Acc:HGNC:2433]	pdgfrb	Bilateria	DOWN
ENSOMYG00000008806	-1.06735	0.00288101	CSF1R	colony stimulating factor 1 receptor [Source:HGNC Symbol;Acc:HGNC:2433]	epha7	Bilateria	DOWN
ENSOMYG00000008806	-1.06735	0.00288101	CSF1R	colony stimulating factor 1 receptor [Source:HGNC Symbol;Acc:HGNC:2433]	ror1	Bilateria	DOWN
ENSOMYG00000008806	-1.06735	0.00288101	CSF1R	colony stimulating factor 1 receptor [Source:HGNC Symbol;Acc:HGNC:2433]	ror2	Bilateria	DOWN
ENSOMYG00000008806	-1.06735	0.00288101	CSF1R	colony stimulating factor 1 receptor [Source:HGNC Symbol;Acc:HGNC:2433]	flt3	Bilateria	DOWN
ENSOMYG00000008806	-1.06735	0.00288101	CSF1R	colony stimulating factor 1 receptor [Source:HGNC Symbol;Acc:HGNC:2433]	fgfr4	Bilateria	DOWN
ENSOMYG00000008806	-1.06735	0.00288101	CSF1R	colony stimulating factor 1 receptor [Source:HGNC Symbol;Acc:HGNC:2433]	epha2a	Bilateria	DOWN
ENSOMYG00000008806	-1.06735	0.00288101	CSF1R	colony stimulating factor 1 receptor [Source:HGNC Symbol;Acc:HGNC:2433]	epha2b	Bilateria	DOWN
ENSOMYG00000008806	-1.06735	0.00288101	CSF1R	colony stimulating factor 1 receptor [Source:HGNC Symbol;Acc:HGNC:2433]	ephb2b	Bilateria	DOWN
ENSOMYG00000008806	-1.06735	0.00288101	CSF1R	colony stimulating factor 1 receptor [Source:HGNC Symbol;Acc:HGNC:2433]	flt4	Bilateria	DOWN
ENSOMYG00000008806	-1.06735	0.00288101	CSF1R	colony stimulating factor 1 receptor [Source:HGNC Symbol;Acc:HGNC:2433]	kdr	Bilateria	DOWN
ENSOMYG00000008806	-1.06735	0.00288101	CSF1R	colony stimulating factor 1 receptor [Source:HGNC Symbol;Acc:HGNC:2433]	egfra	Bilateria	DOWN
ENSOMYG00000008806	-1.06735	0.00288101	CSF1R	colony stimulating factor 1 receptor [Source:HGNC Symbol;Acc:HGNC:2433]	FGFR2	Bilateria	DOWN
ENSOMYG00000008806	-1.06735	0.00288101	CSF1R	colony stimulating factor 1 receptor [Source:HGNC Symbol;Acc:HGNC:2433]	EPHA4	Bilateria	DOWN
ENSOMYG00000008806	-1.06735	0.00288101	CSF1R	colony stimulating factor 1 receptor [Source:HGNC Symbol;Acc:HGNC:2433]	met	Bilateria	DOWN
ENSOMYG00000008806	-1.06735	0.00288101	CSF1R	colony stimulating factor 1 receptor [Source:HGNC Symbol;Acc:HGNC:2433]	insra	Bilateria	DOWN
ENSOMYG00000008806	-1.06735	0.00288101	CSF1R	colony stimulating factor 1 receptor [Source:HGNC Symbol;Acc:HGNC:2433]	insrb	Bilateria	DOWN
ENSOMYG00000008806	-1.06735	0.00288101	CSF1R	colony stimulating factor 1 receptor [Source:HGNC Symbol;Acc:HGNC:2433]	ret	Bilateria	DOWN
ENSOMYG00000008806	-1.06735	0.00288101	CSF1R	colony stimulating factor 1 receptor [Source:HGNC Symbol;Acc:HGNC:2433]	tyro3	Bilateria	DOWN
ENSOMYG00000008806	-1.06735	0.00288101	CSF1R	colony stimulating factor 1 receptor [Source:HGNC Symbol;Acc:HGNC:2433]	mertka	Bilateria	DOWN
ENSOMYG00000008806	-1.06735	0.00288101	CSF1R	colony stimulating factor 1 receptor [Source:HGNC Symbol;Acc:HGNC:2433]	fgfr3	Bilateria	DOWN
ENSOMYG00000008806	-1.06735	0.00288101	CSF1R	colony stimulating factor 1 receptor [Source:HGNC Symbol;Acc:HGNC:2433]	ntrk3a	Bilateria	DOWN
ENSOMYG00000008806	-1.06735	0.00288101	CSF1R	colony stimulating factor 1 receptor [Source:HGNC Symbol;Acc:HGNC:2433]	ntrk3b	Bilateria	DOWN
ENSOMYG00000008806	-1.06735	0.00288101	CSF1R	colony stimulating factor 1 receptor [Source:HGNC Symbol;Acc:HGNC:2433]	FLT1	Bilateria	DOWN
ENSOMYG00000008806	-1.06735	0.00288101	CSF1R	colony stimulating factor 1 receptor [Source:HGNC Symbol;Acc:HGNC:2433]	igf1ra	Bilateria	DOWN
ENSOMYG00000008806	-1.06735	0.00288101	CSF1R	colony stimulating factor 1 receptor [Source:HGNC Symbol;Acc:HGNC:2433]	igf1rb	Bilateria	DOWN
ENSOMYG00000008832	1.77549	0.0313901	mknk2a	MAPK interacting serine/threonine kinase 2a [Source:ZFIN;Acc:ZDB-GENE-030131-6099]	mknk2b	Clupeocephala	UP
ENSOMYG00000008832	1.77549	0.0313901	mknk2a	MAPK interacting serine/threonine kinase 2a [Source:ZFIN;Acc:ZDB-GENE-030131-6099]	mknk1	Vertebrata	UP
ENSOMYG00000008832	1.77549	0.0313901	mknk2a	MAPK interacting serine/threonine kinase 2a [Source:ZFIN;Acc:ZDB-GENE-030131-6099]	NA	Opisthokonta	UP
ENSOMYG00000008832	1.77549	0.0313901	mknk2a	MAPK interacting serine/threonine kinase 2a [Source:ZFIN;Acc:ZDB-GENE-030131-6099]	mapkapk2b	Opisthokonta	UP
ENSOMYG00000008832	1.77549	0.0313901	mknk2a	MAPK interacting serine/threonine kinase 2a [Source:ZFIN;Acc:ZDB-GENE-030131-6099]	si:ch73-60h1.1	Opisthokonta	UP
ENSOMYG00000008832	1.77549	0.0313901	mknk2a	MAPK interacting serine/threonine kinase 2a [Source:ZFIN;Acc:ZDB-GENE-030131-6099]	mapkapk3	Opisthokonta	UP
ENSOMYG00000008832	1.77549	0.0313901	mknk2a	MAPK interacting serine/threonine kinase 2a [Source:ZFIN;Acc:ZDB-GENE-030131-6099]	camk4	Opisthokonta	UP
ENSOMYG00000008992	1.99594	0.00777843	dnajc3b	DnaJ (Hsp40) homolog, subfamily C, member 3b [Source:ZFIN;Acc:ZDB-GENE-000831-4]	NA	Salmoninae	UP
ENSOMYG00000008992	1.99594	0.00777843	dnajc3b	DnaJ (Hsp40) homolog, subfamily C, member 3b [Source:ZFIN;Acc:ZDB-GENE-000831-4]	dnajc3b	Salmoninae	UP
ENSOMYG00000008992	1.99594	0.00777843	dnajc3b	DnaJ (Hsp40) homolog, subfamily C, member 3b [Source:ZFIN;Acc:ZDB-GENE-000831-4]	dnajc3a	Opisthokonta	UP
ENSOMYG00000008992	1.99594	0.00777843	dnajc3b	DnaJ (Hsp40) homolog, subfamily C, member 3b [Source:ZFIN;Acc:ZDB-GENE-000831-4]	NA	Opisthokonta	UP
ENSOMYG00000008992	1.99594	0.00777843	dnajc3b	DnaJ (Hsp40) homolog, subfamily C, member 3b [Source:ZFIN;Acc:ZDB-GENE-000831-4]	dnajc25	Opisthokonta	UP
ENSOMYG00000008992	1.99594	0.00777843	dnajc3b	DnaJ (Hsp40) homolog, subfamily C, member 3b [Source:ZFIN;Acc:ZDB-GENE-000831-4]	dnajc21	Opisthokonta	UP
ENSOMYG00000008992	1.99594	0.00777843	dnajc3b	DnaJ (Hsp40) homolog, subfamily C, member 3b [Source:ZFIN;Acc:ZDB-GENE-000831-4]	dnajc17	Opisthokonta	UP
ENSOMYG00000008992	1.99594	0.00777843	dnajc3b	DnaJ (Hsp40) homolog, subfamily C, member 3b [Source:ZFIN;Acc:ZDB-GENE-000831-4]	dnajc16l	Opisthokonta	UP
ENSOMYG00000008992	1.99594	0.00777843	dnajc3b	DnaJ (Hsp40) homolog, subfamily C, member 3b [Source:ZFIN;Acc:ZDB-GENE-000831-4]	dnajc5ab	Opisthokonta	UP
ENSOMYG00000008992	1.99594	0.00777843	dnajc3b	DnaJ (Hsp40) homolog, subfamily C, member 3b [Source:ZFIN;Acc:ZDB-GENE-000831-4]	dnajc5aa	Opisthokonta	UP
ENSOMYG00000008992	1.99594	0.00777843	dnajc3b	DnaJ (Hsp40) homolog, subfamily C, member 3b [Source:ZFIN;Acc:ZDB-GENE-000831-4]	dnajc5ga	Opisthokonta	UP
ENSOMYG00000008992	1.99594	0.00777843	dnajc3b	DnaJ (Hsp40) homolog, subfamily C, member 3b [Source:ZFIN;Acc:ZDB-GENE-000831-4]	dnajc5gb	Opisthokonta	UP
ENSOMYG00000008992	1.99594	0.00777843	dnajc3b	DnaJ (Hsp40) homolog, subfamily C, member 3b [Source:ZFIN;Acc:ZDB-GENE-000831-4]	DNAJC2	Opisthokonta	UP
ENSOMYG00000008992	1.99594	0.00777843	dnajc3b	DnaJ (Hsp40) homolog, subfamily C, member 3b [Source:ZFIN;Acc:ZDB-GENE-000831-4]	dnajc4	Opisthokonta	UP
ENSOMYG00000008992	1.99594	0.00777843	dnajc3b	DnaJ (Hsp40) homolog, subfamily C, member 3b [Source:ZFIN;Acc:ZDB-GENE-000831-4]	dnajc12	Opisthokonta	UP
ENSOMYG00000008992	1.99594	0.00777843	dnajc3b	DnaJ (Hsp40) homolog, subfamily C, member 3b [Source:ZFIN;Acc:ZDB-GENE-000831-4]	dnajc7	Opisthokonta	UP
ENSOMYG00000008992	1.99594	0.00777843	dnajc3b	DnaJ (Hsp40) homolog, subfamily C, member 3b [Source:ZFIN;Acc:ZDB-GENE-000831-4]	dnajc10	Opisthokonta	UP
ENSOMYG00000008992	1.99594	0.00777843	dnajc3b	DnaJ (Hsp40) homolog, subfamily C, member 3b [Source:ZFIN;Acc:ZDB-GENE-000831-4]	DNAJC5B	Opisthokonta	UP
ENSOMYG00000008992	1.99594	0.00777843	dnajc3b	DnaJ (Hsp40) homolog, subfamily C, member 3b [Source:ZFIN;Acc:ZDB-GENE-000831-4]	dnajc5b	Opisthokonta	UP
ENSOMYG00000008992	1.99594	0.00777843	dnajc3b	DnaJ (Hsp40) homolog, subfamily C, member 3b [Source:ZFIN;Acc:ZDB-GENE-000831-4]	dnajc24	Opisthokonta	UP
ENSOMYG00000008992	1.99594	0.00777843	dnajc3b	DnaJ (Hsp40) homolog, subfamily C, member 3b [Source:ZFIN;Acc:ZDB-GENE-000831-4]	dnajc11a	Opisthokonta	UP
ENSOMYG00000008992	1.99594	0.00777843	dnajc3b	DnaJ (Hsp40) homolog, subfamily C, member 3b [Source:ZFIN;Acc:ZDB-GENE-000831-4]	dnajc11b	Opisthokonta	UP
ENSOMYG00000009253	-1.26832	1.2917e-06	NA	NA	NA	Salmoninae	DOWN
ENSOMYG00000009253	-1.26832	1.2917e-06	NA	NA	NA	Osteoglossocephalai	DOWN
ENSOMYG00000009253	-1.26832	1.2917e-06	NA	NA	NA	Vertebrata	DOWN
ENSOMYG00000009255	1.15475	0.0325122	NA	NA	NA	Salmoninae	UP
ENSOMYG00000009255	1.15475	0.0325122	NA	NA	NA	Euteleosteomorpha	UP
ENSOMYG00000009255	1.15475	0.0325122	NA	NA	NA	Osteoglossocephalai	UP
ENSOMYG00000009255	1.15475	0.0325122	NA	NA	NA	Neopterygii	UP
ENSOMYG00000009255	1.15475	0.0325122	NA	NA	NA	Euteleostomi	UP
ENSOMYG00000009255	1.15475	0.0325122	NA	NA	NA	Bilateria	UP
ENSOMYG00000009255	1.15475	0.0325122	NA	NA	si:dkeyp-113d7.1	Bilateria	UP
ENSOMYG00000009255	1.15475	0.0325122	NA	NA	zg57	Bilateria	UP
ENSOMYG00000009255	1.15475	0.0325122	NA	NA	znf16l	Bilateria	UP
ENSOMYG00000009255	1.15475	0.0325122	NA	NA	si:ch1073-224n8.1	Bilateria	UP
ENSOMYG00000009390	1.23982	0.0319179	pole4	polymerase (DNA-directed), epsilon 4, accessory subunit [Source:ZFIN;Acc:ZDB-GENE-050522-309]	pole4	Salmoninae	UP
ENSOMYG00000009390	1.23982	0.0319179	pole4	polymerase (DNA-directed), epsilon 4, accessory subunit [Source:ZFIN;Acc:ZDB-GENE-050522-309]	NA	Opisthokonta	UP
ENSOMYG00000009390	1.23982	0.0319179	pole4	polymerase (DNA-directed), epsilon 4, accessory subunit [Source:ZFIN;Acc:ZDB-GENE-050522-309]	chrc1	Opisthokonta	UP
ENSOMYG00000009390	1.23982	0.0319179	pole4	polymerase (DNA-directed), epsilon 4, accessory subunit [Source:ZFIN;Acc:ZDB-GENE-050522-309]	chrac1	Opisthokonta	UP
ENSOMYG00000009390	1.23982	0.0319179	pole4	polymerase (DNA-directed), epsilon 4, accessory subunit [Source:ZFIN;Acc:ZDB-GENE-050522-309]	drap1	Opisthokonta	UP
ENSOMYG00000009450	-1.50968	0.00365617	cenpi	centromere protein I [Source:ZFIN;Acc:ZDB-GENE-060810-127]	cenpi	Salmoninae	DOWN
ENSOMYG00000009461	-1.36711	0.00152649	NA	neuroepithelial cell transforming 1 [Source:HGNC Symbol;Acc:HGNC:14592]	net1	Clupeocephala	DOWN
ENSOMYG00000009461	-1.36711	0.00152649	NA	neuroepithelial cell transforming 1 [Source:HGNC Symbol;Acc:HGNC:14592]	NA	Clupeocephala	DOWN
ENSOMYG00000009461	-1.36711	0.00152649	NA	neuroepithelial cell transforming 1 [Source:HGNC Symbol;Acc:HGNC:14592]	plekhg6	Bilateria	DOWN
ENSOMYG00000009461	-1.36711	0.00152649	NA	neuroepithelial cell transforming 1 [Source:HGNC Symbol;Acc:HGNC:14592]	arhgef1b	Bilateria	DOWN
ENSOMYG00000009461	-1.36711	0.00152649	NA	neuroepithelial cell transforming 1 [Source:HGNC Symbol;Acc:HGNC:14592]	NA	Bilateria	DOWN
ENSOMYG00000009461	-1.36711	0.00152649	NA	neuroepithelial cell transforming 1 [Source:HGNC Symbol;Acc:HGNC:14592]	arhgef28a	Bilateria	DOWN
ENSOMYG00000009461	-1.36711	0.00152649	NA	neuroepithelial cell transforming 1 [Source:HGNC Symbol;Acc:HGNC:14592]	ARHGEF3	Bilateria	DOWN
ENSOMYG00000009461	-1.36711	0.00152649	NA	neuroepithelial cell transforming 1 [Source:HGNC Symbol;Acc:HGNC:14592]	arhgef1a	Bilateria	DOWN
ENSOMYG00000009461	-1.36711	0.00152649	NA	neuroepithelial cell transforming 1 [Source:HGNC Symbol;Acc:HGNC:14592]	arhgef3l	Bilateria	DOWN
ENSOMYG00000009461	-1.36711	0.00152649	NA	neuroepithelial cell transforming 1 [Source:HGNC Symbol;Acc:HGNC:14592]	arhgef12a	Bilateria	DOWN
ENSOMYG00000009461	-1.36711	0.00152649	NA	neuroepithelial cell transforming 1 [Source:HGNC Symbol;Acc:HGNC:14592]	ARHGEF12	Bilateria	DOWN
ENSOMYG00000009461	-1.36711	0.00152649	NA	neuroepithelial cell transforming 1 [Source:HGNC Symbol;Acc:HGNC:14592]	arhgef18a	Bilateria	DOWN
ENSOMYG00000009461	-1.36711	0.00152649	NA	neuroepithelial cell transforming 1 [Source:HGNC Symbol;Acc:HGNC:14592]	arhgef18b	Bilateria	DOWN
ENSOMYG00000009689	-1.20259	0.018417	NA	NA	NA	Vertebrata	DOWN
ENSOMYG00000009689	-1.20259	0.018417	NA	NA	PDCD1LG2	Vertebrata	DOWN
ENSOMYG00000009689	-1.20259	0.018417	NA	NA	zgc:195001	Vertebrata	DOWN
ENSOMYG00000009689	-1.20259	0.018417	NA	NA	RNF152	Vertebrata	DOWN
ENSOMYG00000009689	-1.20259	0.018417	NA	NA	si:dkey-219e21.4	Vertebrata	DOWN
ENSOMYG00000009689	-1.20259	0.018417	NA	NA	spryd4	Vertebrata	DOWN
ENSOMYG00000009689	-1.20259	0.018417	NA	NA	NA	Salmoninae	DOWN
ENSOMYG00000009699	1.49548	0.00187922	NA	NA	hspa12a	Bilateria	UP
ENSOMYG00000009699	1.49548	0.00187922	NA	NA	NA	Bilateria	UP
ENSOMYG00000009912	1.22957	0.0275746	pdcd4b	programmed cell death 4b [Source:ZFIN;Acc:ZDB-GENE-030131-9847]	pdcd4b	Oncorhynchus mykiss	UP
ENSOMYG00000009912	1.22957	0.0275746	pdcd4b	programmed cell death 4b [Source:ZFIN;Acc:ZDB-GENE-030131-9847]	NA	Vertebrata	UP
ENSOMYG00000010238	-1.27096	0.00469942	aspm	assembly factor for spindle microtubules [Source:ZFIN;Acc:ZDB-GENE-050208-620]	NA	Bilateria	DOWN
ENSOMYG00000010238	-1.27096	0.00469942	aspm	assembly factor for spindle microtubules [Source:ZFIN;Acc:ZDB-GENE-050208-620]	GAS2	Bilateria	DOWN
ENSOMYG00000010238	-1.27096	0.00469942	aspm	assembly factor for spindle microtubules [Source:ZFIN;Acc:ZDB-GENE-050208-620]	gas2b	Bilateria	DOWN
ENSOMYG00000010238	-1.27096	0.00469942	aspm	assembly factor for spindle microtubules [Source:ZFIN;Acc:ZDB-GENE-050208-620]	gas2l1	Bilateria	DOWN
ENSOMYG00000010238	-1.27096	0.00469942	aspm	assembly factor for spindle microtubules [Source:ZFIN;Acc:ZDB-GENE-050208-620]	micall1b.2	Bilateria	DOWN
ENSOMYG00000010238	-1.27096	0.00469942	aspm	assembly factor for spindle microtubules [Source:ZFIN;Acc:ZDB-GENE-050208-620]	micall2a	Bilateria	DOWN
ENSOMYG00000010238	-1.27096	0.00469942	aspm	assembly factor for spindle microtubules [Source:ZFIN;Acc:ZDB-GENE-050208-620]	ehbp1	Bilateria	DOWN
ENSOMYG00000010268	-1.1122	0.000632226	slc6a22.1	solute carrier family 6 member 22, tandem duplicate 1 [Source:ZFIN;Acc:ZDB-GENE-030616-629]	slc6a22.1	Salmoninae	DOWN
ENSOMYG00000010268	-1.1122	0.000632226	slc6a22.1	solute carrier family 6 member 22, tandem duplicate 1 [Source:ZFIN;Acc:ZDB-GENE-030616-629]	NA	Neopterygii	DOWN
ENSOMYG00000010268	-1.1122	0.000632226	slc6a22.1	solute carrier family 6 member 22, tandem duplicate 1 [Source:ZFIN;Acc:ZDB-GENE-030616-629]	slc6a11a	Neopterygii	DOWN
ENSOMYG00000010268	-1.1122	0.000632226	slc6a22.1	solute carrier family 6 member 22, tandem duplicate 1 [Source:ZFIN;Acc:ZDB-GENE-030616-629]	si:ch211-132b12.6	Bilateria	DOWN
ENSOMYG00000010268	-1.1122	0.000632226	slc6a22.1	solute carrier family 6 member 22, tandem duplicate 1 [Source:ZFIN;Acc:ZDB-GENE-030616-629]	NA	Bilateria	DOWN
ENSOMYG00000010268	-1.1122	0.000632226	slc6a22.1	solute carrier family 6 member 22, tandem duplicate 1 [Source:ZFIN;Acc:ZDB-GENE-030616-629]	SLC6A20	Bilateria	DOWN
ENSOMYG00000010268	-1.1122	0.000632226	slc6a22.1	solute carrier family 6 member 22, tandem duplicate 1 [Source:ZFIN;Acc:ZDB-GENE-030616-629]	si:ch211-117c9.5	Bilateria	DOWN
ENSOMYG00000010268	-1.1122	0.000632226	slc6a22.1	solute carrier family 6 member 22, tandem duplicate 1 [Source:ZFIN;Acc:ZDB-GENE-030616-629]	slc6a19b	Bilateria	DOWN
ENSOMYG00000010268	-1.1122	0.000632226	slc6a22.1	solute carrier family 6 member 22, tandem duplicate 1 [Source:ZFIN;Acc:ZDB-GENE-030616-629]	slc6a19a.2	Bilateria	DOWN
ENSOMYG00000010268	-1.1122	0.000632226	slc6a22.1	solute carrier family 6 member 22, tandem duplicate 1 [Source:ZFIN;Acc:ZDB-GENE-030616-629]	slc6a8	Bilateria	DOWN
ENSOMYG00000010268	-1.1122	0.000632226	slc6a22.1	solute carrier family 6 member 22, tandem duplicate 1 [Source:ZFIN;Acc:ZDB-GENE-030616-629]	slc6a22.2	Bilateria	DOWN
ENSOMYG00000010268	-1.1122	0.000632226	slc6a22.1	solute carrier family 6 member 22, tandem duplicate 1 [Source:ZFIN;Acc:ZDB-GENE-030616-629]	slc6a14	Bilateria	DOWN
ENSOMYG00000010268	-1.1122	0.000632226	slc6a22.1	solute carrier family 6 member 22, tandem duplicate 1 [Source:ZFIN;Acc:ZDB-GENE-030616-629]	slc6a7	Bilateria	DOWN
ENSOMYG00000010268	-1.1122	0.000632226	slc6a22.1	solute carrier family 6 member 22, tandem duplicate 1 [Source:ZFIN;Acc:ZDB-GENE-030616-629]	slc6a1a	Bilateria	DOWN
ENSOMYG00000010268	-1.1122	0.000632226	slc6a22.1	solute carrier family 6 member 22, tandem duplicate 1 [Source:ZFIN;Acc:ZDB-GENE-030616-629]	slc6a6b	Bilateria	DOWN
ENSOMYG00000010268	-1.1122	0.000632226	slc6a22.1	solute carrier family 6 member 22, tandem duplicate 1 [Source:ZFIN;Acc:ZDB-GENE-030616-629]	slc6a3	Bilateria	DOWN
ENSOMYG00000010268	-1.1122	0.000632226	slc6a22.1	solute carrier family 6 member 22, tandem duplicate 1 [Source:ZFIN;Acc:ZDB-GENE-030616-629]	slc6a9	Bilateria	DOWN
ENSOMYG00000010268	-1.1122	0.000632226	slc6a22.1	solute carrier family 6 member 22, tandem duplicate 1 [Source:ZFIN;Acc:ZDB-GENE-030616-629]	slc6a4a	Bilateria	DOWN
ENSOMYG00000010268	-1.1122	0.000632226	slc6a22.1	solute carrier family 6 member 22, tandem duplicate 1 [Source:ZFIN;Acc:ZDB-GENE-030616-629]	slc6a4b	Bilateria	DOWN
ENSOMYG00000010268	-1.1122	0.000632226	slc6a22.1	solute carrier family 6 member 22, tandem duplicate 1 [Source:ZFIN;Acc:ZDB-GENE-030616-629]	si:ch211-225b11.1	Bilateria	DOWN
ENSOMYG00000010268	-1.1122	0.000632226	slc6a22.1	solute carrier family 6 member 22, tandem duplicate 1 [Source:ZFIN;Acc:ZDB-GENE-030616-629]	slc6a17	Bilateria	DOWN
ENSOMYG00000010268	-1.1122	0.000632226	slc6a22.1	solute carrier family 6 member 22, tandem duplicate 1 [Source:ZFIN;Acc:ZDB-GENE-030616-629]	slc6a18	Bilateria	DOWN
ENSOMYG00000010268	-1.1122	0.000632226	slc6a22.1	solute carrier family 6 member 22, tandem duplicate 1 [Source:ZFIN;Acc:ZDB-GENE-030616-629]	slc6a15	Bilateria	DOWN
ENSOMYG00000010296	-1.52463	0.000469065	exo1	exonuclease 1 [Source:ZFIN;Acc:ZDB-GENE-040426-2828]	ercc5	Opisthokonta	DOWN
ENSOMYG00000010296	-1.52463	0.000469065	exo1	exonuclease 1 [Source:ZFIN;Acc:ZDB-GENE-040426-2828]	NA	Opisthokonta	DOWN
ENSOMYG00000010384	-1.90113	0.00992525	gins4	GINS complex subunit 4 (Sld5 homolog) [Source:ZFIN;Acc:ZDB-GENE-040801-59]	gins4	Salmoninae	DOWN
ENSOMYG00000010447	8.13459	0.0412752	hspa1b	heat shock protein family A (Hsp70) member 1B [Source:ZFIN;Acc:ZDB-GENE-060503-867]	NA	Opisthokonta	UP
ENSOMYG00000010447	8.13459	0.0412752	hspa1b	heat shock protein family A (Hsp70) member 1B [Source:ZFIN;Acc:ZDB-GENE-060503-867]	hspa4l	Opisthokonta	UP
ENSOMYG00000010447	8.13459	0.0412752	hspa1b	heat shock protein family A (Hsp70) member 1B [Source:ZFIN;Acc:ZDB-GENE-060503-867]	hspa14	Opisthokonta	UP
ENSOMYG00000010447	8.13459	0.0412752	hspa1b	heat shock protein family A (Hsp70) member 1B [Source:ZFIN;Acc:ZDB-GENE-060503-867]	hyou1	Opisthokonta	UP
ENSOMYG00000010447	8.13459	0.0412752	hspa1b	heat shock protein family A (Hsp70) member 1B [Source:ZFIN;Acc:ZDB-GENE-060503-867]	hspa4a	Opisthokonta	UP
ENSOMYG00000010447	8.13459	0.0412752	hspa1b	heat shock protein family A (Hsp70) member 1B [Source:ZFIN;Acc:ZDB-GENE-060503-867]	hspa4b	Opisthokonta	UP
ENSOMYG00000010447	8.13459	0.0412752	hspa1b	heat shock protein family A (Hsp70) member 1B [Source:ZFIN;Acc:ZDB-GENE-060503-867]	hsc70	Opisthokonta	UP
ENSOMYG00000010447	8.13459	0.0412752	hspa1b	heat shock protein family A (Hsp70) member 1B [Source:ZFIN;Acc:ZDB-GENE-060503-867]	HSPA8	Opisthokonta	UP
ENSOMYG00000010447	8.13459	0.0412752	hspa1b	heat shock protein family A (Hsp70) member 1B [Source:ZFIN;Acc:ZDB-GENE-060503-867]	hspa8	Opisthokonta	UP
ENSOMYG00000010447	8.13459	0.0412752	hspa1b	heat shock protein family A (Hsp70) member 1B [Source:ZFIN;Acc:ZDB-GENE-060503-867]	hspa13	Opisthokonta	UP
ENSOMYG00000010447	8.13459	0.0412752	hspa1b	heat shock protein family A (Hsp70) member 1B [Source:ZFIN;Acc:ZDB-GENE-060503-867]	hsp70a	Actinopterygii	UP
ENSOMYG00000010447	8.13459	0.0412752	hspa1b	heat shock protein family A (Hsp70) member 1B [Source:ZFIN;Acc:ZDB-GENE-060503-867]	NA	Actinopterygii	UP
ENSOMYG00000010447	8.13459	0.0412752	hspa1b	heat shock protein family A (Hsp70) member 1B [Source:ZFIN;Acc:ZDB-GENE-060503-867]	hsp70b	Actinopterygii	UP
ENSOMYG00000010560	-1.3195	0.000606159	mtf2	metal response element binding transcription factor 2 [Source:ZFIN;Acc:ZDB-GENE-060512-94]	mtf2	Protacanthopterygii	DOWN
ENSOMYG00000010560	-1.3195	0.000606159	mtf2	metal response element binding transcription factor 2 [Source:ZFIN;Acc:ZDB-GENE-060512-94]	phf19	Gnathostomata	DOWN
ENSOMYG00000010560	-1.3195	0.000606159	mtf2	metal response element binding transcription factor 2 [Source:ZFIN;Acc:ZDB-GENE-060512-94]	NA	Gnathostomata	DOWN
ENSOMYG00000010644	1.02304	0.00912985	NA	NA	NA	Salmoninae	UP
ENSOMYG00000010644	1.02304	0.00912985	NA	NA	socs7	Clupeocephala	UP
ENSOMYG00000010644	1.02304	0.00912985	NA	NA	cish	Bilateria	UP
ENSOMYG00000010644	1.02304	0.00912985	NA	NA	NA	Bilateria	UP
ENSOMYG00000010644	1.02304	0.00912985	NA	NA	cisha	Bilateria	UP
ENSOMYG00000010644	1.02304	0.00912985	NA	NA	socs6	Bilateria	UP
ENSOMYG00000010644	1.02304	0.00912985	NA	NA	socs6b	Bilateria	UP
ENSOMYG00000010644	1.02304	0.00912985	NA	NA	socs6a	Bilateria	UP
ENSOMYG00000010644	1.02304	0.00912985	NA	NA	socs3b	Bilateria	UP
ENSOMYG00000010644	1.02304	0.00912985	NA	NA	socs3a	Bilateria	UP
ENSOMYG00000010644	1.02304	0.00912985	NA	NA	socs3	Bilateria	UP
ENSOMYG00000010644	1.02304	0.00912985	NA	NA	socs4	Bilateria	UP
ENSOMYG00000010644	1.02304	0.00912985	NA	NA	socs1	Bilateria	UP
ENSOMYG00000010644	1.02304	0.00912985	NA	NA	socs1a	Bilateria	UP
ENSOMYG00000010644	1.02304	0.00912985	NA	NA	socs5b	Bilateria	UP
ENSOMYG00000010644	1.02304	0.00912985	NA	NA	socs1b	Bilateria	UP
ENSOMYG00000010644	1.02304	0.00912985	NA	NA	socs2	Bilateria	UP
ENSOMYG00000010790	2.40895	0.00134717	NA	pregnancy up-regulated nonubiquitous CaM kinase [Source:ZFIN;Acc:ZDB-GENE-081105-127]	camk1da	Vertebrata	UP
ENSOMYG00000010790	2.40895	0.00134717	NA	pregnancy up-regulated nonubiquitous CaM kinase [Source:ZFIN;Acc:ZDB-GENE-081105-127]	camk1db	Vertebrata	UP
ENSOMYG00000010790	2.40895	0.00134717	NA	pregnancy up-regulated nonubiquitous CaM kinase [Source:ZFIN;Acc:ZDB-GENE-081105-127]	NA	Vertebrata	UP
ENSOMYG00000010790	2.40895	0.00134717	NA	pregnancy up-regulated nonubiquitous CaM kinase [Source:ZFIN;Acc:ZDB-GENE-081105-127]	NA	Opisthokonta	UP
ENSOMYG00000010790	2.40895	0.00134717	NA	pregnancy up-regulated nonubiquitous CaM kinase [Source:ZFIN;Acc:ZDB-GENE-081105-127]	DCLK1	Opisthokonta	UP
ENSOMYG00000010790	2.40895	0.00134717	NA	pregnancy up-regulated nonubiquitous CaM kinase [Source:ZFIN;Acc:ZDB-GENE-081105-127]	dclk1a	Opisthokonta	UP
ENSOMYG00000010790	2.40895	0.00134717	NA	pregnancy up-regulated nonubiquitous CaM kinase [Source:ZFIN;Acc:ZDB-GENE-081105-127]	PHKG1	Opisthokonta	UP
ENSOMYG00000010790	2.40895	0.00134717	NA	pregnancy up-regulated nonubiquitous CaM kinase [Source:ZFIN;Acc:ZDB-GENE-081105-127]	camkk1a	Opisthokonta	UP
ENSOMYG00000010790	2.40895	0.00134717	NA	pregnancy up-regulated nonubiquitous CaM kinase [Source:ZFIN;Acc:ZDB-GENE-081105-127]	stk33	Opisthokonta	UP
ENSOMYG00000010790	2.40895	0.00134717	NA	pregnancy up-regulated nonubiquitous CaM kinase [Source:ZFIN;Acc:ZDB-GENE-081105-127]	camkva	Opisthokonta	UP
ENSOMYG00000010790	2.40895	0.00134717	NA	pregnancy up-regulated nonubiquitous CaM kinase [Source:ZFIN;Acc:ZDB-GENE-081105-127]	camkvb	Opisthokonta	UP
ENSOMYG00000010790	2.40895	0.00134717	NA	pregnancy up-regulated nonubiquitous CaM kinase [Source:ZFIN;Acc:ZDB-GENE-081105-127]	mylk4b	Opisthokonta	UP
ENSOMYG00000010790	2.40895	0.00134717	NA	pregnancy up-regulated nonubiquitous CaM kinase [Source:ZFIN;Acc:ZDB-GENE-081105-127]	MYLK4	Opisthokonta	UP
ENSOMYG00000010790	2.40895	0.00134717	NA	pregnancy up-regulated nonubiquitous CaM kinase [Source:ZFIN;Acc:ZDB-GENE-081105-127]	mylk3	Opisthokonta	UP
ENSOMYG00000010790	2.40895	0.00134717	NA	pregnancy up-regulated nonubiquitous CaM kinase [Source:ZFIN;Acc:ZDB-GENE-081105-127]	camk1ga	Opisthokonta	UP
ENSOMYG00000010790	2.40895	0.00134717	NA	pregnancy up-regulated nonubiquitous CaM kinase [Source:ZFIN;Acc:ZDB-GENE-081105-127]	camk1gb	Opisthokonta	UP
ENSOMYG00000010790	2.40895	0.00134717	NA	pregnancy up-regulated nonubiquitous CaM kinase [Source:ZFIN;Acc:ZDB-GENE-081105-127]	si:ch211-27e6.1	Opisthokonta	UP
ENSOMYG00000010790	2.40895	0.00134717	NA	pregnancy up-regulated nonubiquitous CaM kinase [Source:ZFIN;Acc:ZDB-GENE-081105-127]	pskh1	Opisthokonta	UP
ENSOMYG00000010790	2.40895	0.00134717	NA	pregnancy up-regulated nonubiquitous CaM kinase [Source:ZFIN;Acc:ZDB-GENE-081105-127]	camk1b	Opisthokonta	UP
ENSOMYG00000010790	2.40895	0.00134717	NA	pregnancy up-regulated nonubiquitous CaM kinase [Source:ZFIN;Acc:ZDB-GENE-081105-127]	camk1a	Opisthokonta	UP
ENSOMYG00000010790	2.40895	0.00134717	NA	pregnancy up-regulated nonubiquitous CaM kinase [Source:ZFIN;Acc:ZDB-GENE-081105-127]	STK11	Opisthokonta	UP
ENSOMYG00000010903	1.77692	0.00384868	acsbg2	acyl-CoA synthetase bubblegum family member 2 [Source:ZFIN;Acc:ZDB-GENE-030131-7099]	acsbg2	Salmoninae	UP
ENSOMYG00000010903	1.77692	0.00384868	acsbg2	acyl-CoA synthetase bubblegum family member 2 [Source:ZFIN;Acc:ZDB-GENE-030131-7099]	NA	Gnathostomata	UP
ENSOMYG00000010903	1.77692	0.00384868	acsbg2	acyl-CoA synthetase bubblegum family member 2 [Source:ZFIN;Acc:ZDB-GENE-030131-7099]	slc27a4	Opisthokonta	UP
ENSOMYG00000010903	1.77692	0.00384868	acsbg2	acyl-CoA synthetase bubblegum family member 2 [Source:ZFIN;Acc:ZDB-GENE-030131-7099]	slc27a6	Opisthokonta	UP
ENSOMYG00000010903	1.77692	0.00384868	acsbg2	acyl-CoA synthetase bubblegum family member 2 [Source:ZFIN;Acc:ZDB-GENE-030131-7099]	acsl5	Opisthokonta	UP
ENSOMYG00000010903	1.77692	0.00384868	acsbg2	acyl-CoA synthetase bubblegum family member 2 [Source:ZFIN;Acc:ZDB-GENE-030131-7099]	NA	Opisthokonta	UP
ENSOMYG00000010903	1.77692	0.00384868	acsbg2	acyl-CoA synthetase bubblegum family member 2 [Source:ZFIN;Acc:ZDB-GENE-030131-7099]	acsl3a	Opisthokonta	UP
ENSOMYG00000010903	1.77692	0.00384868	acsbg2	acyl-CoA synthetase bubblegum family member 2 [Source:ZFIN;Acc:ZDB-GENE-030131-7099]	acsl3b	Opisthokonta	UP
ENSOMYG00000010903	1.77692	0.00384868	acsbg2	acyl-CoA synthetase bubblegum family member 2 [Source:ZFIN;Acc:ZDB-GENE-030131-7099]	slc27a2a	Opisthokonta	UP
ENSOMYG00000010903	1.77692	0.00384868	acsbg2	acyl-CoA synthetase bubblegum family member 2 [Source:ZFIN;Acc:ZDB-GENE-030131-7099]	slc27a1a	Opisthokonta	UP
ENSOMYG00000010903	1.77692	0.00384868	acsbg2	acyl-CoA synthetase bubblegum family member 2 [Source:ZFIN;Acc:ZDB-GENE-030131-7099]	acsl4a	Opisthokonta	UP
ENSOMYG00000010903	1.77692	0.00384868	acsbg2	acyl-CoA synthetase bubblegum family member 2 [Source:ZFIN;Acc:ZDB-GENE-030131-7099]	acsl1a	Opisthokonta	UP
ENSOMYG00000010903	1.77692	0.00384868	acsbg2	acyl-CoA synthetase bubblegum family member 2 [Source:ZFIN;Acc:ZDB-GENE-030131-7099]	ACSL1	Opisthokonta	UP
ENSOMYG00000010958	1.37488	0.0285462	zdhhc3b	zinc finger DHHC-type palmitoyltransferase 3b [Source:ZFIN;Acc:ZDB-GENE-061110-19]	zdhhc3b	Salmoninae	UP
ENSOMYG00000010958	1.37488	0.0285462	zdhhc3b	zinc finger DHHC-type palmitoyltransferase 3b [Source:ZFIN;Acc:ZDB-GENE-061110-19]	zdhhc3a	Actinopterygii	UP
ENSOMYG00000010958	1.37488	0.0285462	zdhhc3b	zinc finger DHHC-type palmitoyltransferase 3b [Source:ZFIN;Acc:ZDB-GENE-061110-19]	zdhhc4	Opisthokonta	UP
ENSOMYG00000010958	1.37488	0.0285462	zdhhc3b	zinc finger DHHC-type palmitoyltransferase 3b [Source:ZFIN;Acc:ZDB-GENE-061110-19]	zdhhc23b	Opisthokonta	UP
ENSOMYG00000010958	1.37488	0.0285462	zdhhc3b	zinc finger DHHC-type palmitoyltransferase 3b [Source:ZFIN;Acc:ZDB-GENE-061110-19]	NA	Opisthokonta	UP
ENSOMYG00000010958	1.37488	0.0285462	zdhhc3b	zinc finger DHHC-type palmitoyltransferase 3b [Source:ZFIN;Acc:ZDB-GENE-061110-19]	zdhhc22	Opisthokonta	UP
ENSOMYG00000010958	1.37488	0.0285462	zdhhc3b	zinc finger DHHC-type palmitoyltransferase 3b [Source:ZFIN;Acc:ZDB-GENE-061110-19]	zdhhc1	Opisthokonta	UP
ENSOMYG00000010958	1.37488	0.0285462	zdhhc3b	zinc finger DHHC-type palmitoyltransferase 3b [Source:ZFIN;Acc:ZDB-GENE-061110-19]	ZDHHC1	Opisthokonta	UP
ENSOMYG00000010958	1.37488	0.0285462	zdhhc3b	zinc finger DHHC-type palmitoyltransferase 3b [Source:ZFIN;Acc:ZDB-GENE-061110-19]	zgc:77880	Opisthokonta	UP
ENSOMYG00000010958	1.37488	0.0285462	zdhhc3b	zinc finger DHHC-type palmitoyltransferase 3b [Source:ZFIN;Acc:ZDB-GENE-061110-19]	ZDHHC14	Opisthokonta	UP
ENSOMYG00000010958	1.37488	0.0285462	zdhhc3b	zinc finger DHHC-type palmitoyltransferase 3b [Source:ZFIN;Acc:ZDB-GENE-061110-19]	zdhhc14	Opisthokonta	UP
ENSOMYG00000010958	1.37488	0.0285462	zdhhc3b	zinc finger DHHC-type palmitoyltransferase 3b [Source:ZFIN;Acc:ZDB-GENE-061110-19]	zdhhc9	Opisthokonta	UP
ENSOMYG00000010958	1.37488	0.0285462	zdhhc3b	zinc finger DHHC-type palmitoyltransferase 3b [Source:ZFIN;Acc:ZDB-GENE-061110-19]	ZDHHC9	Opisthokonta	UP
ENSOMYG00000010958	1.37488	0.0285462	zdhhc3b	zinc finger DHHC-type palmitoyltransferase 3b [Source:ZFIN;Acc:ZDB-GENE-061110-19]	zdhhc20a	Opisthokonta	UP
ENSOMYG00000010958	1.37488	0.0285462	zdhhc3b	zinc finger DHHC-type palmitoyltransferase 3b [Source:ZFIN;Acc:ZDB-GENE-061110-19]	zdhhc2	Opisthokonta	UP
ENSOMYG00000010958	1.37488	0.0285462	zdhhc3b	zinc finger DHHC-type palmitoyltransferase 3b [Source:ZFIN;Acc:ZDB-GENE-061110-19]	zdhhc18b	Opisthokonta	UP
ENSOMYG00000010958	1.37488	0.0285462	zdhhc3b	zinc finger DHHC-type palmitoyltransferase 3b [Source:ZFIN;Acc:ZDB-GENE-061110-19]	zdhhc18a	Opisthokonta	UP
ENSOMYG00000010958	1.37488	0.0285462	zdhhc3b	zinc finger DHHC-type palmitoyltransferase 3b [Source:ZFIN;Acc:ZDB-GENE-061110-19]	zdhhc7	Opisthokonta	UP
ENSOMYG00000010958	1.37488	0.0285462	zdhhc3b	zinc finger DHHC-type palmitoyltransferase 3b [Source:ZFIN;Acc:ZDB-GENE-061110-19]	ZDHHC15	Opisthokonta	UP
ENSOMYG00000010958	1.37488	0.0285462	zdhhc3b	zinc finger DHHC-type palmitoyltransferase 3b [Source:ZFIN;Acc:ZDB-GENE-061110-19]	zdhhc6	Opisthokonta	UP
ENSOMYG00000010965	-1.065	0.0299063	gadd45aa	growth arrest and DNA-damage-inducible, alpha, a [Source:ZFIN;Acc:ZDB-GENE-040426-1501]	gadd45aa	Protacanthopterygii	DOWN
ENSOMYG00000010965	-1.065	0.0299063	gadd45aa	growth arrest and DNA-damage-inducible, alpha, a [Source:ZFIN;Acc:ZDB-GENE-040426-1501]	gadd45ab	Clupeocephala	DOWN
ENSOMYG00000010965	-1.065	0.0299063	gadd45aa	growth arrest and DNA-damage-inducible, alpha, a [Source:ZFIN;Acc:ZDB-GENE-040426-1501]	GADD45B	Gnathostomata	DOWN
ENSOMYG00000010965	-1.065	0.0299063	gadd45aa	growth arrest and DNA-damage-inducible, alpha, a [Source:ZFIN;Acc:ZDB-GENE-040426-1501]	gadd45ga	Gnathostomata	DOWN
ENSOMYG00000010965	-1.065	0.0299063	gadd45aa	growth arrest and DNA-damage-inducible, alpha, a [Source:ZFIN;Acc:ZDB-GENE-040426-1501]	gadd45gb.1	Gnathostomata	DOWN
ENSOMYG00000010965	-1.065	0.0299063	gadd45aa	growth arrest and DNA-damage-inducible, alpha, a [Source:ZFIN;Acc:ZDB-GENE-040426-1501]	NA	Gnathostomata	DOWN
ENSOMYG00000010965	-1.065	0.0299063	gadd45aa	growth arrest and DNA-damage-inducible, alpha, a [Source:ZFIN;Acc:ZDB-GENE-040426-1501]	ga45b	Gnathostomata	DOWN
ENSOMYG00000011026	-1.22116	0.000678349	NA	NA	top2b	Opisthokonta	DOWN
ENSOMYG00000011036	1.19447	0.0406211	NA	NA	NA	Salmoninae	UP
ENSOMYG00000011036	1.19447	0.0406211	NA	NA	NA	Osteoglossocephalai	UP
ENSOMYG00000011036	1.19447	0.0406211	NA	NA	tbc1d2	Opisthokonta	UP
ENSOMYG00000011036	1.19447	0.0406211	NA	NA	NA	Opisthokonta	UP
ENSOMYG00000011036	1.19447	0.0406211	NA	NA	tbc1d17	Opisthokonta	UP
ENSOMYG00000011036	1.19447	0.0406211	NA	NA	tbc1d10b	Opisthokonta	UP
ENSOMYG00000011036	1.19447	0.0406211	NA	NA	rabgap1l2	Opisthokonta	UP
ENSOMYG00000011036	1.19447	0.0406211	NA	NA	tbc1d8b	Opisthokonta	UP
ENSOMYG00000011036	1.19447	0.0406211	NA	NA	TBC1D1	Opisthokonta	UP
ENSOMYG00000011036	1.19447	0.0406211	NA	NA	TBC1D10A	Opisthokonta	UP
ENSOMYG00000011036	1.19447	0.0406211	NA	NA	tbc1d25	Opisthokonta	UP
ENSOMYG00000011036	1.19447	0.0406211	NA	NA	grtp1b	Opisthokonta	UP
ENSOMYG00000011036	1.19447	0.0406211	NA	NA	grtp1a	Opisthokonta	UP
ENSOMYG00000011036	1.19447	0.0406211	NA	NA	si:dkey-238d18.4	Opisthokonta	UP
ENSOMYG00000011036	1.19447	0.0406211	NA	NA	tbc1d22a	Opisthokonta	UP
ENSOMYG00000011036	1.19447	0.0406211	NA	NA	tbc1d12b	Opisthokonta	UP
ENSOMYG00000011036	1.19447	0.0406211	NA	NA	TBC1D4	Opisthokonta	UP
ENSOMYG00000011036	1.19447	0.0406211	NA	NA	evi5b	Opisthokonta	UP
ENSOMYG00000011036	1.19447	0.0406211	NA	NA	tbc1d30	Opisthokonta	UP
ENSOMYG00000011036	1.19447	0.0406211	NA	NA	usp6nl	Opisthokonta	UP
ENSOMYG00000011036	1.19447	0.0406211	NA	NA	tbc1d5	Opisthokonta	UP
ENSOMYG00000011036	1.19447	0.0406211	NA	NA	tbck	Opisthokonta	UP
ENSOMYG00000011036	1.19447	0.0406211	NA	NA	tbc1d9	Opisthokonta	UP
ENSOMYG00000011036	1.19447	0.0406211	NA	NA	si:ch211-266k8.4	Opisthokonta	UP
ENSOMYG00000011036	1.19447	0.0406211	NA	NA	TBC1D8	Opisthokonta	UP
ENSOMYG00000011036	1.19447	0.0406211	NA	NA	TBC1D14	Opisthokonta	UP
ENSOMYG00000011036	1.19447	0.0406211	NA	NA	tbc1d14	Opisthokonta	UP
ENSOMYG00000011036	1.19447	0.0406211	NA	NA	tbc1d16	Opisthokonta	UP
ENSOMYG00000011036	1.19447	0.0406211	NA	NA	rabgap1	Opisthokonta	UP
ENSOMYG00000011036	1.19447	0.0406211	NA	NA	TBC1D9B	Opisthokonta	UP
ENSOMYG00000011036	1.19447	0.0406211	NA	NA	si:dkeyp-19e1.3	Opisthokonta	UP
ENSOMYG00000011036	1.19447	0.0406211	NA	NA	tbc1d10c	Opisthokonta	UP
ENSOMYG00000011119	1.03153	0.010501	camlg	calcium modulating ligand [Source:ZFIN;Acc:ZDB-GENE-040426-2407]	NA	Salmoninae	UP
ENSOMYG00000011219	1.15861	0.00261735	NA	forkhead box A2 [Source:HGNC Symbol;Acc:HGNC:5022]	NA	Salmoninae	UP
ENSOMYG00000011219	1.15861	0.00261735	NA	forkhead box A2 [Source:HGNC Symbol;Acc:HGNC:5022]	foxa2	Gnathostomata	UP
ENSOMYG00000011219	1.15861	0.00261735	NA	forkhead box A2 [Source:HGNC Symbol;Acc:HGNC:5022]	NA	Opisthokonta	UP
ENSOMYG00000011219	1.15861	0.00261735	NA	forkhead box A2 [Source:HGNC Symbol;Acc:HGNC:5022]	foxd7	Opisthokonta	UP
ENSOMYG00000011219	1.15861	0.00261735	NA	forkhead box A2 [Source:HGNC Symbol;Acc:HGNC:5022]	foxd5	Opisthokonta	UP
ENSOMYG00000011219	1.15861	0.00261735	NA	forkhead box A2 [Source:HGNC Symbol;Acc:HGNC:5022]	foxd1	Opisthokonta	UP
ENSOMYG00000011219	1.15861	0.00261735	NA	forkhead box A2 [Source:HGNC Symbol;Acc:HGNC:5022]	foxj1b	Opisthokonta	UP
ENSOMYG00000011219	1.15861	0.00261735	NA	forkhead box A2 [Source:HGNC Symbol;Acc:HGNC:5022]	foxk2b	Opisthokonta	UP
ENSOMYG00000011219	1.15861	0.00261735	NA	forkhead box A2 [Source:HGNC Symbol;Acc:HGNC:5022]	foxf2a	Opisthokonta	UP
ENSOMYG00000011219	1.15861	0.00261735	NA	forkhead box A2 [Source:HGNC Symbol;Acc:HGNC:5022]	foxf2b	Opisthokonta	UP
ENSOMYG00000011219	1.15861	0.00261735	NA	forkhead box A2 [Source:HGNC Symbol;Acc:HGNC:5022]	foxn1	Opisthokonta	UP
ENSOMYG00000011219	1.15861	0.00261735	NA	forkhead box A2 [Source:HGNC Symbol;Acc:HGNC:5022]	foxl1	Opisthokonta	UP
ENSOMYG00000011219	1.15861	0.00261735	NA	forkhead box A2 [Source:HGNC Symbol;Acc:HGNC:5022]	FOXO1	Opisthokonta	UP
ENSOMYG00000011219	1.15861	0.00261735	NA	forkhead box A2 [Source:HGNC Symbol;Acc:HGNC:5022]	foxo1a	Opisthokonta	UP
ENSOMYG00000011219	1.15861	0.00261735	NA	forkhead box A2 [Source:HGNC Symbol;Acc:HGNC:5022]	foxe3	Opisthokonta	UP
ENSOMYG00000011219	1.15861	0.00261735	NA	forkhead box A2 [Source:HGNC Symbol;Acc:HGNC:5022]	foxo3b	Opisthokonta	UP
ENSOMYG00000011219	1.15861	0.00261735	NA	forkhead box A2 [Source:HGNC Symbol;Acc:HGNC:5022]	foxo3a	Opisthokonta	UP
ENSOMYG00000011219	1.15861	0.00261735	NA	forkhead box A2 [Source:HGNC Symbol;Acc:HGNC:5022]	foxp3-1	Opisthokonta	UP
ENSOMYG00000011219	1.15861	0.00261735	NA	forkhead box A2 [Source:HGNC Symbol;Acc:HGNC:5022]	foxp3-2	Opisthokonta	UP
ENSOMYG00000011219	1.15861	0.00261735	NA	forkhead box A2 [Source:HGNC Symbol;Acc:HGNC:5022]	foxi3a	Opisthokonta	UP
ENSOMYG00000011219	1.15861	0.00261735	NA	forkhead box A2 [Source:HGNC Symbol;Acc:HGNC:5022]	foxi3b	Opisthokonta	UP
ENSOMYG00000011219	1.15861	0.00261735	NA	forkhead box A2 [Source:HGNC Symbol;Acc:HGNC:5022]	foxi1	Opisthokonta	UP
ENSOMYG00000011219	1.15861	0.00261735	NA	forkhead box A2 [Source:HGNC Symbol;Acc:HGNC:5022]	foxa3	Opisthokonta	UP
ENSOMYG00000011219	1.15861	0.00261735	NA	forkhead box A2 [Source:HGNC Symbol;Acc:HGNC:5022]	FOXH1	Opisthokonta	UP
ENSOMYG00000011219	1.15861	0.00261735	NA	forkhead box A2 [Source:HGNC Symbol;Acc:HGNC:5022]	foxi2	Opisthokonta	UP
ENSOMYG00000011219	1.15861	0.00261735	NA	forkhead box A2 [Source:HGNC Symbol;Acc:HGNC:5022]	FOXB2	Opisthokonta	UP
ENSOMYG00000011219	1.15861	0.00261735	NA	forkhead box A2 [Source:HGNC Symbol;Acc:HGNC:5022]	foxf1	Opisthokonta	UP
ENSOMYG00000011219	1.15861	0.00261735	NA	forkhead box A2 [Source:HGNC Symbol;Acc:HGNC:5022]	foxo6b	Opisthokonta	UP
ENSOMYG00000011219	1.15861	0.00261735	NA	forkhead box A2 [Source:HGNC Symbol;Acc:HGNC:5022]	foxj2	Opisthokonta	UP
ENSOMYG00000011219	1.15861	0.00261735	NA	forkhead box A2 [Source:HGNC Symbol;Acc:HGNC:5022]	foxl2l	Opisthokonta	UP
ENSOMYG00000011219	1.15861	0.00261735	NA	forkhead box A2 [Source:HGNC Symbol;Acc:HGNC:5022]	foxb1a	Opisthokonta	UP
ENSOMYG00000011219	1.15861	0.00261735	NA	forkhead box A2 [Source:HGNC Symbol;Acc:HGNC:5022]	foxd3	Opisthokonta	UP
ENSOMYG00000011219	1.15861	0.00261735	NA	forkhead box A2 [Source:HGNC Symbol;Acc:HGNC:5022]	foxd2	Opisthokonta	UP
ENSOMYG00000011219	1.15861	0.00261735	NA	forkhead box A2 [Source:HGNC Symbol;Acc:HGNC:5022]	foxq1b	Opisthokonta	UP
ENSOMYG00000011219	1.15861	0.00261735	NA	forkhead box A2 [Source:HGNC Symbol;Acc:HGNC:5022]	foxq1a	Opisthokonta	UP
ENSOMYG00000011219	1.15861	0.00261735	NA	forkhead box A2 [Source:HGNC Symbol;Acc:HGNC:5022]	FOXC1	Opisthokonta	UP
ENSOMYG00000011219	1.15861	0.00261735	NA	forkhead box A2 [Source:HGNC Symbol;Acc:HGNC:5022]	foxc1a	Opisthokonta	UP
ENSOMYG00000011219	1.15861	0.00261735	NA	forkhead box A2 [Source:HGNC Symbol;Acc:HGNC:5022]	foxo4	Opisthokonta	UP
ENSOMYG00000011219	1.15861	0.00261735	NA	forkhead box A2 [Source:HGNC Symbol;Acc:HGNC:5022]	foxq2	Opisthokonta	UP
ENSOMYG00000011219	1.15861	0.00261735	NA	forkhead box A2 [Source:HGNC Symbol;Acc:HGNC:5022]	foxa1	Opisthokonta	UP
ENSOMYG00000011281	3.33921	0.000546523	NA	NA	NA	Oncorhynchus	UP
ENSOMYG00000011281	3.33921	0.000546523	NA	NA	NA	Bilateria	UP
ENSOMYG00000011281	3.33921	0.000546523	NA	NA	crocc2	Bilateria	UP
ENSOMYG00000011281	3.33921	0.000546523	NA	NA	CROCC	Bilateria	UP
ENSOMYG00000011310	1.1499	2.60536e-05	NA	NA	NA	Salmoninae	UP
ENSOMYG00000011310	1.1499	2.60536e-05	NA	NA	carmil3	Neopterygii	UP
ENSOMYG00000011310	1.1499	2.60536e-05	NA	NA	NA	Bilateria	UP
ENSOMYG00000011310	1.1499	2.60536e-05	NA	NA	ppp1r37	Bilateria	UP
ENSOMYG00000011310	1.1499	2.60536e-05	NA	NA	si:dkey-288a3.2	Bilateria	UP
ENSOMYG00000011488	-2.49682	0.00640458	NA	NA	eomesa	Salmoninae	DOWN
ENSOMYG00000011488	-2.49682	0.00640458	NA	NA	eomesb	Osteoglossocephalai	DOWN
ENSOMYG00000011488	-2.49682	0.00640458	NA	NA	NA	Bilateria	DOWN
ENSOMYG00000011488	-2.49682	0.00640458	NA	NA	tbx2a	Bilateria	DOWN
ENSOMYG00000011488	-2.49682	0.00640458	NA	NA	tbx2b	Bilateria	DOWN
ENSOMYG00000011488	-2.49682	0.00640458	NA	NA	tbx16l	Bilateria	DOWN
ENSOMYG00000011488	-2.49682	0.00640458	NA	NA	tbx16	Bilateria	DOWN
ENSOMYG00000011488	-2.49682	0.00640458	NA	NA	tbx1	Bilateria	DOWN
ENSOMYG00000011488	-2.49682	0.00640458	NA	NA	tbx4	Bilateria	DOWN
ENSOMYG00000011488	-2.49682	0.00640458	NA	NA	mgaa	Bilateria	DOWN
ENSOMYG00000011488	-2.49682	0.00640458	NA	NA	tbx5a	Bilateria	DOWN
ENSOMYG00000011488	-2.49682	0.00640458	NA	NA	tbx5b	Bilateria	DOWN
ENSOMYG00000011488	-2.49682	0.00640458	NA	NA	tbx21	Bilateria	DOWN
ENSOMYG00000011488	-2.49682	0.00640458	NA	NA	ntl	Bilateria	DOWN
ENSOMYG00000011488	-2.49682	0.00640458	NA	NA	tbx6	Bilateria	DOWN
ENSOMYG00000011488	-2.49682	0.00640458	NA	NA	tbx15	Bilateria	DOWN
ENSOMYG00000011488	-2.49682	0.00640458	NA	NA	tbxtb	Bilateria	DOWN
ENSOMYG00000011488	-2.49682	0.00640458	NA	NA	tbr1b	Bilateria	DOWN
ENSOMYG00000011488	-2.49682	0.00640458	NA	NA	tbx3b	Bilateria	DOWN
ENSOMYG00000011488	-2.49682	0.00640458	NA	NA	tbx3a	Bilateria	DOWN
ENSOMYG00000011534	1.10188	0.0343163	NA	NA	spag9a	Oncorhynchus mykiss	UP
ENSOMYG00000011534	1.10188	0.0343163	NA	NA	NA	Osteoglossocephalai	UP
ENSOMYG00000011534	1.10188	0.0343163	NA	NA	NA	Vertebrata	UP
ENSOMYG00000011534	1.10188	0.0343163	NA	NA	mapk8ip3	Vertebrata	UP
ENSOMYG00000011719	-1.2887	0.00439212	NA	NA	DYNLT3	Bilateria	DOWN
ENSOMYG00000011719	-1.2887	0.00439212	NA	NA	NA	Bilateria	DOWN
ENSOMYG00000011719	-1.2887	0.00439212	NA	NA	dynlt2b	Bilateria	DOWN
ENSOMYG00000011719	-1.2887	0.00439212	NA	NA	dynlt5	Bilateria	DOWN
ENSOMYG00000011719	-1.2887	0.00439212	NA	NA	dynlt1b	Bilateria	DOWN
ENSOMYG00000011845	1.32548	0.0115527	alg1	ALG1 chitobiosyldiphosphodolichol beta-mannosyltransferase [Source:ZFIN;Acc:ZDB-GENE-030131-6093]	alg1	Salmoninae	UP
ENSOMYG00000011988	-1.18274	0.0103173	wdhd1	WD repeat and HMG-box DNA binding protein 1 [Source:ZFIN;Acc:ZDB-GENE-030131-1665]	NA	NA	DOWN
ENSOMYG00000012221	-1.03722	0.0105222	mmp11a	matrix metallopeptidase 11a [Source:ZFIN;Acc:ZDB-GENE-070817-3]	hpxa	Bilateria	DOWN
ENSOMYG00000012221	-1.03722	0.0105222	mmp11a	matrix metallopeptidase 11a [Source:ZFIN;Acc:ZDB-GENE-070817-3]	NA	Bilateria	DOWN
ENSOMYG00000012221	-1.03722	0.0105222	mmp11a	matrix metallopeptidase 11a [Source:ZFIN;Acc:ZDB-GENE-070817-3]	MMP16	Bilateria	DOWN
ENSOMYG00000012221	-1.03722	0.0105222	mmp11a	matrix metallopeptidase 11a [Source:ZFIN;Acc:ZDB-GENE-070817-3]	mmp16b	Bilateria	DOWN
ENSOMYG00000012221	-1.03722	0.0105222	mmp11a	matrix metallopeptidase 11a [Source:ZFIN;Acc:ZDB-GENE-070817-3]	mmp15b	Bilateria	DOWN
ENSOMYG00000012221	-1.03722	0.0105222	mmp11a	matrix metallopeptidase 11a [Source:ZFIN;Acc:ZDB-GENE-070817-3]	mmp15a	Bilateria	DOWN
ENSOMYG00000012221	-1.03722	0.0105222	mmp11a	matrix metallopeptidase 11a [Source:ZFIN;Acc:ZDB-GENE-070817-3]	mmp9	Bilateria	DOWN
ENSOMYG00000012221	-1.03722	0.0105222	mmp11a	matrix metallopeptidase 11a [Source:ZFIN;Acc:ZDB-GENE-070817-3]	mmp14b	Bilateria	DOWN
ENSOMYG00000012221	-1.03722	0.0105222	mmp11a	matrix metallopeptidase 11a [Source:ZFIN;Acc:ZDB-GENE-070817-3]	mmp14a	Bilateria	DOWN
ENSOMYG00000012221	-1.03722	0.0105222	mmp11a	matrix metallopeptidase 11a [Source:ZFIN;Acc:ZDB-GENE-070817-3]	mmp30	Bilateria	DOWN
ENSOMYG00000012221	-1.03722	0.0105222	mmp11a	matrix metallopeptidase 11a [Source:ZFIN;Acc:ZDB-GENE-070817-3]	mmp17b	Bilateria	DOWN
ENSOMYG00000012221	-1.03722	0.0105222	mmp11a	matrix metallopeptidase 11a [Source:ZFIN;Acc:ZDB-GENE-070817-3]	mmp23bb	Bilateria	DOWN
ENSOMYG00000012221	-1.03722	0.0105222	mmp11a	matrix metallopeptidase 11a [Source:ZFIN;Acc:ZDB-GENE-070817-3]	mmp23ba	Bilateria	DOWN
ENSOMYG00000012221	-1.03722	0.0105222	mmp11a	matrix metallopeptidase 11a [Source:ZFIN;Acc:ZDB-GENE-070817-3]	mmp2	Bilateria	DOWN
ENSOMYG00000012221	-1.03722	0.0105222	mmp11a	matrix metallopeptidase 11a [Source:ZFIN;Acc:ZDB-GENE-070817-3]	mmp28	Bilateria	DOWN
ENSOMYG00000012221	-1.03722	0.0105222	mmp11a	matrix metallopeptidase 11a [Source:ZFIN;Acc:ZDB-GENE-070817-3]	mmp11a	Salmoninae	DOWN
ENSOMYG00000012221	-1.03722	0.0105222	mmp11a	matrix metallopeptidase 11a [Source:ZFIN;Acc:ZDB-GENE-070817-3]	NA	Osteoglossocephalai	DOWN
ENSOMYG00000012221	-1.03722	0.0105222	mmp11a	matrix metallopeptidase 11a [Source:ZFIN;Acc:ZDB-GENE-070817-3]	NA	Euteleostomi	DOWN
ENSOMYG00000012271	3.21015	2.99443e-14	vkorc1l1	vitamin K epoxide reductase complex, subunit 1-like 1 [Source:ZFIN;Acc:ZDB-GENE-050522-210]	NA	Bilateria	UP
ENSOMYG00000012271	3.21015	2.99443e-14	vkorc1l1	vitamin K epoxide reductase complex, subunit 1-like 1 [Source:ZFIN;Acc:ZDB-GENE-050522-210]	vkorc1l1	Salmoninae	UP
ENSOMYG00000012288	1.47149	0.0374571	ttc7a	tetratricopeptide repeat domain 7A [Source:ZFIN;Acc:ZDB-GENE-010319-27]	ttc7a	Salmoninae	UP
ENSOMYG00000012288	1.47149	0.0374571	ttc7a	tetratricopeptide repeat domain 7A [Source:ZFIN;Acc:ZDB-GENE-010319-27]	cfap70	Bilateria	UP
ENSOMYG00000012288	1.47149	0.0374571	ttc7a	tetratricopeptide repeat domain 7A [Source:ZFIN;Acc:ZDB-GENE-010319-27]	NA	Bilateria	UP
ENSOMYG00000012288	1.47149	0.0374571	ttc7a	tetratricopeptide repeat domain 7A [Source:ZFIN;Acc:ZDB-GENE-010319-27]	tmtc1	Bilateria	UP
ENSOMYG00000012288	1.47149	0.0374571	ttc7a	tetratricopeptide repeat domain 7A [Source:ZFIN;Acc:ZDB-GENE-010319-27]	si:dkey-12j5.1	Bilateria	UP
ENSOMYG00000012288	1.47149	0.0374571	ttc7a	tetratricopeptide repeat domain 7A [Source:ZFIN;Acc:ZDB-GENE-010319-27]	TTC6	Bilateria	UP
ENSOMYG00000012288	1.47149	0.0374571	ttc7a	tetratricopeptide repeat domain 7A [Source:ZFIN;Acc:ZDB-GENE-010319-27]	ttc13	Bilateria	UP
ENSOMYG00000012288	1.47149	0.0374571	ttc7a	tetratricopeptide repeat domain 7A [Source:ZFIN;Acc:ZDB-GENE-010319-27]	ift88	Bilateria	UP
ENSOMYG00000012288	1.47149	0.0374571	ttc7a	tetratricopeptide repeat domain 7A [Source:ZFIN;Acc:ZDB-GENE-010319-27]	tmtc3	Bilateria	UP
ENSOMYG00000012288	1.47149	0.0374571	ttc7a	tetratricopeptide repeat domain 7A [Source:ZFIN;Acc:ZDB-GENE-010319-27]	tmtc4	Bilateria	UP
ENSOMYG00000012427	-1.60426	0.000444802	NA	NA	recql5	Opisthokonta	DOWN
ENSOMYG00000012427	-1.60426	0.000444802	NA	NA	wrn	Opisthokonta	DOWN
ENSOMYG00000012427	-1.60426	0.000444802	NA	NA	blm	Opisthokonta	DOWN
ENSOMYG00000012427	-1.60426	0.000444802	NA	NA	RECQL	Opisthokonta	DOWN
ENSOMYG00000012434	1.41616	1.17272e-07	CREM	cAMP responsive element modulator [Source:HGNC Symbol;Acc:HGNC:2352]	CREM	Salmoninae	UP
ENSOMYG00000012434	1.41616	1.17272e-07	CREM	cAMP responsive element modulator [Source:HGNC Symbol;Acc:HGNC:2352]	CREM	Osteoglossocephalai	UP
ENSOMYG00000012434	1.41616	1.17272e-07	CREM	cAMP responsive element modulator [Source:HGNC Symbol;Acc:HGNC:2352]	atf1	Bilateria	UP
ENSOMYG00000012434	1.41616	1.17272e-07	CREM	cAMP responsive element modulator [Source:HGNC Symbol;Acc:HGNC:2352]	creb1b	Bilateria	UP
ENSOMYG00000012434	1.41616	1.17272e-07	CREM	cAMP responsive element modulator [Source:HGNC Symbol;Acc:HGNC:2352]	CREB1	Bilateria	UP
ENSOMYG00000012434	1.41616	1.17272e-07	CREM	cAMP responsive element modulator [Source:HGNC Symbol;Acc:HGNC:2352]	NA	Bilateria	UP
ENSOMYG00000012434	1.41616	1.17272e-07	CREM	cAMP responsive element modulator [Source:HGNC Symbol;Acc:HGNC:2352]	creb3l1	Bilateria	UP
ENSOMYG00000012434	1.41616	1.17272e-07	CREM	cAMP responsive element modulator [Source:HGNC Symbol;Acc:HGNC:2352]	creb3l3l	Bilateria	UP
ENSOMYG00000012434	1.41616	1.17272e-07	CREM	cAMP responsive element modulator [Source:HGNC Symbol;Acc:HGNC:2352]	creb3l3a	Bilateria	UP
ENSOMYG00000012434	1.41616	1.17272e-07	CREM	cAMP responsive element modulator [Source:HGNC Symbol;Acc:HGNC:2352]	CREB3L4	Bilateria	UP
ENSOMYG00000012434	1.41616	1.17272e-07	CREM	cAMP responsive element modulator [Source:HGNC Symbol;Acc:HGNC:2352]	creb3l2	Bilateria	UP
ENSOMYG00000012456	-2.0619	0.00566384	brinp3a.2	bone morphogenetic protein/retinoic acid inducible neural-specific 3a, tandem duplicate 2 [Source:ZFIN;Acc:ZDB-GENE-131119-53]	brinp3a.1	Vertebrata	DOWN
ENSOMYG00000012456	-2.0619	0.00566384	brinp3a.2	bone morphogenetic protein/retinoic acid inducible neural-specific 3a, tandem duplicate 2 [Source:ZFIN;Acc:ZDB-GENE-131119-53]	brinp3b	Vertebrata	DOWN
ENSOMYG00000012456	-2.0619	0.00566384	brinp3a.2	bone morphogenetic protein/retinoic acid inducible neural-specific 3a, tandem duplicate 2 [Source:ZFIN;Acc:ZDB-GENE-131119-53]	brinp2	Vertebrata	DOWN
ENSOMYG00000012456	-2.0619	0.00566384	brinp3a.2	bone morphogenetic protein/retinoic acid inducible neural-specific 3a, tandem duplicate 2 [Source:ZFIN;Acc:ZDB-GENE-131119-53]	brinp1	Vertebrata	DOWN
ENSOMYG00000012456	-2.0619	0.00566384	brinp3a.2	bone morphogenetic protein/retinoic acid inducible neural-specific 3a, tandem duplicate 2 [Source:ZFIN;Acc:ZDB-GENE-131119-53]	brinp3a.2	Salmoninae	DOWN
ENSOMYG00000012505	-1.338	0.0152862	NA	NA	NA	Opisthokonta	DOWN
ENSOMYG00000012505	-1.338	0.0152862	NA	NA	NA	Salmoninae	DOWN
ENSOMYG00000012505	-1.338	0.0152862	NA	NA	NA	Clupeocephala	DOWN
ENSOMYG00000012505	-1.338	0.0152862	NA	NA	NA	Osteoglossocephalai	DOWN
ENSOMYG00000012505	-1.338	0.0152862	NA	NA	NA	Gnathostomata	DOWN
ENSOMYG00000012532	2.84461	0.00600989	ywhag1	3-monooxygenase/tryptophan 5-monooxygenase activation protein, gamma polypeptide 1 [Source:ZFIN;Acc:ZDB-GENE-011115-1]	ywhae1	Opisthokonta	UP
ENSOMYG00000012532	2.84461	0.00600989	ywhag1	3-monooxygenase/tryptophan 5-monooxygenase activation protein, gamma polypeptide 1 [Source:ZFIN;Acc:ZDB-GENE-011115-1]	NA	Opisthokonta	UP
ENSOMYG00000012532	2.84461	0.00600989	ywhag1	3-monooxygenase/tryptophan 5-monooxygenase activation protein, gamma polypeptide 1 [Source:ZFIN;Acc:ZDB-GENE-011115-1]	ywhag1	Oncorhynchus	UP
ENSOMYG00000012532	2.84461	0.00600989	ywhag1	3-monooxygenase/tryptophan 5-monooxygenase activation protein, gamma polypeptide 1 [Source:ZFIN;Acc:ZDB-GENE-011115-1]	ywhag2	Osteoglossocephalai	UP
ENSOMYG00000012532	2.84461	0.00600989	ywhag1	3-monooxygenase/tryptophan 5-monooxygenase activation protein, gamma polypeptide 1 [Source:ZFIN;Acc:ZDB-GENE-011115-1]	NA	Osteoglossocephalai	UP
ENSOMYG00000012532	2.84461	0.00600989	ywhag1	3-monooxygenase/tryptophan 5-monooxygenase activation protein, gamma polypeptide 1 [Source:ZFIN;Acc:ZDB-GENE-011115-1]	ywhah	Gnathostomata	UP
ENSOMYG00000012532	2.84461	0.00600989	ywhag1	3-monooxygenase/tryptophan 5-monooxygenase activation protein, gamma polypeptide 1 [Source:ZFIN;Acc:ZDB-GENE-011115-1]	NA	Chordata	UP
ENSOMYG00000012532	2.84461	0.00600989	ywhag1	3-monooxygenase/tryptophan 5-monooxygenase activation protein, gamma polypeptide 1 [Source:ZFIN;Acc:ZDB-GENE-011115-1]	ywhaqa	Chordata	UP
ENSOMYG00000012532	2.84461	0.00600989	ywhag1	3-monooxygenase/tryptophan 5-monooxygenase activation protein, gamma polypeptide 1 [Source:ZFIN;Acc:ZDB-GENE-011115-1]	YWHAQ	Chordata	UP
ENSOMYG00000012532	2.84461	0.00600989	ywhag1	3-monooxygenase/tryptophan 5-monooxygenase activation protein, gamma polypeptide 1 [Source:ZFIN;Acc:ZDB-GENE-011115-1]	ywhaba	Chordata	UP
ENSOMYG00000012532	2.84461	0.00600989	ywhag1	3-monooxygenase/tryptophan 5-monooxygenase activation protein, gamma polypeptide 1 [Source:ZFIN;Acc:ZDB-GENE-011115-1]	ywhaqb	Chordata	UP
ENSOMYG00000012617	1.05931	0.0137629	NA	NA	asap2a	Opisthokonta	UP
ENSOMYG00000012617	1.05931	0.0137629	NA	NA	NA	Opisthokonta	UP
ENSOMYG00000012617	1.05931	0.0137629	NA	NA	arap3	Opisthokonta	UP
ENSOMYG00000012617	1.05931	0.0137629	NA	NA	asap1b	Opisthokonta	UP
ENSOMYG00000012617	1.05931	0.0137629	NA	NA	agfg1b	Opisthokonta	UP
ENSOMYG00000012617	1.05931	0.0137629	NA	NA	agfg1a	Opisthokonta	UP
ENSOMYG00000012617	1.05931	0.0137629	NA	NA	agfg2	Opisthokonta	UP
ENSOMYG00000012617	1.05931	0.0137629	NA	NA	appl1	Opisthokonta	UP
ENSOMYG00000012617	1.05931	0.0137629	NA	NA	AGAP2	Opisthokonta	UP
ENSOMYG00000012617	1.05931	0.0137629	NA	NA	agap2	Opisthokonta	UP
ENSOMYG00000012617	1.05931	0.0137629	NA	NA	agap1	Opisthokonta	UP
ENSOMYG00000012617	1.05931	0.0137629	NA	NA	AGAP3	Opisthokonta	UP
ENSOMYG00000012617	1.05931	0.0137629	NA	NA	adap2	Opisthokonta	UP
ENSOMYG00000012617	1.05931	0.0137629	NA	NA	ADAP2	Opisthokonta	UP
ENSOMYG00000012617	1.05931	0.0137629	NA	NA	asap3	Opisthokonta	UP
ENSOMYG00000012617	1.05931	0.0137629	NA	NA	appl2	Opisthokonta	UP
ENSOMYG00000012617	1.05931	0.0137629	NA	NA	acap1	Opisthokonta	UP
ENSOMYG00000012617	1.05931	0.0137629	NA	NA	acap2b	Opisthokonta	UP
ENSOMYG00000012617	1.05931	0.0137629	NA	NA	zgc:162872	Opisthokonta	UP
ENSOMYG00000012617	1.05931	0.0137629	NA	NA	git1	Opisthokonta	UP
ENSOMYG00000012617	1.05931	0.0137629	NA	NA	smap1	Opisthokonta	UP
ENSOMYG00000012617	1.05931	0.0137629	NA	NA	arap2	Opisthokonta	UP
ENSOMYG00000012617	1.05931	0.0137629	NA	NA	arfgap3	Opisthokonta	UP
ENSOMYG00000012617	1.05931	0.0137629	NA	NA	ACAP3	Opisthokonta	UP
ENSOMYG00000012617	1.05931	0.0137629	NA	NA	GIT2	Opisthokonta	UP
ENSOMYG00000012617	1.05931	0.0137629	NA	NA	git2a	Opisthokonta	UP
ENSOMYG00000012792	-1.24586	0.000686105	NA	NA	NA	Osteoglossocephalai	DOWN
ENSOMYG00000012792	-1.24586	0.000686105	NA	NA	NA	Neopterygii	DOWN
ENSOMYG00000012792	-1.24586	0.000686105	NA	NA	si:dkey-185m8.2	Neopterygii	DOWN
ENSOMYG00000012792	-1.24586	0.000686105	NA	NA	NA	Gnathostomata	DOWN
ENSOMYG00000012792	-1.24586	0.000686105	NA	NA	si:dkey-110g7.8	Gnathostomata	DOWN
ENSOMYG00000012792	-1.24586	0.000686105	NA	NA	si:dkeyp-69e1.8	Gnathostomata	DOWN
ENSOMYG00000012792	-1.24586	0.000686105	NA	NA	si:dkey-120c6.5	Gnathostomata	DOWN
ENSOMYG00000012906	1.66519	0.049609	NA	prolyl 3-hydroxylase 2 [Source:ZFIN;Acc:ZDB-GENE-061207-44]	p3h2	Salmoninae	UP
ENSOMYG00000012906	1.66519	0.049609	NA	prolyl 3-hydroxylase 2 [Source:ZFIN;Acc:ZDB-GENE-061207-44]	p3h1	Chordata	UP
ENSOMYG00000012906	1.66519	0.049609	NA	prolyl 3-hydroxylase 2 [Source:ZFIN;Acc:ZDB-GENE-061207-44]	p3h3	Chordata	UP
ENSOMYG00000012988	4.82545	0.0248526	NA	NA	NA	Salmoninae	UP
ENSOMYG00000012988	4.82545	0.0248526	NA	NA	tebp	Opisthokonta	UP
ENSOMYG00000012988	4.82545	0.0248526	NA	NA	ptges3b	Opisthokonta	UP
ENSOMYG00000012988	4.82545	0.0248526	NA	NA	ptges3a	Opisthokonta	UP
ENSOMYG00000013192	-1.24974	0.00801615	NA	NA	NA	Gnathostomata	DOWN
ENSOMYG00000013192	-1.24974	0.00801615	NA	NA	NA	Bilateria	DOWN
ENSOMYG00000013192	-1.24974	0.00801615	NA	NA	trim101	Bilateria	DOWN
ENSOMYG00000013192	-1.24974	0.00801615	NA	NA	TRIM13	Bilateria	DOWN
ENSOMYG00000013192	-1.24974	0.00801615	NA	NA	trim13	Bilateria	DOWN
ENSOMYG00000013192	-1.24974	0.00801615	NA	NA	trim55a	Bilateria	DOWN
ENSOMYG00000013192	-1.24974	0.00801615	NA	NA	trim54	Bilateria	DOWN
ENSOMYG00000013192	-1.24974	0.00801615	NA	NA	trim55b	Bilateria	DOWN
ENSOMYG00000013192	-1.24974	0.00801615	NA	NA	trim36	Bilateria	DOWN
ENSOMYG00000013192	-1.24974	0.00801615	NA	NA	trim66	Bilateria	DOWN
ENSOMYG00000013192	-1.24974	0.00801615	NA	NA	trim46a	Bilateria	DOWN
ENSOMYG00000013192	-1.24974	0.00801615	NA	NA	trim46b	Bilateria	DOWN
ENSOMYG00000013192	-1.24974	0.00801615	NA	NA	trim71	Bilateria	DOWN
ENSOMYG00000013192	-1.24974	0.00801615	NA	NA	btr02	Bilateria	DOWN
ENSOMYG00000013192	-1.24974	0.00801615	NA	NA	trim44	Bilateria	DOWN
ENSOMYG00000013192	-1.24974	0.00801615	NA	NA	TRIM32	Bilateria	DOWN
ENSOMYG00000013192	-1.24974	0.00801615	NA	NA	si:ch73-54f23.4	Bilateria	DOWN
ENSOMYG00000013192	-1.24974	0.00801615	NA	NA	zgc:194990	Bilateria	DOWN
ENSOMYG00000013192	-1.24974	0.00801615	NA	NA	si:dkey-219e21.2	Bilateria	DOWN
ENSOMYG00000013192	-1.24974	0.00801615	NA	NA	trim37	Bilateria	DOWN
ENSOMYG00000013192	-1.24974	0.00801615	NA	NA	trim2a	Bilateria	DOWN
ENSOMYG00000013192	-1.24974	0.00801615	NA	NA	trim2b	Bilateria	DOWN
ENSOMYG00000013192	-1.24974	0.00801615	NA	NA	TRIM8	Bilateria	DOWN
ENSOMYG00000013192	-1.24974	0.00801615	NA	NA	ftr83	Bilateria	DOWN
ENSOMYG00000013192	-1.24974	0.00801615	NA	NA	ftr82	Bilateria	DOWN
ENSOMYG00000013192	-1.24974	0.00801615	NA	NA	trim59	Bilateria	DOWN
ENSOMYG00000013192	-1.24974	0.00801615	NA	NA	btr12	Bilateria	DOWN
ENSOMYG00000013192	-1.24974	0.00801615	NA	NA	trim3a	Bilateria	DOWN
ENSOMYG00000013192	-1.24974	0.00801615	NA	NA	trim3b	Bilateria	DOWN
ENSOMYG00000013192	-1.24974	0.00801615	NA	NA	trim16	Bilateria	DOWN
ENSOMYG00000013192	-1.24974	0.00801615	NA	NA	trim47	Bilateria	DOWN
ENSOMYG00000013192	-1.24974	0.00801615	NA	NA	si:dkey-183c6.9	Bilateria	DOWN
ENSOMYG00000013192	-1.24974	0.00801615	NA	NA	TRIM67	Bilateria	DOWN
ENSOMYG00000013192	-1.24974	0.00801615	NA	NA	trim9	Bilateria	DOWN
ENSOMYG00000013192	-1.24974	0.00801615	NA	NA	bspry	Bilateria	DOWN
ENSOMYG00000013192	-1.24974	0.00801615	NA	NA	trim107	Bilateria	DOWN
ENSOMYG00000013192	-1.24974	0.00801615	NA	NA	trim33	Bilateria	DOWN
ENSOMYG00000013192	-1.24974	0.00801615	NA	NA	mid1	Bilateria	DOWN
ENSOMYG00000013192	-1.24974	0.00801615	NA	NA	trim69	Bilateria	DOWN
ENSOMYG00000013192	-1.24974	0.00801615	NA	NA	trim105	Bilateria	DOWN
ENSOMYG00000013192	-1.24974	0.00801615	NA	NA	mid2	Bilateria	DOWN
ENSOMYG00000013192	-1.24974	0.00801615	NA	NA	trim25	Bilateria	DOWN
ENSOMYG00000013192	-1.24974	0.00801615	NA	NA	trim63a	Bilateria	DOWN
ENSOMYG00000013192	-1.24974	0.00801615	NA	NA	NA	Neopterygii	DOWN
ENSOMYG00000013192	-1.24974	0.00801615	NA	NA	NA	Euteleostomi	DOWN
ENSOMYG00000013260	-1.04058	4.37304e-05	elovl8b	ELOVL fatty acid elongase 8b [Source:ZFIN;Acc:ZDB-GENE-050522-453]	elovl8b	Salmoninae	DOWN
ENSOMYG00000013260	-1.04058	4.37304e-05	elovl8b	ELOVL fatty acid elongase 8b [Source:ZFIN;Acc:ZDB-GENE-050522-453]	elovl8a	Osteoglossocephalai	DOWN
ENSOMYG00000013260	-1.04058	4.37304e-05	elovl8b	ELOVL fatty acid elongase 8b [Source:ZFIN;Acc:ZDB-GENE-050522-453]	elovl4a	Bilateria	DOWN
ENSOMYG00000013260	-1.04058	4.37304e-05	elovl8b	ELOVL fatty acid elongase 8b [Source:ZFIN;Acc:ZDB-GENE-050522-453]	elovl5	Bilateria	DOWN
ENSOMYG00000013260	-1.04058	4.37304e-05	elovl8b	ELOVL fatty acid elongase 8b [Source:ZFIN;Acc:ZDB-GENE-050522-453]	elovl4b	Bilateria	DOWN
ENSOMYG00000013260	-1.04058	4.37304e-05	elovl8b	ELOVL fatty acid elongase 8b [Source:ZFIN;Acc:ZDB-GENE-050522-453]	elovl2	Bilateria	DOWN
ENSOMYG00000013260	-1.04058	4.37304e-05	elovl8b	ELOVL fatty acid elongase 8b [Source:ZFIN;Acc:ZDB-GENE-050522-453]	NA	Bilateria	DOWN
ENSOMYG00000013260	-1.04058	4.37304e-05	elovl8b	ELOVL fatty acid elongase 8b [Source:ZFIN;Acc:ZDB-GENE-050522-453]	ELOVL7	Bilateria	DOWN
ENSOMYG00000013260	-1.04058	4.37304e-05	elovl8b	ELOVL fatty acid elongase 8b [Source:ZFIN;Acc:ZDB-GENE-050522-453]	elovl1b	Bilateria	DOWN
ENSOMYG00000013260	-1.04058	4.37304e-05	elovl8b	ELOVL fatty acid elongase 8b [Source:ZFIN;Acc:ZDB-GENE-050522-453]	elovl7a	Bilateria	DOWN
ENSOMYG00000013260	-1.04058	4.37304e-05	elovl8b	ELOVL fatty acid elongase 8b [Source:ZFIN;Acc:ZDB-GENE-050522-453]	elovl1a	Bilateria	DOWN
ENSOMYG00000013260	-1.04058	4.37304e-05	elovl8b	ELOVL fatty acid elongase 8b [Source:ZFIN;Acc:ZDB-GENE-050522-453]	elovl6	Opisthokonta	DOWN
ENSOMYG00000013260	-1.04058	4.37304e-05	elovl8b	ELOVL fatty acid elongase 8b [Source:ZFIN;Acc:ZDB-GENE-050522-453]	NA	Opisthokonta	DOWN
ENSOMYG00000013302	1.20684	0.0180902	NA	NA	NA	Protacanthopterygii	UP
ENSOMYG00000013302	1.20684	0.0180902	NA	NA	NA	Euteleostomi	UP
ENSOMYG00000013302	1.20684	0.0180902	NA	NA	NA	Gnathostomata	UP
ENSOMYG00000013302	1.20684	0.0180902	NA	NA	cd276	Gnathostomata	UP
ENSOMYG00000013424	1.42115	0.00871988	NA	NA	NA	Opisthokonta	UP
ENSOMYG00000013424	1.42115	0.00871988	NA	NA	ATP13A3	Opisthokonta	UP
ENSOMYG00000013424	1.42115	0.00871988	NA	NA	atp2b3a	Opisthokonta	UP
ENSOMYG00000013424	1.42115	0.00871988	NA	NA	atp1a3	Opisthokonta	UP
ENSOMYG00000013424	1.42115	0.00871988	NA	NA	ATP2C1	Opisthokonta	UP
ENSOMYG00000013424	1.42115	0.00871988	NA	NA	atp1a2a	Opisthokonta	UP
ENSOMYG00000013424	1.42115	0.00871988	NA	NA	si:dkey-28b4.8	Opisthokonta	UP
ENSOMYG00000013424	1.42115	0.00871988	NA	NA	atp13a2	Opisthokonta	UP
ENSOMYG00000013424	1.42115	0.00871988	NA	NA	atp2b4	Opisthokonta	UP
ENSOMYG00000013424	1.42115	0.00871988	NA	NA	atp2a3	Opisthokonta	UP
ENSOMYG00000013424	1.42115	0.00871988	NA	NA	atp7a	Opisthokonta	UP
ENSOMYG00000013424	1.42115	0.00871988	NA	NA	atp13a1	Opisthokonta	UP
ENSOMYG00000013572	1.56443	9.19468e-05	NA	NA	NA	Salmoninae	UP
ENSOMYG00000013572	1.56443	9.19468e-05	NA	NA	NA	Euteleosteomorpha	UP
ENSOMYG00000013572	1.56443	9.19468e-05	NA	NA	NA	Osteoglossocephalai	UP
ENSOMYG00000013572	1.56443	9.19468e-05	NA	NA	NA	Neopterygii	UP
ENSOMYG00000013572	1.56443	9.19468e-05	NA	NA	NA	Gnathostomata	UP
ENSOMYG00000013572	1.56443	9.19468e-05	NA	NA	NA	Bilateria	UP
ENSOMYG00000013572	1.56443	9.19468e-05	NA	NA	trim101	Bilateria	UP
ENSOMYG00000013572	1.56443	9.19468e-05	NA	NA	TRIM13	Bilateria	UP
ENSOMYG00000013572	1.56443	9.19468e-05	NA	NA	trim13	Bilateria	UP
ENSOMYG00000013572	1.56443	9.19468e-05	NA	NA	trim55a	Bilateria	UP
ENSOMYG00000013572	1.56443	9.19468e-05	NA	NA	trim54	Bilateria	UP
ENSOMYG00000013572	1.56443	9.19468e-05	NA	NA	trim55b	Bilateria	UP
ENSOMYG00000013572	1.56443	9.19468e-05	NA	NA	trim36	Bilateria	UP
ENSOMYG00000013572	1.56443	9.19468e-05	NA	NA	trim66	Bilateria	UP
ENSOMYG00000013572	1.56443	9.19468e-05	NA	NA	trim46a	Bilateria	UP
ENSOMYG00000013572	1.56443	9.19468e-05	NA	NA	trim46b	Bilateria	UP
ENSOMYG00000013572	1.56443	9.19468e-05	NA	NA	trim71	Bilateria	UP
ENSOMYG00000013572	1.56443	9.19468e-05	NA	NA	btr02	Bilateria	UP
ENSOMYG00000013572	1.56443	9.19468e-05	NA	NA	trim44	Bilateria	UP
ENSOMYG00000013572	1.56443	9.19468e-05	NA	NA	TRIM32	Bilateria	UP
ENSOMYG00000013572	1.56443	9.19468e-05	NA	NA	si:ch73-54f23.4	Bilateria	UP
ENSOMYG00000013572	1.56443	9.19468e-05	NA	NA	zgc:194990	Bilateria	UP
ENSOMYG00000013572	1.56443	9.19468e-05	NA	NA	si:dkey-219e21.2	Bilateria	UP
ENSOMYG00000013572	1.56443	9.19468e-05	NA	NA	trim37	Bilateria	UP
ENSOMYG00000013572	1.56443	9.19468e-05	NA	NA	trim2a	Bilateria	UP
ENSOMYG00000013572	1.56443	9.19468e-05	NA	NA	trim2b	Bilateria	UP
ENSOMYG00000013572	1.56443	9.19468e-05	NA	NA	TRIM8	Bilateria	UP
ENSOMYG00000013572	1.56443	9.19468e-05	NA	NA	ftr83	Bilateria	UP
ENSOMYG00000013572	1.56443	9.19468e-05	NA	NA	ftr82	Bilateria	UP
ENSOMYG00000013572	1.56443	9.19468e-05	NA	NA	trim59	Bilateria	UP
ENSOMYG00000013572	1.56443	9.19468e-05	NA	NA	btr12	Bilateria	UP
ENSOMYG00000013572	1.56443	9.19468e-05	NA	NA	trim3a	Bilateria	UP
ENSOMYG00000013572	1.56443	9.19468e-05	NA	NA	trim3b	Bilateria	UP
ENSOMYG00000013572	1.56443	9.19468e-05	NA	NA	trim16	Bilateria	UP
ENSOMYG00000013572	1.56443	9.19468e-05	NA	NA	trim47	Bilateria	UP
ENSOMYG00000013572	1.56443	9.19468e-05	NA	NA	si:dkey-183c6.9	Bilateria	UP
ENSOMYG00000013572	1.56443	9.19468e-05	NA	NA	TRIM67	Bilateria	UP
ENSOMYG00000013572	1.56443	9.19468e-05	NA	NA	trim9	Bilateria	UP
ENSOMYG00000013572	1.56443	9.19468e-05	NA	NA	bspry	Bilateria	UP
ENSOMYG00000013572	1.56443	9.19468e-05	NA	NA	trim107	Bilateria	UP
ENSOMYG00000013572	1.56443	9.19468e-05	NA	NA	trim33	Bilateria	UP
ENSOMYG00000013572	1.56443	9.19468e-05	NA	NA	mid1	Bilateria	UP
ENSOMYG00000013572	1.56443	9.19468e-05	NA	NA	trim69	Bilateria	UP
ENSOMYG00000013572	1.56443	9.19468e-05	NA	NA	trim105	Bilateria	UP
ENSOMYG00000013572	1.56443	9.19468e-05	NA	NA	mid2	Bilateria	UP
ENSOMYG00000013572	1.56443	9.19468e-05	NA	NA	trim25	Bilateria	UP
ENSOMYG00000013572	1.56443	9.19468e-05	NA	NA	trim63a	Bilateria	UP
ENSOMYG00000013593	-1.51704	7.3661e-05	e2f8	E2F transcription factor 8 [Source:ZFIN;Acc:ZDB-GENE-041111-260]	e2f8	Salmoninae	DOWN
ENSOMYG00000013593	-1.51704	7.3661e-05	e2f8	E2F transcription factor 8 [Source:ZFIN;Acc:ZDB-GENE-041111-260]	e2f6	Bilateria	DOWN
ENSOMYG00000013593	-1.51704	7.3661e-05	e2f8	E2F transcription factor 8 [Source:ZFIN;Acc:ZDB-GENE-041111-260]	NA	Bilateria	DOWN
ENSOMYG00000013593	-1.51704	7.3661e-05	e2f8	E2F transcription factor 8 [Source:ZFIN;Acc:ZDB-GENE-041111-260]	e2f5	Bilateria	DOWN
ENSOMYG00000013593	-1.51704	7.3661e-05	e2f8	E2F transcription factor 8 [Source:ZFIN;Acc:ZDB-GENE-041111-260]	e2f7	Bilateria	DOWN
ENSOMYG00000013593	-1.51704	7.3661e-05	e2f8	E2F transcription factor 8 [Source:ZFIN;Acc:ZDB-GENE-041111-260]	e2f3	Bilateria	DOWN
ENSOMYG00000013593	-1.51704	7.3661e-05	e2f8	E2F transcription factor 8 [Source:ZFIN;Acc:ZDB-GENE-041111-260]	e2f2	Bilateria	DOWN
ENSOMYG00000013593	-1.51704	7.3661e-05	e2f8	E2F transcription factor 8 [Source:ZFIN;Acc:ZDB-GENE-041111-260]	E2F3	Bilateria	DOWN
ENSOMYG00000013593	-1.51704	7.3661e-05	e2f8	E2F transcription factor 8 [Source:ZFIN;Acc:ZDB-GENE-041111-260]	e2f4	Bilateria	DOWN
ENSOMYG00000013613	-1.7803	0.00011945	LSS	lanosterol synthase [Source:HGNC Symbol;Acc:HGNC:6708]	NA	NA	DOWN
ENSOMYG00000013729	-1.50952	0.0284326	NA	NA	NA	Euteleostomi	DOWN
ENSOMYG00000013906	4.59354	0.000128717	si:ch73-261i21.5	si:ch73-261i21.5 [Source:ZFIN;Acc:ZDB-GENE-110411-258]	NA	Neopterygii	UP
ENSOMYG00000013906	4.59354	0.000128717	si:ch73-261i21.5	si:ch73-261i21.5 [Source:ZFIN;Acc:ZDB-GENE-110411-258]	NA	Euteleostomi	UP
ENSOMYG00000013906	4.59354	0.000128717	si:ch73-261i21.5	si:ch73-261i21.5 [Source:ZFIN;Acc:ZDB-GENE-110411-258]	NA	Chordata	UP
ENSOMYG00000013906	4.59354	0.000128717	si:ch73-261i21.5	si:ch73-261i21.5 [Source:ZFIN;Acc:ZDB-GENE-110411-258]	tectb	Chordata	UP
ENSOMYG00000013906	4.59354	0.000128717	si:ch73-261i21.5	si:ch73-261i21.5 [Source:ZFIN;Acc:ZDB-GENE-110411-258]	vwde	Chordata	UP
ENSOMYG00000013906	4.59354	0.000128717	si:ch73-261i21.5	si:ch73-261i21.5 [Source:ZFIN;Acc:ZDB-GENE-110411-258]	cuzd1.2	Chordata	UP
ENSOMYG00000013906	4.59354	0.000128717	si:ch73-261i21.5	si:ch73-261i21.5 [Source:ZFIN;Acc:ZDB-GENE-110411-258]	OIT3	Chordata	UP
ENSOMYG00000013906	4.59354	0.000128717	si:ch73-261i21.5	si:ch73-261i21.5 [Source:ZFIN;Acc:ZDB-GENE-110411-258]	si:dkey-103g5.3	Chordata	UP
ENSOMYG00000013906	4.59354	0.000128717	si:ch73-261i21.5	si:ch73-261i21.5 [Source:ZFIN;Acc:ZDB-GENE-110411-258]	umodl1	Chordata	UP
ENSOMYG00000013943	-1.13891	0.039342	ppdpfa	pancreatic progenitor cell differentiation and proliferation factor a [Source:ZFIN;Acc:ZDB-GENE-030219-204]	ppdpfa	Salmoninae	DOWN
ENSOMYG00000014198	1.36738	0.0262046	mindy3	MINDY lysine 48 deubiquitinase 3 [Source:ZFIN;Acc:ZDB-GENE-061110-13]	mindy4	Bilateria	UP
ENSOMYG00000014198	1.36738	0.0262046	mindy3	MINDY lysine 48 deubiquitinase 3 [Source:ZFIN;Acc:ZDB-GENE-061110-13]	MINDY4B	Bilateria	UP
ENSOMYG00000014198	1.36738	0.0262046	mindy3	MINDY lysine 48 deubiquitinase 3 [Source:ZFIN;Acc:ZDB-GENE-061110-13]	mindy3	Salmoninae	UP
ENSOMYG00000014212	3.01244	0.00226687	NA	NA	NA	Salmoninae	UP
ENSOMYG00000014212	3.01244	0.00226687	NA	NA	APP	Clupeocephala	UP
ENSOMYG00000014212	3.01244	0.00226687	NA	NA	aplp1	Gnathostomata	UP
ENSOMYG00000014212	3.01244	0.00226687	NA	NA	NA	Gnathostomata	UP
ENSOMYG00000014255	-1.71608	0.00163132	NA	NA	itga4	Bilateria	DOWN
ENSOMYG00000014255	-1.71608	0.00163132	NA	NA	NA	Bilateria	DOWN
ENSOMYG00000014255	-1.71608	0.00163132	NA	NA	ITGA10	Bilateria	DOWN
ENSOMYG00000014255	-1.71608	0.00163132	NA	NA	itgav	Bilateria	DOWN
ENSOMYG00000014255	-1.71608	0.00163132	NA	NA	ITGA7	Bilateria	DOWN
ENSOMYG00000014255	-1.71608	0.00163132	NA	NA	itga2b	Bilateria	DOWN
ENSOMYG00000014255	-1.71608	0.00163132	NA	NA	itga8	Bilateria	DOWN
ENSOMYG00000014255	-1.71608	0.00163132	NA	NA	itga9	Bilateria	DOWN
ENSOMYG00000014255	-1.71608	0.00163132	NA	NA	itga3b	Bilateria	DOWN
ENSOMYG00000014255	-1.71608	0.00163132	NA	NA	ITGA1	Bilateria	DOWN
ENSOMYG00000014255	-1.71608	0.00163132	NA	NA	itga11a	Bilateria	DOWN
ENSOMYG00000014255	-1.71608	0.00163132	NA	NA	ITGA11	Bilateria	DOWN
ENSOMYG00000014255	-1.71608	0.00163132	NA	NA	itga5	Bilateria	DOWN
ENSOMYG00000014255	-1.71608	0.00163132	NA	NA	ITGA2	Bilateria	DOWN
ENSOMYG00000014255	-1.71608	0.00163132	NA	NA	ITGA6	Bilateria	DOWN
ENSOMYG00000014255	-1.71608	0.00163132	NA	NA	itga6b	Bilateria	DOWN
ENSOMYG00000014370	-1.43759	0.0201766	chrm2a	cholinergic receptor, muscarinic 2a [Source:ZFIN;Acc:ZDB-GENE-030314-1]	chrm2a	Salmoninae	DOWN
ENSOMYG00000014370	-1.43759	0.0201766	chrm2a	cholinergic receptor, muscarinic 2a [Source:ZFIN;Acc:ZDB-GENE-030314-1]	NA	Osteoglossocephalai	DOWN
ENSOMYG00000014370	-1.43759	0.0201766	chrm2a	cholinergic receptor, muscarinic 2a [Source:ZFIN;Acc:ZDB-GENE-030314-1]	NA	Bilateria	DOWN
ENSOMYG00000014370	-1.43759	0.0201766	chrm2a	cholinergic receptor, muscarinic 2a [Source:ZFIN;Acc:ZDB-GENE-030314-1]	HRH1	Bilateria	DOWN
ENSOMYG00000014370	-1.43759	0.0201766	chrm2a	cholinergic receptor, muscarinic 2a [Source:ZFIN;Acc:ZDB-GENE-030314-1]	chrm4b	Bilateria	DOWN
ENSOMYG00000014370	-1.43759	0.0201766	chrm2a	cholinergic receptor, muscarinic 2a [Source:ZFIN;Acc:ZDB-GENE-030314-1]	chrm4a	Bilateria	DOWN
ENSOMYG00000014370	-1.43759	0.0201766	chrm2a	cholinergic receptor, muscarinic 2a [Source:ZFIN;Acc:ZDB-GENE-030314-1]	TAAR5	Bilateria	DOWN
ENSOMYG00000014370	-1.43759	0.0201766	chrm2a	cholinergic receptor, muscarinic 2a [Source:ZFIN;Acc:ZDB-GENE-030314-1]	GPR21	Bilateria	DOWN
ENSOMYG00000014370	-1.43759	0.0201766	chrm2a	cholinergic receptor, muscarinic 2a [Source:ZFIN;Acc:ZDB-GENE-030314-1]	chrm5b	Bilateria	DOWN
ENSOMYG00000014370	-1.43759	0.0201766	chrm2a	cholinergic receptor, muscarinic 2a [Source:ZFIN;Acc:ZDB-GENE-030314-1]	CHRM5	Bilateria	DOWN
ENSOMYG00000014370	-1.43759	0.0201766	chrm2a	cholinergic receptor, muscarinic 2a [Source:ZFIN;Acc:ZDB-GENE-030314-1]	chrm3a	Bilateria	DOWN
ENSOMYG00000014370	-1.43759	0.0201766	chrm2a	cholinergic receptor, muscarinic 2a [Source:ZFIN;Acc:ZDB-GENE-030314-1]	chrm3b	Bilateria	DOWN
ENSOMYG00000014370	-1.43759	0.0201766	chrm2a	cholinergic receptor, muscarinic 2a [Source:ZFIN;Acc:ZDB-GENE-030314-1]	htr1ab	Bilateria	DOWN
ENSOMYG00000014370	-1.43759	0.0201766	chrm2a	cholinergic receptor, muscarinic 2a [Source:ZFIN;Acc:ZDB-GENE-030314-1]	zgc:162592	Bilateria	DOWN
ENSOMYG00000014370	-1.43759	0.0201766	chrm2a	cholinergic receptor, muscarinic 2a [Source:ZFIN;Acc:ZDB-GENE-030314-1]	drd3	Bilateria	DOWN
ENSOMYG00000014370	-1.43759	0.0201766	chrm2a	cholinergic receptor, muscarinic 2a [Source:ZFIN;Acc:ZDB-GENE-030314-1]	hrh3	Bilateria	DOWN
ENSOMYG00000014370	-1.43759	0.0201766	chrm2a	cholinergic receptor, muscarinic 2a [Source:ZFIN;Acc:ZDB-GENE-030314-1]	TAAR1	Bilateria	DOWN
ENSOMYG00000014370	-1.43759	0.0201766	chrm2a	cholinergic receptor, muscarinic 2a [Source:ZFIN;Acc:ZDB-GENE-030314-1]	drd1b	Bilateria	DOWN
ENSOMYG00000014370	-1.43759	0.0201766	chrm2a	cholinergic receptor, muscarinic 2a [Source:ZFIN;Acc:ZDB-GENE-030314-1]	DRD1	Bilateria	DOWN
ENSOMYG00000014370	-1.43759	0.0201766	chrm2a	cholinergic receptor, muscarinic 2a [Source:ZFIN;Acc:ZDB-GENE-030314-1]	drd6b	Bilateria	DOWN
ENSOMYG00000014370	-1.43759	0.0201766	chrm2a	cholinergic receptor, muscarinic 2a [Source:ZFIN;Acc:ZDB-GENE-030314-1]	DRD5	Bilateria	DOWN
ENSOMYG00000014370	-1.43759	0.0201766	chrm2a	cholinergic receptor, muscarinic 2a [Source:ZFIN;Acc:ZDB-GENE-030314-1]	si:dkey-247m21.3	Bilateria	DOWN
ENSOMYG00000014521	-1.23095	0.0302663	NA	NA	ighmbp2	Opisthokonta	DOWN
ENSOMYG00000014521	-1.23095	0.0302663	NA	NA	upf1	Opisthokonta	DOWN
ENSOMYG00000014521	-1.23095	0.0302663	NA	NA	NA	Opisthokonta	DOWN
ENSOMYG00000014521	-1.23095	0.0302663	NA	NA	HELZ	Opisthokonta	DOWN
ENSOMYG00000014521	-1.23095	0.0302663	NA	NA	mov10a	Opisthokonta	DOWN
ENSOMYG00000014521	-1.23095	0.0302663	NA	NA	aqr	Opisthokonta	DOWN
ENSOMYG00000014521	-1.23095	0.0302663	NA	NA	SETX	Opisthokonta	DOWN
ENSOMYG00000014626	1.04765	0.0153814	map3k14a	mitogen-activated protein kinase kinase kinase 14a [Source:ZFIN;Acc:ZDB-GENE-120215-80]	NA	Opisthokonta	UP
ENSOMYG00000014626	1.04765	0.0153814	map3k14a	mitogen-activated protein kinase kinase kinase 14a [Source:ZFIN;Acc:ZDB-GENE-120215-80]	pak4	Opisthokonta	UP
ENSOMYG00000014626	1.04765	0.0153814	map3k14a	mitogen-activated protein kinase kinase kinase 14a [Source:ZFIN;Acc:ZDB-GENE-120215-80]	mink1	Opisthokonta	UP
ENSOMYG00000014626	1.04765	0.0153814	map3k14a	mitogen-activated protein kinase kinase kinase 14a [Source:ZFIN;Acc:ZDB-GENE-120215-80]	tnika	Opisthokonta	UP
ENSOMYG00000014626	1.04765	0.0153814	map3k14a	mitogen-activated protein kinase kinase kinase 14a [Source:ZFIN;Acc:ZDB-GENE-120215-80]	TNIK	Opisthokonta	UP
ENSOMYG00000014626	1.04765	0.0153814	map3k14a	mitogen-activated protein kinase kinase kinase 14a [Source:ZFIN;Acc:ZDB-GENE-120215-80]	PAK5	Opisthokonta	UP
ENSOMYG00000014626	1.04765	0.0153814	map3k14a	mitogen-activated protein kinase kinase kinase 14a [Source:ZFIN;Acc:ZDB-GENE-120215-80]	stk3	Opisthokonta	UP
ENSOMYG00000014626	1.04765	0.0153814	map3k14a	mitogen-activated protein kinase kinase kinase 14a [Source:ZFIN;Acc:ZDB-GENE-120215-80]	MAP3K1	Opisthokonta	UP
ENSOMYG00000014626	1.04765	0.0153814	map3k14a	mitogen-activated protein kinase kinase kinase 14a [Source:ZFIN;Acc:ZDB-GENE-120215-80]	STK39	Opisthokonta	UP
ENSOMYG00000014626	1.04765	0.0153814	map3k14a	mitogen-activated protein kinase kinase kinase 14a [Source:ZFIN;Acc:ZDB-GENE-120215-80]	oxsr1a	Opisthokonta	UP
ENSOMYG00000014626	1.04765	0.0153814	map3k14a	mitogen-activated protein kinase kinase kinase 14a [Source:ZFIN;Acc:ZDB-GENE-120215-80]	pak2b	Opisthokonta	UP
ENSOMYG00000014626	1.04765	0.0153814	map3k14a	mitogen-activated protein kinase kinase kinase 14a [Source:ZFIN;Acc:ZDB-GENE-120215-80]	pak1	Opisthokonta	UP
ENSOMYG00000014626	1.04765	0.0153814	map3k14a	mitogen-activated protein kinase kinase kinase 14a [Source:ZFIN;Acc:ZDB-GENE-120215-80]	taok1a	Opisthokonta	UP
ENSOMYG00000014626	1.04765	0.0153814	map3k14a	mitogen-activated protein kinase kinase kinase 14a [Source:ZFIN;Acc:ZDB-GENE-120215-80]	taok1b	Opisthokonta	UP
ENSOMYG00000014626	1.04765	0.0153814	map3k14a	mitogen-activated protein kinase kinase kinase 14a [Source:ZFIN;Acc:ZDB-GENE-120215-80]	nek4	Opisthokonta	UP
ENSOMYG00000014626	1.04765	0.0153814	map3k14a	mitogen-activated protein kinase kinase kinase 14a [Source:ZFIN;Acc:ZDB-GENE-120215-80]	map4k5	Opisthokonta	UP
ENSOMYG00000014626	1.04765	0.0153814	map3k14a	mitogen-activated protein kinase kinase kinase 14a [Source:ZFIN;Acc:ZDB-GENE-120215-80]	strada	Opisthokonta	UP
ENSOMYG00000014626	1.04765	0.0153814	map3k14a	mitogen-activated protein kinase kinase kinase 14a [Source:ZFIN;Acc:ZDB-GENE-120215-80]	map2k6	Opisthokonta	UP
ENSOMYG00000014626	1.04765	0.0153814	map3k14a	mitogen-activated protein kinase kinase kinase 14a [Source:ZFIN;Acc:ZDB-GENE-120215-80]	si:dkey-8e10.3	Opisthokonta	UP
ENSOMYG00000014626	1.04765	0.0153814	map3k14a	mitogen-activated protein kinase kinase kinase 14a [Source:ZFIN;Acc:ZDB-GENE-120215-80]	si:ch211-171h4.3	Opisthokonta	UP
ENSOMYG00000014626	1.04765	0.0153814	map3k14a	mitogen-activated protein kinase kinase kinase 14a [Source:ZFIN;Acc:ZDB-GENE-120215-80]	map4k3a	Opisthokonta	UP
ENSOMYG00000014626	1.04765	0.0153814	map3k14a	mitogen-activated protein kinase kinase kinase 14a [Source:ZFIN;Acc:ZDB-GENE-120215-80]	MAP4K3	Opisthokonta	UP
ENSOMYG00000014626	1.04765	0.0153814	map3k14a	mitogen-activated protein kinase kinase kinase 14a [Source:ZFIN;Acc:ZDB-GENE-120215-80]	SLK	Opisthokonta	UP
ENSOMYG00000014626	1.04765	0.0153814	map3k14a	mitogen-activated protein kinase kinase kinase 14a [Source:ZFIN;Acc:ZDB-GENE-120215-80]	TAOK3	Opisthokonta	UP
ENSOMYG00000014626	1.04765	0.0153814	map3k14a	mitogen-activated protein kinase kinase kinase 14a [Source:ZFIN;Acc:ZDB-GENE-120215-80]	taok3a	Opisthokonta	UP
ENSOMYG00000014626	1.04765	0.0153814	map3k14a	mitogen-activated protein kinase kinase kinase 14a [Source:ZFIN;Acc:ZDB-GENE-120215-80]	stradb	Opisthokonta	UP
ENSOMYG00000014626	1.04765	0.0153814	map3k14a	mitogen-activated protein kinase kinase kinase 14a [Source:ZFIN;Acc:ZDB-GENE-120215-80]	taok2a	Opisthokonta	UP
ENSOMYG00000014626	1.04765	0.0153814	map3k14a	mitogen-activated protein kinase kinase kinase 14a [Source:ZFIN;Acc:ZDB-GENE-120215-80]	stk25b	Opisthokonta	UP
ENSOMYG00000014626	1.04765	0.0153814	map3k14a	mitogen-activated protein kinase kinase kinase 14a [Source:ZFIN;Acc:ZDB-GENE-120215-80]	stk24a	Opisthokonta	UP
ENSOMYG00000014626	1.04765	0.0153814	map3k14a	mitogen-activated protein kinase kinase kinase 14a [Source:ZFIN;Acc:ZDB-GENE-120215-80]	map3k8	Opisthokonta	UP
ENSOMYG00000014626	1.04765	0.0153814	map3k14a	mitogen-activated protein kinase kinase kinase 14a [Source:ZFIN;Acc:ZDB-GENE-120215-80]	map4k2	Opisthokonta	UP
ENSOMYG00000014626	1.04765	0.0153814	map3k14a	mitogen-activated protein kinase kinase kinase 14a [Source:ZFIN;Acc:ZDB-GENE-120215-80]	stk10	Opisthokonta	UP
ENSOMYG00000014626	1.04765	0.0153814	map3k14a	mitogen-activated protein kinase kinase kinase 14a [Source:ZFIN;Acc:ZDB-GENE-120215-80]	pak6a	Opisthokonta	UP
ENSOMYG00000014626	1.04765	0.0153814	map3k14a	mitogen-activated protein kinase kinase kinase 14a [Source:ZFIN;Acc:ZDB-GENE-120215-80]	sbk3	Opisthokonta	UP
ENSOMYG00000014626	1.04765	0.0153814	map3k14a	mitogen-activated protein kinase kinase kinase 14a [Source:ZFIN;Acc:ZDB-GENE-120215-80]	map3k14a	Salmoninae	UP
ENSOMYG00000014626	1.04765	0.0153814	map3k14a	mitogen-activated protein kinase kinase kinase 14a [Source:ZFIN;Acc:ZDB-GENE-120215-80]	arf2b	Gnathostomata	UP
ENSOMYG00000014709	3.13644	0.00831741	RGS2	regulator of G protein signaling 2 [Source:HGNC Symbol;Acc:HGNC:9998]	rgs2	Salmoninae	UP
ENSOMYG00000014709	3.13644	0.00831741	RGS2	regulator of G protein signaling 2 [Source:HGNC Symbol;Acc:HGNC:9998]	NA	Osteoglossocephalai	UP
ENSOMYG00000014709	3.13644	0.00831741	RGS2	regulator of G protein signaling 2 [Source:HGNC Symbol;Acc:HGNC:9998]	rgs9a	Bilateria	UP
ENSOMYG00000014709	3.13644	0.00831741	RGS2	regulator of G protein signaling 2 [Source:HGNC Symbol;Acc:HGNC:9998]	NA	Bilateria	UP
ENSOMYG00000014709	3.13644	0.00831741	RGS2	regulator of G protein signaling 2 [Source:HGNC Symbol;Acc:HGNC:9998]	rgs8	Bilateria	UP
ENSOMYG00000014709	3.13644	0.00831741	RGS2	regulator of G protein signaling 2 [Source:HGNC Symbol;Acc:HGNC:9998]	rgs18	Bilateria	UP
ENSOMYG00000014709	3.13644	0.00831741	RGS2	regulator of G protein signaling 2 [Source:HGNC Symbol;Acc:HGNC:9998]	rgs5a	Bilateria	UP
ENSOMYG00000014709	3.13644	0.00831741	RGS2	regulator of G protein signaling 2 [Source:HGNC Symbol;Acc:HGNC:9998]	rgs13a	Bilateria	UP
ENSOMYG00000014709	3.13644	0.00831741	RGS2	regulator of G protein signaling 2 [Source:HGNC Symbol;Acc:HGNC:9998]	rgs13b	Bilateria	UP
ENSOMYG00000014709	3.13644	0.00831741	RGS2	regulator of G protein signaling 2 [Source:HGNC Symbol;Acc:HGNC:9998]	rgs1	Bilateria	UP
ENSOMYG00000014709	3.13644	0.00831741	RGS2	regulator of G protein signaling 2 [Source:HGNC Symbol;Acc:HGNC:9998]	rgs4	Bilateria	UP
ENSOMYG00000014709	3.13644	0.00831741	RGS2	regulator of G protein signaling 2 [Source:HGNC Symbol;Acc:HGNC:9998]	RGS20	Bilateria	UP
ENSOMYG00000014709	3.13644	0.00831741	RGS2	regulator of G protein signaling 2 [Source:HGNC Symbol;Acc:HGNC:9998]	rgs20	Bilateria	UP
ENSOMYG00000014709	3.13644	0.00831741	RGS2	regulator of G protein signaling 2 [Source:HGNC Symbol;Acc:HGNC:9998]	rgs5b	Bilateria	UP
ENSOMYG00000014709	3.13644	0.00831741	RGS2	regulator of G protein signaling 2 [Source:HGNC Symbol;Acc:HGNC:9998]	rgs16	Bilateria	UP
ENSOMYG00000014709	3.13644	0.00831741	RGS2	regulator of G protein signaling 2 [Source:HGNC Symbol;Acc:HGNC:9998]	rgs6	Bilateria	UP
ENSOMYG00000014709	3.13644	0.00831741	RGS2	regulator of G protein signaling 2 [Source:HGNC Symbol;Acc:HGNC:9998]	RGS6	Bilateria	UP
ENSOMYG00000014709	3.13644	0.00831741	RGS2	regulator of G protein signaling 2 [Source:HGNC Symbol;Acc:HGNC:9998]	RGS22	Bilateria	UP
ENSOMYG00000014709	3.13644	0.00831741	RGS2	regulator of G protein signaling 2 [Source:HGNC Symbol;Acc:HGNC:9998]	rgs11	Bilateria	UP
ENSOMYG00000014709	3.13644	0.00831741	RGS2	regulator of G protein signaling 2 [Source:HGNC Symbol;Acc:HGNC:9998]	rgs14a	Bilateria	UP
ENSOMYG00000014709	3.13644	0.00831741	RGS2	regulator of G protein signaling 2 [Source:HGNC Symbol;Acc:HGNC:9998]	rgs17	Bilateria	UP
ENSOMYG00000014709	3.13644	0.00831741	RGS2	regulator of G protein signaling 2 [Source:HGNC Symbol;Acc:HGNC:9998]	axin1	Bilateria	UP
ENSOMYG00000014709	3.13644	0.00831741	RGS2	regulator of G protein signaling 2 [Source:HGNC Symbol;Acc:HGNC:9998]	axin2	Bilateria	UP
ENSOMYG00000014709	3.13644	0.00831741	RGS2	regulator of G protein signaling 2 [Source:HGNC Symbol;Acc:HGNC:9998]	AXIN2	Bilateria	UP
ENSOMYG00000014709	3.13644	0.00831741	RGS2	regulator of G protein signaling 2 [Source:HGNC Symbol;Acc:HGNC:9998]	RGS1	Bilateria	UP
ENSOMYG00000014709	3.13644	0.00831741	RGS2	regulator of G protein signaling 2 [Source:HGNC Symbol;Acc:HGNC:9998]	RGS7	Bilateria	UP
ENSOMYG00000014709	3.13644	0.00831741	RGS2	regulator of G protein signaling 2 [Source:HGNC Symbol;Acc:HGNC:9998]	rgs7a	Bilateria	UP
ENSOMYG00000014709	3.13644	0.00831741	RGS2	regulator of G protein signaling 2 [Source:HGNC Symbol;Acc:HGNC:9998]	rgs12b	Bilateria	UP
ENSOMYG00000014781	2.28529	0.00115094	pnp5a	purine nucleoside phosphorylase 5a [Source:ZFIN;Acc:ZDB-GENE-040426-2553]	pnp5a	Salmoninae	UP
ENSOMYG00000014781	2.28529	0.00115094	pnp5a	purine nucleoside phosphorylase 5a [Source:ZFIN;Acc:ZDB-GENE-040426-2553]	NA	Clupeocephala	UP
ENSOMYG00000014781	2.28529	0.00115094	pnp5a	purine nucleoside phosphorylase 5a [Source:ZFIN;Acc:ZDB-GENE-040426-2553]	pnp4b	Vertebrata	UP
ENSOMYG00000014781	2.28529	0.00115094	pnp5a	purine nucleoside phosphorylase 5a [Source:ZFIN;Acc:ZDB-GENE-040426-2553]	pnp6	Vertebrata	UP
ENSOMYG00000014781	2.28529	0.00115094	pnp5a	purine nucleoside phosphorylase 5a [Source:ZFIN;Acc:ZDB-GENE-040426-2553]	NA	Vertebrata	UP
ENSOMYG00000014781	2.28529	0.00115094	pnp5a	purine nucleoside phosphorylase 5a [Source:ZFIN;Acc:ZDB-GENE-040426-2553]	pnp4a	Vertebrata	UP
ENSOMYG00000014781	2.28529	0.00115094	pnp5a	purine nucleoside phosphorylase 5a [Source:ZFIN;Acc:ZDB-GENE-040426-2553]	mtap	Opisthokonta	UP
ENSOMYG00000014815	-1.23423	0.016254	NA	NA	NA	Salmoninae	DOWN
ENSOMYG00000014815	-1.23423	0.016254	NA	NA	NA	Neopterygii	DOWN
ENSOMYG00000014891	1.34523	0.0348007	brdt	bromodomain, testis-specific [Source:ZFIN;Acc:ZDB-GENE-030131-5928]	brdt	Salmoninae	UP
ENSOMYG00000014891	1.34523	0.0348007	brdt	bromodomain, testis-specific [Source:ZFIN;Acc:ZDB-GENE-030131-5928]	BAZ2B	Opisthokonta	UP
ENSOMYG00000014891	1.34523	0.0348007	brdt	bromodomain, testis-specific [Source:ZFIN;Acc:ZDB-GENE-030131-5928]	baz1b	Opisthokonta	UP
ENSOMYG00000014891	1.34523	0.0348007	brdt	bromodomain, testis-specific [Source:ZFIN;Acc:ZDB-GENE-030131-5928]	NA	Opisthokonta	UP
ENSOMYG00000014891	1.34523	0.0348007	brdt	bromodomain, testis-specific [Source:ZFIN;Acc:ZDB-GENE-030131-5928]	kat2a	Opisthokonta	UP
ENSOMYG00000014891	1.34523	0.0348007	brdt	bromodomain, testis-specific [Source:ZFIN;Acc:ZDB-GENE-030131-5928]	brd3b	Opisthokonta	UP
ENSOMYG00000014891	1.34523	0.0348007	brdt	bromodomain, testis-specific [Source:ZFIN;Acc:ZDB-GENE-030131-5928]	bptf	Opisthokonta	UP
ENSOMYG00000014891	1.34523	0.0348007	brdt	bromodomain, testis-specific [Source:ZFIN;Acc:ZDB-GENE-030131-5928]	BAZ1A	Opisthokonta	UP
ENSOMYG00000014891	1.34523	0.0348007	brdt	bromodomain, testis-specific [Source:ZFIN;Acc:ZDB-GENE-030131-5928]	brd2a	Opisthokonta	UP
ENSOMYG00000014891	1.34523	0.0348007	brdt	bromodomain, testis-specific [Source:ZFIN;Acc:ZDB-GENE-030131-5928]	kat2b	Opisthokonta	UP
ENSOMYG00000014891	1.34523	0.0348007	brdt	bromodomain, testis-specific [Source:ZFIN;Acc:ZDB-GENE-030131-5928]	baz2a	Opisthokonta	UP
ENSOMYG00000014971	1.98551	0.0439642	marveld2b	MARVEL domain containing 2b [Source:ZFIN;Acc:ZDB-GENE-050208-54]	NA	Salmoninae	UP
ENSOMYG00000014971	1.98551	0.0439642	marveld2b	MARVEL domain containing 2b [Source:ZFIN;Acc:ZDB-GENE-050208-54]	NA	Osteoglossocephalai	UP
ENSOMYG00000014971	1.98551	0.0439642	marveld2b	MARVEL domain containing 2b [Source:ZFIN;Acc:ZDB-GENE-050208-54]	NA	Bilateria	UP
ENSOMYG00000014971	1.98551	0.0439642	marveld2b	MARVEL domain containing 2b [Source:ZFIN;Acc:ZDB-GENE-050208-54]	oclnb	Bilateria	UP
ENSOMYG00000014971	1.98551	0.0439642	marveld2b	MARVEL domain containing 2b [Source:ZFIN;Acc:ZDB-GENE-050208-54]	ell	Bilateria	UP
ENSOMYG00000014971	1.98551	0.0439642	marveld2b	MARVEL domain containing 2b [Source:ZFIN;Acc:ZDB-GENE-050208-54]	zgc:154006	Bilateria	UP
ENSOMYG00000014971	1.98551	0.0439642	marveld2b	MARVEL domain containing 2b [Source:ZFIN;Acc:ZDB-GENE-050208-54]	marveld2l	Bilateria	UP
ENSOMYG00000014971	1.98551	0.0439642	marveld2b	MARVEL domain containing 2b [Source:ZFIN;Acc:ZDB-GENE-050208-54]	ell2	Bilateria	UP
ENSOMYG00000015092	-1.26542	0.00187033	cdkn3	cyclin dependent kinase inhibitor 3 [Source:ZFIN;Acc:ZDB-GENE-060427-2]	NA	Opisthokonta	DOWN
ENSOMYG00000015092	-1.26542	0.00187033	cdkn3	cyclin dependent kinase inhibitor 3 [Source:ZFIN;Acc:ZDB-GENE-060427-2]	cdc14ab	Opisthokonta	DOWN
ENSOMYG00000015092	-1.26542	0.00187033	cdkn3	cyclin dependent kinase inhibitor 3 [Source:ZFIN;Acc:ZDB-GENE-060427-2]	ptp4a2a	Opisthokonta	DOWN
ENSOMYG00000015092	-1.26542	0.00187033	cdkn3	cyclin dependent kinase inhibitor 3 [Source:ZFIN;Acc:ZDB-GENE-060427-2]	ptp4a2b	Opisthokonta	DOWN
ENSOMYG00000015092	-1.26542	0.00187033	cdkn3	cyclin dependent kinase inhibitor 3 [Source:ZFIN;Acc:ZDB-GENE-060427-2]	ptp4a1	Opisthokonta	DOWN
ENSOMYG00000015092	-1.26542	0.00187033	cdkn3	cyclin dependent kinase inhibitor 3 [Source:ZFIN;Acc:ZDB-GENE-060427-2]	pald1a	Opisthokonta	DOWN
ENSOMYG00000015092	-1.26542	0.00187033	cdkn3	cyclin dependent kinase inhibitor 3 [Source:ZFIN;Acc:ZDB-GENE-060427-2]	ptpdc1b	Opisthokonta	DOWN
ENSOMYG00000015092	-1.26542	0.00187033	cdkn3	cyclin dependent kinase inhibitor 3 [Source:ZFIN;Acc:ZDB-GENE-060427-2]	ptpdc1a	Opisthokonta	DOWN
ENSOMYG00000015092	-1.26542	0.00187033	cdkn3	cyclin dependent kinase inhibitor 3 [Source:ZFIN;Acc:ZDB-GENE-060427-2]	ptp4a3b	Opisthokonta	DOWN
ENSOMYG00000015144	-1.95625	0.00692652	NA	NA	NA	NA	DOWN
ENSOMYG00000015242	1.17747	0.0321943	NA	NA	NA	Bilateria	UP
ENSOMYG00000015242	1.17747	0.0321943	NA	NA	NA	Protacanthopterygii	UP
ENSOMYG00000015242	1.17747	0.0321943	NA	NA	NA	Euteleostomi	UP
ENSOMYG00000015242	1.17747	0.0321943	NA	NA	NA	Vertebrata	UP
ENSOMYG00000015242	1.17747	0.0321943	NA	NA	prdm5	Bilateria	UP
ENSOMYG00000015307	1.83534	0.0223778	mknk2b	MAPK interacting serine/threonine kinase 2b [Source:ZFIN;Acc:ZDB-GENE-030829-2]	mknk2b	Salmoninae	UP
ENSOMYG00000015307	1.83534	0.0223778	mknk2b	MAPK interacting serine/threonine kinase 2b [Source:ZFIN;Acc:ZDB-GENE-030829-2]	mknk2a	Clupeocephala	UP
ENSOMYG00000015307	1.83534	0.0223778	mknk2b	MAPK interacting serine/threonine kinase 2b [Source:ZFIN;Acc:ZDB-GENE-030829-2]	mknk1	Vertebrata	UP
ENSOMYG00000015307	1.83534	0.0223778	mknk2b	MAPK interacting serine/threonine kinase 2b [Source:ZFIN;Acc:ZDB-GENE-030829-2]	NA	Opisthokonta	UP
ENSOMYG00000015307	1.83534	0.0223778	mknk2b	MAPK interacting serine/threonine kinase 2b [Source:ZFIN;Acc:ZDB-GENE-030829-2]	mapkapk2b	Opisthokonta	UP
ENSOMYG00000015307	1.83534	0.0223778	mknk2b	MAPK interacting serine/threonine kinase 2b [Source:ZFIN;Acc:ZDB-GENE-030829-2]	si:ch73-60h1.1	Opisthokonta	UP
ENSOMYG00000015307	1.83534	0.0223778	mknk2b	MAPK interacting serine/threonine kinase 2b [Source:ZFIN;Acc:ZDB-GENE-030829-2]	mapkapk3	Opisthokonta	UP
ENSOMYG00000015307	1.83534	0.0223778	mknk2b	MAPK interacting serine/threonine kinase 2b [Source:ZFIN;Acc:ZDB-GENE-030829-2]	camk4	Opisthokonta	UP
ENSOMYG00000015429	1.07874	0.0127756	grinaa	glutamate receptor, ionotropic, N-methyl D-aspartate-associated protein 1a (glutamate binding) [Source:ZFIN;Acc:ZDB-GENE-060616-231]	NA	Opisthokonta	UP
ENSOMYG00000015429	1.07874	0.0127756	grinaa	glutamate receptor, ionotropic, N-methyl D-aspartate-associated protein 1a (glutamate binding) [Source:ZFIN;Acc:ZDB-GENE-060616-231]	tmbim4	Opisthokonta	UP
ENSOMYG00000015429	1.07874	0.0127756	grinaa	glutamate receptor, ionotropic, N-methyl D-aspartate-associated protein 1a (glutamate binding) [Source:ZFIN;Acc:ZDB-GENE-060616-231]	ghitm	Opisthokonta	UP
ENSOMYG00000015429	1.07874	0.0127756	grinaa	glutamate receptor, ionotropic, N-methyl D-aspartate-associated protein 1a (glutamate binding) [Source:ZFIN;Acc:ZDB-GENE-060616-231]	grinaa	Salmoninae	UP
ENSOMYG00000015429	1.07874	0.0127756	grinaa	glutamate receptor, ionotropic, N-methyl D-aspartate-associated protein 1a (glutamate binding) [Source:ZFIN;Acc:ZDB-GENE-060616-231]	grinab	Euteleostomi	UP
ENSOMYG00000015429	1.07874	0.0127756	grinaa	glutamate receptor, ionotropic, N-methyl D-aspartate-associated protein 1a (glutamate binding) [Source:ZFIN;Acc:ZDB-GENE-060616-231]	si:ch211-284o19.8	Vertebrata	UP
ENSOMYG00000015429	1.07874	0.0127756	grinaa	glutamate receptor, ionotropic, N-methyl D-aspartate-associated protein 1a (glutamate binding) [Source:ZFIN;Acc:ZDB-GENE-060616-231]	NA	Vertebrata	UP
ENSOMYG00000015429	1.07874	0.0127756	grinaa	glutamate receptor, ionotropic, N-methyl D-aspartate-associated protein 1a (glutamate binding) [Source:ZFIN;Acc:ZDB-GENE-060616-231]	tmbim1a	Vertebrata	UP
ENSOMYG00000015429	1.07874	0.0127756	grinaa	glutamate receptor, ionotropic, N-methyl D-aspartate-associated protein 1a (glutamate binding) [Source:ZFIN;Acc:ZDB-GENE-060616-231]	faim2b	Vertebrata	UP
ENSOMYG00000015500	-1.2686	0.0154702	NA	NA	itga4	Osteoglossocephalai	DOWN
ENSOMYG00000015500	-1.2686	0.0154702	NA	NA	ITGA10	Bilateria	DOWN
ENSOMYG00000015500	-1.2686	0.0154702	NA	NA	NA	Bilateria	DOWN
ENSOMYG00000015500	-1.2686	0.0154702	NA	NA	itgav	Bilateria	DOWN
ENSOMYG00000015500	-1.2686	0.0154702	NA	NA	ITGA7	Bilateria	DOWN
ENSOMYG00000015500	-1.2686	0.0154702	NA	NA	itga2b	Bilateria	DOWN
ENSOMYG00000015500	-1.2686	0.0154702	NA	NA	itga8	Bilateria	DOWN
ENSOMYG00000015500	-1.2686	0.0154702	NA	NA	itga9	Bilateria	DOWN
ENSOMYG00000015500	-1.2686	0.0154702	NA	NA	itga3b	Bilateria	DOWN
ENSOMYG00000015500	-1.2686	0.0154702	NA	NA	ITGA1	Bilateria	DOWN
ENSOMYG00000015500	-1.2686	0.0154702	NA	NA	itga11a	Bilateria	DOWN
ENSOMYG00000015500	-1.2686	0.0154702	NA	NA	ITGA11	Bilateria	DOWN
ENSOMYG00000015500	-1.2686	0.0154702	NA	NA	itga5	Bilateria	DOWN
ENSOMYG00000015500	-1.2686	0.0154702	NA	NA	ITGA2	Bilateria	DOWN
ENSOMYG00000015500	-1.2686	0.0154702	NA	NA	ITGA6	Bilateria	DOWN
ENSOMYG00000015500	-1.2686	0.0154702	NA	NA	itga6b	Bilateria	DOWN
ENSOMYG00000015682	1.15036	0.0494599	NA	NA	NA	Salmoninae	UP
ENSOMYG00000015682	1.15036	0.0494599	NA	NA	NA	Opisthokonta	UP
ENSOMYG00000015682	1.15036	0.0494599	NA	NA	auh	Opisthokonta	UP
ENSOMYG00000015682	1.15036	0.0494599	NA	NA	hibch	Opisthokonta	UP
ENSOMYG00000015682	1.15036	0.0494599	NA	NA	eci1	Opisthokonta	UP
ENSOMYG00000015682	1.15036	0.0494599	NA	NA	ech1	Opisthokonta	UP
ENSOMYG00000015682	1.15036	0.0494599	NA	NA	echs1	Opisthokonta	UP
ENSOMYG00000015725	-1.0656	0.0297528	NA	NA	NA	Salmoninae	DOWN
ENSOMYG00000015732	1.36396	0.017086	NA	NA	NA	Salmoninae	UP
ENSOMYG00000015732	1.36396	0.017086	NA	NA	NA	Vertebrata	UP
ENSOMYG00000015732	1.36396	0.017086	NA	NA	rab25b	Opisthokonta	UP
ENSOMYG00000015732	1.36396	0.017086	NA	NA	NA	Opisthokonta	UP
ENSOMYG00000015732	1.36396	0.017086	NA	NA	rab34a	Opisthokonta	UP
ENSOMYG00000015732	1.36396	0.017086	NA	NA	RAB34	Opisthokonta	UP
ENSOMYG00000015732	1.36396	0.017086	NA	NA	rab11ba	Opisthokonta	UP
ENSOMYG00000015732	1.36396	0.017086	NA	NA	rb11a	Opisthokonta	UP
ENSOMYG00000015732	1.36396	0.017086	NA	NA	rab32a	Opisthokonta	UP
ENSOMYG00000015732	1.36396	0.017086	NA	NA	rab32b	Opisthokonta	UP
ENSOMYG00000015732	1.36396	0.017086	NA	NA	rab3aa	Opisthokonta	UP
ENSOMYG00000015732	1.36396	0.017086	NA	NA	rab3ab	Opisthokonta	UP
ENSOMYG00000015732	1.36396	0.017086	NA	NA	rab3c	Opisthokonta	UP
ENSOMYG00000015732	1.36396	0.017086	NA	NA	RAB3C	Opisthokonta	UP
ENSOMYG00000015732	1.36396	0.017086	NA	NA	RAB17	Opisthokonta	UP
ENSOMYG00000015732	1.36396	0.017086	NA	NA	rab13	Opisthokonta	UP
ENSOMYG00000015732	1.36396	0.017086	NA	NA	rab5aa	Opisthokonta	UP
ENSOMYG00000015732	1.36396	0.017086	NA	NA	rab5ab	Opisthokonta	UP
ENSOMYG00000015732	1.36396	0.017086	NA	NA	rab11a	Opisthokonta	UP
ENSOMYG00000015732	1.36396	0.017086	NA	NA	RAB11A	Opisthokonta	UP
ENSOMYG00000015732	1.36396	0.017086	NA	NA	RAB38	Opisthokonta	UP
ENSOMYG00000015732	1.36396	0.017086	NA	NA	rab33a	Opisthokonta	UP
ENSOMYG00000015732	1.36396	0.017086	NA	NA	rabl2	Opisthokonta	UP
ENSOMYG00000015732	1.36396	0.017086	NA	NA	rab20	Opisthokonta	UP
ENSOMYG00000015732	1.36396	0.017086	NA	NA	rab40c	Opisthokonta	UP
ENSOMYG00000015732	1.36396	0.017086	NA	NA	rab8a	Opisthokonta	UP
ENSOMYG00000015732	1.36396	0.017086	NA	NA	rab9b	Opisthokonta	UP
ENSOMYG00000015732	1.36396	0.017086	NA	NA	rab36	Opisthokonta	UP
ENSOMYG00000015732	1.36396	0.017086	NA	NA	RAB28	Opisthokonta	UP
ENSOMYG00000015732	1.36396	0.017086	NA	NA	zgc:162171	Opisthokonta	UP
ENSOMYG00000015732	1.36396	0.017086	NA	NA	rab38c	Opisthokonta	UP
ENSOMYG00000015732	1.36396	0.017086	NA	NA	RAB5C	Opisthokonta	UP
ENSOMYG00000015732	1.36396	0.017086	NA	NA	rab5c	Opisthokonta	UP
ENSOMYG00000015732	1.36396	0.017086	NA	NA	rab11bb	Opisthokonta	UP
ENSOMYG00000015732	1.36396	0.017086	NA	NA	rab6bb	Opisthokonta	UP
ENSOMYG00000015732	1.36396	0.017086	NA	NA	rab6ba	Opisthokonta	UP
ENSOMYG00000015732	1.36396	0.017086	NA	NA	rab3b	Opisthokonta	UP
ENSOMYG00000015732	1.36396	0.017086	NA	NA	rab11al	Opisthokonta	UP
ENSOMYG00000015732	1.36396	0.017086	NA	NA	dnajc27	Opisthokonta	UP
ENSOMYG00000015732	1.36396	0.017086	NA	NA	rab12	Opisthokonta	UP
ENSOMYG00000015732	1.36396	0.017086	NA	NA	rab30	Opisthokonta	UP
ENSOMYG00000015732	1.36396	0.017086	NA	NA	rab18a	Opisthokonta	UP
ENSOMYG00000015732	1.36396	0.017086	NA	NA	rab5b	Opisthokonta	UP
ENSOMYG00000015732	1.36396	0.017086	NA	NA	si:dkey-16l2.16	Opisthokonta	UP
ENSOMYG00000015732	1.36396	0.017086	NA	NA	rab43	Opisthokonta	UP
ENSOMYG00000015732	1.36396	0.017086	NA	NA	RAB9A	Opisthokonta	UP
ENSOMYG00000015732	1.36396	0.017086	NA	NA	RAB27A	Opisthokonta	UP
ENSOMYG00000015732	1.36396	0.017086	NA	NA	rab3db	Opisthokonta	UP
ENSOMYG00000015732	1.36396	0.017086	NA	NA	rab22a	Opisthokonta	UP
ENSOMYG00000015732	1.36396	0.017086	NA	NA	rab4b	Opisthokonta	UP
ENSOMYG00000015732	1.36396	0.017086	NA	NA	rab42a	Opisthokonta	UP
ENSOMYG00000015732	1.36396	0.017086	NA	NA	RAB27B	Opisthokonta	UP
ENSOMYG00000015732	1.36396	0.017086	NA	NA	rab33ba	Opisthokonta	UP
ENSOMYG00000015732	1.36396	0.017086	NA	NA	rab23	Opisthokonta	UP
ENSOMYG00000015732	1.36396	0.017086	NA	NA	rab40b	Opisthokonta	UP
ENSOMYG00000015732	1.36396	0.017086	NA	NA	RAB31	Opisthokonta	UP
ENSOMYG00000015732	1.36396	0.017086	NA	NA	RAB24	Opisthokonta	UP
ENSOMYG00000015732	1.36396	0.017086	NA	NA	rab24	Opisthokonta	UP
ENSOMYG00000015732	1.36396	0.017086	NA	NA	rab2a	Opisthokonta	UP
ENSOMYG00000015732	1.36396	0.017086	NA	NA	rab41	Opisthokonta	UP
ENSOMYG00000015732	1.36396	0.017086	NA	NA	rab6a	Opisthokonta	UP
ENSOMYG00000015732	1.36396	0.017086	NA	NA	rab35b	Opisthokonta	UP
ENSOMYG00000015732	1.36396	0.017086	NA	NA	rab15	Opisthokonta	UP
ENSOMYG00000015732	1.36396	0.017086	NA	NA	rab7b	Opisthokonta	UP
ENSOMYG00000015732	1.36396	0.017086	NA	NA	RAB7A	Opisthokonta	UP
ENSOMYG00000015732	1.36396	0.017086	NA	NA	rab7a	Opisthokonta	UP
ENSOMYG00000015732	1.36396	0.017086	NA	NA	rab4a	Opisthokonta	UP
ENSOMYG00000015732	1.36396	0.017086	NA	NA	rasef2	Opisthokonta	UP
ENSOMYG00000015999	-2.97028	0.0366408	NA	NA	NA	Salmoninae	DOWN
ENSOMYG00000015999	-2.97028	0.0366408	NA	NA	NA	Opisthokonta	DOWN
ENSOMYG00000015999	-2.97028	0.0366408	NA	NA	H3-3B	Opisthokonta	DOWN
ENSOMYG00000016096	2.24372	4.74668e-05	NA	NA	tifa	Salmoninae	UP
ENSOMYG00000016119	1.24353	0.0288033	crebrf	creb3 regulatory factor [Source:ZFIN;Acc:ZDB-GENE-120203-3]	crebrf	Salmoninae	UP
ENSOMYG00000016119	1.24353	0.0288033	crebrf	creb3 regulatory factor [Source:ZFIN;Acc:ZDB-GENE-120203-3]	NA	Vertebrata	UP
ENSOMYG00000016252	-1.53241	0.0191888	ddc	dopa decarboxylase [Source:ZFIN;Acc:ZDB-GENE-040426-2656]	ddc	Salmoninae	DOWN
ENSOMYG00000016252	-1.53241	0.0191888	ddc	dopa decarboxylase [Source:ZFIN;Acc:ZDB-GENE-040426-2656]	GADL1	Opisthokonta	DOWN
ENSOMYG00000016252	-1.53241	0.0191888	ddc	dopa decarboxylase [Source:ZFIN;Acc:ZDB-GENE-040426-2656]	GAD1	Opisthokonta	DOWN
ENSOMYG00000016252	-1.53241	0.0191888	ddc	dopa decarboxylase [Source:ZFIN;Acc:ZDB-GENE-040426-2656]	gad1b	Opisthokonta	DOWN
ENSOMYG00000016252	-1.53241	0.0191888	ddc	dopa decarboxylase [Source:ZFIN;Acc:ZDB-GENE-040426-2656]	hdc	Opisthokonta	DOWN
ENSOMYG00000016252	-1.53241	0.0191888	ddc	dopa decarboxylase [Source:ZFIN;Acc:ZDB-GENE-040426-2656]	gad2	Opisthokonta	DOWN
ENSOMYG00000016252	-1.53241	0.0191888	ddc	dopa decarboxylase [Source:ZFIN;Acc:ZDB-GENE-040426-2656]	gad3	Opisthokonta	DOWN
ENSOMYG00000016252	-1.53241	0.0191888	ddc	dopa decarboxylase [Source:ZFIN;Acc:ZDB-GENE-040426-2656]	NA	Opisthokonta	DOWN
ENSOMYG00000016252	-1.53241	0.0191888	ddc	dopa decarboxylase [Source:ZFIN;Acc:ZDB-GENE-040426-2656]	sgpl1	Opisthokonta	DOWN
ENSOMYG00000016358	2.68914	0.000736346	NA	NA	NA	Oncorhynchus mykiss	UP
ENSOMYG00000016358	2.68914	0.000736346	NA	NA	SLC16A3	Euteleosteomorpha	UP
ENSOMYG00000016358	2.68914	0.000736346	NA	NA	SLC16A6	Opisthokonta	UP
ENSOMYG00000016358	2.68914	0.000736346	NA	NA	slc16a12b	Opisthokonta	UP
ENSOMYG00000016358	2.68914	0.000736346	NA	NA	NA	Opisthokonta	UP
ENSOMYG00000016358	2.68914	0.000736346	NA	NA	SLC16A10	Opisthokonta	UP
ENSOMYG00000016358	2.68914	0.000736346	NA	NA	slc16a9a	Opisthokonta	UP
ENSOMYG00000016358	2.68914	0.000736346	NA	NA	SLC16A7	Opisthokonta	UP
ENSOMYG00000016358	2.68914	0.000736346	NA	NA	slc16a5b	Opisthokonta	UP
ENSOMYG00000016358	2.68914	0.000736346	NA	NA	slc16a5a	Opisthokonta	UP
ENSOMYG00000016358	2.68914	0.000736346	NA	NA	slc16a4	Opisthokonta	UP
ENSOMYG00000016358	2.68914	0.000736346	NA	NA	si:dkey-246g23.4	Opisthokonta	UP
ENSOMYG00000016358	2.68914	0.000736346	NA	NA	zgc:114041	Opisthokonta	UP
ENSOMYG00000016358	2.68914	0.000736346	NA	NA	slc16a13	Opisthokonta	UP
ENSOMYG00000016358	2.68914	0.000736346	NA	NA	slc16a1a	Opisthokonta	UP
ENSOMYG00000016464	-1.06426	0.00114858	fzd7b	frizzled class receptor 7b [Source:ZFIN;Acc:ZDB-GENE-990415-229]	NA	Bilateria	DOWN
ENSOMYG00000016464	-1.06426	0.00114858	fzd7b	frizzled class receptor 7b [Source:ZFIN;Acc:ZDB-GENE-990415-229]	fzd1	Bilateria	DOWN
ENSOMYG00000016464	-1.06426	0.00114858	fzd7b	frizzled class receptor 7b [Source:ZFIN;Acc:ZDB-GENE-990415-229]	FZD1	Bilateria	DOWN
ENSOMYG00000016464	-1.06426	0.00114858	fzd7b	frizzled class receptor 7b [Source:ZFIN;Acc:ZDB-GENE-990415-229]	fzd9b	Bilateria	DOWN
ENSOMYG00000016464	-1.06426	0.00114858	fzd7b	frizzled class receptor 7b [Source:ZFIN;Acc:ZDB-GENE-990415-229]	fzd3a	Bilateria	DOWN
ENSOMYG00000016464	-1.06426	0.00114858	fzd7b	frizzled class receptor 7b [Source:ZFIN;Acc:ZDB-GENE-990415-229]	FZD10	Bilateria	DOWN
ENSOMYG00000016464	-1.06426	0.00114858	fzd7b	frizzled class receptor 7b [Source:ZFIN;Acc:ZDB-GENE-990415-229]	sfrp5	Bilateria	DOWN
ENSOMYG00000016464	-1.06426	0.00114858	fzd7b	frizzled class receptor 7b [Source:ZFIN;Acc:ZDB-GENE-990415-229]	smo	Bilateria	DOWN
ENSOMYG00000016464	-1.06426	0.00114858	fzd7b	frizzled class receptor 7b [Source:ZFIN;Acc:ZDB-GENE-990415-229]	frzb	Bilateria	DOWN
ENSOMYG00000016464	-1.06426	0.00114858	fzd7b	frizzled class receptor 7b [Source:ZFIN;Acc:ZDB-GENE-990415-229]	fzd5	Bilateria	DOWN
ENSOMYG00000016464	-1.06426	0.00114858	fzd7b	frizzled class receptor 7b [Source:ZFIN;Acc:ZDB-GENE-990415-229]	fzd8b	Bilateria	DOWN
ENSOMYG00000016464	-1.06426	0.00114858	fzd7b	frizzled class receptor 7b [Source:ZFIN;Acc:ZDB-GENE-990415-229]	fzd8a	Bilateria	DOWN
ENSOMYG00000016464	-1.06426	0.00114858	fzd7b	frizzled class receptor 7b [Source:ZFIN;Acc:ZDB-GENE-990415-229]	FZD6	Bilateria	DOWN
ENSOMYG00000016464	-1.06426	0.00114858	fzd7b	frizzled class receptor 7b [Source:ZFIN;Acc:ZDB-GENE-990415-229]	sfrp1a	Bilateria	DOWN
ENSOMYG00000016464	-1.06426	0.00114858	fzd7b	frizzled class receptor 7b [Source:ZFIN;Acc:ZDB-GENE-990415-229]	fzd2	Bilateria	DOWN
ENSOMYG00000016464	-1.06426	0.00114858	fzd7b	frizzled class receptor 7b [Source:ZFIN;Acc:ZDB-GENE-990415-229]	fzd7b	Oncorhynchus	DOWN
ENSOMYG00000016464	-1.06426	0.00114858	fzd7b	frizzled class receptor 7b [Source:ZFIN;Acc:ZDB-GENE-990415-229]	fzd7a	Osteoglossocephalai	DOWN
ENSOMYG00000016468	-1.0988	0.0228908	themis	thymocyte selection associated [Source:ZFIN;Acc:ZDB-GENE-041008-160]	NA	Oncorhynchus mykiss	DOWN
ENSOMYG00000016468	-1.0988	0.0228908	themis	thymocyte selection associated [Source:ZFIN;Acc:ZDB-GENE-041008-160]	themis	Salmoninae	DOWN
ENSOMYG00000016468	-1.0988	0.0228908	themis	thymocyte selection associated [Source:ZFIN;Acc:ZDB-GENE-041008-160]	NA	Gnathostomata	DOWN
ENSOMYG00000016468	-1.0988	0.0228908	themis	thymocyte selection associated [Source:ZFIN;Acc:ZDB-GENE-041008-160]	THEMIS2	Gnathostomata	DOWN
ENSOMYG00000016585	1.56008	4.47729e-08	NA	NA	NA	Salmoninae	UP
ENSOMYG00000016585	1.56008	4.47729e-08	NA	NA	NA	Euteleosteomorpha	UP
ENSOMYG00000016585	1.56008	4.47729e-08	NA	NA	NA	Clupeocephala	UP
ENSOMYG00000016585	1.56008	4.47729e-08	NA	NA	NA	Euteleostomi	UP
ENSOMYG00000016585	1.56008	4.47729e-08	NA	NA	NA	Vertebrata	UP
ENSOMYG00000016585	1.56008	4.47729e-08	NA	NA	NA	Bilateria	UP
ENSOMYG00000016585	1.56008	4.47729e-08	NA	NA	si:rp71-1g18.1	Bilateria	UP
ENSOMYG00000016585	1.56008	4.47729e-08	NA	NA	znf668	Bilateria	UP
ENSOMYG00000016671	-1.02966	2.28049e-05	pank1b	pantothenate kinase 1b [Source:ZFIN;Acc:ZDB-GENE-070209-259]	NA	Opisthokonta	DOWN
ENSOMYG00000016671	-1.02966	2.28049e-05	pank1b	pantothenate kinase 1b [Source:ZFIN;Acc:ZDB-GENE-070209-259]	pank1b	Salmoninae	DOWN
ENSOMYG00000016671	-1.02966	2.28049e-05	pank1b	pantothenate kinase 1b [Source:ZFIN;Acc:ZDB-GENE-070209-259]	pank1a	Clupeocephala	DOWN
ENSOMYG00000016694	-1.02806	0.0222008	eif4e2	eukaryotic translation initiation factor 4E family member 2 [Source:ZFIN;Acc:ZDB-GENE-050327-59]	NA	Opisthokonta	DOWN
ENSOMYG00000016694	-1.02806	0.0222008	eif4e2	eukaryotic translation initiation factor 4E family member 2 [Source:ZFIN;Acc:ZDB-GENE-050327-59]	eif4ea	Opisthokonta	DOWN
ENSOMYG00000016694	-1.02806	0.0222008	eif4e2	eukaryotic translation initiation factor 4E family member 2 [Source:ZFIN;Acc:ZDB-GENE-050327-59]	if4ea	Opisthokonta	DOWN
ENSOMYG00000016694	-1.02806	0.0222008	eif4e2	eukaryotic translation initiation factor 4E family member 2 [Source:ZFIN;Acc:ZDB-GENE-050327-59]	eif4eb	Opisthokonta	DOWN
ENSOMYG00000016694	-1.02806	0.0222008	eif4e2	eukaryotic translation initiation factor 4E family member 2 [Source:ZFIN;Acc:ZDB-GENE-050327-59]	eif4e1b	Opisthokonta	DOWN
ENSOMYG00000016694	-1.02806	0.0222008	eif4e2	eukaryotic translation initiation factor 4E family member 2 [Source:ZFIN;Acc:ZDB-GENE-050327-59]	EIF4E3	Opisthokonta	DOWN
ENSOMYG00000016694	-1.02806	0.0222008	eif4e2	eukaryotic translation initiation factor 4E family member 2 [Source:ZFIN;Acc:ZDB-GENE-050327-59]	eif4e1c	Opisthokonta	DOWN
ENSOMYG00000016713	-3.35849	0.00557705	NA	NA	NA	NA	DOWN
ENSOMYG00000016749	1.50638	0.0360811	adam28	ADAM metallopeptidase domain 28 [Source:ZFIN;Acc:ZDB-GENE-060929-532]	adam28	Salmoninae	UP
ENSOMYG00000016749	1.50638	0.0360811	adam28	ADAM metallopeptidase domain 28 [Source:ZFIN;Acc:ZDB-GENE-060929-532]	NA	Bilateria	UP
ENSOMYG00000016749	1.50638	0.0360811	adam28	ADAM metallopeptidase domain 28 [Source:ZFIN;Acc:ZDB-GENE-060929-532]	adam12b	Bilateria	UP
ENSOMYG00000016749	1.50638	0.0360811	adam28	ADAM metallopeptidase domain 28 [Source:ZFIN;Acc:ZDB-GENE-060929-532]	ADAM12	Bilateria	UP
ENSOMYG00000016749	1.50638	0.0360811	adam28	ADAM metallopeptidase domain 28 [Source:ZFIN;Acc:ZDB-GENE-060929-532]	ada10	Bilateria	UP
ENSOMYG00000016749	1.50638	0.0360811	adam28	ADAM metallopeptidase domain 28 [Source:ZFIN;Acc:ZDB-GENE-060929-532]	adam15	Bilateria	UP
ENSOMYG00000016749	1.50638	0.0360811	adam28	ADAM metallopeptidase domain 28 [Source:ZFIN;Acc:ZDB-GENE-060929-532]	adam22	Bilateria	UP
ENSOMYG00000016749	1.50638	0.0360811	adam28	ADAM metallopeptidase domain 28 [Source:ZFIN;Acc:ZDB-GENE-060929-532]	ADAM23	Bilateria	UP
ENSOMYG00000016749	1.50638	0.0360811	adam28	ADAM metallopeptidase domain 28 [Source:ZFIN;Acc:ZDB-GENE-060929-532]	adam17b	Bilateria	UP
ENSOMYG00000016749	1.50638	0.0360811	adam28	ADAM metallopeptidase domain 28 [Source:ZFIN;Acc:ZDB-GENE-060929-532]	ADAM17	Bilateria	UP
ENSOMYG00000016749	1.50638	0.0360811	adam28	ADAM metallopeptidase domain 28 [Source:ZFIN;Acc:ZDB-GENE-060929-532]	adam17a	Bilateria	UP
ENSOMYG00000016749	1.50638	0.0360811	adam28	ADAM metallopeptidase domain 28 [Source:ZFIN;Acc:ZDB-GENE-060929-532]	adam9a	Bilateria	UP
ENSOMYG00000016793	1.15348	0.0393736	myd88	MYD88 innate immune signal transduction adaptor [Source:ZFIN;Acc:ZDB-GENE-040219-3]	NA	NA	UP
ENSOMYG00000016800	-1.77933	0.0266256	ndrg1a	N-myc downstream regulated 1a [Source:ZFIN;Acc:ZDB-GENE-030826-34]	ndrg1a	Salmoninae	DOWN
ENSOMYG00000016800	-1.77933	0.0266256	ndrg1a	N-myc downstream regulated 1a [Source:ZFIN;Acc:ZDB-GENE-030826-34]	ndrg1b	Osteoglossocephalai	DOWN
ENSOMYG00000016800	-1.77933	0.0266256	ndrg1a	N-myc downstream regulated 1a [Source:ZFIN;Acc:ZDB-GENE-030826-34]	ndrg4	Vertebrata	DOWN
ENSOMYG00000016800	-1.77933	0.0266256	ndrg1a	N-myc downstream regulated 1a [Source:ZFIN;Acc:ZDB-GENE-030826-34]	ndrg2	Vertebrata	DOWN
ENSOMYG00000016800	-1.77933	0.0266256	ndrg1a	N-myc downstream regulated 1a [Source:ZFIN;Acc:ZDB-GENE-030826-34]	ndrg3a	Vertebrata	DOWN
ENSOMYG00000016800	-1.77933	0.0266256	ndrg1a	N-myc downstream regulated 1a [Source:ZFIN;Acc:ZDB-GENE-030826-34]	NA	Vertebrata	DOWN
ENSOMYG00000016800	-1.77933	0.0266256	ndrg1a	N-myc downstream regulated 1a [Source:ZFIN;Acc:ZDB-GENE-030826-34]	ndrg3b	Vertebrata	DOWN
ENSOMYG00000016935	1.29605	0.0275994	SLC16A6	solute carrier family 16 member 6 [Source:HGNC Symbol;Acc:HGNC:10927]	SLC16A6	Oncorhynchus mykiss	UP
ENSOMYG00000016935	1.29605	0.0275994	SLC16A6	solute carrier family 16 member 6 [Source:HGNC Symbol;Acc:HGNC:10927]	SLC16A6	Clupeocephala	UP
ENSOMYG00000016935	1.29605	0.0275994	SLC16A6	solute carrier family 16 member 6 [Source:HGNC Symbol;Acc:HGNC:10927]	slc16a12b	Opisthokonta	UP
ENSOMYG00000016935	1.29605	0.0275994	SLC16A6	solute carrier family 16 member 6 [Source:HGNC Symbol;Acc:HGNC:10927]	NA	Opisthokonta	UP
ENSOMYG00000016935	1.29605	0.0275994	SLC16A6	solute carrier family 16 member 6 [Source:HGNC Symbol;Acc:HGNC:10927]	SLC16A10	Opisthokonta	UP
ENSOMYG00000016935	1.29605	0.0275994	SLC16A6	solute carrier family 16 member 6 [Source:HGNC Symbol;Acc:HGNC:10927]	slc16a9a	Opisthokonta	UP
ENSOMYG00000016935	1.29605	0.0275994	SLC16A6	solute carrier family 16 member 6 [Source:HGNC Symbol;Acc:HGNC:10927]	SLC16A7	Opisthokonta	UP
ENSOMYG00000016935	1.29605	0.0275994	SLC16A6	solute carrier family 16 member 6 [Source:HGNC Symbol;Acc:HGNC:10927]	slc16a5b	Opisthokonta	UP
ENSOMYG00000016935	1.29605	0.0275994	SLC16A6	solute carrier family 16 member 6 [Source:HGNC Symbol;Acc:HGNC:10927]	slc16a5a	Opisthokonta	UP
ENSOMYG00000016935	1.29605	0.0275994	SLC16A6	solute carrier family 16 member 6 [Source:HGNC Symbol;Acc:HGNC:10927]	slc16a4	Opisthokonta	UP
ENSOMYG00000016935	1.29605	0.0275994	SLC16A6	solute carrier family 16 member 6 [Source:HGNC Symbol;Acc:HGNC:10927]	si:dkey-246g23.4	Opisthokonta	UP
ENSOMYG00000016935	1.29605	0.0275994	SLC16A6	solute carrier family 16 member 6 [Source:HGNC Symbol;Acc:HGNC:10927]	zgc:114041	Opisthokonta	UP
ENSOMYG00000016935	1.29605	0.0275994	SLC16A6	solute carrier family 16 member 6 [Source:HGNC Symbol;Acc:HGNC:10927]	slc16a13	Opisthokonta	UP
ENSOMYG00000016935	1.29605	0.0275994	SLC16A6	solute carrier family 16 member 6 [Source:HGNC Symbol;Acc:HGNC:10927]	slc16a1a	Opisthokonta	UP
ENSOMYG00000016935	1.29605	0.0275994	SLC16A6	solute carrier family 16 member 6 [Source:HGNC Symbol;Acc:HGNC:10927]	SLC16A3	Opisthokonta	UP
ENSOMYG00000016981	-1.00281	0.0261847	rftn2	raftlin family member 2 [Source:ZFIN;Acc:ZDB-GENE-040426-2760]	rftn2	Salmoninae	DOWN
ENSOMYG00000016981	-1.00281	0.0261847	rftn2	raftlin family member 2 [Source:ZFIN;Acc:ZDB-GENE-040426-2760]	rftn1a	Gnathostomata	DOWN
ENSOMYG00000016981	-1.00281	0.0261847	rftn2	raftlin family member 2 [Source:ZFIN;Acc:ZDB-GENE-040426-2760]	NA	Gnathostomata	DOWN
ENSOMYG00000017016	1.46999	1.94568e-10	cdkn1ba	cyclin dependent kinase inhibitor 1Ba [Source:ZFIN;Acc:ZDB-GENE-040812-3]	NA	Salmoninae	UP
ENSOMYG00000017016	1.46999	1.94568e-10	cdkn1ba	cyclin dependent kinase inhibitor 1Ba [Source:ZFIN;Acc:ZDB-GENE-040812-3]	cdkn1bb	Osteoglossocephalai	UP
ENSOMYG00000017016	1.46999	1.94568e-10	cdkn1ba	cyclin dependent kinase inhibitor 1Ba [Source:ZFIN;Acc:ZDB-GENE-040812-3]	NA	Gnathostomata	UP
ENSOMYG00000017016	1.46999	1.94568e-10	cdkn1ba	cyclin dependent kinase inhibitor 1Ba [Source:ZFIN;Acc:ZDB-GENE-040812-3]	cdkn1ca	Gnathostomata	UP
ENSOMYG00000017016	1.46999	1.94568e-10	cdkn1ba	cyclin dependent kinase inhibitor 1Ba [Source:ZFIN;Acc:ZDB-GENE-040812-3]	cdkn1a	Gnathostomata	UP
ENSOMYG00000017134	1.21525	0.0101371	ERO1B	endoplasmic reticulum oxidoreductase 1 beta [Source:HGNC Symbol;Acc:HGNC:14355]	ero1b	Salmoninae	UP
ENSOMYG00000017134	1.21525	0.0101371	ERO1B	endoplasmic reticulum oxidoreductase 1 beta [Source:HGNC Symbol;Acc:HGNC:14355]	ero1a	Vertebrata	UP
ENSOMYG00000017226	-1.27259	0.00128633	NA	NA	NA	Salmoninae	DOWN
ENSOMYG00000017229	1.32742	0.00108013	SLC26A2	solute carrier family 26 member 2 [Source:HGNC Symbol;Acc:HGNC:10994]	slc26a1	Vertebrata	UP
ENSOMYG00000017229	1.32742	0.00108013	SLC26A2	solute carrier family 26 member 2 [Source:HGNC Symbol;Acc:HGNC:10994]	slc26a11	Opisthokonta	UP
ENSOMYG00000017229	1.32742	0.00108013	SLC26A2	solute carrier family 26 member 2 [Source:HGNC Symbol;Acc:HGNC:10994]	slc26a4	Opisthokonta	UP
ENSOMYG00000017229	1.32742	0.00108013	SLC26A2	solute carrier family 26 member 2 [Source:HGNC Symbol;Acc:HGNC:10994]	slc26a5	Opisthokonta	UP
ENSOMYG00000017229	1.32742	0.00108013	SLC26A2	solute carrier family 26 member 2 [Source:HGNC Symbol;Acc:HGNC:10994]	NA	Opisthokonta	UP
ENSOMYG00000017229	1.32742	0.00108013	SLC26A2	solute carrier family 26 member 2 [Source:HGNC Symbol;Acc:HGNC:10994]	slc26a6l2	Opisthokonta	UP
ENSOMYG00000017229	1.32742	0.00108013	SLC26A2	solute carrier family 26 member 2 [Source:HGNC Symbol;Acc:HGNC:10994]	slc26a6	Opisthokonta	UP
ENSOMYG00000017229	1.32742	0.00108013	SLC26A2	solute carrier family 26 member 2 [Source:HGNC Symbol;Acc:HGNC:10994]	slc26a10	Opisthokonta	UP
ENSOMYG00000017229	1.32742	0.00108013	SLC26A2	solute carrier family 26 member 2 [Source:HGNC Symbol;Acc:HGNC:10994]	slc26a6l1	Opisthokonta	UP
ENSOMYG00000017288	1.33784	0.0189899	cmas	NA	NA	Salmoninae	UP
ENSOMYG00000017399	1.59688	0.0376917	JUNB	JunB proto-oncogene, AP-1 transcription factor subunit [Source:HGNC Symbol;Acc:HGNC:6205]	NA	Bilateria	UP
ENSOMYG00000017399	1.59688	0.0376917	JUNB	JunB proto-oncogene, AP-1 transcription factor subunit [Source:HGNC Symbol;Acc:HGNC:6205]	jun	Bilateria	UP
ENSOMYG00000017399	1.59688	0.0376917	JUNB	JunB proto-oncogene, AP-1 transcription factor subunit [Source:HGNC Symbol;Acc:HGNC:6205]	june	Bilateria	UP
ENSOMYG00000017399	1.59688	0.0376917	JUNB	JunB proto-oncogene, AP-1 transcription factor subunit [Source:HGNC Symbol;Acc:HGNC:6205]	jund	Bilateria	UP
ENSOMYG00000017399	1.59688	0.0376917	JUNB	JunB proto-oncogene, AP-1 transcription factor subunit [Source:HGNC Symbol;Acc:HGNC:6205]	JUND	Bilateria	UP
ENSOMYG00000017399	1.59688	0.0376917	JUNB	JunB proto-oncogene, AP-1 transcription factor subunit [Source:HGNC Symbol;Acc:HGNC:6205]	JUNB	Oncorhynchus	UP
ENSOMYG00000017399	1.59688	0.0376917	JUNB	JunB proto-oncogene, AP-1 transcription factor subunit [Source:HGNC Symbol;Acc:HGNC:6205]	junbb	Osteoglossocephalai	UP
ENSOMYG00000017626	1.9717	0.000339132	NA	NA	NA	Salmoninae	UP
ENSOMYG00000017626	1.9717	0.000339132	NA	NA	NA	Euteleosteomorpha	UP
ENSOMYG00000017626	1.9717	0.000339132	NA	NA	NA	Clupeocephala	UP
ENSOMYG00000017626	1.9717	0.000339132	NA	NA	NA	Euteleostomi	UP
ENSOMYG00000017626	1.9717	0.000339132	NA	NA	NA	Vertebrata	UP
ENSOMYG00000017626	1.9717	0.000339132	NA	NA	NA	Bilateria	UP
ENSOMYG00000017626	1.9717	0.000339132	NA	NA	si:rp71-1g18.1	Bilateria	UP
ENSOMYG00000017626	1.9717	0.000339132	NA	NA	znf668	Bilateria	UP
ENSOMYG00000017733	1.16518	0.0371046	NA	NA	NA	Salmoninae	UP
ENSOMYG00000017733	1.16518	0.0371046	NA	NA	NA	Osteoglossocephalai	UP
ENSOMYG00000017733	1.16518	0.0371046	NA	NA	tbc1d2	Opisthokonta	UP
ENSOMYG00000017733	1.16518	0.0371046	NA	NA	NA	Opisthokonta	UP
ENSOMYG00000017733	1.16518	0.0371046	NA	NA	tbc1d17	Opisthokonta	UP
ENSOMYG00000017733	1.16518	0.0371046	NA	NA	tbc1d10b	Opisthokonta	UP
ENSOMYG00000017733	1.16518	0.0371046	NA	NA	rabgap1l2	Opisthokonta	UP
ENSOMYG00000017733	1.16518	0.0371046	NA	NA	tbc1d8b	Opisthokonta	UP
ENSOMYG00000017733	1.16518	0.0371046	NA	NA	TBC1D1	Opisthokonta	UP
ENSOMYG00000017733	1.16518	0.0371046	NA	NA	TBC1D10A	Opisthokonta	UP
ENSOMYG00000017733	1.16518	0.0371046	NA	NA	tbc1d25	Opisthokonta	UP
ENSOMYG00000017733	1.16518	0.0371046	NA	NA	grtp1b	Opisthokonta	UP
ENSOMYG00000017733	1.16518	0.0371046	NA	NA	grtp1a	Opisthokonta	UP
ENSOMYG00000017733	1.16518	0.0371046	NA	NA	si:dkey-238d18.4	Opisthokonta	UP
ENSOMYG00000017733	1.16518	0.0371046	NA	NA	tbc1d22a	Opisthokonta	UP
ENSOMYG00000017733	1.16518	0.0371046	NA	NA	tbc1d12b	Opisthokonta	UP
ENSOMYG00000017733	1.16518	0.0371046	NA	NA	TBC1D4	Opisthokonta	UP
ENSOMYG00000017733	1.16518	0.0371046	NA	NA	evi5b	Opisthokonta	UP
ENSOMYG00000017733	1.16518	0.0371046	NA	NA	tbc1d30	Opisthokonta	UP
ENSOMYG00000017733	1.16518	0.0371046	NA	NA	usp6nl	Opisthokonta	UP
ENSOMYG00000017733	1.16518	0.0371046	NA	NA	tbc1d5	Opisthokonta	UP
ENSOMYG00000017733	1.16518	0.0371046	NA	NA	tbck	Opisthokonta	UP
ENSOMYG00000017733	1.16518	0.0371046	NA	NA	tbc1d9	Opisthokonta	UP
ENSOMYG00000017733	1.16518	0.0371046	NA	NA	si:ch211-266k8.4	Opisthokonta	UP
ENSOMYG00000017733	1.16518	0.0371046	NA	NA	TBC1D8	Opisthokonta	UP
ENSOMYG00000017733	1.16518	0.0371046	NA	NA	TBC1D14	Opisthokonta	UP
ENSOMYG00000017733	1.16518	0.0371046	NA	NA	tbc1d14	Opisthokonta	UP
ENSOMYG00000017733	1.16518	0.0371046	NA	NA	tbc1d16	Opisthokonta	UP
ENSOMYG00000017733	1.16518	0.0371046	NA	NA	rabgap1	Opisthokonta	UP
ENSOMYG00000017733	1.16518	0.0371046	NA	NA	TBC1D9B	Opisthokonta	UP
ENSOMYG00000017733	1.16518	0.0371046	NA	NA	si:dkeyp-19e1.3	Opisthokonta	UP
ENSOMYG00000017733	1.16518	0.0371046	NA	NA	tbc1d10c	Opisthokonta	UP
ENSOMYG00000017937	-1.47048	0.0350162	rab11fip5b	RAB11 family interacting protein 5b (class I) [Source:ZFIN;Acc:ZDB-GENE-041111-111]	NA	Bilateria	DOWN
ENSOMYG00000017937	-1.47048	0.0350162	rab11fip5b	RAB11 family interacting protein 5b (class I) [Source:ZFIN;Acc:ZDB-GENE-041111-111]	rab11fip5b	Salmoninae	DOWN
ENSOMYG00000017937	-1.47048	0.0350162	rab11fip5b	RAB11 family interacting protein 5b (class I) [Source:ZFIN;Acc:ZDB-GENE-041111-111]	NA	Osteoglossocephalai	DOWN
ENSOMYG00000018245	-1.01523	0.0126393	adamts12	ADAM metallopeptidase with thrombospondin type 1 motif, 12 [Source:ZFIN;Acc:ZDB-GENE-070705-471]	adamts12	Salmoninae	DOWN
ENSOMYG00000018245	-1.01523	0.0126393	adamts12	ADAM metallopeptidase with thrombospondin type 1 motif, 12 [Source:ZFIN;Acc:ZDB-GENE-070705-471]	NA	Bilateria	DOWN
ENSOMYG00000018245	-1.01523	0.0126393	adamts12	ADAM metallopeptidase with thrombospondin type 1 motif, 12 [Source:ZFIN;Acc:ZDB-GENE-070705-471]	paplnb	Bilateria	DOWN
ENSOMYG00000018245	-1.01523	0.0126393	adamts12	ADAM metallopeptidase with thrombospondin type 1 motif, 12 [Source:ZFIN;Acc:ZDB-GENE-070705-471]	adamtsl3	Bilateria	DOWN
ENSOMYG00000018245	-1.01523	0.0126393	adamts12	ADAM metallopeptidase with thrombospondin type 1 motif, 12 [Source:ZFIN;Acc:ZDB-GENE-070705-471]	ADAMTS17	Bilateria	DOWN
[truncated: 3,851 more rows]

## Sheet: Intersct_Meta_Hypoxia
Figure 3C. Significantly expressed intersecting genes (including paralogs) identified in the cumulative hypoxix stress datasets in Venn diagram.
Gene_ID	log2FoldChange	adjusted.P.Value	external_gene_name	description	omykiss_paralog_associated_gene_name	omykiss_paralog_subtype	Regulation
ENSOMYG00000000925	2.75097	0.00707842	ddit4	DNA-damage-inducible transcript 4 [Source:ZFIN;Acc:ZDB-GENE-031002-35]	ddit4	Oncorhynchus mykiss	UP
ENSOMYG00000000925	2.75097	0.00707842	ddit4	DNA-damage-inducible transcript 4 [Source:ZFIN;Acc:ZDB-GENE-031002-35]	NA	Osteoglossocephalai	UP
ENSOMYG00000000925	2.75097	0.00707842	ddit4	DNA-damage-inducible transcript 4 [Source:ZFIN;Acc:ZDB-GENE-031002-35]	NA	Gnathostomata	UP
ENSOMYG00000000925	2.75097	0.00707842	ddit4	DNA-damage-inducible transcript 4 [Source:ZFIN;Acc:ZDB-GENE-031002-35]	DDIT4L	Gnathostomata	UP
ENSOMYG00000001525	1.17497	7.15085e-05	NA	NA	tdh2	Opisthokonta	UP
ENSOMYG00000001525	1.17497	7.15085e-05	NA	NA	NA	Opisthokonta	UP
ENSOMYG00000001525	1.17497	7.15085e-05	NA	NA	sdr42e1	Opisthokonta	UP
ENSOMYG00000001525	1.17497	7.15085e-05	NA	NA	gale	Opisthokonta	UP
ENSOMYG00000001525	1.17497	7.15085e-05	NA	NA	hsd3b7	Opisthokonta	UP
ENSOMYG00000001525	1.17497	7.15085e-05	NA	NA	nsdhl	Opisthokonta	UP
ENSOMYG00000001525	1.17497	7.15085e-05	NA	NA	gmds	Opisthokonta	UP
ENSOMYG00000001525	1.17497	7.15085e-05	NA	NA	sdr42e2	Opisthokonta	UP
ENSOMYG00000001525	1.17497	7.15085e-05	NA	NA	uxs1	Opisthokonta	UP
ENSOMYG00000001525	1.17497	7.15085e-05	NA	NA	tdh	Salmoninae	UP
ENSOMYG00000017016	1.46999	1.94568e-10	cdkn1ba	cyclin dependent kinase inhibitor 1Ba [Source:ZFIN;Acc:ZDB-GENE-040812-3]	NA	Salmoninae	UP
ENSOMYG00000017016	1.46999	1.94568e-10	cdkn1ba	cyclin dependent kinase inhibitor 1Ba [Source:ZFIN;Acc:ZDB-GENE-040812-3]	cdkn1bb	Osteoglossocephalai	UP
ENSOMYG00000017016	1.46999	1.94568e-10	cdkn1ba	cyclin dependent kinase inhibitor 1Ba [Source:ZFIN;Acc:ZDB-GENE-040812-3]	NA	Gnathostomata	UP
ENSOMYG00000017016	1.46999	1.94568e-10	cdkn1ba	cyclin dependent kinase inhibitor 1Ba [Source:ZFIN;Acc:ZDB-GENE-040812-3]	cdkn1ca	Gnathostomata	UP
ENSOMYG00000017016	1.46999	1.94568e-10	cdkn1ba	cyclin dependent kinase inhibitor 1Ba [Source:ZFIN;Acc:ZDB-GENE-040812-3]	cdkn1a	Gnathostomata	UP
ENSOMYG00000022552	1.39724	6.04783e-08	znf395a	zinc finger protein 395a [Source:ZFIN;Acc:ZDB-GENE-061215-52]	znf395a	Salmoninae	UP
ENSOMYG00000022552	1.39724	6.04783e-08	znf395a	zinc finger protein 395a [Source:ZFIN;Acc:ZDB-GENE-061215-52]	znf395b	Osteoglossocephalai	UP
ENSOMYG00000022552	1.39724	6.04783e-08	znf395a	zinc finger protein 395a [Source:ZFIN;Acc:ZDB-GENE-061215-52]	NA	Bilateria	UP
ENSOMYG00000022552	1.39724	6.04783e-08	znf395a	zinc finger protein 395a [Source:ZFIN;Acc:ZDB-GENE-061215-52]	znf704	Bilateria	UP
ENSOMYG00000022552	1.39724	6.04783e-08	znf395a	zinc finger protein 395a [Source:ZFIN;Acc:ZDB-GENE-061215-52]	slc2a4rg	Bilateria	UP
ENSOMYG00000022630	1.04075	0.000972701	egln2	egl-9 family hypoxia-inducible factor 2 [Source:ZFIN;Acc:ZDB-GENE-060503-757]	egln2	Salmoninae	UP
ENSOMYG00000022630	1.04075	0.000972701	egln2	egl-9 family hypoxia-inducible factor 2 [Source:ZFIN;Acc:ZDB-GENE-060503-757]	NA	Bilateria	UP
ENSOMYG00000022630	1.04075	0.000972701	egln2	egl-9 family hypoxia-inducible factor 2 [Source:ZFIN;Acc:ZDB-GENE-060503-757]	egln1	Bilateria	UP
ENSOMYG00000022630	1.04075	0.000972701	egln2	egl-9 family hypoxia-inducible factor 2 [Source:ZFIN;Acc:ZDB-GENE-060503-757]	egln1a	Bilateria	UP
ENSOMYG00000022630	1.04075	0.000972701	egln2	egl-9 family hypoxia-inducible factor 2 [Source:ZFIN;Acc:ZDB-GENE-060503-757]	egln3	Bilateria	UP
ENSOMYG00000022630	1.04075	0.000972701	egln2	egl-9 family hypoxia-inducible factor 2 [Source:ZFIN;Acc:ZDB-GENE-060503-757]	EGLN3	Bilateria	UP
ENSOMYG00000028743	1.9657	8.05094e-11	klf9	Kruppel like factor 9 [Source:ZFIN;Acc:ZDB-GENE-060526-244]	NA	Bilateria	UP
ENSOMYG00000028743	1.9657	8.05094e-11	klf9	Kruppel like factor 9 [Source:ZFIN;Acc:ZDB-GENE-060526-244]	si:ch211-117k10.3	Bilateria	UP
ENSOMYG00000028743	1.9657	8.05094e-11	klf9	Kruppel like factor 9 [Source:ZFIN;Acc:ZDB-GENE-060526-244]	klf5l	Bilateria	UP
ENSOMYG00000028743	1.9657	8.05094e-11	klf9	Kruppel like factor 9 [Source:ZFIN;Acc:ZDB-GENE-060526-244]	klf8	Bilateria	UP
ENSOMYG00000028743	1.9657	8.05094e-11	klf9	Kruppel like factor 9 [Source:ZFIN;Acc:ZDB-GENE-060526-244]	sp8b	Bilateria	UP
ENSOMYG00000028743	1.9657	8.05094e-11	klf9	Kruppel like factor 9 [Source:ZFIN;Acc:ZDB-GENE-060526-244]	zgc:153115	Bilateria	UP
ENSOMYG00000028743	1.9657	8.05094e-11	klf9	Kruppel like factor 9 [Source:ZFIN;Acc:ZDB-GENE-060526-244]	klf13	Bilateria	UP
ENSOMYG00000028743	1.9657	8.05094e-11	klf9	Kruppel like factor 9 [Source:ZFIN;Acc:ZDB-GENE-060526-244]	sp9	Bilateria	UP
ENSOMYG00000028743	1.9657	8.05094e-11	klf9	Kruppel like factor 9 [Source:ZFIN;Acc:ZDB-GENE-060526-244]	klf11a	Bilateria	UP
ENSOMYG00000028743	1.9657	8.05094e-11	klf9	Kruppel like factor 9 [Source:ZFIN;Acc:ZDB-GENE-060526-244]	KLF11	Bilateria	UP
ENSOMYG00000028743	1.9657	8.05094e-11	klf9	Kruppel like factor 9 [Source:ZFIN;Acc:ZDB-GENE-060526-244]	sp5a	Bilateria	UP
ENSOMYG00000028743	1.9657	8.05094e-11	klf9	Kruppel like factor 9 [Source:ZFIN;Acc:ZDB-GENE-060526-244]	klf15	Bilateria	UP
ENSOMYG00000028743	1.9657	8.05094e-11	klf9	Kruppel like factor 9 [Source:ZFIN;Acc:ZDB-GENE-060526-244]	klf12b	Bilateria	UP
ENSOMYG00000028743	1.9657	8.05094e-11	klf9	Kruppel like factor 9 [Source:ZFIN;Acc:ZDB-GENE-060526-244]	klf12a	Bilateria	UP
ENSOMYG00000028743	1.9657	8.05094e-11	klf9	Kruppel like factor 9 [Source:ZFIN;Acc:ZDB-GENE-060526-244]	sp5l	Bilateria	UP
ENSOMYG00000028743	1.9657	8.05094e-11	klf9	Kruppel like factor 9 [Source:ZFIN;Acc:ZDB-GENE-060526-244]	KLF6	Bilateria	UP
ENSOMYG00000028743	1.9657	8.05094e-11	klf9	Kruppel like factor 9 [Source:ZFIN;Acc:ZDB-GENE-060526-244]	klf6a	Bilateria	UP
ENSOMYG00000028743	1.9657	8.05094e-11	klf9	Kruppel like factor 9 [Source:ZFIN;Acc:ZDB-GENE-060526-244]	klf1	Bilateria	UP
ENSOMYG00000028743	1.9657	8.05094e-11	klf9	Kruppel like factor 9 [Source:ZFIN;Acc:ZDB-GENE-060526-244]	klf17	Bilateria	UP
ENSOMYG00000028743	1.9657	8.05094e-11	klf9	Kruppel like factor 9 [Source:ZFIN;Acc:ZDB-GENE-060526-244]	klf5a	Bilateria	UP
ENSOMYG00000028743	1.9657	8.05094e-11	klf9	Kruppel like factor 9 [Source:ZFIN;Acc:ZDB-GENE-060526-244]	klf5b	Bilateria	UP
ENSOMYG00000028743	1.9657	8.05094e-11	klf9	Kruppel like factor 9 [Source:ZFIN;Acc:ZDB-GENE-060526-244]	klf7a	Bilateria	UP
ENSOMYG00000028743	1.9657	8.05094e-11	klf9	Kruppel like factor 9 [Source:ZFIN;Acc:ZDB-GENE-060526-244]	sp7	Bilateria	UP
ENSOMYG00000028743	1.9657	8.05094e-11	klf9	Kruppel like factor 9 [Source:ZFIN;Acc:ZDB-GENE-060526-244]	klf2a	Bilateria	UP
ENSOMYG00000028743	1.9657	8.05094e-11	klf9	Kruppel like factor 9 [Source:ZFIN;Acc:ZDB-GENE-060526-244]	klf2b	Bilateria	UP
ENSOMYG00000028743	1.9657	8.05094e-11	klf9	Kruppel like factor 9 [Source:ZFIN;Acc:ZDB-GENE-060526-244]	NA	Actinopterygii	UP
ENSOMYG00000042667	1.40353	1.32382e-06	cebpd	CCAAT enhancer binding protein delta [Source:ZFIN;Acc:ZDB-GENE-020111-4]	NA	Bilateria	UP
ENSOMYG00000042667	1.40353	1.32382e-06	cebpd	CCAAT enhancer binding protein delta [Source:ZFIN;Acc:ZDB-GENE-020111-4]	cebpb	Bilateria	UP
ENSOMYG00000042667	1.40353	1.32382e-06	cebpd	CCAAT enhancer binding protein delta [Source:ZFIN;Acc:ZDB-GENE-020111-4]	cebpd	Salmoninae	UP
ENSOMYG00000045565	1.48947	4.25559e-07	NA	NA	NA	Bilateria	UP
ENSOMYG00000045565	1.48947	4.25559e-07	NA	NA	irs2b	Bilateria	UP
ENSOMYG00000045565	1.48947	4.25559e-07	NA	NA	irs2a	Bilateria	UP
ENSOMYG00000045565	1.48947	4.25559e-07	NA	NA	irs4a	Bilateria	UP
ENSOMYG00000045565	1.48947	4.25559e-07	NA	NA	si:ch73-335l21.1	Bilateria	UP
ENSOMYG00000068030	2.23093	0.00746566	ddit4	DNA-damage-inducible transcript 4 [Source:ZFIN;Acc:ZDB-GENE-031002-35]	ddit4	Oncorhynchus mykiss	UP
ENSOMYG00000068030	2.23093	0.00746566	ddit4	DNA-damage-inducible transcript 4 [Source:ZFIN;Acc:ZDB-GENE-031002-35]	NA	Osteoglossocephalai	UP
ENSOMYG00000068030	2.23093	0.00746566	ddit4	DNA-damage-inducible transcript 4 [Source:ZFIN;Acc:ZDB-GENE-031002-35]	NA	Gnathostomata	UP
ENSOMYG00000068030	2.23093	0.00746566	ddit4	DNA-damage-inducible transcript 4 [Source:ZFIN;Acc:ZDB-GENE-031002-35]	DDIT4L	Gnathostomata	UP
ENSOMYG00000069122	-1.77576	0.00585259	NA	NA	NA	Oncorhynchus	DOWN
ENSOMYG00000069122	-1.77576	0.00585259	NA	NA	rl31	Salmoninae	DOWN
ENSOMYG00000069122	-1.77576	0.00585259	NA	NA	rpl31	Salmoninae	DOWN
