# Supplementary material for: A meta-analysis of public RNA-Seq data identifies conserved stress responses in rainbow trout
Source: BMC Genomics. 2025 Nov 5;26:999. doi: 10.1186/s12864-025-12127-2 (PMC12590911; doi:10.1186/s12864-025-12127-2)
Supplement: Supplementary file 4 — Supplementary material 4. [file 12864_2025_12127_MOESM4_ESM.xlsx]

## Sheet: GO_Meta analysis
Supplementary Table S5A. Top 30 functional enrichment analysis terms of meta-analysis data.
1. Top 20 GO Biological Process Results
GO Term	GO ID	Adjust P-value	Count
DNA metabolic process	GO:0006259	0.000549755	260
DNA integration	GO:0015074	0.0419443	216
DNA recombination	GO:0006310	0.00756713	163
transposition	GO:0032196	0.0133434	157
DNA transposition	GO:0006313	0.0133434	157
transmembrane transport	GO:0055085	0.00825749	114
multicellular organismal process	GO:0032501	0.00628925	88
organelle organization	GO:0006996	0.00310577	75
anatomical structure development	GO:0048856	0.0474395	67
cell cycle	GO:0007049	7.5584e-13	62
multicellular organism development	GO:0007275	0.0212971	59
metal ion transport	GO:0030001	0.0491399	51
system development	GO:0048731	0.0227551	43
immune system process	GO:0002376	0.00079977	41
cell cycle process	GO:0022402	5.04707e-09	38
immune response	GO:0006955	0.000549755	38
response to external stimulus	GO:0009605	1.43558e-05	37
chromosome organization	GO:0051276	2.03845e-10	34
microtubule-based process	GO:0007017	0.03669	34
defense response	GO:0006952	0.00139191	29
2. Top 20 GO Molecular Function Results
GO Term	GO ID	Adjust P-value	Count
binding	GO:0005488	2.55681e-13	1151
organic cyclic compound binding	GO:0097159	2.90573e-07	634
catalytic activity	GO:0003824	0.00456237	480
small molecule binding	GO:0036094	1.95339e-05	422
ion binding	GO:0043167	3.17101e-05	408
DNA binding	GO:0003677	2.90573e-07	285
heterocyclic compound binding	GO:1901363	3.93084e-06	234
anion binding	GO:0043168	1.2375e-06	231
nucleoside phosphate binding	GO:1901265	1.95339e-05	220
nucleotide binding	GO:0000166	1.95861e-05	219
carbohydrate derivative binding	GO:0097367	2.53118e-05	210
purine nucleotide binding	GO:0017076	4.94512e-05	208
purine ribonucleotide binding	GO:0032555	3.17101e-05	203
ribonucleotide binding	GO:0032553	4.28967e-05	203
purine ribonucleoside triphosphate binding	GO:0035639	3.29189e-05	202
adenyl nucleotide binding	GO:0030554	2.45568e-05	163
adenyl ribonucleotide binding	GO:0032559	1.95339e-05	159
ATP binding	GO:0005524	1.95339e-05	158
transporter activity	GO:0005215	1.11698e-05	130
transmembrane transporter activity	GO:0022857	7.00454e-06	126
3. Top 20 GO Cellular Component Results
GO Term	GO ID	Adjust P-value	Count
membrane	GO:0016020	8.78577e-17	387
nucleus	GO:0005634	0.0290733	166
cell periphery	GO:0071944	3.60121e-06	97
plasma membrane	GO:0005886	5.20087e-06	91
extracellular region	GO:0005576	1.85788e-05	73
intracellular organelle lumen	GO:0070013	0.000963645	53
organelle lumen	GO:0043233	0.000963645	53
membrane-enclosed lumen	GO:0031974	0.000963645	53
cytoskeleton	GO:0005856	0.00219443	51
nuclear lumen	GO:0031981	0.000904071	48
supramolecular complex	GO:0099080	1.80806e-09	39
nucleolus	GO:0005730	0.000773563	39
chromosome	GO:0005694	0.0109598	33
supramolecular fiber	GO:0099512	2.33786e-06	30
supramolecular polymer	GO:0099081	2.33786e-06	30
plasma membrane protein complex	GO:0098797	0.00663963	30
transporter complex	GO:1990351	0.0202569	21
transmembrane transporter complex	GO:1902495	0.0202569	21
monoatomic ion channel complex	GO:0034702	0.00171902	20
actin cytoskeleton	GO:0015629	0.00533786	20

## Sheet: Gene Ontology_Details
Supplementary table S5B: All the functional enrichment analysis terms of meta-analysis data.
GO term_id	Category	p_value	Term_name	source_order	parents	intersection	highlighted	significant	term_size	query_size	intersection_size	precision	recall
GO:0006261	GO:BP	5.67784e-13	DNA-templated DNA replication	2078	GO:0006260	ENSOMYG00000000116,ENSOMYG00000001753,ENSOMYG00000003321,ENSOMYG00000010384,ENSOMYG00000016713,ENSOMYG00000017817,ENSOMYG00000019750,ENSOMYG00000019951,ENSOMYG00000022528,ENSOMYG00000027207,ENSOMYG00000029221,ENSOMYG00000031800,ENSOMYG00000033325,ENSOMYG00000035735,ENSOMYG00000036018,ENSOMYG00000041586,ENSOMYG00000042181,ENSOMYG00000046314,ENSOMYG00000047004,ENSOMYG00000069397	TRUE	TRUE	37	1268	20	0.0157729	0.540541
GO:0007049	GO:BP	7.5584e-13	cell cycle	2649	GO:0009987	ENSOMYG00000000138,ENSOMYG00000000868,ENSOMYG00000002752,ENSOMYG00000004181,ENSOMYG00000004686,ENSOMYG00000005233,ENSOMYG00000006152,ENSOMYG00000007838,ENSOMYG00000009318,ENSOMYG00000009607,ENSOMYG00000010238,ENSOMYG00000010965,ENSOMYG00000012456,ENSOMYG00000015144,ENSOMYG00000015280,ENSOMYG00000015326,ENSOMYG00000016132,ENSOMYG00000016154,ENSOMYG00000017016,ENSOMYG00000017226,ENSOMYG00000018434,…	TRUE	TRUE	361	1268	62	0.0488959	0.171745
GO:0051276	GO:BP	2.03845e-10	chromosome organization	13613	GO:0006996	ENSOMYG00000000868,ENSOMYG00000001753,ENSOMYG00000004365,ENSOMYG00000005233,ENSOMYG00000006152,ENSOMYG00000009450,ENSOMYG00000009607,ENSOMYG00000011026,ENSOMYG00000015326,ENSOMYG00000016154,ENSOMYG00000018740,ENSOMYG00000022528,ENSOMYG00000029221,ENSOMYG00000031800,ENSOMYG00000033325,ENSOMYG00000033332,ENSOMYG00000035735,ENSOMYG00000037483,ENSOMYG00000037794,ENSOMYG00000038542,ENSOMYG00000041611,…	FALSE	TRUE	145	1268	34	0.0268139	0.234483
GO:0006260	GO:BP	1.91002e-09	DNA replication	2077	GO:0006259	ENSOMYG00000000116,ENSOMYG00000001219,ENSOMYG00000001753,ENSOMYG00000003163,ENSOMYG00000003321,ENSOMYG00000007986,ENSOMYG00000010384,ENSOMYG00000012427,ENSOMYG00000013729,ENSOMYG00000016713,ENSOMYG00000017817,ENSOMYG00000019750,ENSOMYG00000019951,ENSOMYG00000022528,ENSOMYG00000027207,ENSOMYG00000029221,ENSOMYG00000030943,ENSOMYG00000031800,ENSOMYG00000033325,ENSOMYG00000035735,ENSOMYG00000036018,…	FALSE	TRUE	102	1268	27	0.0212934	0.264706
GO:0006270	GO:BP	3.21615e-09	DNA replication initiation	2085	GO:0006259, GO:0006261	ENSOMYG00000001753,ENSOMYG00000003321,ENSOMYG00000017817,ENSOMYG00000019951,ENSOMYG00000022528,ENSOMYG00000027207,ENSOMYG00000029221,ENSOMYG00000031800,ENSOMYG00000033325,ENSOMYG00000035735,ENSOMYG00000042181,ENSOMYG00000069397	FALSE	TRUE	18	1268	12	0.00946372	0.666667
GO:0022402	GO:BP	5.04707e-09	cell cycle process	6593	GO:0007049, GO:0009987	ENSOMYG00000000868,ENSOMYG00000004181,ENSOMYG00000004686,ENSOMYG00000005233,ENSOMYG00000006152,ENSOMYG00000015144,ENSOMYG00000015280,ENSOMYG00000015326,ENSOMYG00000016132,ENSOMYG00000016154,ENSOMYG00000017226,ENSOMYG00000018740,ENSOMYG00000019082,ENSOMYG00000019731,ENSOMYG00000019750,ENSOMYG00000019951,ENSOMYG00000022425,ENSOMYG00000023069,ENSOMYG00000030222,ENSOMYG00000032542,ENSOMYG00000033332,…	FALSE	TRUE	201	1268	38	0.0299685	0.189055
GO:0032508	GO:BP	2.94496e-07	DNA duplex unwinding	7615	GO:0032392	ENSOMYG00000001753,ENSOMYG00000004365,ENSOMYG00000022528,ENSOMYG00000029221,ENSOMYG00000031800,ENSOMYG00000033325,ENSOMYG00000035735,ENSOMYG00000042181,ENSOMYG00000046448,ENSOMYG00000069397	FALSE	TRUE	16	1268	10	0.00788644	0.625
GO:0032392	GO:BP	2.94496e-07	DNA geometric change	7543	GO:0071103	ENSOMYG00000001753,ENSOMYG00000004365,ENSOMYG00000022528,ENSOMYG00000029221,ENSOMYG00000031800,ENSOMYG00000033325,ENSOMYG00000035735,ENSOMYG00000042181,ENSOMYG00000046448,ENSOMYG00000069397	TRUE	TRUE	16	1268	10	0.00788644	0.625
GO:0000278	GO:BP	3.55661e-06	mitotic cell cycle	76	GO:0007049	ENSOMYG00000000868,ENSOMYG00000006152,ENSOMYG00000009607,ENSOMYG00000010238,ENSOMYG00000012456,ENSOMYG00000015280,ENSOMYG00000015326,ENSOMYG00000016154,ENSOMYG00000017226,ENSOMYG00000019082,ENSOMYG00000019750,ENSOMYG00000022425,ENSOMYG00000033332,ENSOMYG00000034475,ENSOMYG00000036763,ENSOMYG00000039583,ENSOMYG00000041903,ENSOMYG00000047653,ENSOMYG00000053095,ENSOMYG00000057051,ENSOMYG00000057769,…	FALSE	TRUE	118	1268	24	0.0189274	0.20339
GO:1903047	GO:BP	3.55661e-06	mitotic cell cycle process	22727	GO:0000278, GO:0022402	ENSOMYG00000000868,ENSOMYG00000006152,ENSOMYG00000015280,ENSOMYG00000015326,ENSOMYG00000016154,ENSOMYG00000017226,ENSOMYG00000019082,ENSOMYG00000019750,ENSOMYG00000022425,ENSOMYG00000033332,ENSOMYG00000034475,ENSOMYG00000036763,ENSOMYG00000039583,ENSOMYG00000047653,ENSOMYG00000053095,ENSOMYG00000057051,ENSOMYG00000057769,ENSOMYG00000058753,ENSOMYG00000064330,ENSOMYG00000074857	FALSE	TRUE	84	1268	20	0.0157729	0.238095
GO:0071103	GO:BP	1.13723e-05	DNA conformation change	16453	GO:0051276	ENSOMYG00000001753,ENSOMYG00000004365,ENSOMYG00000011026,ENSOMYG00000022528,ENSOMYG00000029221,ENSOMYG00000031800,ENSOMYG00000033325,ENSOMYG00000035735,ENSOMYG00000042181,ENSOMYG00000046448,ENSOMYG00000069397	FALSE	TRUE	27	1268	11	0.00867508	0.407407
GO:0009605	GO:BP	1.43558e-05	response to external stimulus	3533	GO:0050896	ENSOMYG00000003648,ENSOMYG00000004272,ENSOMYG00000004614,ENSOMYG00000004857,ENSOMYG00000004977,ENSOMYG00000006443,ENSOMYG00000011474,ENSOMYG00000012124,ENSOMYG00000012144,ENSOMYG00000014218,ENSOMYG00000016096,ENSOMYG00000016156,ENSOMYG00000016522,ENSOMYG00000016793,ENSOMYG00000018541,ENSOMYG00000021611,ENSOMYG00000022444,ENSOMYG00000024630,ENSOMYG00000026966,ENSOMYG00000030223,ENSOMYG00000032623,…	TRUE	TRUE	260	1268	37	0.0291798	0.142308
GO:0034508	GO:BP	4.70366e-05	centromere complex assembly	8672	GO:0051276, GO:0065004	ENSOMYG00000009450,ENSOMYG00000009607,ENSOMYG00000015326,ENSOMYG00000037483,ENSOMYG00000037794,ENSOMYG00000041611,ENSOMYG00000045611,ENSOMYG00000063548	FALSE	TRUE	15	1268	8	0.00630915	0.533333
GO:0098542	GO:BP	0.000549755	defense response to other organism	18794	GO:0006952, GO:0051707	ENSOMYG00000003648,ENSOMYG00000004272,ENSOMYG00000004614,ENSOMYG00000004857,ENSOMYG00000004977,ENSOMYG00000006443,ENSOMYG00000011474,ENSOMYG00000016096,ENSOMYG00000016156,ENSOMYG00000016522,ENSOMYG00000016793,ENSOMYG00000021611,ENSOMYG00000024630,ENSOMYG00000033023,ENSOMYG00000042230,ENSOMYG00000042923,ENSOMYG00000046585,ENSOMYG00000056737,ENSOMYG00000058751,ENSOMYG00000065268	FALSE	TRUE	117	1268	20	0.0157729	0.17094
GO:0006259	GO:BP	0.000549755	DNA metabolic process	2076	GO:0090304	ENSOMYG00000000116,ENSOMYG00000000447,ENSOMYG00000001219,ENSOMYG00000001507,ENSOMYG00000001753,ENSOMYG00000002752,ENSOMYG00000003163,ENSOMYG00000003279,ENSOMYG00000003292,ENSOMYG00000003321,ENSOMYG00000004686,ENSOMYG00000005651,ENSOMYG00000007658,ENSOMYG00000007986,ENSOMYG00000010296,ENSOMYG00000010384,ENSOMYG00000011026,ENSOMYG00000011508,ENSOMYG00000011861,ENSOMYG00000012427,ENSOMYG00000012892,…	FALSE	TRUE	3683	1268	260	0.205047	0.0705946
GO:0006955	GO:BP	0.000549755	immune response	2586	GO:0002376, GO:0050896	ENSOMYG00000002664,ENSOMYG00000004272,ENSOMYG00000004614,ENSOMYG00000004857,ENSOMYG00000004977,ENSOMYG00000005081,ENSOMYG00000005905,ENSOMYG00000011474,ENSOMYG00000012483,ENSOMYG00000014873,ENSOMYG00000015899,ENSOMYG00000016096,ENSOMYG00000016156,ENSOMYG00000016522,ENSOMYG00000016793,ENSOMYG00000017291,ENSOMYG00000018541,ENSOMYG00000021611,ENSOMYG00000022444,ENSOMYG00000026966,ENSOMYG00000030203,…	FALSE	TRUE	318	1268	38	0.0299685	0.119497
GO:0043207	GO:BP	0.000549755	response to external biotic stimulus	10576	GO:0009605, GO:0009607	ENSOMYG00000003648,ENSOMYG00000004272,ENSOMYG00000004614,ENSOMYG00000004857,ENSOMYG00000004977,ENSOMYG00000006443,ENSOMYG00000011474,ENSOMYG00000016096,ENSOMYG00000016156,ENSOMYG00000016522,ENSOMYG00000016793,ENSOMYG00000021611,ENSOMYG00000024630,ENSOMYG00000030223,ENSOMYG00000033023,ENSOMYG00000042230,ENSOMYG00000042923,ENSOMYG00000046585,ENSOMYG00000056737,ENSOMYG00000058751,ENSOMYG00000065268	FALSE	TRUE	128	1268	21	0.0165615	0.164062
GO:0044419	GO:BP	0.000549755	biological process involved in interspecies interaction between organisms	10998	GO:0008150	ENSOMYG00000003648,ENSOMYG00000004272,ENSOMYG00000004614,ENSOMYG00000004857,ENSOMYG00000004977,ENSOMYG00000006443,ENSOMYG00000011474,ENSOMYG00000016096,ENSOMYG00000016156,ENSOMYG00000016522,ENSOMYG00000016793,ENSOMYG00000021611,ENSOMYG00000024630,ENSOMYG00000030223,ENSOMYG00000031676,ENSOMYG00000033023,ENSOMYG00000042230,ENSOMYG00000042923,ENSOMYG00000046585,ENSOMYG00000056737,ENSOMYG00000058751,…	FALSE	TRUE	138	1268	22	0.0173502	0.15942
GO:0051707	GO:BP	0.000549755	response to other organism	13904	GO:0043207, GO:0044419	ENSOMYG00000003648,ENSOMYG00000004272,ENSOMYG00000004614,ENSOMYG00000004857,ENSOMYG00000004977,ENSOMYG00000006443,ENSOMYG00000011474,ENSOMYG00000016096,ENSOMYG00000016156,ENSOMYG00000016522,ENSOMYG00000016793,ENSOMYG00000021611,ENSOMYG00000024630,ENSOMYG00000030223,ENSOMYG00000033023,ENSOMYG00000042230,ENSOMYG00000042923,ENSOMYG00000046585,ENSOMYG00000056737,ENSOMYG00000058751,ENSOMYG00000065268	FALSE	TRUE	128	1268	21	0.0165615	0.164062
GO:0009607	GO:BP	0.000645454	response to biotic stimulus	3535	GO:0050896	ENSOMYG00000003648,ENSOMYG00000004272,ENSOMYG00000004614,ENSOMYG00000004857,ENSOMYG00000004977,ENSOMYG00000006443,ENSOMYG00000011474,ENSOMYG00000016096,ENSOMYG00000016156,ENSOMYG00000016522,ENSOMYG00000016793,ENSOMYG00000021611,ENSOMYG00000024630,ENSOMYG00000030223,ENSOMYG00000033023,ENSOMYG00000042230,ENSOMYG00000042923,ENSOMYG00000046585,ENSOMYG00000056737,ENSOMYG00000058751,ENSOMYG00000065268	FALSE	TRUE	130	1268	21	0.0165615	0.161538
GO:0007059	GO:BP	0.000645454	chromosome segregation	2658	GO:0022402	ENSOMYG00000000868,ENSOMYG00000006152,ENSOMYG00000015144,ENSOMYG00000015326,ENSOMYG00000016154,ENSOMYG00000018740,ENSOMYG00000019731,ENSOMYG00000023069,ENSOMYG00000033332,ENSOMYG00000041611,ENSOMYG00000053095,ENSOMYG00000057051,ENSOMYG00000058753,ENSOMYG00000063548,ENSOMYG00000074857	FALSE	TRUE	73	1268	15	0.0118297	0.205479
GO:0002376	GO:BP	0.000799769	immune system process	906	GO:0008150	ENSOMYG00000002664,ENSOMYG00000004272,ENSOMYG00000004614,ENSOMYG00000004857,ENSOMYG00000004977,ENSOMYG00000005081,ENSOMYG00000005905,ENSOMYG00000011474,ENSOMYG00000012483,ENSOMYG00000014873,ENSOMYG00000015899,ENSOMYG00000016096,ENSOMYG00000016156,ENSOMYG00000016522,ENSOMYG00000016793,ENSOMYG00000017291,ENSOMYG00000018541,ENSOMYG00000021611,ENSOMYG00000022444,ENSOMYG00000023120,ENSOMYG00000026966,…	FALSE	TRUE	364	1268	41	0.0323344	0.112637
GO:0045089	GO:BP	0.000800109	positive regulation of innate immune response	11272	GO:0002833, GO:0031349, GO:0032103, GO:0045087, GO:0045088, GO:0050778	ENSOMYG00000004272,ENSOMYG00000004977,ENSOMYG00000011474,ENSOMYG00000016156,ENSOMYG00000016522,ENSOMYG00000016793,ENSOMYG00000021611,ENSOMYG00000033023,ENSOMYG00000046585,ENSOMYG00000058751,ENSOMYG00000065268	FALSE	TRUE	42	1268	11	0.00867508	0.261905
GO:0002833	GO:BP	0.000800109	positive regulation of response to biotic stimulus	1343	GO:0002831, GO:0009607, GO:0048584	ENSOMYG00000004272,ENSOMYG00000004977,ENSOMYG00000011474,ENSOMYG00000016156,ENSOMYG00000016522,ENSOMYG00000016793,ENSOMYG00000021611,ENSOMYG00000033023,ENSOMYG00000046585,ENSOMYG00000058751,ENSOMYG00000065268	FALSE	TRUE	42	1268	11	0.00867508	0.261905
GO:0031349	GO:BP	0.000943554	positive regulation of defense response	7140	GO:0006952, GO:0031347, GO:0048584	ENSOMYG00000004272,ENSOMYG00000004977,ENSOMYG00000011474,ENSOMYG00000016156,ENSOMYG00000016522,ENSOMYG00000016793,ENSOMYG00000021611,ENSOMYG00000033023,ENSOMYG00000046585,ENSOMYG00000058751,ENSOMYG00000065268	FALSE	TRUE	43	1268	11	0.00867508	0.255814
GO:0045088	GO:BP	0.000943554	regulation of innate immune response	11271	GO:0002831, GO:0031347, GO:0032101, GO:0045087, GO:0050776	ENSOMYG00000004272,ENSOMYG00000004977,ENSOMYG00000011474,ENSOMYG00000016156,ENSOMYG00000016522,ENSOMYG00000016793,ENSOMYG00000021611,ENSOMYG00000033023,ENSOMYG00000046585,ENSOMYG00000058751,ENSOMYG00000065268	FALSE	TRUE	43	1268	11	0.00867508	0.255814
GO:0044770	GO:BP	0.00130449	cell cycle phase transition	11146	GO:0022402	ENSOMYG00000000868,ENSOMYG00000016132,ENSOMYG00000033332,ENSOMYG00000034475,ENSOMYG00000039583,ENSOMYG00000042218,ENSOMYG00000047653,ENSOMYG00000053095,ENSOMYG00000057051,ENSOMYG00000064330,ENSOMYG00000066296	FALSE	TRUE	45	1268	11	0.00867508	0.244444
GO:0002764	GO:BP	0.00130449	immune response-regulating signaling pathway	1275	GO:0007165, GO:0050776	ENSOMYG00000004272,ENSOMYG00000004977,ENSOMYG00000014873,ENSOMYG00000016156,ENSOMYG00000016522,ENSOMYG00000016793,ENSOMYG00000021611,ENSOMYG00000033023,ENSOMYG00000046585,ENSOMYG00000058751,ENSOMYG00000065268,ENSOMYG00000065373	FALSE	TRUE	53	1268	12	0.00946372	0.226415
GO:0002224	GO:BP	0.00130449	toll-like receptor signaling pathway	758	GO:0002221	ENSOMYG00000004272,ENSOMYG00000004977,ENSOMYG00000016156,ENSOMYG00000016522,ENSOMYG00000016793,ENSOMYG00000021611,ENSOMYG00000033023,ENSOMYG00000046585,ENSOMYG00000058751,ENSOMYG00000065268	FALSE	TRUE	37	1268	10	0.00788644	0.27027
GO:0002831	GO:BP	0.00130449	regulation of response to biotic stimulus	1341	GO:0009607, GO:0048583	ENSOMYG00000004272,ENSOMYG00000004977,ENSOMYG00000011474,ENSOMYG00000016156,ENSOMYG00000016522,ENSOMYG00000016793,ENSOMYG00000021611,ENSOMYG00000033023,ENSOMYG00000046585,ENSOMYG00000058751,ENSOMYG00000065268	FALSE	TRUE	45	1268	11	0.00867508	0.244444
GO:0002221	GO:BP	0.00139191	pattern recognition receptor signaling pathway	755	GO:0002758	ENSOMYG00000004272,ENSOMYG00000004977,ENSOMYG00000016156,ENSOMYG00000016522,ENSOMYG00000016793,ENSOMYG00000021611,ENSOMYG00000033023,ENSOMYG00000046585,ENSOMYG00000058751,ENSOMYG00000065268	FALSE	TRUE	38	1268	10	0.00788644	0.263158
GO:0006952	GO:BP	0.00139191	defense response	2583	GO:0006950	ENSOMYG00000003616,ENSOMYG00000003648,ENSOMYG00000004272,ENSOMYG00000004614,ENSOMYG00000004857,ENSOMYG00000004977,ENSOMYG00000006443,ENSOMYG00000011474,ENSOMYG00000016096,ENSOMYG00000016156,ENSOMYG00000016522,ENSOMYG00000016793,ENSOMYG00000018541,ENSOMYG00000020125,ENSOMYG00000021611,ENSOMYG00000022444,ENSOMYG00000024630,ENSOMYG00000032727,ENSOMYG00000033023,ENSOMYG00000042230,ENSOMYG00000042923,…	FALSE	TRUE	230	1268	29	0.0228707	0.126087
GO:0002758	GO:BP	0.00139191	innate immune response-activating signaling pathway	1269	GO:0002218, GO:0002757	ENSOMYG00000004272,ENSOMYG00000004977,ENSOMYG00000016156,ENSOMYG00000016522,ENSOMYG00000016793,ENSOMYG00000021611,ENSOMYG00000033023,ENSOMYG00000046585,ENSOMYG00000058751,ENSOMYG00000065268	FALSE	TRUE	38	1268	10	0.00788644	0.263158
GO:0007051	GO:BP	0.00144665	spindle organization	2650	GO:0000226, GO:0022402	ENSOMYG00000004181,ENSOMYG00000015326,ENSOMYG00000017226,ENSOMYG00000019082,ENSOMYG00000022425,ENSOMYG00000023069,ENSOMYG00000030222,ENSOMYG00000041944,ENSOMYG00000045084	FALSE	TRUE	31	1268	9	0.00709779	0.290323
GO:0050776	GO:BP	0.0014883	regulation of immune response	13250	GO:0002682, GO:0006955, GO:0048583	ENSOMYG00000004272,ENSOMYG00000004977,ENSOMYG00000011474,ENSOMYG00000014873,ENSOMYG00000016156,ENSOMYG00000016522,ENSOMYG00000016793,ENSOMYG00000021611,ENSOMYG00000033023,ENSOMYG00000040581,ENSOMYG00000046585,ENSOMYG00000058751,ENSOMYG00000065268,ENSOMYG00000065373	FALSE	TRUE	72	1268	14	0.011041	0.194444
GO:0000280	GO:BP	0.00159633	nuclear division	78	GO:0048285	ENSOMYG00000000868,ENSOMYG00000004686,ENSOMYG00000006152,ENSOMYG00000015144,ENSOMYG00000016154,ENSOMYG00000018740,ENSOMYG00000033332,ENSOMYG00000053095,ENSOMYG00000057051,ENSOMYG00000057769,ENSOMYG00000058753,ENSOMYG00000074857	FALSE	TRUE	55	1268	12	0.00946372	0.218182
GO:0098813	GO:BP	0.00164072	nuclear chromosome segregation	18900	GO:0007059	ENSOMYG00000000868,ENSOMYG00000006152,ENSOMYG00000015144,ENSOMYG00000016154,ENSOMYG00000018740,ENSOMYG00000019731,ENSOMYG00000033332,ENSOMYG00000053095,ENSOMYG00000057051,ENSOMYG00000058753,ENSOMYG00000074857	FALSE	TRUE	47	1268	11	0.00867508	0.234043
GO:0002218	GO:BP	0.00196092	activation of innate immune response	753	GO:0002253, GO:0045089	ENSOMYG00000004272,ENSOMYG00000004977,ENSOMYG00000016156,ENSOMYG00000016522,ENSOMYG00000016793,ENSOMYG00000021611,ENSOMYG00000033023,ENSOMYG00000046585,ENSOMYG00000058751,ENSOMYG00000065268	FALSE	TRUE	40	1268	10	0.00788644	0.25
GO:0140014	GO:BP	0.00218472	mitotic nuclear division	19633	GO:0000280, GO:1903047	ENSOMYG00000000868,ENSOMYG00000006152,ENSOMYG00000016154,ENSOMYG00000033332,ENSOMYG00000053095,ENSOMYG00000057051,ENSOMYG00000057769,ENSOMYG00000058753,ENSOMYG00000074857	FALSE	TRUE	33	1268	9	0.00709779	0.272727
GO:0032103	GO:BP	0.0022954	positive regulation of response to external stimulus	7367	GO:0009605, GO:0032101, GO:0048584	ENSOMYG00000004272,ENSOMYG00000004977,ENSOMYG00000011474,ENSOMYG00000016156,ENSOMYG00000016522,ENSOMYG00000016793,ENSOMYG00000021611,ENSOMYG00000033023,ENSOMYG00000046585,ENSOMYG00000058751,ENSOMYG00000065268	FALSE	TRUE	49	1268	11	0.00867508	0.22449
GO:0031347	GO:BP	0.00273004	regulation of defense response	7138	GO:0006952, GO:0080134	ENSOMYG00000004272,ENSOMYG00000004977,ENSOMYG00000011474,ENSOMYG00000016156,ENSOMYG00000016522,ENSOMYG00000016793,ENSOMYG00000021611,ENSOMYG00000033023,ENSOMYG00000046585,ENSOMYG00000058751,ENSOMYG00000065268	FALSE	TRUE	50	1268	11	0.00867508	0.22
GO:0051301	GO:BP	0.00310577	cell division	13632	GO:0009987	ENSOMYG00000003321,ENSOMYG00000015280,ENSOMYG00000016183,ENSOMYG00000017817,ENSOMYG00000019731,ENSOMYG00000022421,ENSOMYG00000023514,ENSOMYG00000032542,ENSOMYG00000034475,ENSOMYG00000034594,ENSOMYG00000036763,ENSOMYG00000037440,ENSOMYG00000039583,ENSOMYG00000041856,ENSOMYG00000045037,ENSOMYG00000047653	TRUE	TRUE	98	1268	16	0.0126183	0.163265
GO:0051726	GO:BP	0.00310577	regulation of cell cycle	13911	GO:0007049, GO:0050794	ENSOMYG00000000138,ENSOMYG00000000868,ENSOMYG00000002752,ENSOMYG00000010965,ENSOMYG00000012456,ENSOMYG00000016132,ENSOMYG00000017016,ENSOMYG00000017226,ENSOMYG00000019082,ENSOMYG00000030474,ENSOMYG00000031158,ENSOMYG00000031231,ENSOMYG00000032542,ENSOMYG00000033332,ENSOMYG00000042218,ENSOMYG00000046983,ENSOMYG00000053095,ENSOMYG00000057051,ENSOMYG00000057769,ENSOMYG00000064330,ENSOMYG00000066296	FALSE	TRUE	151	1268	21	0.0165615	0.139073
GO:0048285	GO:BP	0.00310577	organelle fission	12627	GO:0006996	ENSOMYG00000000868,ENSOMYG00000004686,ENSOMYG00000006152,ENSOMYG00000015144,ENSOMYG00000016154,ENSOMYG00000018740,ENSOMYG00000030285,ENSOMYG00000033332,ENSOMYG00000053095,ENSOMYG00000057051,ENSOMYG00000057769,ENSOMYG00000058753,ENSOMYG00000074857	FALSE	TRUE	69	1268	13	0.0102524	0.188406
GO:0006996	GO:BP	0.00310577	organelle organization	2611	GO:0016043	ENSOMYG00000000815,ENSOMYG00000000868,ENSOMYG00000001352,ENSOMYG00000001753,ENSOMYG00000001986,ENSOMYG00000003740,ENSOMYG00000004181,ENSOMYG00000004291,ENSOMYG00000004365,ENSOMYG00000004686,ENSOMYG00000005233,ENSOMYG00000005576,ENSOMYG00000006152,ENSOMYG00000009450,ENSOMYG00000009607,ENSOMYG00000011026,ENSOMYG00000015144,ENSOMYG00000015280,ENSOMYG00000015326,ENSOMYG00000016154,ENSOMYG00000016610,…	FALSE	TRUE	874	1268	75	0.0591483	0.0858124
GO:0000070	GO:BP	0.00331376	mitotic sister chromatid segregation	24	GO:0000819, GO:0140014, GO:1903047	ENSOMYG00000000868,ENSOMYG00000006152,ENSOMYG00000016154,ENSOMYG00000033332,ENSOMYG00000053095,ENSOMYG00000057051,ENSOMYG00000058753,ENSOMYG00000074857	FALSE	TRUE	28	1268	8	0.00630915	0.285714
GO:0140546	GO:BP	0.00331376	defense response to symbiont	19820	GO:0098542	ENSOMYG00000004272,ENSOMYG00000004614,ENSOMYG00000004857,ENSOMYG00000004977,ENSOMYG00000011474,ENSOMYG00000016096,ENSOMYG00000016156,ENSOMYG00000016522,ENSOMYG00000016793,ENSOMYG00000021611,ENSOMYG00000024630,ENSOMYG00000033023,ENSOMYG00000042230,ENSOMYG00000046585,ENSOMYG00000058751,ENSOMYG00000065268	FALSE	TRUE	99	1268	16	0.0126183	0.161616
GO:0000819	GO:BP	0.00426662	sister chromatid segregation	237	GO:0051276, GO:0098813	ENSOMYG00000000868,ENSOMYG00000006152,ENSOMYG00000016154,ENSOMYG00000033332,ENSOMYG00000053095,ENSOMYG00000057051,ENSOMYG00000058753,ENSOMYG00000074857	FALSE	TRUE	29	1268	8	0.00630915	0.275862
GO:0034975	GO:BP	0.00564986	protein folding in endoplasmic reticulum	8745	GO:0006457	ENSOMYG00000017134,ENSOMYG00000026585,ENSOMYG00000038152	TRUE	TRUE	3	1268	3	0.00236593	1
GO:0045087	GO:BP	0.00589313	innate immune response	11270	GO:0006955, GO:0140546	ENSOMYG00000004272,ENSOMYG00000004614,ENSOMYG00000004857,ENSOMYG00000004977,ENSOMYG00000011474,ENSOMYG00000016096,ENSOMYG00000016156,ENSOMYG00000016522,ENSOMYG00000016793,ENSOMYG00000021611,ENSOMYG00000033023,ENSOMYG00000042230,ENSOMYG00000046585,ENSOMYG00000058751,ENSOMYG00000065268	FALSE	TRUE	94	1268	15	0.0118297	0.159574
GO:0002757	GO:BP	0.00628925	immune response-activating signaling pathway	1268	GO:0002253, GO:0002764	ENSOMYG00000004272,ENSOMYG00000004977,ENSOMYG00000016156,ENSOMYG00000016522,ENSOMYG00000016793,ENSOMYG00000021611,ENSOMYG00000033023,ENSOMYG00000046585,ENSOMYG00000058751,ENSOMYG00000065268	FALSE	TRUE	47	1268	10	0.00788644	0.212766
GO:0032501	GO:BP	0.00628925	multicellular organismal process	7611	GO:0008150	ENSOMYG00000000423,ENSOMYG00000001507,ENSOMYG00000005025,ENSOMYG00000005081,ENSOMYG00000006284,ENSOMYG00000008889,ENSOMYG00000011474,ENSOMYG00000011528,ENSOMYG00000011661,ENSOMYG00000012048,ENSOMYG00000012456,ENSOMYG00000013943,ENSOMYG00000014218,ENSOMYG00000014370,ENSOMYG00000015062,ENSOMYG00000015548,ENSOMYG00000015927,ENSOMYG00000016034,ENSOMYG00000016694,ENSOMYG00000017239,ENSOMYG00000017658,…	TRUE	TRUE	1094	1268	88	0.0694006	0.0804388
GO:0006935	GO:BP	0.0063128	chemotaxis	2574	GO:0042221, GO:0042330	ENSOMYG00000012124,ENSOMYG00000012144,ENSOMYG00000018541,ENSOMYG00000022444,ENSOMYG00000026966,ENSOMYG00000032623,ENSOMYG00000032727,ENSOMYG00000042957,ENSOMYG00000044687,ENSOMYG00000051465,ENSOMYG00000052953,ENSOMYG00000062182,ENSOMYG00000066326,ENSOMYG00000069047	FALSE	TRUE	85	1268	14	0.011041	0.164706
GO:0042330	GO:BP	0.0063128	taxis	10096	GO:0009605, GO:0040011	ENSOMYG00000012124,ENSOMYG00000012144,ENSOMYG00000018541,ENSOMYG00000022444,ENSOMYG00000026966,ENSOMYG00000032623,ENSOMYG00000032727,ENSOMYG00000042957,ENSOMYG00000044687,ENSOMYG00000051465,ENSOMYG00000052953,ENSOMYG00000062182,ENSOMYG00000066326,ENSOMYG00000069047	FALSE	TRUE	85	1268	14	0.011041	0.164706
GO:0010564	GO:BP	0.00671934	regulation of cell cycle process	4217	GO:0022402, GO:0051726	ENSOMYG00000000868,ENSOMYG00000016132,ENSOMYG00000017226,ENSOMYG00000019082,ENSOMYG00000032542,ENSOMYG00000033332,ENSOMYG00000042218,ENSOMYG00000053095,ENSOMYG00000057051,ENSOMYG00000057769,ENSOMYG00000064330,ENSOMYG00000066296	FALSE	TRUE	66	1268	12	0.00946372	0.181818
GO:0006310	GO:BP	0.00756713	DNA recombination	2115	GO:0006259	ENSOMYG00000000116,ENSOMYG00000004686,ENSOMYG00000007658,ENSOMYG00000011508,ENSOMYG00000011861,ENSOMYG00000012427,ENSOMYG00000012892,ENSOMYG00000013588,ENSOMYG00000019128,ENSOMYG00000019750,ENSOMYG00000021025,ENSOMYG00000022740,ENSOMYG00000023525,ENSOMYG00000025026,ENSOMYG00000026853,ENSOMYG00000027536,ENSOMYG00000030168,ENSOMYG00000030943,ENSOMYG00000031478,ENSOMYG00000033986,ENSOMYG00000040256,…	FALSE	TRUE	2286	1268	163	0.128549	0.0713036
GO:0055085	GO:BP	0.00825749	transmembrane transport	14236	GO:0006810, GO:0009987	ENSOMYG00000000638,ENSOMYG00000000807,ENSOMYG00000001367,ENSOMYG00000003774,ENSOMYG00000004443,ENSOMYG00000004858,ENSOMYG00000005354,ENSOMYG00000005515,ENSOMYG00000005667,ENSOMYG00000006019,ENSOMYG00000006320,ENSOMYG00000006681,ENSOMYG00000007086,ENSOMYG00000007510,ENSOMYG00000007708,ENSOMYG00000008646,ENSOMYG00000008952,ENSOMYG00000009464,ENSOMYG00000009933,ENSOMYG00000010100,ENSOMYG00000010421,…	TRUE	TRUE	1509	1268	114	0.0899054	0.0755467
GO:1902850	GO:BP	0.00825749	microtubule cytoskeleton organization involved in mitosis	22560	GO:0000226, GO:1903047	ENSOMYG00000015280,ENSOMYG00000015326,ENSOMYG00000017226,ENSOMYG00000019082,ENSOMYG00000022425,ENSOMYG00000036763	FALSE	TRUE	18	1268	6	0.00473186	0.333333
GO:0050778	GO:BP	0.00904377	positive regulation of immune response	13252	GO:0002684, GO:0006955, GO:0048584, GO:0050776	ENSOMYG00000004272,ENSOMYG00000004977,ENSOMYG00000011474,ENSOMYG00000016156,ENSOMYG00000016522,ENSOMYG00000016793,ENSOMYG00000021611,ENSOMYG00000033023,ENSOMYG00000046585,ENSOMYG00000058751,ENSOMYG00000065268	FALSE	TRUE	59	1268	11	0.00867508	0.186441
GO:0044772	GO:BP	0.0107498	mitotic cell cycle phase transition	11148	GO:0044770, GO:1903047	ENSOMYG00000000868,ENSOMYG00000033332,ENSOMYG00000034475,ENSOMYG00000039583,ENSOMYG00000047653,ENSOMYG00000053095,ENSOMYG00000057051	FALSE	TRUE	26	1268	7	0.0055205	0.269231
GO:0010948	GO:BP	0.0111231	negative regulation of cell cycle process	4526	GO:0010564, GO:0022402, GO:0045786	ENSOMYG00000000868,ENSOMYG00000016132,ENSOMYG00000033332,ENSOMYG00000042218,ENSOMYG00000053095,ENSOMYG00000057051,ENSOMYG00000057769,ENSOMYG00000064330	FALSE	TRUE	34	1268	8	0.00630915	0.235294
GO:0002682	GO:BP	0.0127656	regulation of immune system process	1200	GO:0002376, GO:0050789	ENSOMYG00000004272,ENSOMYG00000004977,ENSOMYG00000011474,ENSOMYG00000014873,ENSOMYG00000016156,ENSOMYG00000016522,ENSOMYG00000016793,ENSOMYG00000021611,ENSOMYG00000033023,ENSOMYG00000040581,ENSOMYG00000046585,ENSOMYG00000058751,ENSOMYG00000065268,ENSOMYG00000065373	FALSE	TRUE	92	1268	14	0.011041	0.152174
GO:0032196	GO:BP	0.0133434	transposition	7390	GO:0009987	ENSOMYG00000011508,ENSOMYG00000011861,ENSOMYG00000012892,ENSOMYG00000013588,ENSOMYG00000019128,ENSOMYG00000021025,ENSOMYG00000022740,ENSOMYG00000023525,ENSOMYG00000025026,ENSOMYG00000026853,ENSOMYG00000027536,ENSOMYG00000030168,ENSOMYG00000031478,ENSOMYG00000033986,ENSOMYG00000040256,ENSOMYG00000040264,ENSOMYG00000041719,ENSOMYG00000043449,ENSOMYG00000043602,ENSOMYG00000045484,ENSOMYG00000048074,…	FALSE	TRUE	2223	1268	157	0.123817	0.0706253
GO:0006313	GO:BP	0.0133434	DNA transposition	2118	GO:0006310, GO:0032196	ENSOMYG00000011508,ENSOMYG00000011861,ENSOMYG00000012892,ENSOMYG00000013588,ENSOMYG00000019128,ENSOMYG00000021025,ENSOMYG00000022740,ENSOMYG00000023525,ENSOMYG00000025026,ENSOMYG00000026853,ENSOMYG00000027536,ENSOMYG00000030168,ENSOMYG00000031478,ENSOMYG00000033986,ENSOMYG00000040256,ENSOMYG00000040264,ENSOMYG00000041719,ENSOMYG00000043449,ENSOMYG00000043602,ENSOMYG00000045484,ENSOMYG00000048074,…	FALSE	TRUE	2223	1268	157	0.123817	0.0706253
GO:0045786	GO:BP	0.0139896	negative regulation of cell cycle	11618	GO:0007049, GO:0048523, GO:0051726	ENSOMYG00000000868,ENSOMYG00000012456,ENSOMYG00000016132,ENSOMYG00000033332,ENSOMYG00000042218,ENSOMYG00000053095,ENSOMYG00000057051,ENSOMYG00000057769,ENSOMYG00000064330	FALSE	TRUE	44	1268	9	0.00709779	0.204545
GO:0002684	GO:BP	0.0145589	positive regulation of immune system process	1202	GO:0002376, GO:0002682, GO:0048518	ENSOMYG00000004272,ENSOMYG00000004977,ENSOMYG00000011474,ENSOMYG00000016156,ENSOMYG00000016522,ENSOMYG00000016793,ENSOMYG00000021611,ENSOMYG00000033023,ENSOMYG00000046585,ENSOMYG00000058751,ENSOMYG00000065268	FALSE	TRUE	63	1268	11	0.00867508	0.174603
GO:1901987	GO:BP	0.0153106	regulation of cell cycle phase transition	21920	GO:0010564, GO:0044770	ENSOMYG00000000868,ENSOMYG00000016132,ENSOMYG00000033332,ENSOMYG00000042218,ENSOMYG00000053095,ENSOMYG00000057051,ENSOMYG00000064330,ENSOMYG00000066296	FALSE	TRUE	36	1268	8	0.00630915	0.222222
GO:0000075	GO:BP	0.0155079	cell cycle checkpoint signaling	26	GO:0035556, GO:1901988	ENSOMYG00000000868,ENSOMYG00000016132,ENSOMYG00000033332,ENSOMYG00000042218,ENSOMYG00000053095,ENSOMYG00000057051,ENSOMYG00000064330	FALSE	TRUE	28	1268	7	0.0055205	0.25
GO:0051784	GO:BP	0.0155452	negative regulation of nuclear division	13934	GO:0000280, GO:0010639, GO:0051783	ENSOMYG00000000868,ENSOMYG00000033332,ENSOMYG00000053095,ENSOMYG00000057051,ENSOMYG00000057769	FALSE	TRUE	14	1268	5	0.00394322	0.357143
GO:0032101	GO:BP	0.0155452	regulation of response to external stimulus	7365	GO:0009605, GO:0048583	ENSOMYG00000004272,ENSOMYG00000004977,ENSOMYG00000011474,ENSOMYG00000016156,ENSOMYG00000016522,ENSOMYG00000016793,ENSOMYG00000021611,ENSOMYG00000033023,ENSOMYG00000046585,ENSOMYG00000058751,ENSOMYG00000065268	FALSE	TRUE	64	1268	11	0.00867508	0.171875
GO:0040011	GO:BP	0.0155452	locomotion	9899	GO:0008150	ENSOMYG00000012124,ENSOMYG00000012144,ENSOMYG00000018541,ENSOMYG00000022444,ENSOMYG00000023874,ENSOMYG00000026966,ENSOMYG00000032623,ENSOMYG00000032727,ENSOMYG00000042957,ENSOMYG00000044194,ENSOMYG00000044687,ENSOMYG00000051465,ENSOMYG00000052953,ENSOMYG00000062182,ENSOMYG00000066326,ENSOMYG00000069047	FALSE	TRUE	117	1268	16	0.0126183	0.136752
GO:1901988	GO:BP	0.0184015	negative regulation of cell cycle phase transition	21921	GO:0010948, GO:0044770, GO:1901987	ENSOMYG00000000868,ENSOMYG00000016132,ENSOMYG00000033332,ENSOMYG00000042218,ENSOMYG00000053095,ENSOMYG00000057051,ENSOMYG00000064330	FALSE	TRUE	29	1268	7	0.0055205	0.241379
GO:0034329	GO:BP	0.0212971	cell junction assembly	8571	GO:0022607, GO:0034330	ENSOMYG00000005025,ENSOMYG00000037246,ENSOMYG00000040679,ENSOMYG00000041412,ENSOMYG00000046368,ENSOMYG00000046373	TRUE	TRUE	22	1268	6	0.00473186	0.272727
GO:0007275	GO:BP	0.0212971	multicellular organism development	2802	GO:0032501, GO:0048856	ENSOMYG00000001507,ENSOMYG00000005025,ENSOMYG00000006284,ENSOMYG00000008889,ENSOMYG00000011528,ENSOMYG00000011661,ENSOMYG00000012048,ENSOMYG00000012456,ENSOMYG00000013943,ENSOMYG00000015062,ENSOMYG00000015548,ENSOMYG00000016034,ENSOMYG00000016694,ENSOMYG00000017239,ENSOMYG00000017658,ENSOMYG00000019097,ENSOMYG00000020185,ENSOMYG00000021913,ENSOMYG00000023590,ENSOMYG00000025960,ENSOMYG00000028341,…	FALSE	TRUE	708	1268	59	0.04653	0.0833333
GO:0002253	GO:BP	0.0217033	activation of immune response	785	GO:0002376, GO:0050778	ENSOMYG00000004272,ENSOMYG00000004977,ENSOMYG00000016156,ENSOMYG00000016522,ENSOMYG00000016793,ENSOMYG00000021611,ENSOMYG00000033023,ENSOMYG00000046585,ENSOMYG00000058751,ENSOMYG00000065268	FALSE	TRUE	57	1268	10	0.00788644	0.175439
GO:0048731	GO:BP	0.0227551	system development	12988	GO:0007275, GO:0048856	ENSOMYG00000001507,ENSOMYG00000005025,ENSOMYG00000006284,ENSOMYG00000008889,ENSOMYG00000011528,ENSOMYG00000011661,ENSOMYG00000012456,ENSOMYG00000015062,ENSOMYG00000016034,ENSOMYG00000016694,ENSOMYG00000017239,ENSOMYG00000019097,ENSOMYG00000020185,ENSOMYG00000021913,ENSOMYG00000023590,ENSOMYG00000028341,ENSOMYG00000029978,ENSOMYG00000034752,ENSOMYG00000036024,ENSOMYG00000037246,ENSOMYG00000037340,…	FALSE	TRUE	478	1268	43	0.0339117	0.0899582
GO:0051783	GO:BP	0.0275054	regulation of nuclear division	13933	GO:0000280, GO:0033043	ENSOMYG00000000868,ENSOMYG00000033332,ENSOMYG00000053095,ENSOMYG00000057051,ENSOMYG00000057769	FALSE	TRUE	16	1268	5	0.00394322	0.3125
GO:0007093	GO:BP	0.0275054	mitotic cell cycle checkpoint signaling	2676	GO:0000075, GO:0045930, GO:1903047	ENSOMYG00000000868,ENSOMYG00000033332,ENSOMYG00000053095,ENSOMYG00000057051,ENSOMYG00000064330	FALSE	TRUE	16	1268	5	0.00394322	0.3125
GO:0007088	GO:BP	0.0275054	regulation of mitotic nuclear division	2673	GO:0007346, GO:0010564, GO:0051783, GO:0140014	ENSOMYG00000000868,ENSOMYG00000033332,ENSOMYG00000053095,ENSOMYG00000057051,ENSOMYG00000057769	FALSE	TRUE	16	1268	5	0.00394322	0.3125
GO:0051963	GO:BP	0.03669	regulation of synapse assembly	14032	GO:0007416, GO:0050807, GO:1901888	ENSOMYG00000005025,ENSOMYG00000037246,ENSOMYG00000040679,ENSOMYG00000046368,ENSOMYG00000046373	FALSE	TRUE	18	1268	5	0.00394322	0.277778
GO:0051306	GO:BP	0.03669	mitotic sister chromatid separation	13637	GO:0000070, GO:0051304, GO:1903047	ENSOMYG00000000868,ENSOMYG00000033332,ENSOMYG00000053095,ENSOMYG00000057051	FALSE	TRUE	11	1268	4	0.00315457	0.363636
GO:0051985	GO:BP	0.03669	negative regulation of chromosome segregation	14047	GO:0007059, GO:0010948, GO:0051983	ENSOMYG00000000868,ENSOMYG00000033332,ENSOMYG00000053095,ENSOMYG00000057051	FALSE	TRUE	11	1268	4	0.00315457	0.363636
GO:0051304	GO:BP	0.03669	chromosome separation	13635	GO:0007059, GO:0022402	ENSOMYG00000000868,ENSOMYG00000033332,ENSOMYG00000053095,ENSOMYG00000057051	FALSE	TRUE	11	1268	4	0.00315457	0.363636
GO:0010965	GO:BP	0.03669	regulation of mitotic sister chromatid separation	4541	GO:0051306, GO:1905818	ENSOMYG00000000868,ENSOMYG00000033332,ENSOMYG00000053095,ENSOMYG00000057051	FALSE	TRUE	11	1268	4	0.00315457	0.363636
GO:0071174	GO:BP	0.03669	mitotic spindle checkpoint signaling	16470	GO:0007093, GO:0031577	ENSOMYG00000000868,ENSOMYG00000033332,ENSOMYG00000053095,ENSOMYG00000057051	FALSE	TRUE	11	1268	4	0.00315457	0.363636
GO:0099054	GO:BP	0.03669	presynapse assembly	19026	GO:0007416, GO:0022607, GO:0099172	ENSOMYG00000005025,ENSOMYG00000037246,ENSOMYG00000040679,ENSOMYG00000046368,ENSOMYG00000046373	FALSE	TRUE	18	1268	5	0.00394322	0.277778
GO:0099172	GO:BP	0.03669	presynapse organization	19080	GO:0016043, GO:0050808	ENSOMYG00000005025,ENSOMYG00000037246,ENSOMYG00000040679,ENSOMYG00000046368,ENSOMYG00000046373	FALSE	TRUE	18	1268	5	0.00394322	0.277778
GO:0099174	GO:BP	0.03669	regulation of presynapse organization	19082	GO:0050807, GO:0099172	ENSOMYG00000005025,ENSOMYG00000037246,ENSOMYG00000040679,ENSOMYG00000046368,ENSOMYG00000046373	FALSE	TRUE	18	1268	5	0.00394322	0.277778
GO:0007017	GO:BP	0.03669	microtubule-based process	2625	GO:0009987	ENSOMYG00000001986,ENSOMYG00000004181,ENSOMYG00000007742,ENSOMYG00000007756,ENSOMYG00000012149,ENSOMYG00000015280,ENSOMYG00000015326,ENSOMYG00000017226,ENSOMYG00000019082,ENSOMYG00000021709,ENSOMYG00000021772,ENSOMYG00000022425,ENSOMYG00000022521,ENSOMYG00000023069,ENSOMYG00000023590,ENSOMYG00000027484,ENSOMYG00000028583,ENSOMYG00000030222,ENSOMYG00000031371,ENSOMYG00000036763,ENSOMYG00000038405,…	TRUE	TRUE	365	1268	34	0.0268139	0.0931507
GO:1901888	GO:BP	0.03669	regulation of cell junction assembly	21832	GO:0034329, GO:0044087, GO:0051128	ENSOMYG00000005025,ENSOMYG00000037246,ENSOMYG00000040679,ENSOMYG00000046368,ENSOMYG00000046373	FALSE	TRUE	18	1268	5	0.00394322	0.277778
GO:0071173	GO:BP	0.03669	spindle assembly checkpoint signaling	16469	GO:0031577	ENSOMYG00000000868,ENSOMYG00000033332,ENSOMYG00000053095,ENSOMYG00000057051	FALSE	TRUE	11	1268	4	0.00315457	0.363636
GO:0050803	GO:BP	0.03669	regulation of synapse structure or activity	13269	GO:0065008	ENSOMYG00000005025,ENSOMYG00000037246,ENSOMYG00000040679,ENSOMYG00000046368,ENSOMYG00000046373	FALSE	TRUE	18	1268	5	0.00394322	0.277778
GO:0050807	GO:BP	0.03669	regulation of synapse organization	13273	GO:0050803, GO:0050808, GO:0051128	ENSOMYG00000005025,ENSOMYG00000037246,ENSOMYG00000040679,ENSOMYG00000046368,ENSOMYG00000046373	FALSE	TRUE	18	1268	5	0.00394322	0.277778
GO:2000816	GO:BP	0.03669	negative regulation of mitotic sister chromatid separation	26071	GO:0010965, GO:0033048, GO:0051306, GO:1905819	ENSOMYG00000000868,ENSOMYG00000033332,ENSOMYG00000053095,ENSOMYG00000057051	FALSE	TRUE	11	1268	4	0.00315457	0.363636
GO:0007094	GO:BP	0.03669	mitotic spindle assembly checkpoint signaling	2677	GO:0045841, GO:0071173, GO:0071174	ENSOMYG00000000868,ENSOMYG00000033332,ENSOMYG00000053095,ENSOMYG00000057051	FALSE	TRUE	11	1268	4	0.00315457	0.363636
GO:0033046	GO:BP	0.03669	negative regulation of sister chromatid segregation	8001	GO:0000819, GO:0033045, GO:0051985, GO:2001251	ENSOMYG00000000868,ENSOMYG00000033332,ENSOMYG00000053095,ENSOMYG00000057051	FALSE	TRUE	11	1268	4	0.00315457	0.363636
GO:0033047	GO:BP	0.03669	regulation of mitotic sister chromatid segregation	8002	GO:0000070, GO:0033045	ENSOMYG00000000868,ENSOMYG00000033332,ENSOMYG00000053095,ENSOMYG00000057051	FALSE	TRUE	11	1268	4	0.00315457	0.363636
GO:0033048	GO:BP	0.03669	negative regulation of mitotic sister chromatid segregation	8003	GO:0000070, GO:0033046, GO:0033047	ENSOMYG00000000868,ENSOMYG00000033332,ENSOMYG00000053095,ENSOMYG00000057051	FALSE	TRUE	11	1268	4	0.00315457	0.363636
GO:2001251	GO:BP	0.03669	negative regulation of chromosome organization	26440	GO:0010639, GO:0033044, GO:0051276	ENSOMYG00000000868,ENSOMYG00000033332,ENSOMYG00000053095,ENSOMYG00000057051	FALSE	TRUE	11	1268	4	0.00315457	0.363636
GO:0031577	GO:BP	0.03669	spindle checkpoint signaling	7223	GO:0000075	ENSOMYG00000000868,ENSOMYG00000033332,ENSOMYG00000053095,ENSOMYG00000057051	FALSE	TRUE	11	1268	4	0.00315457	0.363636
GO:1905606	GO:BP	0.03669	regulation of presynapse assembly	24764	GO:0051963, GO:0099054, GO:0099174	ENSOMYG00000005025,ENSOMYG00000037246,ENSOMYG00000040679,ENSOMYG00000046368,ENSOMYG00000046373	FALSE	TRUE	18	1268	5	0.00394322	0.277778
GO:0045839	GO:BP	0.03669	negative regulation of mitotic nuclear division	11655	GO:0007088, GO:0010948, GO:0045930, GO:0051784, GO:0140014	ENSOMYG00000000868,ENSOMYG00000033332,ENSOMYG00000053095,ENSOMYG00000057051	FALSE	TRUE	11	1268	4	0.00315457	0.363636
GO:1902100	GO:BP	0.03669	negative regulation of metaphase/anaphase transition of cell cycle	22014	GO:0044784, GO:1901988, GO:1902099	ENSOMYG00000000868,ENSOMYG00000033332,ENSOMYG00000053095,ENSOMYG00000057051	FALSE	TRUE	11	1268	4	0.00315457	0.363636
GO:1905818	GO:BP	0.03669	regulation of chromosome separation	24928	GO:0051304, GO:0051983	ENSOMYG00000000868,ENSOMYG00000033332,ENSOMYG00000053095,ENSOMYG00000057051	FALSE	TRUE	11	1268	4	0.00315457	0.363636
GO:1905819	GO:BP	0.03669	negative regulation of chromosome separation	24929	GO:0051304, GO:0051985, GO:1905818	ENSOMYG00000000868,ENSOMYG00000033332,ENSOMYG00000053095,ENSOMYG00000057051	FALSE	TRUE	11	1268	4	0.00315457	0.363636
GO:0045841	GO:BP	0.03669	negative regulation of mitotic metaphase/anaphase transition	11657	GO:0007091, GO:0030071, GO:0045839, GO:1901991, GO:1902100, GO:2000816	ENSOMYG00000000868,ENSOMYG00000033332,ENSOMYG00000053095,ENSOMYG00000057051	FALSE	TRUE	11	1268	4	0.00315457	0.363636
GO:0034330	GO:BP	0.0376613	cell junction organization	8572	GO:0016043	ENSOMYG00000005025,ENSOMYG00000037246,ENSOMYG00000040679,ENSOMYG00000041412,ENSOMYG00000046368,ENSOMYG00000046373	FALSE	TRUE	26	1268	6	0.00473186	0.230769
GO:0015074	GO:BP	0.0419443	DNA integration	4796	GO:0006259	ENSOMYG00000000447,ENSOMYG00000003279,ENSOMYG00000003292,ENSOMYG00000011508,ENSOMYG00000011861,ENSOMYG00000012892,ENSOMYG00000013236,ENSOMYG00000013588,ENSOMYG00000019128,ENSOMYG00000021025,ENSOMYG00000022740,ENSOMYG00000023525,ENSOMYG00000025026,ENSOMYG00000026853,ENSOMYG00000027101,ENSOMYG00000027536,ENSOMYG00000030168,ENSOMYG00000031188,ENSOMYG00000031478,ENSOMYG00000033986,ENSOMYG00000034180,…	FALSE	TRUE	3304	1268	216	0.170347	0.0653753
GO:0033044	GO:BP	0.0434207	regulation of chromosome organization	7999	GO:0033043, GO:0051276	ENSOMYG00000000868,ENSOMYG00000033332,ENSOMYG00000053095,ENSOMYG00000057051	FALSE	TRUE	12	1268	4	0.00315457	0.333333
GO:0033045	GO:BP	0.0434207	regulation of sister chromatid segregation	8000	GO:0000819, GO:0033044, GO:0051983	ENSOMYG00000000868,ENSOMYG00000033332,ENSOMYG00000053095,ENSOMYG00000057051	FALSE	TRUE	12	1268	4	0.00315457	0.333333
GO:1900449	GO:BP	0.0434207	regulation of glutamate receptor signaling pathway	20668	GO:0007215, GO:0009966	ENSOMYG00000030900,ENSOMYG00000062988	TRUE	TRUE	2	1268	2	0.00157729	1
GO:0007091	GO:BP	0.0434207	metaphase/anaphase transition of mitotic cell cycle	2675	GO:0044772, GO:0044784	ENSOMYG00000000868,ENSOMYG00000033332,ENSOMYG00000053095,ENSOMYG00000057051	FALSE	TRUE	12	1268	4	0.00315457	0.333333
GO:0051983	GO:BP	0.0434207	regulation of chromosome segregation	14045	GO:0007059, GO:0010564	ENSOMYG00000000868,ENSOMYG00000033332,ENSOMYG00000053095,ENSOMYG00000057051	FALSE	TRUE	12	1268	4	0.00315457	0.333333
GO:0008016	GO:BP	0.0434207	regulation of heart contraction	3097	GO:0060047, GO:1903522	ENSOMYG00000014370,ENSOMYG00000016034,ENSOMYG00000067625	FALSE	TRUE	6	1268	3	0.00236593	0.5
GO:0045930	GO:BP	0.0434207	negative regulation of mitotic cell cycle	11724	GO:0000278, GO:0007346, GO:0045786	ENSOMYG00000000868,ENSOMYG00000012456,ENSOMYG00000033332,ENSOMYG00000053095,ENSOMYG00000057051,ENSOMYG00000064330	FALSE	TRUE	27	1268	6	0.00473186	0.222222
GO:0086065	GO:BP	0.0434207	cell communication involved in cardiac conduction	17919	GO:0007154, GO:0061337	ENSOMYG00000016034,ENSOMYG00000067625	FALSE	TRUE	2	1268	2	0.00157729	1
GO:0086019	GO:BP	0.0434207	cell-cell signaling involved in cardiac conduction	17893	GO:0007267, GO:0086065	ENSOMYG00000016034,ENSOMYG00000067625	FALSE	TRUE	2	1268	2	0.00157729	1
GO:0044784	GO:BP	0.0434207	metaphase/anaphase transition of cell cycle	11156	GO:0033045, GO:0044770	ENSOMYG00000000868,ENSOMYG00000033332,ENSOMYG00000053095,ENSOMYG00000057051	FALSE	TRUE	12	1268	4	0.00315457	0.333333
GO:0061337	GO:BP	0.0434207	cardiac conduction	15419	GO:0008016	ENSOMYG00000016034,ENSOMYG00000067625	TRUE	TRUE	2	1268	2	0.00157729	1
GO:0030071	GO:BP	0.0434207	regulation of mitotic metaphase/anaphase transition	6671	GO:0007091, GO:1901990, GO:1902099	ENSOMYG00000000868,ENSOMYG00000033332,ENSOMYG00000053095,ENSOMYG00000057051	FALSE	TRUE	12	1268	4	0.00315457	0.333333
GO:1902099	GO:BP	0.0434207	regulation of metaphase/anaphase transition of cell cycle	22013	GO:0033045, GO:0044784, GO:1901987	ENSOMYG00000000868,ENSOMYG00000033332,ENSOMYG00000053095,ENSOMYG00000057051	FALSE	TRUE	12	1268	4	0.00315457	0.333333
GO:0048856	GO:BP	0.0474395	anatomical structure development	13100	GO:0032502	ENSOMYG00000001507,ENSOMYG00000005025,ENSOMYG00000006284,ENSOMYG00000008889,ENSOMYG00000011528,ENSOMYG00000011661,ENSOMYG00000011840,ENSOMYG00000012048,ENSOMYG00000012456,ENSOMYG00000013943,ENSOMYG00000014098,ENSOMYG00000015062,ENSOMYG00000015548,ENSOMYG00000016034,ENSOMYG00000016694,ENSOMYG00000017239,ENSOMYG00000017658,ENSOMYG00000019097,ENSOMYG00000020185,ENSOMYG00000021913,ENSOMYG00000023120,…	FALSE	TRUE	873	1268	67	0.0528391	0.0767468
GO:0030001	GO:BP	0.0491399	metal ion transport	6646	GO:0006812	ENSOMYG00000002665,ENSOMYG00000003774,ENSOMYG00000003827,ENSOMYG00000005354,ENSOMYG00000008139,ENSOMYG00000008952,ENSOMYG00000010100,ENSOMYG00000010421,ENSOMYG00000012991,ENSOMYG00000013424,ENSOMYG00000014354,ENSOMYG00000017847,ENSOMYG00000018924,ENSOMYG00000019093,ENSOMYG00000019684,ENSOMYG00000019964,ENSOMYG00000020212,ENSOMYG00000020219,ENSOMYG00000021414,ENSOMYG00000023455,ENSOMYG00000025525,…	TRUE	TRUE	630	1268	51	0.0402208	0.0809524
GO:0016020	GO:CC	8.78577e-17	membrane	700	GO:0110165	ENSOMYG00000000423,ENSOMYG00000000516,ENSOMYG00000000538,ENSOMYG00000000638,ENSOMYG00000000807,ENSOMYG00000000957,ENSOMYG00000001173,ENSOMYG00000001367,ENSOMYG00000001673,ENSOMYG00000002664,ENSOMYG00000002665,ENSOMYG00000003084,ENSOMYG00000003152,ENSOMYG00000003301,ENSOMYG00000003612,ENSOMYG00000003741,ENSOMYG00000003774,ENSOMYG00000003827,ENSOMYG00000003894,ENSOMYG00000004014,ENSOMYG00000004272,…	TRUE	TRUE	6972	791	387	0.489254	0.0555077
GO:0099080	GO:CC	1.80806e-09	supramolecular complex	3282	GO:0110165	ENSOMYG00000007742,ENSOMYG00000008207,ENSOMYG00000008671,ENSOMYG00000008691,ENSOMYG00000009450,ENSOMYG00000009607,ENSOMYG00000010157,ENSOMYG00000015280,ENSOMYG00000015326,ENSOMYG00000016154,ENSOMYG00000017226,ENSOMYG00000018528,ENSOMYG00000019082,ENSOMYG00000021709,ENSOMYG00000021772,ENSOMYG00000022421,ENSOMYG00000023514,ENSOMYG00000023590,ENSOMYG00000028916,ENSOMYG00000029399,ENSOMYG00000031371,…	TRUE	TRUE	292	791	39	0.0493047	0.133562
GO:0042555	GO:CC	7.03248e-08	MCM complex	1754	GO:0032991	ENSOMYG00000001753,ENSOMYG00000022528,ENSOMYG00000029221,ENSOMYG00000031800,ENSOMYG00000033325,ENSOMYG00000035735,ENSOMYG00000042181,ENSOMYG00000069397	TRUE	TRUE	11	791	8	0.0101138	0.727273
GO:0000775	GO:CC	4.76491e-07	chromosome, centromeric region	83	GO:0098687	ENSOMYG00000009450,ENSOMYG00000009607,ENSOMYG00000015144,ENSOMYG00000015326,ENSOMYG00000016154,ENSOMYG00000022421,ENSOMYG00000034594,ENSOMYG00000037440,ENSOMYG00000037483,ENSOMYG00000041903,ENSOMYG00000045611,ENSOMYG00000045682,ENSOMYG00000064330	FALSE	TRUE	44	791	13	0.0164349	0.295455
GO:0036379	GO:CC	1.3801e-06	myofilament	1669	GO:0030016, GO:0110165	ENSOMYG00000008671,ENSOMYG00000008691,ENSOMYG00000028916,ENSOMYG00000029399,ENSOMYG00000032181,ENSOMYG00000039291,ENSOMYG00000040669,ENSOMYG00000044636,ENSOMYG00000046868,ENSOMYG00000046883,ENSOMYG00000054158	FALSE	TRUE	33	791	11	0.0139064	0.333333
GO:0098687	GO:CC	2.14952e-06	chromosomal region	3186	GO:0005694, GO:0110165	ENSOMYG00000007398,ENSOMYG00000009450,ENSOMYG00000009607,ENSOMYG00000015144,ENSOMYG00000015326,ENSOMYG00000016154,ENSOMYG00000022421,ENSOMYG00000034594,ENSOMYG00000037440,ENSOMYG00000037483,ENSOMYG00000041903,ENSOMYG00000045611,ENSOMYG00000045682,ENSOMYG00000064330,ENSOMYG00000067789	FALSE	TRUE	69	791	15	0.0189633	0.217391
GO:0043292	GO:CC	2.19388e-06	contractile muscle fiber	1866	GO:0005737, GO:0043232, GO:0099512	ENSOMYG00000008207,ENSOMYG00000008671,ENSOMYG00000008691,ENSOMYG00000010157,ENSOMYG00000028916,ENSOMYG00000029399,ENSOMYG00000032181,ENSOMYG00000039291,ENSOMYG00000040669,ENSOMYG00000044636,ENSOMYG00000046868,ENSOMYG00000046883,ENSOMYG00000054158	FALSE	TRUE	52	791	13	0.0164349	0.25
GO:0030016	GO:CC	2.19388e-06	myofibril	842	GO:0043292	ENSOMYG00000008207,ENSOMYG00000008671,ENSOMYG00000008691,ENSOMYG00000010157,ENSOMYG00000028916,ENSOMYG00000029399,ENSOMYG00000032181,ENSOMYG00000039291,ENSOMYG00000040669,ENSOMYG00000044636,ENSOMYG00000046868,ENSOMYG00000046883,ENSOMYG00000054158	FALSE	TRUE	52	791	13	0.0164349	0.25
GO:0005861	GO:CC	2.33786e-06	troponin complex	390	GO:0005865, GO:0032991	ENSOMYG00000008671,ENSOMYG00000008691,ENSOMYG00000028916,ENSOMYG00000029399,ENSOMYG00000032181,ENSOMYG00000039291,ENSOMYG00000044636,ENSOMYG00000046868,ENSOMYG00000046883,ENSOMYG00000054158	FALSE	TRUE	29	791	10	0.0126422	0.344828
GO:0099512	GO:CC	2.33786e-06	supramolecular fiber	3306	GO:0099081	ENSOMYG00000007742,ENSOMYG00000008207,ENSOMYG00000008671,ENSOMYG00000008691,ENSOMYG00000010157,ENSOMYG00000015280,ENSOMYG00000017226,ENSOMYG00000018528,ENSOMYG00000019082,ENSOMYG00000021709,ENSOMYG00000021772,ENSOMYG00000023514,ENSOMYG00000023590,ENSOMYG00000028916,ENSOMYG00000029399,ENSOMYG00000031371,ENSOMYG00000032181,ENSOMYG00000036763,ENSOMYG00000038407,ENSOMYG00000039291,ENSOMYG00000040669,…	FALSE	TRUE	260	791	30	0.0379267	0.115385
GO:0099081	GO:CC	2.33786e-06	supramolecular polymer	3283	GO:0099080	ENSOMYG00000007742,ENSOMYG00000008207,ENSOMYG00000008671,ENSOMYG00000008691,ENSOMYG00000010157,ENSOMYG00000015280,ENSOMYG00000017226,ENSOMYG00000018528,ENSOMYG00000019082,ENSOMYG00000021709,ENSOMYG00000021772,ENSOMYG00000023514,ENSOMYG00000023590,ENSOMYG00000028916,ENSOMYG00000029399,ENSOMYG00000031371,ENSOMYG00000032181,ENSOMYG00000036763,ENSOMYG00000038407,ENSOMYG00000039291,ENSOMYG00000040669,…	FALSE	TRUE	260	791	30	0.0379267	0.115385
GO:0005865	GO:CC	2.5412e-06	striated muscle thin filament	393	GO:0015629, GO:0030017, GO:0036379	ENSOMYG00000008671,ENSOMYG00000008691,ENSOMYG00000028916,ENSOMYG00000029399,ENSOMYG00000032181,ENSOMYG00000039291,ENSOMYG00000044636,ENSOMYG00000046868,ENSOMYG00000046883,ENSOMYG00000054158	FALSE	TRUE	30	791	10	0.0126422	0.333333
GO:0071944	GO:CC	3.60121e-06	cell periphery	2735	GO:0110165	ENSOMYG00000002664,ENSOMYG00000003612,ENSOMYG00000003774,ENSOMYG00000003827,ENSOMYG00000004443,ENSOMYG00000005215,ENSOMYG00000005354,ENSOMYG00000005515,ENSOMYG00000005905,ENSOMYG00000007086,ENSOMYG00000008078,ENSOMYG00000008952,ENSOMYG00000009054,ENSOMYG00000009204,ENSOMYG00000009253,ENSOMYG00000009352,ENSOMYG00000009619,ENSOMYG00000010421,ENSOMYG00000012221,ENSOMYG00000013490,ENSOMYG00000013911,…	FALSE	TRUE	1484	791	97	0.12263	0.0653639
GO:0005886	GO:CC	5.20087e-06	plasma membrane	410	GO:0016020, GO:0071944	ENSOMYG00000002664,ENSOMYG00000003612,ENSOMYG00000003774,ENSOMYG00000003827,ENSOMYG00000004443,ENSOMYG00000005215,ENSOMYG00000005354,ENSOMYG00000005515,ENSOMYG00000005905,ENSOMYG00000007086,ENSOMYG00000008952,ENSOMYG00000009054,ENSOMYG00000009204,ENSOMYG00000009253,ENSOMYG00000009619,ENSOMYG00000010421,ENSOMYG00000013490,ENSOMYG00000013911,ENSOMYG00000014098,ENSOMYG00000014255,ENSOMYG00000014354,…	FALSE	TRUE	1379	791	91	0.115044	0.0659898
GO:0030017	GO:CC	5.20087e-06	sarcomere	843	GO:0030016, GO:0110165	ENSOMYG00000008207,ENSOMYG00000008671,ENSOMYG00000008691,ENSOMYG00000010157,ENSOMYG00000028916,ENSOMYG00000029399,ENSOMYG00000032181,ENSOMYG00000039291,ENSOMYG00000044636,ENSOMYG00000046868,ENSOMYG00000046883,ENSOMYG00000054158	FALSE	TRUE	49	791	12	0.0151707	0.244898
GO:0000776	GO:CC	1.13267e-05	kinetochore	84	GO:0000779, GO:0043232, GO:0099080	ENSOMYG00000009450,ENSOMYG00000009607,ENSOMYG00000015326,ENSOMYG00000016154,ENSOMYG00000022421,ENSOMYG00000037440,ENSOMYG00000037483,ENSOMYG00000045611,ENSOMYG00000064330	FALSE	TRUE	28	791	9	0.011378	0.321429
GO:0000779	GO:CC	1.13267e-05	condensed chromosome, centromeric region	85	GO:0000775, GO:0000793	ENSOMYG00000009450,ENSOMYG00000009607,ENSOMYG00000015326,ENSOMYG00000016154,ENSOMYG00000022421,ENSOMYG00000037440,ENSOMYG00000037483,ENSOMYG00000045611,ENSOMYG00000064330	FALSE	TRUE	28	791	9	0.011378	0.321429
GO:0005576	GO:CC	1.85788e-05	extracellular region	194	GO:0110165	ENSOMYG00000002596,ENSOMYG00000002634,ENSOMYG00000003248,ENSOMYG00000003616,ENSOMYG00000003648,ENSOMYG00000005081,ENSOMYG00000007493,ENSOMYG00000009171,ENSOMYG00000009309,ENSOMYG00000010130,ENSOMYG00000012483,ENSOMYG00000013391,ENSOMYG00000014098,ENSOMYG00000015062,ENSOMYG00000016024,ENSOMYG00000016183,ENSOMYG00000016417,ENSOMYG00000017291,ENSOMYG00000018649,ENSOMYG00000018726,ENSOMYG00000019175,…	TRUE	TRUE	1065	791	73	0.0922882	0.0685446
GO:0000793	GO:CC	2.0002e-05	condensed chromosome	93	GO:0005694	ENSOMYG00000009450,ENSOMYG00000009607,ENSOMYG00000015326,ENSOMYG00000016154,ENSOMYG00000018740,ENSOMYG00000022421,ENSOMYG00000037440,ENSOMYG00000037483,ENSOMYG00000042218,ENSOMYG00000045611,ENSOMYG00000064330	FALSE	TRUE	47	791	11	0.0139064	0.234043
GO:0005730	GO:CC	0.000773563	nucleolus	301	GO:0031981, GO:0043232	ENSOMYG00000003107,ENSOMYG00000004882,ENSOMYG00000007136,ENSOMYG00000009541,ENSOMYG00000010625,ENSOMYG00000011026,ENSOMYG00000012601,ENSOMYG00000012605,ENSOMYG00000012851,ENSOMYG00000017456,ENSOMYG00000018383,ENSOMYG00000019179,ENSOMYG00000020084,ENSOMYG00000026813,ENSOMYG00000030489,ENSOMYG00000031165,ENSOMYG00000037844,ENSOMYG00000037991,ENSOMYG00000043217,ENSOMYG00000045099,ENSOMYG00000046333,…	FALSE	TRUE	517	791	39	0.0493047	0.0754352
GO:0031981	GO:CC	0.000904071	nuclear lumen	1202	GO:0005634, GO:0070013	ENSOMYG00000001219,ENSOMYG00000003107,ENSOMYG00000003163,ENSOMYG00000004882,ENSOMYG00000007136,ENSOMYG00000007986,ENSOMYG00000009541,ENSOMYG00000010625,ENSOMYG00000011026,ENSOMYG00000012601,ENSOMYG00000012605,ENSOMYG00000012851,ENSOMYG00000013729,ENSOMYG00000016713,ENSOMYG00000017456,ENSOMYG00000018383,ENSOMYG00000018740,ENSOMYG00000019179,ENSOMYG00000020084,ENSOMYG00000026813,ENSOMYG00000030489,…	FALSE	TRUE	693	791	48	0.0606827	0.0692641
GO:0070013	GO:CC	0.000963645	intracellular organelle lumen	2344	GO:0043229, GO:0043233	ENSOMYG00000001219,ENSOMYG00000003107,ENSOMYG00000003163,ENSOMYG00000004882,ENSOMYG00000007136,ENSOMYG00000007986,ENSOMYG00000009541,ENSOMYG00000010625,ENSOMYG00000011026,ENSOMYG00000012601,ENSOMYG00000012605,ENSOMYG00000012851,ENSOMYG00000013729,ENSOMYG00000016713,ENSOMYG00000017456,ENSOMYG00000018383,ENSOMYG00000018660,ENSOMYG00000018740,ENSOMYG00000019179,ENSOMYG00000020084,ENSOMYG00000026813,…	FALSE	TRUE	797	791	53	0.0670038	0.0664994
GO:0043233	GO:CC	0.000963645	organelle lumen	1851	GO:0031974, GO:0043226	ENSOMYG00000001219,ENSOMYG00000003107,ENSOMYG00000003163,ENSOMYG00000004882,ENSOMYG00000007136,ENSOMYG00000007986,ENSOMYG00000009541,ENSOMYG00000010625,ENSOMYG00000011026,ENSOMYG00000012601,ENSOMYG00000012605,ENSOMYG00000012851,ENSOMYG00000013729,ENSOMYG00000016713,ENSOMYG00000017456,ENSOMYG00000018383,ENSOMYG00000018660,ENSOMYG00000018740,ENSOMYG00000019179,ENSOMYG00000020084,ENSOMYG00000026813,…	FALSE	TRUE	797	791	53	0.0670038	0.0664994
GO:0031974	GO:CC	0.000963645	membrane-enclosed lumen	1197	GO:0110165	ENSOMYG00000001219,ENSOMYG00000003107,ENSOMYG00000003163,ENSOMYG00000004882,ENSOMYG00000007136,ENSOMYG00000007986,ENSOMYG00000009541,ENSOMYG00000010625,ENSOMYG00000011026,ENSOMYG00000012601,ENSOMYG00000012605,ENSOMYG00000012851,ENSOMYG00000013729,ENSOMYG00000016713,ENSOMYG00000017456,ENSOMYG00000018383,ENSOMYG00000018660,ENSOMYG00000018740,ENSOMYG00000019179,ENSOMYG00000020084,ENSOMYG00000026813,…	FALSE	TRUE	797	791	53	0.0670038	0.0664994
GO:0034702	GO:CC	0.00171902	monoatomic ion channel complex	1509	GO:1902495	ENSOMYG00000003774,ENSOMYG00000003827,ENSOMYG00000005354,ENSOMYG00000008952,ENSOMYG00000010421,ENSOMYG00000014354,ENSOMYG00000015167,ENSOMYG00000021621,ENSOMYG00000026668,ENSOMYG00000029610,ENSOMYG00000035130,ENSOMYG00000043795,ENSOMYG00000045035,ENSOMYG00000052151,ENSOMYG00000053628,ENSOMYG00000060570,ENSOMYG00000062919,ENSOMYG00000069341,ENSOMYG00000070436,ENSOMYG00000076670	TRUE	TRUE	206	791	20	0.0252845	0.0970874
GO:0000228	GO:CC	0.00201801	nuclear chromosome	37	GO:0005694, GO:0031981	ENSOMYG00000001219,ENSOMYG00000003163,ENSOMYG00000007986,ENSOMYG00000013729,ENSOMYG00000016713,ENSOMYG00000018740,ENSOMYG00000041586,ENSOMYG00000042218	FALSE	TRUE	42	791	8	0.0101138	0.190476
GO:0005856	GO:CC	0.00219443	cytoskeleton	387	GO:0043232	ENSOMYG00000001429,ENSOMYG00000005576,ENSOMYG00000006658,ENSOMYG00000006804,ENSOMYG00000007742,ENSOMYG00000008671,ENSOMYG00000008691,ENSOMYG00000015280,ENSOMYG00000016715,ENSOMYG00000017226,ENSOMYG00000018528,ENSOMYG00000019082,ENSOMYG00000019760,ENSOMYG00000021709,ENSOMYG00000021772,ENSOMYG00000023069,ENSOMYG00000023201,ENSOMYG00000023514,ENSOMYG00000023590,ENSOMYG00000027669,ENSOMYG00000028916,…	FALSE	TRUE	787	791	51	0.0644753	0.064803
GO:0005819	GO:CC	0.0022256	spindle	359	GO:0015630, GO:0043232	ENSOMYG00000015280,ENSOMYG00000017226,ENSOMYG00000019082,ENSOMYG00000019760,ENSOMYG00000036763,ENSOMYG00000041944,ENSOMYG00000045084,ENSOMYG00000046754	TRUE	TRUE	43	791	8	0.0101138	0.186047
GO:0015629	GO:CC	0.00533786	actin cytoskeleton	687	GO:0005856	ENSOMYG00000001429,ENSOMYG00000005576,ENSOMYG00000006658,ENSOMYG00000008671,ENSOMYG00000008691,ENSOMYG00000016715,ENSOMYG00000028916,ENSOMYG00000029399,ENSOMYG00000032181,ENSOMYG00000039291,ENSOMYG00000044636,ENSOMYG00000046853,ENSOMYG00000046868,ENSOMYG00000046883,ENSOMYG00000050047,ENSOMYG00000053143,ENSOMYG00000054158,ENSOMYG00000061824,ENSOMYG00000069142,ENSOMYG00000071995	FALSE	TRUE	227	791	20	0.0252845	0.0881057
GO:0098797	GO:CC	0.00663963	plasma membrane protein complex	3200	GO:0005886, GO:0098796	ENSOMYG00000002664,ENSOMYG00000003612,ENSOMYG00000003774,ENSOMYG00000003827,ENSOMYG00000005354,ENSOMYG00000005905,ENSOMYG00000008952,ENSOMYG00000009054,ENSOMYG00000010421,ENSOMYG00000014255,ENSOMYG00000014354,ENSOMYG00000015167,ENSOMYG00000015500,ENSOMYG00000015899,ENSOMYG00000018326,ENSOMYG00000026668,ENSOMYG00000027025,ENSOMYG00000029052,ENSOMYG00000029610,ENSOMYG00000031738,ENSOMYG00000035130,…	FALSE	TRUE	412	791	30	0.0379267	0.0728155
GO:0034703	GO:CC	0.00853742	cation channel complex	1510	GO:0034702	ENSOMYG00000003774,ENSOMYG00000003827,ENSOMYG00000005354,ENSOMYG00000008952,ENSOMYG00000010421,ENSOMYG00000014354,ENSOMYG00000026668,ENSOMYG00000029610,ENSOMYG00000035130,ENSOMYG00000043795,ENSOMYG00000045035,ENSOMYG00000052151,ENSOMYG00000053628,ENSOMYG00000060570,ENSOMYG00000062919,ENSOMYG00000070436,ENSOMYG00000076670	FALSE	TRUE	186	791	17	0.0214918	0.0913978
GO:0005694	GO:CC	0.0109598	chromosome	280	GO:0043232	ENSOMYG00000001219,ENSOMYG00000002443,ENSOMYG00000003163,ENSOMYG00000005233,ENSOMYG00000006152,ENSOMYG00000007398,ENSOMYG00000007986,ENSOMYG00000009450,ENSOMYG00000009607,ENSOMYG00000010384,ENSOMYG00000013729,ENSOMYG00000014515,ENSOMYG00000015144,ENSOMYG00000015326,ENSOMYG00000015999,ENSOMYG00000016154,ENSOMYG00000016713,ENSOMYG00000018740,ENSOMYG00000022421,ENSOMYG00000023159,ENSOMYG00000034594,…	FALSE	TRUE	485	791	33	0.0417193	0.0680412
GO:0000811	GO:CC	0.0135278	GINS complex	107	GO:0000228, GO:0031261	ENSOMYG00000001219,ENSOMYG00000007986	TRUE	TRUE	2	791	2	0.00252845	1
GO:0031261	GO:CC	0.0135278	DNA replication preinitiation complex	1059	GO:0005654, GO:0032993, GO:0140513	ENSOMYG00000001219,ENSOMYG00000007986	FALSE	TRUE	2	791	2	0.00252845	1
GO:1990351	GO:CC	0.0202569	transporter complex	3848	GO:0032991	ENSOMYG00000003774,ENSOMYG00000003827,ENSOMYG00000005354,ENSOMYG00000008952,ENSOMYG00000010421,ENSOMYG00000014354,ENSOMYG00000015167,ENSOMYG00000021621,ENSOMYG00000026668,ENSOMYG00000026727,ENSOMYG00000029610,ENSOMYG00000035130,ENSOMYG00000043795,ENSOMYG00000045035,ENSOMYG00000052151,ENSOMYG00000053628,ENSOMYG00000060570,ENSOMYG00000062919,ENSOMYG00000069341,ENSOMYG00000070436,ENSOMYG00000076670	FALSE	TRUE	276	791	21	0.0265487	0.076087
GO:1902495	GO:CC	0.0202569	transmembrane transporter complex	3602	GO:0098796, GO:1990351	ENSOMYG00000003774,ENSOMYG00000003827,ENSOMYG00000005354,ENSOMYG00000008952,ENSOMYG00000010421,ENSOMYG00000014354,ENSOMYG00000015167,ENSOMYG00000021621,ENSOMYG00000026668,ENSOMYG00000026727,ENSOMYG00000029610,ENSOMYG00000035130,ENSOMYG00000043795,ENSOMYG00000045035,ENSOMYG00000052151,ENSOMYG00000053628,ENSOMYG00000060570,ENSOMYG00000062919,ENSOMYG00000069341,ENSOMYG00000070436,ENSOMYG00000076670	FALSE	TRUE	276	791	21	0.0265487	0.076087
GO:0099513	GO:CC	0.020518	polymeric cytoskeletal fiber	3307	GO:0005856, GO:0099512	ENSOMYG00000007742,ENSOMYG00000015280,ENSOMYG00000017226,ENSOMYG00000018528,ENSOMYG00000019082,ENSOMYG00000021709,ENSOMYG00000021772,ENSOMYG00000023514,ENSOMYG00000023590,ENSOMYG00000031371,ENSOMYG00000036763,ENSOMYG00000038407,ENSOMYG00000041799,ENSOMYG00000050271,ENSOMYG00000053991,ENSOMYG00000056027,ENSOMYG00000061824	FALSE	TRUE	205	791	17	0.0214918	0.0829268
GO:0042613	GO:CC	0.0218634	MHC class II protein complex	1779	GO:0042611	ENSOMYG00000002664,ENSOMYG00000005905,ENSOMYG00000015899	FALSE	TRUE	8	791	3	0.00379267	0.375
GO:0005788	GO:CC	0.0218634	endoplasmic reticulum lumen	341	GO:0005783, GO:0070013	ENSOMYG00000018660,ENSOMYG00000028806,ENSOMYG00000029430,ENSOMYG00000041283	FALSE	TRUE	16	791	4	0.00505689	0.25
GO:0005634	GO:CC	0.0290733	nucleus	239	GO:0043231	ENSOMYG00000000138,ENSOMYG00000000994,ENSOMYG00000001219,ENSOMYG00000001753,ENSOMYG00000001763,ENSOMYG00000002443,ENSOMYG00000002752,ENSOMYG00000003107,ENSOMYG00000003163,ENSOMYG00000003836,ENSOMYG00000003989,ENSOMYG00000004180,ENSOMYG00000004292,ENSOMYG00000004457,ENSOMYG00000004882,ENSOMYG00000005445,ENSOMYG00000006234,ENSOMYG00000007057,ENSOMYG00000007136,ENSOMYG00000007200,ENSOMYG00000007398,…	FALSE	TRUE	3571	791	166	0.209861	0.0464856
GO:0005874	GO:CC	0.0293223	microtubule	400	GO:0015630, GO:0099513	ENSOMYG00000007742,ENSOMYG00000015280,ENSOMYG00000017226,ENSOMYG00000019082,ENSOMYG00000021709,ENSOMYG00000021772,ENSOMYG00000023514,ENSOMYG00000023590,ENSOMYG00000031371,ENSOMYG00000036763,ENSOMYG00000041799	FALSE	TRUE	112	791	11	0.0139064	0.0982143
GO:0008622	GO:CC	0.0320153	epsilon DNA polymerase complex	497	GO:0000228, GO:0042575, GO:0140513	ENSOMYG00000013729,ENSOMYG00000016713	FALSE	TRUE	3	791	2	0.00252845	0.666667
GO:0042611	GO:CC	0.0401165	MHC protein complex	1777	GO:0098797	ENSOMYG00000002664,ENSOMYG00000005905,ENSOMYG00000015899	FALSE	TRUE	10	791	3	0.00379267	0.3
GO:0097014	GO:CC	0.0480175	ciliary plasm	2834	GO:0005929, GO:0032838	ENSOMYG00000006804,ENSOMYG00000041799,ENSOMYG00000044084	FALSE	TRUE	11	791	3	0.00379267	0.272727
GO:0032838	GO:CC	0.0480175	plasma membrane bounded cell projection cytoplasm	1306	GO:0099568, GO:0120025	ENSOMYG00000006804,ENSOMYG00000041799,ENSOMYG00000044084	FALSE	TRUE	11	791	3	0.00379267	0.272727
GO:0005930	GO:CC	0.0480175	axoneme	442	GO:0005856, GO:0097014, GO:0110165	ENSOMYG00000006804,ENSOMYG00000041799,ENSOMYG00000044084	FALSE	TRUE	11	791	3	0.00379267	0.272727
GO:0015030	GO:CC	0.0480175	Cajal body	684	GO:0016604	ENSOMYG00000004882,ENSOMYG00000060963,ENSOMYG00000062760	TRUE	TRUE	11	791	3	0.00379267	0.272727
GO:0099568	GO:CC	0.0480175	cytoplasmic region	3313	GO:0005737	ENSOMYG00000006804,ENSOMYG00000041799,ENSOMYG00000044084	FALSE	TRUE	11	791	3	0.00379267	0.272727
GO:0005488	GO:MF	2.55681e-13	binding	1460	GO:0003674	ENSOMYG00000000183,ENSOMYG00000000321,ENSOMYG00000000432,ENSOMYG00000000447,ENSOMYG00000000542,ENSOMYG00000000567,ENSOMYG00000000646,ENSOMYG00000000651,ENSOMYG00000000729,ENSOMYG00000000791,ENSOMYG00000000815,ENSOMYG00000000868,ENSOMYG00000000878,ENSOMYG00000000886,ENSOMYG00000000907,ENSOMYG00000000995,ENSOMYG00000001142,ENSOMYG00000001248,ENSOMYG00000001253,ENSOMYG00000001289,ENSOMYG00000001352,…	TRUE	TRUE	22150	1629	1151	0.706568	0.0519639
GO:0003677	GO:MF	2.90573e-07	DNA binding	322	GO:0003676	ENSOMYG00000000183,ENSOMYG00000000651,ENSOMYG00000000886,ENSOMYG00000001248,ENSOMYG00000001753,ENSOMYG00000001763,ENSOMYG00000001986,ENSOMYG00000003163,ENSOMYG00000004292,ENSOMYG00000004365,ENSOMYG00000004686,ENSOMYG00000004943,ENSOMYG00000005629,ENSOMYG00000005712,ENSOMYG00000007057,ENSOMYG00000007398,ENSOMYG00000008919,ENSOMYG00000009318,ENSOMYG00000009607,ENSOMYG00000010296,ENSOMYG00000010414,…	TRUE	TRUE	4498	1629	285	0.174954	0.0633615
GO:0097159	GO:MF	2.90573e-07	organic cyclic compound binding	8463	GO:0005488	ENSOMYG00000000183,ENSOMYG00000000432,ENSOMYG00000000447,ENSOMYG00000000542,ENSOMYG00000000646,ENSOMYG00000000651,ENSOMYG00000000868,ENSOMYG00000000878,ENSOMYG00000000886,ENSOMYG00000000907,ENSOMYG00000000995,ENSOMYG00000001248,ENSOMYG00000001253,ENSOMYG00000001289,ENSOMYG00000001429,ENSOMYG00000001466,ENSOMYG00000001534,ENSOMYG00000001753,ENSOMYG00000001763,ENSOMYG00000001782,ENSOMYG00000001986,…	FALSE	TRUE	11581	1629	634	0.389196	0.0547448
GO:0043168	GO:MF	1.2375e-06	anion binding	5249	GO:0043167	ENSOMYG00000000432,ENSOMYG00000000646,ENSOMYG00000000868,ENSOMYG00000000878,ENSOMYG00000000907,ENSOMYG00000001253,ENSOMYG00000001289,ENSOMYG00000001429,ENSOMYG00000001466,ENSOMYG00000001753,ENSOMYG00000002002,ENSOMYG00000002397,ENSOMYG00000002443,ENSOMYG00000002828,ENSOMYG00000003003,ENSOMYG00000003063,ENSOMYG00000003084,ENSOMYG00000003140,ENSOMYG00000003321,ENSOMYG00000003603,ENSOMYG00000004125,…	FALSE	TRUE	3554	1629	231	0.141805	0.0649972
GO:1901363	GO:MF	3.93084e-06	heterocyclic compound binding	9868	GO:0036094	ENSOMYG00000000432,ENSOMYG00000000646,ENSOMYG00000000868,ENSOMYG00000000878,ENSOMYG00000000907,ENSOMYG00000001253,ENSOMYG00000001289,ENSOMYG00000001429,ENSOMYG00000001466,ENSOMYG00000001753,ENSOMYG00000001782,ENSOMYG00000002002,ENSOMYG00000002397,ENSOMYG00000002443,ENSOMYG00000002828,ENSOMYG00000003003,ENSOMYG00000003063,ENSOMYG00000003084,ENSOMYG00000003140,ENSOMYG00000003321,ENSOMYG00000003603,…	FALSE	TRUE	3670	1629	234	0.143646	0.0637602
GO:0022857	GO:MF	7.00454e-06	transmembrane transporter activity	3568	GO:0005215	ENSOMYG00000000807,ENSOMYG00000001367,ENSOMYG00000002665,ENSOMYG00000003774,ENSOMYG00000004443,ENSOMYG00000005215,ENSOMYG00000005344,ENSOMYG00000005354,ENSOMYG00000005515,ENSOMYG00000005625,ENSOMYG00000005667,ENSOMYG00000006019,ENSOMYG00000006320,ENSOMYG00000007086,ENSOMYG00000007510,ENSOMYG00000008139,ENSOMYG00000008646,ENSOMYG00000008952,ENSOMYG00000009464,ENSOMYG00000009933,ENSOMYG00000010100,…	TRUE	TRUE	1719	1629	126	0.0773481	0.0732984
GO:0005215	GO:MF	1.11699e-05	transporter activity	1335	GO:0003674	ENSOMYG00000000807,ENSOMYG00000001367,ENSOMYG00000002665,ENSOMYG00000002818,ENSOMYG00000003084,ENSOMYG00000003774,ENSOMYG00000004443,ENSOMYG00000005215,ENSOMYG00000005344,ENSOMYG00000005354,ENSOMYG00000005515,ENSOMYG00000005625,ENSOMYG00000005667,ENSOMYG00000006019,ENSOMYG00000006320,ENSOMYG00000007086,ENSOMYG00000007510,ENSOMYG00000008139,ENSOMYG00000008646,ENSOMYG00000008952,ENSOMYG00000009464,…	FALSE	TRUE	1809	1629	130	0.0798036	0.0718629
GO:0044183	GO:MF	1.77073e-05	protein folding chaperone	5497	GO:0003674	ENSOMYG00000004125,ENSOMYG00000004291,ENSOMYG00000010447,ENSOMYG00000027697,ENSOMYG00000029430,ENSOMYG00000034757,ENSOMYG00000043512,ENSOMYG00000045812,ENSOMYG00000058146,ENSOMYG00000063171,ENSOMYG00000066882,ENSOMYG00000067311,ENSOMYG00000068871,ENSOMYG00000069516,ENSOMYG00000071516,ENSOMYG00000072249	TRUE	TRUE	75	1629	16	0.00982198	0.213333
GO:0140657	GO:MF	1.9378e-05	ATP-dependent activity	9465	GO:0003674	ENSOMYG00000001753,ENSOMYG00000003084,ENSOMYG00000003321,ENSOMYG00000004125,ENSOMYG00000005852,ENSOMYG00000007756,ENSOMYG00000008139,ENSOMYG00000009750,ENSOMYG00000010011,ENSOMYG00000010447,ENSOMYG00000011026,ENSOMYG00000012149,ENSOMYG00000012427,ENSOMYG00000013424,ENSOMYG00000014521,ENSOMYG00000015974,ENSOMYG00000015976,ENSOMYG00000017817,ENSOMYG00000019353,ENSOMYG00000019750,ENSOMYG00000021412,…	FALSE	TRUE	831	1629	71	0.043585	0.0854392
GO:0036094	GO:MF	1.95339e-05	small molecule binding	4932	GO:0005488	ENSOMYG00000000432,ENSOMYG00000000542,ENSOMYG00000000567,ENSOMYG00000000646,ENSOMYG00000000868,ENSOMYG00000000878,ENSOMYG00000000907,ENSOMYG00000000995,ENSOMYG00000001253,ENSOMYG00000001289,ENSOMYG00000001429,ENSOMYG00000001466,ENSOMYG00000001753,ENSOMYG00000001763,ENSOMYG00000001782,ENSOMYG00000002002,ENSOMYG00000002397,ENSOMYG00000002443,ENSOMYG00000002828,ENSOMYG00000003003,ENSOMYG00000003063,…	FALSE	TRUE	7538	1629	422	0.259055	0.055983
GO:0005524	GO:MF	1.95339e-05	ATP binding	1480	GO:0032559, GO:0035639	ENSOMYG00000000868,ENSOMYG00000000907,ENSOMYG00000001253,ENSOMYG00000001429,ENSOMYG00000001466,ENSOMYG00000001753,ENSOMYG00000002002,ENSOMYG00000002397,ENSOMYG00000002443,ENSOMYG00000003063,ENSOMYG00000003084,ENSOMYG00000003140,ENSOMYG00000003321,ENSOMYG00000004125,ENSOMYG00000004365,ENSOMYG00000004468,ENSOMYG00000004835,ENSOMYG00000005515,ENSOMYG00000005852,ENSOMYG00000006280,ENSOMYG00000006658,…	FALSE	TRUE	2356	1629	158	0.096992	0.0670628
GO:1901265	GO:MF	1.95339e-05	nucleoside phosphate binding	9865	GO:0097159	ENSOMYG00000000432,ENSOMYG00000000646,ENSOMYG00000000868,ENSOMYG00000000878,ENSOMYG00000000907,ENSOMYG00000001253,ENSOMYG00000001429,ENSOMYG00000001466,ENSOMYG00000001753,ENSOMYG00000001782,ENSOMYG00000002002,ENSOMYG00000002397,ENSOMYG00000002443,ENSOMYG00000002828,ENSOMYG00000003003,ENSOMYG00000003063,ENSOMYG00000003084,ENSOMYG00000003140,ENSOMYG00000003321,ENSOMYG00000004125,ENSOMYG00000004208,…	FALSE	TRUE	3520	1629	220	0.135052	0.0625
GO:0032559	GO:MF	1.95339e-05	adenyl ribonucleotide binding	4226	GO:0030554, GO:0032555	ENSOMYG00000000868,ENSOMYG00000000907,ENSOMYG00000001253,ENSOMYG00000001429,ENSOMYG00000001466,ENSOMYG00000001753,ENSOMYG00000002002,ENSOMYG00000002397,ENSOMYG00000002443,ENSOMYG00000003063,ENSOMYG00000003084,ENSOMYG00000003140,ENSOMYG00000003321,ENSOMYG00000004125,ENSOMYG00000004365,ENSOMYG00000004468,ENSOMYG00000004835,ENSOMYG00000005515,ENSOMYG00000005852,ENSOMYG00000006280,ENSOMYG00000006658,…	FALSE	TRUE	2365	1629	159	0.0976059	0.0672304
GO:0000166	GO:MF	1.95861e-05	nucleotide binding	31	GO:1901265, GO:1901363	ENSOMYG00000000432,ENSOMYG00000000646,ENSOMYG00000000868,ENSOMYG00000000878,ENSOMYG00000000907,ENSOMYG00000001253,ENSOMYG00000001429,ENSOMYG00000001466,ENSOMYG00000001753,ENSOMYG00000001782,ENSOMYG00000002002,ENSOMYG00000002397,ENSOMYG00000002443,ENSOMYG00000002828,ENSOMYG00000003003,ENSOMYG00000003063,ENSOMYG00000003084,ENSOMYG00000003140,ENSOMYG00000003321,ENSOMYG00000004125,ENSOMYG00000004208,…	FALSE	TRUE	3505	1629	219	0.134438	0.0624822
GO:0015267	GO:MF	2.45274e-05	channel activity	2408	GO:0022803	ENSOMYG00000000807,ENSOMYG00000001367,ENSOMYG00000002665,ENSOMYG00000003774,ENSOMYG00000004443,ENSOMYG00000005354,ENSOMYG00000005515,ENSOMYG00000007086,ENSOMYG00000007510,ENSOMYG00000008952,ENSOMYG00000009464,ENSOMYG00000010100,ENSOMYG00000010421,ENSOMYG00000011317,ENSOMYG00000011505,ENSOMYG00000012991,ENSOMYG00000013490,ENSOMYG00000014354,ENSOMYG00000015167,ENSOMYG00000016667,ENSOMYG00000017847,…	FALSE	TRUE	817	1629	69	0.0423573	0.0844553
GO:0022803	GO:MF	2.45274e-05	passive transmembrane transporter activity	3541	GO:0022857	ENSOMYG00000000807,ENSOMYG00000001367,ENSOMYG00000002665,ENSOMYG00000003774,ENSOMYG00000004443,ENSOMYG00000005354,ENSOMYG00000005515,ENSOMYG00000007086,ENSOMYG00000007510,ENSOMYG00000008952,ENSOMYG00000009464,ENSOMYG00000010100,ENSOMYG00000010421,ENSOMYG00000011317,ENSOMYG00000011505,ENSOMYG00000012991,ENSOMYG00000013490,ENSOMYG00000014354,ENSOMYG00000015167,ENSOMYG00000016667,ENSOMYG00000017847,…	FALSE	TRUE	817	1629	69	0.0423573	0.0844553
GO:0030554	GO:MF	2.45568e-05	adenyl nucleotide binding	3721	GO:0017076	ENSOMYG00000000868,ENSOMYG00000000907,ENSOMYG00000001253,ENSOMYG00000001429,ENSOMYG00000001466,ENSOMYG00000001753,ENSOMYG00000001782,ENSOMYG00000002002,ENSOMYG00000002397,ENSOMYG00000002443,ENSOMYG00000003063,ENSOMYG00000003084,ENSOMYG00000003140,ENSOMYG00000003321,ENSOMYG00000004125,ENSOMYG00000004365,ENSOMYG00000004468,ENSOMYG00000004835,ENSOMYG00000005515,ENSOMYG00000005852,ENSOMYG00000006280,…	FALSE	TRUE	2468	1629	163	0.100061	0.0660454
GO:0097367	GO:MF	2.53118e-05	carbohydrate derivative binding	8493	GO:0005488	ENSOMYG00000000646,ENSOMYG00000000868,ENSOMYG00000000878,ENSOMYG00000000907,ENSOMYG00000001253,ENSOMYG00000001429,ENSOMYG00000001466,ENSOMYG00000001753,ENSOMYG00000002002,ENSOMYG00000002397,ENSOMYG00000002443,ENSOMYG00000003003,ENSOMYG00000003063,ENSOMYG00000003084,ENSOMYG00000003140,ENSOMYG00000003321,ENSOMYG00000004125,ENSOMYG00000004208,ENSOMYG00000004365,ENSOMYG00000004468,ENSOMYG00000004835,…	FALSE	TRUE	3357	1629	210	0.128913	0.0625559
GO:0032555	GO:MF	3.171e-05	purine ribonucleotide binding	4222	GO:0017076, GO:0032553	ENSOMYG00000000646,ENSOMYG00000000868,ENSOMYG00000000878,ENSOMYG00000000907,ENSOMYG00000001253,ENSOMYG00000001429,ENSOMYG00000001466,ENSOMYG00000001753,ENSOMYG00000002002,ENSOMYG00000002397,ENSOMYG00000002443,ENSOMYG00000003003,ENSOMYG00000003063,ENSOMYG00000003084,ENSOMYG00000003140,ENSOMYG00000003321,ENSOMYG00000004125,ENSOMYG00000004208,ENSOMYG00000004365,ENSOMYG00000004468,ENSOMYG00000004835,…	FALSE	TRUE	3239	1629	203	0.124616	0.0626737
GO:0043167	GO:MF	3.171e-05	ion binding	5248	GO:0036094	ENSOMYG00000000432,ENSOMYG00000000542,ENSOMYG00000000567,ENSOMYG00000000646,ENSOMYG00000000868,ENSOMYG00000000878,ENSOMYG00000000907,ENSOMYG00000000995,ENSOMYG00000001253,ENSOMYG00000001289,ENSOMYG00000001429,ENSOMYG00000001466,ENSOMYG00000001753,ENSOMYG00000001763,ENSOMYG00000002002,ENSOMYG00000002397,ENSOMYG00000002443,ENSOMYG00000002828,ENSOMYG00000003003,ENSOMYG00000003063,ENSOMYG00000003084,…	FALSE	TRUE	7314	1629	408	0.25046	0.0557834
GO:0035639	GO:MF	3.29189e-05	purine ribonucleoside triphosphate binding	4888	GO:0043168, GO:1901265, GO:1901363	ENSOMYG00000000646,ENSOMYG00000000868,ENSOMYG00000000878,ENSOMYG00000000907,ENSOMYG00000001253,ENSOMYG00000001429,ENSOMYG00000001466,ENSOMYG00000001753,ENSOMYG00000002002,ENSOMYG00000002397,ENSOMYG00000002443,ENSOMYG00000003003,ENSOMYG00000003063,ENSOMYG00000003084,ENSOMYG00000003140,ENSOMYG00000003321,ENSOMYG00000004125,ENSOMYG00000004208,ENSOMYG00000004365,ENSOMYG00000004468,ENSOMYG00000004835,…	FALSE	TRUE	3224	1629	202	0.124002	0.0626551
GO:0032553	GO:MF	4.28967e-05	ribonucleotide binding	4220	GO:0000166, GO:0097367	ENSOMYG00000000646,ENSOMYG00000000868,ENSOMYG00000000878,ENSOMYG00000000907,ENSOMYG00000001253,ENSOMYG00000001429,ENSOMYG00000001466,ENSOMYG00000001753,ENSOMYG00000002002,ENSOMYG00000002397,ENSOMYG00000002443,ENSOMYG00000003003,ENSOMYG00000003063,ENSOMYG00000003084,ENSOMYG00000003140,ENSOMYG00000003321,ENSOMYG00000004125,ENSOMYG00000004208,ENSOMYG00000004365,ENSOMYG00000004468,ENSOMYG00000004835,…	FALSE	TRUE	3258	1629	203	0.124616	0.0623082
GO:0017076	GO:MF	4.94512e-05	purine nucleotide binding	3083	GO:0000166	ENSOMYG00000000646,ENSOMYG00000000868,ENSOMYG00000000878,ENSOMYG00000000907,ENSOMYG00000001253,ENSOMYG00000001429,ENSOMYG00000001466,ENSOMYG00000001753,ENSOMYG00000001782,ENSOMYG00000002002,ENSOMYG00000002397,ENSOMYG00000002443,ENSOMYG00000003003,ENSOMYG00000003063,ENSOMYG00000003084,ENSOMYG00000003140,ENSOMYG00000003321,ENSOMYG00000004125,ENSOMYG00000004208,ENSOMYG00000004365,ENSOMYG00000004468,…	FALSE	TRUE	3363	1629	208	0.127686	0.0618495
GO:0140662	GO:MF	6.46978e-05	ATP-dependent protein folding chaperone	9470	GO:0044183, GO:0140657	ENSOMYG00000004125,ENSOMYG00000010447,ENSOMYG00000027697,ENSOMYG00000029430,ENSOMYG00000034757,ENSOMYG00000043512,ENSOMYG00000045812,ENSOMYG00000058146,ENSOMYG00000063171,ENSOMYG00000066882,ENSOMYG00000067311,ENSOMYG00000069516,ENSOMYG00000071516,ENSOMYG00000072249	FALSE	TRUE	69	1629	14	0.00859423	0.202899
GO:0046873	GO:MF	0.000640234	metal ion transmembrane transporter activity	5731	GO:0008324, GO:0022890	ENSOMYG00000002665,ENSOMYG00000003774,ENSOMYG00000005354,ENSOMYG00000008139,ENSOMYG00000008952,ENSOMYG00000010100,ENSOMYG00000010421,ENSOMYG00000012991,ENSOMYG00000013424,ENSOMYG00000014354,ENSOMYG00000017847,ENSOMYG00000018924,ENSOMYG00000019093,ENSOMYG00000019684,ENSOMYG00000019964,ENSOMYG00000020212,ENSOMYG00000020219,ENSOMYG00000021414,ENSOMYG00000024619,ENSOMYG00000025609,ENSOMYG00000026668,…	FALSE	TRUE	547	1629	47	0.0288521	0.0859232
GO:0015075	GO:MF	0.00157905	monoatomic ion transmembrane transporter activity	2262	GO:0022857	ENSOMYG00000000807,ENSOMYG00000001367,ENSOMYG00000002665,ENSOMYG00000003774,ENSOMYG00000005354,ENSOMYG00000005515,ENSOMYG00000006019,ENSOMYG00000007086,ENSOMYG00000007510,ENSOMYG00000008139,ENSOMYG00000008952,ENSOMYG00000009464,ENSOMYG00000010100,ENSOMYG00000010421,ENSOMYG00000011317,ENSOMYG00000011505,ENSOMYG00000012991,ENSOMYG00000013424,ENSOMYG00000013490,ENSOMYG00000014354,ENSOMYG00000015167,…	FALSE	TRUE	1044	1629	75	0.0460405	0.0718391
GO:0022890	GO:MF	0.00197486	inorganic cation transmembrane transporter activity	3588	GO:0015318	ENSOMYG00000002665,ENSOMYG00000003774,ENSOMYG00000004443,ENSOMYG00000005354,ENSOMYG00000008139,ENSOMYG00000008952,ENSOMYG00000010100,ENSOMYG00000010421,ENSOMYG00000012991,ENSOMYG00000013424,ENSOMYG00000014354,ENSOMYG00000017847,ENSOMYG00000018924,ENSOMYG00000019093,ENSOMYG00000019684,ENSOMYG00000019964,ENSOMYG00000020212,ENSOMYG00000020219,ENSOMYG00000021414,ENSOMYG00000021891,ENSOMYG00000024619,…	FALSE	TRUE	657	1629	52	0.0319214	0.0791476
GO:0003941	GO:MF	0.00244744	L-serine ammonia-lyase activity	453	GO:0016841	ENSOMYG00000001289,ENSOMYG00000011163,ENSOMYG00000038875	TRUE	TRUE	3	1629	3	0.00184162	1
GO:0008324	GO:MF	0.00244744	monoatomic cation transmembrane transporter activity	1637	GO:0015075	ENSOMYG00000002665,ENSOMYG00000003774,ENSOMYG00000005354,ENSOMYG00000005515,ENSOMYG00000006019,ENSOMYG00000008139,ENSOMYG00000008952,ENSOMYG00000010100,ENSOMYG00000010421,ENSOMYG00000012991,ENSOMYG00000013424,ENSOMYG00000013490,ENSOMYG00000014354,ENSOMYG00000015167,ENSOMYG00000017847,ENSOMYG00000018814,ENSOMYG00000018924,ENSOMYG00000019093,ENSOMYG00000019684,ENSOMYG00000019964,ENSOMYG00000020212,…	FALSE	TRUE	766	1629	58	0.0356047	0.075718
GO:0005216	GO:MF	0.00313373	monoatomic ion channel activity	1336	GO:0015075, GO:0015267	ENSOMYG00000000807,ENSOMYG00000001367,ENSOMYG00000002665,ENSOMYG00000003774,ENSOMYG00000005354,ENSOMYG00000005515,ENSOMYG00000007086,ENSOMYG00000007510,ENSOMYG00000008952,ENSOMYG00000009464,ENSOMYG00000010100,ENSOMYG00000010421,ENSOMYG00000011317,ENSOMYG00000011505,ENSOMYG00000012991,ENSOMYG00000013490,ENSOMYG00000014354,ENSOMYG00000015167,ENSOMYG00000016667,ENSOMYG00000017847,ENSOMYG00000018814,…	FALSE	TRUE	757	1629	57	0.0349908	0.0752972
GO:0005261	GO:MF	0.0043605	monoatomic cation channel activity	1365	GO:0005216, GO:0008324	ENSOMYG00000002665,ENSOMYG00000003774,ENSOMYG00000005354,ENSOMYG00000005515,ENSOMYG00000008952,ENSOMYG00000010100,ENSOMYG00000010421,ENSOMYG00000012991,ENSOMYG00000013490,ENSOMYG00000014354,ENSOMYG00000015167,ENSOMYG00000017847,ENSOMYG00000018814,ENSOMYG00000018924,ENSOMYG00000019093,ENSOMYG00000019684,ENSOMYG00000020212,ENSOMYG00000020219,ENSOMYG00000026356,ENSOMYG00000026668,ENSOMYG00000028578,…	FALSE	TRUE	515	1629	42	0.0257827	0.0815534
GO:0003824	GO:MF	0.00456238	catalytic activity	365	GO:0003674	ENSOMYG00000000237,ENSOMYG00000000567,ENSOMYG00000000646,ENSOMYG00000000669,ENSOMYG00000000868,ENSOMYG00000000872,ENSOMYG00000000878,ENSOMYG00000000907,ENSOMYG00000000940,ENSOMYG00000000981,ENSOMYG00000000995,ENSOMYG00000001173,ENSOMYG00000001253,ENSOMYG00000001289,ENSOMYG00000001466,ENSOMYG00000001507,ENSOMYG00000001673,ENSOMYG00000001753,ENSOMYG00000001782,ENSOMYG00000001999,ENSOMYG00000002002,…	FALSE	TRUE	9266	1629	480	0.294659	0.0518023
GO:0038023	GO:MF	0.00544177	signaling receptor activity	5035	GO:0060089	ENSOMYG00000000423,ENSOMYG00000000957,ENSOMYG00000001367,ENSOMYG00000001763,ENSOMYG00000003152,ENSOMYG00000003894,ENSOMYG00000004014,ENSOMYG00000004272,ENSOMYG00000004532,ENSOMYG00000004977,ENSOMYG00000005515,ENSOMYG00000006735,ENSOMYG00000007086,ENSOMYG00000007583,ENSOMYG00000008125,ENSOMYG00000008173,ENSOMYG00000008806,ENSOMYG00000009204,ENSOMYG00000009464,ENSOMYG00000009511,ENSOMYG00000009619,…	TRUE	TRUE	1819	1629	114	0.0699816	0.0626718
GO:0060089	GO:MF	0.00544177	molecular transducer activity	7796	GO:0003674	ENSOMYG00000000423,ENSOMYG00000000957,ENSOMYG00000001367,ENSOMYG00000001763,ENSOMYG00000003152,ENSOMYG00000003894,ENSOMYG00000004014,ENSOMYG00000004272,ENSOMYG00000004532,ENSOMYG00000004977,ENSOMYG00000005515,ENSOMYG00000006735,ENSOMYG00000007086,ENSOMYG00000007583,ENSOMYG00000008125,ENSOMYG00000008173,ENSOMYG00000008806,ENSOMYG00000009204,ENSOMYG00000009464,ENSOMYG00000009511,ENSOMYG00000009619,…	FALSE	TRUE	1819	1629	114	0.0699816	0.0626718
GO:0016538	GO:MF	0.00594366	cyclin-dependent protein serine/threonine kinase regulator activity	2789	GO:0019887	ENSOMYG00000017016,ENSOMYG00000021360,ENSOMYG00000030474,ENSOMYG00000034475,ENSOMYG00000038524,ENSOMYG00000039583,ENSOMYG00000041216,ENSOMYG00000047653,ENSOMYG00000053448,ENSOMYG00000054974	TRUE	TRUE	59	1629	10	0.00613874	0.169492
GO:0016829	GO:MF	0.00594366	lyase activity	2962	GO:0003824	ENSOMYG00000000669,ENSOMYG00000001289,ENSOMYG00000001466,ENSOMYG00000005055,ENSOMYG00000010164,ENSOMYG00000011163,ENSOMYG00000013814,ENSOMYG00000015551,ENSOMYG00000016252,ENSOMYG00000016829,ENSOMYG00000017547,ENSOMYG00000017920,ENSOMYG00000022727,ENSOMYG00000023175,ENSOMYG00000028327,ENSOMYG00000031059,ENSOMYG00000038875,ENSOMYG00000041518,ENSOMYG00000045496,ENSOMYG00000051938,ENSOMYG00000055790,…	FALSE	TRUE	243	1629	24	0.014733	0.0987654
GO:0008017	GO:MF	0.00594366	microtubule binding	1503	GO:0015631	ENSOMYG00000001986,ENSOMYG00000004181,ENSOMYG00000007756,ENSOMYG00000012149,ENSOMYG00000022521,ENSOMYG00000023514,ENSOMYG00000023590,ENSOMYG00000027484,ENSOMYG00000030222,ENSOMYG00000038405,ENSOMYG00000039505,ENSOMYG00000040071,ENSOMYG00000041944,ENSOMYG00000042914,ENSOMYG00000044507,ENSOMYG00000045084,ENSOMYG00000045682,ENSOMYG00000046774,ENSOMYG00000051819,ENSOMYG00000061824,ENSOMYG00000064984,…	TRUE	TRUE	228	1629	23	0.0141191	0.100877
GO:0048018	GO:MF	0.00685174	receptor ligand activity	6728	GO:0005102, GO:0030546	ENSOMYG00000003616,ENSOMYG00000005081,ENSOMYG00000007493,ENSOMYG00000009171,ENSOMYG00000012483,ENSOMYG00000016183,ENSOMYG00000017291,ENSOMYG00000019175,ENSOMYG00000020171,ENSOMYG00000020175,ENSOMYG00000020181,ENSOMYG00000020185,ENSOMYG00000020265,ENSOMYG00000020294,ENSOMYG00000020744,ENSOMYG00000020749,ENSOMYG00000021533,ENSOMYG00000022444,ENSOMYG00000023120,ENSOMYG00000023515,ENSOMYG00000026966,…	FALSE	TRUE	532	1629	42	0.0257827	0.0789474
GO:0030546	GO:MF	0.00685174	signaling receptor activator activity	3713	GO:0030545, GO:0140677	ENSOMYG00000003616,ENSOMYG00000005081,ENSOMYG00000007493,ENSOMYG00000009171,ENSOMYG00000012483,ENSOMYG00000016183,ENSOMYG00000017291,ENSOMYG00000019175,ENSOMYG00000020171,ENSOMYG00000020175,ENSOMYG00000020181,ENSOMYG00000020185,ENSOMYG00000020265,ENSOMYG00000020294,ENSOMYG00000020744,ENSOMYG00000020749,ENSOMYG00000021533,ENSOMYG00000022444,ENSOMYG00000023120,ENSOMYG00000023515,ENSOMYG00000026966,…	TRUE	TRUE	532	1629	42	0.0257827	0.0789474
GO:0000030	GO:MF	0.00709582	mannosyltransferase activity	8	GO:0016758	ENSOMYG00000000940,ENSOMYG00000011845,ENSOMYG00000030955,ENSOMYG00000057268,ENSOMYG00000073963	TRUE	TRUE	15	1629	5	0.00306937	0.333333
GO:0015318	GO:MF	0.00709582	inorganic molecular entity transmembrane transporter activity	2438	GO:0022857	ENSOMYG00000002665,ENSOMYG00000003774,ENSOMYG00000004443,ENSOMYG00000005354,ENSOMYG00000008139,ENSOMYG00000008952,ENSOMYG00000010100,ENSOMYG00000010421,ENSOMYG00000012991,ENSOMYG00000013424,ENSOMYG00000014354,ENSOMYG00000017229,ENSOMYG00000017847,ENSOMYG00000018924,ENSOMYG00000019093,ENSOMYG00000019684,ENSOMYG00000019964,ENSOMYG00000020212,ENSOMYG00000020219,ENSOMYG00000021414,ENSOMYG00000021621,…	FALSE	TRUE	774	1629	56	0.0343769	0.0723514
GO:0030545	GO:MF	0.00895731	signaling receptor regulator activity	3712	GO:0098772	ENSOMYG00000003616,ENSOMYG00000005081,ENSOMYG00000007493,ENSOMYG00000009171,ENSOMYG00000012483,ENSOMYG00000016183,ENSOMYG00000017291,ENSOMYG00000019175,ENSOMYG00000020171,ENSOMYG00000020175,ENSOMYG00000020181,ENSOMYG00000020185,ENSOMYG00000020265,ENSOMYG00000020294,ENSOMYG00000020744,ENSOMYG00000020749,ENSOMYG00000021533,ENSOMYG00000022444,ENSOMYG00000023120,ENSOMYG00000023515,ENSOMYG00000026966,…	FALSE	TRUE	541	1629	42	0.0257827	0.077634
GO:0015085	GO:MF	0.01234	calcium ion transmembrane transporter activity	2268	GO:0046873	ENSOMYG00000013424,ENSOMYG00000018924,ENSOMYG00000020212,ENSOMYG00000025609,ENSOMYG00000030441,ENSOMYG00000031339,ENSOMYG00000036455,ENSOMYG00000037257,ENSOMYG00000041322,ENSOMYG00000045363,ENSOMYG00000051074,ENSOMYG00000052151,ENSOMYG00000053628,ENSOMYG00000056592,ENSOMYG00000060570,ENSOMYG00000066681	FALSE	TRUE	142	1629	16	0.00982198	0.112676
GO:0004888	GO:MF	0.0139289	transmembrane signaling receptor activity	1126	GO:0038023	ENSOMYG00000000423,ENSOMYG00000000957,ENSOMYG00000001367,ENSOMYG00000003152,ENSOMYG00000003894,ENSOMYG00000004014,ENSOMYG00000004272,ENSOMYG00000004532,ENSOMYG00000004977,ENSOMYG00000005515,ENSOMYG00000006735,ENSOMYG00000007086,ENSOMYG00000007583,ENSOMYG00000008125,ENSOMYG00000008173,ENSOMYG00000008806,ENSOMYG00000009204,ENSOMYG00000009464,ENSOMYG00000009511,ENSOMYG00000009619,ENSOMYG00000012124,…	FALSE	TRUE	1650	1629	102	0.0626151	0.0618182
GO:0016841	GO:MF	0.0145325	ammonia-lyase activity	2972	GO:0016840	ENSOMYG00000001289,ENSOMYG00000011163,ENSOMYG00000038875	FALSE	TRUE	5	1629	3	0.00184162	0.6
GO:0015631	GO:MF	0.0146927	tubulin binding	2611	GO:0008092	ENSOMYG00000000815,ENSOMYG00000001986,ENSOMYG00000004181,ENSOMYG00000007756,ENSOMYG00000012149,ENSOMYG00000022521,ENSOMYG00000023514,ENSOMYG00000023590,ENSOMYG00000027484,ENSOMYG00000030222,ENSOMYG00000038405,ENSOMYG00000039505,ENSOMYG00000040071,ENSOMYG00000041944,ENSOMYG00000042914,ENSOMYG00000044507,ENSOMYG00000045084,ENSOMYG00000045682,ENSOMYG00000046774,ENSOMYG00000051819,ENSOMYG00000061824,…	FALSE	TRUE	263	1629	24	0.014733	0.0912548
GO:0003774	GO:MF	0.0146927	cytoskeletal motor activity	356	GO:0003674	ENSOMYG00000001429,ENSOMYG00000006658,ENSOMYG00000007756,ENSOMYG00000012149,ENSOMYG00000016715,ENSOMYG00000022521,ENSOMYG00000023590,ENSOMYG00000027484,ENSOMYG00000038405,ENSOMYG00000039505,ENSOMYG00000041944,ENSOMYG00000044507,ENSOMYG00000045084,ENSOMYG00000046774,ENSOMYG00000046853,ENSOMYG00000050047,ENSOMYG00000051819,ENSOMYG00000053143,ENSOMYG00000069142,ENSOMYG00000071995,ENSOMYG00000076271	FALSE	TRUE	218	1629	21	0.0128913	0.0963303
GO:0140097	GO:MF	0.0146927	catalytic activity, acting on DNA	9315	GO:0140640	ENSOMYG00000001507,ENSOMYG00000001753,ENSOMYG00000005651,ENSOMYG00000005852,ENSOMYG00000009750,ENSOMYG00000010296,ENSOMYG00000011026,ENSOMYG00000013729,ENSOMYG00000019353,ENSOMYG00000019750,ENSOMYG00000029486,ENSOMYG00000030943,ENSOMYG00000031865,ENSOMYG00000034782,ENSOMYG00000035735,ENSOMYG00000041834,ENSOMYG00000042181,ENSOMYG00000042443,ENSOMYG00000046435,ENSOMYG00000070417	FALSE	TRUE	203	1629	20	0.0122775	0.0985222
GO:0003777	GO:MF	0.0165938	microtubule motor activity	357	GO:0003774, GO:0140657	ENSOMYG00000007756,ENSOMYG00000012149,ENSOMYG00000022521,ENSOMYG00000023590,ENSOMYG00000027484,ENSOMYG00000038405,ENSOMYG00000039505,ENSOMYG00000041944,ENSOMYG00000044507,ENSOMYG00000045084,ENSOMYG00000046774,ENSOMYG00000051819,ENSOMYG00000076271	FALSE	TRUE	107	1629	13	0.00798036	0.121495
GO:0005102	GO:MF	0.0185755	signaling receptor binding	1258	GO:0005515	ENSOMYG00000003616,ENSOMYG00000005081,ENSOMYG00000007493,ENSOMYG00000009171,ENSOMYG00000012483,ENSOMYG00000015432,ENSOMYG00000016183,ENSOMYG00000017291,ENSOMYG00000019175,ENSOMYG00000020171,ENSOMYG00000020175,ENSOMYG00000020181,ENSOMYG00000020185,ENSOMYG00000020265,ENSOMYG00000020294,ENSOMYG00000020744,ENSOMYG00000020749,ENSOMYG00000021476,ENSOMYG00000021533,ENSOMYG00000022444,ENSOMYG00000023120,…	FALSE	TRUE	940	1629	63	0.038674	0.0670213
GO:0098772	GO:MF	0.0192187	molecular function regulator activity	8575	GO:0003674	ENSOMYG00000002596,ENSOMYG00000002634,ENSOMYG00000003248,ENSOMYG00000003360,ENSOMYG00000003616,ENSOMYG00000003827,ENSOMYG00000005081,ENSOMYG00000006284,ENSOMYG00000006650,ENSOMYG00000007493,ENSOMYG00000009171,ENSOMYG00000009461,ENSOMYG00000012483,ENSOMYG00000012617,ENSOMYG00000013175,ENSOMYG00000013515,ENSOMYG00000014568,ENSOMYG00000016183,ENSOMYG00000016417,ENSOMYG00000017016,ENSOMYG00000017291,…	FALSE	TRUE	1655	1629	101	0.0620012	0.0610272
GO:0016840	GO:MF	0.0239299	carbon-nitrogen lyase activity	2971	GO:0016829	ENSOMYG00000000669,ENSOMYG00000001289,ENSOMYG00000011163,ENSOMYG00000028327,ENSOMYG00000038875	FALSE	TRUE	20	1629	5	0.00306937	0.25
GO:0019207	GO:MF	0.0253788	kinase regulator activity	3432	GO:0030234	ENSOMYG00000017016,ENSOMYG00000021360,ENSOMYG00000023105,ENSOMYG00000030474,ENSOMYG00000034475,ENSOMYG00000038524,ENSOMYG00000039583,ENSOMYG00000041216,ENSOMYG00000047653,ENSOMYG00000051305,ENSOMYG00000053448,ENSOMYG00000054974,ENSOMYG00000058161	FALSE	TRUE	113	1629	13	0.00798036	0.115044
GO:0005125	GO:MF	0.0254856	cytokine activity	1274	GO:0048018	ENSOMYG00000003616,ENSOMYG00000005081,ENSOMYG00000012483,ENSOMYG00000017291,ENSOMYG00000022444,ENSOMYG00000026966,ENSOMYG00000032623,ENSOMYG00000032727,ENSOMYG00000052953,ENSOMYG00000065456,ENSOMYG00000066326,ENSOMYG00000068021,ENSOMYG00000069047,ENSOMYG00000073327	FALSE	TRUE	127	1629	14	0.00859423	0.110236
GO:0004378	GO:MF	0.0263766	GDP-Man:Man1GlcNAc2-PP-Dol alpha-1,3-mannosyltransferase activity	723	GO:0000033, GO:0004376	ENSOMYG00000030955,ENSOMYG00000057268	FALSE	TRUE	2	1629	2	0.00122775	1
GO:0015079	GO:MF	0.0263766	potassium ion transmembrane transporter activity	2264	GO:0046873	ENSOMYG00000002665,ENSOMYG00000003774,ENSOMYG00000005354,ENSOMYG00000008139,ENSOMYG00000008952,ENSOMYG00000010100,ENSOMYG00000010421,ENSOMYG00000012991,ENSOMYG00000017847,ENSOMYG00000019093,ENSOMYG00000019684,ENSOMYG00000020219,ENSOMYG00000024619,ENSOMYG00000026668,ENSOMYG00000028578,ENSOMYG00000029958,ENSOMYG00000030588,ENSOMYG00000039686,ENSOMYG00000042789,ENSOMYG00000043033,ENSOMYG00000055945,…	FALSE	TRUE	295	1629	25	0.0153468	0.0847458
GO:0003688	GO:MF	0.0263766	DNA replication origin binding	328	GO:1990837	ENSOMYG00000022528,ENSOMYG00000029221	TRUE	TRUE	2	1629	2	0.00122775	1
GO:0000033	GO:MF	0.0263766	alpha-1,3-mannosyltransferase activity	10	GO:0000030	ENSOMYG00000030955,ENSOMYG00000057268	FALSE	TRUE	2	1629	2	0.00122775	1
GO:0004506	GO:MF	0.0263766	squalene monooxygenase activity	823	GO:0016709	ENSOMYG00000004701,ENSOMYG00000029693	TRUE	TRUE	2	1629	2	0.00122775	1
GO:0008009	GO:MF	0.0268396	chemokine activity	1498	GO:0005125, GO:0042379	ENSOMYG00000012483,ENSOMYG00000022444,ENSOMYG00000026966,ENSOMYG00000032623,ENSOMYG00000032727,ENSOMYG00000052953,ENSOMYG00000065456,ENSOMYG00000066326,ENSOMYG00000069047,ENSOMYG00000073327	FALSE	TRUE	76	1629	10	0.00613874	0.131579
GO:0042379	GO:MF	0.0268396	chemokine receptor binding	5133	GO:0001664, GO:0005126	ENSOMYG00000012483,ENSOMYG00000022444,ENSOMYG00000026966,ENSOMYG00000032623,ENSOMYG00000032727,ENSOMYG00000052953,ENSOMYG00000065456,ENSOMYG00000066326,ENSOMYG00000069047,ENSOMYG00000073327	FALSE	TRUE	76	1629	10	0.00613874	0.131579
GO:0005179	GO:MF	0.030512	hormone activity	1323	GO:0048018	ENSOMYG00000019175,ENSOMYG00000020171,ENSOMYG00000020175,ENSOMYG00000020181,ENSOMYG00000020185,ENSOMYG00000020294,ENSOMYG00000020749,ENSOMYG00000021533,ENSOMYG00000023120,ENSOMYG00000023515,ENSOMYG00000031832,ENSOMYG00000032453,ENSOMYG00000036798,ENSOMYG00000038605,ENSOMYG00000044479,ENSOMYG00000045545,ENSOMYG00000045550,ENSOMYG00000056549,ENSOMYG00000072454	FALSE	TRUE	206	1629	19	0.0116636	0.092233
GO:0003700	GO:MF	0.030512	DNA-binding transcription factor activity	336	GO:0140110	ENSOMYG00000000651,ENSOMYG00000000886,ENSOMYG00000001248,ENSOMYG00000001763,ENSOMYG00000001986,ENSOMYG00000004180,ENSOMYG00000004292,ENSOMYG00000005629,ENSOMYG00000007057,ENSOMYG00000008695,ENSOMYG00000008919,ENSOMYG00000011219,ENSOMYG00000011488,ENSOMYG00000011528,ENSOMYG00000011661,ENSOMYG00000012048,ENSOMYG00000012434,ENSOMYG00000012745,ENSOMYG00000016119,ENSOMYG00000016663,ENSOMYG00000016957,…	TRUE	TRUE	1347	1629	83	0.0509515	0.0616184
GO:0008094	GO:MF	0.030512	ATP-dependent activity, acting on DNA	1526	GO:0140097, GO:0140657	ENSOMYG00000001753,ENSOMYG00000005852,ENSOMYG00000009750,ENSOMYG00000011026,ENSOMYG00000019353,ENSOMYG00000019750,ENSOMYG00000029486,ENSOMYG00000030943,ENSOMYG00000031865,ENSOMYG00000035735,ENSOMYG00000041834,ENSOMYG00000042181,ENSOMYG00000042443	FALSE	TRUE	118	1629	13	0.00798036	0.110169
GO:0005506	GO:MF	0.030512	iron ion binding	1469	GO:0046914	ENSOMYG00000000567,ENSOMYG00000000995,ENSOMYG00000005350,ENSOMYG00000005467,ENSOMYG00000012906,ENSOMYG00000016284,ENSOMYG00000017196,ENSOMYG00000018467,ENSOMYG00000022630,ENSOMYG00000024817,ENSOMYG00000025960,ENSOMYG00000026982,ENSOMYG00000029175,ENSOMYG00000029553,ENSOMYG00000034078,ENSOMYG00000039042,ENSOMYG00000041283,ENSOMYG00000041588,ENSOMYG00000046915,ENSOMYG00000073376	TRUE	TRUE	221	1629	20	0.0122775	0.0904977
GO:0004376	GO:MF	0.0305417	glycolipid mannosyltransferase activity	721	GO:0000030	ENSOMYG00000000940,ENSOMYG00000030955,ENSOMYG00000057268	FALSE	TRUE	7	1629	3	0.00184162	0.428571
GO:0019887	GO:MF	0.0305417	protein kinase regulator activity	3502	GO:0019207	ENSOMYG00000017016,ENSOMYG00000021360,ENSOMYG00000030474,ENSOMYG00000034475,ENSOMYG00000038524,ENSOMYG00000039583,ENSOMYG00000041216,ENSOMYG00000047653,ENSOMYG00000051305,ENSOMYG00000053448,ENSOMYG00000054974,ENSOMYG00000058161	FALSE	TRUE	105	1629	12	0.00736648	0.114286
GO:0022836	GO:MF	0.0305417	gated channel activity	3554	GO:0015267	ENSOMYG00000001367,ENSOMYG00000002665,ENSOMYG00000003774,ENSOMYG00000005354,ENSOMYG00000005515,ENSOMYG00000007086,ENSOMYG00000008952,ENSOMYG00000009464,ENSOMYG00000010421,ENSOMYG00000012991,ENSOMYG00000013490,ENSOMYG00000015167,ENSOMYG00000017847,ENSOMYG00000018814,ENSOMYG00000018924,ENSOMYG00000019684,ENSOMYG00000020212,ENSOMYG00000020219,ENSOMYG00000021621,ENSOMYG00000026399,ENSOMYG00000026668,…	FALSE	TRUE	575	1629	41	0.0251688	0.0713043
GO:0031418	GO:MF	0.0305417	L-ascorbic acid binding	3889	GO:0019842, GO:0031406, GO:0048029, GO:0097159, GO:1901363	ENSOMYG00000012906,ENSOMYG00000018467,ENSOMYG00000022630,ENSOMYG00000025960,ENSOMYG00000029553,ENSOMYG00000041283	FALSE	TRUE	32	1629	6	0.00368324	0.1875
GO:0005267	GO:MF	0.0305417	potassium channel activity	1367	GO:0005261, GO:0015079	ENSOMYG00000002665,ENSOMYG00000003774,ENSOMYG00000005354,ENSOMYG00000008952,ENSOMYG00000010100,ENSOMYG00000010421,ENSOMYG00000012991,ENSOMYG00000017847,ENSOMYG00000019093,ENSOMYG00000019684,ENSOMYG00000020219,ENSOMYG00000026668,ENSOMYG00000028578,ENSOMYG00000029958,ENSOMYG00000030588,ENSOMYG00000039686,ENSOMYG00000042789,ENSOMYG00000043033,ENSOMYG00000055945,ENSOMYG00000062919,ENSOMYG00000069341,…	FALSE	TRUE	270	1629	23	0.0141191	0.0851852
GO:0004930	GO:MF	0.0323608	G protein-coupled receptor activity	1154	GO:0004888	ENSOMYG00000000423,ENSOMYG00000000957,ENSOMYG00000003152,ENSOMYG00000003894,ENSOMYG00000004014,ENSOMYG00000004532,ENSOMYG00000007583,ENSOMYG00000008125,ENSOMYG00000008173,ENSOMYG00000009204,ENSOMYG00000009511,ENSOMYG00000012124,ENSOMYG00000012144,ENSOMYG00000014218,ENSOMYG00000014370,ENSOMYG00000014589,ENSOMYG00000014689,ENSOMYG00000015927,ENSOMYG00000016001,ENSOMYG00000017681,ENSOMYG00000017855,…	FALSE	TRUE	1127	1629	71	0.043585	0.0629991
GO:0140677	GO:MF	0.0335866	molecular function activator activity	9477	GO:0098772	ENSOMYG00000003616,ENSOMYG00000005081,ENSOMYG00000006650,ENSOMYG00000007493,ENSOMYG00000009171,ENSOMYG00000012483,ENSOMYG00000012617,ENSOMYG00000016183,ENSOMYG00000016417,ENSOMYG00000017291,ENSOMYG00000019175,ENSOMYG00000020171,ENSOMYG00000020175,ENSOMYG00000020181,ENSOMYG00000020185,ENSOMYG00000020265,ENSOMYG00000020294,ENSOMYG00000020744,ENSOMYG00000020749,ENSOMYG00000021533,ENSOMYG00000021966,…	FALSE	TRUE	795	1629	53	0.0325353	0.0666667
GO:0001664	GO:MF	0.0338717	G protein-coupled receptor binding	231	GO:0005102	ENSOMYG00000012483,ENSOMYG00000021476,ENSOMYG00000022444,ENSOMYG00000026966,ENSOMYG00000032494,ENSOMYG00000032623,ENSOMYG00000032727,ENSOMYG00000048908,ENSOMYG00000052953,ENSOMYG00000065456,ENSOMYG00000066326,ENSOMYG00000069047,ENSOMYG00000073327	FALSE	TRUE	121	1629	13	0.00798036	0.107438
GO:0048029	GO:MF	0.0342301	monosaccharide binding	6733	GO:0030246, GO:0036094	ENSOMYG00000012906,ENSOMYG00000018467,ENSOMYG00000022630,ENSOMYG00000025960,ENSOMYG00000029553,ENSOMYG00000032225,ENSOMYG00000041283	FALSE	TRUE	44	1629	7	0.00429711	0.159091
GO:0005388	GO:MF	0.0391629	P-type calcium transporter activity	1435	GO:0015085, GO:0015662, GO:0019829	ENSOMYG00000013424,ENSOMYG00000025609,ENSOMYG00000031339,ENSOMYG00000045363,ENSOMYG00000066681	FALSE	TRUE	24	1629	5	0.00306937	0.208333
GO:0016972	GO:MF	0.0429398	thiol oxidase activity	3041	GO:0015036, GO:0016670	ENSOMYG00000017134,ENSOMYG00000026585,ENSOMYG00000038152	TRUE	TRUE	8	1629	3	0.00184162	0.375
GO:0017080	GO:MF	0.0429398	sodium channel regulator activity	3085	GO:0099106	ENSOMYG00000003827,ENSOMYG00000029610,ENSOMYG00000035130	TRUE	TRUE	8	1629	3	0.00184162	0.375
GO:0015662	GO:MF	0.049062	P-type ion transporter activity	2631	GO:0140358	ENSOMYG00000008139,ENSOMYG00000013424,ENSOMYG00000025609,ENSOMYG00000031339,ENSOMYG00000045363,ENSOMYG00000066681	FALSE	TRUE	36	1629	6	0.00368324	0.166667
GO:0016831	GO:MF	0.049062	carboxy-lyase activity	2964	GO:0016830	ENSOMYG00000010164,ENSOMYG00000013814,ENSOMYG00000016252,ENSOMYG00000022727,ENSOMYG00000023175,ENSOMYG00000041518	TRUE	TRUE	36	1629	6	0.00368324	0.166667
