# Supplementary material for: A meta-analysis of public RNA-Seq data identifies conserved stress responses in rainbow trout
Source: BMC Genomics. 2025 Nov 5;26:999. doi: 10.1186/s12864-025-12127-2 (PMC12590911; doi:10.1186/s12864-025-12127-2)
Supplement: Supplementary file 5 — Supplementary material 5. [file 12864_2025_12127_MOESM5_ESM.xlsx]

## Sheet: KEGG_Meta Analysis
Supplementary Table S6A. Top 22 significantly enriched KEGG pathways from meta-analysis data.
ID	Description	Category	Subcategory	GeneRatio	BgRatio	RichFactor	FoldEnrichment	pvalue	p.adjust	Count
omy04144	Endocytosis	Cellular Processes	Transport and catabolism	462/8897	661/13980	0.698941	1.09826	0.000308649	0.00401244	462
omy04218	Cellular senescence	Cellular Processes	Cell growth and death	308/8897	397/13980	0.775819	1.21906	9.15951e-10	1.66703e-07	308
omy04141	Protein processing in endoplasmic reticulum	Genetic Information Processing	Folding, sorting and degradation	275/8897	381/13980	0.721785	1.13415	0.000215226	0.00346852	275
omy04068	FoxO signaling pathway	Environmental Information Processing	Signal transduction	264/8897	362/13980	0.729282	1.14593	9.1885e-05	0.00167231	264
omy04110	Cell cycle	Cellular Processes	Cell growth and death	255/8897	343/13980	0.74344	1.16818	1.24258e-05	0.000505468	255
omy04120	Ubiquitin mediated proteolysis	Genetic Information Processing	Folding, sorting and degradation	232/8897	310/13980	0.748387	1.17595	1.38865e-05	0.000505468	232
omy03040	Spliceosome	Genetic Information Processing	Transcription	223/8897	300/13980	0.743333	1.16801	4.35244e-05	0.00111812	223
omy03010	Ribosome	Genetic Information Processing	Translation	205/8897	267/13980	0.76779	1.20644	2.26631e-06	0.000137489	205
omy04625	C-type lectin receptor signaling pathway	Organismal Systems	Immune system	202/8897	277/13980	0.729242	1.14587	0.000590245	0.00716164	202
omy04114	Oocyte meiosis	Cellular Processes	Cell growth and death	195/8897	261/13980	0.747126	1.17397	7.79122e-05	0.00157556	195
omy04137	Mitophagy - animal	Cellular Processes	Transport and catabolism	193/8897	265/13980	0.728302	1.14439	0.000861267	0.00979692	193
omy00190	Oxidative phosphorylation	Metabolism	Energy metabolism	187/8897	253/13980	0.73913	1.16141	0.000293525	0.00401244	187
omy04914	Progesterone-mediated oocyte maturation	Organismal Systems	Endocrine system	157/8897	204/13980	0.769608	1.2093	2.70218e-05	0.000819661	157
omy03013	Nucleocytoplasmic transport	Genetic Information Processing	Translation	155/8897	206/13980	0.752427	1.1823	0.000228694	0.00346852	155
omy04115	p53 signaling pathway	Cellular Processes	Cell growth and death	128/8897	172/13980	0.744186	1.16935	0.00162467	0.0164273	128
omy03008	Ribosome biogenesis in eukaryotes	Genetic Information Processing	Translation	111/8897	151/13980	0.735099	1.15507	0.00625578	0.0495023	111
omy00600	Sphingolipid metabolism	Metabolism	Lipid metabolism	95/8897	118/13980	0.805085	1.26504	4.91481e-05	0.00111812	95
omy00260	Glycine, serine and threonine metabolism	Metabolism	Amino acid metabolism	59/8897	74/13980	0.797297	1.25281	0.00205785	0.0197121	59
omy04136	Autophagy - other	Cellular Processes	Transport and catabolism	57/8897	62/13980	0.919355	1.4446	2.98448e-07	2.71588e-05	57
omy00670	One carbon pool by folate	Metabolism	Metabolism of cofactors and vitamins	56/8897	70/13980	0.8	1.25705	0.00229914	0.0209222	56
omy01040	Biosynthesis of unsaturated fatty acids	Metabolism	Lipid metabolism	53/8897	67/13980	0.791045	1.24298	0.00469547	0.0388443	53
omy03020	RNA polymerase	Genetic Information Processing	Transcription	42/8897	50/13980	0.84	1.31991	0.00132963	0.0142349	42

## Sheet: KEGG_Heat Stress
Supplementary Table S6B: Significantly enriched KEGG pathways from combined heat stress datasets.
Category	Subcategory	ID	Description	GeneRatio	BgRatio	RichFactor	FoldEnrichment	zScore	pvalue	p.adjust	qvalue	geneID	Count
Cellular Processes	Transport and catabolism	omy04136	Autophagy - other	47/5875	62/13980	0.758065	1.80387	5.40081	6.35111e-08	2.88976e-06	2.15604e-06	110525986/118936409/110534090/110534114/110514282/110537275/110524873/110531818/110495622/110485632/110487761/110485936/100136134/110524740/110486995/110526208/110493661/110537728/110504653/110533658/110526131/110534218/110502931/110489177/110504529/110523185/110538483/110509637/110509134/110530479/110528796/100305187/110495766/110500468/110504046/110506324/110509534/110537273/110534163/110513171…	47
Genetic Information Processing	Transcription	omy03020	RNA polymerase	36/5875	50/13980	0.72	1.71329	4.30173	1.67245e-05	0.000304386	0.000227101	110486341/118943825/110531748/110527682/110530641/110520848/110487910/110497820/110486419/110531828/110536035/110486436/110538352/110526594/110506010/110498861/110503600/100305159/110506665/110488226/110500684/110538462/100301701/110504493/110507479/100305324/100305160/110488858/110505057/110496722/100301746/100301820/110504733/110531274/110493809/110496350	36
Metabolism	Metabolism of cofactors and vitamins	omy00670	One carbon pool by folate	49/5875	70/13980	0.7	1.6657	4.75369	1.96768e-06	5.96864e-05	4.45318e-05	110520495/110527472/110523447/100136726/110527644/110528086/110524183/110537066/110492324/110525703/110525708/110532243/110527222/110528507/110492690/110494773/110521627/110527589/110536425/110536073/110536081/110521990/110489946/110522392/110491842/110502651/110523691/110496216/110497985/110528815/110509664/110535832/110490242/110500231/110490304/110506251/110521345/110526391/110492846/110509902…	49
Metabolism	Amino acid metabolism	omy00260	Glycine, serine and threonine metabolism	47/5875	74/13980	0.635135	1.51135	3.75491	0.000152483	0.00173449	0.0012941	110525913/110520495/110524165/110528663/110523447/110529158/110520091/100136726/110536504/110524183/110492324/110536118/110494837/110493407/118940026/110530082/110500043/110494773/110521627/110536779/110502667/110486537/110496216/110509664/110535832/110498016/110501356/110523651/110506251/110497718/110504053/110499339/110486385/110538408/110521345/110524766/110526391/110492846/110492405/110532065…	47
Genetic Information Processing	Translation	omy03010	Ribosome	169/5875	267/13980	0.632959	1.50617	7.10974	1.32053e-12	2.40337e-10	1.79314e-10	110536674/110523371/100135798/110522472/110502382/110520880/110516962/110529255/110526766/110510146/110508899/110524136/110530139/110508756/110536796/110537987/110497399/110522473/110537664/110488520/100136047/110488236/110529358/110488717/110533477/110528292/100301793/110527735/110494133/110487816/110496774/100136044/100305336/110530875/110489616/110524214/110497379/110534513/100301803/110488158…	169
Metabolism	Carbohydrate metabolism	omy00040	Pentose and glucuronate interconversions	36/5875	58/13980	0.62069	1.47698	3.09903	0.0016181	0.011397	0.00850329	110500636/110500630/110536871/110533254/110533256/110525460/110525461/110537844/110537351/110492262/110533291/110520403/110520436/110531670/110530530/110489961/110490236/110501489/110500688/110491705/110489735/110526353/110526354/110486011/110524697/110503760/110506435/110506462/110501343/110534110/110531757/118943941/110518820/110506463/110506464/118936829	36
Genetic Information Processing	Transcription	omy03022	Basal transcription factors	39/5875	63/13980	0.619048	1.47307	3.20397	0.00113044	0.0108285	0.00807906	100301802/110531860/110490388/110486769/110492048/110493593/110530090/110499288/110522563/110493473/110536433/110490132/110524253/110491882/110532625/100301732/100305189/110537369/110505624/118936673/110529763/110485751/110526865/110537411/100305219/110507601/110508956/110532418/110492390/110511313/110519054/110532267/110515921/110518813/100136048/110516736/118936674/110520743/110492630	39
Genetic Information Processing	Translation	omy03013	Nucleocytoplasmic transport	127/5875	206/13980	0.616505	1.46702	5.74915	8.80078e-09	5.33914e-07	3.98351e-07	110494780/110492327/110520657/110524956/110487670/110527312/110533813/110520522/100135786/110486328/110538272/100305168/110486414/110496759/110496613/110485929/110530896/110495638/110494764/110485860/110493591/110486198/110524821/110486936/110537851/110531633/110522162/110520211/110500260/110500263/110498091/110505740/110495871/100301765/110535429/110530535/110486084/110537879/110497439/110534440…	127
Genetic Information Processing	Replication and repair	omy03460	Fanconi anemia pathway	42/5875	69/13980	0.608696	1.44844	3.17916	0.00120587	0.0108772	0.00811546	110528840/110525187/110497577/110532239/110532869/110524022/110534079/110499212/110525375/110531921/110522147/110517694/100305185/110524030/110494663/110494295/110535276/110538253/110522302/110503940/110491838/110497067/110528620/110501650/110532742/110505258/110489732/110489231/110487063/110507776/110525790/110507673/110529197/110490044/110501306/110508974/110494269/110517576/110528664/110513777…	42
Genetic Information Processing	Replication and repair	omy03420	Nucleotide excision repair	52/5875	86/13980	0.604651	1.43881	3.4752	0.000418842	0.00448407	0.00334555	110527682/110530641/100301737/118966692/110531828/110517694/110536382/100305185/110486436/110538352/110534039/110535757/110526176/110536433/110498188/110536956/110503940/110486472/110506010/110536302/110535104/110534453/110497398/100301732/110524454/110505624/100305159/110506665/110506294/110538316/110500684/110489231/110521582/110504493/110523965/110488965/100305324/100305160/110488858/110505057…	52
Genetic Information Processing	Folding, sorting and degradation	omy04130	SNARE interactions in vesicular transport	45/5875	75/13980	0.6	1.42774	3.16224	0.00125506	0.0108772	0.00811546	110535756/100305345/110523395/110530065/110521492/100305243/110523468/110489112/110538226/110524841/110531939/110486291/110528472/100305302/100305254/110494188/110536313/110504670/110499141/110524094/110525586/110533335/110524504/110509688/110485805/110497590/110525934/110505824/110506004/110536263/110537539/110491515/110507690/110509980/110529543/110508985/110493554/110493983/110528243/110488019…	45
Metabolism	Carbohydrate metabolism	omy00630	Glyoxylate and dicarboxylate metabolism	39/5875	66/13980	0.590909	1.40611	2.81551	0.00378249	0.0229471	0.0171207	110527513/110525913/110492324/110485610/110530856/110486418/110530082/110495360/110494773/110521627/110490868/100136010/110524626/110495699/110529882/110532556/110501666/110493756/110496216/110533684/110492108/110492305/110526316/100135974/110535832/110495055/110499176/110486012/110486039/110521345/110526391/110492846/110532102/110506512/110513528/110517888/118936590/110485515/110487262	39
Genetic Information Processing	Replication and repair	omy03030	DNA replication	33/5875	56/13980	0.589286	1.40225	2.56787	0.00786544	0.0409003	0.0305155	110530628/110520519/110489044/100301737/100301719/118966692/100305327/110517694/110536382/100305185/110534039/110535757/110498188/110503940/110535104/110535443/110524454/110530465/110538499/110529818/110489231/110521582/118938208/110528595/110489022/110507776/110490261/110530008/110525832/110487419/110534257/110529168/110486088	33
Genetic Information Processing	Transcription	omy03040	Spliceosome	176/5875	300/13980	0.586667	1.39602	5.90333	3.37546e-09	3.07167e-07	2.29176e-07	110508575/110487670/110530780/100305297/110527293/110527295/110508724/110533227/110536762/110508966/110537051/110486583/110538542/110529920/110536367/100305168/110486688/110538643/110488721/110521822/110535938/110487890/110525710/110494852/110521077/110492257/110497451/110528893/110528306/110488617/100135836/110485929/110533497/110517101/110529829/100301696/110496421/110538582/110537352/110492689…	176
Metabolism	Metabolism of cofactors and vitamins	omy00860	Porphyrin metabolism	54/5875	95/13980	0.568421	1.3526	2.93587	0.00247036	0.0160574	0.0119803	110500636/110500630/110528663/110512261/110487001/110512532/110494837/110536871/110533254/110525460/110525461/110491654/110537844/110534779/110537351/110524827/110492262/110533291/110531670/110535493/110507390/110537947/118936428/118936485/118937703/100136294/100136293/110537944/110537954/100136295/110537946/110537941/110489961/110486536/110503591/110515215/100301692/110534248/110505247/110501489…	54
Metabolism	Energy metabolism	omy00190	Oxidative phosphorylation	142/5875	253/13980	0.561265	1.33557	4.58588	3.62416e-06	9.42283e-05	7.03033e-05	110488064/110520174/110531574/110523434/110531654/110508696/110503510/110527651/110509074/110537243/110486176/110538487/110485500/110538823/110488719/110497443/110492247/110490443/110500036/110520756/110532877/100301811/110498798/110521926/110537888/110530857/110486787/110492046/110496618/110486264/110495579/110535720/100653434/110538650/100305271/110532257/110532258/110524223/110527679/110529770…	142
Genetic Information Processing	Folding, sorting and degradation	omy04120	Ubiquitin mediated proteolysis	173/5875	310/13980	0.558065	1.32796	4.97139	5.44445e-07	1.98178e-05	1.4786e-05	110521470/100135798/110522112/110508899/110524136/110530139/110524540/110510106/110527957/110523047/110530801/110508838/110536976/110488020/110488035/110515597/110488702/110536499/110486177/110535929/110486328/110538272/110488721/100136237/110537671/110535706/110490612/110490613/110491624/110498306/110494307/110519964/110487443/110487456/110485931/110493657/110535412/110530310/110486196/110496423…	173
Metabolism	Amino acid metabolism	omy00270	Cysteine and methionine metabolism	58/5875	104/13980	0.557692	1.32707	2.8503	0.00315688	0.0198121	0.0147817	110520495/110527472/110520091/100136726/110527644/110528086/110536504/110523310/110537069/110524183/110537066/110525708/110532297/110490604/110531067/110494916/110500186/110492690/110538599/110486641/110494358/110532515/110500268/110524884/110536081/110536779/110524422/110532317/100136010/110502651/110490189/110523691/110520559/110525260/110509664/110490242/110500231/110490300/110486012/110506251…	58
Cellular Processes	Transport and catabolism	omy04137	Mitophagy - animal	146/5875	265/13980	0.550943	1.31101	4.35177	1.03901e-05	0.000236375	0.000176358	110506298/100302643/100135798/110521366/110508899/110524136/110530139/110532582/101268941/110529912/110536016/110488230/110488604/110537275/110486260/110538189/110491237/110536119/110497629/100170208/110528142/110531818/110515550/110536876/110493986/110492053/110531824/110494903/110508391/110531834/110531709/110537856/100136134/110524027/110535949/110524811/110499378/110520732/118936609/110496662…	146
Genetic Information Processing	Translation	omy03008	Ribosome biogenesis in eukaryotes	82/5875	151/13980	0.543046	1.29222	3.07374	0.00148941	0.011397	0.00850329	110512218/100305178/110530214/110493986/110497020/110486195/110522080/110520732/118936609/110524379/110496662/110494006/110501551/110497930/110486452/110530259/110528522/110531656/110494472/110536429/110521513/110526053/110488044/110527980/110533406/110497439/110534440/100301754/110494569/110523881/110533950/110507876/110537348/110488421/110496050/110538837/100301792/110526880/110509095/110509098…	82
Cellular Processes	Cell growth and death	omy04216	Ferroptosis	60/5875	111/13980	0.540541	1.28626	2.57786	0.00684823	0.0366582	0.0273505	110514282/110532297/110531824/110491654/110489635/100301743/100653457/110497495/110524827/110486995/110520394/110501553/110536411/110506115/100135867/110524422/110491208/110527685/110537947/118936428/118936485/118937703/100136294/100136293/110537944/110537954/100136295/110537946/110537941/110486536/110537737/100136737/110500797/100301692/110536186/110533969/110530588/110500680/110509090/110527319…	60
Cellular Processes	Cell growth and death	omy04115	p53 signaling pathway	92/5875	172/13980	0.534884	1.2728	3.0648	0.0015046	0.011397	0.00850329	100301708/110523127/110526223/110526228/100305340/110528083/110530629/110530431/110531459/110526255/110513832/110529910/110529176/110528986/110529004/110500074/110525880/110531824/110522361/110530310/110522065/100136691/110537353/110496645/110530106/100286815/110520394/110520078/110538228/110497496/110491376/110523488/110536901/110488025/110524616/110494604/110494565/110494354/110536341/110525895…	92
Cellular Processes	Transport and catabolism	omy04142	Lysosome	157/5875	294/13980	0.534014	1.27073	3.9942	4.6813e-05	0.000589187	0.00043959	110523124/100136757/110523365/110521469/110490166/110503198/110525861/110520847/110487810/110531465/110530803/110523451/110485460/110529911/110488719/110486709/110532877/110498305/110496904/100301811/110498798/110521926/110537888/110492046/118940289/110486264/110493961/110522366/110537844/110529710/110489081/110492692/100301847/110538197/110486434/110534396/110485639/110485640/100136261/110529389…	157
Cellular Processes	Cell growth and death	omy04110	Cell cycle	182/5875	343/13980	0.530612	1.26263	4.19276	1.9929e-05	0.000329735	0.000246014	100301708/110490140/110526228/110528083/100136197/110530628/110524540/110527649/110526791/110526255/110513832/110521563/110487854/110497075/110517300/110487857/110525223/110535929/110518846/110525224/110522490/110530162/110529924/110500074/110485267/110485268/110530863/110531824/110519964/110485931/110493657/110495371/110535412/110525240/110499234/100136194/110488280/110519367/100136691/110493323…	182
Genetic Information Processing	Translation	omy03015	mRNA surveillance pathway	98/5875	185/13980	0.52973	1.26053	3.03704	0.00162815	0.011397	0.00850329	110531487/110492327/110487670/110487742/110524168/110527312/110535923/110486660/110538620/110488703/100305168/110528278/110522490/110515194/110522061/110494131/110495874/110488732/110485929/110531833/110495638/110521087/110494764/110488198/110524821/110522515/110529960/110522579/110531633/110500263/110486741/110505740/110537784/110539084/110486084/100301754/110532324/110529206/110493654/110532539…	98
Cellular Processes	Transport and catabolism	omy04146	Peroxisome	81/5875	154/13980	0.525974	1.25159	2.67287	0.00501742	0.0276718	0.0206458	110517910/110531605/110492876/110525913/110530131/110521413/110513733/110527007/110494638/110536118/100305229/110491617/110536123/110494851/100301785/110500378/110532792/110530082/110497495/110493450/110520029/110531631/110535959/110485953/110489397/110535485/110499975/110529627/110494554/110530191/110535424/110485699/110490868/100135912/110535761/110496305/110493501/110523812/110501666/110493756…	81
Cellular Processes	Cell growth and death	omy04218	Cellular senescence	208/5875	397/13980	0.523929	1.24673	4.24603	1.55031e-05	0.000304386	0.000227101	100301708/110523921/110490140/110522951/110526228/110518416/110528083/110530052/110530129/110532744/110527649/110530431/110531459/110526791/110526255/110513832/110535142/110529912/110486660/110538620/110488702/100136689/110487854/110537065/110530162/110529924/110528986/110497629/100170208/110500074/110499184/110521824/110522530/110500091/110496224/110531824/100305244/110531833/110523476/110531834…	208
Environmental Information Processing	Signal transduction	omy04068	FoxO signaling pathway	189/5875	362/13980	0.522099	1.24237	3.97787	4.85593e-05	0.000589187	0.00043959	100301708/110523127/110490140/110492105/110522951/110526228/110528083/110530052/110530129/110531423/110532744/110497172/110524862/110530797/110526791/118936409/110535142/110529912/100136689/101268945/110530070/110489691/110488604/110537275/110524186/110528986/110497629/100170208/110500074/100136756/110531818/110485267/110485268/110524203/110521824/110491527/110500091/110488417/110527676/110523476…	189
Genetic Information Processing	Folding, sorting and degradation	omy04141	Protein processing in endoplasmic reticulum	198/5875	381/13980	0.519685	1.23663	3.98697	4.64535e-05	0.000589187	0.00043959	118936687/110490122/110521473/110526223/110522112/110527949/110532829/100136780/110524355/110521491/110526273/110488604/110532295/100136237/110493585/110491624/110492833/110530172/110498306/110534337/110489060/110488071/100136147/110504004/110532253/100135836/110487443/110487456/110494903/110508391/110521981/110535412/110489064/110535854/110517301/110488645/110519336/110492689/110487987/110486721…	198
Metabolism	Global and overview maps	omy01240	Biosynthesis of cofactors	147/5875	285/13980	0.515789	1.22736	3.30157	0.000639503	0.00646608	0.00482432	110500636/110500630/100301725/110521798/110528663/110512261/110536504/110537066/110494837/110498290/110491616/110525703/110536871/110533254/110525708/110532297/110489858/110525460/110525461/110524727/110486421/100653478/110519912/101268974/110496409/110537844/100305319/110534779/110537351/110501540/110538599/110492262/110527356/110494773/110497538/118966696/110533291/110533298/110502338/110486641…	147
Genetic Information Processing	Chromosome	omy03083	Polycomb repressive complex	107/5875	209/13980	0.511962	1.21825	2.70653	0.00438766	0.0249548	0.0186187	110522456/110487857/110522058/110486684/110538639/110490449/110520187/110538562/100136237/110538568/110502396/110498306/110535407/110485267/110485268/110486597/110519082/110535410/110528439/110488730/110495371/110535736/110519409/110489090/110504684/110510110/110534117/110492703/110538212/110488210/110494025/110524902/110491399/110498196/110535643/110529864/110497438/110493637/110532136/110534441…	107
Cellular Processes	Cell growth and death	omy04114	Oocyte meiosis	131/5875	261/13980	0.501916	1.19435	2.69836	0.00438433	0.0249548	0.0186187	110522951/110532744/100136197/110524540/110520268/110526255/110513832/110535142/110486660/110538620/110488702/110535929/110522490/110521954/110531869/100136597/110500091/110519964/110485931/110493657/110535412/110529111/110531833/110486718/110538670/100136194/110494762/110494767/110497694/100136691/110493323/110493427/118936477/100136192/110522515/110497737/110502333/110503503/110505729/110507424…	131
Cellular Processes	Transport and catabolism	omy04144	Endocytosis	328/5875	661/13980	0.496218	1.18079	4.05414	3.27852e-05	0.000497243	0.000370991	110510437/110528709/110523136/110530621/110521480/110487493/110495023/110522817/110520265/110529252/110530627/110528256/110527643/110510106/110530798/118936675/110530807/110533814/110526791/110523400/110537113/100305181/110526263/110527770/118936345/110529915/110528777/110521566/110536016/100301824/110522056/110486260/110538189/110530166/110532593/110491618/110496611/110494296/110528143/110495453…	328
Cellular Processes	Transport and catabolism	omy04140	Autophagy - animal	207/5875	424/13980	0.488208	1.16173	2.87914	0.00243383	0.0160574	0.0119803	110535756/110506298/100135798/110531799/118966075/110525986/110530779/110530052/110530129/110531423/110508899/110524136/110530139/110523395/110530807/118936409/110529288/110522122/110526257/110486525/110535142/110528777/110536016/110534090/110534114/100305243/110488604/110514282/110537275/110521954/110528986/100136597/110497629/100170208/110528142/110524873/110531818/110495622/110521824/110488075…	207
Human Diseases	Infectious disease: bacterial	omy05132	Salmonella infection	306/5875	641/13980	0.477379	1.13596	3.00014	0.00160533	0.011397	0.00850329	110522013/110529807/110522464/110539162/110510474/110520886/110523429/110523432/110522951/110526223/110529252/110530052/110532744/100135812/110530629/110527649/110513614/110521454/110520522/110529288/110522122/110528266/110512888/110535244/110535142/110522049/110536234/110536252/118936967/100136689/110537664/110486559/110530438/110536016/110485093/110514295/110488604/110531486/110486260/110538189…	306

## Sheet: KEGG_Hypoxia
Supplementary Table S6B: Significantly enriched KEGG pathways from combined hypoxia stress datasets.
Category	Subcategory	ID	Description	GeneRatio	BgRatio	RichFactor	FoldEnrichment	zScore	pvalue	p.adjust	qvalue	geneID	Count
Cellular Processes	Transport and catabolism	omy04136	Autophagy - other	46/4847	62/13980	0.741935	2.13993	6.55322	2.29666e-10	8.35985e-09	5.9955e-09	110525986/118936409/110534090/110534114/110514282/110537275/110524873/110531818/110495622/110485632/110487761/110485936/100136134/110524740/110486995/110526208/110493661/110537728/110504653/110533658/110526131/110534218/110502931/110489177/110504529/110523185/110538483/110509134/110530479/110528796/100305187/110495766/110500468/110504046/110506324/110509534/110537273/110534163/110513171/110514879…	46
Genetic Information Processing	Transcription	omy03020	RNA polymerase	35/4847	50/13980	0.7	2.01898	5.25827	3.65001e-07	6.64302e-06	4.76422e-06	110486341/118943825/110531748/110527682/110530641/110520848/110487910/110497820/110531828/110536035/110486436/110538352/110526594/110506010/110498861/110503600/100305159/110506665/110488226/110500684/110538462/100301701/110504493/110507479/100305324/100305160/110488858/110505057/110496722/100301746/100301820/110504733/110531274/110493809/110496350	35
Metabolism	Metabolism of cofactors and vitamins	omy00670	One carbon pool by folate	44/4847	70/13980	0.628571	1.81296	4.96734	1.34083e-06	2.21846e-05	1.59103e-05	110520495/110527472/110523447/100136726/110527644/110528086/110524183/110537066/110492324/110525703/110525708/110532243/110527222/110528507/110494773/110521627/110527589/110536073/110536081/110521990/110489946/110522392/110491842/110502651/110523691/110496216/110497985/110509664/110490242/110500231/110490304/110506251/110521345/110492846/110509902/110533399/110532065/110506887/110506892/110506512…	44
Genetic Information Processing	Transcription	omy03022	Basal transcription factors	39/4847	63/13980	0.619048	1.78549	4.55206	9.05911e-06	0.000117768	8.44608e-05	100301802/110531860/110490388/110486769/110492048/110493593/110530090/110499288/110522563/110493473/110536433/110490132/110524253/110491882/110532625/100301732/100305189/110537369/110505624/118936673/110529763/110485751/110526865/110537411/100305219/110507601/110508956/110532418/110492390/110511313/110519054/110532267/110515921/110518813/100136048/110516736/118936674/110520743/110492630	39
Genetic Information Processing	Translation	omy03010	Ribosome	160/4847	267/13980	0.599251	1.72839	8.75435	1.78727e-17	3.25283e-15	2.33286e-15	110536674/110523371/100135798/110522472/110502382/110520880/110516962/110529255/110526766/110510146/110508899/110524136/110530139/110508756/110536796/110537987/110528851/118941085/110497399/110522473/110537664/110488520/100136047/110488236/110529358/110488717/110533477/110528292/100301793/110527735/110494133/110487816/110496774/100136044/100305336/110530875/110489616/110524214/110497379/110534513…	160
Organismal Systems	Digestive system	omy04980	Cobalamin transport and metabolism	20/4847	34/13980	0.588235	1.69662	2.96265	0.00336845	0.0175159	0.012562	110520193/110535451/110525715/110493450/110492703/110497367/110485699/101268953/110489568/100135912/110529882/110522632/110524489/110521277/110526565/110495388/110495389/110519474/110514631/110499554	20
Genetic Information Processing	Translation	omy03013	Nucleocytoplasmic transport	121/4847	206/13980	0.587379	1.69415	7.31183	1.08835e-12	6.60264e-11	4.73527e-11	110494780/110492327/110520657/110524956/110487670/110527312/110533813/110520522/100135786/110486328/110538272/100305168/110486414/110496759/110496613/110485929/110530896/110495638/110494764/110485860/110493591/110486198/110524821/110486936/110537851/110531633/110522162/110520211/110500260/110500263/110498091/110505740/110495871/100301765/110535429/110530535/110486084/110537879/110497439/110534440…	121
Genetic Information Processing	Replication and repair	omy03420	Nucleotide excision repair	50/4847	86/13980	0.581395	1.67689	4.58695	6.95318e-06	9.73445e-05	6.98133e-05	110527682/110530641/100301737/118966692/110531828/110517694/110536382/100305185/110486436/110538352/110534039/110535757/110526176/110536433/110536956/110503940/110486472/110506010/110536302/110535104/110534453/100301732/110524454/110505624/100305159/110506665/110506294/110538316/110500684/110489231/110521582/110504493/110523965/110488965/100305324/100305160/110488858/110505057/110507601/110507776…	50
Metabolism	Carbohydrate metabolism	omy00640	Propanoate metabolism	32/4847	57/13980	0.561404	1.61923	3.41266	0.000716557	0.00483013	0.00346406	110527513/110522458/110523407/110527962/100301669/110530856/110490604/110500378/110495360/110500186/110490468/110520029/110500268/110485953/110497514/110494554/110495699/110529882/110490189/110492305/110526316/110510292/100135807/110520011/110501738/110503282/110505842/110501984/110537238/110521345/110492846/110532102	32
Genetic Information Processing	Replication and repair	omy03030	DNA replication	31/4847	56/13980	0.553571	1.59664	3.25908	0.00118465	0.00770023	0.00552243	110530628/110520519/110489044/100301737/100301719/118966692/100305327/110517694/110536382/100305185/110534039/110535757/110503940/110535104/110535443/110524454/110530465/110538499/110529818/110489231/110521582/118938208/110528595/110489022/110507776/110490261/110530008/110525832/110487419/110534257/110529168	31
Metabolism	Carbohydrate metabolism	omy00630	Glyoxylate and dicarboxylate metabolism	36/4847	66/13980	0.545455	1.57323	3.40051	0.000714276	0.00483013	0.00346406	110527513/110525913/110492324/110485610/110530856/110486418/110530082/110495360/110494773/110521627/110490868/100136010/110524626/110495699/110529882/110532556/110493756/110496216/110533684/110492108/110492305/110526316/100135974/110495055/110499176/110486012/110486039/110521345/110492846/110532102/110506512/110513528/110517888/118936590/110485515/110487262	36
Genetic Information Processing	Folding, sorting and degradation	omy04120	Ubiquitin mediated proteolysis	168/4847	310/13980	0.541935	1.56308	7.30358	9.06102e-13	6.60264e-11	4.73527e-11	110521470/100135798/110522112/110508899/110524136/110530139/110524540/110510106/110527957/110523047/110530801/110508838/110536976/110488020/110488035/110515597/110488702/110536499/110486177/110535929/110486328/110538272/110488721/100136237/110537671/110535706/110490612/110490613/110491624/110498306/110494307/110519964/110487443/110487456/110485931/110493657/110535412/110530310/110486196/110496423…	168
Genetic Information Processing	Transcription	omy03040	Spliceosome	161/4847	300/13980	0.536667	1.54789	6.98836	7.73302e-12	3.51853e-10	2.52341e-10	110508575/110487670/110530780/100305297/110527293/110527295/110508724/110533227/110536762/110508966/110537051/110486583/110538542/110529920/110536367/100305168/110486688/110538643/110488721/110521822/110535938/110487890/110525710/110494852/110521077/110492257/110497451/110528893/110528306/110488617/110485929/110533497/110517101/110529829/100301696/110496421/110538582/110537352/110492769/110522566…	161
Metabolism	Energy metabolism	omy00190	Oxidative phosphorylation	132/4847	253/13980	0.521739	1.50483	5.90318	6.36003e-09	1.92921e-07	1.38358e-07	110488064/110520174/110531574/110523434/110531654/110508696/110503510/110527651/110509074/110537243/110486176/110538487/110485500/110538823/110488719/110497443/110492247/110490443/110500036/110520756/110532877/100301811/110498798/110521926/110537888/110530857/110486787/110492046/110496618/110486264/110495579/110535720/100653434/110538650/100305271/110532257/110532258/110524223/110527679/110529770…	132
Metabolism	Lipid metabolism	omy00071	Fatty acid degradation	38/4847	73/13980	0.520548	1.50139	3.1289	0.00165605	0.0100467	0.00720527	110523407/110526800/118964966/110524371/110500378/110530898/110491659/110497495/110521504/100653436/110527282/110528748/110485680/110490130/100136831/110485953/110503243/110537937/110497793/110533684/110538293/110490007/100329197/110535146/110505842/110497324/110497328/110501984/110524692/110524695/110525808/110485681/110497327/110487136/110538861/110511537/110531877/110497323	38
Metabolism	Amino acid metabolism	omy00260	Glycine, serine and threonine metabolism	38/4847	74/13980	0.513514	1.48111	3.02289	0.00227904	0.0129087	0.00925782	110525913/110520495/110524165/110528663/110523447/110529158/110520091/100136726/110536504/110524183/110492324/110536118/110494837/110493407/118940026/110530082/110500043/110494773/110521627/110536779/110502667/110486537/110496216/110509664/110523651/110506251/110499339/110486385/110538408/110521345/110524766/110492846/110492405/110532065/110506512/110513528/110517888/110521122	38
Cellular Processes	Transport and catabolism	omy04137	Mitophagy - animal	136/4847	265/13980	0.513208	1.48022	5.74958	1.46081e-08	3.79811e-07	2.72392e-07	110506298/100302643/100135798/110508899/110524136/110530139/110532582/101268941/110529912/110536016/110488230/110488604/110537275/110486260/110538189/110491237/110536119/110497629/100170208/110528142/110531818/110515550/110493986/110492053/110531824/110494903/110508391/110531834/110531709/110537856/100136134/110524027/110535949/110524811/110499378/110520732/118936609/110496662/110536055/110520078…	136
Genetic Information Processing	Folding, sorting and degradation	omy03060	Protein export	30/4847	59/13980	0.508475	1.46657	2.61624	0.007573	0.032558	0.0233499	110536017/110534484/110493447/110490009/110524112/110485956/110530371/100305318/110485695/110503251/110503977/100301788/100301709/100305289/110523600/110524110/110528150/110537431/110506942/110496455/110504006/110497681/110527938/110504039/110491430/100136621/110506287/110526644/100135961/110521124	30
Genetic Information Processing	Replication and repair	omy03460	Fanconi anemia pathway	35/4847	69/13980	0.507246	1.46303	2.80881	0.0043195	0.0212473	0.0152381	110528840/110525187/110497577/110532239/110524022/110534079/110499212/110525375/110531921/110522147/110517694/100305185/110524030/110494295/110535276/110538253/110503940/110491838/110497067/110528620/110501650/110532742/110505258/110489732/110489231/110507776/110525790/110529197/110490044/110501306/110494269/110517576/110528664/110487237/110487204	35
Cellular Processes	Cell growth and death	omy04216	Ferroptosis	56/4847	111/13980	0.504505	1.45512	3.50699	0.000432071	0.003419	0.00245203	110514282/110532297/110531824/110491654/110489635/100301743/100653457/110497495/110524827/110486995/110520394/110501553/110506115/100135867/110524422/110491208/110527685/110537947/118936428/118936485/118937703/100136294/100136293/110537944/110537954/100136295/110537946/110537941/100136737/110500797/100301692/110536186/110533969/110530588/110500680/110509090/110527319/110489329/110520018/110485518…	56
Genetic Information Processing	Translation	omy03015	mRNA surveillance pathway	92/4847	185/13980	0.497297	1.43433	4.33228	1.59333e-05	0.000193324	0.000138648	110531487/110492327/110487670/110487742/110524168/110527312/110486660/110538620/110488703/100305168/110528278/110522490/110515194/110522061/110494131/110495874/110488732/110485929/110531833/110495638/110521087/110494764/110488198/110524821/110522515/110529960/110522579/110531633/110500263/110486741/110505740/110539084/110486084/100301754/110532324/110529206/110493654/110532539/110537728/110526299…	92
Genetic Information Processing	Folding, sorting and degradation	omy04130	SNARE interactions in vesicular transport	37/4847	75/13980	0.493333	1.4229	2.67517	0.00613635	0.0286363	0.0205373	110535756/100305345/110523395/110530065/110521492/110538226/110524841/110531939/110486291/110528472/100305302/100305254/110494188/110536313/110504670/110499141/110524094/110533335/110485805/110525934/110505824/110506004/110536263/110491515/110507690/110509980/110529543/110508985/110493554/110493983/110528243/110488019/110487930/110525878/100301864/100301797/110496636	37
Cellular Processes	Transport and catabolism	omy04142	Lysosome	144/4847	294/13980	0.489796	1.4127	5.20997	2.38323e-07	4.81941e-06	3.45637e-06	110523124/100136757/110523365/110521469/110490166/110503198/110525861/110520847/110487810/110531465/110530803/110523451/110485460/110529911/110488719/110486709/110532877/110498305/110496904/100301811/110498798/110521926/110537888/110492046/110486264/110493961/110522366/110537844/110529710/110489081/110492692/100301847/110538197/110486434/110534396/100136261/110529389/110533291/110494654/110494655…	144
Genetic Information Processing	Folding, sorting and degradation	omy03018	RNA degradation	72/4847	149/13980	0.483221	1.39374	3.51997	0.00038372	0.00317441	0.00227661	110530780/100301700/100499608/110518779/110527160/110510175/110495093/110530214/110486783/110538731/110488610/110531058/110534339/110500101/110523163/110499279/110489660/110522080/110488558/110501568/110504772/110498679/110520236/110524212/110520482/110536320/110532316/110498870/110494646/110491424/110538306/110496037/110536793/110517393/110510755/110537512/110527522/110523912/110536456/110492120…	72
Genetic Information Processing	Folding, sorting and degradation	omy04141	Protein processing in endoplasmic reticulum	184/4847	381/13980	0.48294	1.39292	5.66479	1.99315e-08	4.53442e-07	3.25199e-07	118936687/110490122/110521473/110526223/110522112/110527949/110532829/100136780/110524355/100136599/110522488/110521491/110526273/110488604/110532295/100136237/110493585/110491624/110492833/110530172/110524201/110498306/110534337/110535409/110489060/100136147/110504004/110532253/110487443/110487456/110494903/110508391/110521981/110535412/110489064/110535854/110517301/110488645/110519336/110487987…	184
Cellular Processes	Transport and catabolism	omy04146	Peroxisome	73/4847	154/13980	0.474026	1.36721	3.33809	0.000708092	0.00483013	0.00346406	110517910/110531605/110525913/110513733/110527007/110494638/110536118/100305229/110491617/110536123/110494851/100301785/110500378/110532792/110530082/110497495/110493450/110520029/110531631/110535959/110485953/110489397/110535485/110499975/110529627/110494554/110530191/110535424/110485699/110490868/100135912/110535761/110496305/110523812/110493756/110528545/110526135/110510392/110529888/110507826…	73
Genetic Information Processing	Chromosome	omy03083	Polycomb repressive complex	99/4847	209/13980	0.473684	1.36623	3.88606	9.25405e-05	0.000990728	0.000710528	110522456/110487857/110522058/110486684/110538639/110490449/110520187/110538562/100136237/110538568/110502396/110498306/110535407/110485267/110485268/110486597/110519082/110535410/110528439/110488730/110535736/110519409/110489090/110504684/110510110/110534117/110492703/110538212/110488210/110494025/110524902/110491399/110498196/110535643/110529864/110497438/110493637/110532136/110534441/110533383…	99
Metabolism	Amino acid metabolism	omy00270	Cysteine and methionine metabolism	49/4847	104/13980	0.471154	1.35893	2.67646	0.00572765	0.0274324	0.0196739	110520495/110527472/110520091/100136726/110527644/110528086/110536504/110523310/110537069/110524183/110537066/110525708/110532297/110490604/110531067/110500186/110538599/110486641/110494358/110500268/110524884/110536081/110536779/110524422/110532317/100136010/110502651/110490189/110523691/110520559/110509664/110490242/110500231/110486012/110506251/110505844/110486372/110538418/110534059/110509902…	49
Genetic Information Processing	Folding, sorting and degradation	omy03050	Proteasome	52/4847	113/13980	0.460177	1.32727	2.54461	0.00805006	0.032558	0.0233499	110530815/110526739/110526776/110488465/110488063/100305150/110498814/100135869/110496227/110496228/110490619/110488394/110522560/110534045/100135928/110489573/110493640/110499788/110491437/110535446/110503043/110521997/110507251/110521740/100305171/110530619/110526547/110528031/110526844/110526846/110535189/110506507/110485989/110496728/110508390/110521282/110492454/110524524/110496681/110507572…	52
Genetic Information Processing	Translation	omy03008	Ribosome biogenesis in eukaryotes	69/4847	151/13980	0.456954	1.31797	2.86187	0.00316021	0.0169164	0.0121321	110512218/100305178/110530214/110493986/110497020/110486195/110522080/110520732/118936609/110524379/110496662/110494006/110501551/110497930/110486452/110530259/110528522/110494472/110536429/110521513/110526053/110488044/110527980/110533406/110497439/110534440/100301754/110494569/110523881/110533950/110507876/110537348/110488421/110496050/110538837/100301792/110526880/110509095/110509098/110520019…	69
Cellular Processes	Cell growth and death	omy04114	Oocyte meiosis	119/4847	261/13980	0.455939	1.31504	3.74282	0.000150971	0.00144614	0.00103714	110522951/110532744/100136197/110524540/110520268/110526255/110526035/110535142/110486660/110538620/110488702/110535929/110522490/110521954/110531869/100136597/110519964/110485931/110493657/110535412/110529111/110531833/110486718/110538670/100136194/110494762/110494767/110497694/100136691/110493323/110493427/118936477/100136192/110522515/110497737/110502333/110503503/110505729/110507424/110509958…	119
Cellular Processes	Transport and catabolism	omy04140	Autophagy - animal	193/4847	424/13980	0.455189	1.31288	4.76612	1.81705e-06	2.75586e-05	1.97644e-05	110535756/110506298/100135798/110531799/118966075/110525986/110530779/110530052/110530129/110531423/110508899/110524136/110530139/110523395/110530807/118936409/110529288/110522122/110526257/110535142/110536016/110534090/110534114/110488604/110514282/110537275/110521954/110528986/100136597/110497629/100170208/110528142/110524873/110531818/110495622/110521824/110495616/110491541/110523476/110504005…	193
Cellular Processes	Cell growth and death	omy04115	p53 signaling pathway	78/4847	172/13980	0.453488	1.30798	2.96064	0.00230061	0.0129087	0.00925782	100301708/110523127/110526223/110526228/100305340/110530629/110531459/110526255/110529910/110528986/110500074/110531824/110522361/110530310/110522065/100136691/110537353/110496645/110520394/110520078/110538228/110497496/110491376/110523488/110536901/110488025/110524616/110494604/110536341/110497067/110498185/110537938/110498391/110532164/100136737/110489167/110521308/110524590/110528028/110525971…	78
Metabolism	Amino acid metabolism	omy00310	Lysine degradation	59/4847	132/13980	0.44697	1.28918	2.43178	0.0105315	0.0416683	0.0298836	110520835/110528925/110523849/110486659/110488596/110528868/110520820/110495327/110535410/110487650/110538212/110493265/110485680/110497925/110536201/110532881/110492276/110507387/110503243/110536785/110533599/110522350/110537937/110532167/110491964/110489176/110538034/110533684/110538293/110506302/110520688/110520608/110522634/110523727/110488800/110500455/110537198/110504362/110505842/110497328…	59
Cellular Processes	Cell growth and death	omy04110	Cell cycle	151/4847	343/13980	0.440233	1.26975	3.68478	0.000177017	0.0015444	0.00110761	100301708/110526228/100136197/110530628/110524540/110527649/110526791/110526255/110497075/110517300/110487857/110535929/110518846/110525224/110522490/110529924/110500074/110485267/110485268/110530863/110531824/110519964/110485931/110493657/110535412/110525240/110499234/100136194/110488280/110519367/100136691/110493323/110493427/118936477/100136192/110496645/110490475/110497921/110537675/110537360…	151
Environmental Information Processing	Signal transduction	omy04070	Phosphatidylinositol signaling system	100/4847	228/13980	0.438596	1.26503	2.93927	0.00234059	0.0129087	0.00925782	110530052/110530129/110529060/110532153/110524859/110528263/110525868/110489365/110485454/110485456/110494838/110528986/110535404/110535850/110491367/110498974/110521824/110523476/110528513/110497694/110537355/110517587/110528761/110486211/110497737/110502333/110503503/110505729/110507424/110509958/110522561/110527080/110529767/110533970/110494163/110525468/110491376/110525520/110498080/110501571…	100
Metabolism	Carbohydrate metabolism	omy00562	Inositol phosphate metabolism	78/4847	179/13980	0.435754	1.25683	2.51931	0.00801431	0.032558	0.0233499	110517847/110522458/110530052/110529060/110532153/110524859/110528263/110489365/110528965/110485454/110485456/110494838/110528986/110535404/110535850/110491367/110498974/110528513/110537355/110517587/110528761/110486211/110494163/110491372/110525468/110491376/110525520/110498080/110501571/110491405/110536168/110529235/110535428/110495689/110520241/110537933/110507392/110505606/110532655/110522256…	78
Organismal Systems	Endocrine system	omy04910	Insulin signaling pathway	147/4847	339/13980	0.433628	1.2507	3.40402	0.00048512	0.00367882	0.00263837	110530052/110530129/110531423/110533469/110525863/110512480/110535142/110486660/110538620/100505414/110488604/110521954/100136597/110492134/110497629/100170208/110521824/110526270/100305244/110530894/110531833/110523476/110524378/110486718/110538670/110531720/110485936/110534357/110497524/110490114/110486079/110494318/110522515/110535740/100136666/110502329/110497737/110502333/110503503/110505729…	147
Cellular Processes	Cell growth and death	omy04218	Cellular senescence	172/4847	397/13980	0.433249	1.2496	3.67549	0.0001782	0.0015444	0.00110761	100301708/110523921/110522951/110526228/110518416/110530052/110530129/110532744/110527649/110531459/110526791/110526255/110535142/110529912/110486660/110538620/110488702/110537065/110529924/110528986/110497629/100170208/110500074/110499184/110521824/110522530/110496224/110531824/100305244/110531833/110523476/110531834/110499234/110494762/110497694/110492056/110519367/100136691/110496645/110494318…	172
Organismal Systems	Endocrine system	omy04914	Progesterone-mediated oocyte maturation	88/4847	204/13980	0.431373	1.24419	2.55946	0.00706716	0.0313713	0.0224988	110522951/110530052/110530129/110532744/110524540/110520268/100136599/110522488/110535142/110535929/110488604/110521954/100136597/110497629/100170208/110521824/110519964/110485931/110493657/110532808/110523476/110486718/110538670/110494762/110494767/100136691/100301656/110501024/100135872/110489115/110522300/110537780/110526678/118965967/110494345/110539092/110531246/110530540/110530703/110529687…	88
Human Diseases	Infectious disease: bacterial	omy05100	Bacterial invasion of epithelial cells	94/4847	219/13980	0.429224	1.23799	2.58599	0.00651297	0.029634	0.0212528	110494902/110529252/110530052/110530129/110533469/110528266/110512888/110535244/110530166/110494296/110528143/110495471/110527224/110495454/110537756/110521824/110497361/110492053/110523476/110530238/110494156/110496650/110486726/110538675/110536196/110492153/110490121/110496881/110499995/110522288/110488032/110533644/110487113/118937811/110531342/110497422/110532620/110503240/110530540/110529666…	94
Metabolism	Global and overview maps	omy01200	Carbon metabolism	108/4847	252/13980	0.428571	1.23611	2.75537	0.00397217	0.0200815	0.014402	110517847/110488064/110527513/110522458/110536519/100136164/110525913/100499608/110520091/110525863/110536504/110523407/110533249/110526268/110527962/100301669/100136067/110492324/110492247/110520756/110493407/118940026/110530856/110500378/110486418/110498317/100653478/110519912/110530082/110495360/110523331/110499257/110491790/110494773/110521627/110497925/110520436/110485953/110497514/110539093…	108
Environmental Information Processing	Signal transduction	omy04012	ErbB signaling pathway	95/4847	223/13980	0.426009	1.22872	2.5082	0.00801492	0.032558	0.0233499	110530052/110530129/110533469/110527649/110526035/110535142/110488604/110529924/110531869/110493585/100135887/110497629/100170208/110521572/110521824/110497361/110492053/110494311/100305244/110538572/110523476/110486602/110534357/110497524/110538192/110490114/110486079/110496881/110527469/110504531/110501619/110535279/110522300/110489727/110490874/110490138/110531342/110532620/110539092/110530532…	95
Environmental Information Processing	Signal transduction	omy04068	FoxO signaling pathway	153/4847	362/13980	0.422652	1.21904	3.07598	0.00142781	0.00896074	0.00642644	100301708/110523127/110522951/110526228/110530052/110530129/110531423/110532744/110524862/110530797/110526791/118936409/110535142/110529912/110530070/110489691/110488604/110537275/110528986/110497629/100170208/110500074/100136756/110531818/110485267/110485268/110524203/110521824/110491527/110488417/110527676/110523476/110525240/110499234/110531720/110488280/110494762/110519367/110486430/100136691…	153
Human Diseases	Infectious disease: bacterial	omy05132	Salmonella infection	270/4847	641/13980	0.421217	1.2149	4.05759	3.67551e-05	0.00041809	0.000299845	110522013/110529807/110522464/110539162/110510474/110520886/110523429/110523432/110522951/110526223/110529252/110530052/110532744/110530629/110527649/110513614/110521454/110520522/100136599/110522488/110529288/110522122/110528266/110512888/110535244/110535142/110522049/110536234/110536252/118936967/110537664/100136718/110530438/110536016/110485093/110514295/110488604/110531486/110486260/110538189…	270
Cellular Processes	Transport and catabolism	omy04144	Endocytosis	274/4847	661/13980	0.414523	1.19559	3.75306	0.000121893	0.00123247	0.000883901	110510437/110523136/110530621/110521480/110487493/110522817/110520265/110529252/110528256/110527643/110510106/110530798/118936675/110530807/110533814/110526791/110523400/110537113/110526263/110527770/118936345/110529915/110521566/110536016/100301824/110522056/110486260/110538189/110530166/110532593/110491618/110496611/110494296/110528143/110487897/110528142/110495471/110490593/110515550/110520362…	274
